# Supplementary material for: Effect of Local Heterogeneities on Single-Layer DNA-Directed Protein Lattices Through Non-Averaged Single-Molecule 3D Structure Determination
Source: Research Square preprint supplement (doi:10.21203/rs.3.rs-6095207/v1), 2025-04-04
Supplement: Supplementary file 1 [file 16e6ee4550877b2cc4834197.pdf]

**Effect of Local Heterogeneities on Single-Layer DNA-Directed Protein Lattices Through Non-Averaged Single-Molecule 3D Structure Determination**

Jianfang Liu<sup>1,\*</sup>, Shih-Ting Wang<sup>2</sup>, Meng Zhang<sup>1</sup>, Zijian Hu<sup>1,3</sup>, Hao Wu<sup>3</sup>, Oleg Gang<sup>2,4,5,\*</sup> and Gang Ren<sup>1,\*</sup>

<sup>1</sup> The Molecular Foundry, Lawrence Berkeley National Laboratory, Berkeley, CA, 94720, USA;

<sup>2</sup> Center for Functional Nanomaterials, Brookhaven National Laboratory, Upton, NY, 11973, USA;

<sup>3</sup> College of Artificial Intelligence, Beijing Normal University, Beijing, China;

<sup>4</sup> Department of Chemical Engineering, Columbia University, New York City, NY, 10027, USA;

<sup>5</sup> Department of Applied Physics and Applied Mathematics, Columbia University, New York City, NY, 10027, USA.

\*Corresponding Author

Gang Ren, E-mail: [gren@lbl.gov](mailto:gren@lbl.gov); Jianfang Liu, E-mail: [jianfangliu@lbl.gov](mailto:jianfangliu@lbl.gov); Oleg Gang, E-mail: [og2226@columbia.edu](mailto:og2226@columbia.edu)

|                                                                                                   |        |
|---------------------------------------------------------------------------------------------------|--------|
| Supplementary Video 1. 3D reconstruction process of 2D lattices with 100% ferritin .....          | 2      |
| Supplementary Video 2. 3D reconstruction process of 2D lattices with 70% ferritin .....           | 3      |
| Supplementary Video 3. 3D reconstruction process of 2D lattices without ferritin.....             | 4      |
| Supplementary Video 4. MD simulations of 2D lattices without ferritin .....                       | 5      |
| Supplementary Table 1. Detailed information on IPET 3D reconstructions of all units.....          | 6-12   |
| Supplementary Fig. 1. Secondary structure of DNA origami octahedral cage .....                    | 13     |
| Supplementary Fig. 2. IPET 3D reconstruction intermediate of 4 unit-cell particle .....           | 14     |
| Supplementary Fig. 3. Statistical analysis of structural variability in unit-cell particles ..... | 15     |
| Supplementary Fig. 4. Correlation between particle size and lattice lengths .....                 | 16     |
| Supplementary Fig. 5. Correlation between linker and lattice .....                                | 17     |
| Supplementary Fig. 6. MD simulation of particles and their 2D lattices .....                      | 18     |
| Supplementary Fig. 7. Pore size variability by MD simulations .....                               | 19     |
| Supplementary Fig. 8. Analysis of structural variability after repaired.....                      | 20     |
| Supplementary Fig. 9-345. IPET 3D and fitting model of an individual particle .....               | 21-357 |

### Supplementary Videos:

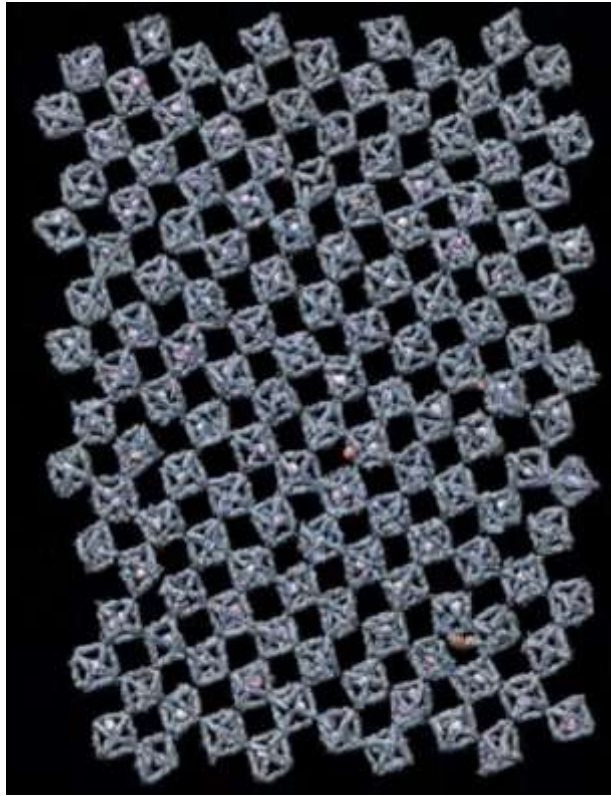

**Supplementary Video 1: Analysis of 3D reconstruction of a low-ordered 2D lattice of DNA-origami octahedral cages loaded with 100% ferritin.** This video illustrates the cryo-ET and IPET 3D reconstruction process of DNA origami 2D lattices fully loaded with ferritin. It showcases the detailed steps involved in obtaining the final 3D model and performing the distortion analysis of the lattice.

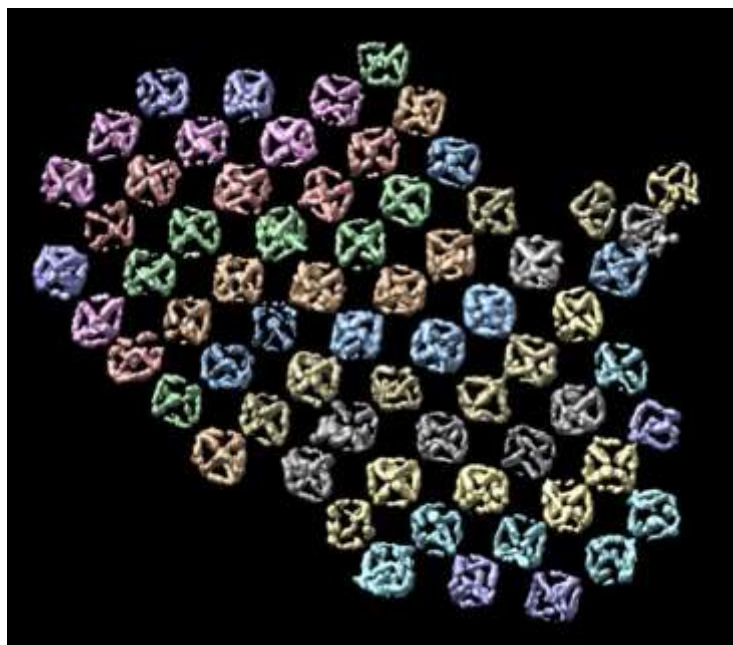

**Supplementary Video 2: Analysis of 3D reconstruction of a low-ordered 2D lattice of DNA-origami octahedral cages loaded with 70% ferritin.** This video illustrates the cryo-ET and IPET 3D reconstruction process of DNA origami 2D lattices fully loaded with ferritin. It showcases the detailed steps involved in obtaining the final 3D model and performing the distortion analysis of the lattice.

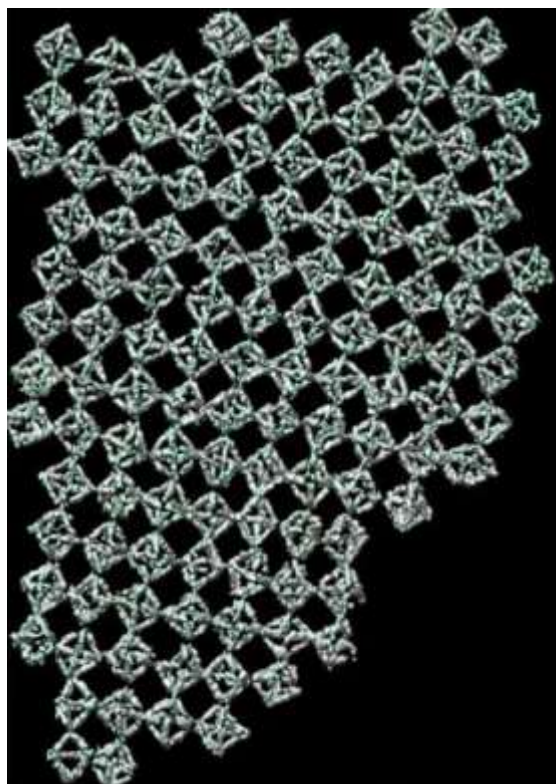

**Supplementary Video 3: Analysis of 3D reconstruction of a low-ordered 2D lattice of DNA-origami octahedral cages without ferritin loading.** This video illustrates the cryo-ET and IPET 3D reconstruction process of DNA origami 2D lattices without ferritin loading. It showcases the detailed steps involved in obtaining the final 3D model and performing the distortion analysis of the lattice.



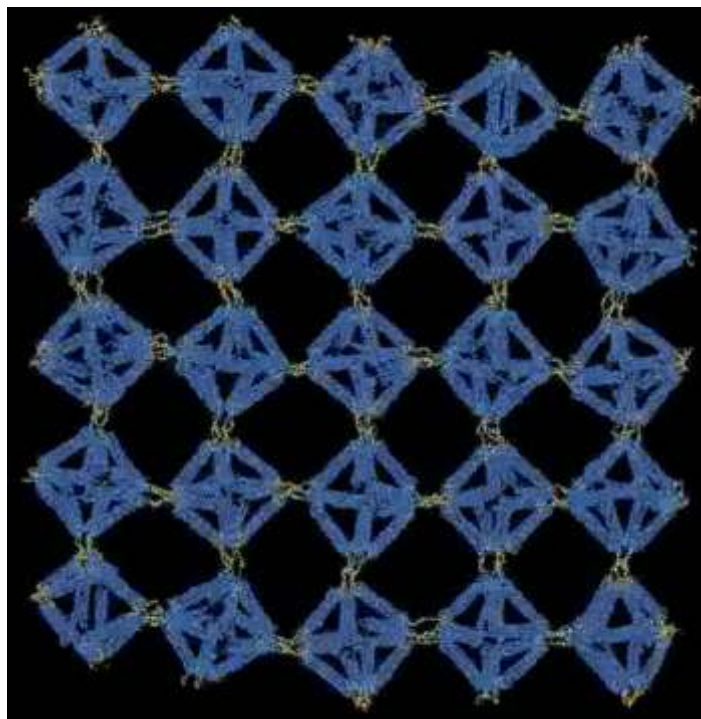

**Supplementary Video 4: MD simulations of a 5x5 lattice of DNA-origami octahedral cages without ferritin loading.** This video illustrates the MD simulation process of 5 x 5 unit-cell formed DNA origami 2D lattices without ferritin loading.

**Supplementary Table 1.** The parameters of IPET 3D reconstructions of the unit-cell particles

| Part. ID | Sample    | EMDB ID               | TEM, camera, CDS mode | Mag. and Å/pix (Å) | Dose rate (e <sup>-</sup> Å <sup>-2</sup> s <sup>-1</sup> ) | Exp. time (s) | Total dose (e <sup>-</sup> Å <sup>-2</sup> ) | Angle range; step | Contour levels | Resolutions (Å)  |                    |                   | Ferritin # | Figure # |
|----------|-----------|-----------------------|-----------------------|--------------------|-------------------------------------------------------------|---------------|----------------------------------------------|-------------------|----------------|------------------|--------------------|-------------------|------------|----------|
|          |           |                       |                       |                    |                                                             |               |                                              |                   |                | Map-map FSC @0.5 | Map-map FSC @0.143 | Map-model FSC@0.5 |            |          |
| 1        | 100% load | <a href="#">46070</a> | Krios G2, K3, Yes     | 53Kx, 1.46 Å       | 3.0                                                         | 2.2           | 231                                          | -51° to +51°; 3°  | 0.6/1.0        | 64               | 20                 | 82                | 1          | S9       |
| 2        | 100% load | <a href="#">46071</a> | Krios G2, K3, Yes     | 53Kx, 1.46 Å       | 3.0                                                         | 2.2           | 231                                          | -51° to +51°; 3°  | 0.6/1.0        | 77               | 19                 | 75                | 1          | S10      |
| 3        | 100% load | <a href="#">46072</a> | Krios G2, K3, Yes     | 53Kx, 1.46 Å       | 3.0                                                         | 2.2           | 231                                          | -51° to +51°; 3°  | 0.6/1.0        | 70               | 20                 | 90                | 2          | S11      |
| 4        | 100% load | <a href="#">46073</a> | Krios G2, K3, Yes     | 53Kx, 1.46 Å       | 3.0                                                         | 2.2           | 231                                          | -51° to +51°; 3°  | 0.6/1.0        | 72               | 20                 | 83                | 1          | S12      |
| 5        | 100% load | <a href="#">46074</a> | Krios G2, K3, Yes     | 53Kx, 1.46 Å       | 3.0                                                         | 2.2           | 231                                          | -51° to +51°; 3°  | 0.6/1.0        | 74               | 19                 | 73                | 2          | S13      |
| 6        | 100% load | <a href="#">46075</a> | Krios G2, K3, No      | 53Kx, 1.46 Å       | 6.0                                                         | 1.0           | 210                                          | -51° to +51°; 3°  | 0.6/1.0        | 75               | 28                 | 88                | 1          | S14      |
| 7        | 100% load | <a href="#">46076</a> | Krios G2, K3, No      | 53Kx, 1.46 Å       | 6.0                                                         | 1.0           | 210                                          | -51° to +51°; 3°  | 0.6/1.0        | 89               | 29                 | 82                | 1          | S15      |
| 8        | 100% load | <a href="#">46077</a> | Krios G2, K3, No      | 53Kx, 1.46 Å       | 6.0                                                         | 1.0           | 210                                          | -51° to +51°; 3°  | 0.6/1.0        | 88               | 31                 | 80                | 1          | S16      |
| 9        | 100% load | <a href="#">46078</a> | Krios G2, K3, No      | 53Kx, 1.46 Å       | 6.0                                                         | 1.0           | 210                                          | -51° to +51°; 3°  | 0.6/1.0        | 69               | 28                 | 350               | 1          | S17      |
| 10       | 100% load | <a href="#">46079</a> | Krios G2, K3, No      | 53Kx, 1.46 Å       | 6.0                                                         | 1.0           | 210                                          | -51° to +51°; 3°  | 0.6/1.0        | 85               | 30                 | 78                | 1          | S18      |
| 11       | 100% load | <a href="#">46080</a> | Krios G2, K3, No      | 53Kx, 1.46 Å       | 6.0                                                         | 1.0           | 210                                          | -51° to +51°; 3°  | 0.6/1.0        | 80               | 30                 | 76                | 1          | S19      |
| 12       | 100% load | <a href="#">46081</a> | Krios G2, K3, No      | 53Kx, 1.46 Å       | 6.0                                                         | 1.0           | 210                                          | -51° to +51°; 3°  | 0.6/1.0        | 252              | 63                 | 79                | 1          | S20      |
| 13       | 100% load | <a href="#">46082</a> | Krios G2, K3, No      | 53Kx, 1.46 Å       | 6.0                                                         | 1.0           | 210                                          | -51° to +51°; 3°  | 0.6/1.0        | 71               | 28                 | 302               | 1          | S21      |
| 14       | 100% load | <a href="#">46083</a> | Krios G2, K3, No      | 53Kx, 1.46 Å       | 6.0                                                         | 1.0           | 210                                          | -51° to +51°; 3°  | 0.6/1.0        | 76               | 29                 | 91                | 1          | S22      |
| 15       | 100% load | <a href="#">46084</a> | Krios G2, K3, No      | 53Kx, 1.46 Å       | 6.0                                                         | 1.0           | 210                                          | -51° to +51°; 3°  | 0.6/1.0        | 36               | 29                 | 233               | 2          | S23      |
| 16       | 100% load | <a href="#">46085</a> | Krios G2, K3, No      | 53Kx, 1.46 Å       | 6.0                                                         | 1.0           | 210                                          | -51° to +51°; 3°  | 0.6/1.0        | 83               | 27                 | 103               | 1          | S24      |
| 17       | 100% load | <a href="#">46086</a> | Krios G2, K3, No      | 53Kx, 1.46 Å       | 6.0                                                         | 1.0           | 210                                          | -51° to +51°; 3°  | 0.6/1.0        | 83               | 29                 | 280               | 1          | S25      |
| 18       | 100% load | <a href="#">46087</a> | Krios G2, K3, No      | 53Kx, 1.46 Å       | 6.0                                                         | 1.0           | 210                                          | -51° to +51°; 3°  | 0.6/1.0        | 74               | 30                 | 262               | 2          | S26      |
| 19       | 100% load | <a href="#">46088</a> | Krios G2, K3, No      | 53Kx, 1.46 Å       | 6.0                                                         | 1.0           | 210                                          | -51° to +51°; 3°  | 0.6/1.0        | 80               | 30                 | 260               | 1          | S27      |
| 20       | 100% load | <a href="#">46089</a> | Krios G2, K3, No      | 53Kx, 1.46 Å       | 6.0                                                         | 1.0           | 210                                          | -51° to +51°; 3°  | 0.6/1.0        | 80               | 30                 | 253               | 1          | S28      |
| 21       | 100% load | <a href="#">46090</a> | Krios G2, K3, No      | 53Kx, 1.46 Å       | 6.0                                                         | 1.0           | 210                                          | -51° to +51°; 3°  | 0.6/1.0        | 88               | 68                 | 80                | 1          | S29      |
| 22       | 100% load | <a href="#">46091</a> | Krios G2, K3, No      | 53Kx, 1.46 Å       | 6.0                                                         | 1.0           | 210                                          | -51° to +51°; 3°  | 0.6/1.0        | 74               | 28                 | 75                | 1          | S30      |
| 23       | 100% load | <a href="#">46092</a> | Krios G2, K3, No      | 53Kx, 1.46 Å       | 6.0                                                         | 1.0           | 210                                          | -51° to +51°; 3°  | 0.6/1.0        | 84               | 29                 | 75                | 1          | S31      |
| 24       | 100% load | <a href="#">46093</a> | Krios G2, K3, No      | 53Kx, 1.46 Å       | 6.0                                                         | 1.0           | 210                                          | -51° to +51°; 3°  | 0.6/1.0        | 76               | 29                 | 77                | 1          | S32      |
| 25       | 100% load | <a href="#">46094</a> | Krios G2, K3, No      | 53Kx, 1.46 Å       | 6.0                                                         | 1.0           | 210                                          | -51° to +51°; 3°  | 0.6/1.0        | 75               | 27                 | 128               | 1          | S33      |
| 26       | 100% load | <a href="#">46095</a> | Krios G2, K3, No      | 53Kx, 1.46 Å       | 6.0                                                         | 1.0           | 210                                          | -51° to +51°; 3°  | 0.6/1.0        | 71               | 29                 | 100               | 2          | S34      |
| 27       | 100% load | <a href="#">46096</a> | Krios G2, K3, No      | 53Kx, 1.46 Å       | 6.0                                                         | 1.0           | 210                                          | -51° to +51°; 3°  | 0.6/1.0        | 71               | 29                 | 107               | 2          | S35      |
| 28       | 100% load | <a href="#">46097</a> | Krios G2, K3, No      | 53Kx, 1.46 Å       | 6.0                                                         | 1.0           | 210                                          | -51° to +51°; 3°  | 0.6/1.0        | 71               | 29                 | 67                | 1          | S36      |
| 29       | 100% load | <a href="#">46098</a> | Krios G2, K3, No      | 53Kx, 1.46 Å       | 6.0                                                         | 1.0           | 210                                          | -51° to +51°; 3°  | 0.6/1.0        | 82               | 69                 | 90                | 1          | S37      |
| 30       | 100% load | <a href="#">46099</a> | Krios G2, K3, No      | 53Kx, 1.46 Å       | 6.0                                                         | 1.0           | 210                                          | -51° to +51°; 3°  | 0.6/1.0        | 75               | 30                 | 127               | 2          | S38      |
| 31       | 100% load | <a href="#">46100</a> | Krios G2, K3, No      | 53Kx, 1.46 Å       | 6.0                                                         | 1.0           | 210                                          | -51° to +51°; 3°  | 0.6/1.0        | 47               | 27                 | 125               | 1          | S39      |
| 32       | 100% load | <a href="#">46101</a> | Krios G2, K3, No      | 53Kx, 1.46 Å       | 6.0                                                         | 1.0           | 210                                          | -51° to +51°; 3°  | 0.6/1.0        | 37               | 28                 | 117               | 3          | S40      |
| 33       | 100% load | <a href="#">46102</a> | Krios G2, K3, No      | 53Kx, 1.46 Å       | 6.0                                                         | 1.0           | 210                                          | -51° to +51°; 3°  | 0.6/1.0        | 36               | 27                 | 125               | 2          | S41      |
| 34       | 100% load | <a href="#">46103</a> | Krios G2, K3, No      | 53Kx, 1.46 Å       | 6.0                                                         | 1.0           | 210                                          | -51° to +51°; 3°  | 0.6/1.0        | 72               | 28                 | 110               | 2          | S42      |
| 35       | 100% load | <a href="#">46104</a> | Krios G2, K3, No      | 53Kx, 1.46 Å       | 6.0                                                         | 1.0           | 210                                          | -51° to +51°; 3°  | 0.6/1.0        | 72               | 32                 | 80                | 0          | S43      |
| 36       | 100% load | <a href="#">46105</a> | Krios G2, K3, No      | 53Kx, 1.46 Å       | 6.0                                                         | 1.0           | 210                                          | -51° to +51°; 3°  | 0.6/1.0        | 72               | 28                 | 79                | 1          | S44      |
| 37       | 100% load | <a href="#">46106</a> | Krios G2, K3, No      | 53Kx, 1.46 Å       | 6.0                                                         | 1.0           | 210                                          | -51° to +51°; 3°  | 0.6/1.0        | 75               | 29                 | 92                | 1          | S45      |
| 38       | 100% load | <a href="#">46107</a> | Krios G2, K3, No      | 53Kx, 1.46 Å       | 6.0                                                         | 1.0           | 210                                          | -51° to +51°; 3°  | 0.6/1.0        | 72               | 29                 | 156               | 2          | S46      |
| 39       | 100% load | <a href="#">46108</a> | Krios G2, K3, No      | 53Kx, 1.46 Å       | 6.0                                                         | 1.0           | 210                                          | -51° to +51°; 3°  | 0.6/1.0        | 72               | 29                 | 86                | 1          | S47      |
| 40       | 100% load | <a href="#">46109</a> | Krios G2, K3, No      | 53Kx, 1.46 Å       | 6.0                                                         | 1.0           | 210                                          | -51° to +51°; 3°  | 0.6/1.0        | 84               | 28                 | 88                | 1          | S48      |
| 41       | 100% load | <a href="#">46110</a> | Krios G2, K3, No      | 53Kx, 1.46 Å       | 6.0                                                         | 1.0           | 210                                          | -51° to +51°; 3°  | 0.6/1.0        | 81               | 40                 | 81                | 1          | S49      |
| 42       | 100% load | <a href="#">46111</a> | Krios G2, K3, No      | 53Kx, 1.46 Å       | 6.0                                                         | 1.0           | 210                                          | -51° to +51°; 3°  | 0.6/1.0        | 78               | 31                 | 77                | 2          | S50      |
| 43       | 100% load | <a href="#">46112</a> | Krios G2, K3, No      | 53Kx, 1.46 Å       | 6.0                                                         | 1.0           | 210                                          | -51° to +51°; 3°  | 0.6/1.0        | 86               | 27                 | 83                | 1          | S51      |
| 44       | 100% load | <a href="#">46113</a> | Krios G2, K3, No      | 53Kx, 1.46 Å       | 6.0                                                         | 1.0           | 210                                          | -51° to +51°; 3°  | 0.6/1.0        | 76               | 32                 | 86                | 2          | S52      |
| 45       | 100% load | <a href="#">46114</a> | Krios G2, K3, No      | 53Kx, 1.46 Å       | 6.0                                                         | 1.0           | 210                                          | -51° to +51°; 3°  | 0.6/1.0        | 75               | 29                 | 92                | 2          | S53      |
| 46       | 100% load | <a href="#">46115</a> | Krios G2, K3, No      | 53Kx, 1.46 Å       | 6.0                                                         | 1.0           | 210                                          | -51° to +51°; 3°  | 0.6/1.0        | 47               | 30                 | 89                | 1          | S54      |

|    |           |                       |                  |              |     |     |     |                  |         |     |    |     |   |      |
|----|-----------|-----------------------|------------------|--------------|-----|-----|-----|------------------|---------|-----|----|-----|---|------|
| 47 | 100% load | <a href="#">46116</a> | Krios G2, K3, No | 53Kx, 1.46 Å | 6.0 | 1.0 | 210 | -51° to +51°; 3° | 0.6/1.0 | 66  | 29 | 91  | 1 | S55  |
| 48 | 100% load | <a href="#">46117</a> | Krios G2, K3, No | 53Kx, 1.46 Å | 6.0 | 1.0 | 210 | -51° to +51°; 3° | 0.6/1.0 | 64  | 28 | 272 | 1 | S56  |
| 49 | 100% load | <a href="#">46118</a> | Krios G2, K3, No | 53Kx, 1.46 Å | 6.0 | 1.0 | 210 | -51° to +51°; 3° | 0.6/1.0 | 82  | 30 | 73  | 1 | S57  |
| 50 | 100% load | <a href="#">46119</a> | Krios G2, K3, No | 53Kx, 1.46 Å | 6.0 | 1.0 | 210 | -51° to +51°; 3° | 0.6/1.0 | 69  | 29 | 74  | 1 | S58  |
| 51 | 100% load | <a href="#">46120</a> | Krios G2, K3, No | 53Kx, 1.46 Å | 6.0 | 1.0 | 210 | -51° to +51°; 3° | 0.6/1.0 | 63  | 28 | 91  | 1 | S59  |
| 52 | 100% load | <a href="#">46121</a> | Krios G2, K3, No | 53Kx, 1.46 Å | 6.0 | 1.0 | 210 | -51° to +51°; 3° | 0.6/1.0 | 120 | 30 | 267 | 1 | S60  |
| 53 | 100% load | <a href="#">46122</a> | Krios G2, K3, No | 53Kx, 1.46 Å | 6.0 | 1.0 | 210 | -51° to +51°; 3° | 0.6/1.0 | 76  | 31 | 74  | 1 | S61  |
| 54 | 100% load | <a href="#">46123</a> | Krios G2, K3, No | 53Kx, 1.46 Å | 6.0 | 1.0 | 210 | -51° to +51°; 3° | 0.6/1.0 | 78  | 30 | 152 | 2 | S62  |
| 55 | 100% load | <a href="#">46124</a> | Krios G2, K3, No | 53Kx, 1.46 Å | 6.0 | 1.0 | 210 | -51° to +51°; 3° | 0.6/1.0 | 80  | 29 | 76  | 1 | S63  |
| 56 | 100% load | <a href="#">46125</a> | Krios G2, K3, No | 53Kx, 1.46 Å | 6.0 | 1.0 | 210 | -51° to +51°; 3° | 0.6/1.0 | 81  | 29 | 84  | 2 | S64  |
| 57 | 100% load | <a href="#">46126</a> | Krios G2, K3, No | 53Kx, 1.46 Å | 6.0 | 1.0 | 210 | -51° to +51°; 3° | 0.6/1.0 | 78  | 30 | 77  | 1 | S65  |
| 58 | 100% load | <a href="#">46127</a> | Krios G2, K3, No | 53Kx, 1.46 Å | 6.0 | 1.0 | 210 | -51° to +51°; 3° | 0.6/1.0 | 70  | 29 | 79  | 1 | S66  |
| 59 | 100% load | <a href="#">46128</a> | Krios G2, K3, No | 53Kx, 1.46 Å | 6.0 | 1.0 | 210 | -51° to +51°; 3° | 0.6/1.0 | 75  | 30 | 260 | 1 | S67  |
| 60 | 100% load | <a href="#">46129</a> | Krios G2, K3, No | 53Kx, 1.46 Å | 6.0 | 1.0 | 210 | -51° to +51°; 3° | 0.6/1.0 | 65  | 29 | 195 | 1 | S68  |
| 61 | 100% load | <a href="#">46130</a> | Krios G2, K3, No | 53Kx, 1.46 Å | 6.0 | 1.0 | 210 | -51° to +51°; 3° | 0.6/1.0 | 86  | 29 | 82  | 2 | S69  |
| 62 | 100% load | <a href="#">46131</a> | Krios G2, K3, No | 53Kx, 1.46 Å | 6.0 | 1.0 | 210 | -51° to +51°; 3° | 0.6/1.0 | 67  | 29 | 139 | 2 | S70  |
| 63 | 100% load | <a href="#">46132</a> | Krios G2, K3, No | 53Kx, 1.46 Å | 6.0 | 1.0 | 210 | -51° to +51°; 3° | 0.6/1.0 | 72  | 29 | 82  | 1 | S71  |
| 64 | 100% load | <a href="#">46133</a> | Krios G2, K3, No | 53Kx, 1.46 Å | 6.0 | 1.0 | 210 | -51° to +51°; 3° | 0.6/1.0 | 94  | 30 | 90  | 1 | S72  |
| 65 | 100% load | <a href="#">46134</a> | Krios G2, K3, No | 53Kx, 1.46 Å | 6.0 | 1.0 | 210 | -51° to +51°; 3° | 0.6/1.0 | 73  | 30 | 292 | 1 | S73  |
| 66 | 100% load | <a href="#">46135</a> | Krios G2, K3, No | 53Kx, 1.46 Å | 6.0 | 1.0 | 210 | -51° to +51°; 3° | 0.6/1.0 | 79  | 29 | 88  | 1 | S74  |
| 67 | 100% load | <a href="#">46136</a> | Krios G2, K3, No | 53Kx, 1.46 Å | 6.0 | 1.0 | 210 | -51° to +51°; 3° | 0.6/1.0 | 63  | 30 | 136 | 2 | S75  |
| 68 | 100% load | <a href="#">46137</a> | Krios G2, K3, No | 53Kx, 1.46 Å | 6.0 | 1.0 | 210 | -51° to +51°; 3° | 0.6/1.0 | 78  | 29 | 81  | 1 | S76  |
| 69 | 100% load | <a href="#">46138</a> | Krios G2, K3, No | 53Kx, 1.46 Å | 6.0 | 1.0 | 210 | -51° to +51°; 3° | 0.6/1.0 | 61  | 29 | 252 | 1 | S77  |
| 70 | 100% load | <a href="#">46139</a> | Krios G2, K3, No | 53Kx, 1.46 Å | 6.0 | 1.0 | 210 | -51° to +51°; 3° | 0.6/1.0 | 73  | 30 | 82  | 1 | S78  |
| 71 | 100% load | <a href="#">46140</a> | Krios G2, K3, No | 53Kx, 1.46 Å | 6.0 | 1.0 | 210 | -51° to +51°; 3° | 0.6/1.0 | 73  | 29 | 89  | 1 | S79  |
| 72 | 100% load | <a href="#">46141</a> | Krios G2, K3, No | 53Kx, 1.46 Å | 6.0 | 1.0 | 210 | -51° to +51°; 3° | 0.6/1.0 | 78  | 30 | 76  | 1 | S80  |
| 73 | 100% load | <a href="#">46142</a> | Krios G2, K3, No | 53Kx, 1.46 Å | 6.0 | 1.0 | 210 | -51° to +51°; 3° | 0.6/1.0 | 72  | 27 | 90  | 1 | S81  |
| 74 | 100% load | <a href="#">46143</a> | Krios G2, K3, No | 53Kx, 1.46 Å | 6.0 | 1.0 | 210 | -51° to +51°; 3° | 0.6/1.0 | 84  | 29 | 72  | 1 | S82  |
| 75 | 100% load | <a href="#">46144</a> | Krios G2, K3, No | 53Kx, 1.46 Å | 6.0 | 1.0 | 210 | -51° to +51°; 3° | 0.6/1.0 | 79  | 30 | 92  | 2 | S83  |
| 76 | 100% load | <a href="#">46145</a> | Krios G2, K3, No | 53Kx, 1.46 Å | 6.0 | 1.0 | 210 | -51° to +51°; 3° | 0.6/1.0 | 81  | 30 | 78  | 1 | S84  |
| 77 | 100% load | <a href="#">46146</a> | Krios G2, K3, No | 53Kx, 1.46 Å | 6.0 | 1.0 | 210 | -51° to +51°; 3° | 0.6/1.0 | 92  | 68 | 82  | 1 | S85  |
| 78 | 100% load | <a href="#">46147</a> | Krios G2, K3, No | 53Kx, 1.46 Å | 6.0 | 1.0 | 210 | -51° to +51°; 3° | 0.6/1.0 | 72  | 30 | 74  | 2 | S86  |
| 79 | 100% load | <a href="#">46148</a> | Krios G2, K3, No | 53Kx, 1.46 Å | 6.0 | 1.0 | 210 | -51° to +51°; 3° | 0.6/1.0 | 73  | 30 | 84  | 1 | S87  |
| 80 | 100% load | <a href="#">46149</a> | Krios G2, K3, No | 53Kx, 1.46 Å | 6.0 | 1.0 | 210 | -51° to +51°; 3° | 0.6/1.0 | 76  | 30 | 320 | 1 | S88  |
| 81 | 100% load | <a href="#">46150</a> | Krios G2, K3, No | 53Kx, 1.46 Å | 6.0 | 1.0 | 210 | -51° to +51°; 3° | 0.6/1.0 | 73  | 29 | 256 | 1 | S89  |
| 82 | 100% load | <a href="#">46151</a> | Krios G2, K3, No | 53Kx, 1.46 Å | 6.0 | 1.0 | 210 | -51° to +51°; 3° | 0.6/1.0 | 69  | 31 | 97  | 2 | S90  |
| 83 | 100% load | <a href="#">46152</a> | Krios G2, K3, No | 53Kx, 1.46 Å | 6.0 | 1.0 | 210 | -51° to +51°; 3° | 0.6/1.0 | 68  | 29 | 70  | 1 | S91  |
| 84 | 100% load | <a href="#">46153</a> | Krios G2, K3, No | 53Kx, 1.46 Å | 6.0 | 1.0 | 210 | -51° to +51°; 3° | 0.6/1.0 | 75  | 28 | 91  | 1 | S92  |
| 85 | 100% load | <a href="#">46154</a> | Krios G2, K3, No | 53Kx, 1.46 Å | 6.0 | 1.0 | 210 | -51° to +51°; 3° | 0.6/1.0 | 71  | 30 | 101 | 1 | S93  |
| 86 | 100% load | <a href="#">46155</a> | Krios G2, K3, No | 53Kx, 1.46 Å | 6.0 | 1.0 | 210 | -51° to +51°; 3° | 0.6/1.0 | 75  | 31 | 78  | 1 | S94  |
| 87 | 100% load | <a href="#">46156</a> | Krios G2, K3, No | 53Kx, 1.46 Å | 6.0 | 1.0 | 210 | -51° to +51°; 3° | 0.6/1.0 | 40  | 29 | 134 | 1 | S95  |
| 88 | 100% load | <a href="#">46157</a> | Krios G2, K3, No | 53Kx, 1.46 Å | 6.0 | 1.0 | 210 | -51° to +51°; 3° | 0.6/1.0 | 70  | 31 | 247 | 2 | S96  |
| 89 | 100% load | <a href="#">46158</a> | Krios G2, K3, No | 53Kx, 1.46 Å | 6.0 | 1.0 | 210 | -51° to +51°; 3° | 0.6/1.0 | 66  | 30 | 307 | 1 | S97  |
| 90 | 100% load | <a href="#">46159</a> | Krios G2, K3, No | 53Kx, 1.46 Å | 6.0 | 1.0 | 210 | -51° to +51°; 3° | 0.6/1.0 | 86  | 30 | 97  | 1 | S98  |
| 91 | 100% load | <a href="#">46160</a> | Krios G2, K3, No | 53Kx, 1.46 Å | 6.0 | 1.0 | 210 | -51° to +51°; 3° | 0.6/1.0 | 69  | 29 | 108 | 1 | S99  |
| 92 | 100% load | <a href="#">46161</a> | Krios G2, K3, No | 53Kx, 1.46 Å | 6.0 | 1.0 | 210 | -51° to +51°; 3° | 0.6/1.0 | 79  | 28 | 80  | 1 | S100 |
| 93 | 100% load | <a href="#">46162</a> | Krios G2, K3, No | 53Kx, 1.46 Å | 6.0 | 1.0 | 210 | -51° to +51°; 3° | 0.6/1.0 | 38  | 28 | 276 | 2 | S101 |
| 94 | 100% load | <a href="#">46163</a> | Krios G2, K3, No | 53Kx, 1.46 Å | 6.0 | 1.0 | 210 | -51° to +51°; 3° | 0.6/1.0 | 82  | 30 | 95  | 1 | S102 |
| 95 | 100% load | <a href="#">46164</a> | Krios G2, K3, No | 53Kx, 1.46 Å | 6.0 | 1.0 | 210 | -51° to +51°; 3° | 0.6/1.0 | 71  | 30 | 104 | 1 | S103 |
| 96 | 100% load | <a href="#">46165</a> | Krios G2, K3, No | 53Kx, 1.46 Å | 6.0 | 1.0 | 210 | -51° to +51°; 3° | 0.6/1.0 | 78  | 28 | 110 | 1 | S104 |
| 97 | 100% load | <a href="#">46166</a> | Krios G2, K3, No | 53Kx, 1.46 Å | 6.0 | 1.0 | 210 | -51° to +51°; 3° | 0.6/1.0 | 77  | 31 | 77  | 1 | S105 |

| 98       | 100% load | <a href="#">46167</a> | Krios G2, K3, No      | 53Kx, 1.46 Å      | 6.0                                                         | 1.0           | 210                                          | -51° to +51°; 3°  | 0.6/1.0        | 87               | 30                 | 87                 | 1          | S106     |
|----------|-----------|-----------------------|-----------------------|-------------------|-------------------------------------------------------------|---------------|----------------------------------------------|-------------------|----------------|------------------|--------------------|--------------------|------------|----------|
| 99       | 100% load | <a href="#">46168</a> | Krios G2, K3, No      | 53Kx, 1.46 Å      | 6.0                                                         | 1.0           | 210                                          | -51° to +51°; 3°  | 0.6/1.0        | 72               | 29                 | 94                 | 1          | S107     |
| 100      | 100% load | <a href="#">46169</a> | Krios G2, K3, No      | 53Kx, 1.46 Å      | 6.0                                                         | 1.0           | 210                                          | -51° to +51°; 3°  | 0.6/1.0        | 70               | 30                 | 74                 | 1          | S108     |
| 101      | 100% load | <a href="#">46170</a> | Krios G2, K3, No      | 53Kx, 1.46 Å      | 6.0                                                         | 1.0           | 210                                          | -51° to +51°; 3°  | 0.6/1.0        | 74               | 30                 | 83                 | 1          | S109     |
| 102      | 100% load | <a href="#">46171</a> | Krios G2, K3, No      | 53Kx, 1.46 Å      | 6.0                                                         | 1.0           | 210                                          | -51° to +51°; 3°  | 0.6/1.0        | 70               | 29                 | 134                | 1          | S110     |
| 103      | 100% load | <a href="#">46172</a> | Krios G2, K3, No      | 53Kx, 1.46 Å      | 6.0                                                         | 1.0           | 210                                          | -51° to +51°; 3°  | 0.6/1.0        | 81               | 27                 | 78                 | 1          | S111     |
| 104      | 100% load | <a href="#">46173</a> | Krios G2, K3, No      | 53Kx, 1.46 Å      | 6.0                                                         | 1.0           | 210                                          | -51° to +51°; 3°  | 0.6/1.0        | 72               | 31                 | 74                 | 1          | S112     |
| 105      | 100% load | <a href="#">46174</a> | Krios G2, K3, No      | 53Kx, 1.46 Å      | 6.0                                                         | 1.0           | 210                                          | -51° to +51°; 3°  | 0.6/1.0        | 68               | 29                 | 82                 | 1          | S113     |
| 106      | 100% load | <a href="#">46175</a> | Krios G2, K3, No      | 53Kx, 1.46 Å      | 6.0                                                         | 1.0           | 210                                          | -51° to +51°; 3°  | 0.6/1.0        | 72               | 29                 | 102                | 1          | S114     |
| 107      | 100% load | <a href="#">46176</a> | Krios G2, K3, No      | 53Kx, 1.46 Å      | 6.0                                                         | 1.0           | 210                                          | -51° to +51°; 3°  | 0.6/1.0        | 60               | 28                 | 146                | 3          | S115     |
| 108      | 100% load | <a href="#">46177</a> | Krios G2, K3, No      | 53Kx, 1.46 Å      | 6.0                                                         | 1.0           | 210                                          | -51° to +51°; 3°  | 0.6/1.0        | 64               | 29                 | 116                | 2          | S116     |
| 109      | 100% load | <a href="#">46178</a> | Krios G2, K3, No      | 53Kx, 1.46 Å      | 6.0                                                         | 1.0           | 210                                          | -51° to +51°; 3°  | 0.6/1.0        | 85               | 31                 | 85                 | 1          | S117     |
| 110      | 100% load | <a href="#">46179</a> | Krios G2, K3, No      | 53Kx, 1.46 Å      | 6.0                                                         | 1.0           | 210                                          | -51° to +51°; 3°  | 0.6/1.0        | 86               | 29                 | 85                 | 1          | S118     |
| 111      | 100% load | <a href="#">46180</a> | Krios G2, K3, No      | 53Kx, 1.46 Å      | 6.0                                                         | 1.0           | 210                                          | -51° to +51°; 3°  | 0.6/1.0        | 76               | 28                 | 314                | 2          | S119     |
| 112      | 100% load | <a href="#">46181</a> | Krios G2, K3, No      | 53Kx, 1.46 Å      | 6.0                                                         | 1.0           | 210                                          | -51° to +51°; 3°  | 0.6/1.0        | 87               | 31                 | 77                 | 1          | S120     |
| 113      | 100% load | <a href="#">46182</a> | Krios G2, K3, No      | 53Kx, 1.46 Å      | 6.0                                                         | 1.0           | 210                                          | -51° to +51°; 3°  | 0.6/1.0        | 76               | 30                 | 302                | 1          | S121     |
| 114      | 100% load | <a href="#">46183</a> | Krios G2, K3, No      | 53Kx, 1.46 Å      | 6.0                                                         | 1.0           | 210                                          | -51° to +51°; 3°  | 0.6/1.0        | 82               | 31                 | 82                 | 1          | S122     |
| 115      | 100% load | <a href="#">46184</a> | Krios G2, K3, No      | 53Kx, 1.46 Å      | 6.0                                                         | 1.0           | 210                                          | -51° to +51°; 3°  | 0.6/1.0        | 72               | 29                 | 81                 | 1          | S123     |
| 116      | 100% load | <a href="#">46185</a> | Krios G2, K3, No      | 53Kx, 1.46 Å      | 6.0                                                         | 1.0           | 210                                          | -51° to +51°; 3°  | 0.6/1.0        | 75               | 29                 | 85                 | 1          | S124     |
| 117      | 100% load | <a href="#">46186</a> | Krios G2, K3, No      | 53Kx, 1.46 Å      | 6.0                                                         | 1.0           | 210                                          | -51° to +51°; 3°  | 0.6/1.0        | 73               | 29                 | 77                 | 1          | S125     |
| 118      | 100% load | <a href="#">46187</a> | Krios G2, K3, No      | 53Kx, 1.46 Å      | 6.0                                                         | 1.0           | 210                                          | -51° to +51°; 3°  | 0.6/1.0        | 73               | 31                 | 87                 | 1          | S126     |
| 119      | 100% load | <a href="#">46188</a> | Krios G2, K3, No      | 53Kx, 1.46 Å      | 6.0                                                         | 1.0           | 210                                          | -51° to +51°; 3°  | 0.6/1.0        | 71               | 29                 | 88                 | 1          | S127     |
| 120      | 100% load | <a href="#">46189</a> | Krios G2, K3, No      | 53Kx, 1.46 Å      | 6.0                                                         | 1.0           | 210                                          | -51° to +51°; 3°  | 0.6/1.0        | 68               | 29                 | 78                 | 1          | S128     |
| 121      | 100% load | <a href="#">46190</a> | Krios G2, K3, No      | 53Kx, 1.46 Å      | 6.0                                                         | 1.0           | 210                                          | -51° to +51°; 3°  | 0.6/1.0        | 94               | 30                 | 76                 | 2          | S129     |
| 122      | 100% load | <a href="#">46191</a> | Krios G2, K3, No      | 53Kx, 1.46 Å      | 6.0                                                         | 1.0           | 210                                          | -51° to +51°; 3°  | 0.6/1.0        | 73               | 29                 | 74                 | 1          | S130     |
| 123      | 100% load | <a href="#">46192</a> | Krios G2, K3, No      | 53Kx, 1.46 Å      | 6.0                                                         | 1.0           | 210                                          | -51° to +51°; 3°  | 0.6/1.0        | 53               | 29                 | 104                | 1          | S131     |
| 124      | 100% load | <a href="#">46193</a> | Krios G2, K3, No      | 53Kx, 1.46 Å      | 6.0                                                         | 1.0           | 210                                          | -51° to +51°; 3°  | 0.6/1.0        | 78               | 29                 | 100                | 1          | S132     |
| 125      | 100% load | <a href="#">46194</a> | Krios G2, K3, No      | 53Kx, 1.46 Å      | 6.0                                                         | 1.0           | 210                                          | -51° to +51°; 3°  | 0.6/1.0        | 71               | 31                 | 150                | 2          | S133     |
| 126      | 100% load | <a href="#">46195</a> | Krios G2, K3, No      | 53Kx, 1.46 Å      | 6.0                                                         | 1.0           | 210                                          | -51° to +51°; 3°  | 0.6/1.0        | 85               | 28                 | 84                 | 1          | S134     |
| 127      | 100% load | <a href="#">46196</a> | Krios G2, K3, No      | 53Kx, 1.46 Å      | 6.0                                                         | 1.0           | 210                                          | -51° to +51°; 3°  | 0.6/1.0        | 81               | 29                 | 87                 | 1          | S135     |
| 128      | 100% load | <a href="#">46197</a> | Krios G2, K3, No      | 53Kx, 1.46 Å      | 6.0                                                         | 1.0           | 210                                          | -51° to +51°; 3°  | 0.6/1.0        | 78               | 30                 | 89                 | 1          | S136     |
| 129      | 100% load | <a href="#">46198</a> | Krios G2, K3, No      | 53Kx, 1.46 Å      | 6.0                                                         | 1.0           | 210                                          | -51° to +51°; 3°  | 0.6/1.0        | 98               | 30                 | 75                 | 2          | S137     |
| 130      | 100% load | <a href="#">46199</a> | Krios G2, K3, No      | 53Kx, 1.46 Å      | 6.0                                                         | 1.0           | 210                                          | -51° to +51°; 3°  | 0.6/1.0        | 80               | 28                 | 89                 | 1          | S138     |
| 131      | 100% load | <a href="#">46200</a> | Krios G2, K3, No      | 53Kx, 1.46 Å      | 6.0                                                         | 1.0           | 210                                          | -51° to +51°; 3°  | 0.6/1.0        | 73               | 28                 | 98                 | 1          | S139     |
| 132      | 100% load | <a href="#">46201</a> | Krios G2, K3, No      | 53Kx, 1.46 Å      | 6.0                                                         | 1.0           | 210                                          | -51° to +51°; 3°  | 0.6/1.0        | 61               | 29                 | 135                | 2          | S140     |
| 133      | 100% load | <a href="#">46202</a> | Krios G2, K3, No      | 53Kx, 1.46 Å      | 6.0                                                         | 1.0           | 210                                          | -51° to +51°; 3°  | 0.6/1.0        | 72               | 29                 | 74                 | 1          | S141     |
| 134      | 100% load | <a href="#">46203</a> | Krios G2, K3, No      | 53Kx, 1.46 Å      | 6.0                                                         | 1.0           | 210                                          | -51° to +51°; 3°  | 0.6/1.0        | 79               | 30                 | 76                 | 1          | S142     |
| 135      | 100% load | <a href="#">46204</a> | Krios G2, K3, No      | 53Kx, 1.46 Å      | 6.0                                                         | 1.0           | 210                                          | -51° to +51°; 3°  | 0.6/1.0        | 73               | 29                 | 73                 | 2          | S143     |
| 136      | 100% load | <a href="#">46205</a> | Krios G2, K3, No      | 53Kx, 1.46 Å      | 6.0                                                         | 1.0           | 210                                          | -51° to +51°; 3°  | 0.6/1.0        | 81               | 29                 | 105                | 1          | S144     |
| 137      | 100% load | <a href="#">46206</a> | Krios G2, K3, No      | 53Kx, 1.46 Å      | 6.0                                                         | 1.0           | 210                                          | -51° to +51°; 3°  | 0.6/1.0        | 88               | 30                 | 90                 | 1          | S145     |
| 138      | 100% load | <a href="#">46207</a> | Krios G2, K3, No      | 53Kx, 1.46 Å      | 6.0                                                         | 1.0           | 210                                          | -51° to +51°; 3°  | 0.6/1.0        | 83               | 31                 | 80                 | 1          | S146     |
| 139      | 100% load | <a href="#">46208</a> | Krios G2, K3, No      | 53Kx, 1.46 Å      | 6.0                                                         | 1.0           | 210                                          | -51° to +51°; 3°  | 0.6/1.0        | 79               | 32                 | 87                 | 1          | S147     |
| 140      | 100% load | <a href="#">46209</a> | Krios G2, K3, No      | 53Kx, 1.46 Å      | 6.0                                                         | 1.0           | 210                                          | -51° to +51°; 3°  | 0.6/1.0        | 87               | 31                 | 78                 | 1          | S148     |
| 141      | 100% load | <a href="#">46210</a> | Krios G2, K3, No      | 53Kx, 1.46 Å      | 6.0                                                         | 1.0           | 210                                          | -51° to +51°; 3°  | 0.6/1.0        | 72               | 29                 | 71                 | 1          | S149     |
| 142      | 100% load | <a href="#">46211</a> | Krios G2, K3, No      | 53Kx, 1.46 Å      | 6.0                                                         | 1.0           | 210                                          | -51° to +51°; 3°  | 0.6/1.0        | 74               | 32                 | 80                 | 1          | S150     |
| 143      | 100% load | <a href="#">46212</a> | Krios G2, K3, No      | 53Kx, 1.46 Å      | 6.0                                                         | 1.0           | 210                                          | -51° to +51°; 3°  | 0.6/1.0        | 78               | 29                 | 79                 | 1          | S151     |
| 144      | 100% load | <a href="#">46213</a> | Krios G2, K3, No      | 53Kx, 1.46 Å      | 6.0                                                         | 1.0           | 210                                          | -51° to +51°; 3°  | 0.6/1.0        | 80               | 31                 | 80                 | 1          | S152     |
| 145      | 100% load | <a href="#">46214</a> | Krios G2, K3, No      | 53Kx, 1.46 Å      | 6.0                                                         | 1.0           | 210                                          | -51° to +51°; 3°  | 0.6/1.0        | 77               | 29                 | 81                 | 1          | S153     |
| Part. ID | Sample    | EMDB ID               | TEM, camera, CDS mode | Mag. and Apix (Å) | Dose rate (e <sup>-</sup> Å <sup>-2</sup> s <sup>-1</sup> ) | Exp. time (s) | Total dose (e <sup>-</sup> Å <sup>-2</sup> ) | Angle range; step | Contour levels | Map-map FSC @0.5 | Map-map FSC @0.143 | Map-model FSC @0.5 | Ferritin # | Figure # |

|     |          |                       |                    |             |   |     |    |                  |         |    |    |     |   |      |
|-----|----------|-----------------------|--------------------|-------------|---|-----|----|------------------|---------|----|----|-----|---|------|
| 146 | 70% load | <a href="#">46215</a> | Zeiss 120, CCD, No | 80Kx, 1.48Å | - | 1.0 | 66 | -48° to +48°, 3° | 0.7/1.3 | 72 | 64 | 77  | 1 | S154 |
| 147 | 70% load | <a href="#">46216</a> | Zeiss 120, CCD, No | 80Kx, 1.48Å | - | 1.0 | 66 | -48° to +48°, 3° | 0.7/1.3 | 74 | 62 | 82  | 1 | S155 |
| 148 | 70% load | <a href="#">46217</a> | Zeiss 120, CCD, No | 80Kx, 1.48Å | - | 1.0 | 66 | -48° to +48°, 3° | 0.7/1.3 | 76 | 60 | 81  | 1 | S156 |
| 149 | 70% load | <a href="#">46218</a> | Zeiss 120, CCD, No | 80Kx, 1.48Å | - | 1.0 | 66 | -48° to +48°, 3° | 0.7/1.3 | 75 | 60 | 81  | 1 | S157 |
| 150 | 70% load | <a href="#">46219</a> | Zeiss 120, CCD, No | 80Kx, 1.48Å | - | 1.0 | 66 | -48° to +48°, 3° | 0.7/1.3 | 77 | 65 | 74  | 1 | S158 |
| 151 | 70% load | <a href="#">46220</a> | Zeiss 120, CCD, No | 80Kx, 1.48Å | - | 1.0 | 66 | -48° to +48°, 3° | 0.7/1.3 | 76 | 65 | 78  | 0 | S159 |
| 152 | 70% load | <a href="#">46221</a> | Zeiss 120, CCD, No | 80Kx, 1.48Å | - | 1.0 | 66 | -48° to +48°, 3° | 0.7/1.3 | 78 | 60 | 83  | 2 | S160 |
| 153 | 70% load | <a href="#">46222</a> | Zeiss 120, CCD, No | 80Kx, 1.48Å | - | 1.0 | 66 | -48° to +48°, 3° | 0.7/1.3 | 78 | 63 | 277 | 1 | S161 |
| 154 | 70% load | <a href="#">46223</a> | Zeiss 120, CCD, No | 80Kx, 1.48Å | - | 1.0 | 66 | -48° to +48°, 3° | 0.7/1.3 | 75 | 60 | 75  | 0 | S162 |
| 155 | 70% load | <a href="#">46224</a> | Zeiss 120, CCD, No | 80Kx, 1.48Å | - | 1.0 | 66 | -48° to +48°, 3° | 0.7/1.3 | 74 | 63 | 94  | 1 | S163 |
| 156 | 70% load | <a href="#">46225</a> | Zeiss 120, CCD, No | 80Kx, 1.48Å | - | 1.0 | 66 | -48° to +48°, 3° | 0.7/1.3 | 78 | 64 | 73  | 0 | S164 |
| 157 | 70% load | <a href="#">46226</a> | Zeiss 120, CCD, No | 80Kx, 1.48Å | - | 1.0 | 66 | -48° to +48°, 3° | 0.7/1.3 | 76 | 65 | 85  | 1 | S165 |
| 158 | 70% load | <a href="#">46227</a> | Zeiss 120, CCD, No | 80Kx, 1.48Å | - | 1.0 | 66 | -48° to +48°, 3° | 0.7/1.3 | 75 | 66 | 89  | 1 | S166 |
| 159 | 70% load | <a href="#">46228</a> | Zeiss 120, CCD, No | 80Kx, 1.48Å | - | 1.0 | 66 | -48° to +48°, 3° | 0.7/1.3 | 73 | 62 | 75  | 1 | S167 |
| 160 | 70% load | <a href="#">46229</a> | Zeiss 120, CCD, No | 80Kx, 1.48Å | - | 1.0 | 66 | -48° to +48°, 3° | 0.7/1.3 | 75 | 64 | 71  | 1 | S168 |
| 161 | 70% load | <a href="#">46230</a> | Zeiss 120, CCD, No | 80Kx, 1.48Å | - | 1.0 | 66 | -48° to +48°, 3° | 0.7/1.3 | 72 | 57 | 84  | 1 | S169 |
| 162 | 70% load | <a href="#">46231</a> | Zeiss 120, CCD, No | 80Kx, 1.48Å | - | 1.0 | 66 | -48° to +48°, 3° | 0.7/1.3 | 77 | 61 | 91  | 1 | S170 |
| 163 | 70% load | <a href="#">46232</a> | Zeiss 120, CCD, No | 80Kx, 1.48Å | - | 1.0 | 66 | -48° to +48°, 3° | 0.7/1.3 | 77 | 63 | 74  | 1 | S171 |
| 164 | 70% load | <a href="#">46233</a> | Zeiss 120, CCD, No | 80Kx, 1.48Å | - | 1.0 | 66 | -48° to +48°, 3° | 0.7/1.3 | 78 | 64 | 81  | 1 | S172 |
| 165 | 70% load | <a href="#">46234</a> | Zeiss 120, CCD, No | 80Kx, 1.48Å | - | 1.0 | 66 | -48° to +48°, 3° | 0.7/1.3 | 71 | 55 | 80  | 1 | S173 |
| 166 | 70% load | <a href="#">46235</a> | Zeiss 120, CCD, No | 80Kx, 1.48Å | - | 1.0 | 66 | -48° to +48°, 3° | 0.7/1.3 | 75 | 62 | 77  | 1 | S174 |
| 167 | 70% load | <a href="#">46236</a> | Zeiss 120, CCD, No | 80Kx, 1.48Å | - | 1.0 | 66 | -48° to +48°, 3° | 0.7/1.3 | 79 | 62 | 81  | 1 | S175 |
| 168 | 70% load | <a href="#">46237</a> | Zeiss 120, CCD, No | 80Kx, 1.48Å | - | 1.0 | 66 | -48° to +48°, 3° | 0.7/1.3 | 74 | 64 | 75  | 1 | S176 |
| 169 | 70% load | <a href="#">46238</a> | Zeiss 120, CCD, No | 80Kx, 1.48Å | - | 1.0 | 66 | -48° to +48°, 3° | 0.7/1.3 | 75 | 57 | 81  | 1 | S177 |
| 170 | 70% load | <a href="#">46239</a> | Zeiss 120, CCD, No | 80Kx, 1.48Å | - | 1.0 | 66 | -48° to +48°, 3° | 0.7/1.3 | 80 | 67 | 79  | 0 | S178 |
| 171 | 70% load | <a href="#">46240</a> | Zeiss 120, CCD, No | 80Kx, 1.48Å | - | 1.0 | 66 | -48° to +48°, 3° | 0.7/1.3 | 78 | 69 | 93  | 1 | S179 |
| 172 | 70% load | <a href="#">46241</a> | Zeiss 120, CCD, No | 80Kx, 1.48Å | - | 1.0 | 66 | -48° to +48°, 3° | 0.7/1.3 | 81 | 59 | 82  | 0 | S180 |
| 173 | 70% load | <a href="#">46242</a> | Zeiss 120, CCD, No | 80Kx, 1.48Å | - | 1.0 | 66 | -48° to +48°, 3° | 0.7/1.3 | 82 | 65 | 80  | 1 | S181 |
| 174 | 70% load | <a href="#">46243</a> | Zeiss 120, CCD, No | 80Kx, 1.48Å | - | 1.0 | 66 | -48° to +48°, 3° | 0.7/1.3 | 83 | 70 | 73  | 1 | S182 |
| 175 | 70% load | <a href="#">46244</a> | Zeiss 120, CCD, No | 80Kx, 1.48Å | - | 1.0 | 66 | -48° to +48°, 3° | 0.7/1.3 | 77 | 68 | 89  | 1 | S183 |
| 176 | 70% load | <a href="#">46245</a> | Zeiss 120, CCD, No | 80Kx, 1.48Å | - | 1.0 | 66 | -48° to +48°, 3° | 0.7/1.3 | 75 | 61 | 157 | 1 | S184 |
| 177 | 70% load | <a href="#">46246</a> | Zeiss 120, CCD, No | 80Kx, 1.48Å | - | 1.0 | 66 | -48° to +48°, 3° | 0.7/1.3 | 79 | 67 | 77  | 1 | S185 |
| 178 | 70% load | <a href="#">46247</a> | Zeiss 120, CCD, No | 80Kx, 1.48Å | - | 1.0 | 66 | -48° to +48°, 3° | 0.7/1.3 | 77 | 66 | 75  | 0 | S186 |
| 179 | 70% load | <a href="#">46248</a> | Zeiss 120, CCD, No | 80Kx, 1.48Å | - | 1.0 | 66 | -48° to +48°, 3° | 0.7/1.3 | 75 | 64 | 85  | 1 | S187 |
| 180 | 70% load | <a href="#">46249</a> | Zeiss 120, CCD, No | 80Kx, 1.48Å | - | 1.0 | 66 | -48° to +48°, 3° | 0.7/1.3 | 79 | 65 | 79  | 0 | S188 |
| 181 | 70% load | <a href="#">46250</a> | Zeiss 120, CCD, No | 80Kx, 1.48Å | - | 1.0 | 66 | -48° to +48°, 3° | 0.7/1.3 | 79 | 64 | 82  | 1 | S189 |
| 182 | 70% load | <a href="#">46251</a> | Zeiss 120, CCD, No | 80Kx, 1.48Å | - | 1.0 | 66 | -48° to +48°, 3° | 0.7/1.3 | 76 | 65 | 80  | 1 | S190 |
| 183 | 70% load | <a href="#">46252</a> | Zeiss 120, CCD, No | 80Kx, 1.48Å | - | 1.0 | 66 | -48° to +48°, 3° | 0.7/1.3 | 81 | 64 | 79  | 1 | S191 |
| 184 | 70% load | <a href="#">46253</a> | Zeiss 120, CCD, No | 80Kx, 1.48Å | - | 1.0 | 66 | -48° to +48°, 3° | 0.7/1.3 | 77 | 66 | 73  | 1 | S192 |
| 185 | 70% load | <a href="#">46254</a> | Zeiss 120, CCD, No | 80Kx, 1.48Å | - | 1.0 | 66 | -48° to +48°, 3° | 0.7/1.3 | 75 | 63 | 82  | 1 | S193 |
| 186 | 70% load | <a href="#">46255</a> | Zeiss 120, CCD, No | 80Kx, 1.48Å | - | 1.0 | 66 | -48° to +48°, 3° | 0.7/1.3 | 74 | 63 | 73  | 1 | S194 |
| 187 | 70% load | <a href="#">46256</a> | Zeiss 120, CCD, No | 80Kx, 1.48Å | - | 1.0 | 66 | -48° to +48°, 3° | 0.7/1.3 | 79 | 65 | 79  | 1 | S195 |
| 188 | 70% load | <a href="#">46257</a> | Zeiss 120, CCD, No | 80Kx, 1.48Å | - | 1.0 | 66 | -48° to +48°, 3° | 0.7/1.3 | 79 | 56 | 75  | 1 | S196 |
| 189 | 70% load | <a href="#">46258</a> | Zeiss 120, CCD, No | 80Kx, 1.48Å | - | 1.0 | 66 | -48° to +48°, 3° | 0.7/1.3 | 74 | 65 | 128 | 1 | S197 |
| 190 | 70% load | <a href="#">46259</a> | Zeiss 120, CCD, No | 80Kx, 1.48Å | - | 1.0 | 66 | -48° to +48°, 3° | 0.7/1.3 | 70 | 46 | 133 | 2 | S198 |
| 191 | 70% load | <a href="#">46260</a> | Zeiss 120, CCD, No | 80Kx, 1.48Å | - | 1.0 | 66 | -48° to +48°, 3° | 0.7/1.3 | 75 | 62 | 78  | 1 | S199 |
| 192 | 70% load | <a href="#">46261</a> | Zeiss 120, CCD, No | 80Kx, 1.48Å | - | 1.0 | 66 | -48° to +48°, 3° | 0.7/1.3 | 78 | 56 | 81  | 2 | S200 |
| 193 | 70% load | <a href="#">46262</a> | Zeiss 120, CCD, No | 80Kx, 1.48Å | - | 1.0 | 66 | -48° to +48°, 3° | 0.7/1.3 | 79 | 62 | 77  | 0 | S201 |
| 194 | 70% load | <a href="#">46263</a> | Zeiss 120, CCD, No | 80Kx, 1.48Å | - | 1.0 | 66 | -48° to +48°, 3° | 0.7/1.3 | 76 | 62 | 87  | 1 | S202 |
| 195 | 70% load | <a href="#">46264</a> | Zeiss 120, CCD, No | 80Kx, 1.48Å | - | 1.0 | 66 | -48° to +48°, 3° | 0.7/1.3 | 73 | 62 | 84  | 1 | S203 |
| 196 | 70% load | <a href="#">46265</a> | Zeiss 120, CCD, No | 80Kx, 1.48Å | - | 1.0 | 66 | -48° to +48°, 3° | 0.7/1.3 | 75 | 63 | 81  | 1 | S204 |

| 197      | 70% load | <a href="#">46266</a> | Zeiss 120, CCD, No    | 80Kx, 1.48Å       | -                                                           | 1.0           | 66                                           | -48° to +48°, 3°  | 0.7/1.3        | 78               | 63                 | 76                 | 1          | S205     |
|----------|----------|-----------------------|-----------------------|-------------------|-------------------------------------------------------------|---------------|----------------------------------------------|-------------------|----------------|------------------|--------------------|--------------------|------------|----------|
| 198      | 70% load | <a href="#">46267</a> | Zeiss 120, CCD, No    | 80Kx, 1.48Å       | -                                                           | 1.0           | 66                                           | -48° to +48°, 3°  | 0.7/1.3        | 76               | 67                 | 84                 | 1          | S206     |
| 199      | 70% load | <a href="#">46268</a> | Zeiss 120, CCD, No    | 80Kx, 1.48Å       | -                                                           | 1.0           | 66                                           | -48° to +48°, 3°  | 0.7/1.3        | 73               | 54                 | 82                 | 0          | S207     |
| 200      | 70% load | <a href="#">46269</a> | Zeiss 120, CCD, No    | 80Kx, 1.48Å       | -                                                           | 1.0           | 66                                           | -48° to +48°, 3°  | 0.7/1.3        | 75               | 57                 | 98                 | 1          | S208     |
| 201      | 70% load | <a href="#">46270</a> | Zeiss 120, CCD, No    | 80Kx, 1.48Å       | -                                                           | 1.0           | 66                                           | -48° to +48°, 3°  | 0.7/1.3        | 75               | 64                 | 92                 | 1          | S209     |
| 202      | 70% load | <a href="#">46271</a> | Zeiss 120, CCD, No    | 80Kx, 1.48Å       | -                                                           | 1.0           | 66                                           | -48° to +48°, 3°  | 0.7/1.3        | 77               | 58                 | 82                 | 0          | S210     |
| 203      | 70% load | <a href="#">46272</a> | Zeiss 120, CCD, No    | 80Kx, 1.48Å       | -                                                           | 1.0           | 66                                           | -48° to +48°, 3°  | 0.7/1.3        | 78               | 64                 | 80                 | 1          | S211     |
| 204      | 70% load | <a href="#">46273</a> | Zeiss 120, CCD, No    | 80Kx, 1.48Å       | -                                                           | 1.0           | 66                                           | -48° to +48°, 3°  | 0.7/1.3        | 78               | 57                 | 78                 | 1          | S212     |
| 205      | 70% load | <a href="#">46274</a> | Zeiss 120, CCD, No    | 80Kx, 1.48Å       | -                                                           | 1.0           | 66                                           | -48° to +48°, 3°  | 0.7/1.3        | 77               | 56                 | 78                 | 1          | S213     |
| 206      | 70% load | <a href="#">46275</a> | Zeiss 120, CCD, No    | 80Kx, 1.48Å       | -                                                           | 1.0           | 66                                           | -48° to +48°, 3°  | 0.7/1.3        | 74               | 61                 | 76                 | 1          | S214     |
| 207      | 70% load | <a href="#">46276</a> | Zeiss 120, CCD, No    | 80Kx, 1.48Å       | -                                                           | 1.0           | 66                                           | -48° to +48°, 3°  | 0.7/1.3        | 78               | 64                 | 77                 | 1          | S215     |
| 208      | 70% load | <a href="#">46277</a> | Zeiss 120, CCD, No    | 80Kx, 1.48Å       | -                                                           | 1.0           | 66                                           | -48° to +48°, 3°  | 0.7/1.3        | 77               | 63                 | 82                 | 1          | S216     |
| 209      | 70% load | <a href="#">46278</a> | Zeiss 120, CCD, No    | 80Kx, 1.48Å       | -                                                           | 1.0           | 66                                           | -48° to +48°, 3°  | 0.7/1.3        | 75               | 66                 | 76                 | 0          | S217     |
| 210      | 70% load | <a href="#">46279</a> | Zeiss 120, CCD, No    | 80Kx, 1.48Å       | -                                                           | 1.0           | 66                                           | -48° to +48°, 3°  | 0.7/1.3        | 74               | 59                 | 80                 | 0          | S218     |
| 211      | 70% load | <a href="#">46280</a> | Zeiss 120, CCD, No    | 80Kx, 1.48Å       | -                                                           | 1.0           | 66                                           | -48° to +48°, 3°  | 0.7/1.3        | 88               | 62                 | 82                 | 1          | S219     |
| 212      | 70% load | <a href="#">46281</a> | Zeiss 120, CCD, No    | 80Kx, 1.48Å       | -                                                           | 1.0           | 66                                           | -48° to +48°, 3°  | 0.7/1.3        | 85               | 64                 | 91                 | 1          | S220     |
| 213      | 70% load | <a href="#">46282</a> | Zeiss 120, CCD, No    | 80Kx, 1.48Å       | -                                                           | 1.0           | 66                                           | -48° to +48°, 3°  | 0.7/1.3        | 81               | 53                 | 141                | 1          | S221     |
| 214      | 70% load | <a href="#">46283</a> | Zeiss 120, CCD, No    | 80Kx, 1.48Å       | -                                                           | 1.0           | 66                                           | -48° to +48°, 3°  | 0.7/1.3        | 81               | 69                 | 77                 | 1          | S222     |
| 215      | 70% load | <a href="#">46284</a> | Zeiss 120, CCD, No    | 80Kx, 1.48Å       | -                                                           | 1.0           | 66                                           | -48° to +48°, 3°  | 0.7/1.3        | 78               | 67                 | 79                 | 1          | S223     |
| Part. ID | Sample   | EMDB ID               | TEM, camera, CDS mode | Mag. and Apix (Å) | Dose rate (e <sup>-</sup> Å <sup>-2</sup> s <sup>-1</sup> ) | Exp. time (s) | Total dose (e <sup>-</sup> Å <sup>-2</sup> ) | Angle range; step | Contour levels | Map-map FSC @0.5 | Map-map FSC @0.143 | Map-model FSC @0.5 | Ferritin # | Figure # |
| 216      | 0% load  | <a href="#">46285</a> | Krios G2, K3, No      | 53Kx, 1.46 Å      | 6.0                                                         | 1.0           | 210                                          | -51° to +51°, 3°  | 0.6/1.0        | 69               | 28                 | 79                 | 0          | S224     |
| 217      | 0% load  | <a href="#">46286</a> | Krios G2, K3, No      | 53Kx, 1.46 Å      | 6.0                                                         | 1.0           | 210                                          | -51° to +51°, 3°  | 0.6/1.0        | 73               | 27                 | 73                 | 0          | S225     |
| 218      | 0% load  | <a href="#">46287</a> | Krios G2, K3, No      | 53Kx, 1.46 Å      | 6.0                                                         | 1.0           | 210                                          | -51° to +51°, 3°  | 0.6/1.0        | 72               | 27                 | 84                 | 0          | S226     |
| 219      | 0% load  | <a href="#">46288</a> | Krios G2, K3, No      | 53Kx, 1.46 Å      | 6.0                                                         | 1.0           | 210                                          | -51° to +51°, 3°  | 0.6/1.0        | 79               | 29                 | 77                 | 0          | S227     |
| 220      | 0% load  | <a href="#">46289</a> | Krios G2, K3, No      | 53Kx, 1.46 Å      | 6.0                                                         | 1.0           | 210                                          | -51° to +51°, 3°  | 0.6/1.0        | 74               | 27                 | 79                 | 0          | S228     |
| 221      | 0% load  | <a href="#">46290</a> | Krios G2, K3, No      | 53Kx, 1.46 Å      | 6.0                                                         | 1.0           | 210                                          | -51° to +51°, 3°  | 0.6/1.0        | 74               | 26                 | 75                 | 0          | S229     |
| 222      | 0% load  | <a href="#">46291</a> | Krios G2, K3, No      | 53Kx, 1.46 Å      | 6.0                                                         | 1.0           | 210                                          | -51° to +51°, 3°  | 0.6/1.0        | 69               | 28                 | 77                 | 0          | S230     |
| 223      | 0% load  | <a href="#">46292</a> | Krios G2, K3, No      | 53Kx, 1.46 Å      | 6.0                                                         | 1.0           | 210                                          | -51° to +51°, 3°  | 0.6/1.0        | 73               | 25                 | 78                 | 0          | S231     |
| 224      | 0% load  | <a href="#">46293</a> | Krios G2, K3, No      | 53Kx, 1.46 Å      | 6.0                                                         | 1.0           | 210                                          | -51° to +51°, 3°  | 0.6/1.0        | 97               | 75                 | 74                 | 0          | S232     |
| 225      | 0% load  | <a href="#">46294</a> | Krios G2, K3, No      | 53Kx, 1.46 Å      | 6.0                                                         | 1.0           | 210                                          | -51° to +51°, 3°  | 0.6/1.0        | 82               | 32                 | 76                 | 0          | S233     |
| 226      | 0% load  | <a href="#">46295</a> | Krios G2, K3, No      | 53Kx, 1.46 Å      | 6.0                                                         | 1.0           | 210                                          | -51° to +51°, 3°  | 0.6/1.0        | 84               | 28                 | 79                 | 0          | S234     |
| 227      | 0% load  | <a href="#">46296</a> | Krios G2, K3, No      | 53Kx, 1.46 Å      | 6.0                                                         | 1.0           | 210                                          | -51° to +51°, 3°  | 0.6/1.0        | 77               | 27                 | 76                 | 0          | S235     |
| 228      | 0% load  | <a href="#">46297</a> | Krios G2, K3, No      | 53Kx, 1.46 Å      | 6.0                                                         | 1.0           | 210                                          | -51° to +51°, 3°  | 0.6/1.0        | 72               | 25                 | 75                 | 0          | S236     |
| 229      | 0% load  | <a href="#">46298</a> | Krios G2, K3, No      | 53Kx, 1.46 Å      | 6.0                                                         | 1.0           | 210                                          | -51° to +51°, 3°  | 0.6/1.0        | 73               | 25                 | 81                 | 0          | S237     |
| 230      | 0% load  | <a href="#">46299</a> | Krios G2, K3, No      | 53Kx, 1.46 Å      | 6.0                                                         | 1.0           | 210                                          | -51° to +51°, 3°  | 0.6/1.0        | 75               | 27                 | 76                 | 0          | S238     |
| 231      | 0% load  | <a href="#">46300</a> | Krios G2, K3, No      | 53Kx, 1.46 Å      | 6.0                                                         | 1.0           | 210                                          | -51° to +51°, 3°  | 0.6/1.0        | 72               | 27                 | 76                 | 0          | S239     |
| 232      | 0% load  | <a href="#">46301</a> | Krios G2, K3, No      | 53Kx, 1.46 Å      | 6.0                                                         | 1.0           | 210                                          | -51° to +51°, 3°  | 0.6/1.0        | 69               | 29                 | 75                 | 0          | S240     |
| 233      | 0% load  | <a href="#">46302</a> | Krios G2, K3, No      | 53Kx, 1.46 Å      | 6.0                                                         | 1.0           | 210                                          | -51° to +51°, 3°  | 0.6/1.0        | 74               | 27                 | 77                 | 0          | S241     |
| 234      | 0% load  | <a href="#">46303</a> | Krios G2, K3, No      | 53Kx, 1.46 Å      | 6.0                                                         | 1.0           | 210                                          | -51° to +51°, 3°  | 0.6/1.0        | 78               | 27                 | 79                 | 0          | S242     |
| 235      | 0% load  | <a href="#">46304</a> | Krios G2, K3, No      | 53Kx, 1.46 Å      | 6.0                                                         | 1.0           | 210                                          | -51° to +51°, 3°  | 0.6/1.0        | 78               | 27                 | 79                 | 0          | S243     |
| 236      | 0% load  | <a href="#">46305</a> | Krios G2, K3, No      | 53Kx, 1.46 Å      | 6.0                                                         | 1.0           | 210                                          | -51° to +51°, 3°  | 0.6/1.0        | 74               | 28                 | 75                 | 0          | S244     |
| 237      | 0% load  | <a href="#">46306</a> | Krios G2, K3, No      | 53Kx, 1.46 Å      | 6.0                                                         | 1.0           | 210                                          | -51° to +51°, 3°  | 0.6/1.0        | 72               | 26                 | 77                 | 0          | S245     |
| 238      | 0% load  | <a href="#">46307</a> | Krios G2, K3, No      | 53Kx, 1.46 Å      | 6.0                                                         | 1.0           | 210                                          | -51° to +51°, 3°  | 0.6/1.0        | 77               | 28                 | 76                 | 0          | S246     |
| 239      | 0% load  | <a href="#">46308</a> | Krios G2, K3, No      | 53Kx, 1.46 Å      | 6.0                                                         | 1.0           | 210                                          | -51° to +51°, 3°  | 0.6/1.0        | 80               | 29                 | 77                 | 0          | S247     |
| 240      | 0% load  | <a href="#">46309</a> | Krios G2, K3, No      | 53Kx, 1.46 Å      | 6.0                                                         | 1.0           | 210                                          | -51° to +51°, 3°  | 0.6/1.0        | 78               | 28                 | 76                 | 0          | S248     |
| 241      | 0% load  | <a href="#">46310</a> | Krios G2, K3, No      | 53Kx, 1.46 Å      | 6.0                                                         | 1.0           | 210                                          | -51° to +51°, 3°  | 0.6/1.0        | 75               | 28                 | 74                 | 0          | S249     |
| 242      | 0% load  | <a href="#">46311</a> | Krios G2, K3, No      | 53Kx, 1.46 Å      | 6.0                                                         | 1.0           | 210                                          | -51° to +51°, 3°  | 0.6/1.0        | 72               | 28                 | 82                 | 0          | S250     |
| 243      | 0% load  | <a href="#">46312</a> | Krios G2, K3, No      | 53Kx, 1.46 Å      | 6.0                                                         | 1.0           | 210                                          | -51° to +51°, 3°  | 0.6/1.0        | 69               | 27                 | 80                 | 0          | S251     |
| 244      | 0% load  | <a href="#">46313</a> | Krios G2, K3, No      | 53Kx, 1.46 Å      | 6.0                                                         | 1.0           | 210                                          | -51° to +51°, 3°  | 0.6/1.0        | 75               | 27                 | 80                 | 0          | S252     |



|     |         |                       |                  |              |     |     |     |                  |         |    |    |    |   |      |
|-----|---------|-----------------------|------------------|--------------|-----|-----|-----|------------------|---------|----|----|----|---|------|
| 245 | 0% load | <a href="#">46314</a> | Krios G2, K3, No | 53Kx, 1.46 Å | 6.0 | 1.0 | 210 | -51° to +51°; 3° | 0.6/1.0 | 93 | 70 | 86 | 0 | S253 |
| 246 | 0% load | <a href="#">46315</a> | Krios G2, K3, No | 53Kx, 1.46 Å | 6.0 | 1.0 | 210 | -51° to +51°; 3° | 0.6/1.0 | 77 | 28 | 77 | 0 | S254 |
| 247 | 0% load | <a href="#">46316</a> | Krios G2, K3, No | 53Kx, 1.46 Å | 6.0 | 1.0 | 210 | -51° to +51°; 3° | 0.6/1.0 | 75 | 29 | 72 | 0 | S255 |
| 248 | 0% load | <a href="#">46317</a> | Krios G2, K3, No | 53Kx, 1.46 Å | 6.0 | 1.0 | 210 | -51° to +51°; 3° | 0.6/1.0 | 74 | 27 | 74 | 0 | S256 |
| 249 | 0% load | <a href="#">46318</a> | Krios G2, K3, No | 53Kx, 1.46 Å | 6.0 | 1.0 | 210 | -51° to +51°; 3° | 0.6/1.0 | 77 | 26 | 75 | 0 | S257 |
| 250 | 0% load | <a href="#">46319</a> | Krios G2, K3, No | 53Kx, 1.46 Å | 6.0 | 1.0 | 210 | -51° to +51°; 3° | 0.6/1.0 | 83 | 28 | 79 | 0 | S258 |
| 251 | 0% load | <a href="#">46320</a> | Krios G2, K3, No | 53Kx, 1.46 Å | 6.0 | 1.0 | 210 | -51° to +51°; 3° | 0.6/1.0 | 81 | 28 | 74 | 0 | S259 |
| 252 | 0% load | <a href="#">46321</a> | Krios G2, K3, No | 53Kx, 1.46 Å | 6.0 | 1.0 | 210 | -51° to +51°; 3° | 0.6/1.0 | 83 | 27 | 75 | 0 | S260 |
| 253 | 0% load | <a href="#">46322</a> | Krios G2, K3, No | 53Kx, 1.46 Å | 6.0 | 1.0 | 210 | -51° to +51°; 3° | 0.6/1.0 | 77 | 27 | 78 | 0 | S261 |
| 254 | 0% load | <a href="#">46323</a> | Krios G2, K3, No | 53Kx, 1.46 Å | 6.0 | 1.0 | 210 | -51° to +51°; 3° | 0.6/1.0 | 77 | 28 | 79 | 0 | S262 |
| 255 | 0% load | <a href="#">46324</a> | Krios G2, K3, No | 53Kx, 1.46 Å | 6.0 | 1.0 | 210 | -51° to +51°; 3° | 0.6/1.0 | 93 | 63 | 84 | 0 | S263 |
| 256 | 0% load | <a href="#">46325</a> | Krios G2, K3, No | 53Kx, 1.46 Å | 6.0 | 1.0 | 210 | -51° to +51°; 3° | 0.6/1.0 | 77 | 29 | 82 | 0 | S264 |
| 257 | 0% load | <a href="#">46326</a> | Krios G2, K3, No | 53Kx, 1.46 Å | 6.0 | 1.0 | 210 | -51° to +51°; 3° | 0.6/1.0 | 77 | 30 | 76 | 0 | S265 |
| 258 | 0% load | <a href="#">46327</a> | Krios G2, K3, No | 53Kx, 1.46 Å | 6.0 | 1.0 | 210 | -51° to +51°; 3° | 0.6/1.0 | 73 | 26 | 74 | 0 | S266 |
| 259 | 0% load | <a href="#">46328</a> | Krios G2, K3, No | 53Kx, 1.46 Å | 6.0 | 1.0 | 210 | -51° to +51°; 3° | 0.6/1.0 | 72 | 27 | 77 | 0 | S267 |
| 260 | 0% load | <a href="#">46329</a> | Krios G2, K3, No | 53Kx, 1.46 Å | 6.0 | 1.0 | 210 | -51° to +51°; 3° | 0.6/1.0 | 76 | 27 | 79 | 0 | S268 |
| 261 | 0% load | <a href="#">46330</a> | Krios G2, K3, No | 53Kx, 1.46 Å | 6.0 | 1.0 | 210 | -51° to +51°; 3° | 0.6/1.0 | 75 | 27 | 78 | 0 | S269 |
| 262 | 0% load | <a href="#">46331</a> | Krios G2, K3, No | 53Kx, 1.46 Å | 6.0 | 1.0 | 210 | -51° to +51°; 3° | 0.6/1.0 | 73 | 27 | 78 | 0 | S270 |
| 263 | 0% load | <a href="#">46332</a> | Krios G2, K3, No | 53Kx, 1.46 Å | 6.0 | 1.0 | 210 | -51° to +51°; 3° | 0.6/1.0 | 72 | 27 | 78 | 0 | S271 |
| 264 | 0% load | <a href="#">46333</a> | Krios G2, K3, No | 53Kx, 1.46 Å | 6.0 | 1.0 | 210 | -51° to +51°; 3° | 0.6/1.0 | 85 | 29 | 76 | 0 | S272 |
| 265 | 0% load | <a href="#">46334</a> | Krios G2, K3, No | 53Kx, 1.46 Å | 6.0 | 1.0 | 210 | -51° to +51°; 3° | 0.6/1.0 | 71 | 27 | 78 | 0 | S273 |
| 266 | 0% load | <a href="#">46335</a> | Krios G2, K3, No | 53Kx, 1.46 Å | 6.0 | 1.0 | 210 | -51° to +51°; 3° | 0.6/1.0 | 75 | 27 | 77 | 0 | S274 |
| 267 | 0% load | <a href="#">46336</a> | Krios G2, K3, No | 53Kx, 1.46 Å | 6.0 | 1.0 | 210 | -51° to +51°; 3° | 0.6/1.0 | 78 | 27 | 79 | 0 | S275 |
| 268 | 0% load | <a href="#">46337</a> | Krios G2, K3, No | 53Kx, 1.46 Å | 6.0 | 1.0 | 210 | -51° to +51°; 3° | 0.6/1.0 | 77 | 27 | 77 | 0 | S276 |
| 269 | 0% load | <a href="#">46338</a> | Krios G2, K3, No | 53Kx, 1.46 Å | 6.0 | 1.0 | 210 | -51° to +51°; 3° | 0.6/1.0 | 73 | 28 | 80 | 0 | S277 |
| 270 | 0% load | <a href="#">46339</a> | Krios G2, K3, No | 53Kx, 1.46 Å | 6.0 | 1.0 | 210 | -51° to +51°; 3° | 0.6/1.0 | 72 | 26 | 78 | 0 | S278 |
| 271 | 0% load | <a href="#">46340</a> | Krios G2, K3, No | 53Kx, 1.46 Å | 6.0 | 1.0 | 210 | -51° to +51°; 3° | 0.6/1.0 | 70 | 28 | 74 | 0 | S279 |
| 272 | 0% load | <a href="#">46341</a> | Krios G2, K3, No | 53Kx, 1.46 Å | 6.0 | 1.0 | 210 | -51° to +51°; 3° | 0.6/1.0 | 80 | 29 | 80 | 0 | S280 |
| 273 | 0% load | <a href="#">46342</a> | Krios G2, K3, No | 53Kx, 1.46 Å | 6.0 | 1.0 | 210 | -51° to +51°; 3° | 0.6/1.0 | 77 | 26 | 74 | 0 | S281 |
| 274 | 0% load | <a href="#">46343</a> | Krios G2, K3, No | 53Kx, 1.46 Å | 6.0 | 1.0 | 210 | -51° to +51°; 3° | 0.6/1.0 | 78 | 26 | 76 | 0 | S282 |
| 275 | 0% load | <a href="#">46344</a> | Krios G2, K3, No | 53Kx, 1.46 Å | 6.0 | 1.0 | 210 | -51° to +51°; 3° | 0.6/1.0 | 77 | 27 | 76 | 0 | S283 |
| 276 | 0% load | <a href="#">46345</a> | Krios G2, K3, No | 53Kx, 1.46 Å | 6.0 | 1.0 | 210 | -51° to +51°; 3° | 0.6/1.0 | 74 | 29 | 73 | 0 | S284 |
| 277 | 0% load | <a href="#">46346</a> | Krios G2, K3, No | 53Kx, 1.46 Å | 6.0 | 1.0 | 210 | -51° to +51°; 3° | 0.6/1.0 | 70 | 27 | 74 | 0 | S285 |
| 278 | 0% load | <a href="#">46347</a> | Krios G2, K3, No | 53Kx, 1.46 Å | 6.0 | 1.0 | 210 | -51° to +51°; 3° | 0.6/1.0 | 71 | 28 | 77 | 0 | S286 |
| 279 | 0% load | <a href="#">46348</a> | Krios G2, K3, No | 53Kx, 1.46 Å | 6.0 | 1.0 | 210 | -51° to +51°; 3° | 0.6/1.0 | 79 | 27 | 79 | 0 | S287 |
| 280 | 0% load | <a href="#">46349</a> | Krios G2, K3, No | 53Kx, 1.46 Å | 6.0 | 1.0 | 210 | -51° to +51°; 3° | 0.6/1.0 | 78 | 29 | 82 | 0 | S288 |
| 281 | 0% load | <a href="#">46350</a> | Krios G2, K3, No | 53Kx, 1.46 Å | 6.0 | 1.0 | 210 | -51° to +51°; 3° | 0.6/1.0 | 72 | 27 | 82 | 0 | S289 |
| 282 | 0% load | <a href="#">46351</a> | Krios G2, K3, No | 53Kx, 1.46 Å | 6.0 | 1.0 | 210 | -51° to +51°; 3° | 0.6/1.0 | 63 | 27 | 77 | 0 | S290 |
| 283 | 0% load | <a href="#">46352</a> | Krios G2, K3, No | 53Kx, 1.46 Å | 6.0 | 1.0 | 210 | -51° to +51°; 3° | 0.6/1.0 | 66 | 27 | 73 | 0 | S291 |
| 284 | 0% load | <a href="#">46353</a> | Krios G2, K3, No | 53Kx, 1.46 Å | 6.0 | 1.0 | 210 | -51° to +51°; 3° | 0.6/1.0 | 77 | 29 | 73 | 0 | S292 |
| 285 | 0% load | <a href="#">46354</a> | Krios G2, K3, No | 53Kx, 1.46 Å | 6.0 | 1.0 | 210 | -51° to +51°; 3° | 0.6/1.0 | 84 | 25 | 78 | 0 | S293 |
| 286 | 0% load | <a href="#">46355</a> | Krios G2, K3, No | 53Kx, 1.46 Å | 6.0 | 1.0 | 210 | -51° to +51°; 3° | 0.6/1.0 | 86 | 29 | 83 | 0 | S294 |
| 287 | 0% load | <a href="#">46356</a> | Krios G2, K3, No | 53Kx, 1.46 Å | 6.0 | 1.0 | 210 | -51° to +51°; 3° | 0.6/1.0 | 72 | 28 | 75 | 0 | S295 |
| 288 | 0% load | <a href="#">46357</a> | Krios G2, K3, No | 53Kx, 1.46 Å | 6.0 | 1.0 | 210 | -51° to +51°; 3° | 0.6/1.0 | 79 | 28 | 76 | 0 | S296 |
| 289 | 0% load | <a href="#">46358</a> | Krios G2, K3, No | 53Kx, 1.46 Å | 6.0 | 1.0 | 210 | -51° to +51°; 3° | 0.6/1.0 | 80 | 27 | 79 | 0 | S297 |
| 290 | 0% load | <a href="#">46359</a> | Krios G2, K3, No | 53Kx, 1.46 Å | 6.0 | 1.0 | 210 | -51° to +51°; 3° | 0.6/1.0 | 84 | 26 | 79 | 0 | S298 |
| 291 | 0% load | <a href="#">46360</a> | Krios G2, K3, No | 53Kx, 1.46 Å | 6.0 | 1.0 | 210 | -51° to +51°; 3° | 0.6/1.0 | 79 | 27 | 76 | 0 | S299 |
| 292 | 0% load | <a href="#">46361</a> | Krios G2, K3, No | 53Kx, 1.46 Å | 6.0 | 1.0 | 210 | -51° to +51°; 3° | 0.6/1.0 | 69 | 27 | 74 | 0 | S300 |
| 293 | 0% load | <a href="#">46362</a> | Krios G2, K3, No | 53Kx, 1.46 Å | 6.0 | 1.0 | 210 | -51° to +51°; 3° | 0.6/1.0 | 80 | 28 | 83 | 0 | S301 |
| 294 | 0% load | <a href="#">46363</a> | Krios G2, K3, No | 53Kx, 1.46 Å | 6.0 | 1.0 | 210 | -51° to +51°; 3° | 0.6/1.0 | 76 | 29 | 80 | 0 | S302 |
| 295 | 0% load | <a href="#">46364</a> | Krios G2, K3, No | 53Kx, 1.46 Å | 6.0 | 1.0 | 210 | -51° to +51°; 3° | 0.6/1.0 | 89 | 76 | 87 | 0 | S303 |

| 296      | 0% load | <a href="#">46365</a> | Krios G2, K3, No      | 53Kx, 1.46 Å      | 6.0                                                         | 1.0           | 210                                          | -51° to +51°; 3°  | 0.6/1.0        | 69               | 33                 | 83                 | 0          | S304     |
|----------|---------|-----------------------|-----------------------|-------------------|-------------------------------------------------------------|---------------|----------------------------------------------|-------------------|----------------|------------------|--------------------|--------------------|------------|----------|
| 297      | 0% load | <a href="#">46366</a> | Krios G2, K3, No      | 53Kx, 1.46 Å      | 6.0                                                         | 1.0           | 210                                          | -51° to +51°; 3°  | 0.6/1.0        | 78               | 29                 | 76                 | 0          | S305     |
| 298      | 0% load | <a href="#">46367</a> | Krios G2, K3, No      | 53Kx, 1.46 Å      | 6.0                                                         | 1.0           | 210                                          | -51° to +51°; 3°  | 0.6/1.0        | 72               | 26                 | 79                 | 0          | S306     |
| 299      | 0% load | <a href="#">46368</a> | Krios G2, K3, No      | 53Kx, 1.46 Å      | 6.0                                                         | 1.0           | 210                                          | -51° to +51°; 3°  | 0.6/1.0        | 61               | 27                 | 75                 | 0          | S307     |
| 300      | 0% load | <a href="#">46369</a> | Krios G2, K3, No      | 53Kx, 1.46 Å      | 6.0                                                         | 1.0           | 210                                          | -51° to +51°; 3°  | 0.6/1.0        | 73               | 28                 | 80                 | 0          | S308     |
| 301      | 0% load | <a href="#">46370</a> | Krios G2, K3, No      | 53Kx, 1.46 Å      | 6.0                                                         | 1.0           | 210                                          | -51° to +51°; 3°  | 0.6/1.0        | 71               | 26                 | 74                 | 0          | S309     |
| 302      | 0% load | <a href="#">46371</a> | Krios G2, K3, No      | 53Kx, 1.46 Å      | 6.0                                                         | 1.0           | 210                                          | -51° to +51°; 3°  | 0.6/1.0        | 81               | 28                 | 76                 | 0          | S310     |
| 303      | 0% load | <a href="#">46372</a> | Krios G2, K3, No      | 53Kx, 1.46 Å      | 6.0                                                         | 1.0           | 210                                          | -51° to +51°; 3°  | 0.6/1.0        | 71               | 29                 | 79                 | 0          | S311     |
| 304      | 0% load | <a href="#">46373</a> | Krios G2, K3, No      | 53Kx, 1.46 Å      | 6.0                                                         | 1.0           | 210                                          | -51° to +51°; 3°  | 0.6/1.0        | 86               | 34                 | 82                 | 0          | S312     |
| 305      | 0% load | <a href="#">46374</a> | Krios G2, K3, No      | 53Kx, 1.46 Å      | 6.0                                                         | 1.0           | 210                                          | -51° to +51°; 3°  | 0.6/1.0        | 75               | 26                 | 75                 | 0          | S313     |
| 306      | 0% load | <a href="#">46375</a> | Krios G2, K3, No      | 53Kx, 1.46 Å      | 6.0                                                         | 1.0           | 210                                          | -51° to +51°; 3°  | 0.6/1.0        | 71               | 28                 | 74                 | 0          | S314     |
| 307      | 0% load | <a href="#">46376</a> | Krios G2, K3, No      | 53Kx, 1.46 Å      | 6.0                                                         | 1.0           | 210                                          | -51° to +51°; 3°  | 0.6/1.0        | 78               | 26                 | 74                 | 0          | S315     |
| 308      | 0% load | <a href="#">46377</a> | Krios G2, K3, No      | 53Kx, 1.46 Å      | 6.0                                                         | 1.0           | 210                                          | -51° to +51°; 3°  | 0.6/1.0        | 78               | 29                 | 78                 | 0          | S316     |
| 309      | 0% load | <a href="#">46378</a> | Krios G2, K3, No      | 53Kx, 1.46 Å      | 6.0                                                         | 1.0           | 210                                          | -51° to +51°; 3°  | 0.6/1.0        | 73               | 27                 | 73                 | 0          | S317     |
| 310      | 0% load | <a href="#">46379</a> | Krios G2, K3, No      | 53Kx, 1.46 Å      | 6.0                                                         | 1.0           | 210                                          | -51° to +51°; 3°  | 0.6/1.0        | 69               | 30                 | 81                 | 0          | S318     |
| 311      | 0% load | <a href="#">46380</a> | Krios G2, K3, No      | 53Kx, 1.46 Å      | 6.0                                                         | 1.0           | 210                                          | -51° to +51°; 3°  | 0.6/1.0        | 72               | 27                 | 74                 | 0          | S319     |
| 312      | 0% load | <a href="#">46381</a> | Krios G2, K3, No      | 53Kx, 1.46 Å      | 6.0                                                         | 1.0           | 210                                          | -51° to +51°; 3°  | 0.6/1.0        | 91               | 28                 | 77                 | 0          | S320     |
| 313      | 0% load | <a href="#">46382</a> | Krios G2, K3, No      | 53Kx, 1.46 Å      | 6.0                                                         | 1.0           | 210                                          | -51° to +51°; 3°  | 0.6/1.0        | 77               | 26                 | 74                 | 0          | S321     |
| 314      | 0% load | <a href="#">46383</a> | Krios G2, K3, No      | 53Kx, 1.46 Å      | 6.0                                                         | 1.0           | 210                                          | -51° to +51°; 3°  | 0.6/1.0        | 73               | 63                 | 77                 | 0          | S322     |
| 315      | 0% load | <a href="#">46384</a> | Krios G2, K3, No      | 53Kx, 1.46 Å      | 6.0                                                         | 1.0           | 210                                          | -51° to +51°; 3°  | 0.6/1.0        | 74               | 27                 | 77                 | 0          | S323     |
| 316      | 0% load | <a href="#">46385</a> | Krios G2, K3, No      | 53Kx, 1.46 Å      | 6.0                                                         | 1.0           | 210                                          | -51° to +51°; 3°  | 0.6/1.0        | 76               | 30                 | 74                 | 0          | S324     |
| 317      | 0% load | <a href="#">46386</a> | Krios G2, K3, No      | 53Kx, 1.46 Å      | 6.0                                                         | 1.0           | 210                                          | -51° to +51°; 3°  | 0.6/1.0        | 73               | 26                 | 77                 | 0          | S325     |
| 318      | 0% load | <a href="#">46387</a> | Krios G2, K3, No      | 53Kx, 1.46 Å      | 6.0                                                         | 1.0           | 210                                          | -51° to +51°; 3°  | 0.6/1.0        | 71               | 29                 | 78                 | 0          | S326     |
| 319      | 0% load | <a href="#">46388</a> | Krios G2, K3, No      | 53Kx, 1.46 Å      | 6.0                                                         | 1.0           | 210                                          | -51° to +51°; 3°  | 0.6/1.0        | 109              | 73                 | 76                 | 0          | S327     |
| 320      | 0% load | <a href="#">46389</a> | Krios G2, K3, No      | 53Kx, 1.46 Å      | 6.0                                                         | 1.0           | 210                                          | -51° to +51°; 3°  | 0.6/1.0        | 69               | 28                 | 73                 | 0          | S328     |
| 321      | 0% load | <a href="#">46390</a> | Krios G2, K3, No      | 53Kx, 1.46 Å      | 6.0                                                         | 1.0           | 210                                          | -51° to +51°; 3°  | 0.6/1.0        | 79               | 27                 | 78                 | 0          | S329     |
| 322      | 0% load | <a href="#">46391</a> | Krios G2, K3, No      | 53Kx, 1.46 Å      | 6.0                                                         | 1.0           | 210                                          | -51° to +51°; 3°  | 0.6/1.0        | 78               | 28                 | 80                 | 0          | S330     |
| 323      | 0% load | <a href="#">46392</a> | Krios G2, K3, No      | 53Kx, 1.46 Å      | 6.0                                                         | 1.0           | 210                                          | -51° to +51°; 3°  | 0.6/1.0        | 77               | 28                 | 72                 | 0          | S331     |
| 324      | 0% load | <a href="#">46393</a> | Krios G2, K3, No      | 53Kx, 1.46 Å      | 6.0                                                         | 1.0           | 210                                          | -51° to +51°; 3°  | 0.6/1.0        | 81               | 26                 | 78                 | 0          | S332     |
| 325      | 0% load | <a href="#">46394</a> | Krios G2, K3, No      | 53Kx, 1.46 Å      | 6.0                                                         | 1.0           | 210                                          | -51° to +51°; 3°  | 0.6/1.0        | 83               | 69                 | 76                 | 0          | S333     |
| 326      | 0% load | <a href="#">46395</a> | Krios G2, K3, No      | 53Kx, 1.46 Å      | 6.0                                                         | 1.0           | 210                                          | -51° to +51°; 3°  | 0.6/1.0        | 95               | 30                 | 83                 | 0          | S334     |
| 327      | 0% load | <a href="#">46396</a> | Krios G2, K3, No      | 53Kx, 1.46 Å      | 6.0                                                         | 1.0           | 210                                          | -51° to +51°; 3°  | 0.6/1.0        | 70               | 28                 | 74                 | 0          | S335     |
| 328      | 0% load | <a href="#">46397</a> | Krios G2, K3, No      | 53Kx, 1.46 Å      | 6.0                                                         | 1.0           | 210                                          | -51° to +51°; 3°  | 0.6/1.0        | 76               | 27                 | 75                 | 0          | S336     |
| 329      | 0% load | <a href="#">46398</a> | Krios G2, K3, No      | 53Kx, 1.46 Å      | 6.0                                                         | 1.0           | 210                                          | -51° to +51°; 3°  | 0.6/1.0        | 78               | 27                 | 79                 | 0          | S337     |
| 330      | 0% load | <a href="#">46399</a> | Krios G2, K3, No      | 53Kx, 1.46 Å      | 6.0                                                         | 1.0           | 210                                          | -51° to +51°; 3°  | 0.6/1.0        | 73               | 27                 | 76                 | 0          | S338     |
| 331      | 0% load | <a href="#">46400</a> | Krios G2, K3, No      | 53Kx, 1.46 Å      | 6.0                                                         | 1.0           | 210                                          | -51° to +51°; 3°  | 0.6/1.0        | 77               | 27                 | 74                 | 0          | S339     |
| 332      | 0% load | <a href="#">46401</a> | Krios G2, K3, No      | 53Kx, 1.46 Å      | 6.0                                                         | 1.0           | 210                                          | -51° to +51°; 3°  | 0.6/1.0        | 77               | 29                 | 75                 | 0          | S340     |
| 333      | 0% load | <a href="#">46402</a> | Krios G2, K3, No      | 53Kx, 1.46 Å      | 6.0                                                         | 1.0           | 210                                          | -51° to +51°; 3°  | 0.6/1.0        | 72               | 27                 | 79                 | 0          | S341     |
| 334      | 0% load | <a href="#">46403</a> | Krios G2, K3, No      | 53Kx, 1.46 Å      | 6.0                                                         | 1.0           | 210                                          | -51° to +51°; 3°  | 0.6/1.0        | 73               | 28                 | 74                 | 0          | S342     |
| 335      | 0% load | <a href="#">46404</a> | Krios G2, K3, No      | 53Kx, 1.46 Å      | 6.0                                                         | 1.0           | 210                                          | -51° to +51°; 3°  | 0.6/1.0        | 72               | 27                 | 71                 | 0          | S343     |
| 336      | 0% load | <a href="#">46405</a> | Krios G2, K3, No      | 53Kx, 1.46 Å      | 6.0                                                         | 1.0           | 210                                          | -51° to +51°; 3°  | 0.6/1.0        | 98               | 28                 | 73                 | 0          | S344     |
| 337      | 0% load | <a href="#">46406</a> | Krios G2, K3, No      | 53Kx, 1.46 Å      | 6.0                                                         | 1.0           | 210                                          | -51° to +51°; 3°  | 0.6/1.0        | 68               | 26                 | 77                 | 0          | S345     |
| Part. ID | Sample  | EMDB ID               | TEM, camera, CDS mode | Mag. and Apix (Å) | Dose rate (e <sup>-</sup> Å <sup>-2</sup> s <sup>-1</sup> ) | Exp. time (s) | Total dose (e <sup>-</sup> Å <sup>-2</sup> ) | Angle range; step | Contour levels | Map-map FSC @0.5 | Map-map FSC @0.143 | Map-model FSC @0.5 | Ferritin # | Figure # |

EMDB stands for Electron Microscopy Data Bank, <https://www.ebi.ac.uk/pdbe/emdb/>. Krios G2 refers to the FEI Titan Krios TEM. Zeiss 120 refers to the Zeiss Libra 120 Plus TEM. K3 refers to the Gatan K3 Direct Detector. CCD refers to the Gatan UltraScan 4000 4Kx4K charged-coupled device. CDS stands for correlated-double sampling mode.

## Supplementary Figures:

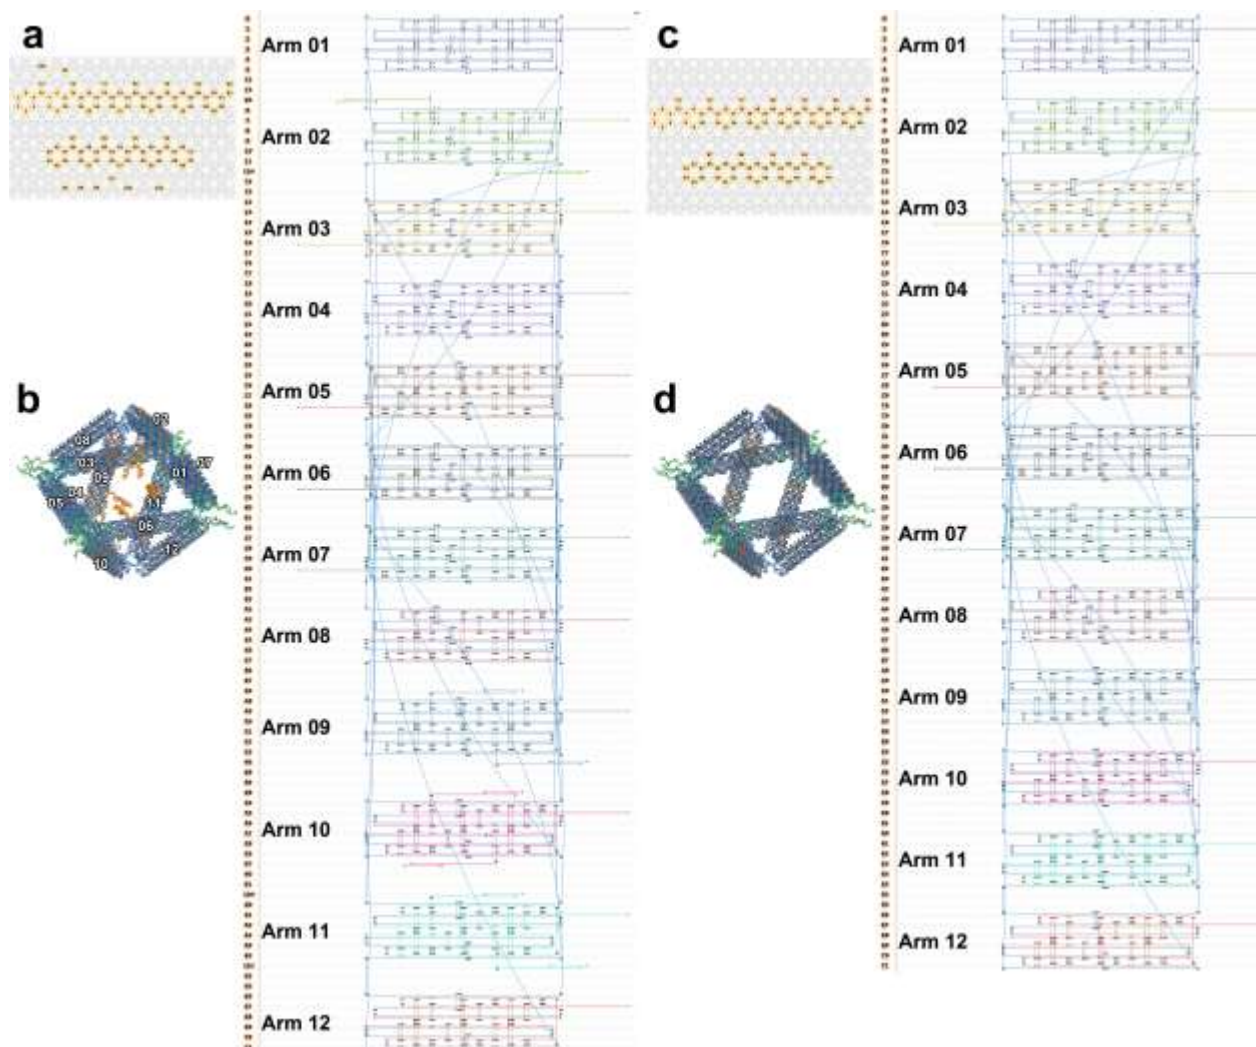

**Supplementary Fig. 1: Secondary structure of DNA origami octahedral cage with and without a linker for ferritin. a,** Secondary structure of the DNA origami octahedral cage with ferritin linkers. **b,** Secondary structure of the DNA origami octahedral cage without ferritin linkers.

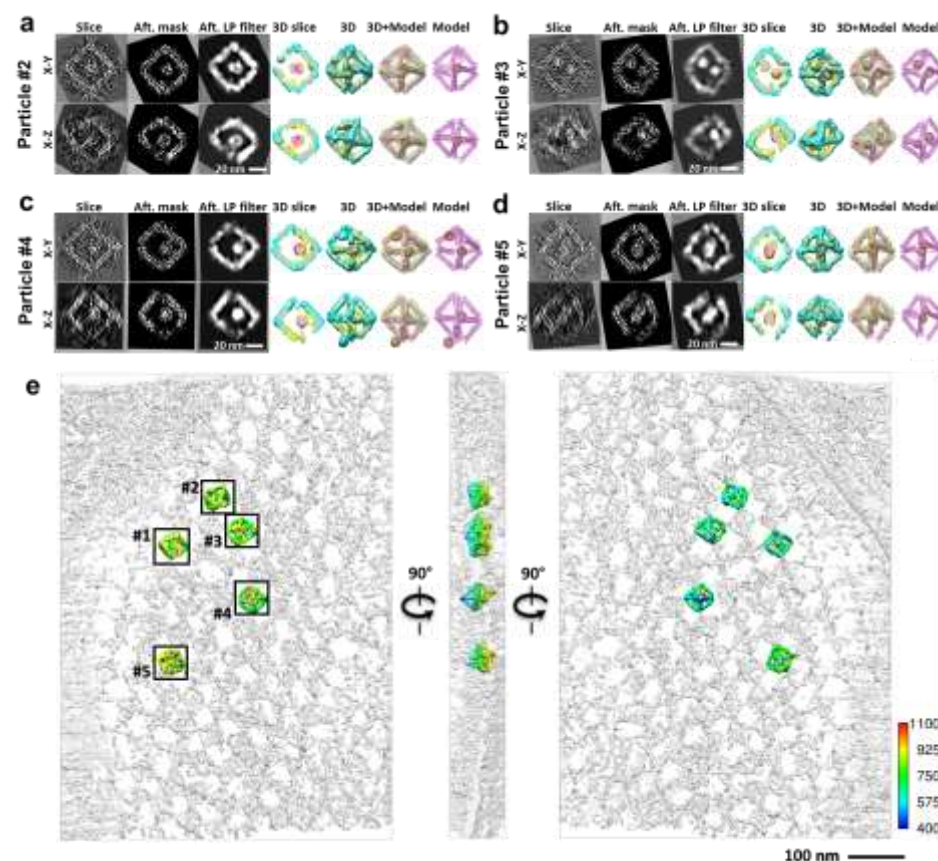

**Supplementary Fig. 2: Examples of IPET 3D reconstruction intermediate for four representative unit-cell particle in a 2D lattice with 100% ferritin loading.** **a**, Perpendicular cross-sections of an IPET 3D reconstruction for the unit-cell particle #38. The first four images (left) show the reconstruction stages: before and after applying a soft-boundary mask, following low-pass filtering, and the 3D view of the cross-section in the final reconstruction. These are compared with the next three columns (right), which display the 3D map, the superimposed fitting model, and the final fitted model. **b-d**, Examples of IPET 3D reconstructions for three additional particles (#46, #65, and #101), analyzed using the same methodology as in **a**. **e**, Three views of the low-resolution 3D map of the entire 2D lattice reconstructed by IMOD, with five IPET 3D density maps from five individual unit-cell particles superimposed. The color scheme represents depth, enhancing visualization of structural features.



### Lattice dynamics (100% load)

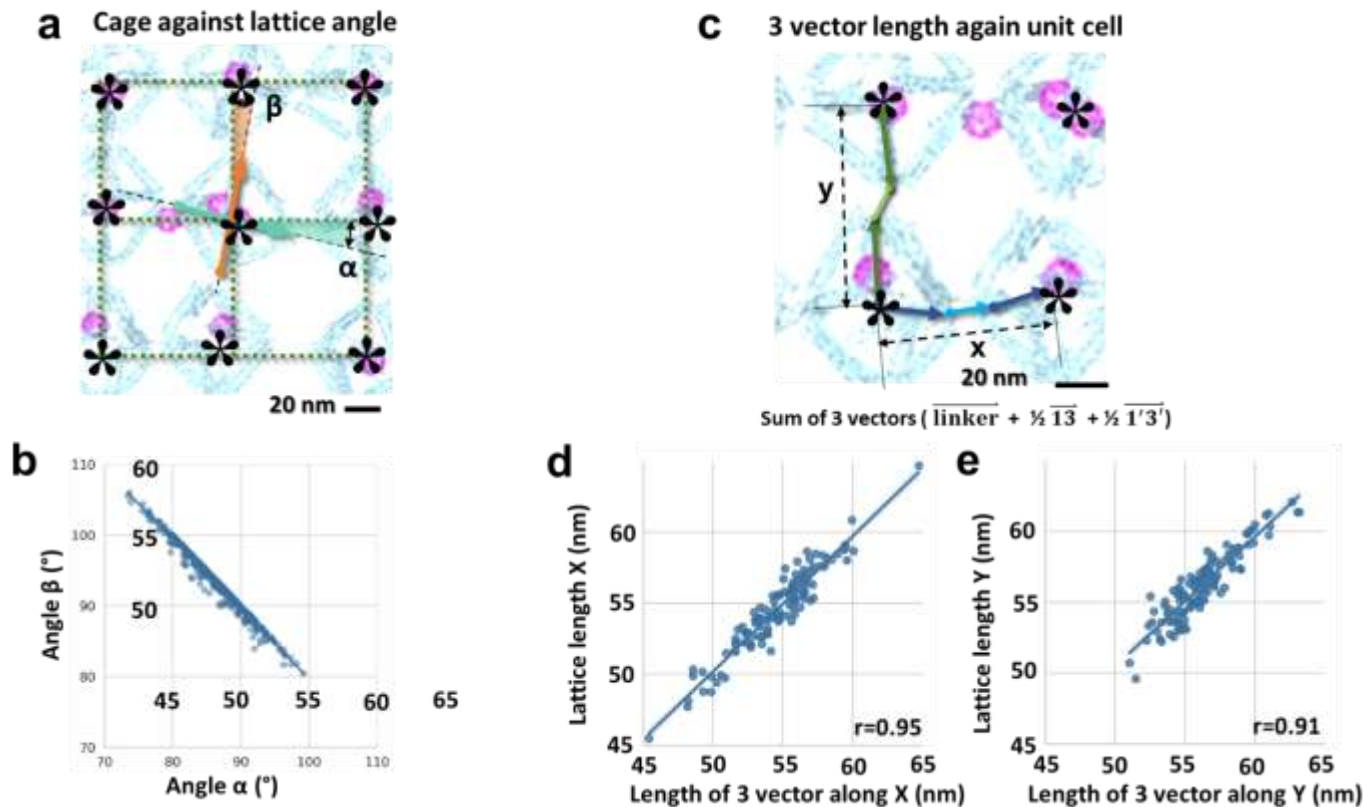

**Supplementary Fig. 3: Statistical analysis of structural variability in unit-cell particles relative to their formed lattice (100% ferritin loading).** **a**, Schematic representation of the measurement of the unit-cell angle relative to the lattice. This angle is defined as the direction from vertex to vertex along the diagonal within the unit-cell in-plane quadrilateral formed by the 4 HBs, compared to the lattice-averaged direction along the X and Y axes, respectively. **b**, Correlation analysis the angles along X-axis versus the Y-axis. **c**, Schematic illustration of the measurement of the center-to-center distances between two adjunct unit-cell particles, as well as the combined distances of the vectors. These vectors are composed of two halves of the adjacent unit-cell particle sizes plus their linker, measured along the X and Y axes, respectively. **d,e**, Correlation analyses of the center-to-center distances and the combined distances of the three vectors along the X-axis and Y-axis, respectively.

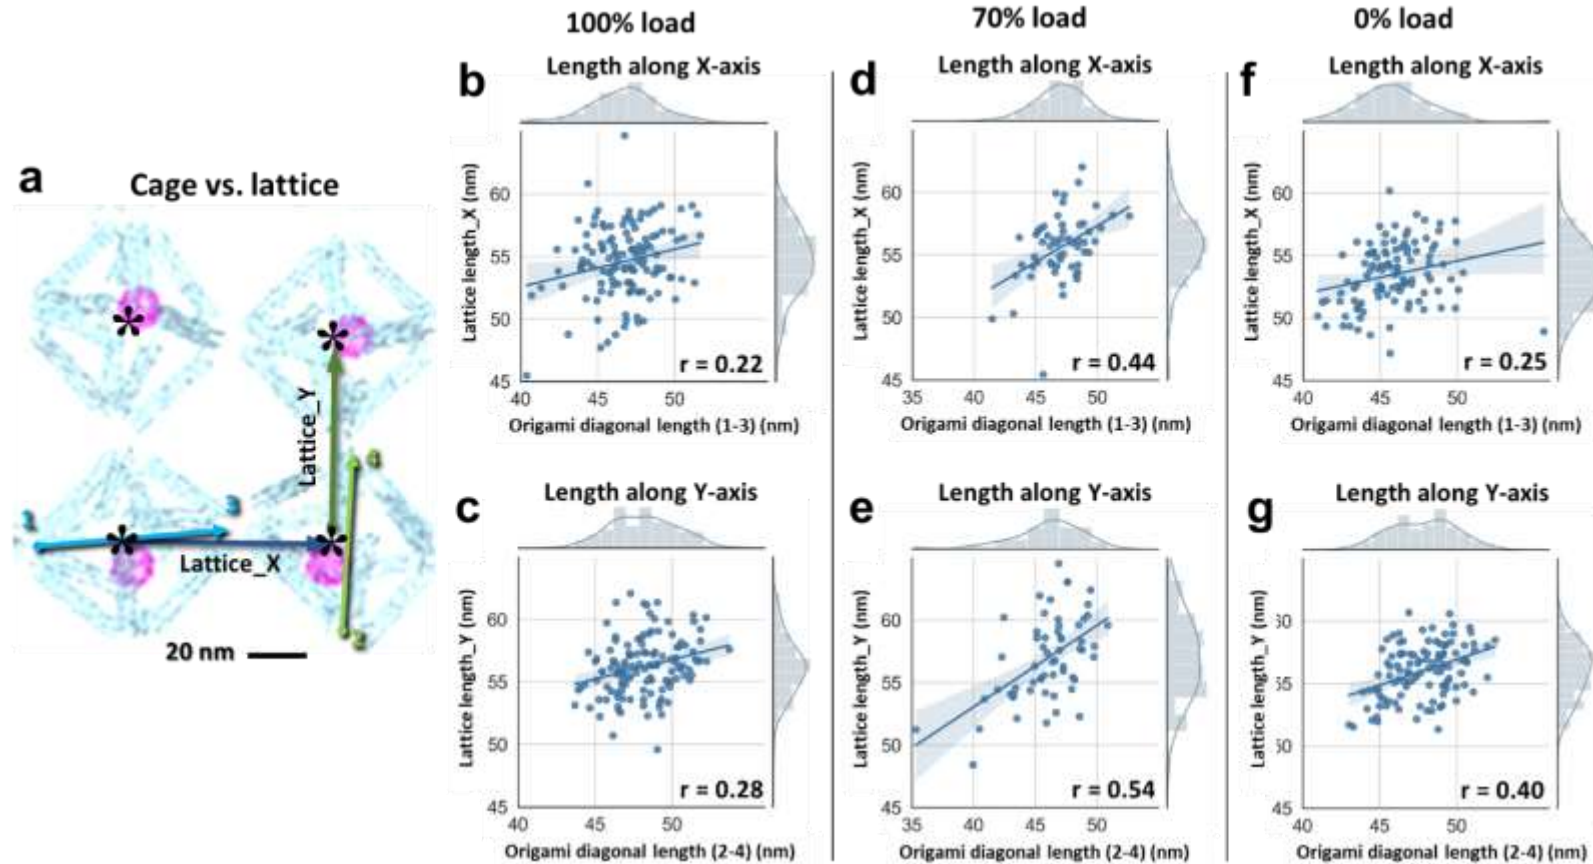

**Supplementary Fig. 4: Correlation analysis between unit-cell particle size and lattice lengths.** **a**, Schematic illustration of unit-cell particle size and lattice length measurements. The particle size is determined by the vertex-to-vertex distances along two diagonal directions within the in-plane quadrilateral formed by the 4 HBs of a unit-cell particle. The lattice length is measured as the distance between the centers of two adjacent unit-cell particles. **b,c**, Histograms of particle sizes and lattice lengths within a lattice with 100% ferritin loading, along with correlation analyses between particle sizes and lattice lengths along the X- and Y-axes, respectively. **d, e**, Equivalent analyses performed on a lattice with 70% ferritin loading. **f, g**, Equivalent analyses performed on a lattice with 0% ferritin loading.



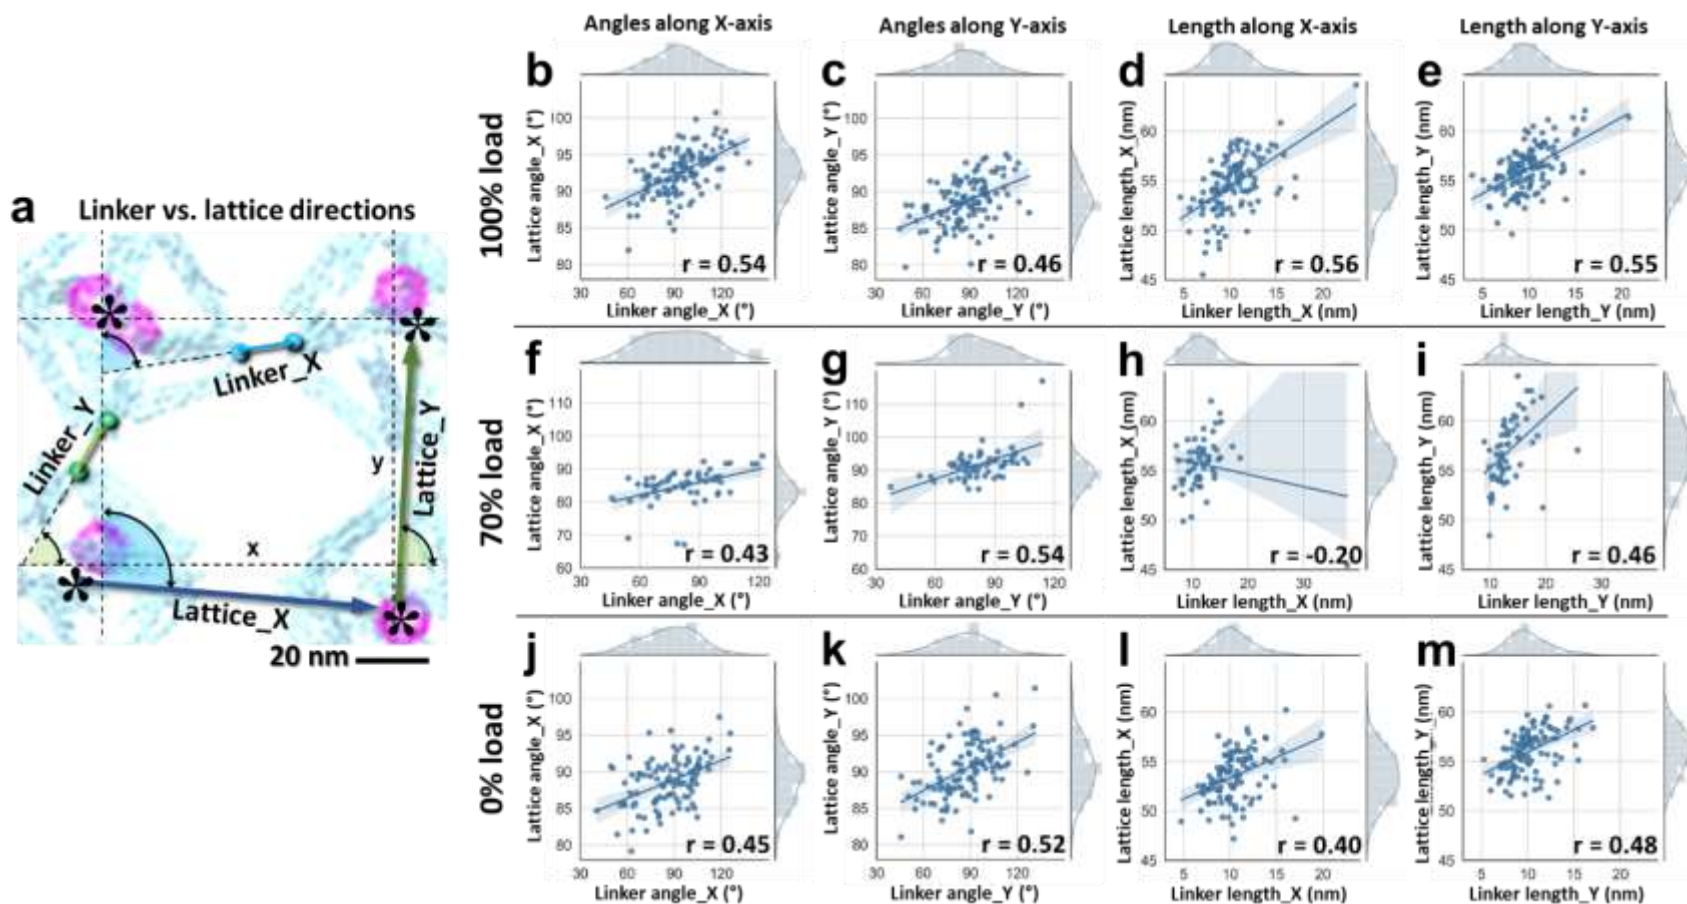

**Supplementary Fig. 5: Correlation analysis between linker angle and length versus lattice angles and lengths.** **a**, Schematic illustration of the measurements. The linker angle and length are determined between the closest vertices of two adjacent unit-cell particles relative to the averaged lattice direction. The lattice angle and length are measured between the centers of two adjacent unit-cell particles. **b,c**, Histograms of linker angles and lattice angles along the X- and Y-axes within the 100% ferritin-loaded 2D lattice, along with correlation analyses between these angles along the X- and Y-axes, respectively. **d,e**, Histograms of linker lengths and lattice lengths along the X- and Y-axes within the 100% ferritin-loaded 2D lattice, along with correlation analyses between these lengths along the X- and Y-axes, respectively. **f-i**, Equivalent analyses performed on a lattice with 70% ferritin loading. **j-m**, Equivalent analyses performed on a lattice with 0% ferritin loading.

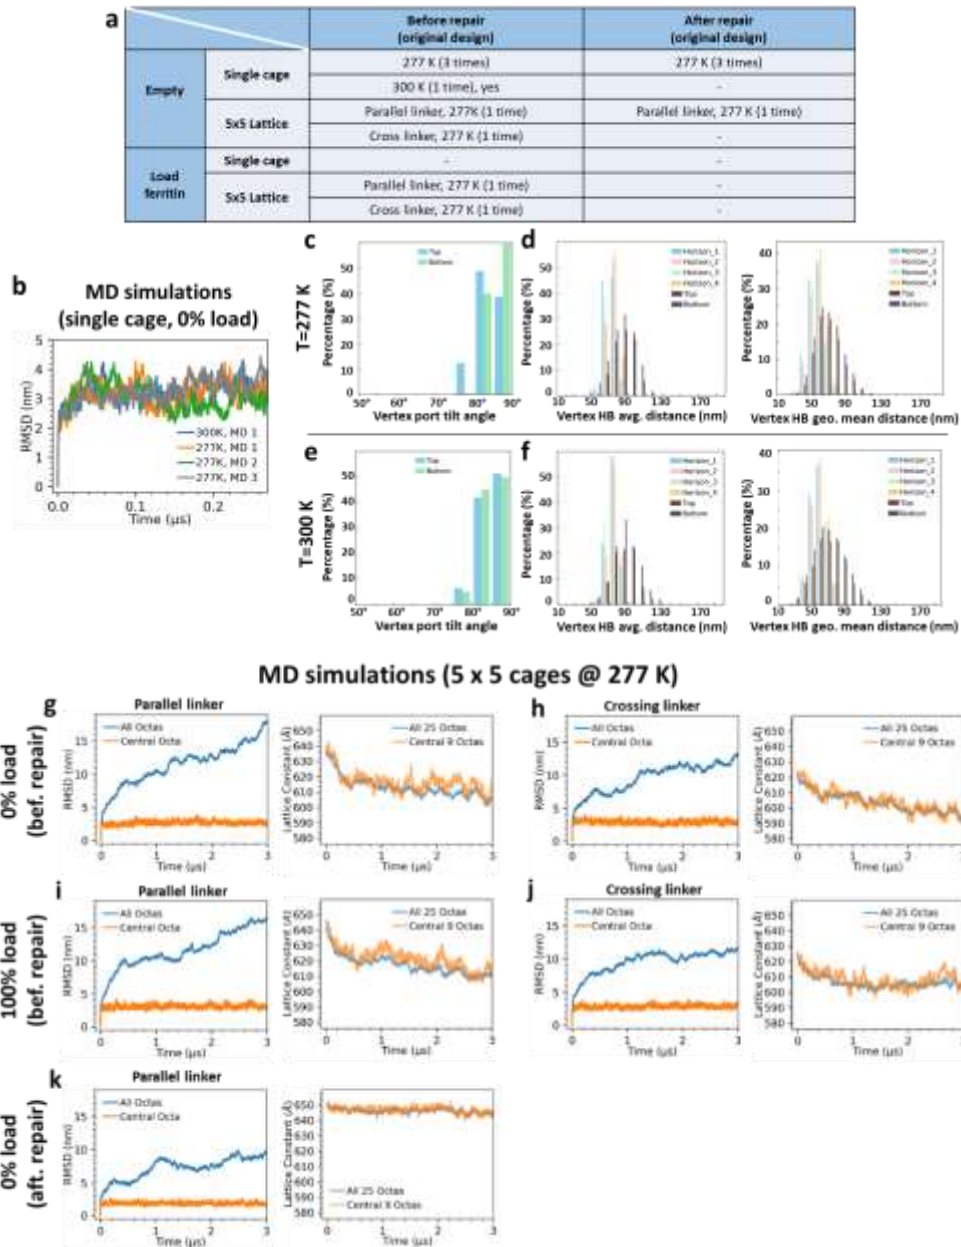

**Supplementary Fig. 6: MD simulation of DNA origami unit-cell particles and their 2D lattices.** **a**, Overview of MD simulation performance under various conditions. **b**, RMSD of a single unit-cell (a cage) over 0.25  $\mu$ s at different temperatures. **c**, Distribution of the top and bottom vertex angles relative to the lattice plane under a temperature of 277 K. **d**, Distribution of pore sizes analyzed using two averaging methods. **e,f**, A similar MD simulation under a temperature of 300 K. **g**, MD simulation of a 5x5 2D lattice of unit-cell particles without repair or ferritin loading, using parallel linkers for a 3  $\mu$ s simulation. Both RMSD and lattice lengths are analyzed. **h**, MD simulation of the above 5x5 2D lattice under crossing linker conditions. **i,j**, MD simulations of the above 2D lattice with 100% ferritin loading. **k**, MD simulation of the repaired 2D lattice under the parallel linker condition.

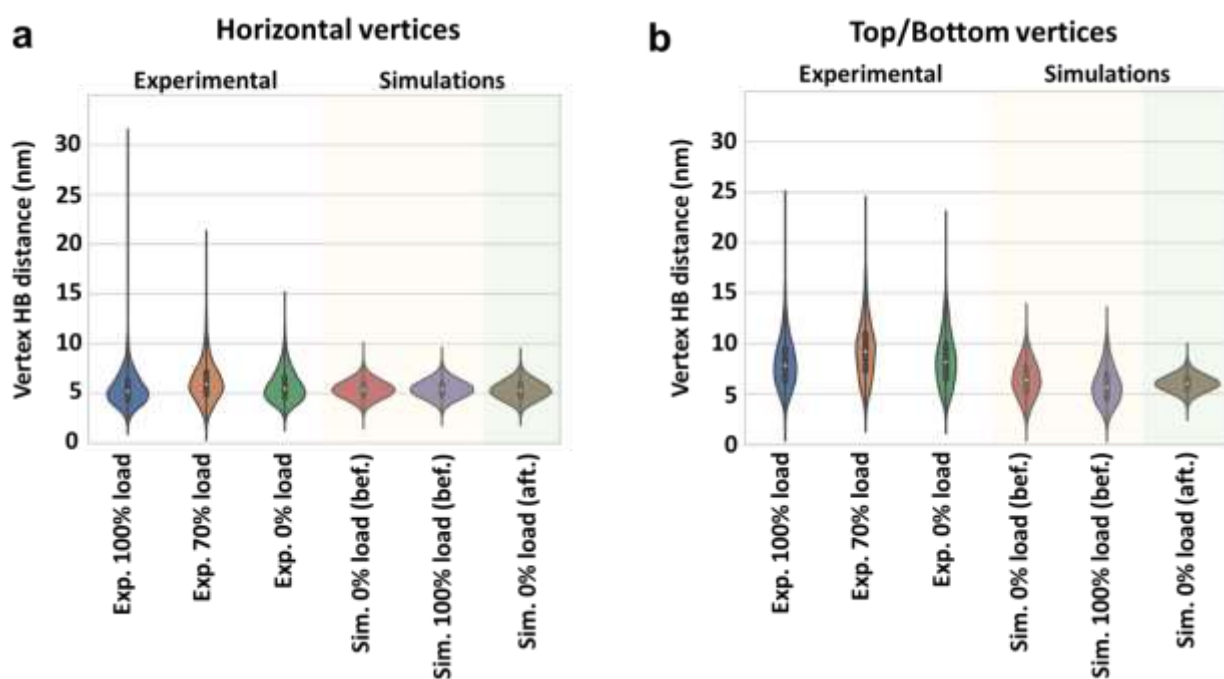

**Supplementary Fig. 7: Analysis of pore size variability under different experimental and MD simulations conditions.** **a**, Comparison of pore size distributions, measured as the average distances among the four distal ends of helical bundles at each vertex, along the lattice plane. **b**, Comparison of pore size distributions above and below the lattice plane.

## MD Simulations (after parallel repair, 0% load)

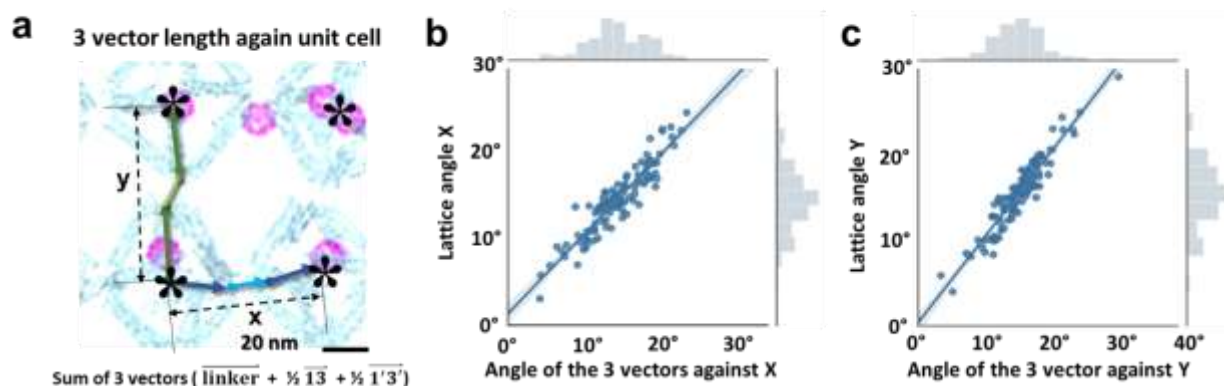

**Supplementary Fig. 8: Analysis of structural variability in repaired unit-cell particles relative to their simulated lattice formation.** **a**, A schematic representation of the measurement process for center-to-center distances between adjacent unit-cell particles, as well as the combined distances of their associated vectors. These vectors consist of the sum of two halves of the adjacent unit-cell particle sizes and their linker, measured along the X and Y axes, respectively. **b,c**, Correlation analyses of the center-to-center distances and combined vector distances along the X-axis and Y-axis, respectively.

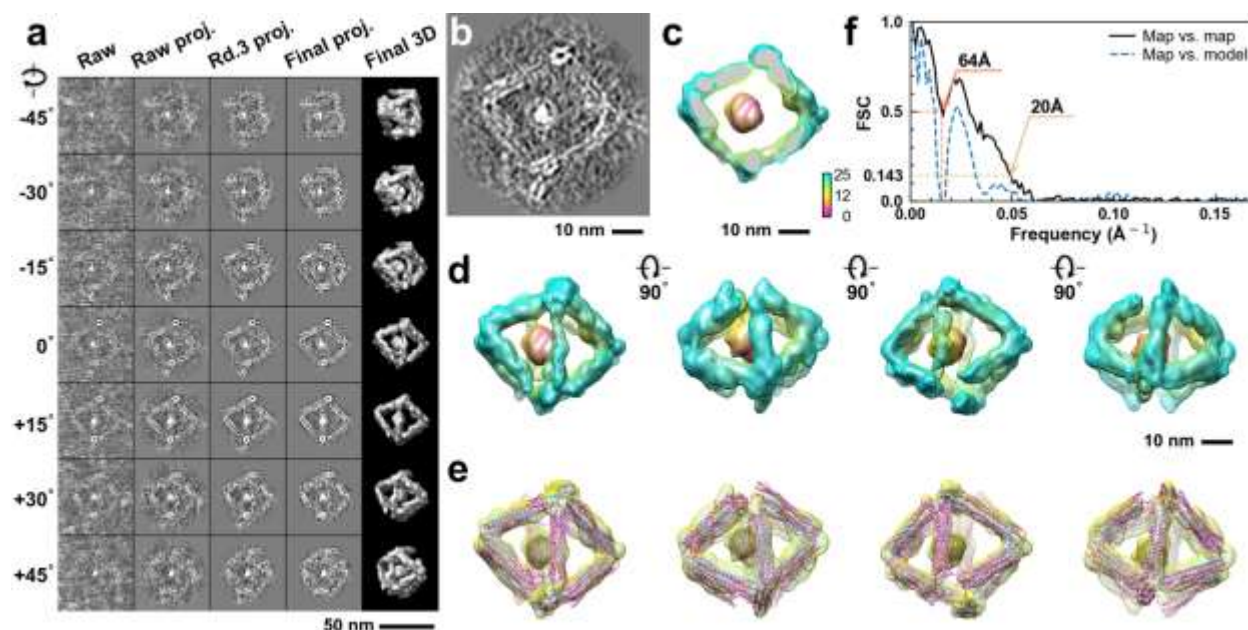

**Supplementary Fig. 9: IPET 3D reconstruction and model fitting of an individual unit-cell particle (Index: 001) within a 2D lattice with 100% ferritin loading.** **a**, Seven representative tilt images of a single unit-cell particle are shown in the first column (from left). The tilt images are aligned to a common center using IPET through iterative refinement. The projections of the raw, intermediate, and final 3D reconstruction at the corresponding angles are displayed in the subsequent four columns. **b**, A central cross-section (~23 nm thick) of the final reconstruction before masking is applied. **c**, 3D views of the central cross-section. **d**, Final 3D density map of this particle, viewed from four perpendicular directions. **e**, Final 3D reconstruction superimposed with the fitted model, viewed from four perpendicular directions. **f**, FSC analyses of the final map resolution using two methods: map-map FSC, where each map is reconstructed from one half of the images (even vs. odd tilt angle indices), and map-model FSC, where the model map is generated from the fitted model. Resolution assessments are provided based on tilt-based map-map and map-model FSC analyses at thresholds of FSC=0.5 and 0.143, respectively.



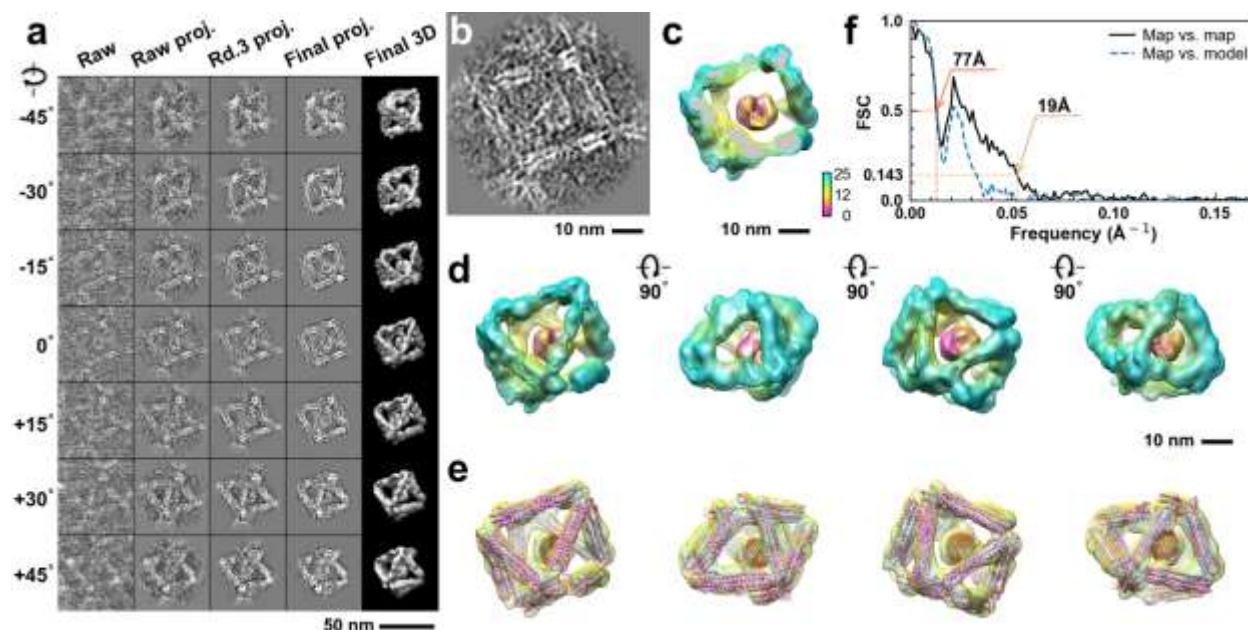

**Supplementary Fig. 10: IPET 3D reconstruction and model fitting of an individual unit-cell particle (Index: 002) within a 2D lattice with 100% ferritin loading.** **a**, Seven representative tilt images of a single unit-cell particle are shown in the first column (from left). The tilt images are aligned to a common center using IPET through iterative refinement. The projections of the raw, intermediate, and final 3D reconstruction at the corresponding angles are displayed in the subsequent four columns. **b**, A central cross-section (~23 nm thick) of the final reconstruction before masking is applied. **c**, 3D views of the central cross-section. **d**, Final 3D density map of this particle, viewed from four perpendicular directions. **e**, Final 3D reconstruction superimposed with the fitted model, viewed from four perpendicular directions. **f**, FSC analyses of the final map resolution using two methods: map-map FSC, where each map is reconstructed from one half of the images (even vs. odd tilt angle indices), and map-model FSC, where the model map is generated from the fitted model. Resolution assessments are provided based on tilt-based map-map and map-model FSC analyses at thresholds of FSC=0.5 and 0.143, respectively.



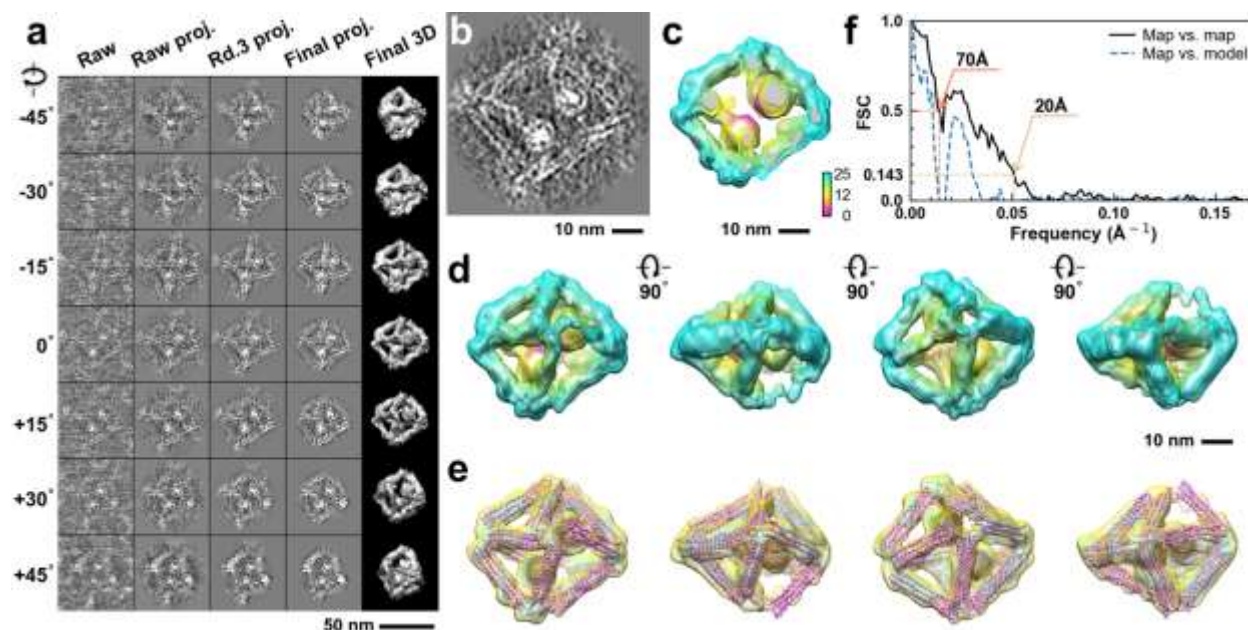

**Supplementary Fig. 11: IPET 3D reconstruction and model fitting of an individual unit-cell particle (Index: 003) within a 2D lattice with 100% ferritin loading.** **a**, Seven representative tilt images of a single unit-cell particle are shown in the first column (from left). The tilt images are aligned to a common center using IPET through iterative refinement. The projections of the raw, intermediate, and final 3D reconstruction at the corresponding angles are displayed in the subsequent four columns. **b**, A central cross-section (~23 nm thick) of the final reconstruction before masking is applied. **c**, 3D views of the central cross-section. **d**, Final 3D density map of this particle, viewed from four perpendicular directions. **e**, Final 3D reconstruction superimposed with the fitted model, viewed from four perpendicular directions. **f**, FSC analyses of the final map resolution using two methods: map-map FSC, where each map is reconstructed from one half of the images (even vs. odd tilt angle indices), and map-model FSC, where the model map is generated from the fitted model. Resolution assessments are provided based on tilt-based map-map and map-model FSC analyses at thresholds of FSC=0.5 and 0.143, respectively.

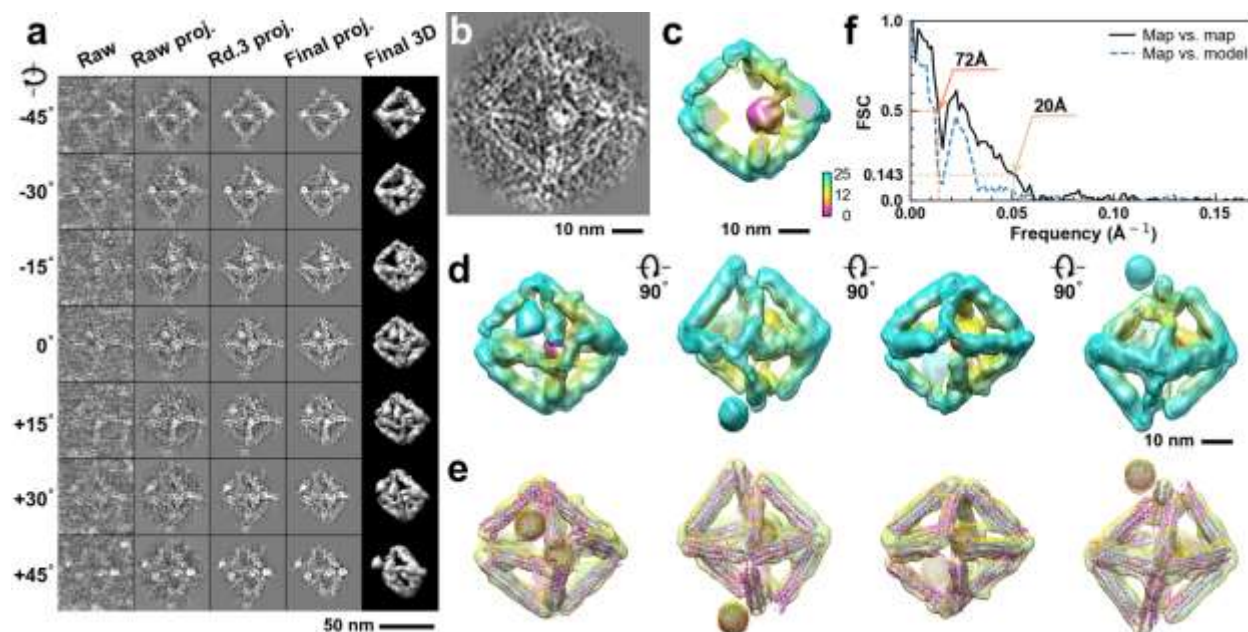

**Supplementary Fig. 12: IPET 3D reconstruction and model fitting of an individual unit-cell particle (Index: 004) within a 2D lattice with 100% ferritin loading.** **a**, Seven representative tilt images of a single unit-cell particle are shown in the first column (from left). The tilt images are aligned to a common center using IPET through iterative refinement. The projections of the raw, intermediate, and final 3D reconstruction at the corresponding angles are displayed in the subsequent four columns. **b**, A central cross-section (~23 nm thick) of the final reconstruction before masking is applied. **c**, 3D views of the central cross-section. **d**, Final 3D density map of this particle, viewed from four perpendicular directions. **e**, Final 3D reconstruction superimposed with the fitted model, viewed from four perpendicular directions. **f**, FSC analyses of the final map resolution using two methods: map-map FSC, where each map is reconstructed from one half of the images (even vs. odd tilt angle indices), and map-model FSC, where the model map is generated from the fitted model. Resolution assessments are provided based on tilt-based map-map and map-model FSC analyses at thresholds of FSC=0.5 and 0.143, respectively.

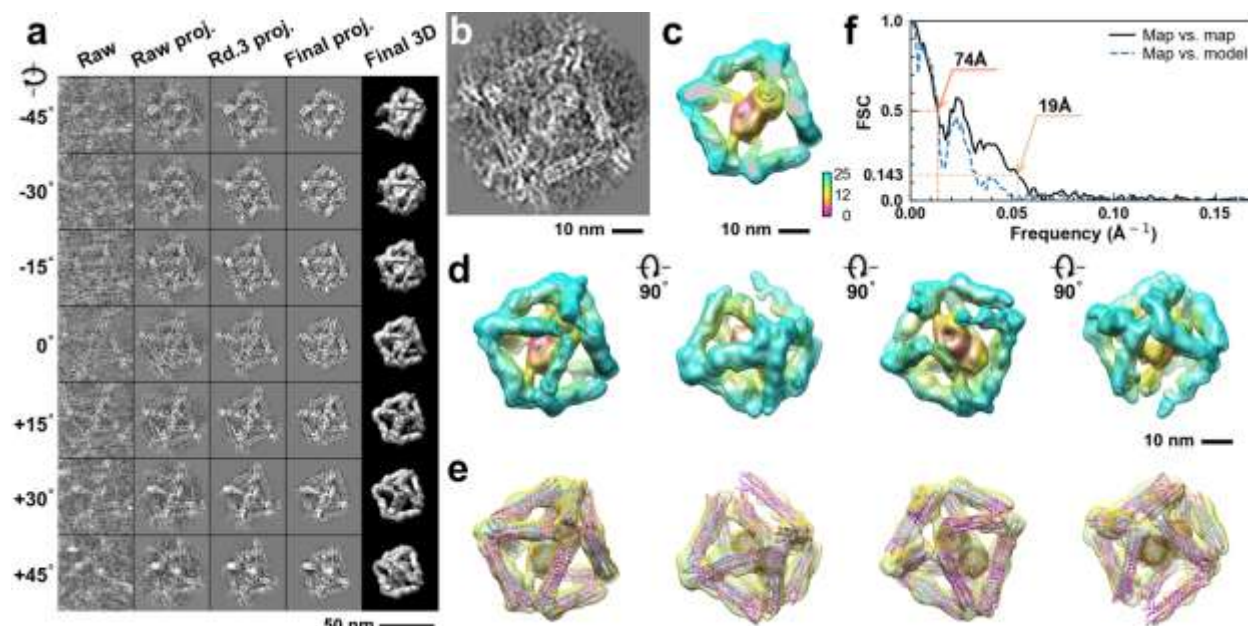

**Supplementary Fig. 13: IPET 3D reconstruction and model fitting of an individual unit-cell particle (Index: 005) within a 2D lattice with 100% ferritin loading.** **a**, Seven representative tilt images of a single unit-cell particle are shown in the first column (from left). The tilt images are aligned to a common center using IPET through iterative refinement. The projections of the raw, intermediate, and final 3D reconstruction at the corresponding angles are displayed in the subsequent four columns. **b**, A central cross-section (~23 nm thick) of the final reconstruction before masking is applied. **c**, 3D views of the central cross-section. **d**, Final 3D density map of this particle, viewed from four perpendicular directions. **e**, Final 3D reconstruction superimposed with the fitted model, viewed from four perpendicular directions. **f**, FSC analyses of the final map resolution using two methods: map-map FSC, where each map is reconstructed from one half of the images (even vs. odd tilt angle indices), and map-model FSC, where the model map is generated from the fitted model. Resolution assessments are provided based on tilt-based map-map and map-model FSC analyses at thresholds of FSC=0.5 and 0.143, respectively.

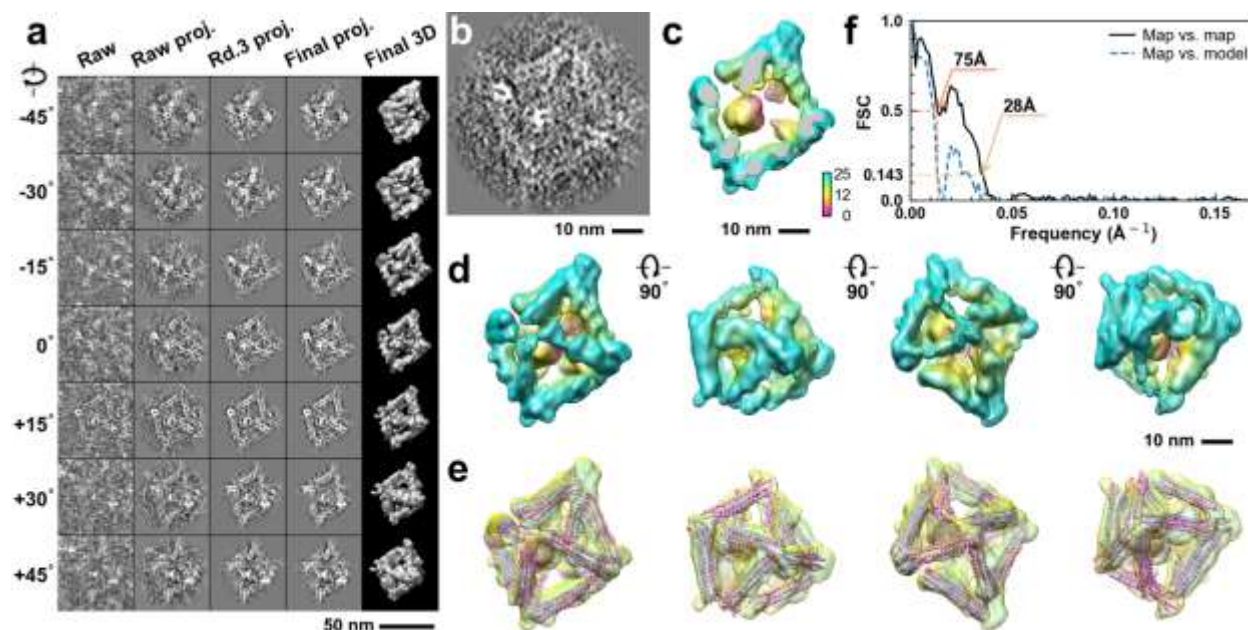

**Supplementary Fig. 14: IPET 3D reconstruction and model fitting of an individual unit-cell particle (Index: 006) within a 2D lattice with 100% ferritin loading.** **a**, Seven representative tilt images of a single unit-cell particle are shown in the first column (from left). The tilt images are aligned to a common center using IPET through iterative refinement. The projections of the raw, intermediate, and final 3D reconstruction at the corresponding angles are displayed in the subsequent four columns. **b**, A central cross-section (~23 nm thick) of the final reconstruction before masking is applied. **c**, 3D views of the central cross-section. **d**, Final 3D density map of this particle, viewed from four perpendicular directions. **e**, Final 3D reconstruction superimposed with the fitted model, viewed from four perpendicular directions. **f**, FSC analyses of the final map resolution using two methods: map-map FSC, where each map is reconstructed from one half of the images (even vs. odd tilt angle indices), and map-model FSC, where the model map is generated from the fitted model. Resolution assessments are provided based on tilt-based map-map and map-model FSC analyses at thresholds of FSC=0.5 and 0.143, respectively.



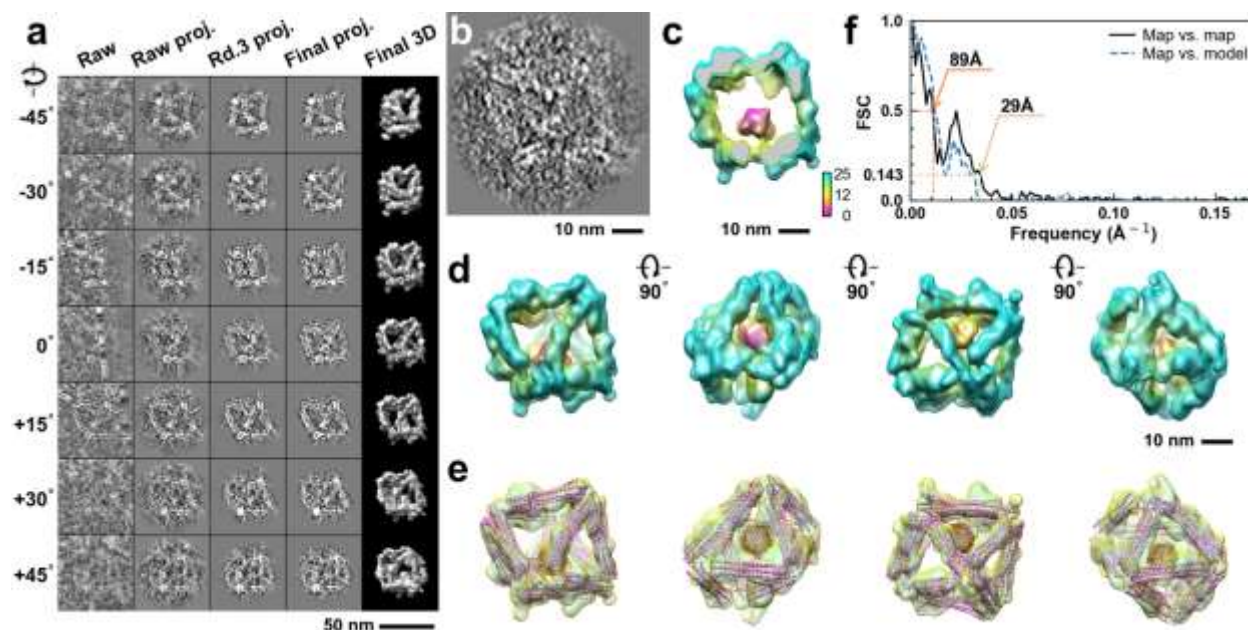

**Supplementary Fig. 15: IPET 3D reconstruction and model fitting of an individual unit-cell particle (Index: 007) within a 2D lattice with 100% ferritin loading.** **a**, Seven representative tilt images of a single unit-cell particle are shown in the first column (from left). The tilt images are aligned to a common center using IPET through iterative refinement. The projections of the raw, intermediate, and final 3D reconstruction at the corresponding angles are displayed in the subsequent four columns. **b**, A central cross-section (~23 nm thick) of the final reconstruction before masking is applied. **c**, 3D views of the central cross-section. **d**, Final 3D density map of this particle, viewed from four perpendicular directions. **e**, Final 3D reconstruction superimposed with the fitted model, viewed from four perpendicular directions. **f**, FSC analyses of the final map resolution using two methods: map-map FSC, where each map is reconstructed from one half of the images (even vs. odd tilt angle indices), and map-model FSC, where the model map is generated from the fitted model. Resolution assessments are provided based on tilt-based map-map and map-model FSC analyses at thresholds of FSC=0.5 and 0.143, respectively.

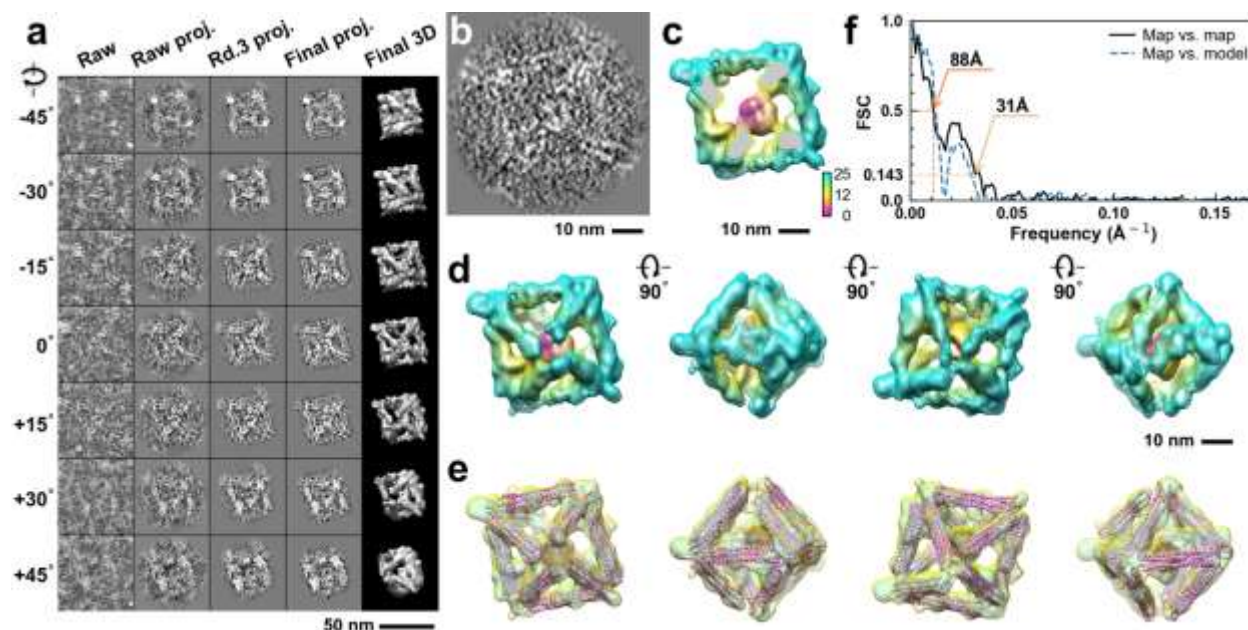

**Supplementary Fig. 16: IPET 3D reconstruction and model fitting of an individual unit-cell particle (Index: 008) within a 2D lattice with 100% ferritin loading.** **a**, Seven representative tilt images of a single unit-cell particle are shown in the first column (from left). The tilt images are aligned to a common center using IPET through iterative refinement. The projections of the raw, intermediate, and final 3D reconstruction at the corresponding angles are displayed in the subsequent four columns. **b**, A central cross-section (~23 nm thick) of the final reconstruction before masking is applied. **c**, 3D views of the central cross-section. **d**, Final 3D density map of this particle, viewed from four perpendicular directions. **e**, Final 3D reconstruction superimposed with the fitted model, viewed from four perpendicular directions. **f**, FSC analyses of the final map resolution using two methods: map-map FSC, where each map is reconstructed from one half of the images (even vs. odd tilt angle indices), and map-model FSC, where the model map is generated from the fitted model. Resolution assessments are provided based on tilt-based map-map and map-model FSC analyses at thresholds of FSC=0.5 and 0.143, respectively.



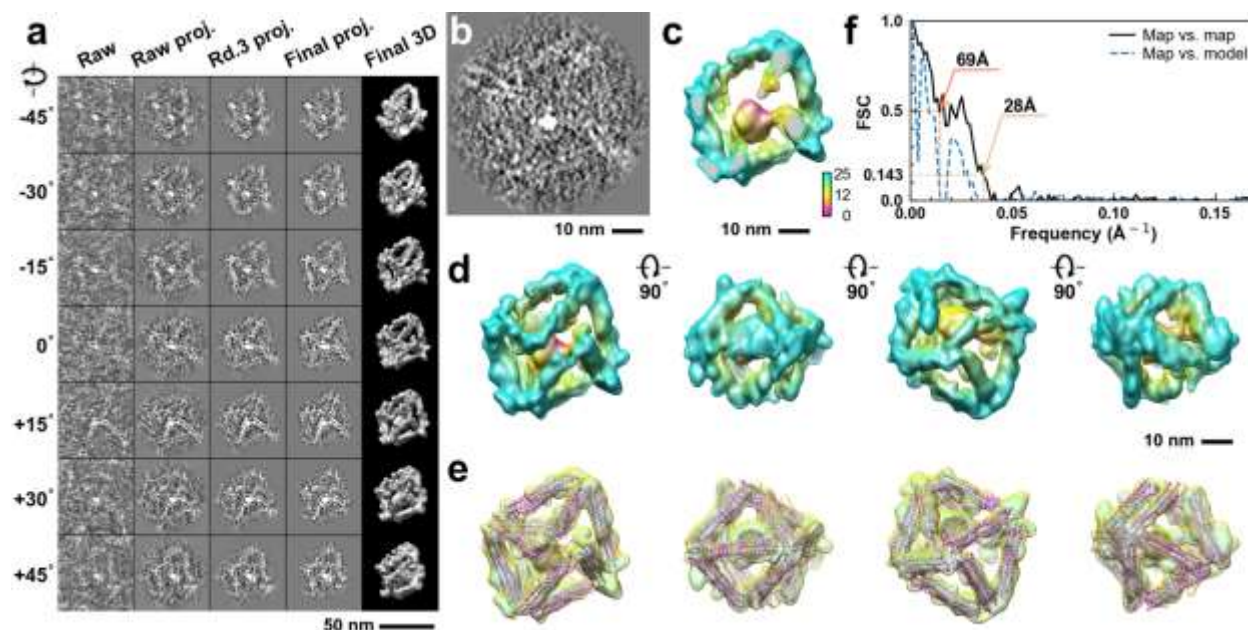

**Supplementary Fig. 17: IPET 3D reconstruction and model fitting of an individual unit-cell particle (Index: 009) within a 2D lattice with 100% ferritin loading.** **a**, Seven representative tilt images of a single unit-cell particle are shown in the first column (from left). The tilt images are aligned to a common center using IPET through iterative refinement. The projections of the raw, intermediate, and final 3D reconstruction at the corresponding angles are displayed in the subsequent four columns. **b**, A central cross-section (~23 nm thick) of the final reconstruction before masking is applied. **c**, 3D views of the central cross-section. **d**, Final 3D density map of this particle, viewed from four perpendicular directions. **e**, Final 3D reconstruction superimposed with the fitted model, viewed from four perpendicular directions. **f**, FSC analyses of the final map resolution using two methods: map-map FSC, where each map is reconstructed from one half of the images (even vs. odd tilt angle indices), and map-model FSC, where the model map is generated from the fitted model. Resolution assessments are provided based on tilt-based map-map and map-model FSC analyses at thresholds of FSC=0.5 and 0.143, respectively.

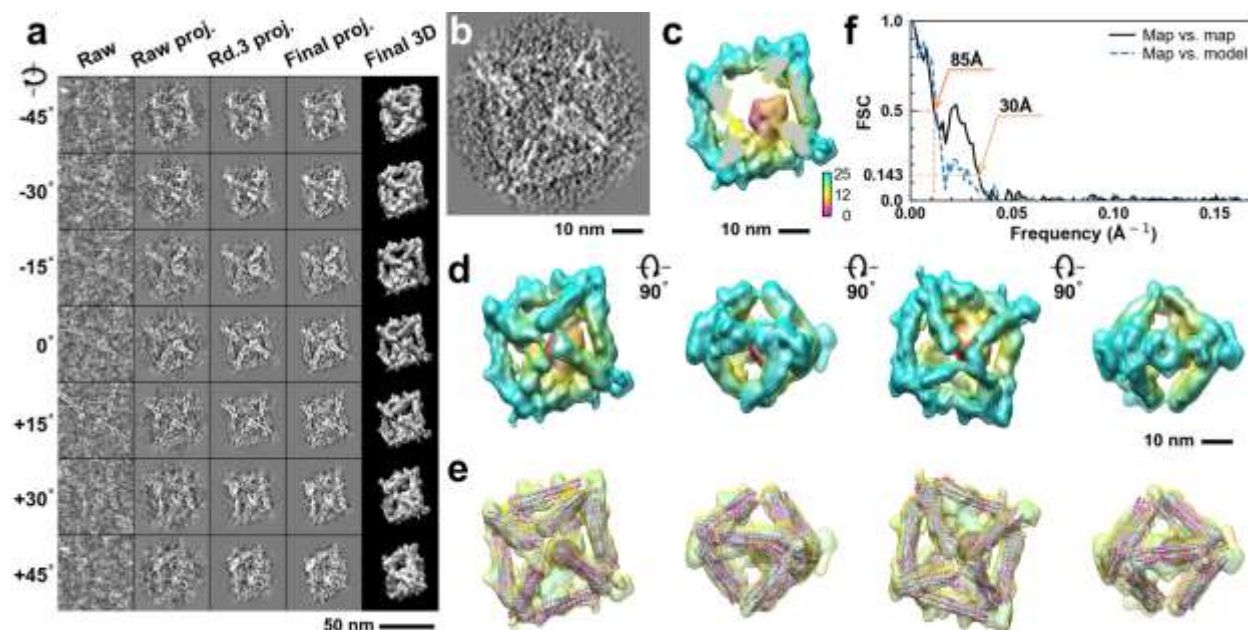

**Supplementary Fig. 18: IPET 3D reconstruction and model fitting of an individual unit-cell particle (Index: 010) within a 2D lattice with 100% ferritin loading.** **a**, Seven representative tilt images of a single unit-cell particle are shown in the first column (from left). The tilt images are aligned to a common center using IPET through iterative refinement. The projections of the raw, intermediate, and final 3D reconstruction at the corresponding angles are displayed in the subsequent four columns. **b**, A central cross-section (~23 nm thick) of the final reconstruction before masking is applied. **c**, 3D views of the central cross-section. **d**, Final 3D density map of this particle, viewed from four perpendicular directions. **e**, Final 3D reconstruction superimposed with the fitted model, viewed from four perpendicular directions. **f**, FSC analyses of the final map resolution using two methods: map-map FSC, where each map is reconstructed from one half of the images (even vs. odd tilt angle indices), and map-model FSC, where the model map is generated from the fitted model. Resolution assessments are provided based on tilt-based map-map and map-model FSC analyses at thresholds of FSC=0.5 and 0.143, respectively.

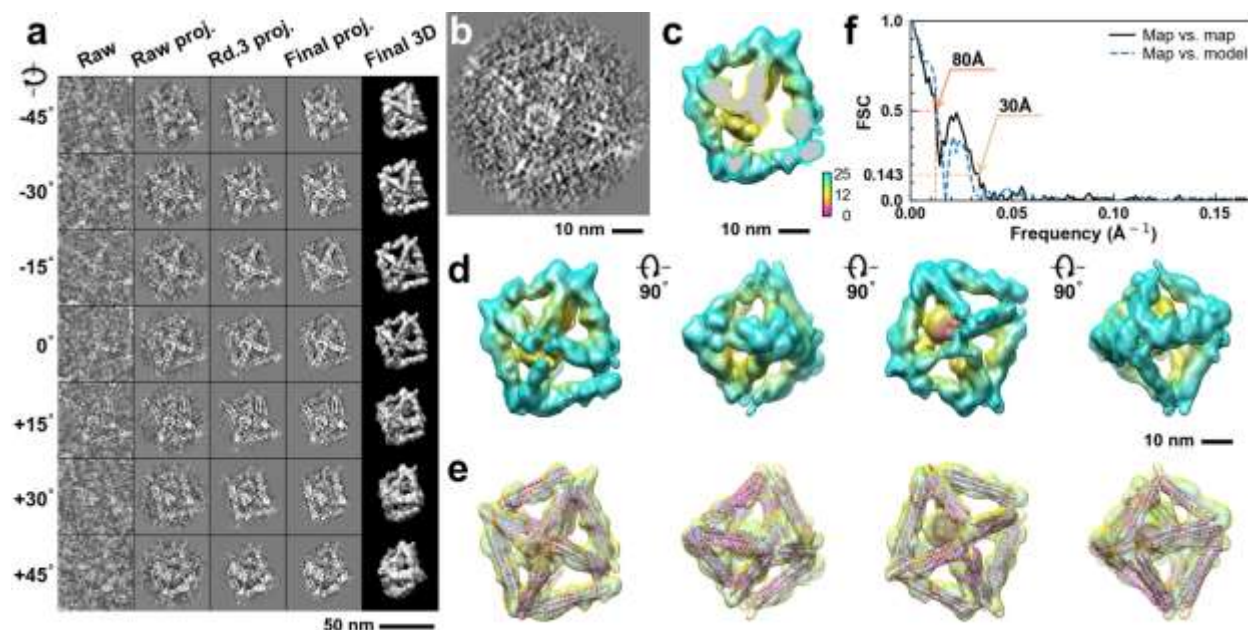

**Supplementary Fig. 19: IPET 3D reconstruction and model fitting of an individual unit-cell particle (Index: 011) within a 2D lattice with 100% ferritin loading.** **a**, Seven representative tilt images of a single unit-cell particle are shown in the first column (from left). The tilt images are aligned to a common center using IPET through iterative refinement. The projections of the raw, intermediate, and final 3D reconstruction at the corresponding angles are displayed in the subsequent four columns. **b**, A central cross-section (~23 nm thick) of the final reconstruction before masking is applied. **c**, 3D views of the central cross-section. **d**, Final 3D density map of this particle, viewed from four perpendicular directions. **e**, Final 3D reconstruction superimposed with the fitted model, viewed from four perpendicular directions. **f**, FSC analyses of the final map resolution using two methods: map-map FSC, where each map is reconstructed from one half of the images (even vs. odd tilt angle indices), and map-model FSC, where the model map is generated from the fitted model. Resolution assessments are provided based on tilt-based map-map and map-model FSC analyses at thresholds of FSC=0.5 and 0.143, respectively.

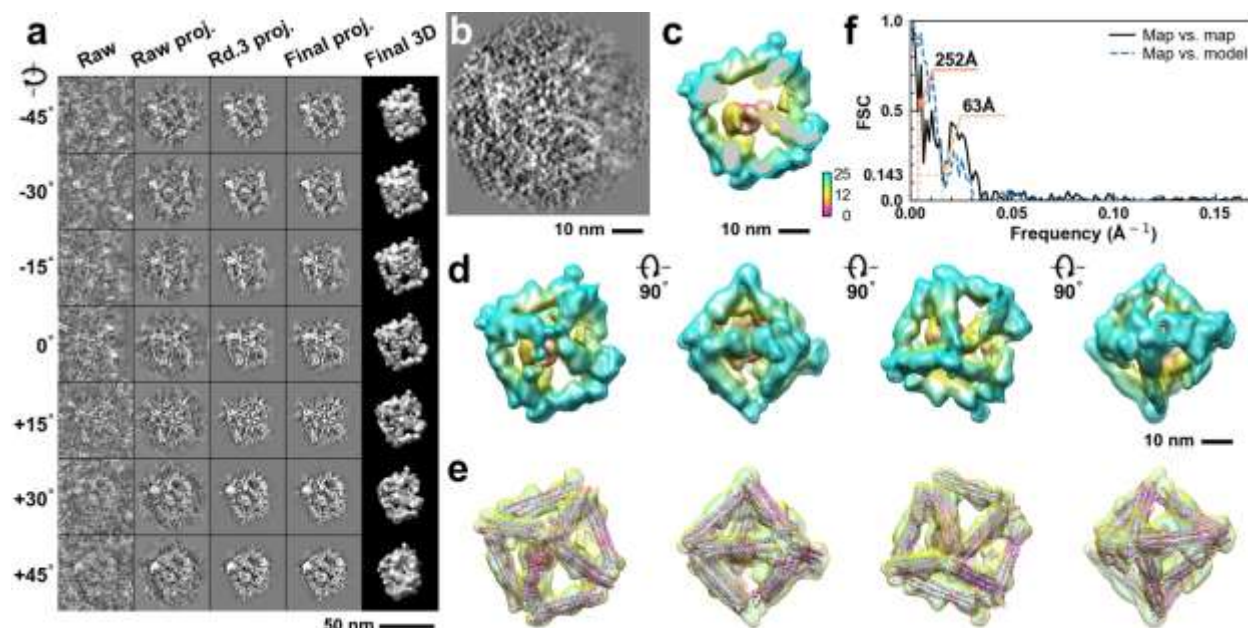

**Supplementary Fig. 20: IPET 3D reconstruction and model fitting of an individual unit-cell particle (Index: 012) within a 2D lattice with 100% ferritin loading.** **a**, Seven representative tilt images of a single unit-cell particle are shown in the first column (from left). The tilt images are aligned to a common center using IPET through iterative refinement. The projections of the raw, intermediate, and final 3D reconstruction at the corresponding angles are displayed in the subsequent four columns. **b**, A central cross-section (~23 nm thick) of the final reconstruction before masking is applied. **c**, 3D views of the central cross-section. **d**, Final 3D density map of this particle, viewed from four perpendicular directions. **e**, Final 3D reconstruction superimposed with the fitted model, viewed from four perpendicular directions. **f**, FSC analyses of the final map resolution using two methods: map-map FSC, where each map is reconstructed from one half of the images (even vs. odd tilt angle indices), and map-model FSC, where the model map is generated from the fitted model. Resolution assessments are provided based on tilt-based map-map and map-model FSC analyses at thresholds of FSC=0.5 and 0.143, respectively.



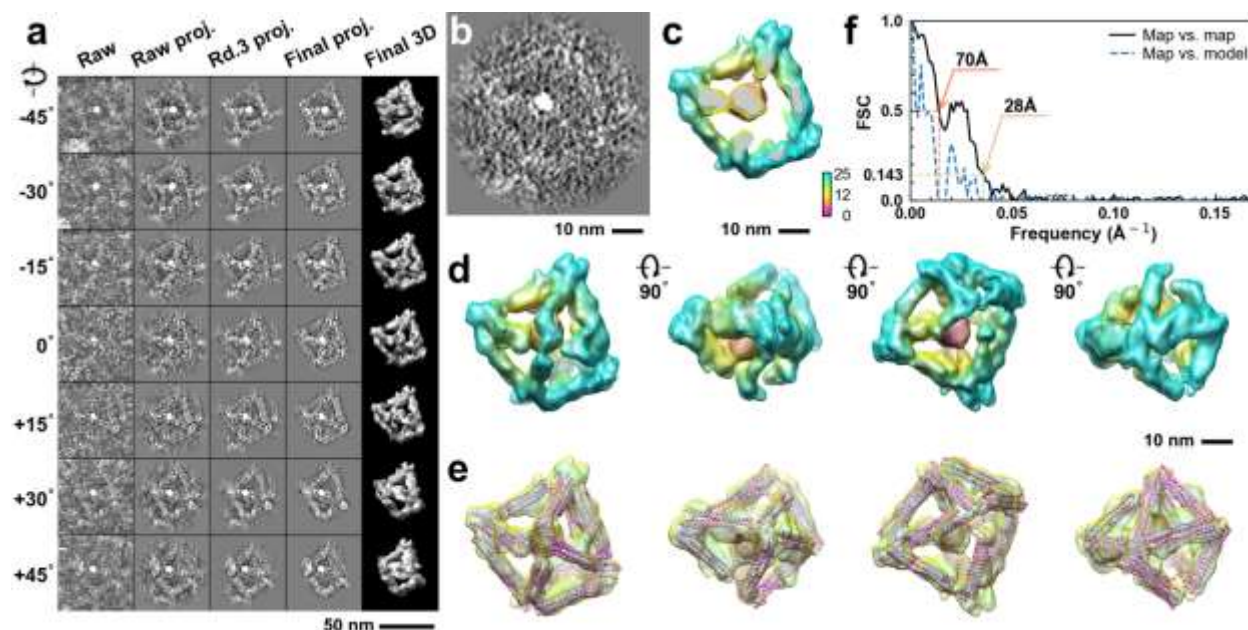

**Supplementary Fig. 21: IPET 3D reconstruction and model fitting of an individual unit-cell particle (Index: 013) within a 2D lattice with 100% ferritin loading.** **a**, Seven representative tilt images of a single unit-cell particle are shown in the first column (from left). The tilt images are aligned to a common center using IPET through iterative refinement. The projections of the raw, intermediate, and final 3D reconstruction at the corresponding angles are displayed in the subsequent four columns. **b**, A central cross-section (~23 nm thick) of the final reconstruction before masking is applied. **c**, 3D views of the central cross-section. **d**, Final 3D density map of this particle, viewed from four perpendicular directions. **e**, Final 3D reconstruction superimposed with the fitted model, viewed from four perpendicular directions. **f**, FSC analyses of the final map resolution using two methods: map-map FSC, where each map is reconstructed from one half of the images (even vs. odd tilt angle indices), and map-model FSC, where the model map is generated from the fitted model. Resolution assessments are provided based on tilt-based map-map and map-model FSC analyses at thresholds of FSC=0.5 and 0.143, respectively.



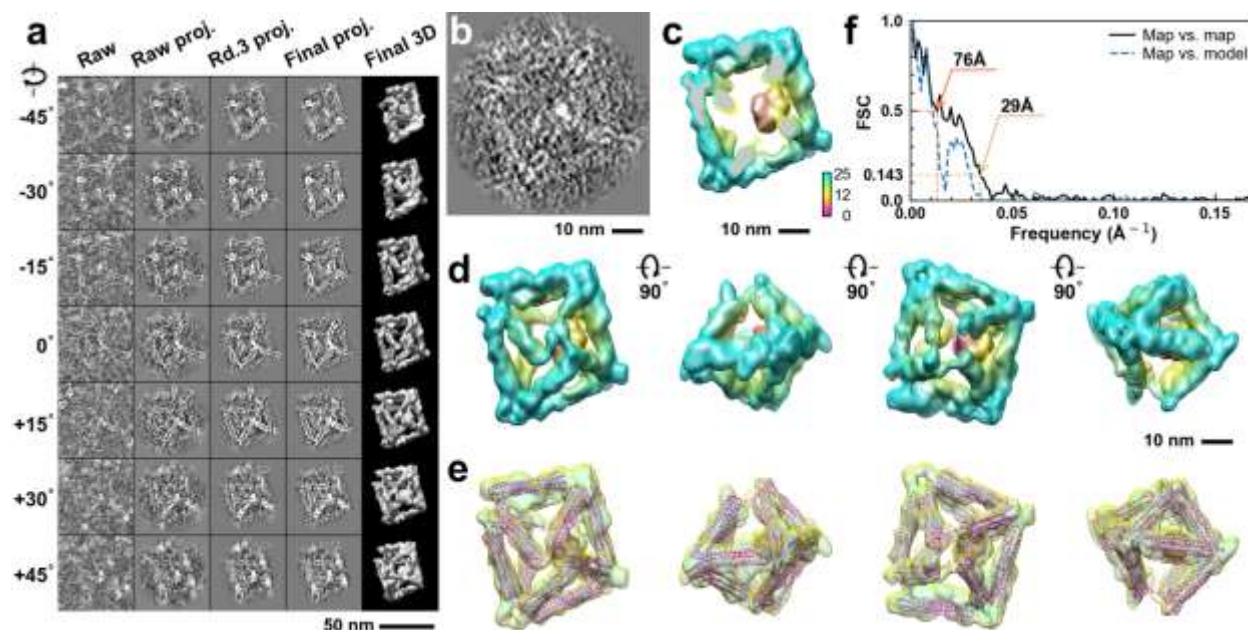

**Supplementary Fig. 22: IPET 3D reconstruction and model fitting of an individual unit-cell particle (Index: 014) within a 2D lattice with 100% ferritin loading.** **a**, Seven representative tilt images of a single unit-cell particle are shown in the first column (from left). The tilt images are aligned to a common center using IPET through iterative refinement. The projections of the raw, intermediate, and final 3D reconstruction at the corresponding angles are displayed in the subsequent four columns. **b**, A central cross-section (~23 nm thick) of the final reconstruction before masking is applied. **c**, 3D views of the central cross-section. **d**, Final 3D density map of this particle, viewed from four perpendicular directions. **e**, Final 3D reconstruction superimposed with the fitted model, viewed from four perpendicular directions. **f**, FSC analyses of the final map resolution using two methods: map-map FSC, where each map is reconstructed from one half of the images (even vs. odd tilt angle indices), and map-model FSC, where the model map is generated from the fitted model. Resolution assessments are provided based on tilt-based map-map and map-model FSC analyses at thresholds of FSC=0.5 and 0.143, respectively.

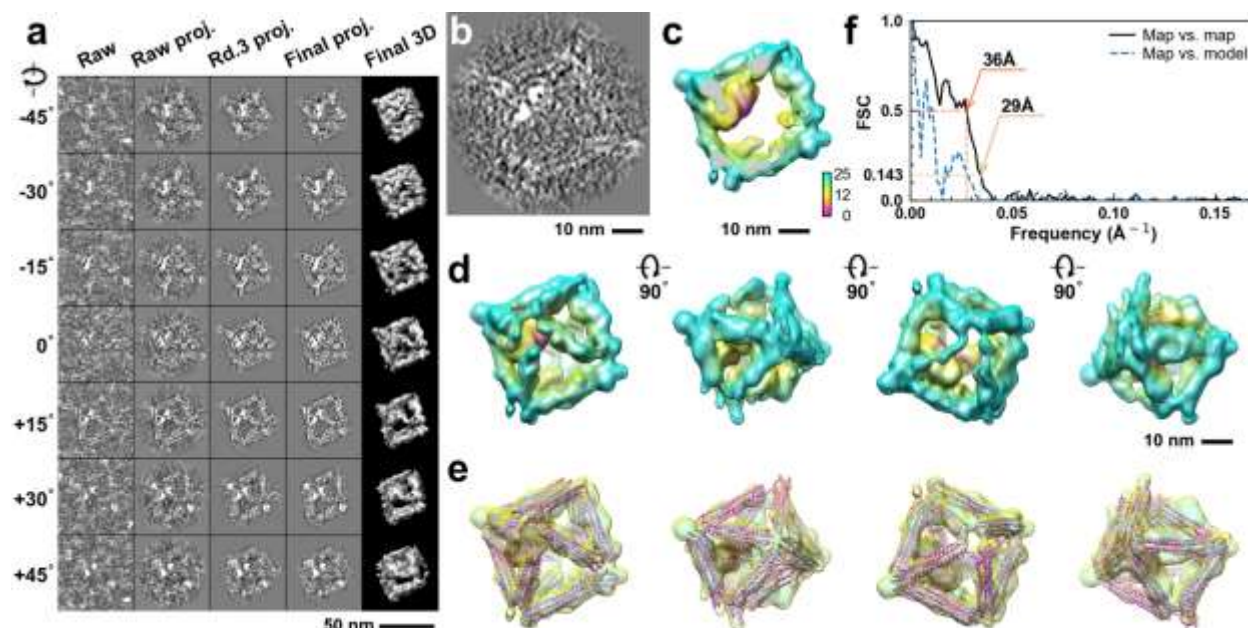

**Supplementary Fig. 23: IPET 3D reconstruction and model fitting of an individual unit-cell particle (Index: 015) within a 2D lattice with 100% ferritin loading.** **a**, Seven representative tilt images of a single unit-cell particle are shown in the first column (from left). The tilt images are aligned to a common center using IPET through iterative refinement. The projections of the raw, intermediate, and final 3D reconstruction at the corresponding angles are displayed in the subsequent four columns. **b**, A central cross-section (~23 nm thick) of the final reconstruction before masking is applied. **c**, 3D views of the central cross-section. **d**, Final 3D density map of this particle, viewed from four perpendicular directions. **e**, Final 3D reconstruction superimposed with the fitted model, viewed from four perpendicular directions. **f**, FSC analyses of the final map resolution using two methods: map-map FSC, where each map is reconstructed from one half of the images (even vs. odd tilt angle indices), and map-model FSC, where the model map is generated from the fitted model. Resolution assessments are provided based on tilt-based map-map and map-model FSC analyses at thresholds of FSC=0.5 and 0.143, respectively.

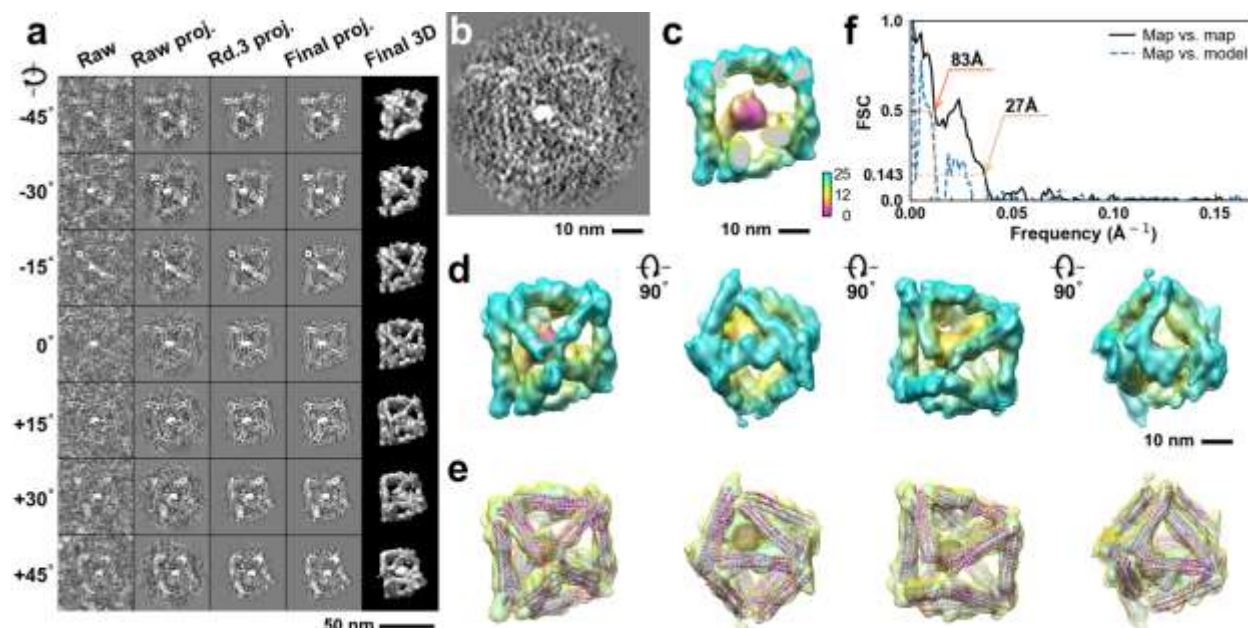

**Supplementary Fig. 24: IPET 3D reconstruction and model fitting of an individual unit-cell particle (Index: 016) within a 2D lattice with 100% ferritin loading.** **a**, Seven representative tilt images of a single unit-cell particle are shown in the first column (from left). The tilt images are aligned to a common center using IPET through iterative refinement. The projections of the raw, intermediate, and final 3D reconstruction at the corresponding angles are displayed in the subsequent four columns. **b**, A central cross-section (~23 nm thick) of the final reconstruction before masking is applied. **c**, 3D views of the central cross-section. **d**, Final 3D density map of this particle, viewed from four perpendicular directions. **e**, Final 3D reconstruction superimposed with the fitted model, viewed from four perpendicular directions. **f**, FSC analyses of the final map resolution using two methods: map-map FSC, where each map is reconstructed from one half of the images (even vs. odd tilt angle indices), and map-model FSC, where the model map is generated from the fitted model. Resolution assessments are provided based on tilt-based map-map and map-model FSC analyses at thresholds of FSC=0.5 and 0.143, respectively.

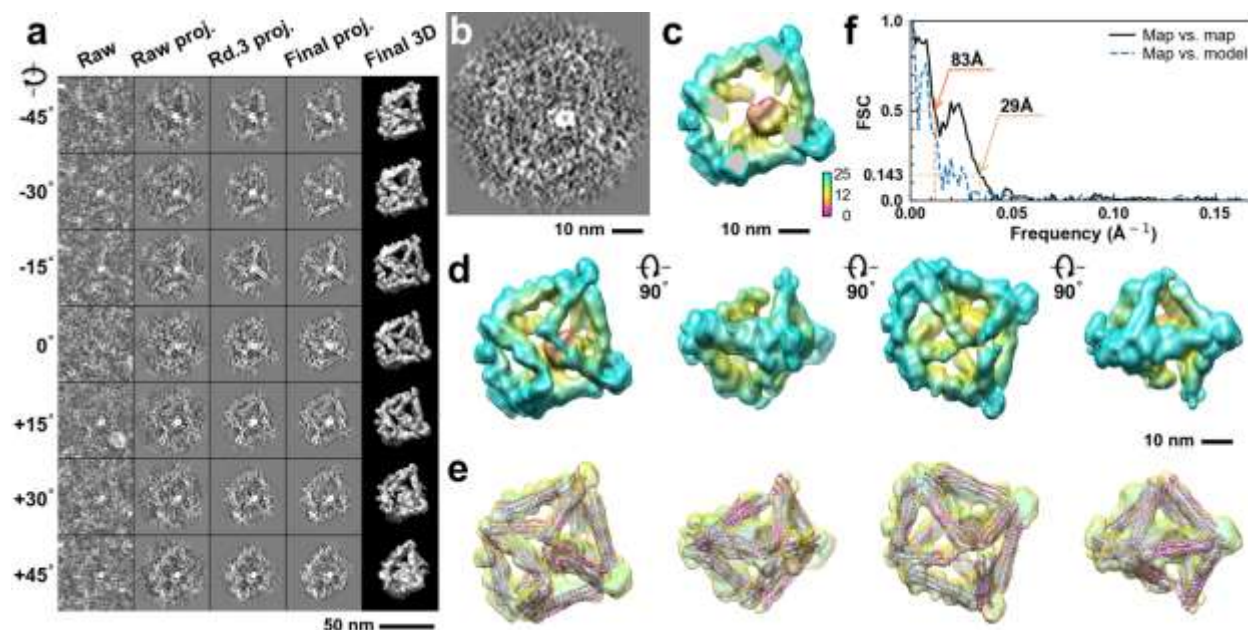

**Supplementary Fig. 25: IPET 3D reconstruction and model fitting of an individual unit-cell particle (Index: 017) within a 2D lattice with 100% ferritin loading.** **a**, Seven representative tilt images of a single unit-cell particle are shown in the first column (from left). The tilt images are aligned to a common center using IPET through iterative refinement. The projections of the raw, intermediate, and final 3D reconstruction at the corresponding angles are displayed in the subsequent four columns. **b**, A central cross-section (~23 nm thick) of the final reconstruction before masking is applied. **c**, 3D views of the central cross-section. **d**, Final 3D density map of this particle, viewed from four perpendicular directions. **e**, Final 3D reconstruction superimposed with the fitted model, viewed from four perpendicular directions. **f**, FSC analyses of the final map resolution using two methods: map-map FSC, where each map is reconstructed from one half of the images (even vs. odd tilt angle indices), and map-model FSC, where the model map is generated from the fitted model. Resolution assessments are provided based on tilt-based map-map and map-model FSC analyses at thresholds of FSC=0.5 and 0.143, respectively.



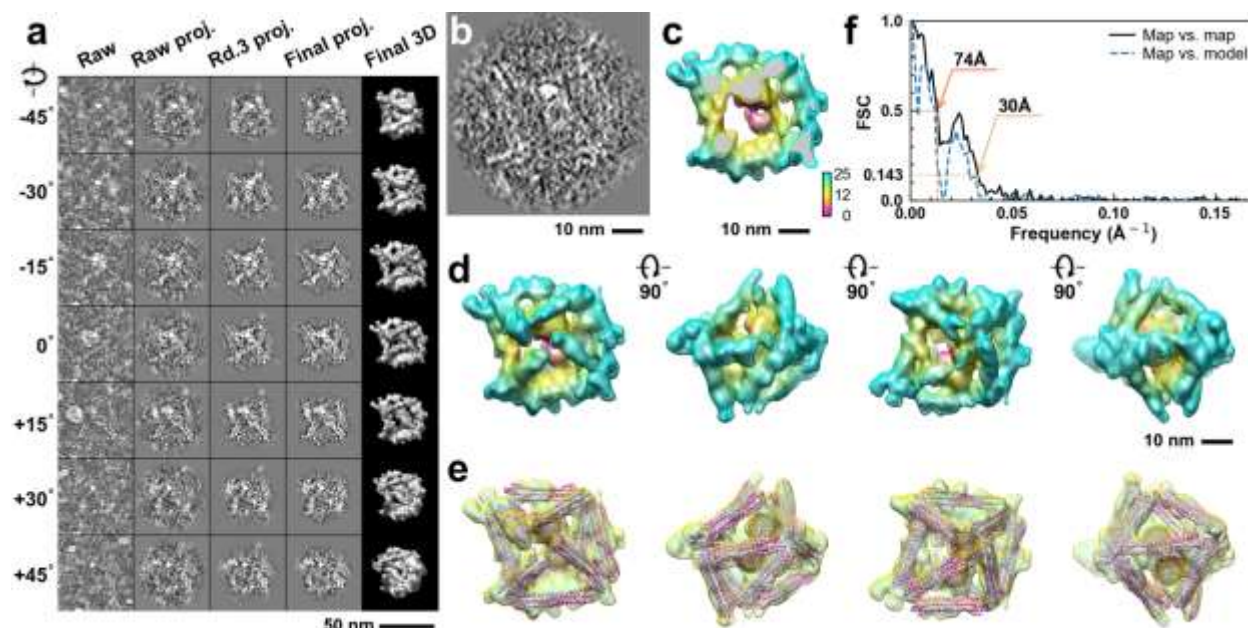

**Supplementary Fig. 26: IPET 3D reconstruction and model fitting of an individual unit-cell particle (Index: 018) within a 2D lattice with 100% ferritin loading.** **a**, Seven representative tilt images of a single unit-cell particle are shown in the first column (from left). The tilt images are aligned to a common center using IPET through iterative refinement. The projections of the raw, intermediate, and final 3D reconstruction at the corresponding angles are displayed in the subsequent four columns. **b**, A central cross-section (~23 nm thick) of the final reconstruction before masking is applied. **c**, 3D views of the central cross-section. **d**, Final 3D density map of this particle, viewed from four perpendicular directions. **e**, Final 3D reconstruction superimposed with the fitted model, viewed from four perpendicular directions. **f**, FSC analyses of the final map resolution using two methods: map-map FSC, where each map is reconstructed from one half of the images (even vs. odd tilt angle indices), and map-model FSC, where the model map is generated from the fitted model. Resolution assessments are provided based on tilt-based map-map and map-model FSC analyses at thresholds of FSC=0.5 and 0.143, respectively.



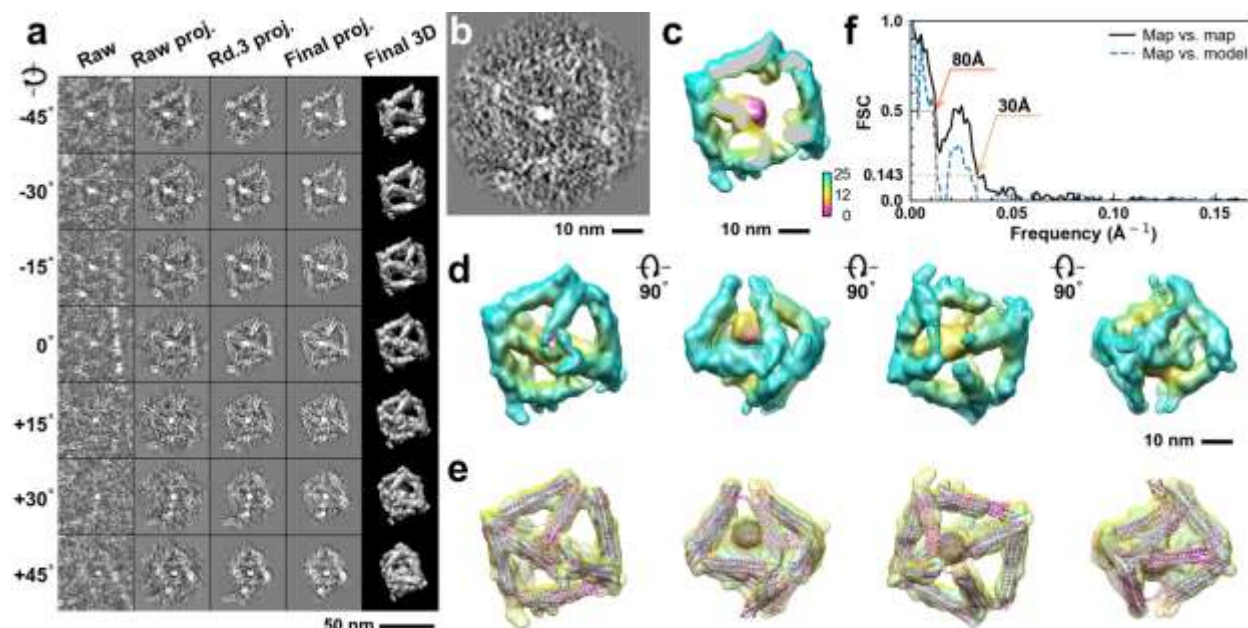

**Supplementary Fig. 27: IPET 3D reconstruction and model fitting of an individual unit-cell particle (Index: 019) within a 2D lattice with 100% ferritin loading.** **a**, Seven representative tilt images of a single unit-cell particle are shown in the first column (from left). The tilt images are aligned to a common center using IPET through iterative refinement. The projections of the raw, intermediate, and final 3D reconstruction at the corresponding angles are displayed in the subsequent four columns. **b**, A central cross-section (~23 nm thick) of the final reconstruction before masking is applied. **c**, 3D views of the central cross-section. **d**, Final 3D density map of this particle, viewed from four perpendicular directions. **e**, Final 3D reconstruction superimposed with the fitted model, viewed from four perpendicular directions. **f**, FSC analyses of the final map resolution using two methods: map-map FSC, where each map is reconstructed from one half of the images (even vs. odd tilt angle indices), and map-model FSC, where the model map is generated from the fitted model. Resolution assessments are provided based on tilt-based map-map and map-model FSC analyses at thresholds of FSC=0.5 and 0.143, respectively.

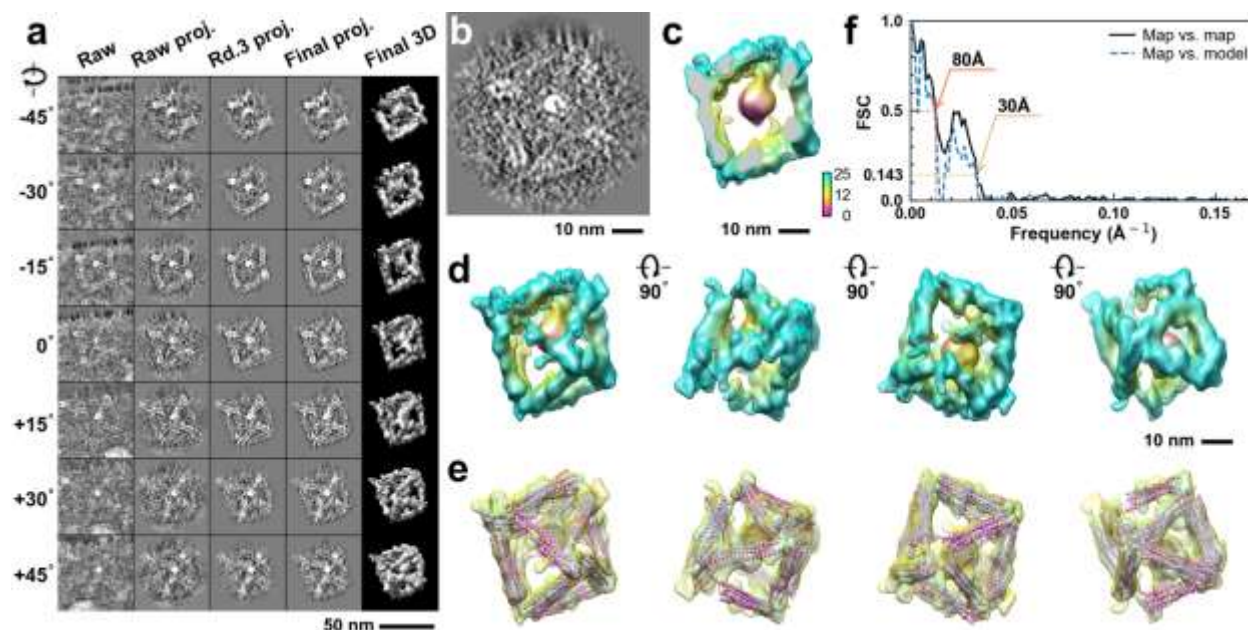

**Supplementary Fig. 28: IPET 3D reconstruction and model fitting of an individual unit-cell particle (Index: 020) within a 2D lattice with 100% ferritin loading.** **a**, Seven representative tilt images of a single unit-cell particle are shown in the first column (from left). The tilt images are aligned to a common center using IPET through iterative refinement. The projections of the raw, intermediate, and final 3D reconstruction at the corresponding angles are displayed in the subsequent four columns. **b**, A central cross-section (~23 nm thick) of the final reconstruction before masking is applied. **c**, 3D views of the central cross-section. **d**, Final 3D density map of this particle, viewed from four perpendicular directions. **e**, Final 3D reconstruction superimposed with the fitted model, viewed from four perpendicular directions. **f**, FSC analyses of the final map resolution using two methods: map-map FSC, where each map is reconstructed from one half of the images (even vs. odd tilt angle indices), and map-model FSC, where the model map is generated from the fitted model. Resolution assessments are provided based on tilt-based map-map and map-model FSC analyses at thresholds of FSC=0.5 and 0.143, respectively.

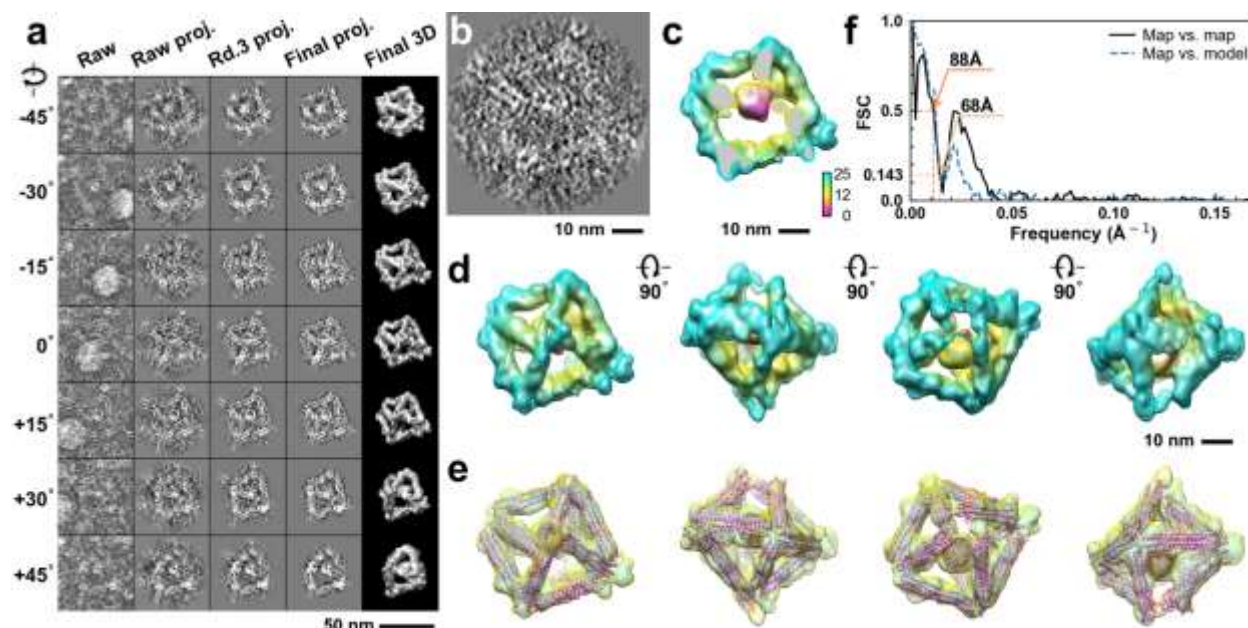

**Supplementary Fig. 29: IPET 3D reconstruction and model fitting of an individual unit-cell particle (Index: 021) within a 2D lattice with 100% ferritin loading.** **a**, Seven representative tilt images of a single unit-cell particle are shown in the first column (from left). The tilt images are aligned to a common center using IPET through iterative refinement. The projections of the raw, intermediate, and final 3D reconstruction at the corresponding angles are displayed in the subsequent four columns. **b**, A central cross-section (~23 nm thick) of the final reconstruction before masking is applied. **c**, 3D views of the central cross-section. **d**, Final 3D density map of this particle, viewed from four perpendicular directions. **e**, Final 3D reconstruction superimposed with the fitted model, viewed from four perpendicular directions. **f**, FSC analyses of the final map resolution using two methods: map-map FSC, where each map is reconstructed from one half of the images (even vs. odd tilt angle indices), and map-model FSC, where the model map is generated from the fitted model. Resolution assessments are provided based on tilt-based map-map and map-model FSC analyses at thresholds of FSC=0.5 and 0.143, respectively.

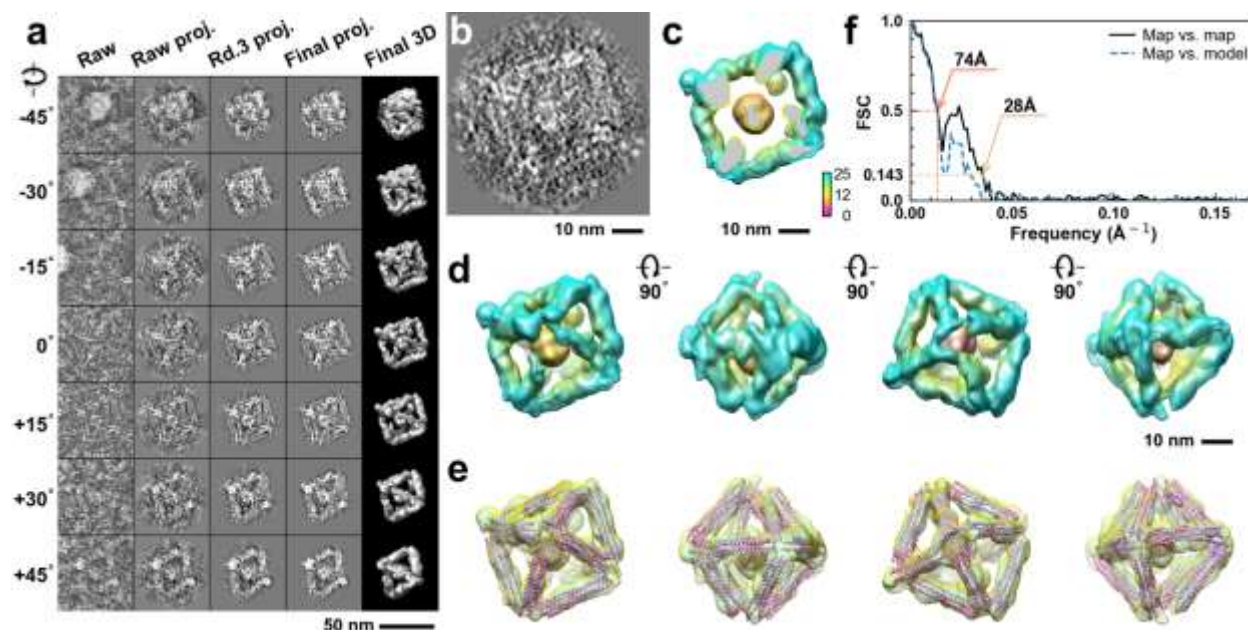

**Supplementary Fig. 30: IPET 3D reconstruction and model fitting of an individual unit-cell particle (Index: 022) within a 2D lattice with 100% ferritin loading.** **a**, Seven representative tilt images of a single unit-cell particle are shown in the first column (from left). The tilt images are aligned to a common center using IPET through iterative refinement. The projections of the raw, intermediate, and final 3D reconstruction at the corresponding angles are displayed in the subsequent four columns. **b**, A central cross-section (~23 nm thick) of the final reconstruction before masking is applied. **c**, 3D views of the central cross-section. **d**, Final 3D density map of this particle, viewed from four perpendicular directions. **e**, Final 3D reconstruction superimposed with the fitted model, viewed from four perpendicular directions. **f**, FSC analyses of the final map resolution using two methods: map-map FSC, where each map is reconstructed from one half of the images (even vs. odd tilt angle indices), and map-model FSC, where the model map is generated from the fitted model. Resolution assessments are provided based on tilt-based map-map and map-model FSC analyses at thresholds of FSC=0.5 and 0.143, respectively.



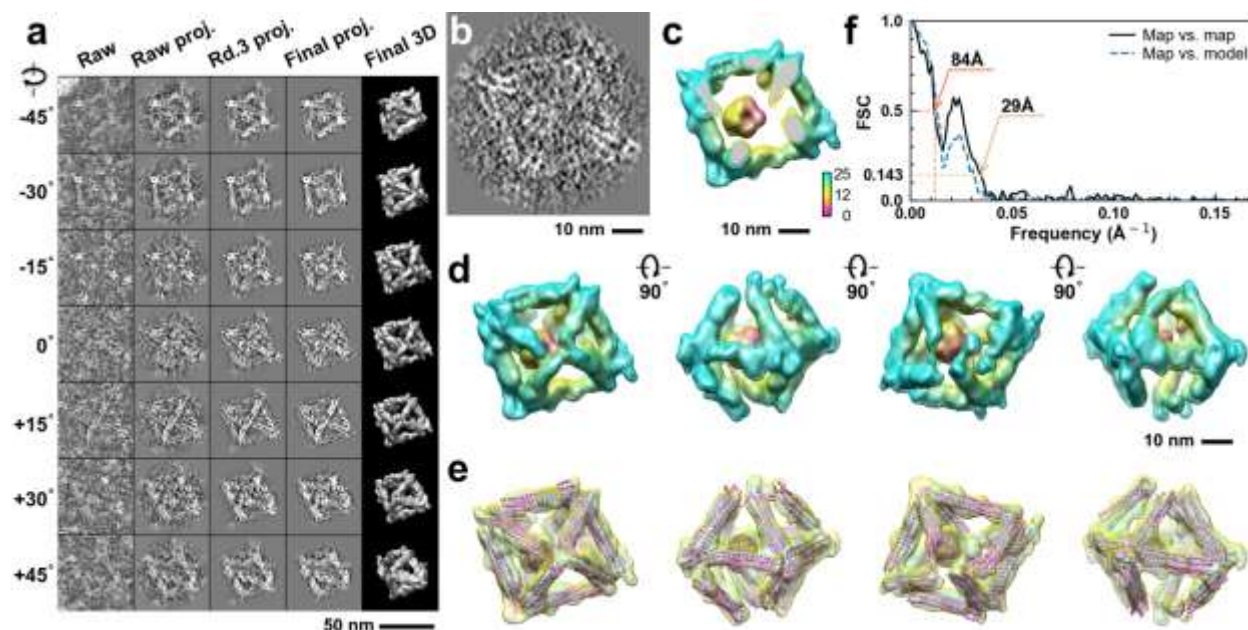

**Supplementary Fig. 31: IPET 3D reconstruction and model fitting of an individual unit-cell particle (Index: 023) within a 2D lattice with 100% ferritin loading.** **a**, Seven representative tilt images of a single unit-cell particle are shown in the first column (from left). The tilt images are aligned to a common center using IPET through iterative refinement. The projections of the raw, intermediate, and final 3D reconstruction at the corresponding angles are displayed in the subsequent four columns. **b**, A central cross-section (~23 nm thick) of the final reconstruction before masking is applied. **c**, 3D views of the central cross-section. **d**, Final 3D density map of this particle, viewed from four perpendicular directions. **e**, Final 3D reconstruction superimposed with the fitted model, viewed from four perpendicular directions. **f**, FSC analyses of the final map resolution using two methods: map-map FSC, where each map is reconstructed from one half of the images (even vs. odd tilt angle indices), and map-model FSC, where the model map is generated from the fitted model. Resolution assessments are provided based on tilt-based map-map and map-model FSC analyses at thresholds of FSC=0.5 and 0.143, respectively.



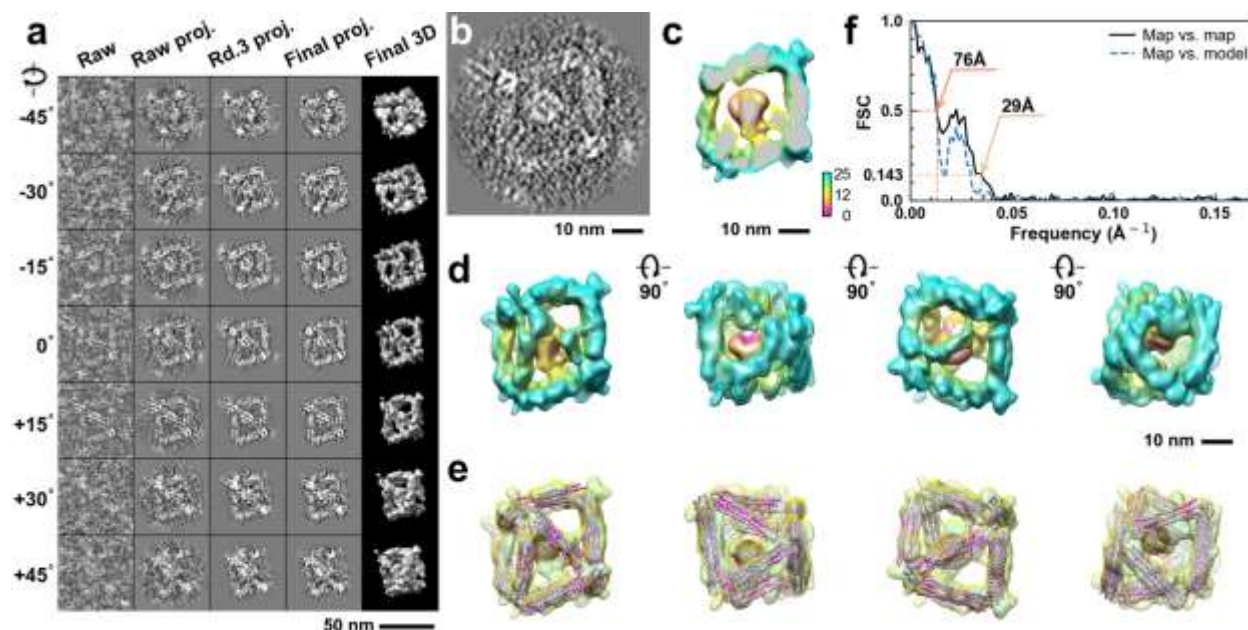

**Supplementary Fig. 32: IPET 3D reconstruction and model fitting of an individual unit-cell particle (Index: 024) within a 2D lattice with 100% ferritin loading.** **a**, Seven representative tilt images of a single unit-cell particle are shown in the first column (from left). The tilt images are aligned to a common center using IPET through iterative refinement. The projections of the raw, intermediate, and final 3D reconstruction at the corresponding angles are displayed in the subsequent four columns. **b**, A central cross-section (~23 nm thick) of the final reconstruction before masking is applied. **c**, 3D views of the central cross-section. **d**, Final 3D density map of this particle, viewed from four perpendicular directions. **e**, Final 3D reconstruction superimposed with the fitted model, viewed from four perpendicular directions. **f**, FSC analyses of the final map resolution using two methods: map-map FSC, where each map is reconstructed from one half of the images (even vs. odd tilt angle indices), and map-model FSC, where the model map is generated from the fitted model. Resolution assessments are provided based on tilt-based map-map and map-model FSC analyses at thresholds of FSC=0.5 and 0.143, respectively.

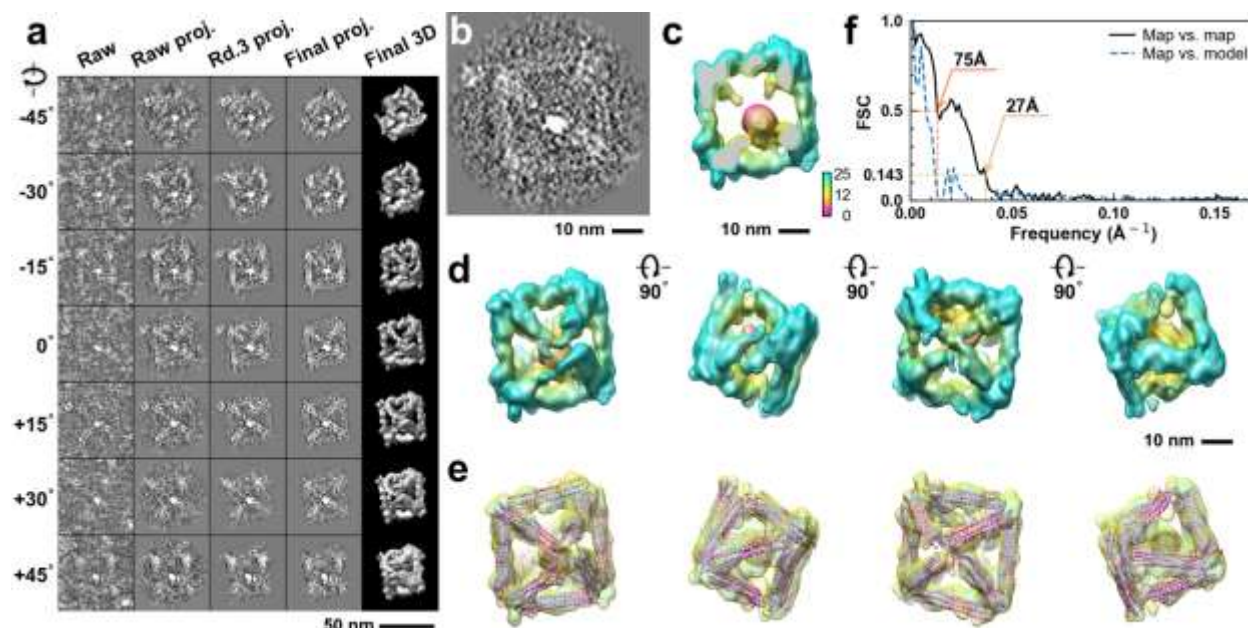

**Supplementary Fig. 33: IPET 3D reconstruction and model fitting of an individual unit-cell particle (Index: 025) within a 2D lattice with 100% ferritin loading.** **a**, Seven representative tilt images of a single unit-cell particle are shown in the first column (from left). The tilt images are aligned to a common center using IPET through iterative refinement. The projections of the raw, intermediate, and final 3D reconstruction at the corresponding angles are displayed in the subsequent four columns. **b**, A central cross-section (~23 nm thick) of the final reconstruction before masking is applied. **c**, 3D views of the central cross-section. **d**, Final 3D density map of this particle, viewed from four perpendicular directions. **e**, Final 3D reconstruction superimposed with the fitted model, viewed from four perpendicular directions. **f**, FSC analyses of the final map resolution using two methods: map-map FSC, where each map is reconstructed from one half of the images (even vs. odd tilt angle indices), and map-model FSC, where the model map is generated from the fitted model. Resolution assessments are provided based on tilt-based map-map and map-model FSC analyses at thresholds of FSC=0.5 and 0.143, respectively.

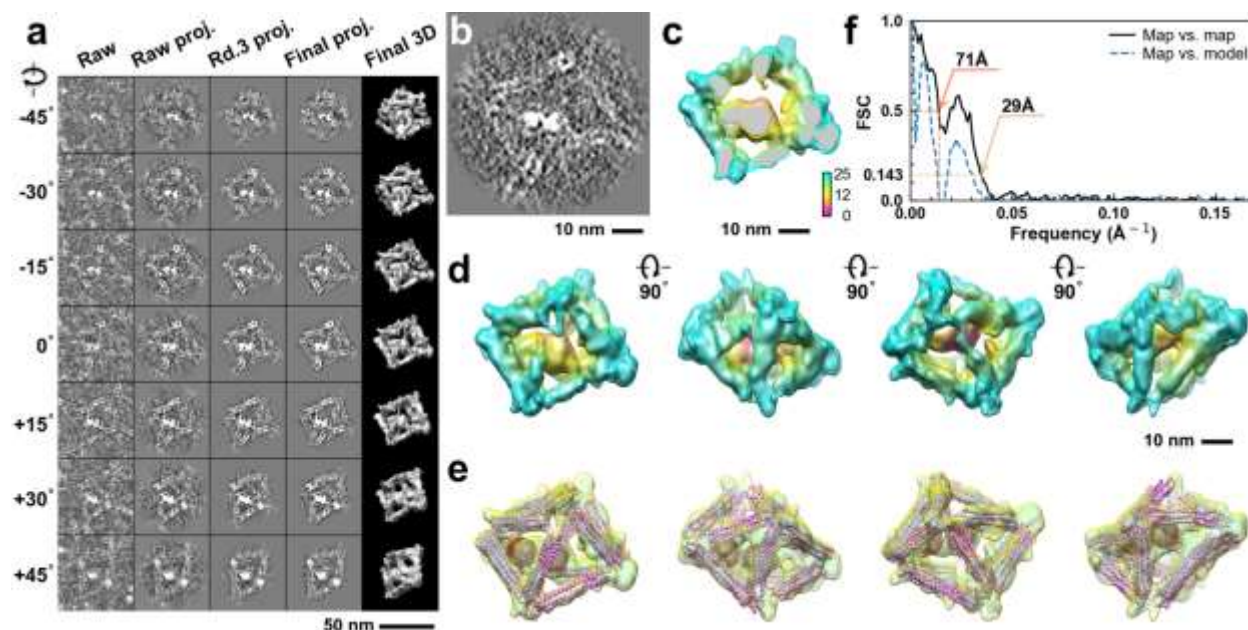

**Supplementary Fig. 34: IPET 3D reconstruction and model fitting of an individual unit-cell particle (Index: 026) within a 2D lattice with 100% ferritin loading.** **a**, Seven representative tilt images of a single unit-cell particle are shown in the first column (from left). The tilt images are aligned to a common center using IPET through iterative refinement. The projections of the raw, intermediate, and final 3D reconstruction at the corresponding angles are displayed in the subsequent four columns. **b**, A central cross-section (~23 nm thick) of the final reconstruction before masking is applied. **c**, 3D views of the central cross-section. **d**, Final 3D density map of this particle, viewed from four perpendicular directions. **e**, Final 3D reconstruction superimposed with the fitted model, viewed from four perpendicular directions. **f**, FSC analyses of the final map resolution using two methods: map-map FSC, where each map is reconstructed from one half of the images (even vs. odd tilt angle indices), and map-model FSC, where the model map is generated from the fitted model. Resolution assessments are provided based on tilt-based map-map and map-model FSC analyses at thresholds of FSC=0.5 and 0.143, respectively.

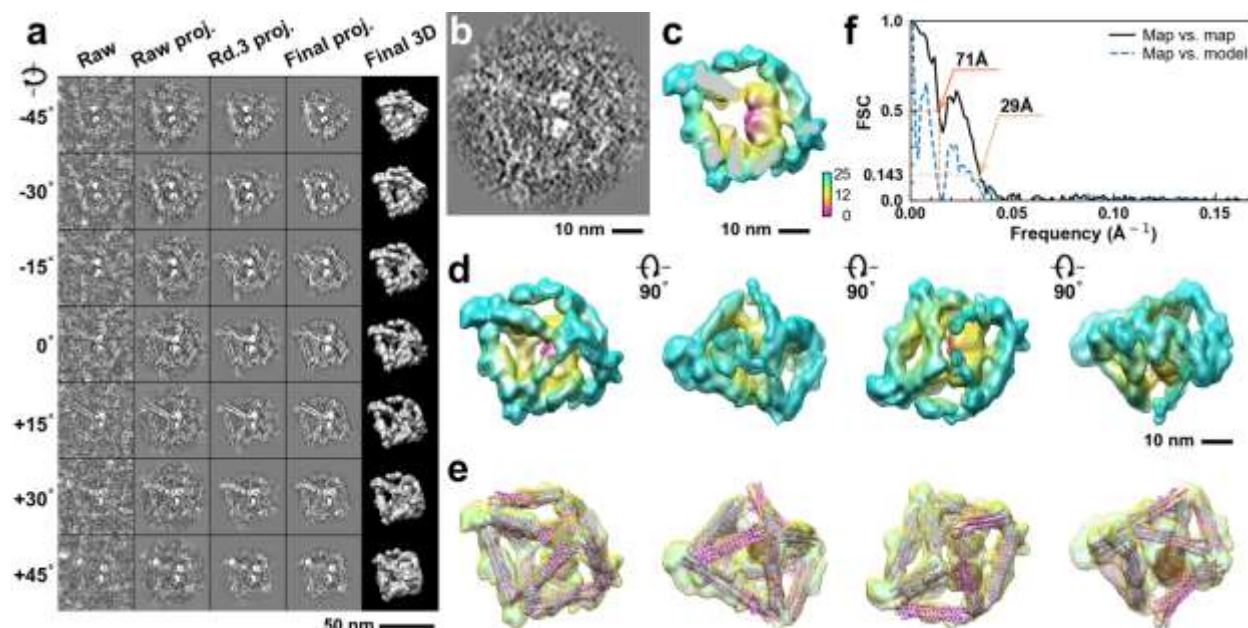

**Supplementary Fig. 35: IPET 3D reconstruction and model fitting of an individual unit-cell particle (Index: 027) within a 2D lattice with 100% ferritin loading.** **a**, Seven representative tilt images of a single unit-cell particle are shown in the first column (from left). The tilt images are aligned to a common center using IPET through iterative refinement. The projections of the raw, intermediate, and final 3D reconstruction at the corresponding angles are displayed in the subsequent four columns. **b**, A central cross-section (~23 nm thick) of the final reconstruction before masking is applied. **c**, 3D views of the central cross-section. **d**, Final 3D density map of this particle, viewed from four perpendicular directions. **e**, Final 3D reconstruction superimposed with the fitted model, viewed from four perpendicular directions. **f**, FSC analyses of the final map resolution using two methods: map-map FSC, where each map is reconstructed from one half of the images (even vs. odd tilt angle indices), and map-model FSC, where the model map is generated from the fitted model. Resolution assessments are provided based on tilt-based map-map and map-model FSC analyses at thresholds of FSC=0.5 and 0.143, respectively.



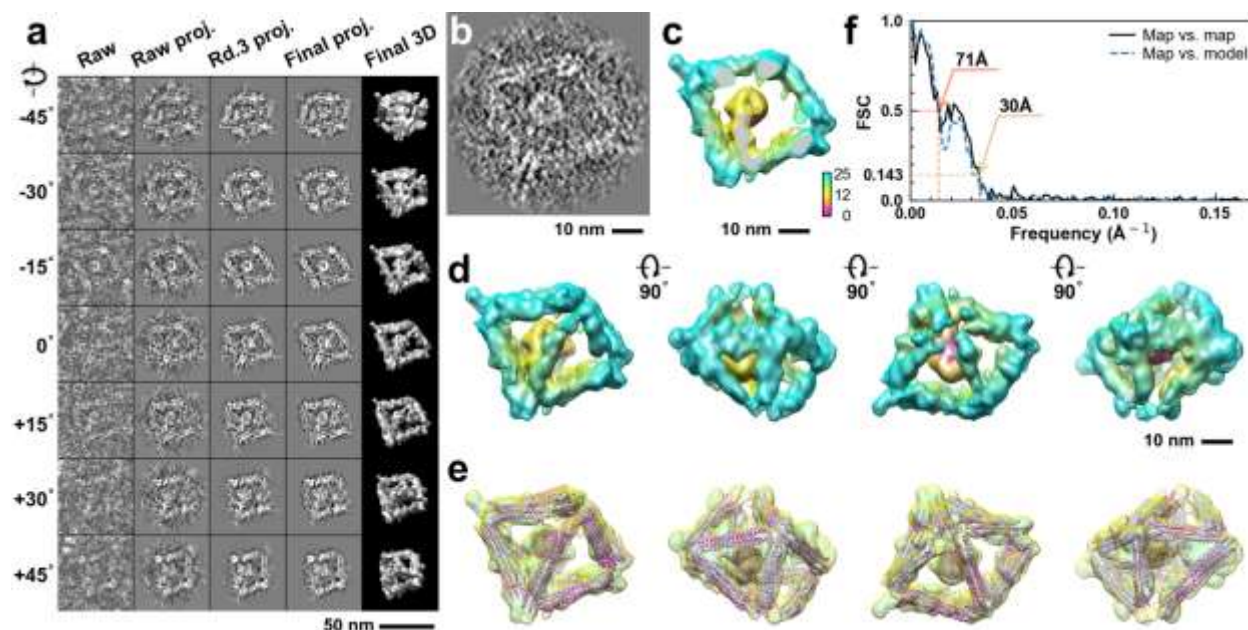

**Supplementary Fig. 36: IPET 3D reconstruction and model fitting of an individual unit-cell particle (Index: 028) within a 2D lattice with 100% ferritin loading.** **a**, Seven representative tilt images of a single unit-cell particle are shown in the first column (from left). The tilt images are aligned to a common center using IPET through iterative refinement. The projections of the raw, intermediate, and final 3D reconstruction at the corresponding angles are displayed in the subsequent four columns. **b**, A central cross-section (~23 nm thick) of the final reconstruction before masking is applied. **c**, 3D views of the central cross-section. **d**, Final 3D density map of this particle, viewed from four perpendicular directions. **e**, Final 3D reconstruction superimposed with the fitted model, viewed from four perpendicular directions. **f**, FSC analyses of the final map resolution using two methods: map-map FSC, where each map is reconstructed from one half of the images (even vs. odd tilt angle indices), and map-model FSC, where the model map is generated from the fitted model. Resolution assessments are provided based on tilt-based map-map and map-model FSC analyses at thresholds of FSC=0.5 and 0.143, respectively.



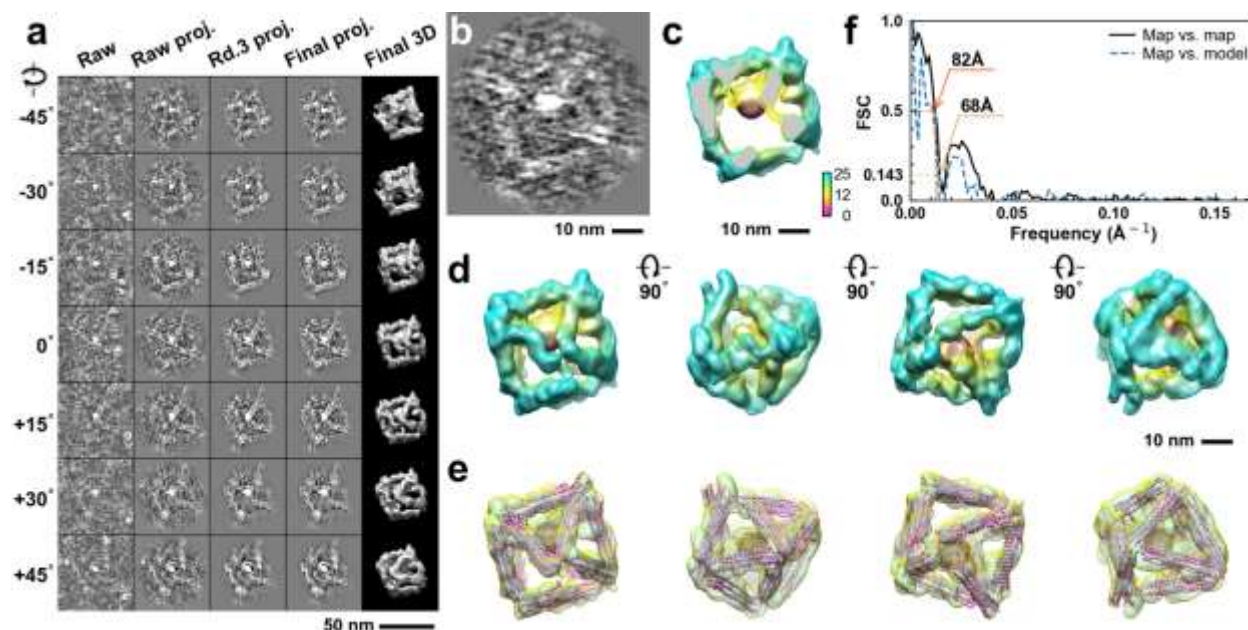

**Supplementary Fig. 37: IPET 3D reconstruction and model fitting of an individual unit-cell particle (Index: 029) within a 2D lattice with 100% ferritin loading.** **a**, Seven representative tilt images of a single unit-cell particle are shown in the first column (from left). The tilt images are aligned to a common center using IPET through iterative refinement. The projections of the raw, intermediate, and final 3D reconstruction at the corresponding angles are displayed in the subsequent four columns. **b**, A central cross-section (~23 nm thick) of the final reconstruction before masking is applied. **c**, 3D views of the central cross-section. **d**, Final 3D density map of this particle, viewed from four perpendicular directions. **e**, Final 3D reconstruction superimposed with the fitted model, viewed from four perpendicular directions. **f**, FSC analyses of the final map resolution using two methods: map-map FSC, where each map is reconstructed from one half of the images (even vs. odd tilt angle indices), and map-model FSC, where the model map is generated from the fitted model. Resolution assessments are provided based on tilt-based map-map and map-model FSC analyses at thresholds of FSC=0.5 and 0.143, respectively.

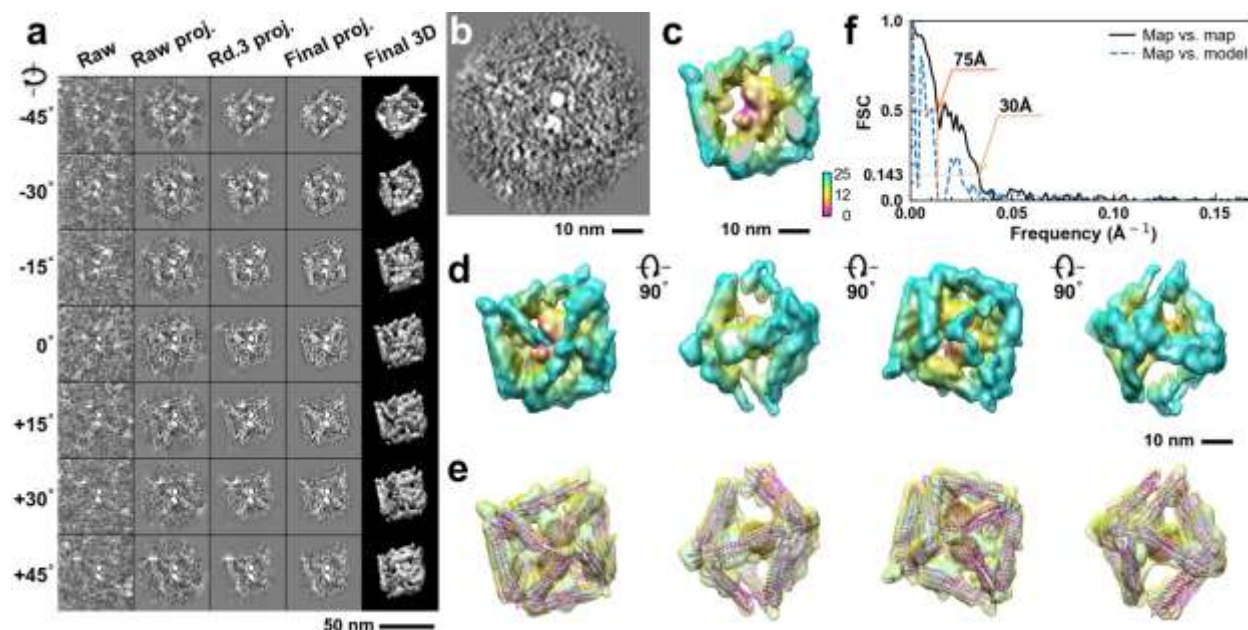

**Supplementary Fig. 38: IPET 3D reconstruction and model fitting of an individual unit-cell particle (Index: 030) within a 2D lattice with 100% ferritin loading.** **a**, Seven representative tilt images of a single unit-cell particle are shown in the first column (from left). The tilt images are aligned to a common center using IPET through iterative refinement. The projections of the raw, intermediate, and final 3D reconstruction at the corresponding angles are displayed in the subsequent four columns. **b**, A central cross-section (~23 nm thick) of the final reconstruction before masking is applied. **c**, 3D views of the central cross-section. **d**, Final 3D density map of this particle, viewed from four perpendicular directions. **e**, Final 3D reconstruction superimposed with the fitted model, viewed from four perpendicular directions. **f**, FSC analyses of the final map resolution using two methods: map-map FSC, where each map is reconstructed from one half of the images (even vs. odd tilt angle indices), and map-model FSC, where the model map is generated from the fitted model. Resolution assessments are provided based on tilt-based map-map and map-model FSC analyses at thresholds of FSC=0.5 and 0.143, respectively.

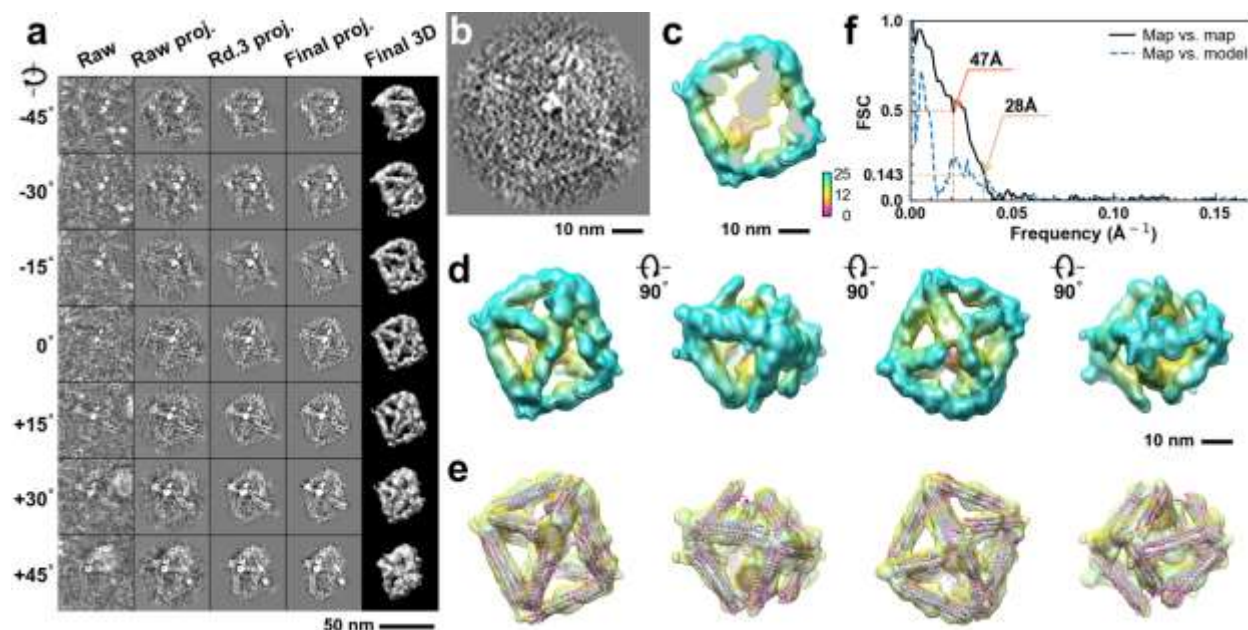

**Supplementary Fig. 39: IPET 3D reconstruction and model fitting of an individual unit-cell particle (Index: 031) within a 2D lattice with 100% ferritin loading.** **a**, Seven representative tilt images of a single unit-cell particle are shown in the first column (from left). The tilt images are aligned to a common center using IPET through iterative refinement. The projections of the raw, intermediate, and final 3D reconstruction at the corresponding angles are displayed in the subsequent four columns. **b**, A central cross-section (~23 nm thick) of the final reconstruction before masking is applied. **c**, 3D views of the central cross-section. **d**, Final 3D density map of this particle, viewed from four perpendicular directions. **e**, Final 3D reconstruction superimposed with the fitted model, viewed from four perpendicular directions. **f**, FSC analyses of the final map resolution using two methods: map-map FSC, where each map is reconstructed from one half of the images (even vs. odd tilt angle indices), and map-model FSC, where the model map is generated from the fitted model. Resolution assessments are provided based on tilt-based map-map and map-model FSC analyses at thresholds of FSC=0.5 and 0.143, respectively.

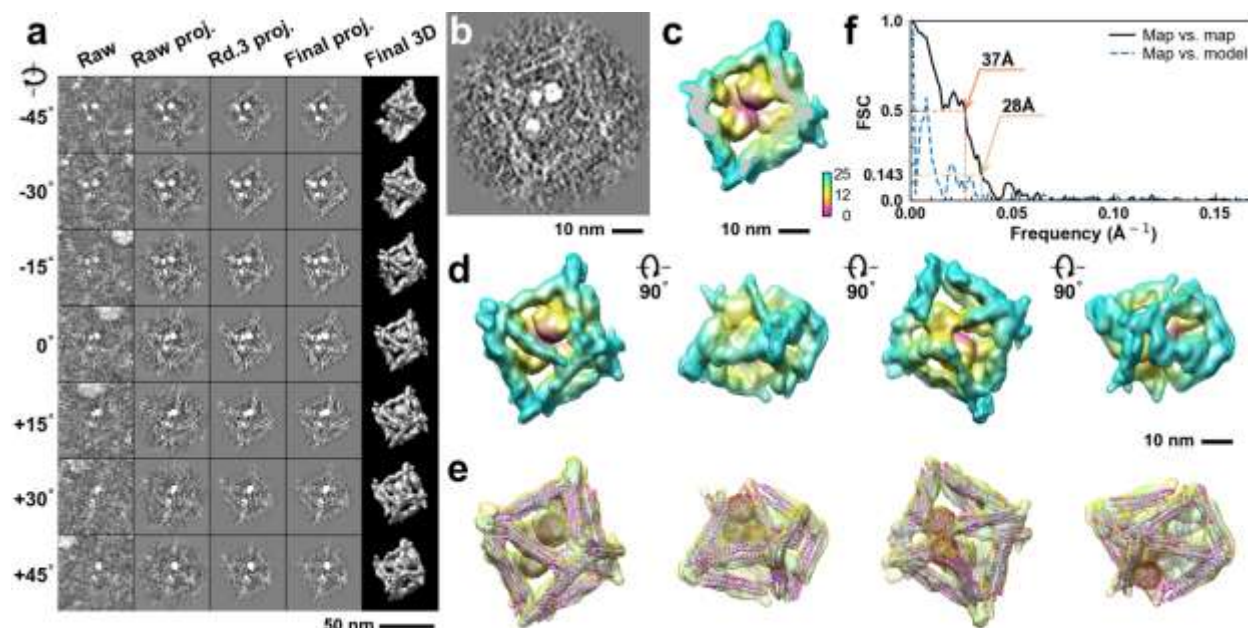

**Supplementary Fig. 40: IPET 3D reconstruction and model fitting of an individual unit-cell particle (Index: 032) within a 2D lattice with 100% ferritin loading.** **a**, Seven representative tilt images of a single unit-cell particle are shown in the first column (from left). The tilt images are aligned to a common center using IPET through iterative refinement. The projections of the raw, intermediate, and final 3D reconstruction at the corresponding angles are displayed in the subsequent four columns. **b**, A central cross-section (~23 nm thick) of the final reconstruction before masking is applied. **c**, 3D views of the central cross-section. **d**, Final 3D density map of this particle, viewed from four perpendicular directions. **e**, Final 3D reconstruction superimposed with the fitted model, viewed from four perpendicular directions. **f**, FSC analyses of the final map resolution using two methods: map-map FSC, where each map is reconstructed from one half of the images (even vs. odd tilt angle indices), and map-model FSC, where the model map is generated from the fitted model. Resolution assessments are provided based on tilt-based map-map and map-model FSC analyses at thresholds of FSC=0.5 and 0.143, respectively.



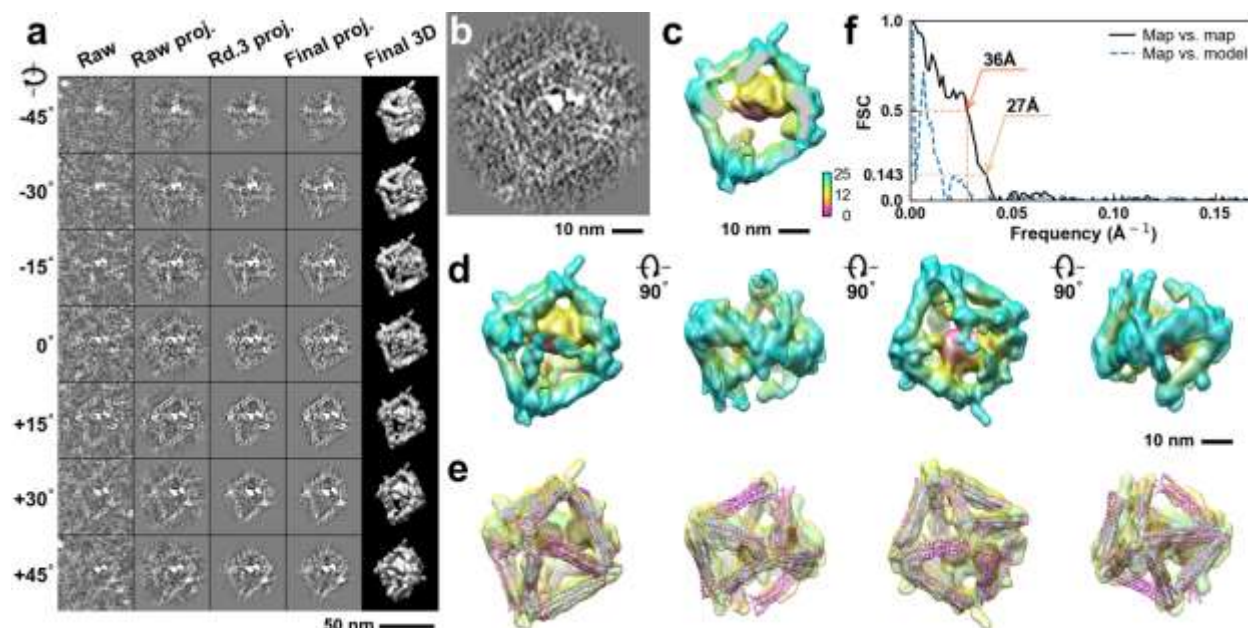

**Supplementary Fig. 41: IPET 3D reconstruction and model fitting of an individual unit-cell particle (Index: 033) within a 2D lattice with 100% ferritin loading.** **a**, Seven representative tilt images of a single unit-cell particle are shown in the first column (from left). The tilt images are aligned to a common center using IPET through iterative refinement. The projections of the raw, intermediate, and final 3D reconstruction at the corresponding angles are displayed in the subsequent four columns. **b**, A central cross-section (~23 nm thick) of the final reconstruction before masking is applied. **c**, 3D views of the central cross-section. **d**, Final 3D density map of this particle, viewed from four perpendicular directions. **e**, Final 3D reconstruction superimposed with the fitted model, viewed from four perpendicular directions. **f**, FSC analyses of the final map resolution using two methods: map-map FSC, where each map is reconstructed from one half of the images (even vs. odd tilt angle indices), and map-model FSC, where the model map is generated from the fitted model. Resolution assessments are provided based on tilt-based map-map and map-model FSC analyses at thresholds of FSC=0.5 and 0.143, respectively.



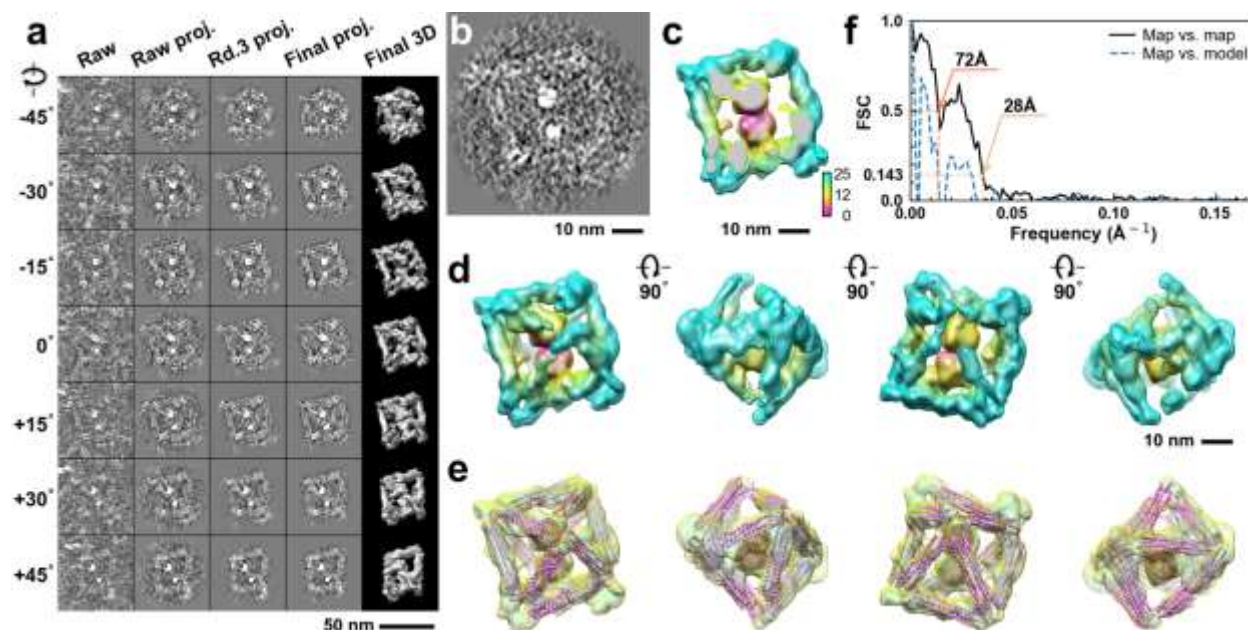

**Supplementary Fig. 42: IPET 3D reconstruction and model fitting of an individual unit-cell particle (Index: 034) within a 2D lattice with 100% ferritin loading.** **a**, Seven representative tilt images of a single unit-cell particle are shown in the first column (from left). The tilt images are aligned to a common center using IPET through iterative refinement. The projections of the raw, intermediate, and final 3D reconstruction at the corresponding angles are displayed in the subsequent four columns. **b**, A central cross-section (~23 nm thick) of the final reconstruction before masking is applied. **c**, 3D views of the central cross-section. **d**, Final 3D density map of this particle, viewed from four perpendicular directions. **e**, Final 3D reconstruction superimposed with the fitted model, viewed from four perpendicular directions. **f**, FSC analyses of the final map resolution using two methods: map-map FSC, where each map is reconstructed from one half of the images (even vs. odd tilt angle indices), and map-model FSC, where the model map is generated from the fitted model. Resolution assessments are provided based on tilt-based map-map and map-model FSC analyses at thresholds of FSC=0.5 and 0.143, respectively.

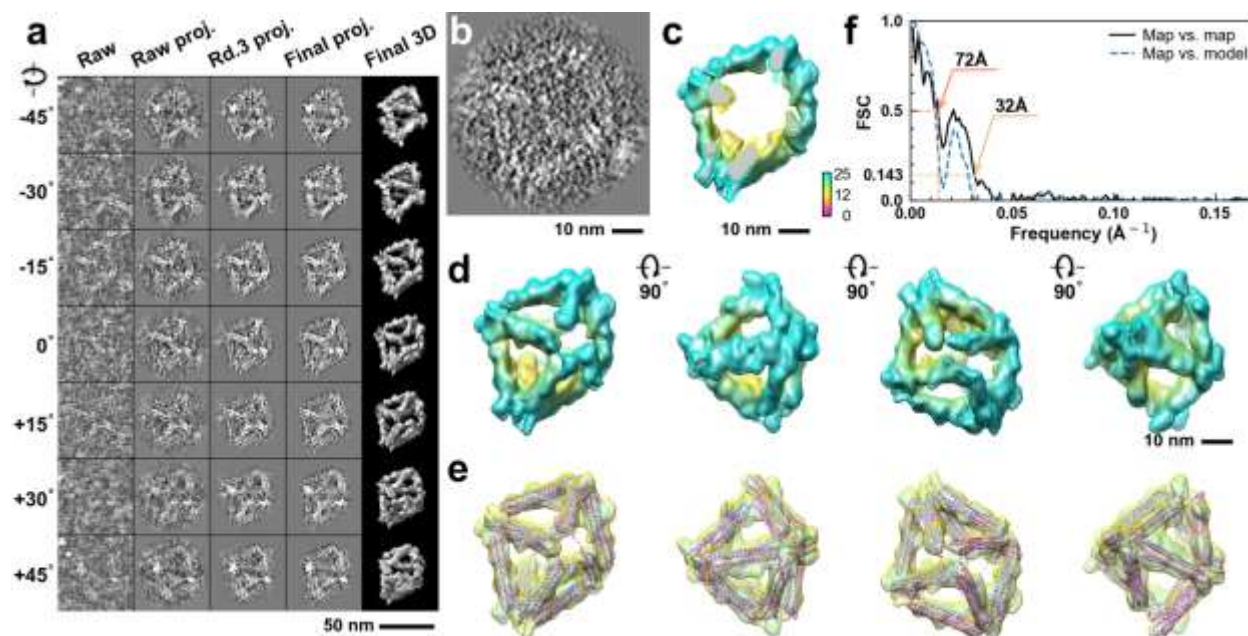

**Supplementary Fig. 43: IPET 3D reconstruction and model fitting of an individual unit-cell particle (Index: 035) within a 2D lattice with 100% ferritin loading.** **a**, Seven representative tilt images of a single unit-cell particle are shown in the first column (from left). The tilt images are aligned to a common center using IPET through iterative refinement. The projections of the raw, intermediate, and final 3D reconstruction at the corresponding angles are displayed in the subsequent four columns. **b**, A central cross-section (~23 nm thick) of the final reconstruction before masking is applied. **c**, 3D views of the central cross-section. **d**, Final 3D density map of this particle, viewed from four perpendicular directions. **e**, Final 3D reconstruction superimposed with the fitted model, viewed from four perpendicular directions. **f**, FSC analyses of the final map resolution using two methods: map-map FSC, where each map is reconstructed from one half of the images (even vs. odd tilt angle indices), and map-model FSC, where the model map is generated from the fitted model. Resolution assessments are provided based on tilt-based map-map and map-model FSC analyses at thresholds of FSC=0.5 and 0.143, respectively.

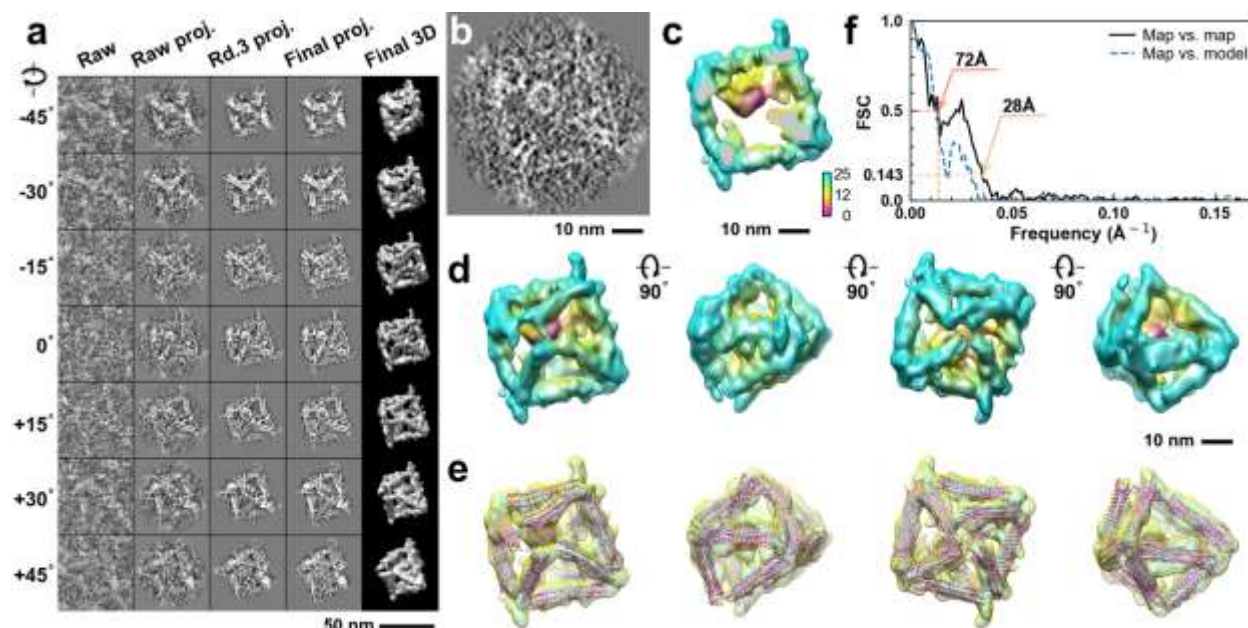

**Supplementary Fig. 44: IPET 3D reconstruction and model fitting of an individual unit-cell particle (Index: 036) within a 2D lattice with 100% ferritin loading.** **a**, Seven representative tilt images of a single unit-cell particle are shown in the first column (from left). The tilt images are aligned to a common center using IPET through iterative refinement. The projections of the raw, intermediate, and final 3D reconstruction at the corresponding angles are displayed in the subsequent four columns. **b**, A central cross-section (~23 nm thick) of the final reconstruction before masking is applied. **c**, 3D views of the central cross-section. **d**, Final 3D density map of this particle, viewed from four perpendicular directions. **e**, Final 3D reconstruction superimposed with the fitted model, viewed from four perpendicular directions. **f**, FSC analyses of the final map resolution using two methods: map-map FSC, where each map is reconstructed from one half of the images (even vs. odd tilt angle indices), and map-model FSC, where the model map is generated from the fitted model. Resolution assessments are provided based on tilt-based map-map and map-model FSC analyses at thresholds of FSC=0.5 and 0.143, respectively.

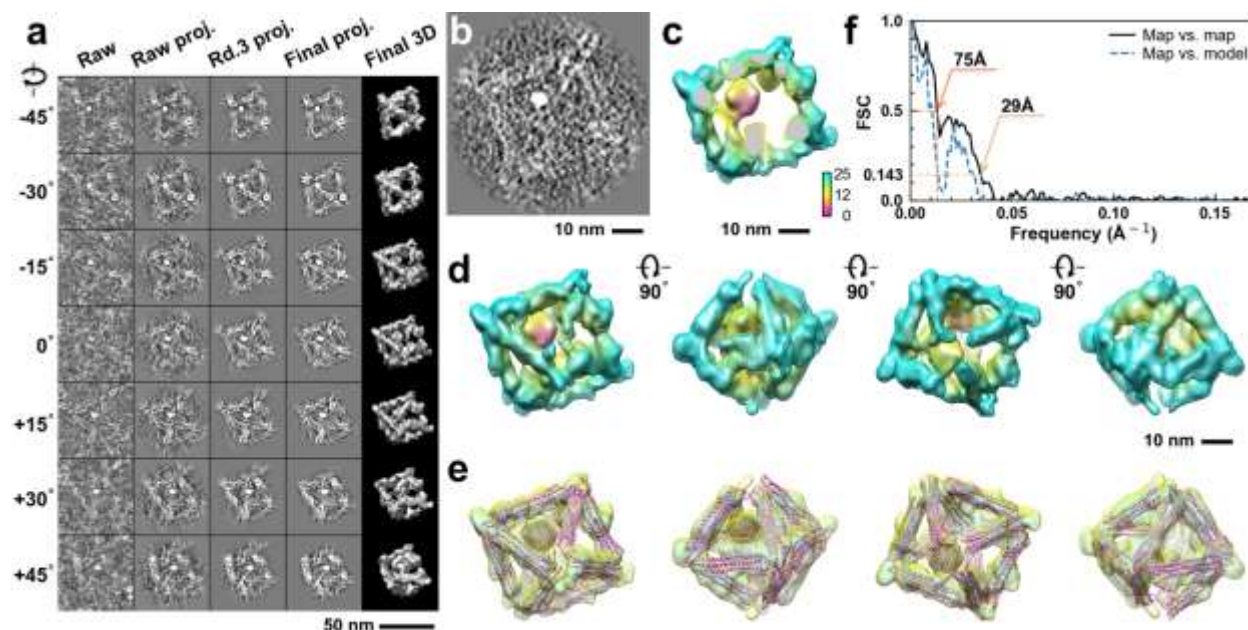

**Supplementary Fig. 45: IPET 3D reconstruction and model fitting of an individual unit-cell particle (Index: 037) within a 2D lattice with 100% ferritin loading.** **a**, Seven representative tilt images of a single unit-cell particle are shown in the first column (from left). The tilt images are aligned to a common center using IPET through iterative refinement. The projections of the raw, intermediate, and final 3D reconstruction at the corresponding angles are displayed in the subsequent four columns. **b**, A central cross-section (~23 nm thick) of the final reconstruction before masking is applied. **c**, 3D views of the central cross-section. **d**, Final 3D density map of this particle, viewed from four perpendicular directions. **e**, Final 3D reconstruction superimposed with the fitted model, viewed from four perpendicular directions. **f**, FSC analyses of the final map resolution using two methods: map-map FSC, where each map is reconstructed from one half of the images (even vs. odd tilt angle indices), and map-model FSC, where the model map is generated from the fitted model. Resolution assessments are provided based on tilt-based map-map and map-model FSC analyses at thresholds of FSC=0.5 and 0.143, respectively.



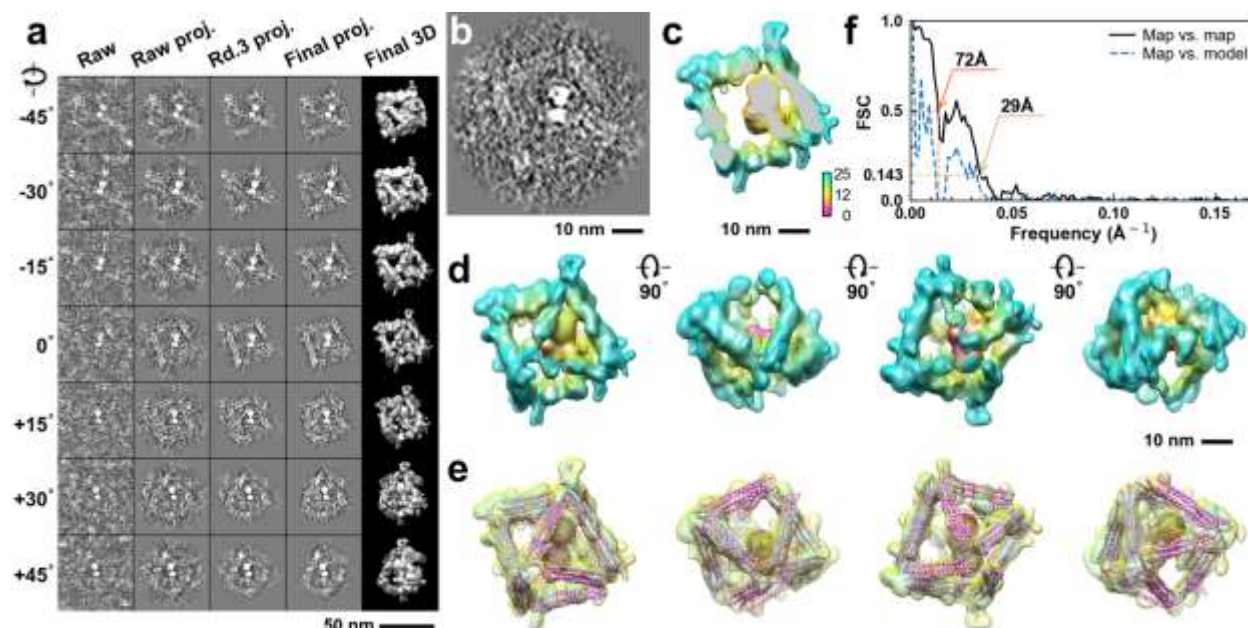

**Supplementary Fig. 46: IPET 3D reconstruction and model fitting of an individual unit-cell particle (Index: 038) within a 2D lattice with 100% ferritin loading.** **a**, Seven representative tilt images of a single unit-cell particle are shown in the first column (from left). The tilt images are aligned to a common center using IPET through iterative refinement. The projections of the raw, intermediate, and final 3D reconstruction at the corresponding angles are displayed in the subsequent four columns. **b**, A central cross-section (~23 nm thick) of the final reconstruction before masking is applied. **c**, 3D views of the central cross-section. **d**, Final 3D density map of this particle, viewed from four perpendicular directions. **e**, Final 3D reconstruction superimposed with the fitted model, viewed from four perpendicular directions. **f**, FSC analyses of the final map resolution using two methods: map-map FSC, where each map is reconstructed from one half of the images (even vs. odd tilt angle indices), and map-model FSC, where the model map is generated from the fitted model. Resolution assessments are provided based on tilt-based map-map and map-model FSC analyses at thresholds of FSC=0.5 and 0.143, respectively.

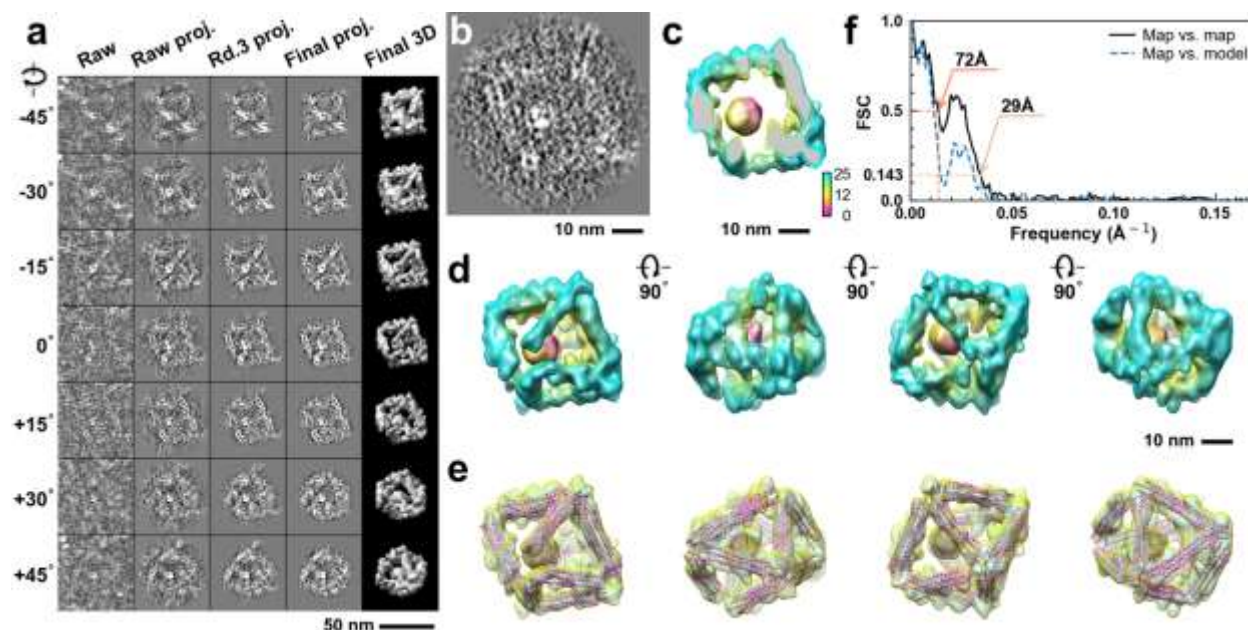

**Supplementary Fig. 47: IPET 3D reconstruction and model fitting of an individual unit-cell particle (Index: 039) within a 2D lattice with 100% ferritin loading.** **a**, Seven representative tilt images of a single unit-cell particle are shown in the first column (from left). The tilt images are aligned to a common center using IPET through iterative refinement. The projections of the raw, intermediate, and final 3D reconstruction at the corresponding angles are displayed in the subsequent four columns. **b**, A central cross-section (~23 nm thick) of the final reconstruction before masking is applied. **c**, 3D views of the central cross-section. **d**, Final 3D density map of this particle, viewed from four perpendicular directions. **e**, Final 3D reconstruction superimposed with the fitted model, viewed from four perpendicular directions. **f**, FSC analyses of the final map resolution using two methods: map-map FSC, where each map is reconstructed from one half of the images (even vs. odd tilt angle indices), and map-model FSC, where the model map is generated from the fitted model. Resolution assessments are provided based on tilt-based map-map and map-model FSC analyses at thresholds of FSC=0.5 and 0.143, respectively.

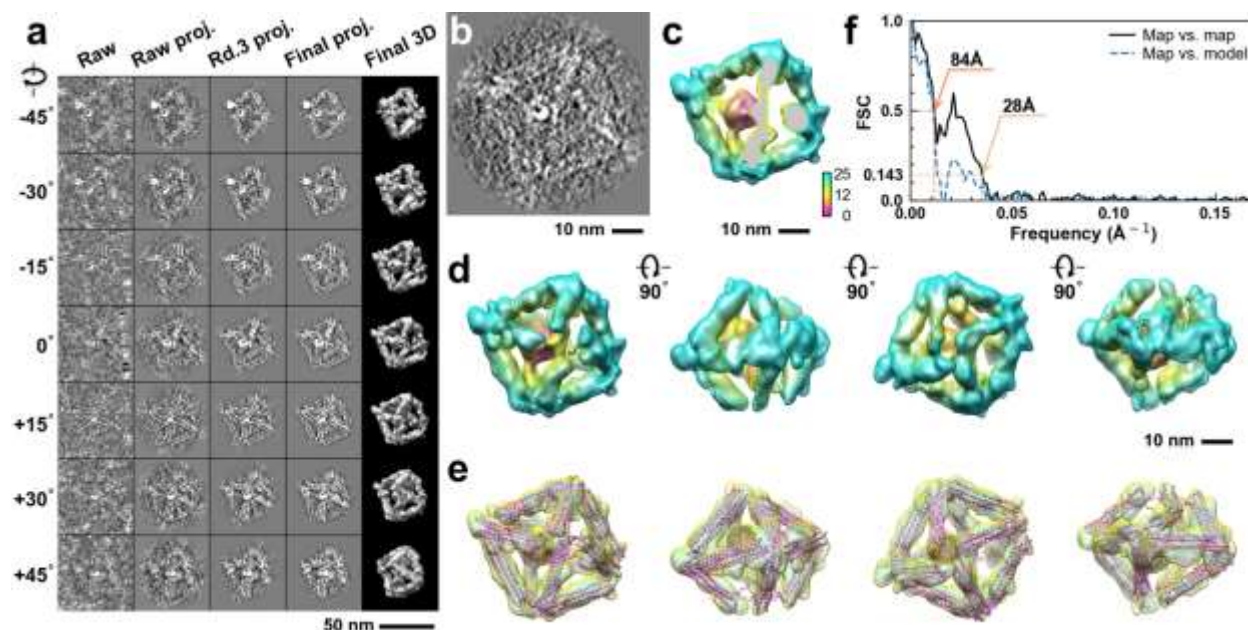

**Supplementary Fig. 48: IPET 3D reconstruction and model fitting of an individual unit-cell particle (Index: 040) within a 2D lattice with 100% ferritin loading.** **a**, Seven representative tilt images of a single unit-cell particle are shown in the first column (from left). The tilt images are aligned to a common center using IPET through iterative refinement. The projections of the raw, intermediate, and final 3D reconstruction at the corresponding angles are displayed in the subsequent four columns. **b**, A central cross-section (~23 nm thick) of the final reconstruction before masking is applied. **c**, 3D views of the central cross-section. **d**, Final 3D density map of this particle, viewed from four perpendicular directions. **e**, Final 3D reconstruction superimposed with the fitted model, viewed from four perpendicular directions. **f**, FSC analyses of the final map resolution using two methods: map-map FSC, where each map is reconstructed from one half of the images (even vs. odd tilt angle indices), and map-model FSC, where the model map is generated from the fitted model. Resolution assessments are provided based on tilt-based map-map and map-model FSC analyses at thresholds of FSC=0.5 and 0.143, respectively.

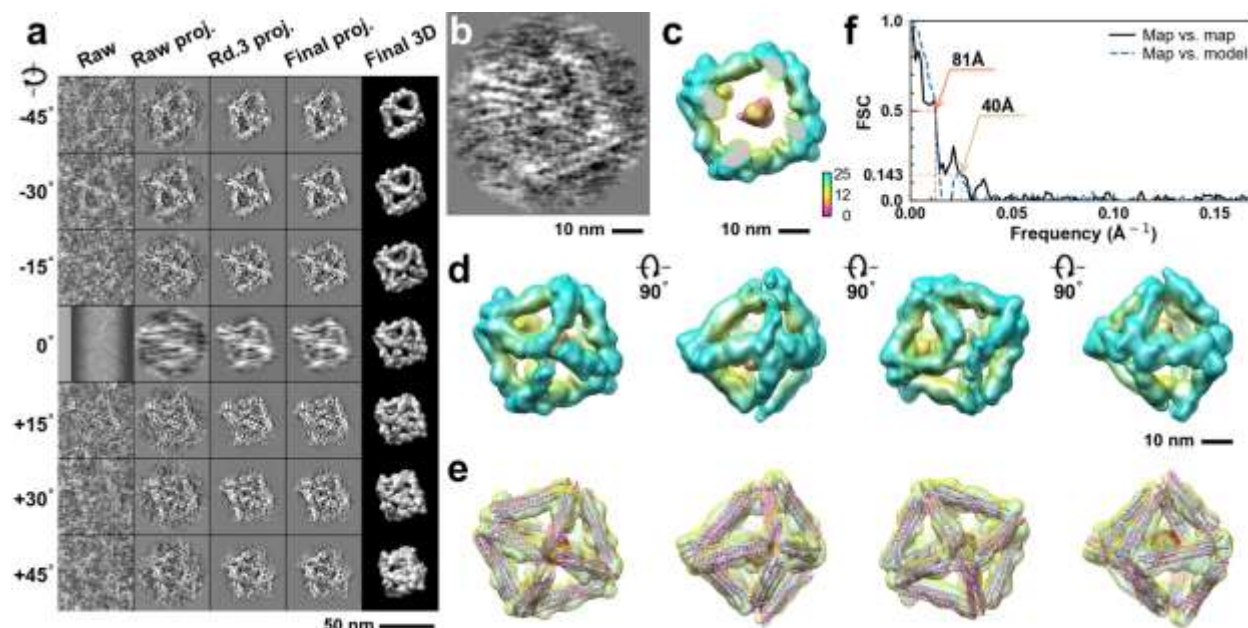

**Supplementary Fig. 49: IPET 3D reconstruction and model fitting of an individual unit-cell particle (Index: 041) within a 2D lattice with 100% ferritin loading.** **a**, Seven representative tilt images of a single unit-cell particle are shown in the first column (from left). The tilt images are aligned to a common center using IPET through iterative refinement. The projections of the raw, intermediate, and final 3D reconstruction at the corresponding angles are displayed in the subsequent four columns. **b**, A central cross-section (~23 nm thick) of the final reconstruction before masking is applied. **c**, 3D views of the central cross-section. **d**, Final 3D density map of this particle, viewed from four perpendicular directions. **e**, Final 3D reconstruction superimposed with the fitted model, viewed from four perpendicular directions. **f**, FSC analyses of the final map resolution using two methods: map-map FSC, where each map is reconstructed from one half of the images (even vs. odd tilt angle indices), and map-model FSC, where the model map is generated from the fitted model. Resolution assessments are provided based on tilt-based map-map and map-model FSC analyses at thresholds of FSC=0.5 and 0.143, respectively.



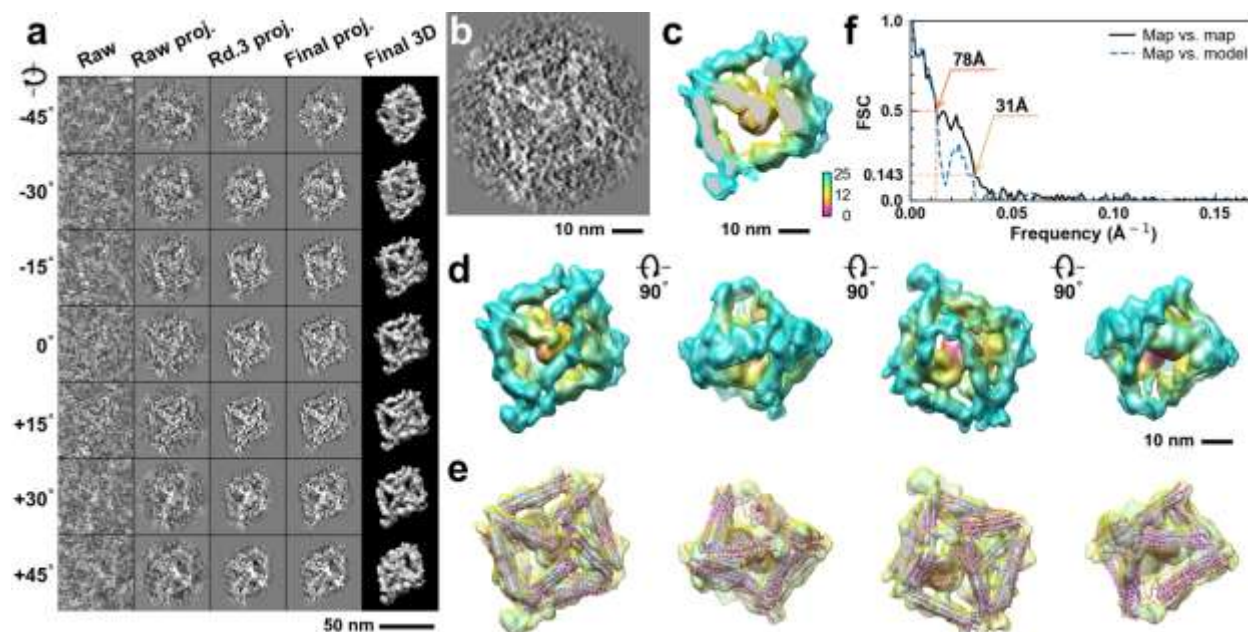

**Supplementary Fig. 50: IPET 3D reconstruction and model fitting of an individual unit-cell particle (Index: 042) within a 2D lattice with 100% ferritin loading.** **a**, Seven representative tilt images of a single unit-cell particle are shown in the first column (from left). The tilt images are aligned to a common center using IPET through iterative refinement. The projections of the raw, intermediate, and final 3D reconstruction at the corresponding angles are displayed in the subsequent four columns. **b**, A central cross-section (~23 nm thick) of the final reconstruction before masking is applied. **c**, 3D views of the central cross-section. **d**, Final 3D density map of this particle, viewed from four perpendicular directions. **e**, Final 3D reconstruction superimposed with the fitted model, viewed from four perpendicular directions. **f**, FSC analyses of the final map resolution using two methods: map-map FSC, where each map is reconstructed from one half of the images (even vs. odd tilt angle indices), and map-model FSC, where the model map is generated from the fitted model. Resolution assessments are provided based on tilt-based map-map and map-model FSC analyses at thresholds of FSC=0.5 and 0.143, respectively.

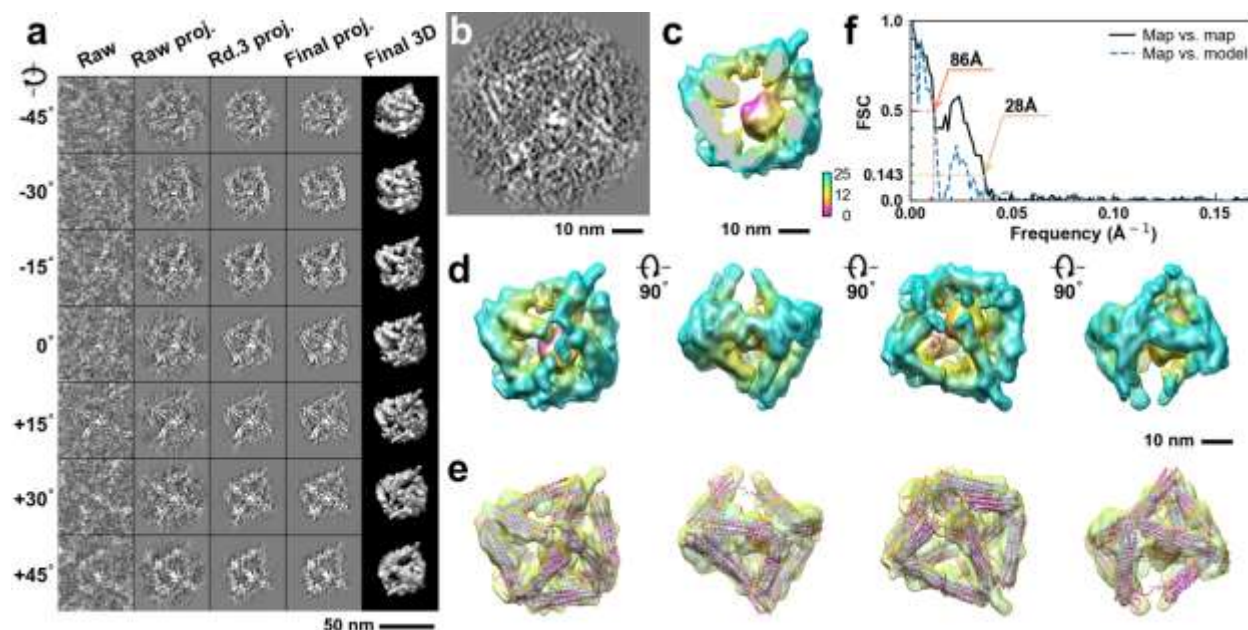

**Supplementary Fig. 51: IPET 3D reconstruction and model fitting of an individual unit-cell particle (Index: 043) within a 2D lattice with 100% ferritin loading.** **a**, Seven representative tilt images of a single unit-cell particle are shown in the first column (from left). The tilt images are aligned to a common center using IPET through iterative refinement. The projections of the raw, intermediate, and final 3D reconstruction at the corresponding angles are displayed in the subsequent four columns. **b**, A central cross-section (~23 nm thick) of the final reconstruction before masking is applied. **c**, 3D views of the central cross-section. **d**, Final 3D density map of this particle, viewed from four perpendicular directions. **e**, Final 3D reconstruction superimposed with the fitted model, viewed from four perpendicular directions. **f**, FSC analyses of the final map resolution using two methods: map-map FSC, where each map is reconstructed from one half of the images (even vs. odd tilt angle indices), and map-model FSC, where the model map is generated from the fitted model. Resolution assessments are provided based on tilt-based map-map and map-model FSC analyses at thresholds of FSC=0.5 and 0.143, respectively.

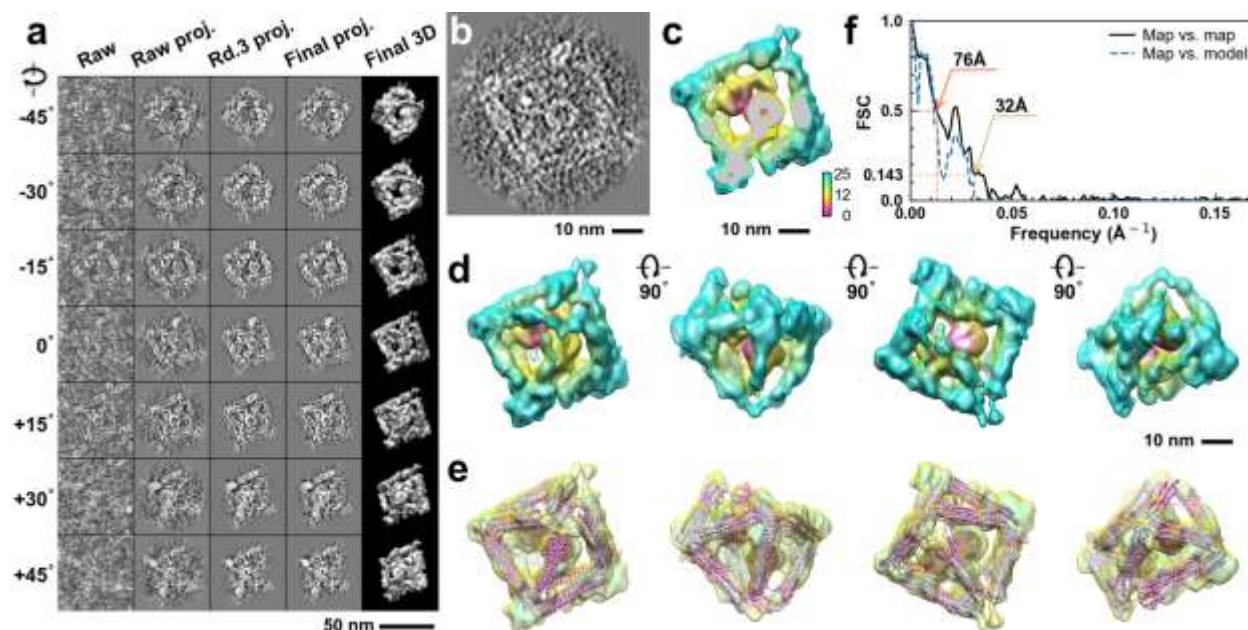

**Supplementary Fig. 52: IPET 3D reconstruction and model fitting of an individual unit-cell particle (Index: 044) within a 2D lattice with 100% ferritin loading.** **a**, Seven representative tilt images of a single unit-cell particle are shown in the first column (from left). The tilt images are aligned to a common center using IPET through iterative refinement. The projections of the raw, intermediate, and final 3D reconstruction at the corresponding angles are displayed in the subsequent four columns. **b**, A central cross-section (~23 nm thick) of the final reconstruction before masking is applied. **c**, 3D views of the central cross-section. **d**, Final 3D density map of this particle, viewed from four perpendicular directions. **e**, Final 3D reconstruction superimposed with the fitted model, viewed from four perpendicular directions. **f**, FSC analyses of the final map resolution using two methods: map-map FSC, where each map is reconstructed from one half of the images (even vs. odd tilt angle indices), and map-model FSC, where the model map is generated from the fitted model. Resolution assessments are provided based on tilt-based map-map and map-model FSC analyses at thresholds of FSC=0.5 and 0.143, respectively.

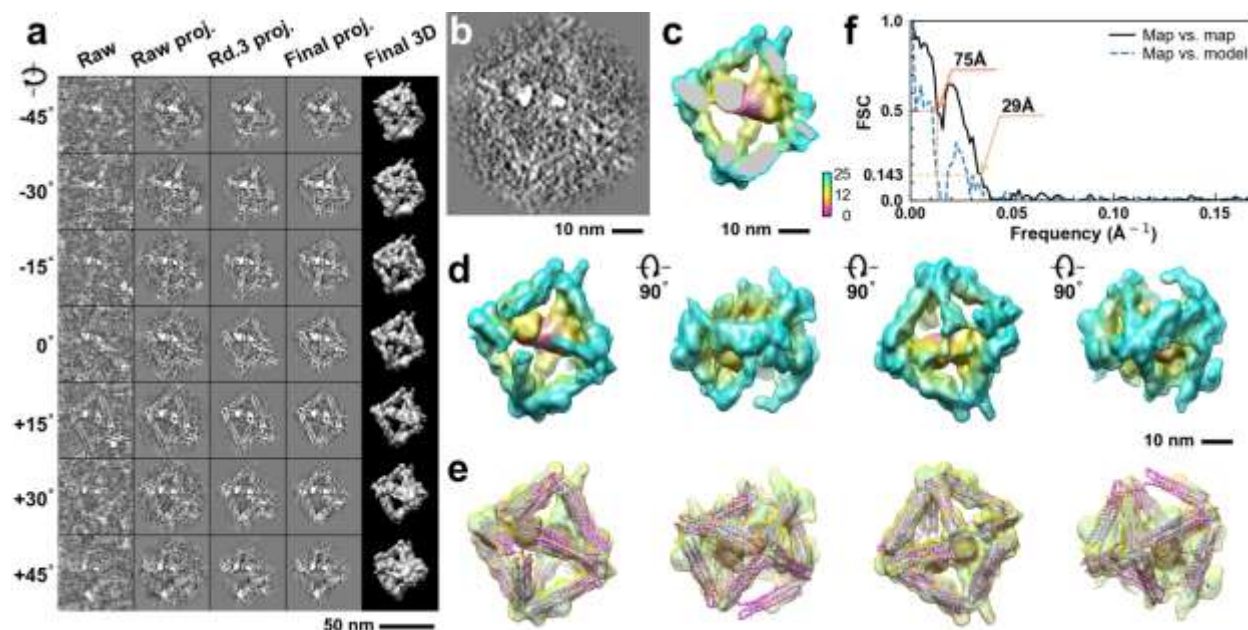

**Supplementary Fig. 53: IPET 3D reconstruction and model fitting of an individual unit-cell particle (Index: 045) within a 2D lattice with 100% ferritin loading.** **a**, Seven representative tilt images of a single unit-cell particle are shown in the first column (from left). The tilt images are aligned to a common center using IPET through iterative refinement. The projections of the raw, intermediate, and final 3D reconstruction at the corresponding angles are displayed in the subsequent four columns. **b**, A central cross-section (~23 nm thick) of the final reconstruction before masking is applied. **c**, 3D views of the central cross-section. **d**, Final 3D density map of this particle, viewed from four perpendicular directions. **e**, Final 3D reconstruction superimposed with the fitted model, viewed from four perpendicular directions. **f**, FSC analyses of the final map resolution using two methods: map-map FSC, where each map is reconstructed from one half of the images (even vs. odd tilt angle indices), and map-model FSC, where the model map is generated from the fitted model. Resolution assessments are provided based on tilt-based map-map and map-model FSC analyses at thresholds of FSC=0.5 and 0.143, respectively.



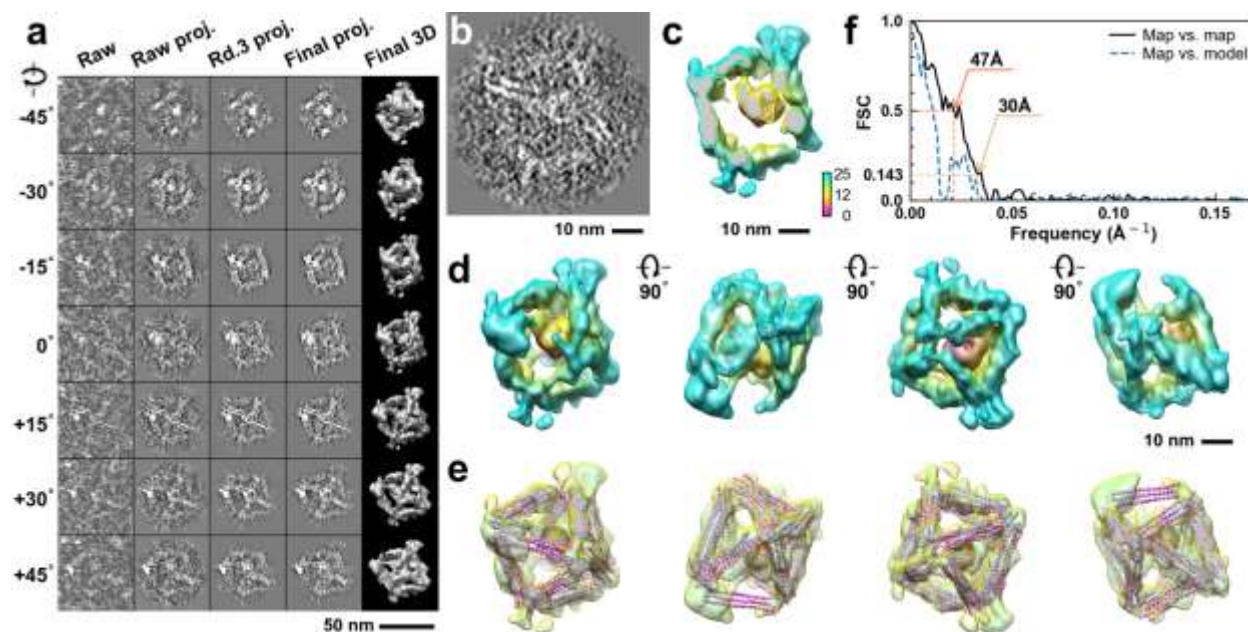

**Supplementary Fig. 54: IPET 3D reconstruction and model fitting of an individual unit-cell particle (Index: 046) within a 2D lattice with 100% ferritin loading.** **a**, Seven representative tilt images of a single unit-cell particle are shown in the first column (from left). The tilt images are aligned to a common center using IPET through iterative refinement. The projections of the raw, intermediate, and final 3D reconstruction at the corresponding angles are displayed in the subsequent four columns. **b**, A central cross-section (~23 nm thick) of the final reconstruction before masking is applied. **c**, 3D views of the central cross-section. **d**, Final 3D density map of this particle, viewed from four perpendicular directions. **e**, Final 3D reconstruction superimposed with the fitted model, viewed from four perpendicular directions. **f**, FSC analyses of the final map resolution using two methods: map-map FSC, where each map is reconstructed from one half of the images (even vs. odd tilt angle indices), and map-model FSC, where the model map is generated from the fitted model. Resolution assessments are provided based on tilt-based map-map and map-model FSC analyses at thresholds of FSC=0.5 and 0.143, respectively.

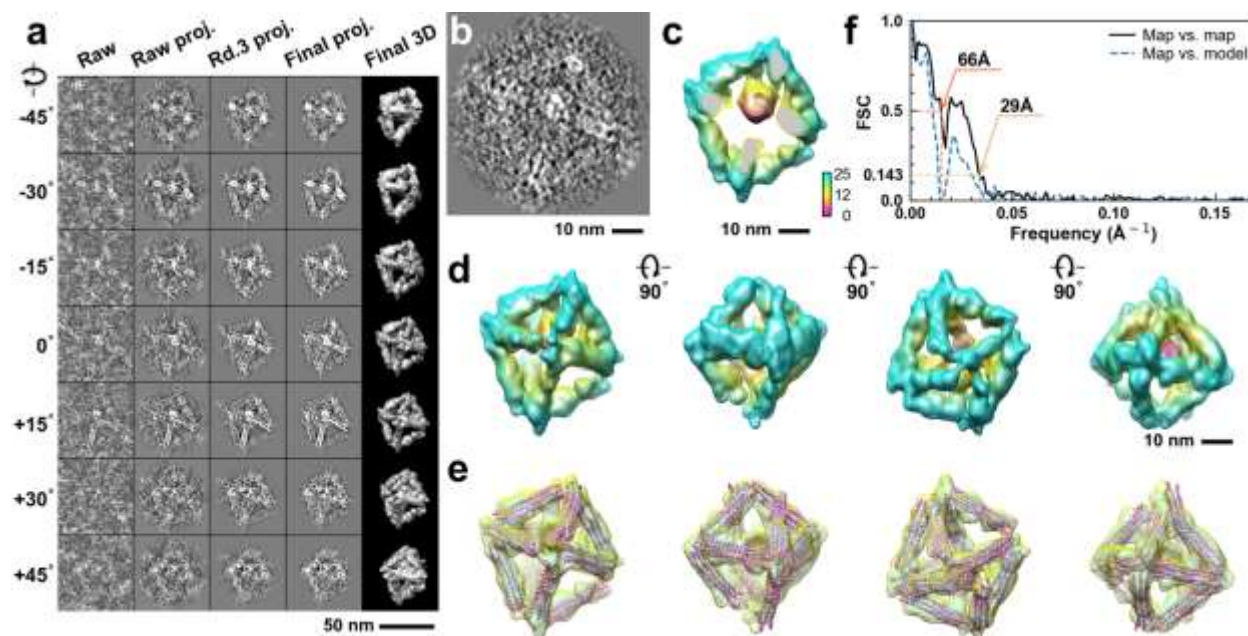

**Supplementary Fig. 55: IPET 3D reconstruction and model fitting of an individual unit-cell particle (Index: 047) within a 2D lattice with 100% ferritin loading.** **a**, Seven representative tilt images of a single unit-cell particle are shown in the first column (from left). The tilt images are aligned to a common center using IPET through iterative refinement. The projections of the raw, intermediate, and final 3D reconstruction at the corresponding angles are displayed in the subsequent four columns. **b**, A central cross-section (~23 nm thick) of the final reconstruction before masking is applied. **c**, 3D views of the central cross-section. **d**, Final 3D density map of this particle, viewed from four perpendicular directions. **e**, Final 3D reconstruction superimposed with the fitted model, viewed from four perpendicular directions. **f**, FSC analyses of the final map resolution using two methods: map-map FSC, where each map is reconstructed from one half of the images (even vs. odd tilt angle indices), and map-model FSC, where the model map is generated from the fitted model. Resolution assessments are provided based on tilt-based map-map and map-model FSC analyses at thresholds of FSC=0.5 and 0.143, respectively.

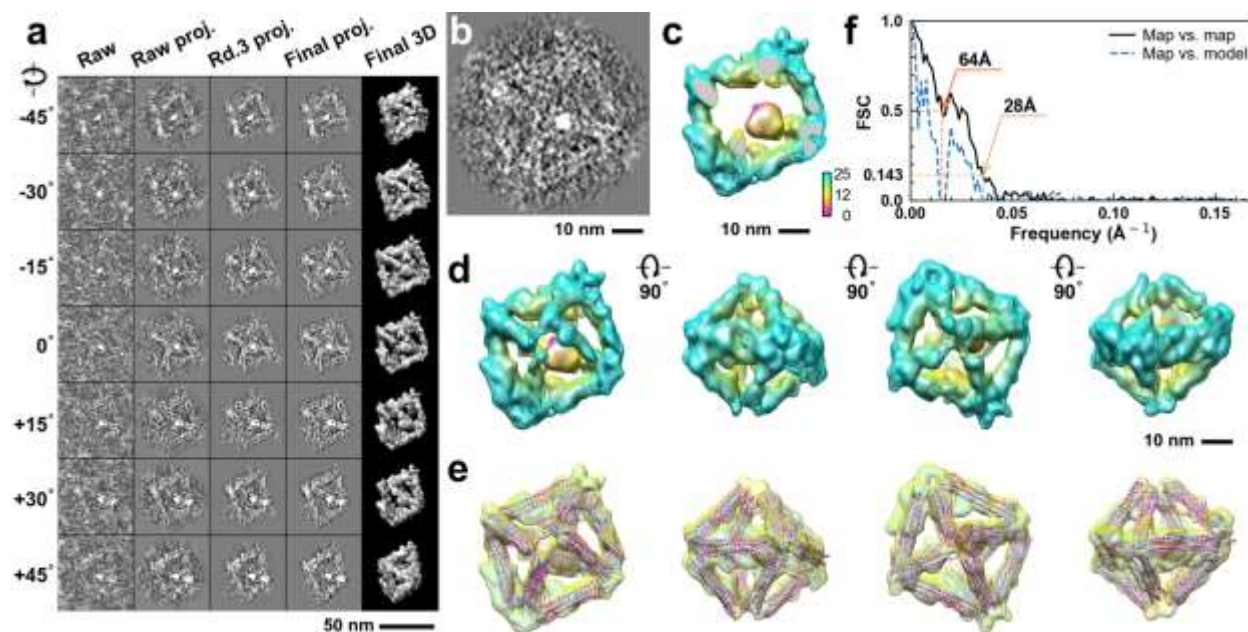

**Supplementary Fig. 56: IPET 3D reconstruction and model fitting of an individual unit-cell particle (Index: 048) within a 2D lattice with 100% ferritin loading.** **a**, Seven representative tilt images of a single unit-cell particle are shown in the first column (from left). The tilt images are aligned to a common center using IPET through iterative refinement. The projections of the raw, intermediate, and final 3D reconstruction at the corresponding angles are displayed in the subsequent four columns. **b**, A central cross-section (~23 nm thick) of the final reconstruction before masking is applied. **c**, 3D views of the central cross-section. **d**, Final 3D density map of this particle, viewed from four perpendicular directions. **e**, Final 3D reconstruction superimposed with the fitted model, viewed from four perpendicular directions. **f**, FSC analyses of the final map resolution using two methods: map-map FSC, where each map is reconstructed from one half of the images (even vs. odd tilt angle indices), and map-model FSC, where the model map is generated from the fitted model. Resolution assessments are provided based on tilt-based map-map and map-model FSC analyses at thresholds of FSC=0.5 and 0.143, respectively.

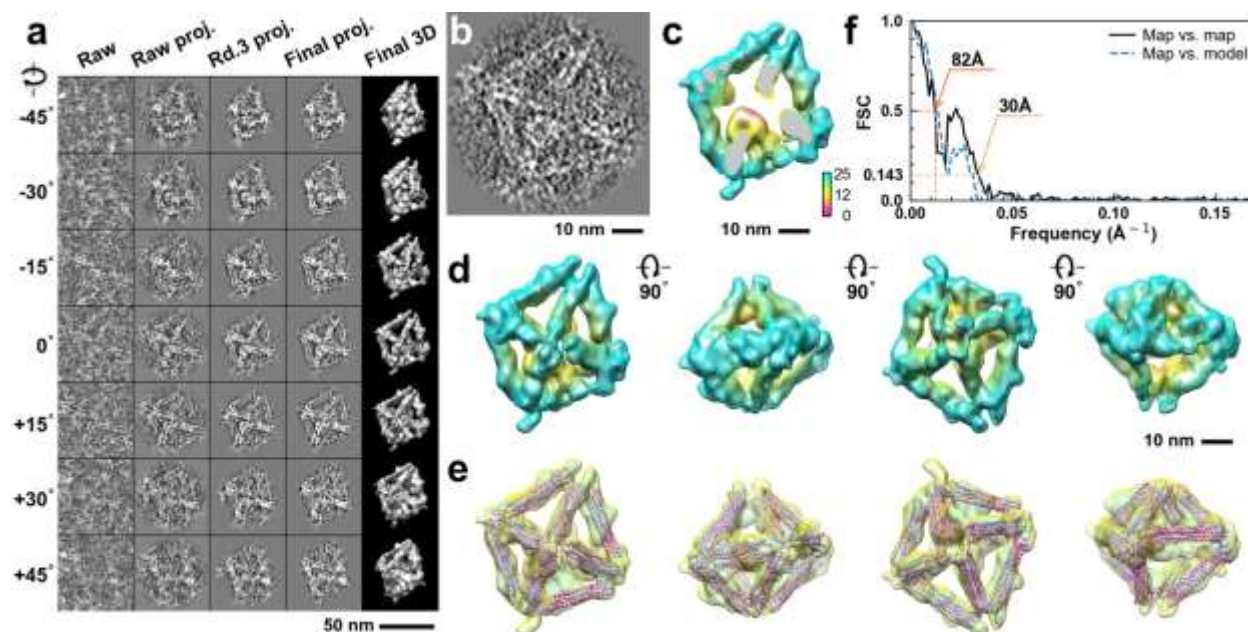

**Supplementary Fig. 57: IPET 3D reconstruction and model fitting of an individual unit-cell particle (Index: 049) within a 2D lattice with 100% ferritin loading.** **a**, Seven representative tilt images of a single unit-cell particle are shown in the first column (from left). The tilt images are aligned to a common center using IPET through iterative refinement. The projections of the raw, intermediate, and final 3D reconstruction at the corresponding angles are displayed in the subsequent four columns. **b**, A central cross-section (~23 nm thick) of the final reconstruction before masking is applied. **c**, 3D views of the central cross-section. **d**, Final 3D density map of this particle, viewed from four perpendicular directions. **e**, Final 3D reconstruction superimposed with the fitted model, viewed from four perpendicular directions. **f**, FSC analyses of the final map resolution using two methods: map-map FSC, where each map is reconstructed from one half of the images (even vs. odd tilt angle indices), and map-model FSC, where the model map is generated from the fitted model. Resolution assessments are provided based on tilt-based map-map and map-model FSC analyses at thresholds of FSC=0.5 and 0.143, respectively.



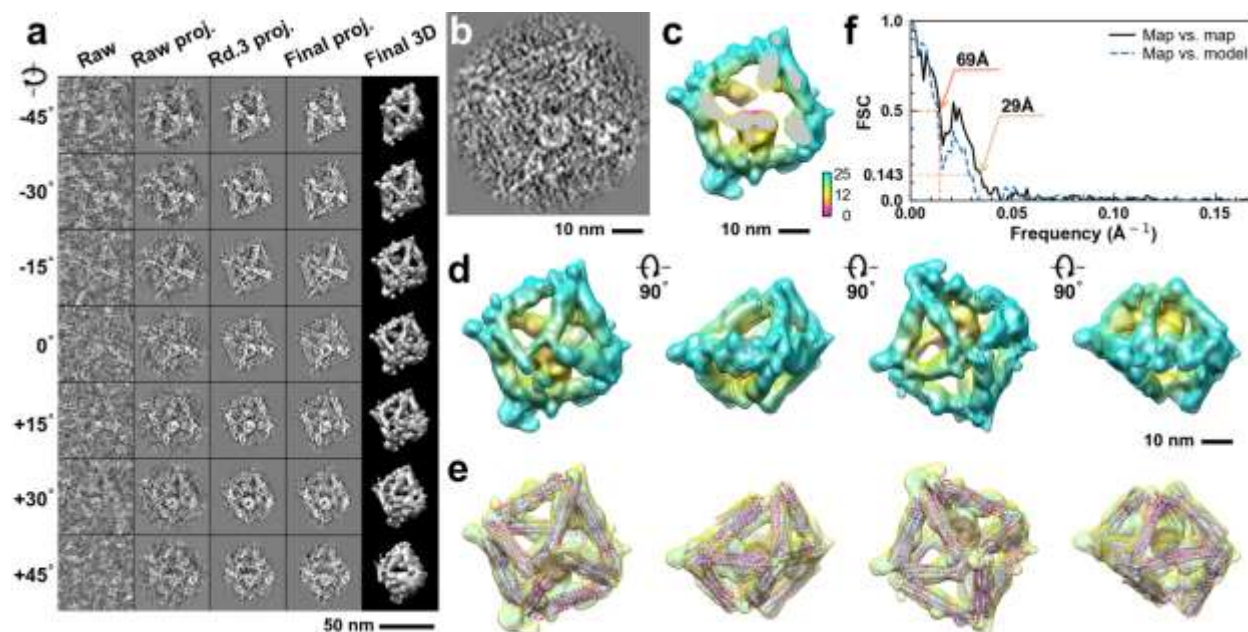

**Supplementary Fig. 58: IPET 3D reconstruction and model fitting of an individual unit-cell particle (Index: 050) within a 2D lattice with 100% ferritin loading.** **a**, Seven representative tilt images of a single unit-cell particle are shown in the first column (from left). The tilt images are aligned to a common center using IPET through iterative refinement. The projections of the raw, intermediate, and final 3D reconstruction at the corresponding angles are displayed in the subsequent four columns. **b**, A central cross-section (~23 nm thick) of the final reconstruction before masking is applied. **c**, 3D views of the central cross-section. **d**, Final 3D density map of this particle, viewed from four perpendicular directions. **e**, Final 3D reconstruction superimposed with the fitted model, viewed from four perpendicular directions. **f**, FSC analyses of the final map resolution using two methods: map-map FSC, where each map is reconstructed from one half of the images (even vs. odd tilt angle indices), and map-model FSC, where the model map is generated from the fitted model. Resolution assessments are provided based on tilt-based map-map and map-model FSC analyses at thresholds of FSC=0.5 and 0.143, respectively.

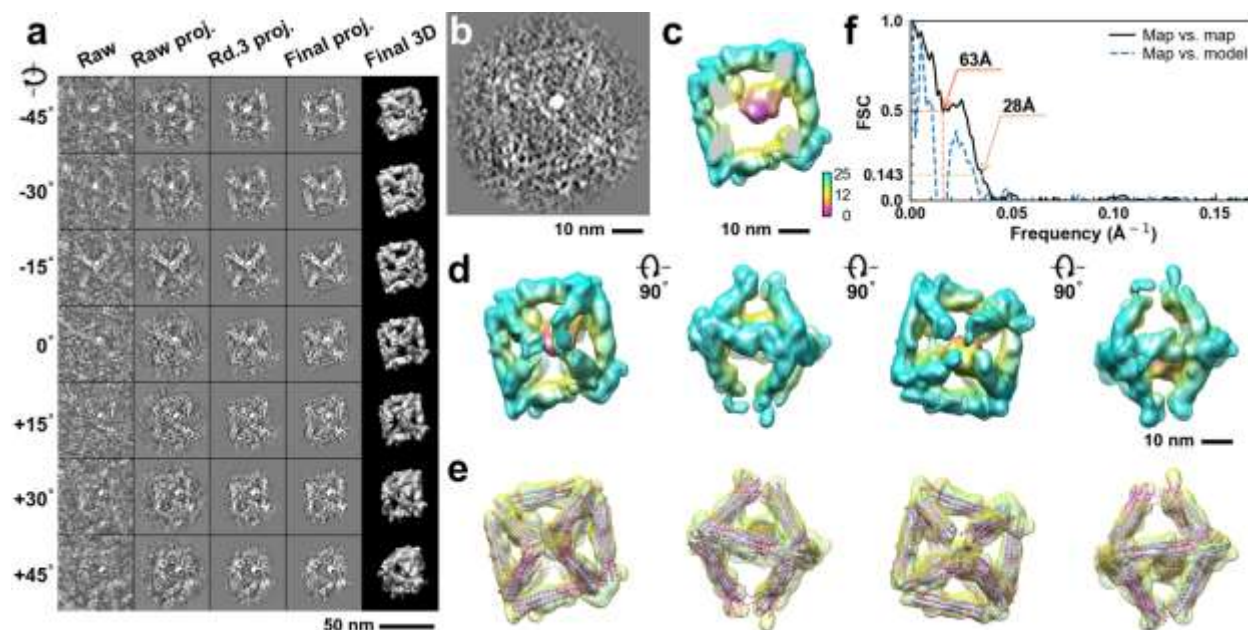

**Supplementary Fig. 59: IPET 3D reconstruction and model fitting of an individual unit-cell particle (Index: 051) within a 2D lattice with 100% ferritin loading.** **a**, Seven representative tilt images of a single unit-cell particle are shown in the first column (from left). The tilt images are aligned to a common center using IPET through iterative refinement. The projections of the raw, intermediate, and final 3D reconstruction at the corresponding angles are displayed in the subsequent four columns. **b**, A central cross-section (~23 nm thick) of the final reconstruction before masking is applied. **c**, 3D views of the central cross-section. **d**, Final 3D density map of this particle, viewed from four perpendicular directions. **e**, Final 3D reconstruction superimposed with the fitted model, viewed from four perpendicular directions. **f**, FSC analyses of the final map resolution using two methods: map-map FSC, where each map is reconstructed from one half of the images (even vs. odd tilt angle indices), and map-model FSC, where the model map is generated from the fitted model. Resolution assessments are provided based on tilt-based map-map and map-model FSC analyses at thresholds of FSC=0.5 and 0.143, respectively.

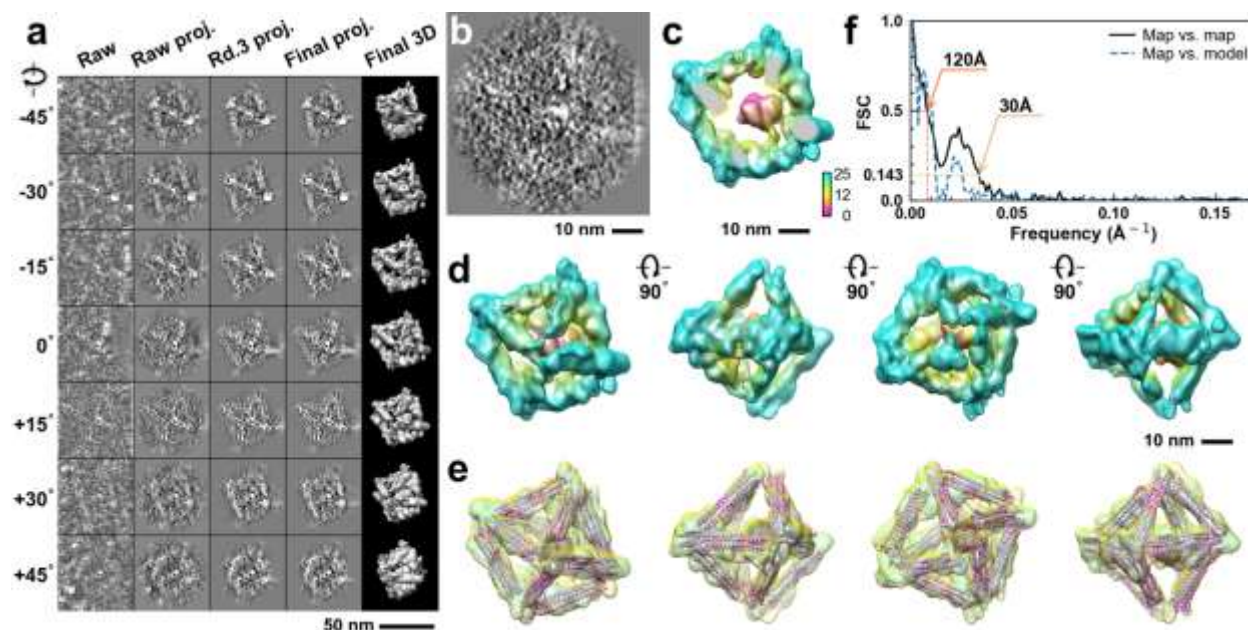

**Supplementary Fig. 60: IPET 3D reconstruction and model fitting of an individual unit-cell particle (Index: 052) within a 2D lattice with 100% ferritin loading.** **a**, Seven representative tilt images of a single unit-cell particle are shown in the first column (from left). The tilt images are aligned to a common center using IPET through iterative refinement. The projections of the raw, intermediate, and final 3D reconstruction at the corresponding angles are displayed in the subsequent four columns. **b**, A central cross-section (~23 nm thick) of the final reconstruction before masking is applied. **c**, 3D views of the central cross-section. **d**, Final 3D density map of this particle, viewed from four perpendicular directions. **e**, Final 3D reconstruction superimposed with the fitted model, viewed from four perpendicular directions. **f**, FSC analyses of the final map resolution using two methods: map-map FSC, where each map is reconstructed from one half of the images (even vs. odd tilt angle indices), and map-model FSC, where the model map is generated from the fitted model. Resolution assessments are provided based on tilt-based map-map and map-model FSC analyses at thresholds of FSC=0.5 and 0.143, respectively.

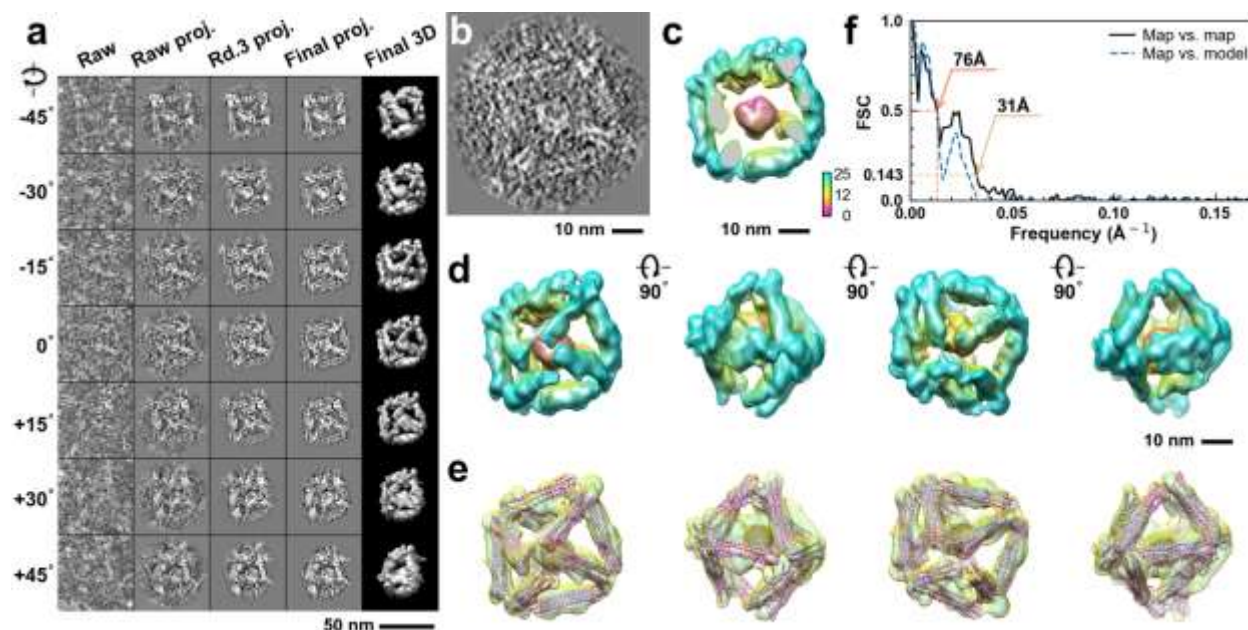

**Supplementary Fig. 61: IPET 3D reconstruction and model fitting of an individual unit-cell particle (Index: 053) within a 2D lattice with 100% ferritin loading.** **a**, Seven representative tilt images of a single unit-cell particle are shown in the first column (from left). The tilt images are aligned to a common center using IPET through iterative refinement. The projections of the raw, intermediate, and final 3D reconstruction at the corresponding angles are displayed in the subsequent four columns. **b**, A central cross-section (~23 nm thick) of the final reconstruction before masking is applied. **c**, 3D views of the central cross-section. **d**, Final 3D density map of this particle, viewed from four perpendicular directions. **e**, Final 3D reconstruction superimposed with the fitted model, viewed from four perpendicular directions. **f**, FSC analyses of the final map resolution using two methods: map-map FSC, where each map is reconstructed from one half of the images (even vs. odd tilt angle indices), and map-model FSC, where the model map is generated from the fitted model. Resolution assessments are provided based on tilt-based map-map and map-model FSC analyses at thresholds of FSC=0.5 and 0.143, respectively.



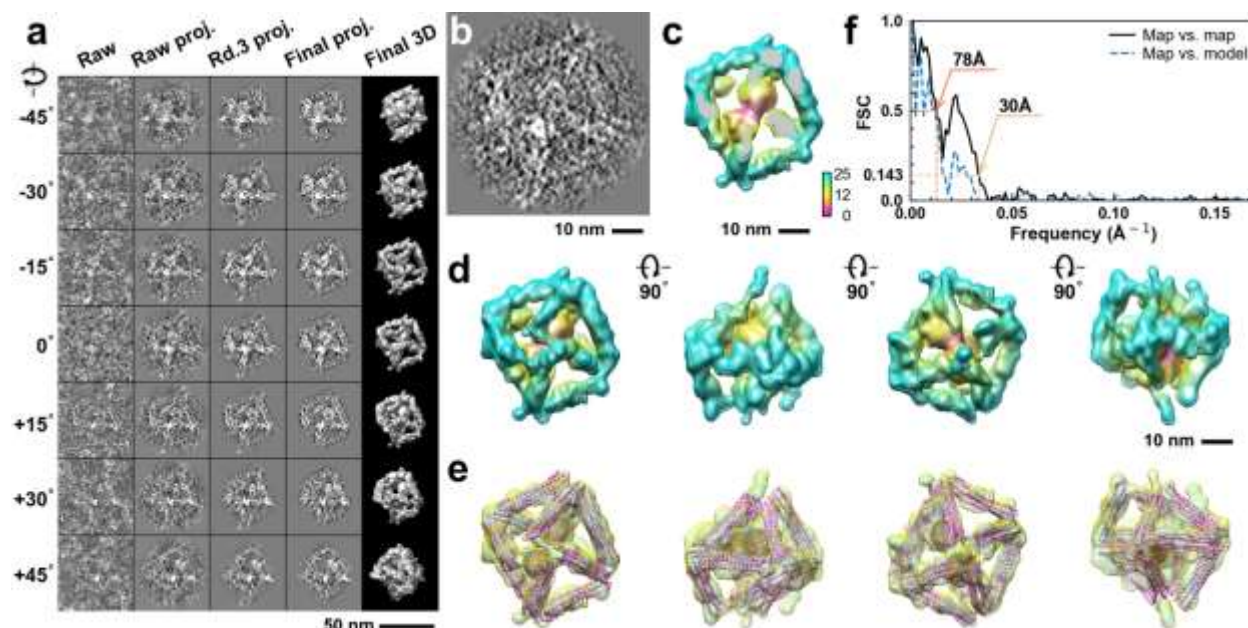

**Supplementary Fig. 62: IPET 3D reconstruction and model fitting of an individual unit-cell particle (Index: 054) within a 2D lattice with 100% ferritin loading.** **a**, Seven representative tilt images of a single unit-cell particle are shown in the first column (from left). The tilt images are aligned to a common center using IPET through iterative refinement. The projections of the raw, intermediate, and final 3D reconstruction at the corresponding angles are displayed in the subsequent four columns. **b**, A central cross-section (~23 nm thick) of the final reconstruction before masking is applied. **c**, 3D views of the central cross-section. **d**, Final 3D density map of this particle, viewed from four perpendicular directions. **e**, Final 3D reconstruction superimposed with the fitted model, viewed from four perpendicular directions. **f**, FSC analyses of the final map resolution using two methods: map-map FSC, where each map is reconstructed from one half of the images (even vs. odd tilt angle indices), and map-model FSC, where the model map is generated from the fitted model. Resolution assessments are provided based on tilt-based map-map and map-model FSC analyses at thresholds of FSC=0.5 and 0.143, respectively.

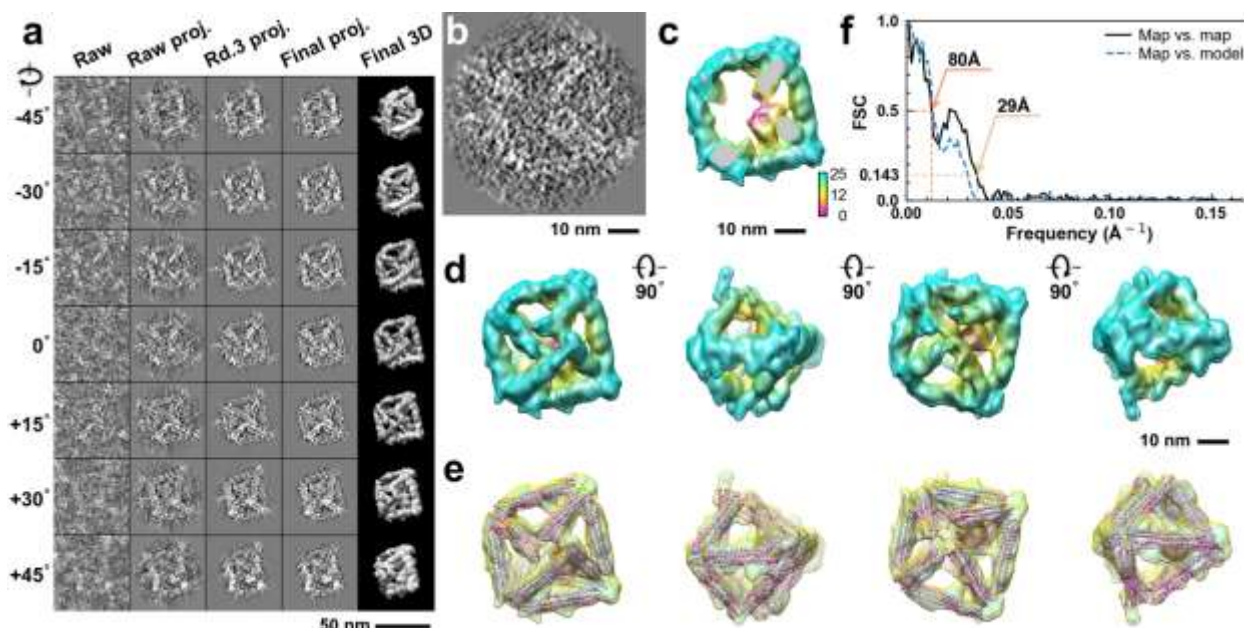

**Supplementary Fig. 63: IPET 3D reconstruction and model fitting of an individual unit-cell particle (Index: 055) within a 2D lattice with 100% ferritin loading.** **a**, Seven representative tilt images of a single unit-cell particle are shown in the first column (from left). The tilt images are aligned to a common center using IPET through iterative refinement. The projections of the raw, intermediate, and final 3D reconstruction at the corresponding angles are displayed in the subsequent four columns. **b**, A central cross-section (~23 nm thick) of the final reconstruction before masking is applied. **c**, 3D views of the central cross-section. **d**, Final 3D density map of this particle, viewed from four perpendicular directions. **e**, Final 3D reconstruction superimposed with the fitted model, viewed from four perpendicular directions. **f**, FSC analyses of the final map resolution using two methods: map-map FSC, where each map is reconstructed from one half of the images (even vs. odd tilt angle indices), and map-model FSC, where the model map is generated from the fitted model. Resolution assessments are provided based on tilt-based map-map and map-model FSC analyses at thresholds of FSC=0.5 and 0.143, respectively.

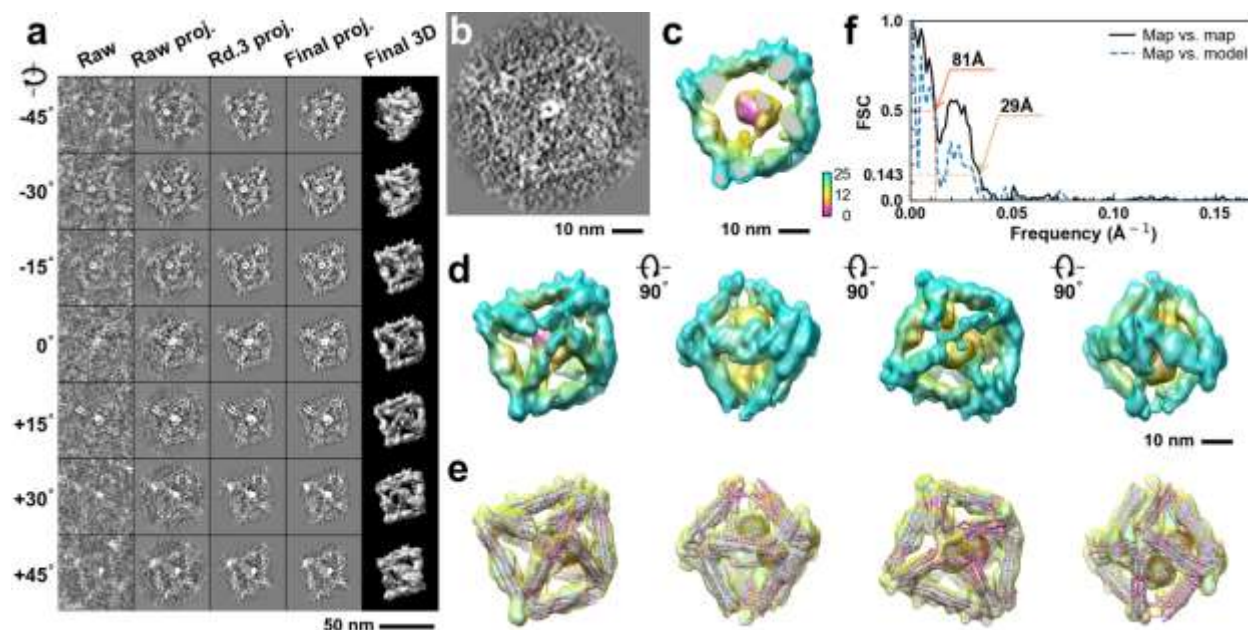

**Supplementary Fig. 64: IPET 3D reconstruction and model fitting of an individual unit-cell particle (Index: 056) within a 2D lattice with 100% ferritin loading.** **a**, Seven representative tilt images of a single unit-cell particle are shown in the first column (from left). The tilt images are aligned to a common center using IPET through iterative refinement. The projections of the raw, intermediate, and final 3D reconstruction at the corresponding angles are displayed in the subsequent four columns. **b**, A central cross-section (~23 nm thick) of the final reconstruction before masking is applied. **c**, 3D views of the central cross-section. **d**, Final 3D density map of this particle, viewed from four perpendicular directions. **e**, Final 3D reconstruction superimposed with the fitted model, viewed from four perpendicular directions. **f**, FSC analyses of the final map resolution using two methods: map-map FSC, where each map is reconstructed from one half of the images (even vs. odd tilt angle indices), and map-model FSC, where the model map is generated from the fitted model. Resolution assessments are provided based on tilt-based map-map and map-model FSC analyses at thresholds of FSC=0.5 and 0.143, respectively.

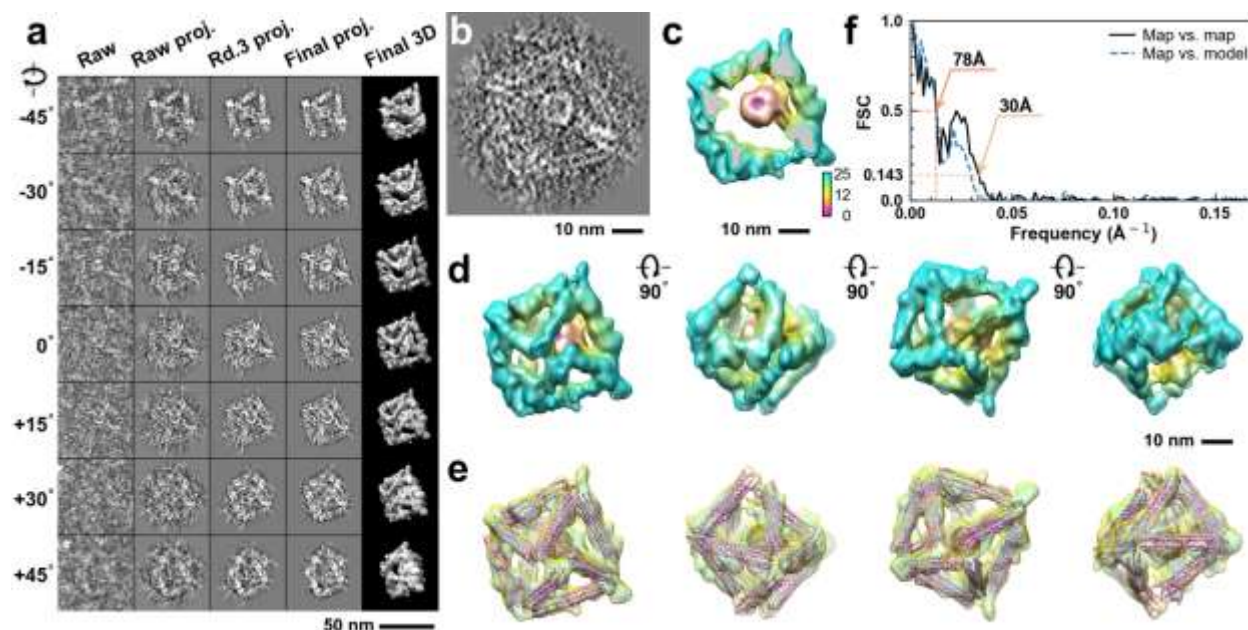

**Supplementary Fig. 65: IPET 3D reconstruction and model fitting of an individual unit-cell particle (Index: 057) within a 2D lattice with 100% ferritin loading.** **a**, Seven representative tilt images of a single unit-cell particle are shown in the first column (from left). The tilt images are aligned to a common center using IPET through iterative refinement. The projections of the raw, intermediate, and final 3D reconstruction at the corresponding angles are displayed in the subsequent four columns. **b**, A central cross-section (~23 nm thick) of the final reconstruction before masking is applied. **c**, 3D views of the central cross-section. **d**, Final 3D density map of this particle, viewed from four perpendicular directions. **e**, Final 3D reconstruction superimposed with the fitted model, viewed from four perpendicular directions. **f**, FSC analyses of the final map resolution using two methods: map-map FSC, where each map is reconstructed from one half of the images (even vs. odd tilt angle indices), and map-model FSC, where the model map is generated from the fitted model. Resolution assessments are provided based on tilt-based map-map and map-model FSC analyses at thresholds of FSC=0.5 and 0.143, respectively.



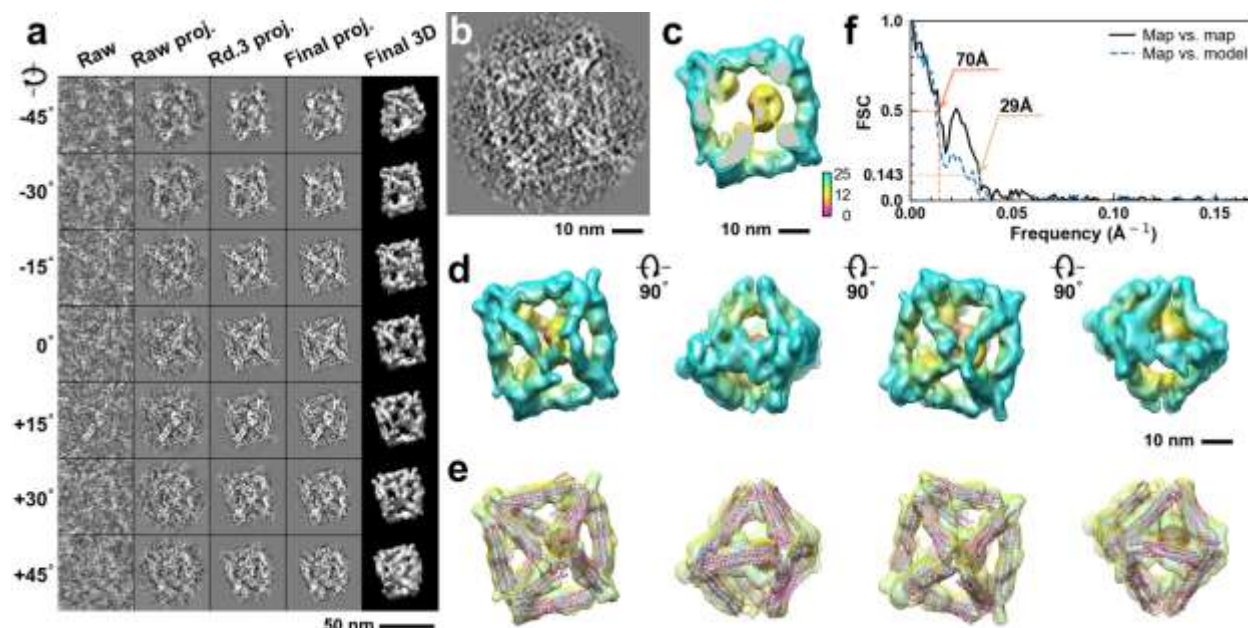

**Supplementary Fig. 66: IPET 3D reconstruction and model fitting of an individual unit-cell particle (Index: 058) within a 2D lattice with 100% ferritin loading.** **a**, Seven representative tilt images of a single unit-cell particle are shown in the first column (from left). The tilt images are aligned to a common center using IPET through iterative refinement. The projections of the raw, intermediate, and final 3D reconstruction at the corresponding angles are displayed in the subsequent four columns. **b**, A central cross-section (~23 nm thick) of the final reconstruction before masking is applied. **c**, 3D views of the central cross-section. **d**, Final 3D density map of this particle, viewed from four perpendicular directions. **e**, Final 3D reconstruction superimposed with the fitted model, viewed from four perpendicular directions. **f**, FSC analyses of the final map resolution using two methods: map-map FSC, where each map is reconstructed from one half of the images (even vs. odd tilt angle indices), and map-model FSC, where the model map is generated from the fitted model. Resolution assessments are provided based on tilt-based map-map and map-model FSC analyses at thresholds of FSC=0.5 and 0.143, respectively.

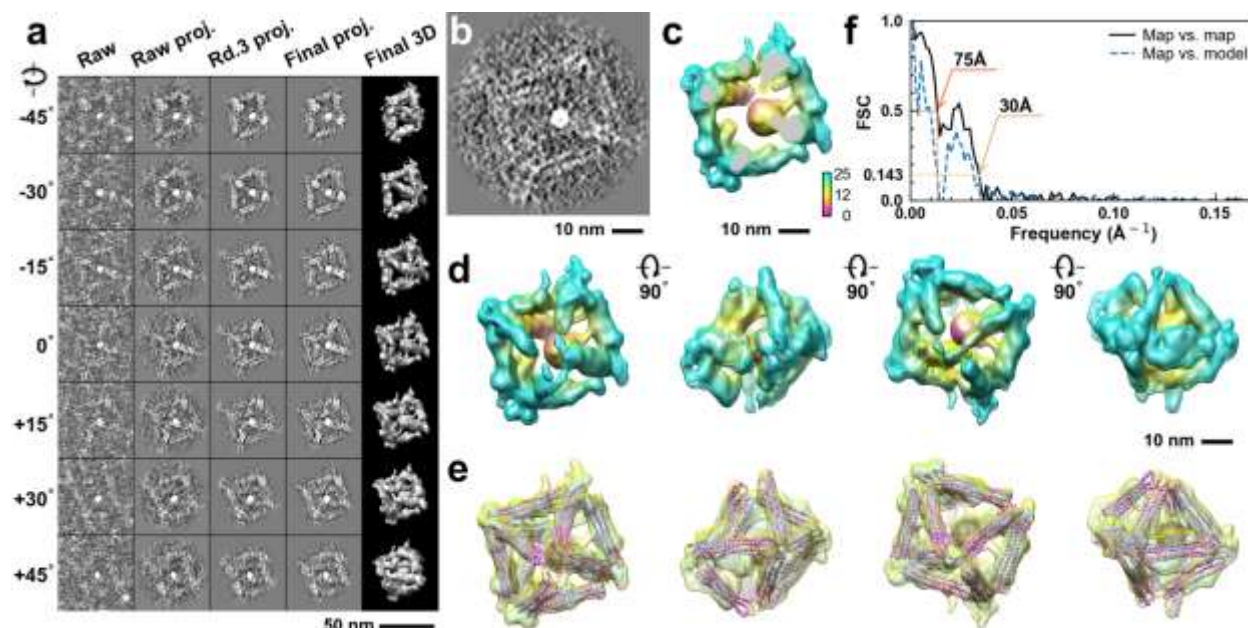

**Supplementary Fig. 67: IPET 3D reconstruction and model fitting of an individual unit-cell particle (Index: 059) within a 2D lattice with 100% ferritin loading.** **a**, Seven representative tilt images of a single unit-cell particle are shown in the first column (from left). The tilt images are aligned to a common center using IPET through iterative refinement. The projections of the raw, intermediate, and final 3D reconstruction at the corresponding angles are displayed in the subsequent four columns. **b**, A central cross-section (~23 nm thick) of the final reconstruction before masking is applied. **c**, 3D views of the central cross-section. **d**, Final 3D density map of this particle, viewed from four perpendicular directions. **e**, Final 3D reconstruction superimposed with the fitted model, viewed from four perpendicular directions. **f**, FSC analyses of the final map resolution using two methods: map-map FSC, where each map is reconstructed from one half of the images (even vs. odd tilt angle indices), and map-model FSC, where the model map is generated from the fitted model. Resolution assessments are provided based on tilt-based map-map and map-model FSC analyses at thresholds of FSC=0.5 and 0.143, respectively.

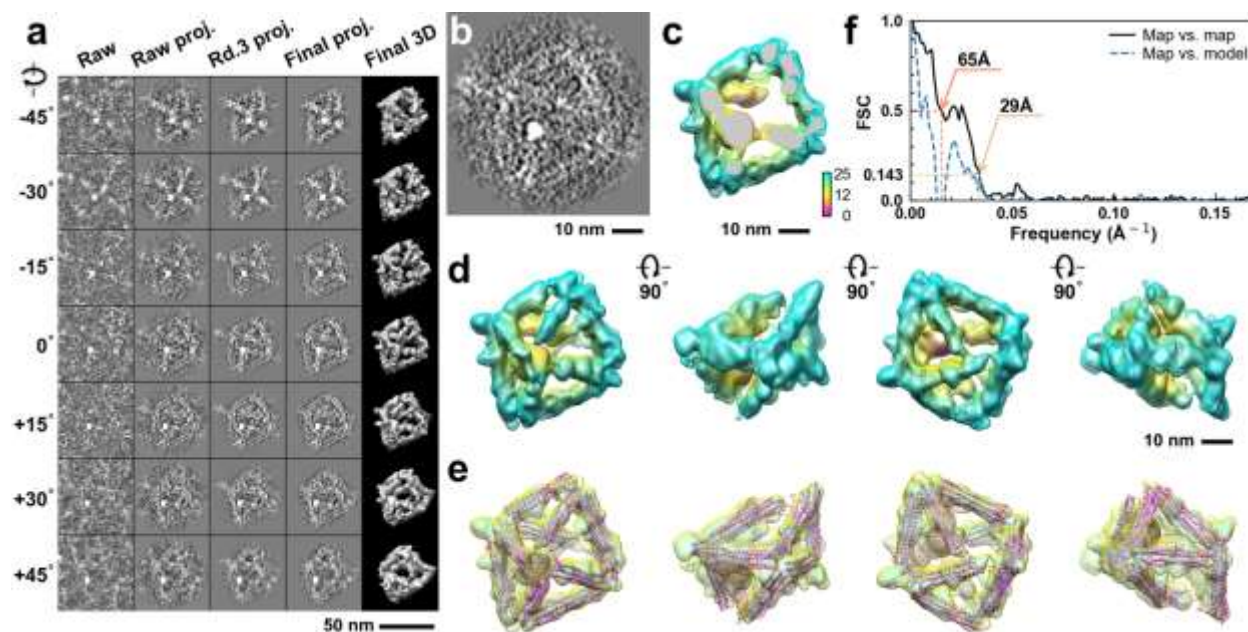

**Supplementary Fig. 68: IPET 3D reconstruction and model fitting of an individual unit-cell particle (Index: 060) within a 2D lattice with 100% ferritin loading.** **a**, Seven representative tilt images of a single unit-cell particle are shown in the first column (from left). The tilt images are aligned to a common center using IPET through iterative refinement. The projections of the raw, intermediate, and final 3D reconstruction at the corresponding angles are displayed in the subsequent four columns. **b**, A central cross-section (~23 nm thick) of the final reconstruction before masking is applied. **c**, 3D views of the central cross-section. **d**, Final 3D density map of this particle, viewed from four perpendicular directions. **e**, Final 3D reconstruction superimposed with the fitted model, viewed from four perpendicular directions. **f**, FSC analyses of the final map resolution using two methods: map-map FSC, where each map is reconstructed from one half of the images (even vs. odd tilt angle indices), and map-model FSC, where the model map is generated from the fitted model. Resolution assessments are provided based on tilt-based map-map and map-model FSC analyses at thresholds of FSC=0.5 and 0.143, respectively.

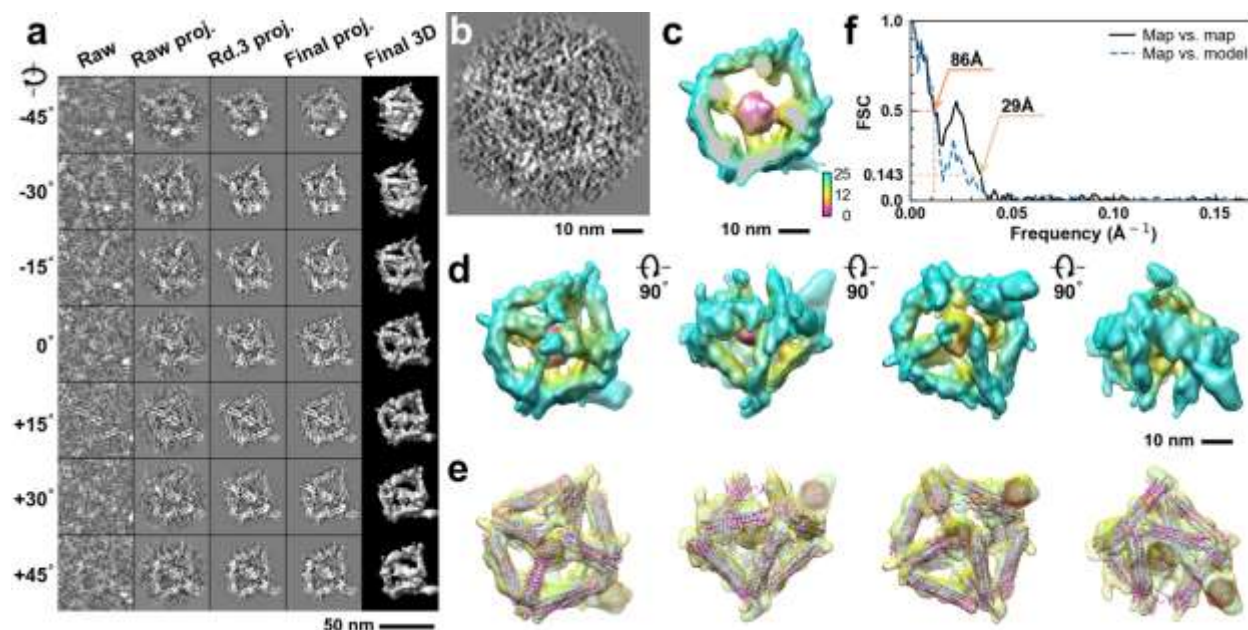

**Supplementary Fig. 69: IPET 3D reconstruction and model fitting of an individual unit-cell particle (Index: 061) within a 2D lattice with 100% ferritin loading.** **a**, Seven representative tilt images of a single unit-cell particle are shown in the first column (from left). The tilt images are aligned to a common center using IPET through iterative refinement. The projections of the raw, intermediate, and final 3D reconstruction at the corresponding angles are displayed in the subsequent four columns. **b**, A central cross-section (~23 nm thick) of the final reconstruction before masking is applied. **c**, 3D views of the central cross-section. **d**, Final 3D density map of this particle, viewed from four perpendicular directions. **e**, Final 3D reconstruction superimposed with the fitted model, viewed from four perpendicular directions. **f**, FSC analyses of the final map resolution using two methods: map-map FSC, where each map is reconstructed from one half of the images (even vs. odd tilt angle indices), and map-model FSC, where the model map is generated from the fitted model. Resolution assessments are provided based on tilt-based map-map and map-model FSC analyses at thresholds of FSC=0.5 and 0.143, respectively.



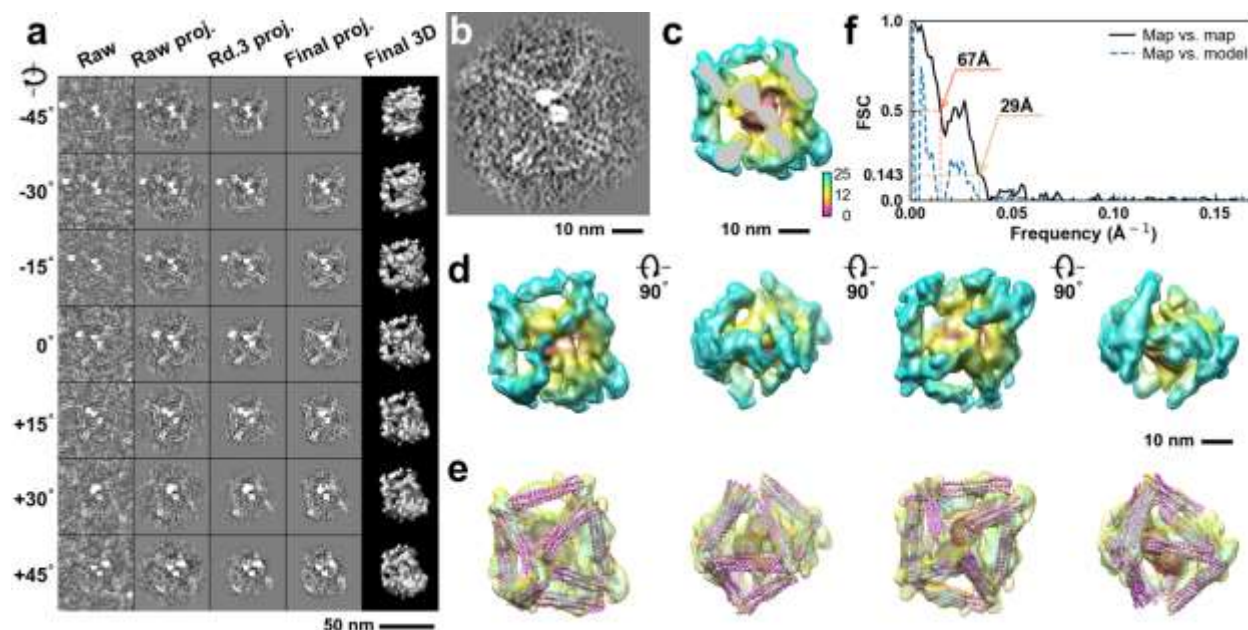

**Supplementary Fig. 70: IPET 3D reconstruction and model fitting of an individual unit-cell particle (Index: 062) within a 2D lattice with 100% ferritin loading.** **a**, Seven representative tilt images of a single unit-cell particle are shown in the first column (from left). The tilt images are aligned to a common center using IPET through iterative refinement. The projections of the raw, intermediate, and final 3D reconstruction at the corresponding angles are displayed in the subsequent four columns. **b**, A central cross-section (~23 nm thick) of the final reconstruction before masking is applied. **c**, 3D views of the central cross-section. **d**, Final 3D density map of this particle, viewed from four perpendicular directions. **e**, Final 3D reconstruction superimposed with the fitted model, viewed from four perpendicular directions. **f**, FSC analyses of the final map resolution using two methods: map-map FSC, where each map is reconstructed from one half of the images (even vs. odd tilt angle indices), and map-model FSC, where the model map is generated from the fitted model. Resolution assessments are provided based on tilt-based map-map and map-model FSC analyses at thresholds of FSC=0.5 and 0.143, respectively.

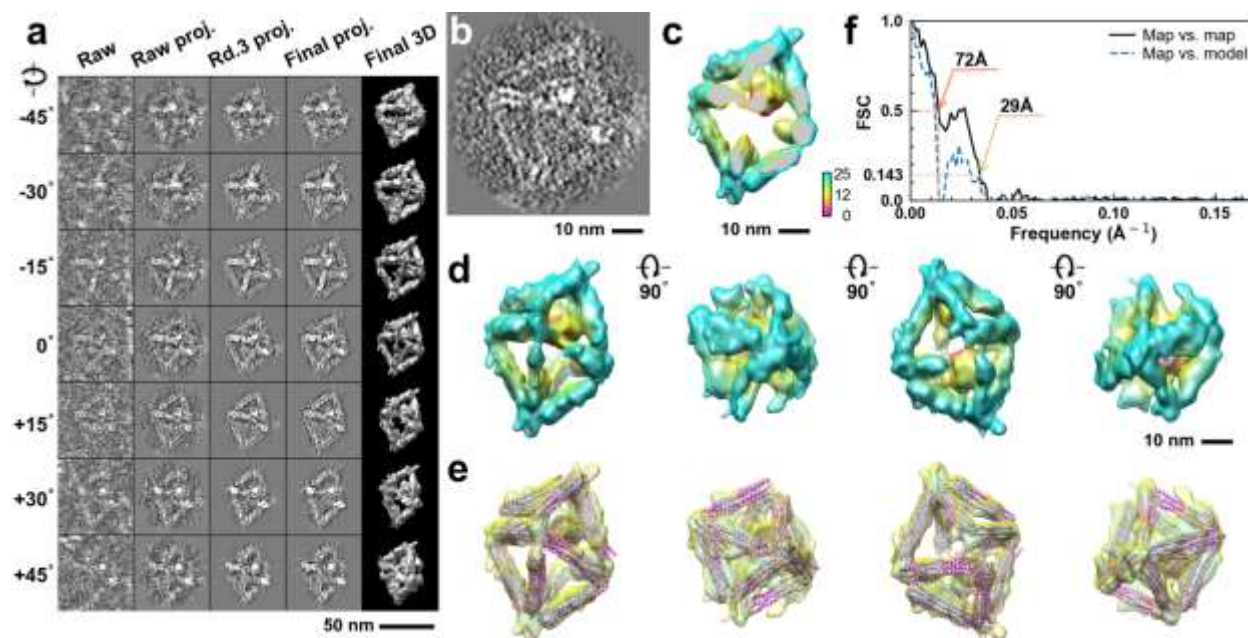

**Supplementary Fig. 71: IPET 3D reconstruction and model fitting of an individual unit-cell particle (Index: 063) within a 2D lattice with 100% ferritin loading.** **a**, Seven representative tilt images of a single unit-cell particle are shown in the first column (from left). The tilt images are aligned to a common center using IPET through iterative refinement. The projections of the raw, intermediate, and final 3D reconstruction at the corresponding angles are displayed in the subsequent four columns. **b**, A central cross-section (~23 nm thick) of the final reconstruction before masking is applied. **c**, 3D views of the central cross-section. **d**, Final 3D density map of this particle, viewed from four perpendicular directions. **e**, Final 3D reconstruction superimposed with the fitted model, viewed from four perpendicular directions. **f**, FSC analyses of the final map resolution using two methods: map-map FSC, where each map is reconstructed from one half of the images (even vs. odd tilt angle indices), and map-model FSC, where the model map is generated from the fitted model. Resolution assessments are provided based on tilt-based map-map and map-model FSC analyses at thresholds of FSC=0.5 and 0.143, respectively.

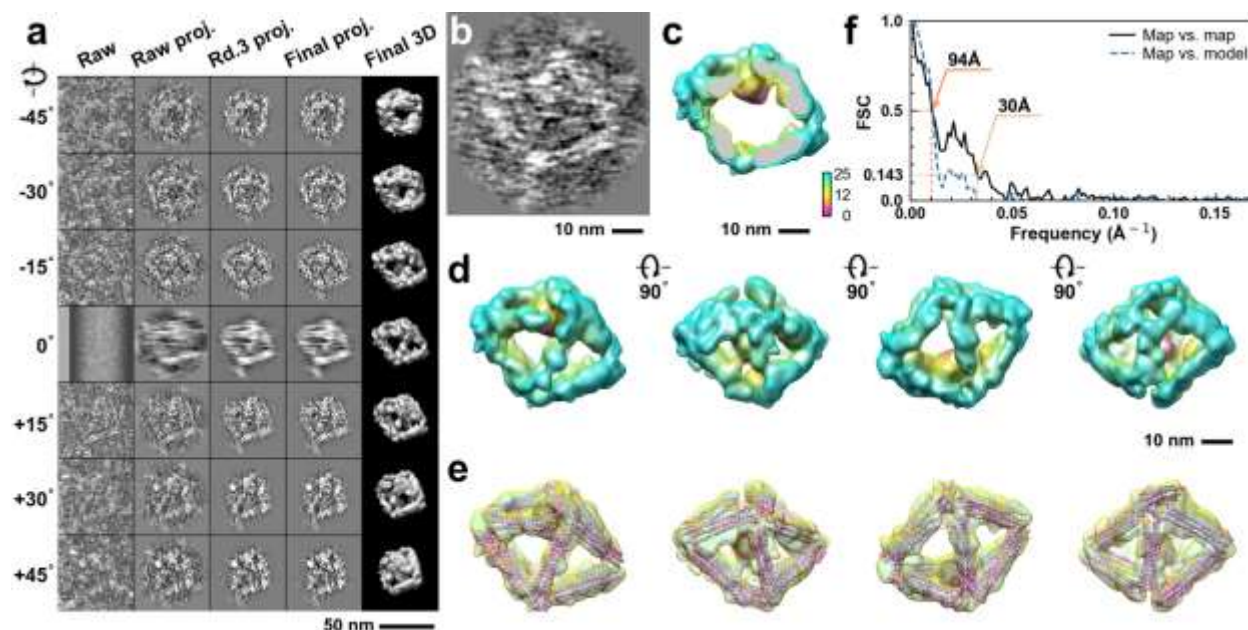

**Supplementary Fig. 72: IPET 3D reconstruction and model fitting of an individual unit-cell particle (Index: 064) within a 2D lattice with 100% ferritin loading.** **a**, Seven representative tilt images of a single unit-cell particle are shown in the first column (from left). The tilt images are aligned to a common center using IPET through iterative refinement. The projections of the raw, intermediate, and final 3D reconstruction at the corresponding angles are displayed in the subsequent four columns. **b**, A central cross-section (~23 nm thick) of the final reconstruction before masking is applied. **c**, 3D views of the central cross-section. **d**, Final 3D density map of this particle, viewed from four perpendicular directions. **e**, Final 3D reconstruction superimposed with the fitted model, viewed from four perpendicular directions. **f**, FSC analyses of the final map resolution using two methods: map-map FSC, where each map is reconstructed from one half of the images (even vs. odd tilt angle indices), and map-model FSC, where the model map is generated from the fitted model. Resolution assessments are provided based on tilt-based map-map and map-model FSC analyses at thresholds of FSC=0.5 and 0.143, respectively.

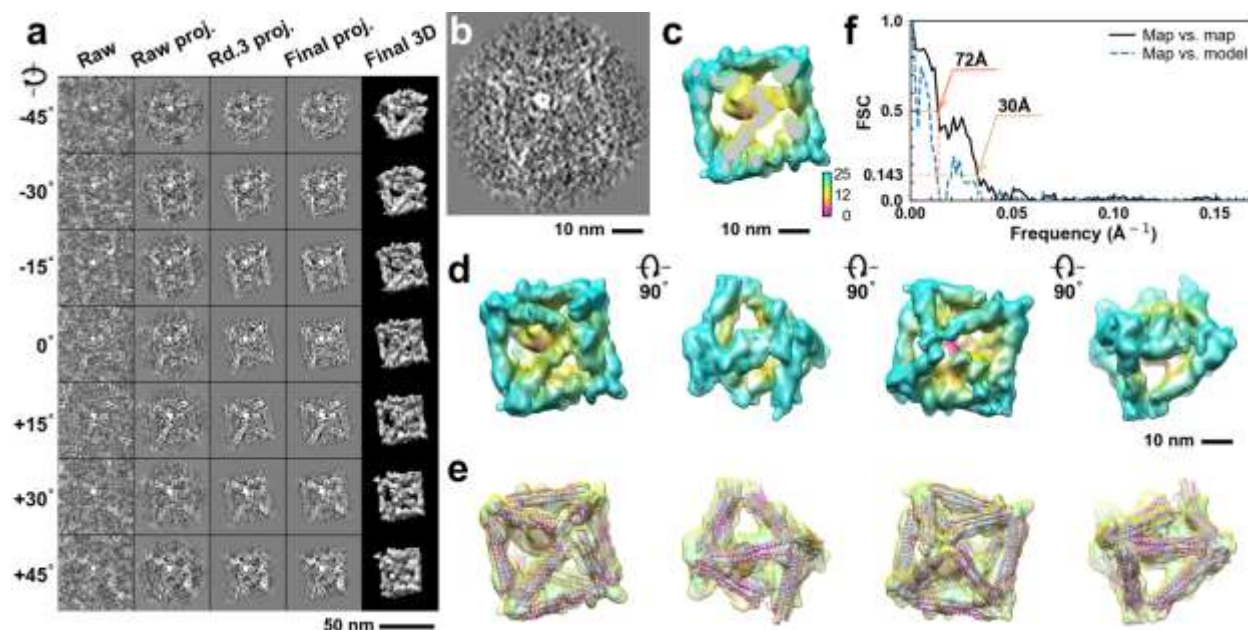

**Supplementary Fig. 73: IPET 3D reconstruction and model fitting of an individual unit-cell particle (Index: 065) within a 2D lattice with 100% ferritin loading.** **a**, Seven representative tilt images of a single unit-cell particle are shown in the first column (from left). The tilt images are aligned to a common center using IPET through iterative refinement. The projections of the raw, intermediate, and final 3D reconstruction at the corresponding angles are displayed in the subsequent four columns. **b**, A central cross-section (~23 nm thick) of the final reconstruction before masking is applied. **c**, 3D views of the central cross-section. **d**, Final 3D density map of this particle, viewed from four perpendicular directions. **e**, Final 3D reconstruction superimposed with the fitted model, viewed from four perpendicular directions. **f**, FSC analyses of the final map resolution using two methods: map-map FSC, where each map is reconstructed from one half of the images (even vs. odd tilt angle indices), and map-model FSC, where the model map is generated from the fitted model. Resolution assessments are provided based on tilt-based map-map and map-model FSC analyses at thresholds of FSC=0.5 and 0.143, respectively.



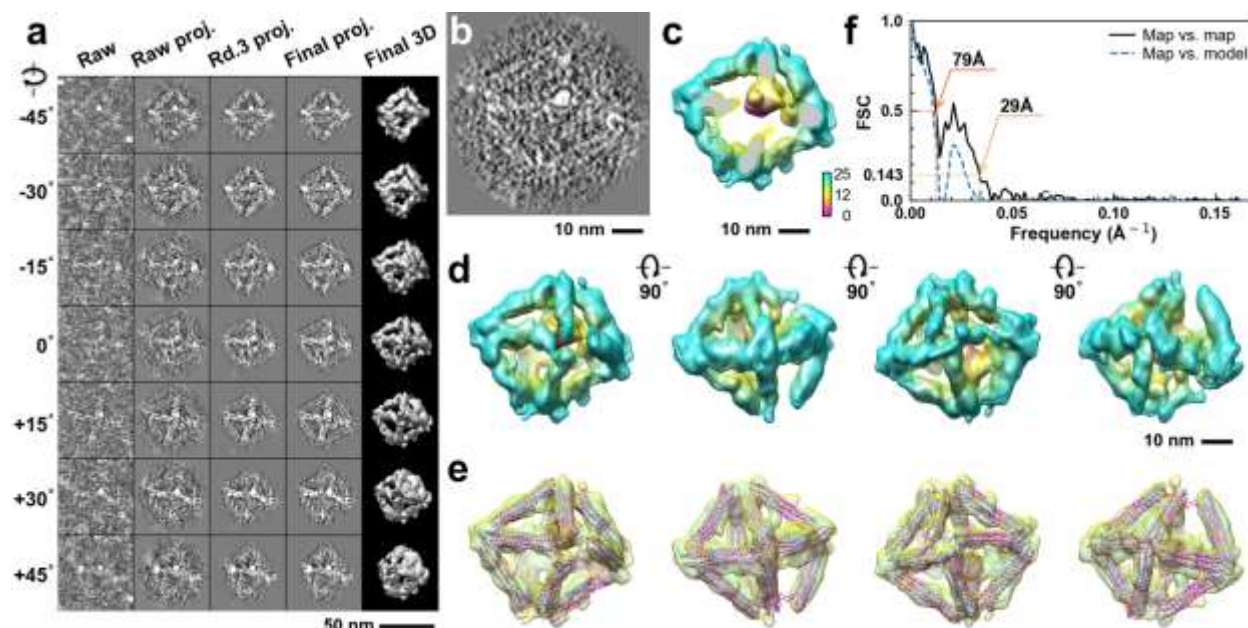

**Supplementary Fig. 74: IPET 3D reconstruction and model fitting of an individual unit-cell particle (Index: 066) within a 2D lattice with 100% ferritin loading.** **a**, Seven representative tilt images of a single unit-cell particle are shown in the first column (from left). The tilt images are aligned to a common center using IPET through iterative refinement. The projections of the raw, intermediate, and final 3D reconstruction at the corresponding angles are displayed in the subsequent four columns. **b**, A central cross-section (~23 nm thick) of the final reconstruction before masking is applied. **c**, 3D views of the central cross-section. **d**, Final 3D density map of this particle, viewed from four perpendicular directions. **e**, Final 3D reconstruction superimposed with the fitted model, viewed from four perpendicular directions. **f**, FSC analyses of the final map resolution using two methods: map-map FSC, where each map is reconstructed from one half of the images (even vs. odd tilt angle indices), and map-model FSC, where the model map is generated from the fitted model. Resolution assessments are provided based on tilt-based map-map and map-model FSC analyses at thresholds of FSC=0.5 and 0.143, respectively.

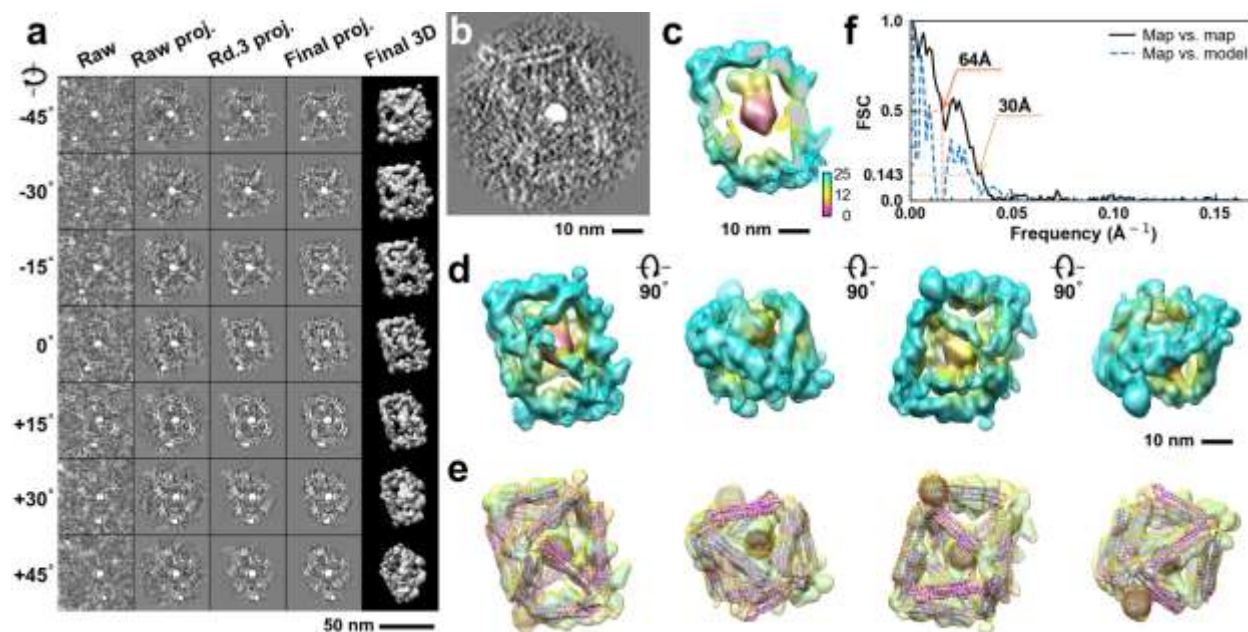

**Supplementary Fig. 75: IPET 3D reconstruction and model fitting of an individual unit-cell particle (Index: 067) within a 2D lattice with 100% ferritin loading.** **a**, Seven representative tilt images of a single unit-cell particle are shown in the first column (from left). The tilt images are aligned to a common center using IPET through iterative refinement. The projections of the raw, intermediate, and final 3D reconstruction at the corresponding angles are displayed in the subsequent four columns. **b**, A central cross-section (~23 nm thick) of the final reconstruction before masking is applied. **c**, 3D views of the central cross-section. **d**, Final 3D density map of this particle, viewed from four perpendicular directions. **e**, Final 3D reconstruction superimposed with the fitted model, viewed from four perpendicular directions. **f**, FSC analyses of the final map resolution using two methods: map-map FSC, where each map is reconstructed from one half of the images (even vs. odd tilt angle indices), and map-model FSC, where the model map is generated from the fitted model. Resolution assessments are provided based on tilt-based map-map and map-model FSC analyses at thresholds of FSC=0.5 and 0.143, respectively.

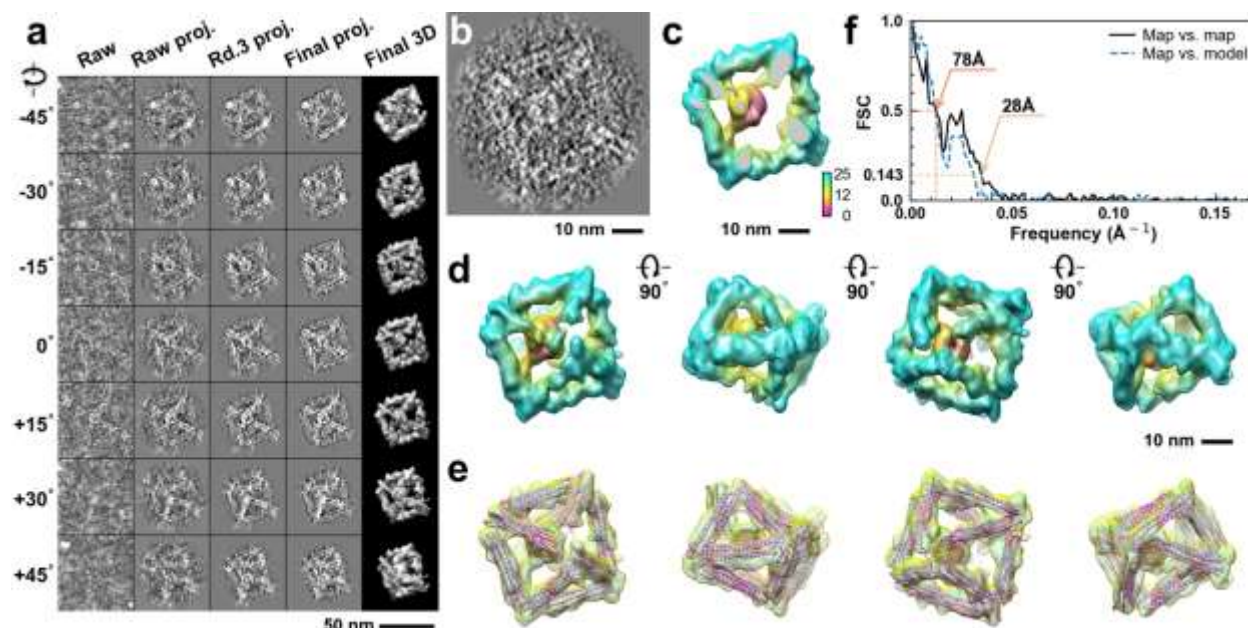

**Supplementary Fig. 76: IPET 3D reconstruction and model fitting of an individual unit-cell particle (Index: 068) within a 2D lattice with 100% ferritin loading.** **a**, Seven representative tilt images of a single unit-cell particle are shown in the first column (from left). The tilt images are aligned to a common center using IPET through iterative refinement. The projections of the raw, intermediate, and final 3D reconstruction at the corresponding angles are displayed in the subsequent four columns. **b**, A central cross-section (~23 nm thick) of the final reconstruction before masking is applied. **c**, 3D views of the central cross-section. **d**, Final 3D density map of this particle, viewed from four perpendicular directions. **e**, Final 3D reconstruction superimposed with the fitted model, viewed from four perpendicular directions. **f**, FSC analyses of the final map resolution using two methods: map-map FSC, where each map is reconstructed from one half of the images (even vs. odd tilt angle indices), and map-model FSC, where the model map is generated from the fitted model. Resolution assessments are provided based on tilt-based map-map and map-model FSC analyses at thresholds of FSC=0.5 and 0.143, respectively.

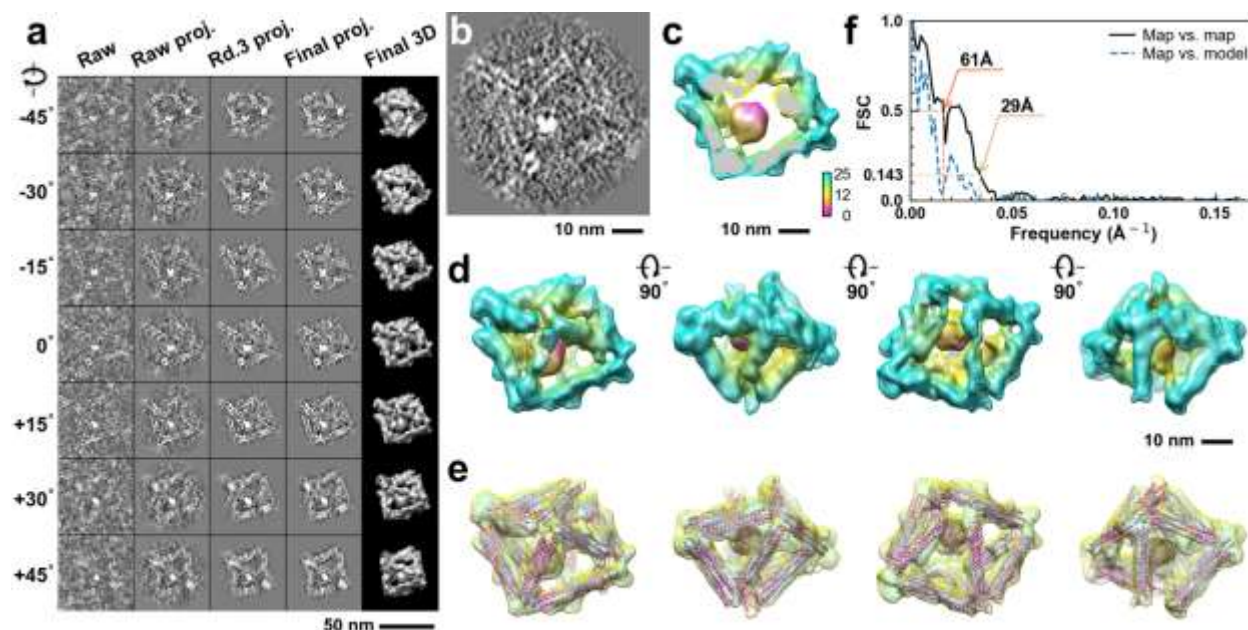

**Supplementary Fig. 77: IPET 3D reconstruction and model fitting of an individual unit-cell particle (Index: 069) within a 2D lattice with 100% ferritin loading.** **a**, Seven representative tilt images of a single unit-cell particle are shown in the first column (from left). The tilt images are aligned to a common center using IPET through iterative refinement. The projections of the raw, intermediate, and final 3D reconstruction at the corresponding angles are displayed in the subsequent four columns. **b**, A central cross-section (~23 nm thick) of the final reconstruction before masking is applied. **c**, 3D views of the central cross-section. **d**, Final 3D density map of this particle, viewed from four perpendicular directions. **e**, Final 3D reconstruction superimposed with the fitted model, viewed from four perpendicular directions. **f**, FSC analyses of the final map resolution using two methods: map-map FSC, where each map is reconstructed from one half of the images (even vs. odd tilt angle indices), and map-model FSC, where the model map is generated from the fitted model. Resolution assessments are provided based on tilt-based map-map and map-model FSC analyses at thresholds of FSC=0.5 and 0.143, respectively.



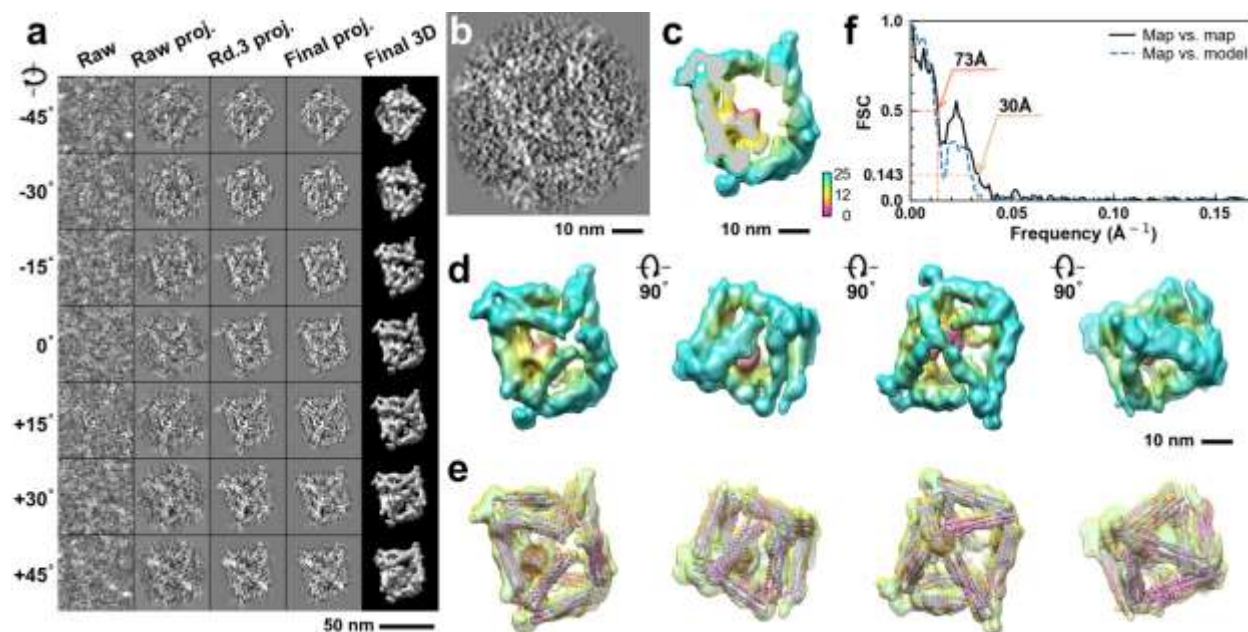

**Supplementary Fig. 78: IPET 3D reconstruction and model fitting of an individual unit-cell particle (Index: 070) within a 2D lattice with 100% ferritin loading.** **a**, Seven representative tilt images of a single unit-cell particle are shown in the first column (from left). The tilt images are aligned to a common center using IPET through iterative refinement. The projections of the raw, intermediate, and final 3D reconstruction at the corresponding angles are displayed in the subsequent four columns. **b**, A central cross-section (~23 nm thick) of the final reconstruction before masking is applied. **c**, 3D views of the central cross-section. **d**, Final 3D density map of this particle, viewed from four perpendicular directions. **e**, Final 3D reconstruction superimposed with the fitted model, viewed from four perpendicular directions. **f**, FSC analyses of the final map resolution using two methods: map-map FSC, where each map is reconstructed from one half of the images (even vs. odd tilt angle indices), and map-model FSC, where the model map is generated from the fitted model. Resolution assessments are provided based on tilt-based map-map and map-model FSC analyses at thresholds of FSC=0.5 and 0.143, respectively.

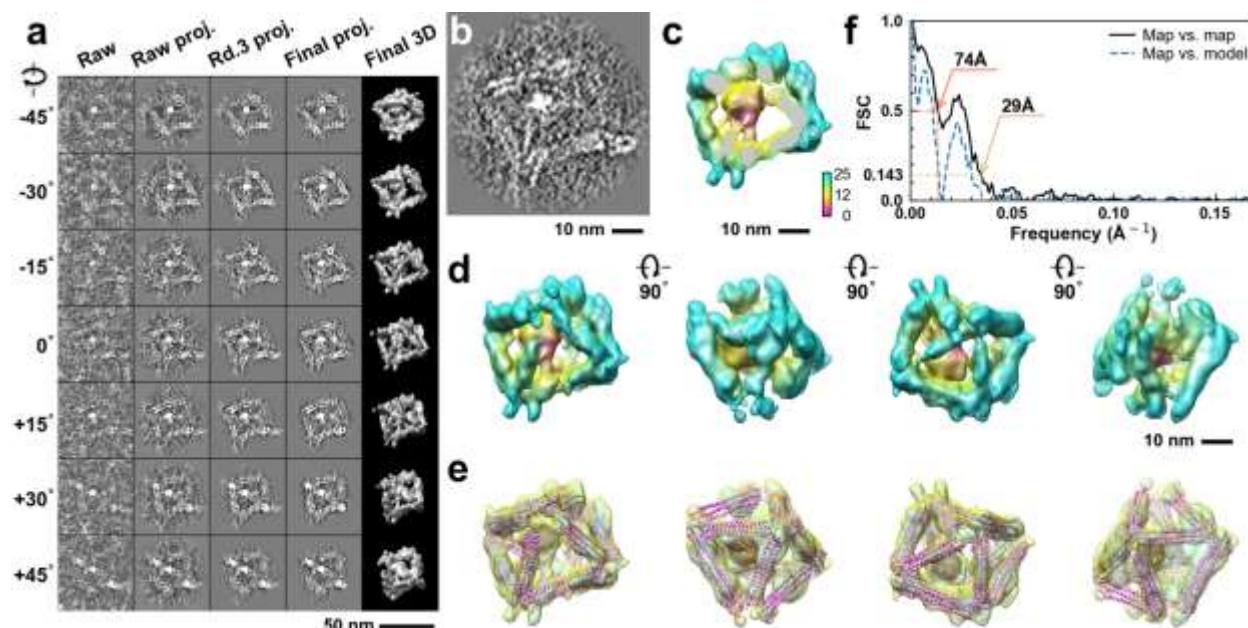

**Supplementary Fig. 79: IPET 3D reconstruction and model fitting of an individual unit-cell particle (Index: 071) within a 2D lattice with 100% ferritin loading.** **a**, Seven representative tilt images of a single unit-cell particle are shown in the first column (from left). The tilt images are aligned to a common center using IPET through iterative refinement. The projections of the raw, intermediate, and final 3D reconstruction at the corresponding angles are displayed in the subsequent four columns. **b**, A central cross-section (~23 nm thick) of the final reconstruction before masking is applied. **c**, 3D views of the central cross-section. **d**, Final 3D density map of this particle, viewed from four perpendicular directions. **e**, Final 3D reconstruction superimposed with the fitted model, viewed from four perpendicular directions. **f**, FSC analyses of the final map resolution using two methods: map-map FSC, where each map is reconstructed from one half of the images (even vs. odd tilt angle indices), and map-model FSC, where the model map is generated from the fitted model. Resolution assessments are provided based on tilt-based map-map and map-model FSC analyses at thresholds of FSC=0.5 and 0.143, respectively.

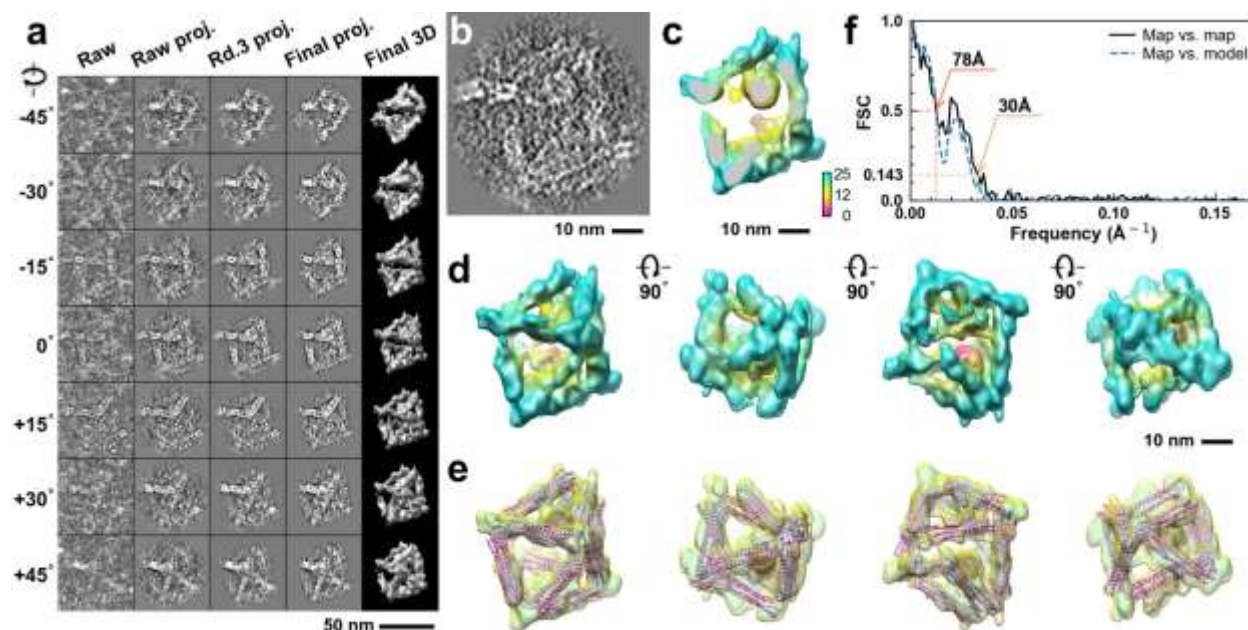

**Supplementary Fig. 80: IPET 3D reconstruction and model fitting of an individual unit-cell particle (Index: 072) within a 2D lattice with 100% ferritin loading.** **a**, Seven representative tilt images of a single unit-cell particle are shown in the first column (from left). The tilt images are aligned to a common center using IPET through iterative refinement. The projections of the raw, intermediate, and final 3D reconstruction at the corresponding angles are displayed in the subsequent four columns. **b**, A central cross-section (~23 nm thick) of the final reconstruction before masking is applied. **c**, 3D views of the central cross-section. **d**, Final 3D density map of this particle, viewed from four perpendicular directions. **e**, Final 3D reconstruction superimposed with the fitted model, viewed from four perpendicular directions. **f**, FSC analyses of the final map resolution using two methods: map-map FSC, where each map is reconstructed from one half of the images (even vs. odd tilt angle indices), and map-model FSC, where the model map is generated from the fitted model. Resolution assessments are provided based on tilt-based map-map and map-model FSC analyses at thresholds of FSC=0.5 and 0.143, respectively.

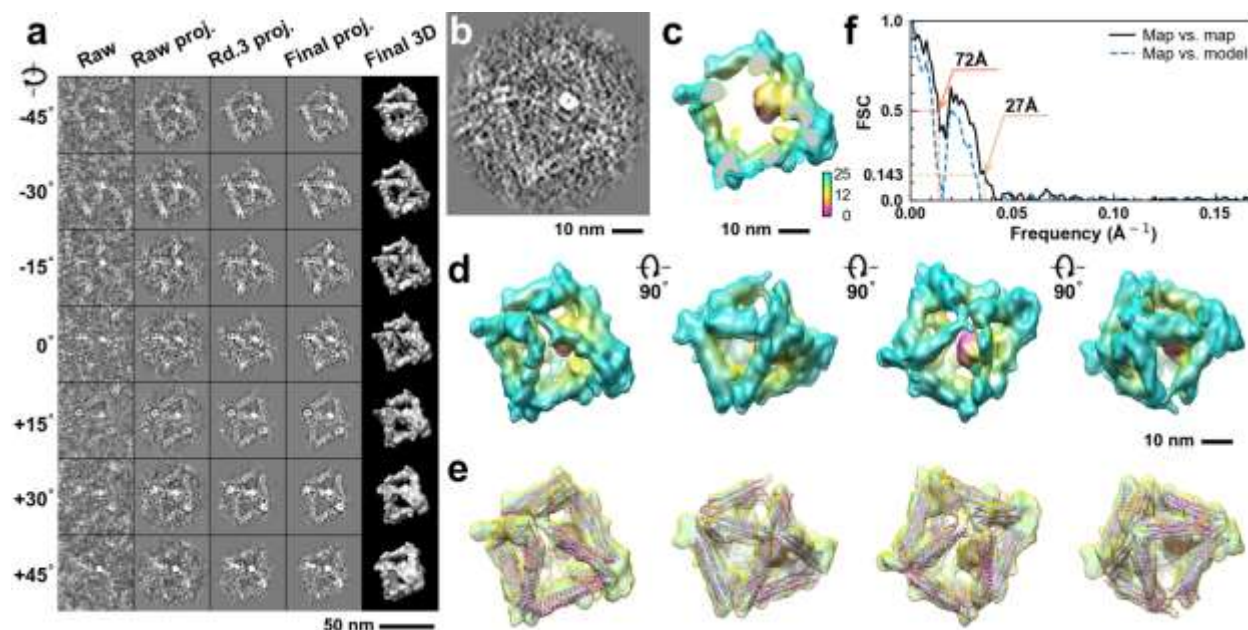

**Supplementary Fig. 81: IPET 3D reconstruction and model fitting of an individual unit-cell particle (Index: 073) within a 2D lattice with 100% ferritin loading.** **a**, Seven representative tilt images of a single unit-cell particle are shown in the first column (from left). The tilt images are aligned to a common center using IPET through iterative refinement. The projections of the raw, intermediate, and final 3D reconstruction at the corresponding angles are displayed in the subsequent four columns. **b**, A central cross-section (~23 nm thick) of the final reconstruction before masking is applied. **c**, 3D views of the central cross-section. **d**, Final 3D density map of this particle, viewed from four perpendicular directions. **e**, Final 3D reconstruction superimposed with the fitted model, viewed from four perpendicular directions. **f**, FSC analyses of the final map resolution using two methods: map-map FSC, where each map is reconstructed from one half of the images (even vs. odd tilt angle indices), and map-model FSC, where the model map is generated from the fitted model. Resolution assessments are provided based on tilt-based map-map and map-model FSC analyses at thresholds of FSC=0.5 and 0.143, respectively.



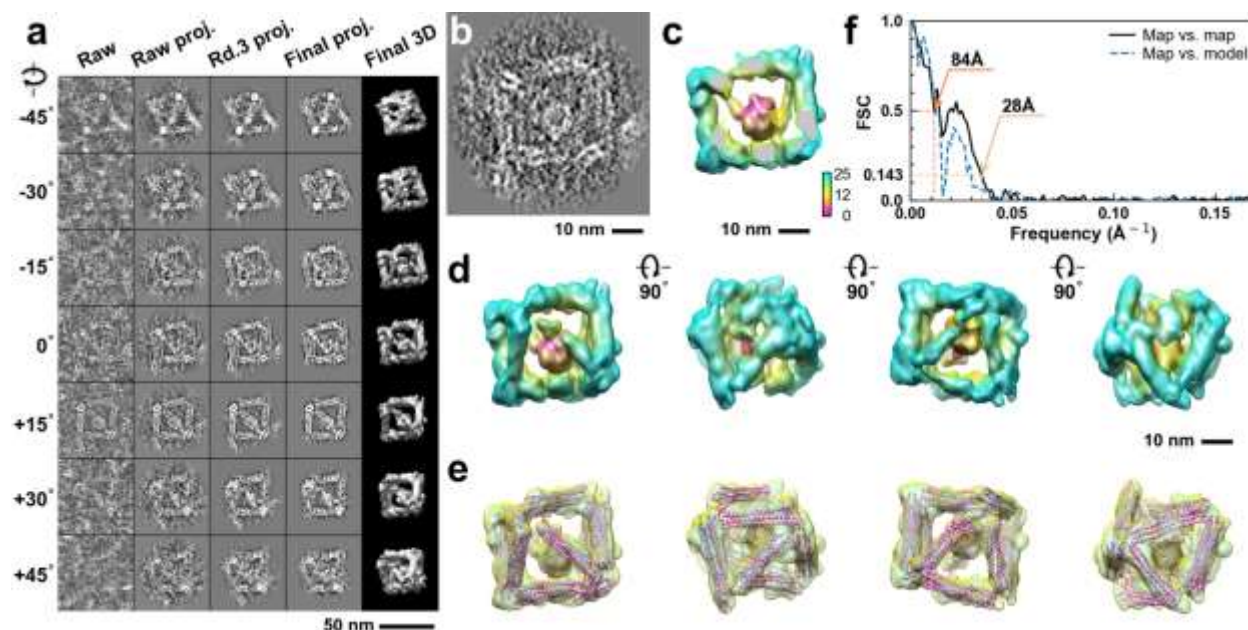

**Supplementary Fig. 82: IPET 3D reconstruction and model fitting of an individual unit-cell particle (Index: 074) within a 2D lattice with 100% ferritin loading.** **a**, Seven representative tilt images of a single unit-cell particle are shown in the first column (from left). The tilt images are aligned to a common center using IPET through iterative refinement. The projections of the raw, intermediate, and final 3D reconstruction at the corresponding angles are displayed in the subsequent four columns. **b**, A central cross-section (~23 nm thick) of the final reconstruction before masking is applied. **c**, 3D views of the central cross-section. **d**, Final 3D density map of this particle, viewed from four perpendicular directions. **e**, Final 3D reconstruction superimposed with the fitted model, viewed from four perpendicular directions. **f**, FSC analyses of the final map resolution using two methods: map-map FSC, where each map is reconstructed from one half of the images (even vs. odd tilt angle indices), and map-model FSC, where the model map is generated from the fitted model. Resolution assessments are provided based on tilt-based map-map and map-model FSC analyses at thresholds of FSC=0.5 and 0.143, respectively.

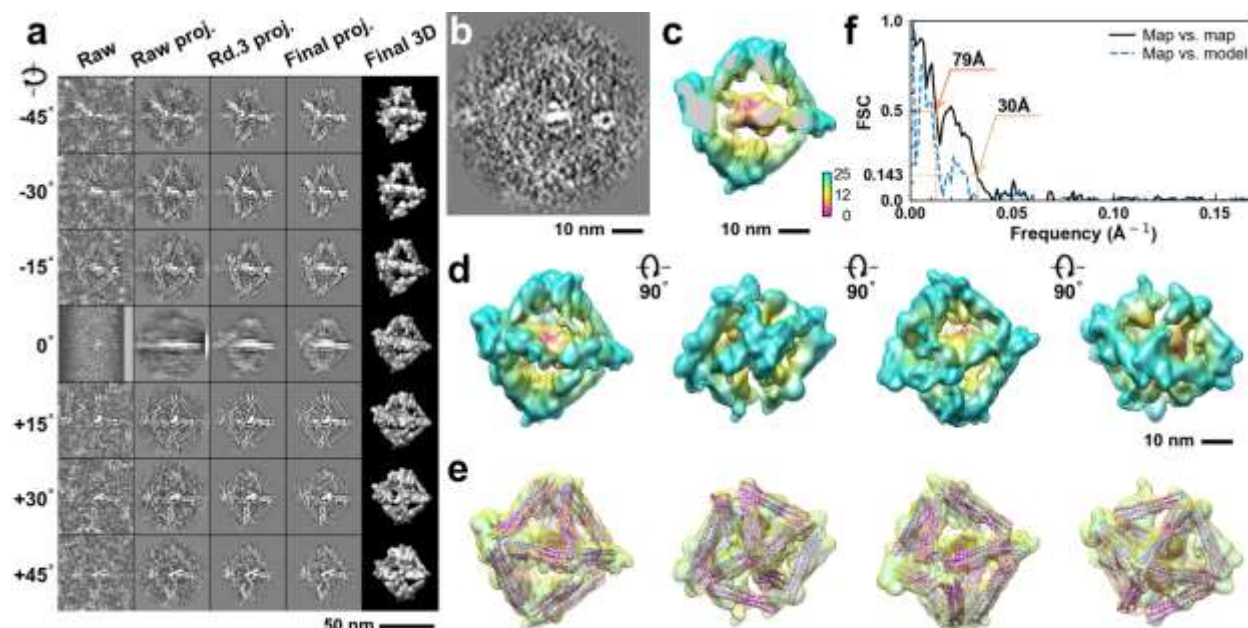

**Supplementary Fig. 83: IPET 3D reconstruction and model fitting of an individual unit-cell particle (Index: 075) within a 2D lattice with 100% ferritin loading.** **a**, Seven representative tilt images of a single unit-cell particle are shown in the first column (from left). The tilt images are aligned to a common center using IPET through iterative refinement. The projections of the raw, intermediate, and final 3D reconstruction at the corresponding angles are displayed in the subsequent four columns. **b**, A central cross-section (~23 nm thick) of the final reconstruction before masking is applied. **c**, 3D views of the central cross-section. **d**, Final 3D density map of this particle, viewed from four perpendicular directions. **e**, Final 3D reconstruction superimposed with the fitted model, viewed from four perpendicular directions. **f**, FSC analyses of the final map resolution using two methods: map-map FSC, where each map is reconstructed from one half of the images (even vs. odd tilt angle indices), and map-model FSC, where the model map is generated from the fitted model. Resolution assessments are provided based on tilt-based map-map and map-model FSC analyses at thresholds of FSC=0.5 and 0.143, respectively.

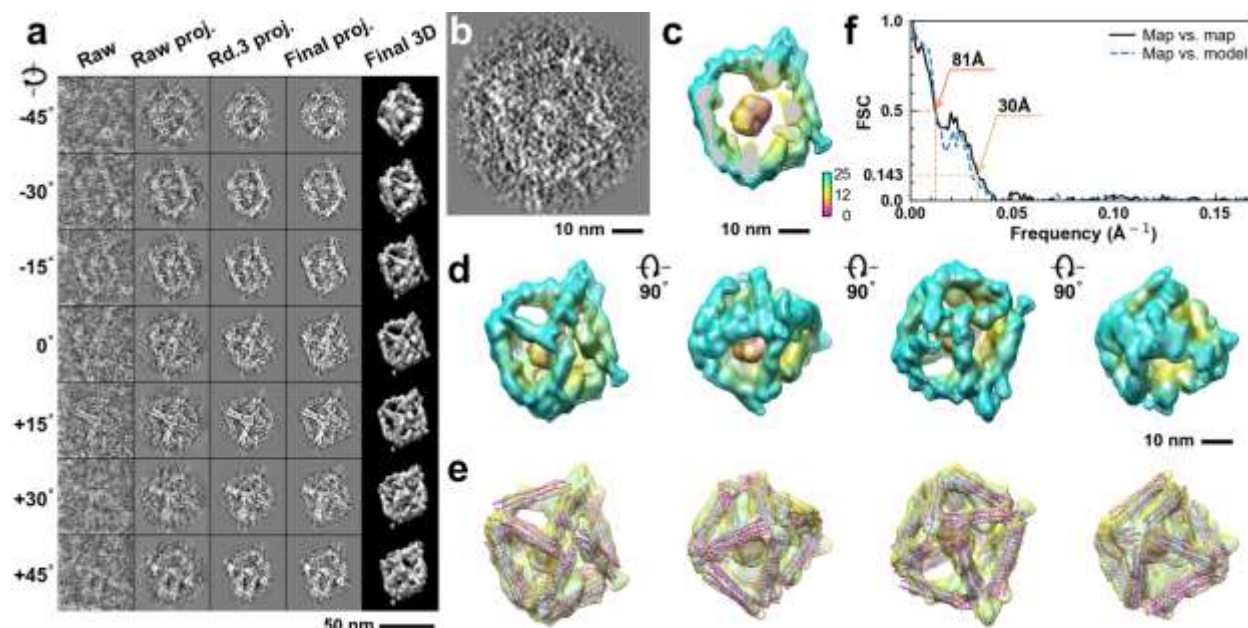

**Supplementary Fig. 84: IPET 3D reconstruction and model fitting of an individual unit-cell particle (Index: 076) within a 2D lattice with 100% ferritin loading.** **a**, Seven representative tilt images of a single unit-cell particle are shown in the first column (from left). The tilt images are aligned to a common center using IPET through iterative refinement. The projections of the raw, intermediate, and final 3D reconstruction at the corresponding angles are displayed in the subsequent four columns. **b**, A central cross-section (~23 nm thick) of the final reconstruction before masking is applied. **c**, 3D views of the central cross-section. **d**, Final 3D density map of this particle, viewed from four perpendicular directions. **e**, Final 3D reconstruction superimposed with the fitted model, viewed from four perpendicular directions. **f**, FSC analyses of the final map resolution using two methods: map-map FSC, where each map is reconstructed from one half of the images (even vs. odd tilt angle indices), and map-model FSC, where the model map is generated from the fitted model. Resolution assessments are provided based on tilt-based map-map and map-model FSC analyses at thresholds of FSC=0.5 and 0.143, respectively.

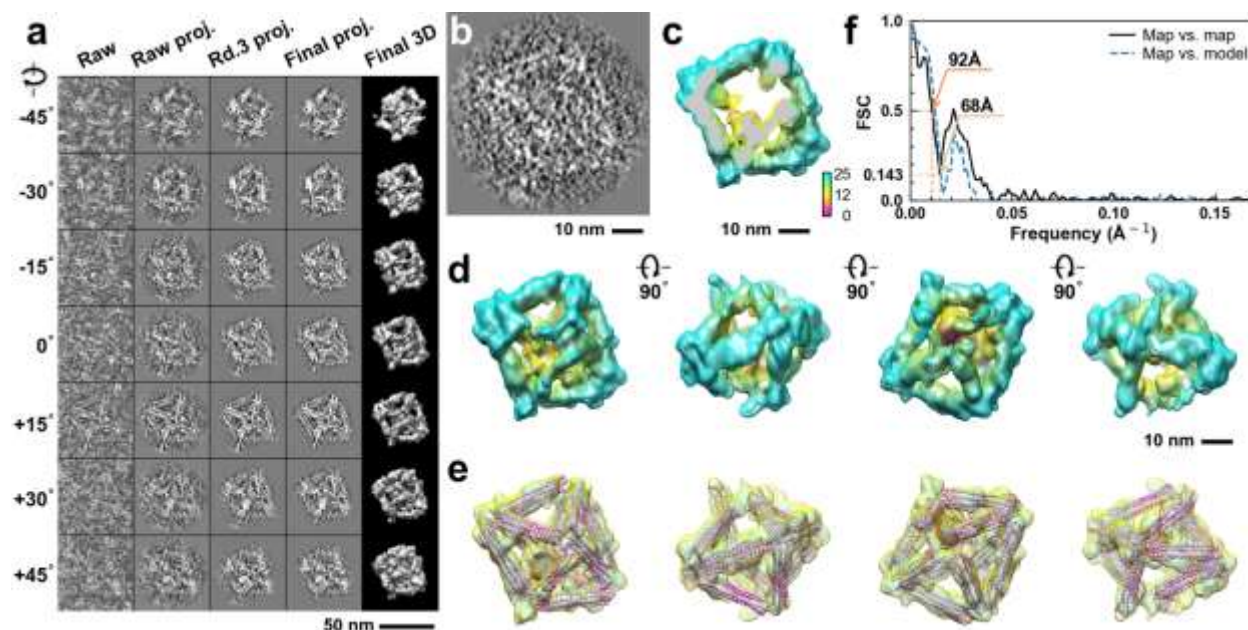

**Supplementary Fig. 85: IPET 3D reconstruction and model fitting of an individual unit-cell particle (Index: 077) within a 2D lattice with 100% ferritin loading.** **a**, Seven representative tilt images of a single unit-cell particle are shown in the first column (from left). The tilt images are aligned to a common center using IPET through iterative refinement. The projections of the raw, intermediate, and final 3D reconstruction at the corresponding angles are displayed in the subsequent four columns. **b**, A central cross-section (~23 nm thick) of the final reconstruction before masking is applied. **c**, 3D views of the central cross-section. **d**, Final 3D density map of this particle, viewed from four perpendicular directions. **e**, Final 3D reconstruction superimposed with the fitted model, viewed from four perpendicular directions. **f**, FSC analyses of the final map resolution using two methods: map-map FSC, where each map is reconstructed from one half of the images (even vs. odd tilt angle indices), and map-model FSC, where the model map is generated from the fitted model. Resolution assessments are provided based on tilt-based map-map and map-model FSC analyses at thresholds of FSC=0.5 and 0.143, respectively.



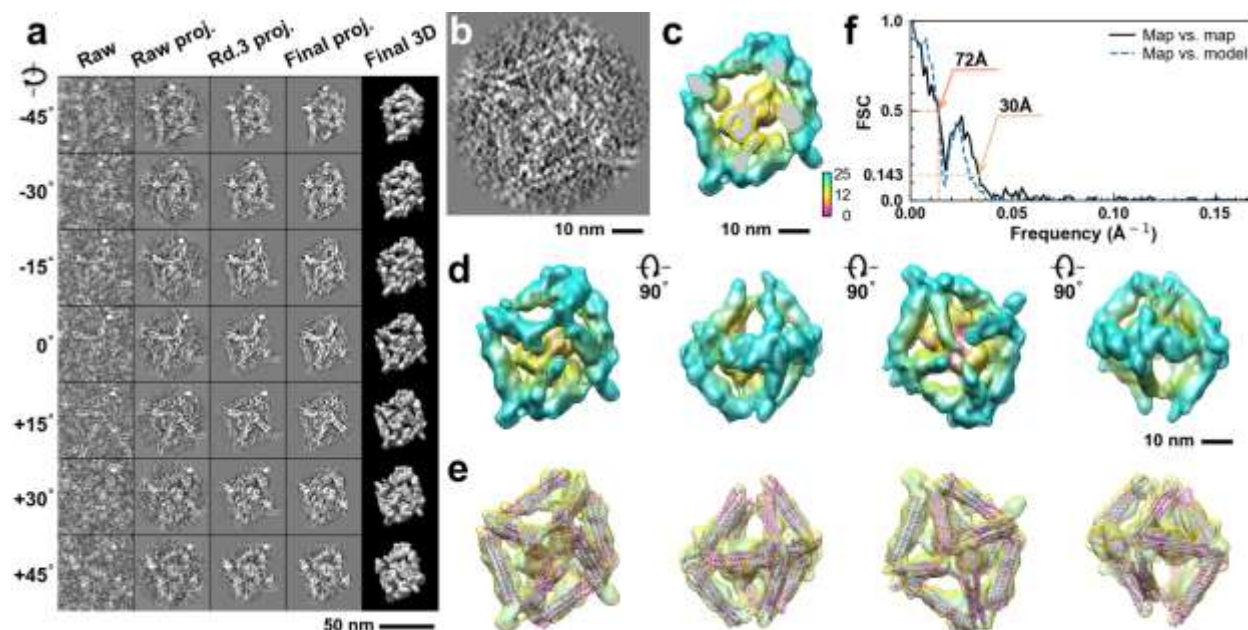

**Supplementary Fig. 86: IPET 3D reconstruction and model fitting of an individual unit-cell particle (Index: 078) within a 2D lattice with 100% ferritin loading.** **a**, Seven representative tilt images of a single unit-cell particle are shown in the first column (from left). The tilt images are aligned to a common center using IPET through iterative refinement. The projections of the raw, intermediate, and final 3D reconstruction at the corresponding angles are displayed in the subsequent four columns. **b**, A central cross-section (~23 nm thick) of the final reconstruction before masking is applied. **c**, 3D views of the central cross-section. **d**, Final 3D density map of this particle, viewed from four perpendicular directions. **e**, Final 3D reconstruction superimposed with the fitted model, viewed from four perpendicular directions. **f**, FSC analyses of the final map resolution using two methods: map-map FSC, where each map is reconstructed from one half of the images (even vs. odd tilt angle indices), and map-model FSC, where the model map is generated from the fitted model. Resolution assessments are provided based on tilt-based map-map and map-model FSC analyses at thresholds of FSC=0.5 and 0.143, respectively.

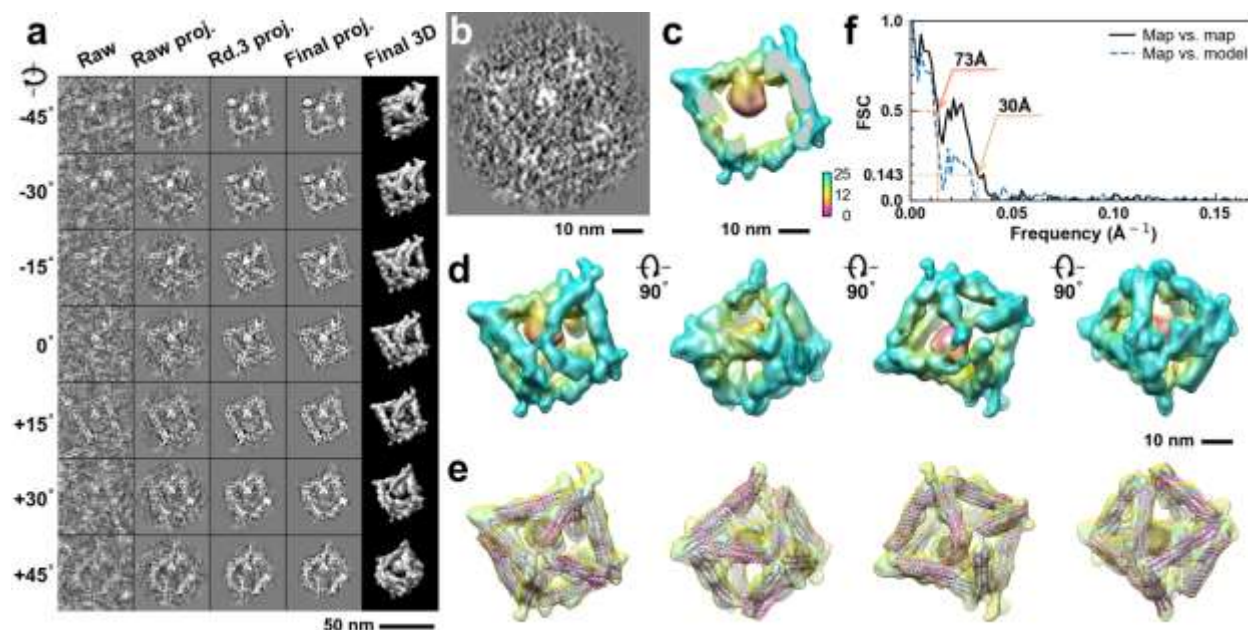

**Supplementary Fig. 87: IPET 3D reconstruction and model fitting of an individual unit-cell particle (Index: 079) within a 2D lattice with 100% ferritin loading.** **a**, Seven representative tilt images of a single unit-cell particle are shown in the first column (from left). The tilt images are aligned to a common center using IPET through iterative refinement. The projections of the raw, intermediate, and final 3D reconstruction at the corresponding angles are displayed in the subsequent four columns. **b**, A central cross-section (~23 nm thick) of the final reconstruction before masking is applied. **c**, 3D views of the central cross-section. **d**, Final 3D density map of this particle, viewed from four perpendicular directions. **e**, Final 3D reconstruction superimposed with the fitted model, viewed from four perpendicular directions. **f**, FSC analyses of the final map resolution using two methods: map-map FSC, where each map is reconstructed from one half of the images (even vs. odd tilt angle indices), and map-model FSC, where the model map is generated from the fitted model. Resolution assessments are provided based on tilt-based map-map and map-model FSC analyses at thresholds of FSC=0.5 and 0.143, respectively.

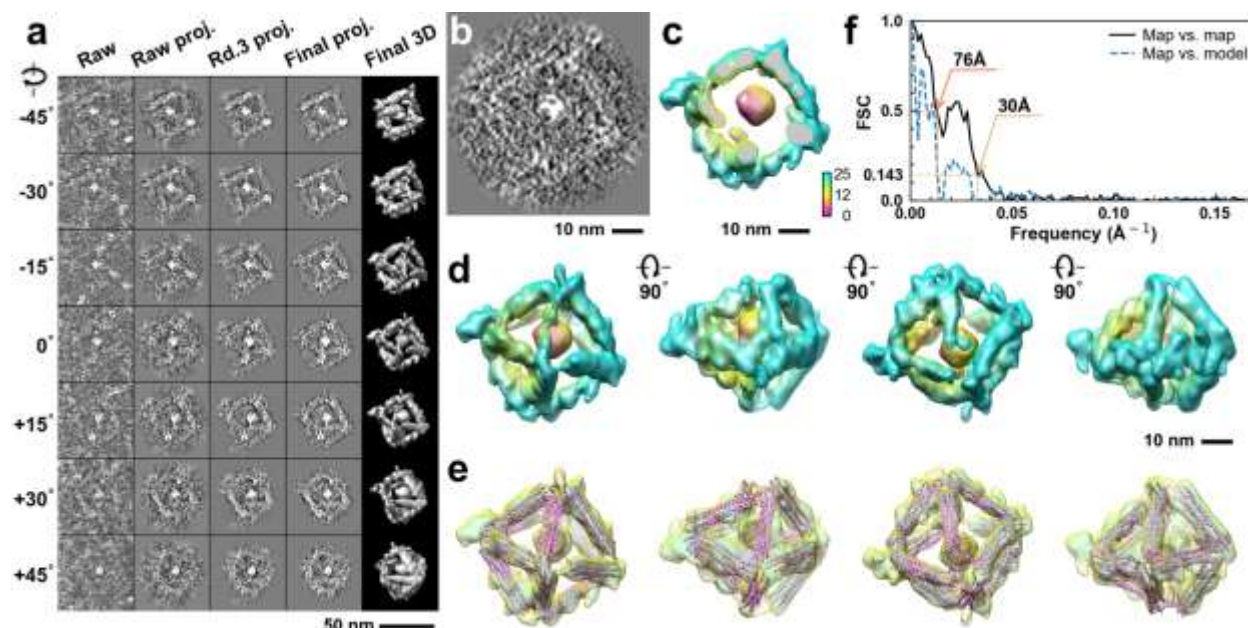

**Supplementary Fig. 88: IPET 3D reconstruction and model fitting of an individual unit-cell particle (Index: 080) within a 2D lattice with 100% ferritin loading.** **a**, Seven representative tilt images of a single unit-cell particle are shown in the first column (from left). The tilt images are aligned to a common center using IPET through iterative refinement. The projections of the raw, intermediate, and final 3D reconstruction at the corresponding angles are displayed in the subsequent four columns. **b**, A central cross-section (~23 nm thick) of the final reconstruction before masking is applied. **c**, 3D views of the central cross-section. **d**, Final 3D density map of this particle, viewed from four perpendicular directions. **e**, Final 3D reconstruction superimposed with the fitted model, viewed from four perpendicular directions. **f**, FSC analyses of the final map resolution using two methods: map-map FSC, where each map is reconstructed from one half of the images (even vs. odd tilt angle indices), and map-model FSC, where the model map is generated from the fitted model. Resolution assessments are provided based on tilt-based map-map and map-model FSC analyses at thresholds of FSC=0.5 and 0.143, respectively.

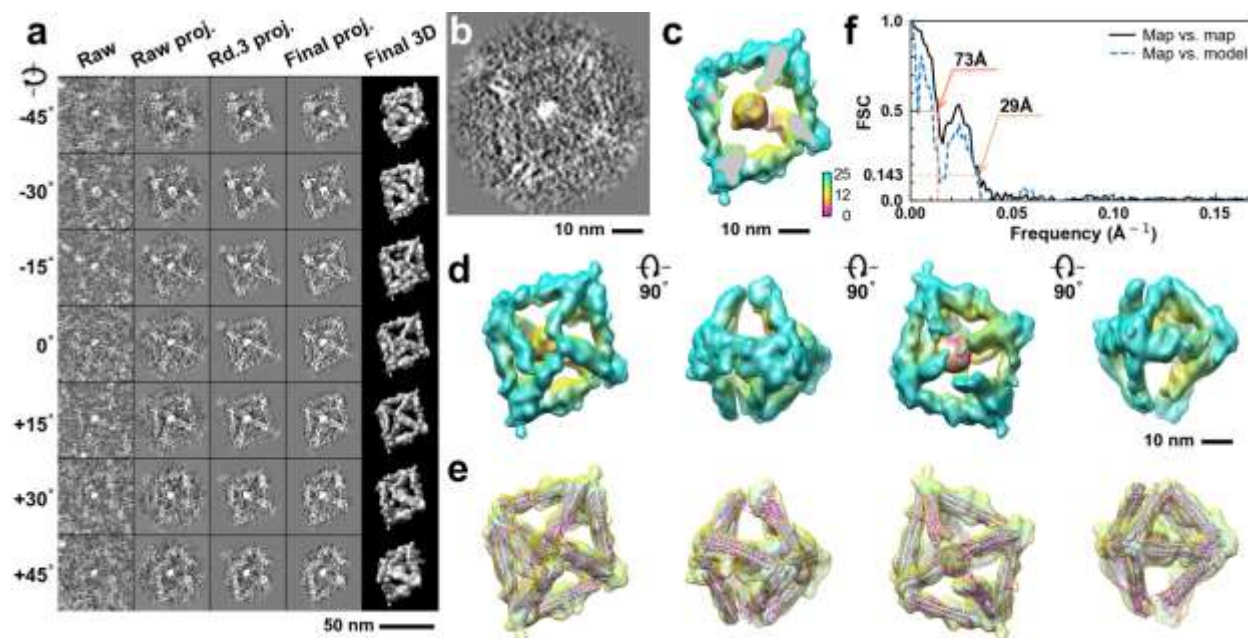

**Supplementary Fig. 89: IPET 3D reconstruction and model fitting of an individual unit-cell particle (Index: 081) within a 2D lattice with 100% ferritin loading.** **a**, Seven representative tilt images of a single unit-cell particle are shown in the first column (from left). The tilt images are aligned to a common center using IPET through iterative refinement. The projections of the raw, intermediate, and final 3D reconstruction at the corresponding angles are displayed in the subsequent four columns. **b**, A central cross-section (~23 nm thick) of the final reconstruction before masking is applied. **c**, 3D views of the central cross-section. **d**, Final 3D density map of this particle, viewed from four perpendicular directions. **e**, Final 3D reconstruction superimposed with the fitted model, viewed from four perpendicular directions. **f**, FSC analyses of the final map resolution using two methods: map-map FSC, where each map is reconstructed from one half of the images (even vs. odd tilt angle indices), and map-model FSC, where the model map is generated from the fitted model. Resolution assessments are provided based on tilt-based map-map and map-model FSC analyses at thresholds of FSC=0.5 and 0.143, respectively.



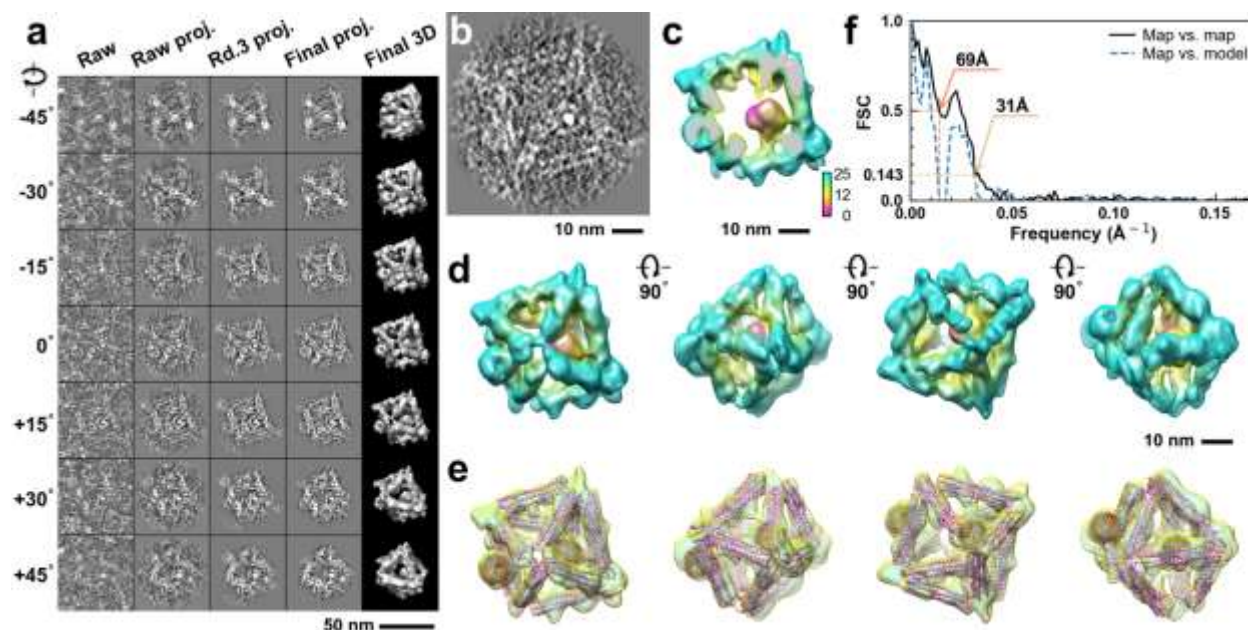

**Supplementary Fig. 90: IPET 3D reconstruction and model fitting of an individual unit-cell particle (Index: 082) within a 2D lattice with 100% ferritin loading.** **a**, Seven representative tilt images of a single unit-cell particle are shown in the first column (from left). The tilt images are aligned to a common center using IPET through iterative refinement. The projections of the raw, intermediate, and final 3D reconstruction at the corresponding angles are displayed in the subsequent four columns. **b**, A central cross-section (~23 nm thick) of the final reconstruction before masking is applied. **c**, 3D views of the central cross-section. **d**, Final 3D density map of this particle, viewed from four perpendicular directions. **e**, Final 3D reconstruction superimposed with the fitted model, viewed from four perpendicular directions. **f**, FSC analyses of the final map resolution using two methods: map-map FSC, where each map is reconstructed from one half of the images (even vs. odd tilt angle indices), and map-model FSC, where the model map is generated from the fitted model. Resolution assessments are provided based on tilt-based map-map and map-model FSC analyses at thresholds of FSC=0.5 and 0.143, respectively.

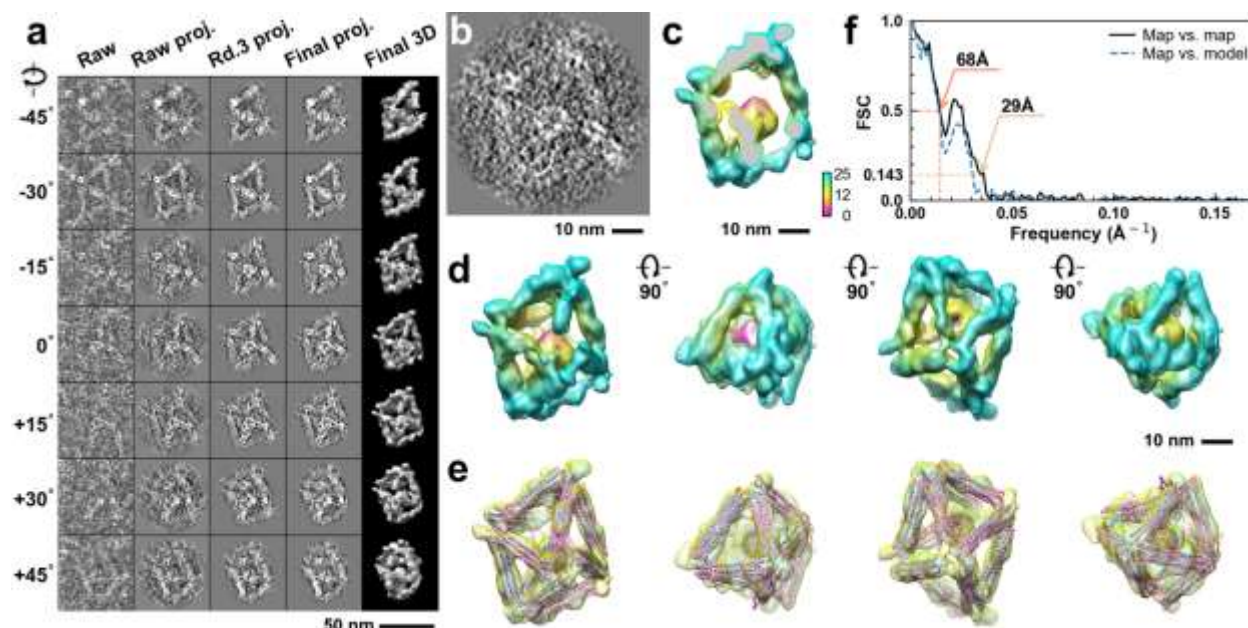

**Supplementary Fig. 91: IPET 3D reconstruction and model fitting of an individual unit-cell particle (Index: 083) within a 2D lattice with 100% ferritin loading.** **a**, Seven representative tilt images of a single unit-cell particle are shown in the first column (from left). The tilt images are aligned to a common center using IPET through iterative refinement. The projections of the raw, intermediate, and final 3D reconstruction at the corresponding angles are displayed in the subsequent four columns. **b**, A central cross-section (~23 nm thick) of the final reconstruction before masking is applied. **c**, 3D views of the central cross-section. **d**, Final 3D density map of this particle, viewed from four perpendicular directions. **e**, Final 3D reconstruction superimposed with the fitted model, viewed from four perpendicular directions. **f**, FSC analyses of the final map resolution using two methods: map-map FSC, where each map is reconstructed from one half of the images (even vs. odd tilt angle indices), and map-model FSC, where the model map is generated from the fitted model. Resolution assessments are provided based on tilt-based map-map and map-model FSC analyses at thresholds of FSC=0.5 and 0.143, respectively.

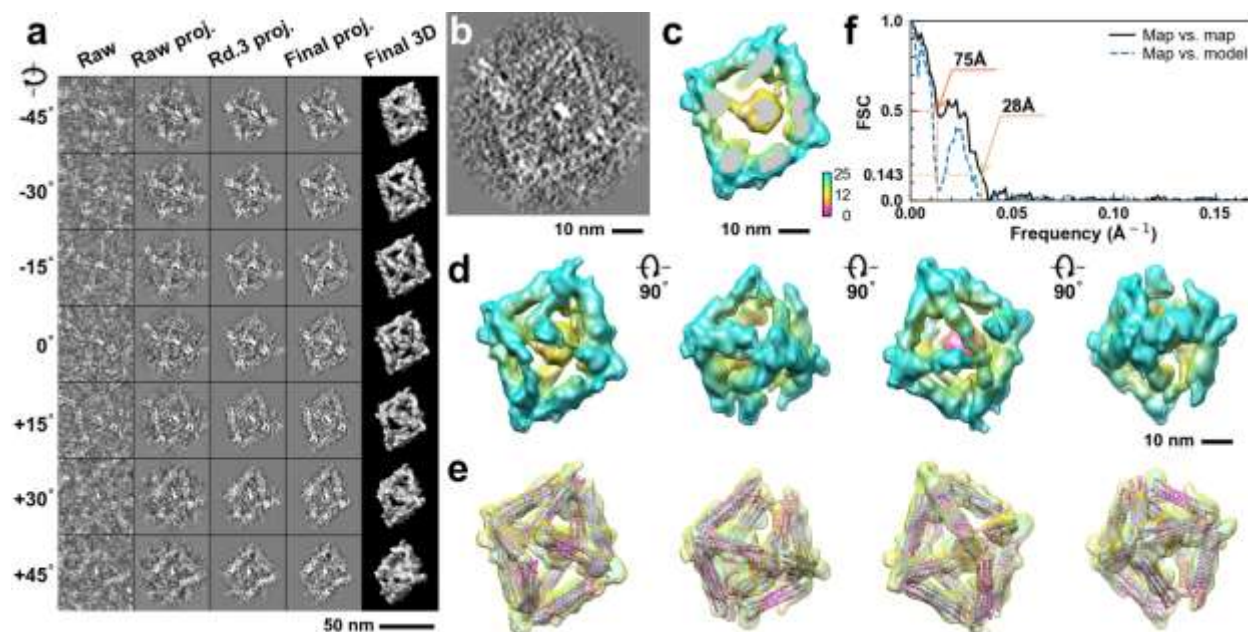

**Supplementary Fig. 92: IPET 3D reconstruction and model fitting of an individual unit-cell particle (Index: 084) within a 2D lattice with 100% ferritin loading.** **a**, Seven representative tilt images of a single unit-cell particle are shown in the first column (from left). The tilt images are aligned to a common center using IPET through iterative refinement. The projections of the raw, intermediate, and final 3D reconstruction at the corresponding angles are displayed in the subsequent four columns. **b**, A central cross-section (~23 nm thick) of the final reconstruction before masking is applied. **c**, 3D views of the central cross-section. **d**, Final 3D density map of this particle, viewed from four perpendicular directions. **e**, Final 3D reconstruction superimposed with the fitted model, viewed from four perpendicular directions. **f**, FSC analyses of the final map resolution using two methods: map-map FSC, where each map is reconstructed from one half of the images (even vs. odd tilt angle indices), and map-model FSC, where the model map is generated from the fitted model. Resolution assessments are provided based on tilt-based map-map and map-model FSC analyses at thresholds of FSC=0.5 and 0.143, respectively.

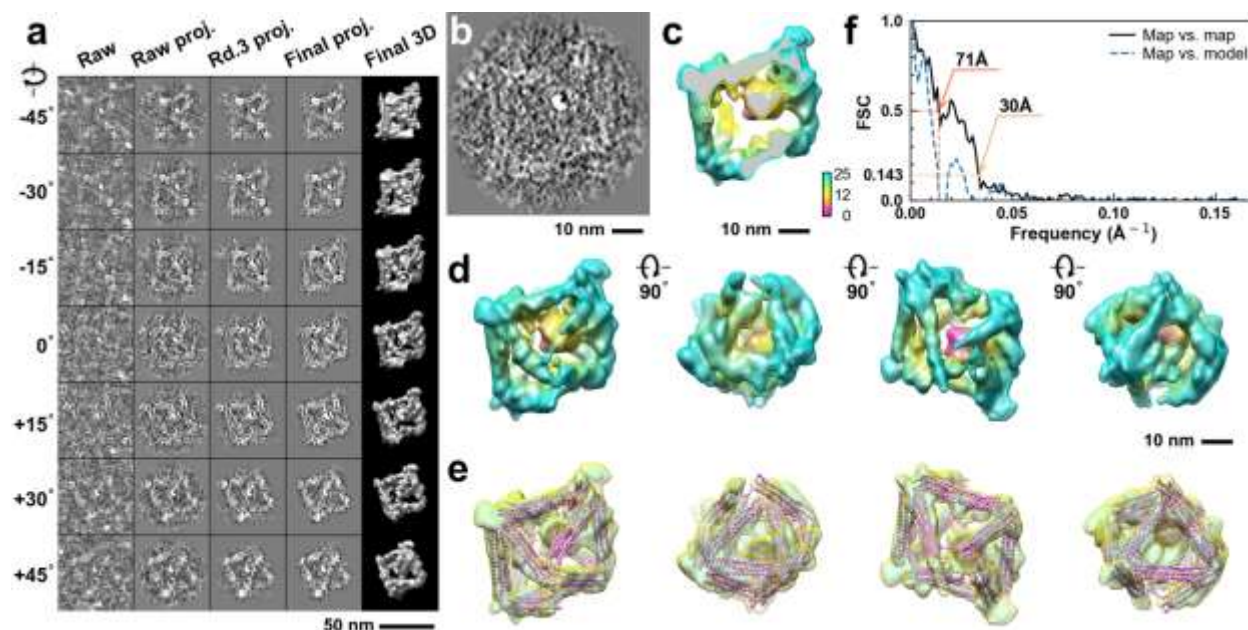

**Supplementary Fig. 93: IPET 3D reconstruction and model fitting of an individual unit-cell particle (Index: 085) within a 2D lattice with 100% ferritin loading.** **a**, Seven representative tilt images of a single unit-cell particle are shown in the first column (from left). The tilt images are aligned to a common center using IPET through iterative refinement. The projections of the raw, intermediate, and final 3D reconstruction at the corresponding angles are displayed in the subsequent four columns. **b**, A central cross-section (~23 nm thick) of the final reconstruction before masking is applied. **c**, 3D views of the central cross-section. **d**, Final 3D density map of this particle, viewed from four perpendicular directions. **e**, Final 3D reconstruction superimposed with the fitted model, viewed from four perpendicular directions. **f**, FSC analyses of the final map resolution using two methods: map-map FSC, where each map is reconstructed from one half of the images (even vs. odd tilt angle indices), and map-model FSC, where the model map is generated from the fitted model. Resolution assessments are provided based on tilt-based map-map and map-model FSC analyses at thresholds of FSC=0.5 and 0.143, respectively.



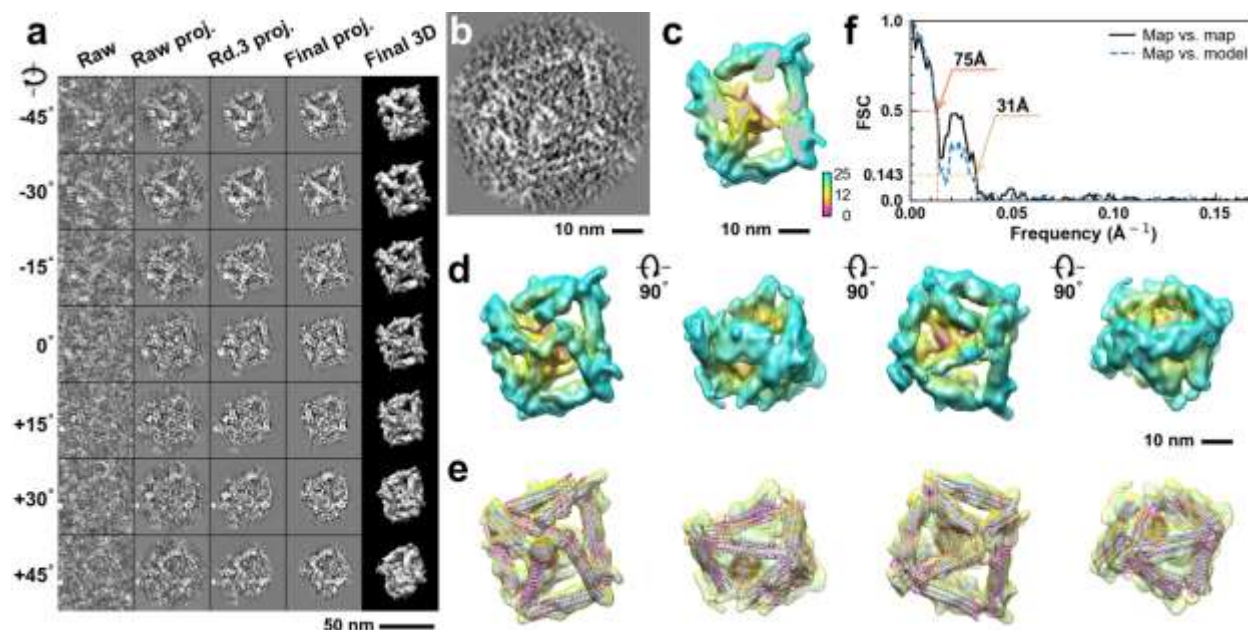

**Supplementary Fig. 94: IPET 3D reconstruction and model fitting of an individual unit-cell particle (Index: 086) within a 2D lattice with 100% ferritin loading.** **a**, Seven representative tilt images of a single unit-cell particle are shown in the first column (from left). The tilt images are aligned to a common center using IPET through iterative refinement. The projections of the raw, intermediate, and final 3D reconstruction at the corresponding angles are displayed in the subsequent four columns. **b**, A central cross-section (~23 nm thick) of the final reconstruction before masking is applied. **c**, 3D views of the central cross-section. **d**, Final 3D density map of this particle, viewed from four perpendicular directions. **e**, Final 3D reconstruction superimposed with the fitted model, viewed from four perpendicular directions. **f**, FSC analyses of the final map resolution using two methods: map-map FSC, where each map is reconstructed from one half of the images (even vs. odd tilt angle indices), and map-model FSC, where the model map is generated from the fitted model. Resolution assessments are provided based on tilt-based map-map and map-model FSC analyses at thresholds of FSC=0.5 and 0.143, respectively.

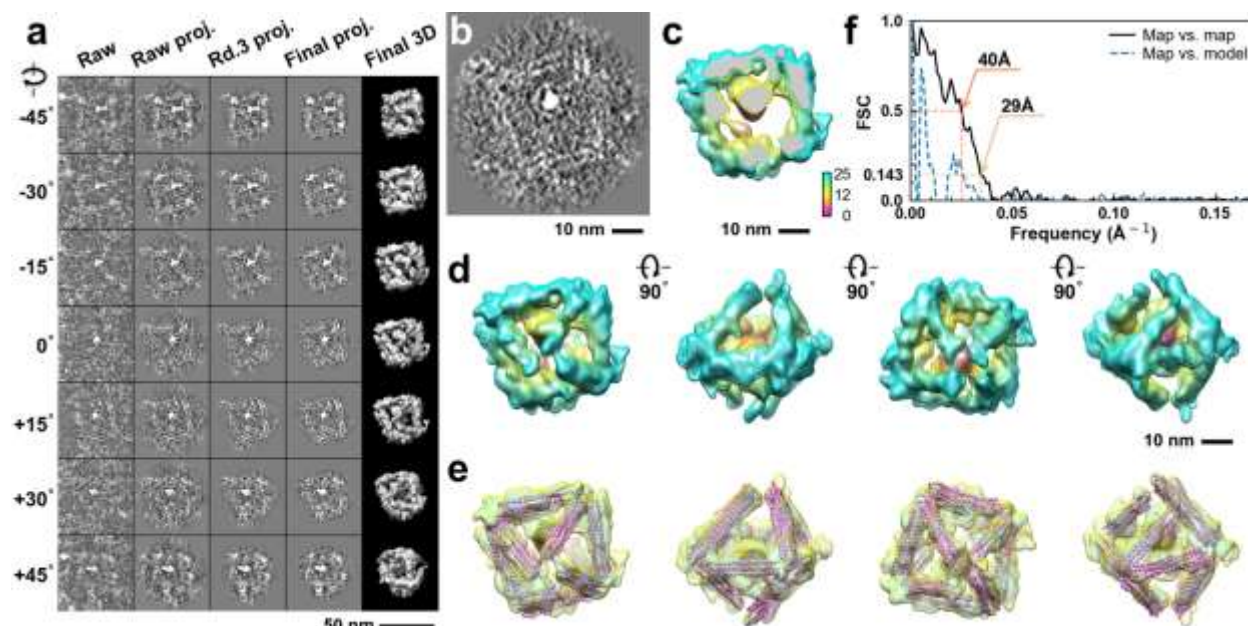

**Supplementary Fig. 95: IPET 3D reconstruction and model fitting of an individual unit-cell particle (Index: 087) within a 2D lattice with 100% ferritin loading.** **a**, Seven representative tilt images of a single unit-cell particle are shown in the first column (from left). The tilt images are aligned to a common center using IPET through iterative refinement. The projections of the raw, intermediate, and final 3D reconstruction at the corresponding angles are displayed in the subsequent four columns. **b**, A central cross-section (~23 nm thick) of the final reconstruction before masking is applied. **c**, 3D views of the central cross-section. **d**, Final 3D density map of this particle, viewed from four perpendicular directions. **e**, Final 3D reconstruction superimposed with the fitted model, viewed from four perpendicular directions. **f**, FSC analyses of the final map resolution using two methods: map-map FSC, where each map is reconstructed from one half of the images (even vs. odd tilt angle indices), and map-model FSC, where the model map is generated from the fitted model. Resolution assessments are provided based on tilt-based map-map and map-model FSC analyses at thresholds of FSC=0.5 and 0.143, respectively.

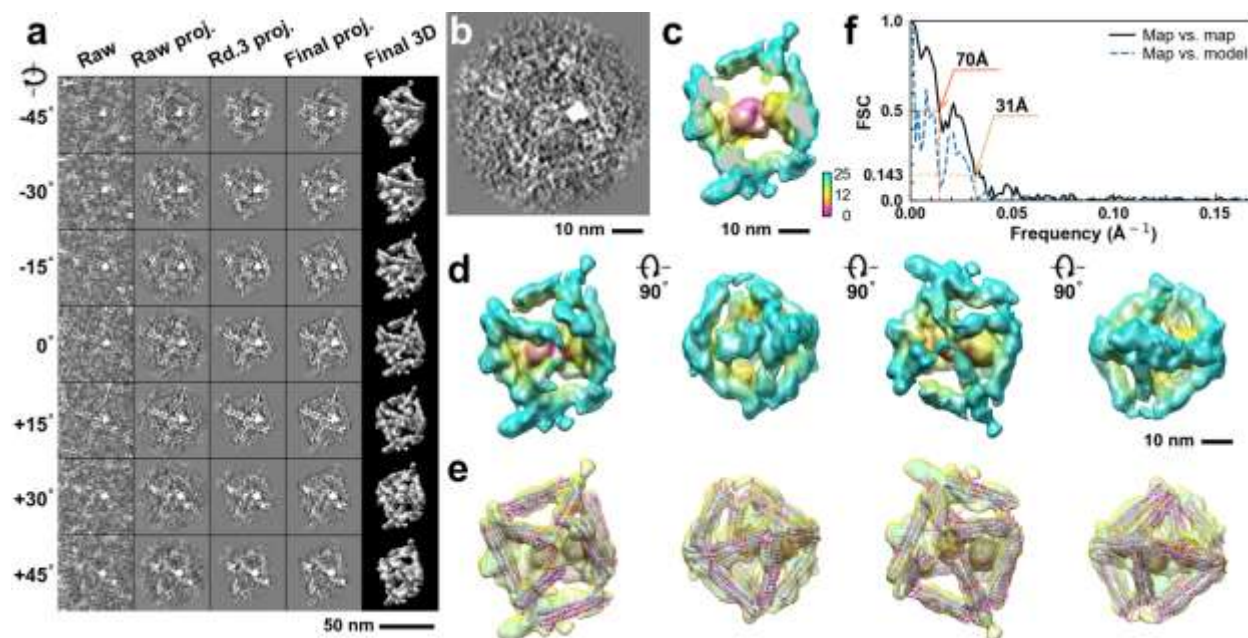

**Supplementary Fig. 96: IPET 3D reconstruction and model fitting of an individual unit-cell particle (Index: 088) within a 2D lattice with 100% ferritin loading.** **a**, Seven representative tilt images of a single unit-cell particle are shown in the first column (from left). The tilt images are aligned to a common center using IPET through iterative refinement. The projections of the raw, intermediate, and final 3D reconstruction at the corresponding angles are displayed in the subsequent four columns. **b**, A central cross-section (~23 nm thick) of the final reconstruction before masking is applied. **c**, 3D views of the central cross-section. **d**, Final 3D density map of this particle, viewed from four perpendicular directions. **e**, Final 3D reconstruction superimposed with the fitted model, viewed from four perpendicular directions. **f**, FSC analyses of the final map resolution using two methods: map-map FSC, where each map is reconstructed from one half of the images (even vs. odd tilt angle indices), and map-model FSC, where the model map is generated from the fitted model. Resolution assessments are provided based on tilt-based map-map and map-model FSC analyses at thresholds of FSC=0.5 and 0.143, respectively.

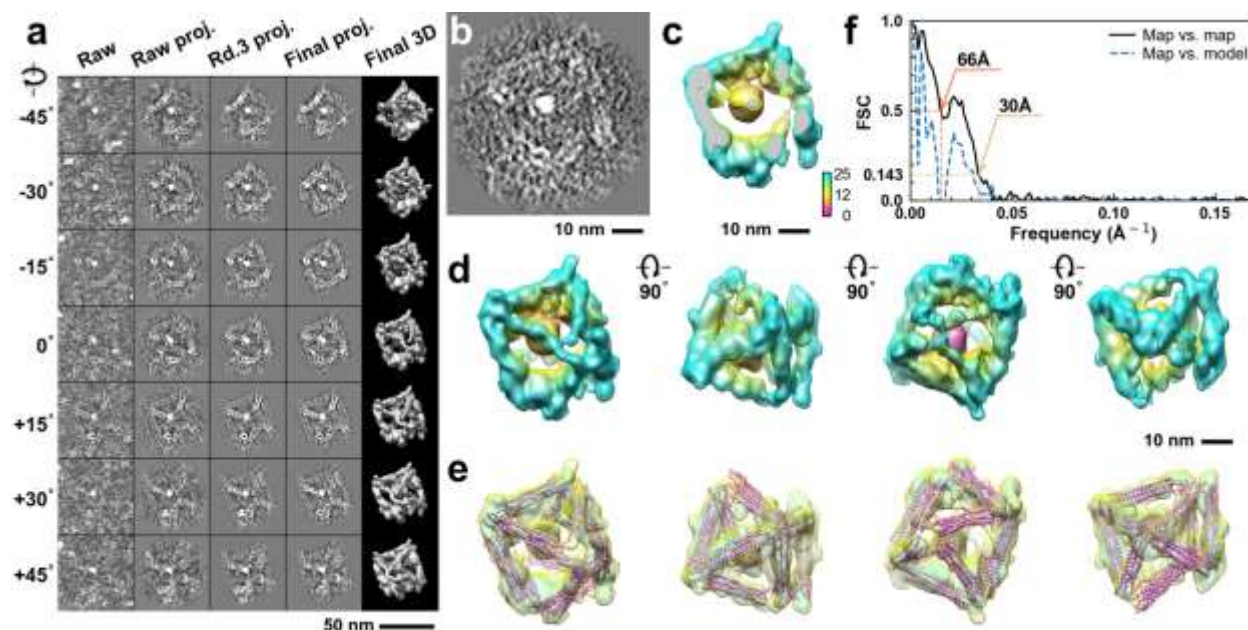

**Supplementary Fig. 97: IPET 3D reconstruction and model fitting of an individual unit-cell particle (Index: 089) within a 2D lattice with 100% ferritin loading.** **a**, Seven representative tilt images of a single unit-cell particle are shown in the first column (from left). The tilt images are aligned to a common center using IPET through iterative refinement. The projections of the raw, intermediate, and final 3D reconstruction at the corresponding angles are displayed in the subsequent four columns. **b**, A central cross-section (~23 nm thick) of the final reconstruction before masking is applied. **c**, 3D views of the central cross-section. **d**, Final 3D density map of this particle, viewed from four perpendicular directions. **e**, Final 3D reconstruction superimposed with the fitted model, viewed from four perpendicular directions. **f**, FSC analyses of the final map resolution using two methods: map-map FSC, where each map is reconstructed from one half of the images (even vs. odd tilt angle indices), and map-model FSC, where the model map is generated from the fitted model. Resolution assessments are provided based on tilt-based map-map and map-model FSC analyses at thresholds of FSC=0.5 and 0.143, respectively.



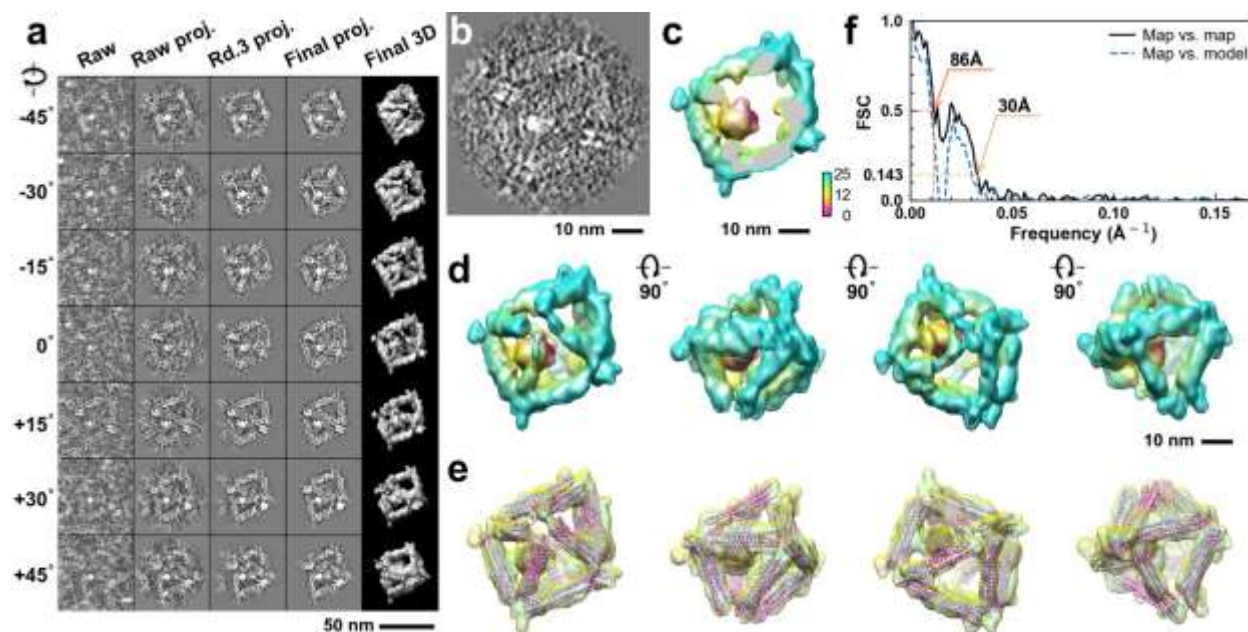

**Supplementary Fig. 98: IPET 3D reconstruction and model fitting of an individual unit-cell particle (Index: 090) within a 2D lattice with 100% ferritin loading.** **a**, Seven representative tilt images of a single unit-cell particle are shown in the first column (from left). The tilt images are aligned to a common center using IPET through iterative refinement. The projections of the raw, intermediate, and final 3D reconstruction at the corresponding angles are displayed in the subsequent four columns. **b**, A central cross-section (~23 nm thick) of the final reconstruction before masking is applied. **c**, 3D views of the central cross-section. **d**, Final 3D density map of this particle, viewed from four perpendicular directions. **e**, Final 3D reconstruction superimposed with the fitted model, viewed from four perpendicular directions. **f**, FSC analyses of the final map resolution using two methods: map-map FSC, where each map is reconstructed from one half of the images (even vs. odd tilt angle indices), and map-model FSC, where the model map is generated from the fitted model. Resolution assessments are provided based on tilt-based map-map and map-model FSC analyses at thresholds of FSC=0.5 and 0.143, respectively.

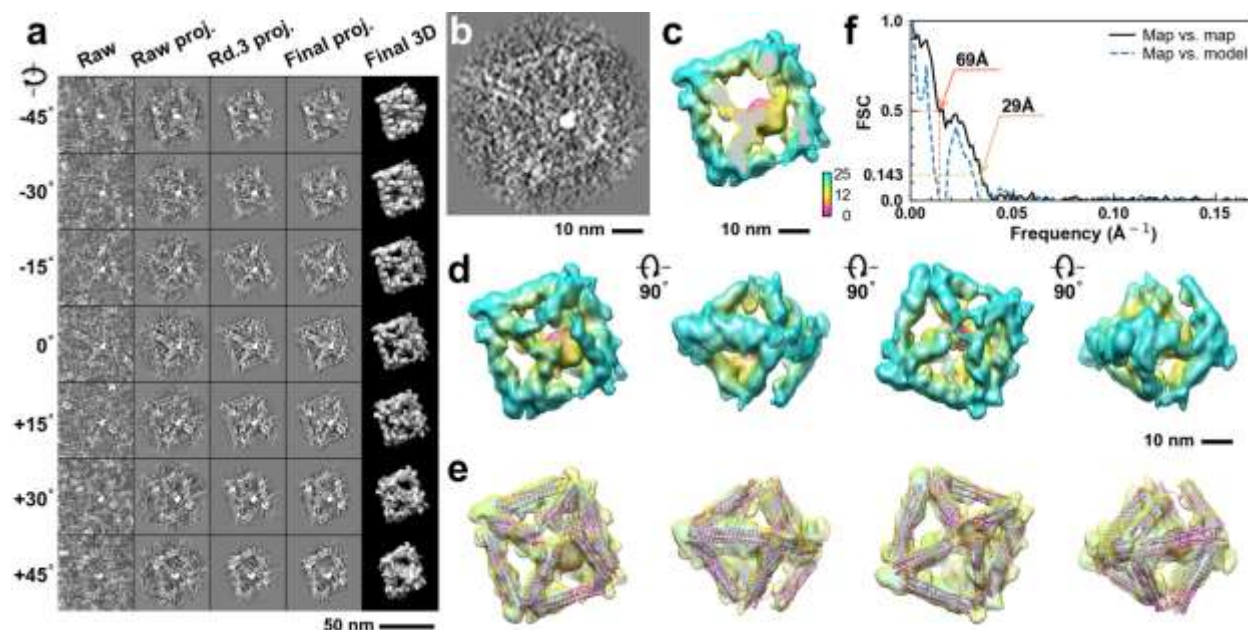

**Supplementary Fig. 99: IPET 3D reconstruction and model fitting of an individual unit-cell particle (Index: 091) within a 2D lattice with 100% ferritin loading.** **a**, Seven representative tilt images of a single unit-cell particle are shown in the first column (from left). The tilt images are aligned to a common center using IPET through iterative refinement. The projections of the raw, intermediate, and final 3D reconstruction at the corresponding angles are displayed in the subsequent four columns. **b**, A central cross-section (~23 nm thick) of the final reconstruction before masking is applied. **c**, 3D views of the central cross-section. **d**, Final 3D density map of this particle, viewed from four perpendicular directions. **e**, Final 3D reconstruction superimposed with the fitted model, viewed from four perpendicular directions. **f**, FSC analyses of the final map resolution using two methods: map-map FSC, where each map is reconstructed from one half of the images (even vs. odd tilt angle indices), and map-model FSC, where the model map is generated from the fitted model. Resolution assessments are provided based on tilt-based map-map and map-model FSC analyses at thresholds of FSC=0.5 and 0.143, respectively.

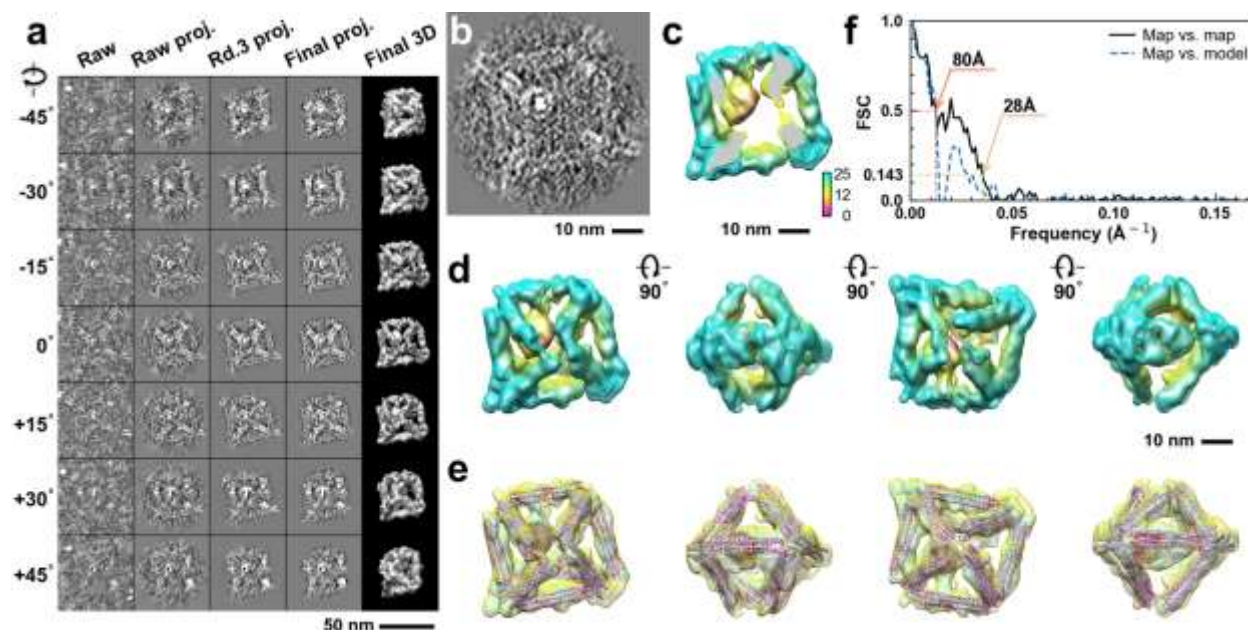

**Supplementary Fig. 100: IPET 3D reconstruction and model fitting of an individual unit-cell particle (Index: 092) within a 2D lattice with 100% ferritin loading.** **a**, Seven representative tilt images of a single unit-cell particle are shown in the first column (from left). The tilt images are aligned to a common center using IPET through iterative refinement. The projections of the raw, intermediate, and final 3D reconstruction at the corresponding angles are displayed in the subsequent four columns. **b**, A central cross-section (~23 nm thick) of the final reconstruction before masking is applied. **c**, 3D views of the central cross-section. **d**, Final 3D density map of this particle, viewed from four perpendicular directions. **e**, Final 3D reconstruction superimposed with the fitted model, viewed from four perpendicular directions. **f**, FSC analyses of the final map resolution using two methods: map-map FSC, where each map is reconstructed from one half of the images (even vs. odd tilt angle indices), and map-model FSC, where the model map is generated from the fitted model. Resolution assessments are provided based on tilt-based map-map and map-model FSC analyses at thresholds of FSC=0.5 and 0.143, respectively.

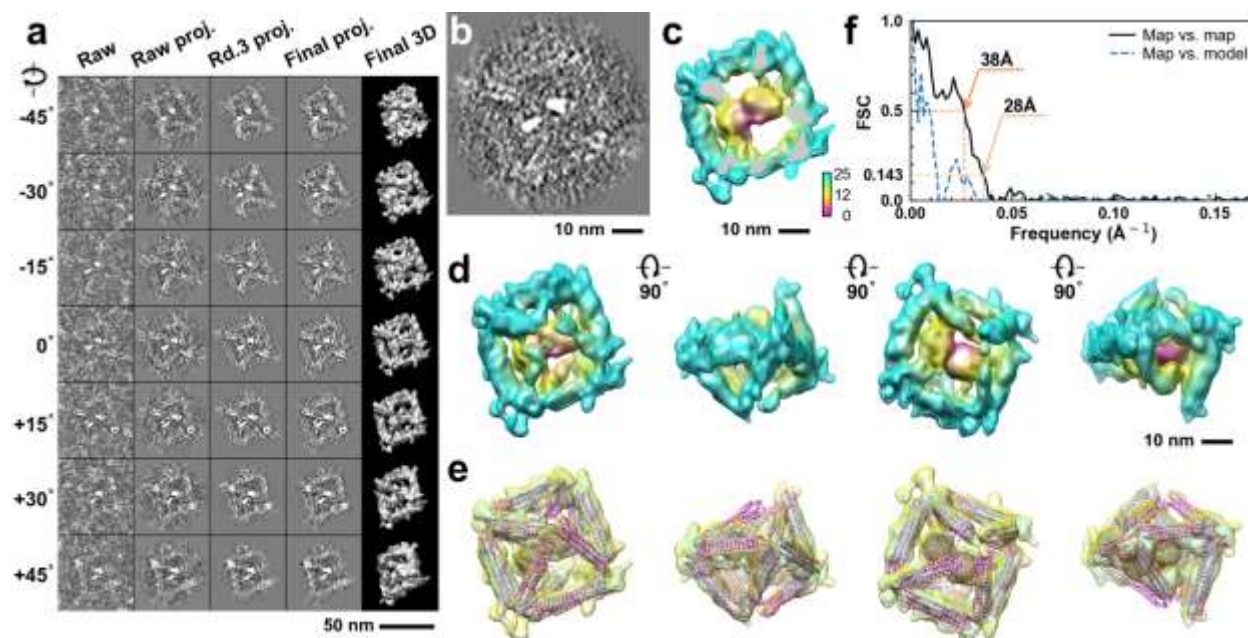

**Supplementary Fig. 101: IPET 3D reconstruction and model fitting of an individual unit-cell particle (Index: 093) within a 2D lattice with 100% ferritin loading.** **a**, Seven representative tilt images of a single unit-cell particle are shown in the first column (from left). The tilt images are aligned to a common center using IPET through iterative refinement. The projections of the raw, intermediate, and final 3D reconstruction at the corresponding angles are displayed in the subsequent four columns. **b**, A central cross-section (~23 nm thick) of the final reconstruction before masking is applied. **c**, 3D views of the central cross-section. **d**, Final 3D density map of this particle, viewed from four perpendicular directions. **e**, Final 3D reconstruction superimposed with the fitted model, viewed from four perpendicular directions. **f**, FSC analyses of the final map resolution using two methods: map-map FSC, where each map is reconstructed from one half of the images (even vs. odd tilt angle indices), and map-model FSC, where the model map is generated from the fitted model. Resolution assessments are provided based on tilt-based map-map and map-model FSC analyses at thresholds of FSC=0.5 and 0.143, respectively.



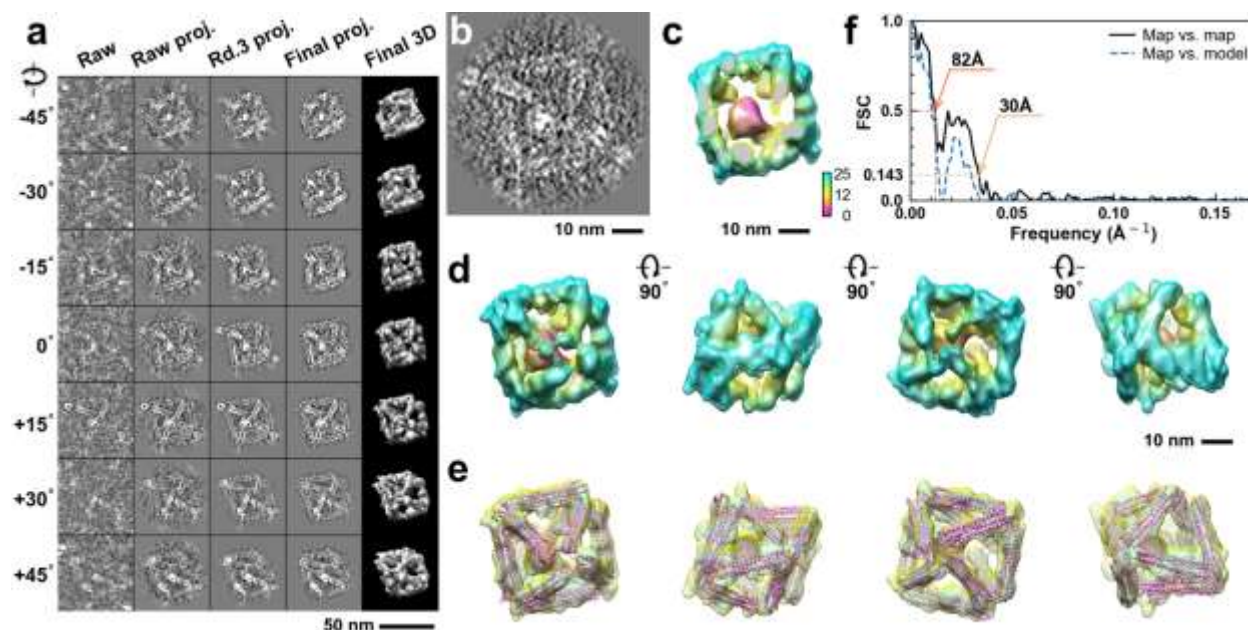

**Supplementary Fig. 102: IPET 3D reconstruction and model fitting of an individual unit-cell particle (Index: 094) within a 2D lattice with 100% ferritin loading.** **a**, Seven representative tilt images of a single unit-cell particle are shown in the first column (from left). The tilt images are aligned to a common center using IPET through iterative refinement. The projections of the raw, intermediate, and final 3D reconstruction at the corresponding angles are displayed in the subsequent four columns. **b**, A central cross-section (~23 nm thick) of the final reconstruction before masking is applied. **c**, 3D views of the central cross-section. **d**, Final 3D density map of this particle, viewed from four perpendicular directions. **e**, Final 3D reconstruction superimposed with the fitted model, viewed from four perpendicular directions. **f**, FSC analyses of the final map resolution using two methods: map-map FSC, where each map is reconstructed from one half of the images (even vs. odd tilt angle indices), and map-model FSC, where the model map is generated from the fitted model. Resolution assessments are provided based on tilt-based map-map and map-model FSC analyses at thresholds of FSC=0.5 and 0.143, respectively.

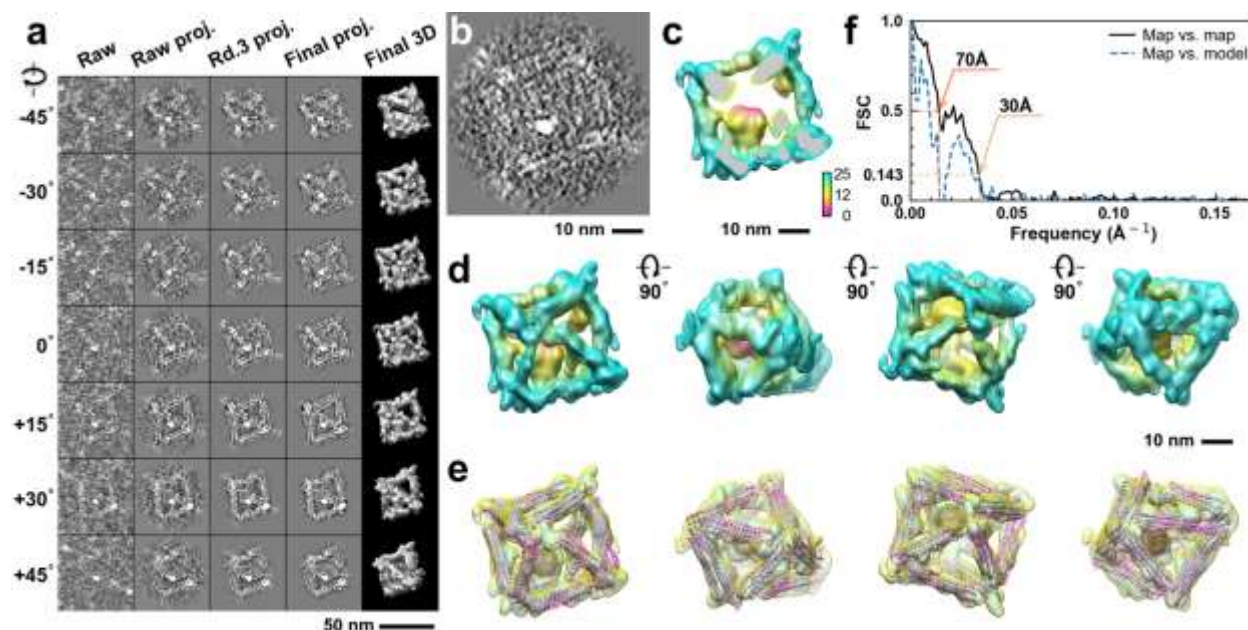

**Supplementary Fig. 103: IPET 3D reconstruction and model fitting of an individual unit-cell particle (Index: 095) within a 2D lattice with 100% ferritin loading.** **a**, Seven representative tilt images of a single unit-cell particle are shown in the first column (from left). The tilt images are aligned to a common center using IPET through iterative refinement. The projections of the raw, intermediate, and final 3D reconstruction at the corresponding angles are displayed in the subsequent four columns. **b**, A central cross-section (~23 nm thick) of the final reconstruction before masking is applied. **c**, 3D views of the central cross-section. **d**, Final 3D density map of this particle, viewed from four perpendicular directions. **e**, Final 3D reconstruction superimposed with the fitted model, viewed from four perpendicular directions. **f**, FSC analyses of the final map resolution using two methods: map-map FSC, where each map is reconstructed from one half of the images (even vs. odd tilt angle indices), and map-model FSC, where the model map is generated from the fitted model. Resolution assessments are provided based on tilt-based map-map and map-model FSC analyses at thresholds of FSC=0.5 and 0.143, respectively.

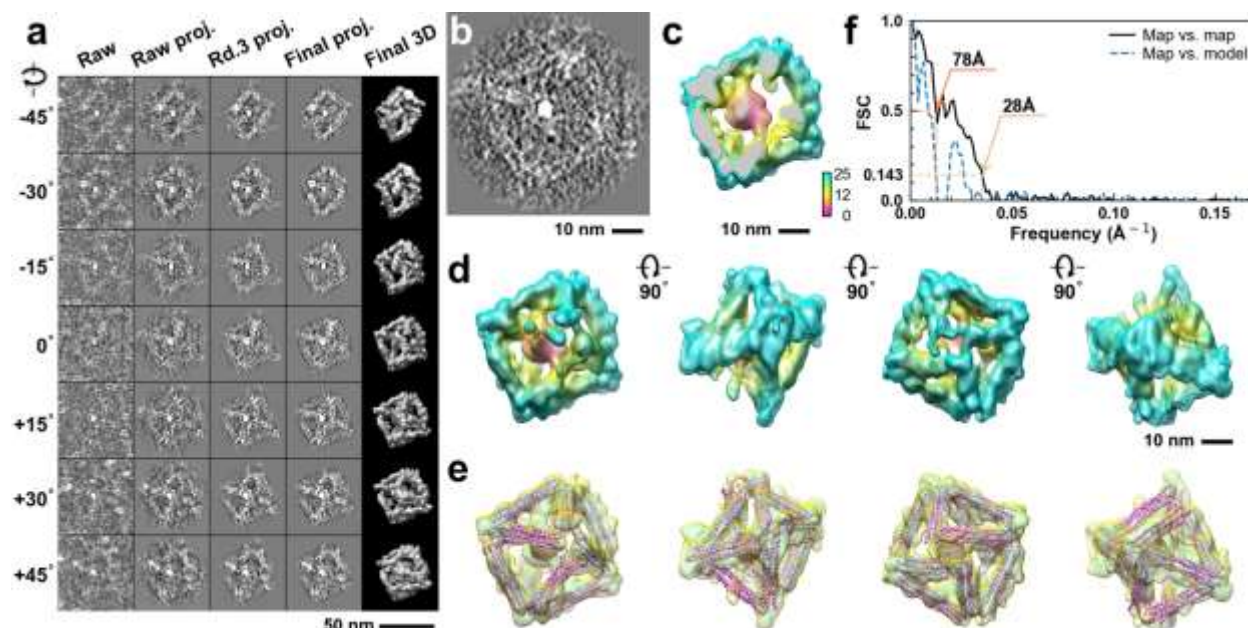

**Supplementary Fig. 104: IPET 3D reconstruction and model fitting of an individual unit-cell particle (Index: 096) within a 2D lattice with 100% ferritin loading.** **a**, Seven representative tilt images of a single unit-cell particle are shown in the first column (from left). The tilt images are aligned to a common center using IPET through iterative refinement. The projections of the raw, intermediate, and final 3D reconstruction at the corresponding angles are displayed in the subsequent four columns. **b**, A central cross-section (~23 nm thick) of the final reconstruction before masking is applied. **c**, 3D views of the central cross-section. **d**, Final 3D density map of this particle, viewed from four perpendicular directions. **e**, Final 3D reconstruction superimposed with the fitted model, viewed from four perpendicular directions. **f**, FSC analyses of the final map resolution using two methods: map-map FSC, where each map is reconstructed from one half of the images (even vs. odd tilt angle indices), and map-model FSC, where the model map is generated from the fitted model. Resolution assessments are provided based on tilt-based map-map and map-model FSC analyses at thresholds of FSC=0.5 and 0.143, respectively.

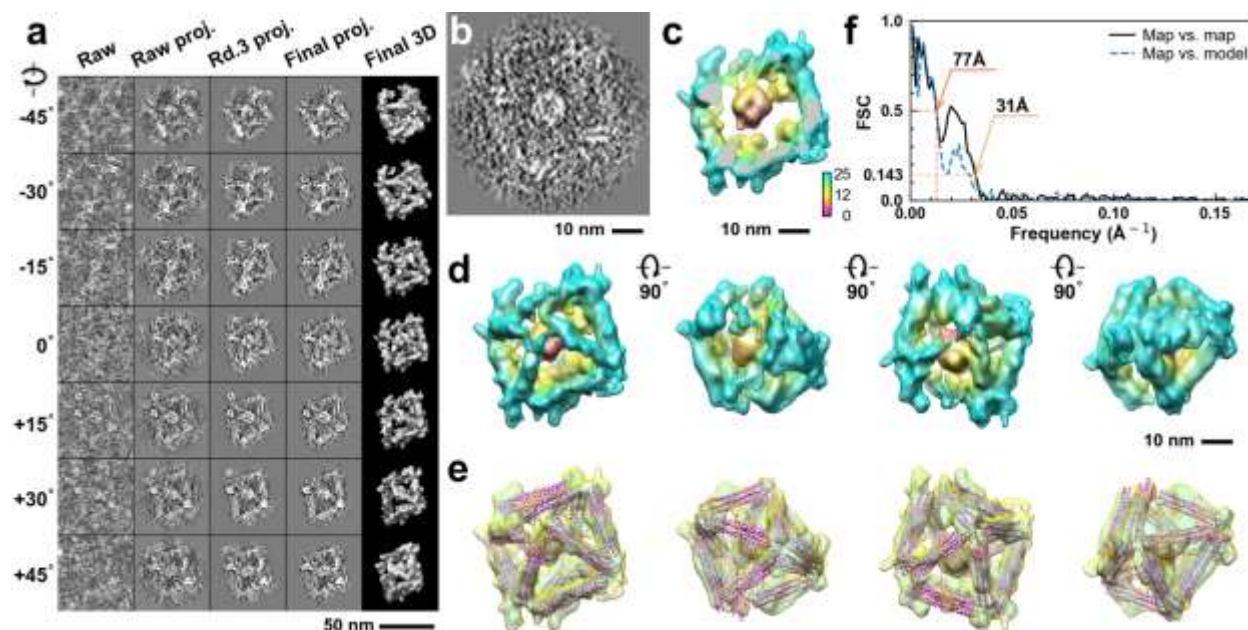

**Supplementary Fig. 105: IPET 3D reconstruction and model fitting of an individual unit-cell particle (Index: 097) within a 2D lattice with 100% ferritin loading.** **a**, Seven representative tilt images of a single unit-cell particle are shown in the first column (from left). The tilt images are aligned to a common center using IPET through iterative refinement. The projections of the raw, intermediate, and final 3D reconstruction at the corresponding angles are displayed in the subsequent four columns. **b**, A central cross-section (~23 nm thick) of the final reconstruction before masking is applied. **c**, 3D views of the central cross-section. **d**, Final 3D density map of this particle, viewed from four perpendicular directions. **e**, Final 3D reconstruction superimposed with the fitted model, viewed from four perpendicular directions. **f**, FSC analyses of the final map resolution using two methods: map-map FSC, where each map is reconstructed from one half of the images (even vs. odd tilt angle indices), and map-model FSC, where the model map is generated from the fitted model. Resolution assessments are provided based on tilt-based map-map and map-model FSC analyses at thresholds of FSC=0.5 and 0.143, respectively.



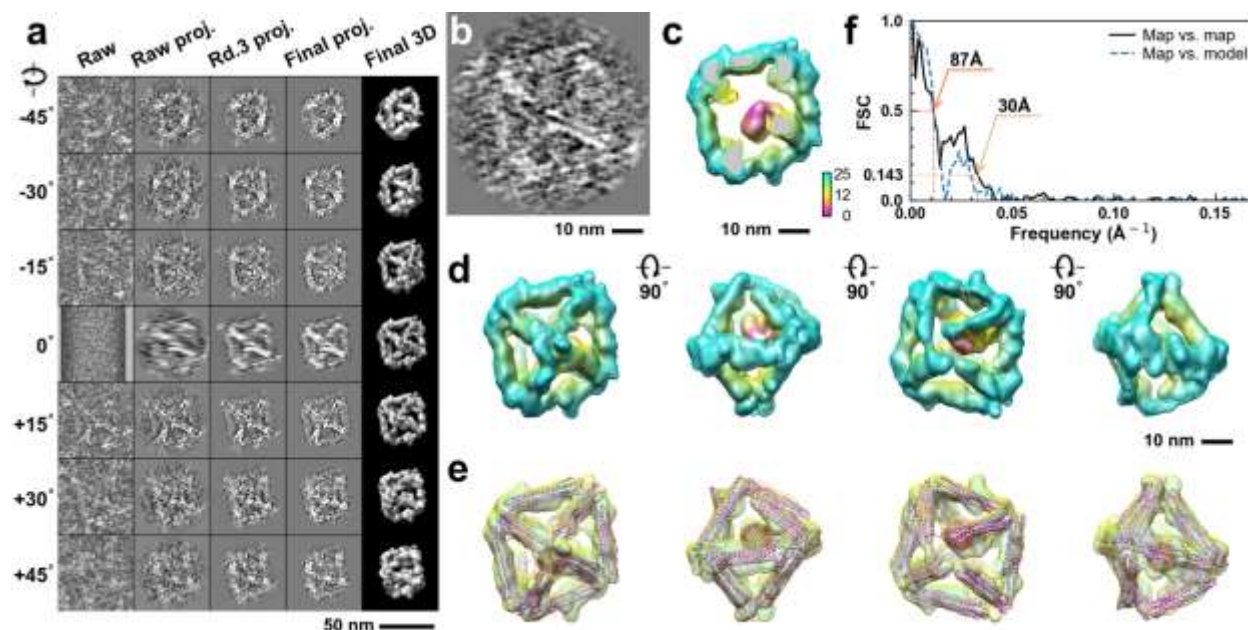

**Supplementary Fig. 106: IPET 3D reconstruction and model fitting of an individual unit-cell particle (Index: 098) within a 2D lattice with 100% ferritin loading.** **a**, Seven representative tilt images of a single unit-cell particle are shown in the first column (from left). The tilt images are aligned to a common center using IPET through iterative refinement. The projections of the raw, intermediate, and final 3D reconstruction at the corresponding angles are displayed in the subsequent four columns. **b**, A central cross-section (~23 nm thick) of the final reconstruction before masking is applied. **c**, 3D views of the central cross-section. **d**, Final 3D density map of this particle, viewed from four perpendicular directions. **e**, Final 3D reconstruction superimposed with the fitted model, viewed from four perpendicular directions. **f**, FSC analyses of the final map resolution using two methods: map-map FSC, where each map is reconstructed from one half of the images (even vs. odd tilt angle indices), and map-model FSC, where the model map is generated from the fitted model. Resolution assessments are provided based on tilt-based map-map and map-model FSC analyses at thresholds of FSC=0.5 and 0.143, respectively.

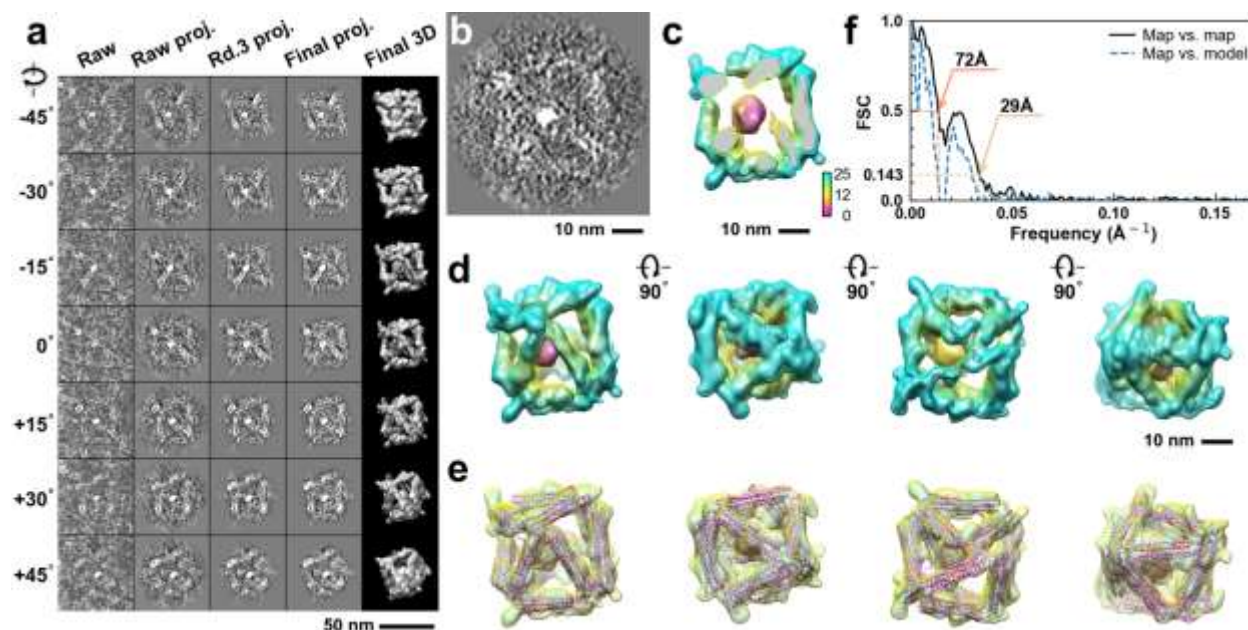

**Supplementary Fig. 107: IPET 3D reconstruction and model fitting of an individual unit-cell particle (Index: 099) within a 2D lattice with 100% ferritin loading.** **a**, Seven representative tilt images of a single unit-cell particle are shown in the first column (from left). The tilt images are aligned to a common center using IPET through iterative refinement. The projections of the raw, intermediate, and final 3D reconstruction at the corresponding angles are displayed in the subsequent four columns. **b**, A central cross-section (~23 nm thick) of the final reconstruction before masking is applied. **c**, 3D views of the central cross-section. **d**, Final 3D density map of this particle, viewed from four perpendicular directions. **e**, Final 3D reconstruction superimposed with the fitted model, viewed from four perpendicular directions. **f**, FSC analyses of the final map resolution using two methods: map-map FSC, where each map is reconstructed from one half of the images (even vs. odd tilt angle indices), and map-model FSC, where the model map is generated from the fitted model. Resolution assessments are provided based on tilt-based map-map and map-model FSC analyses at thresholds of FSC=0.5 and 0.143, respectively.

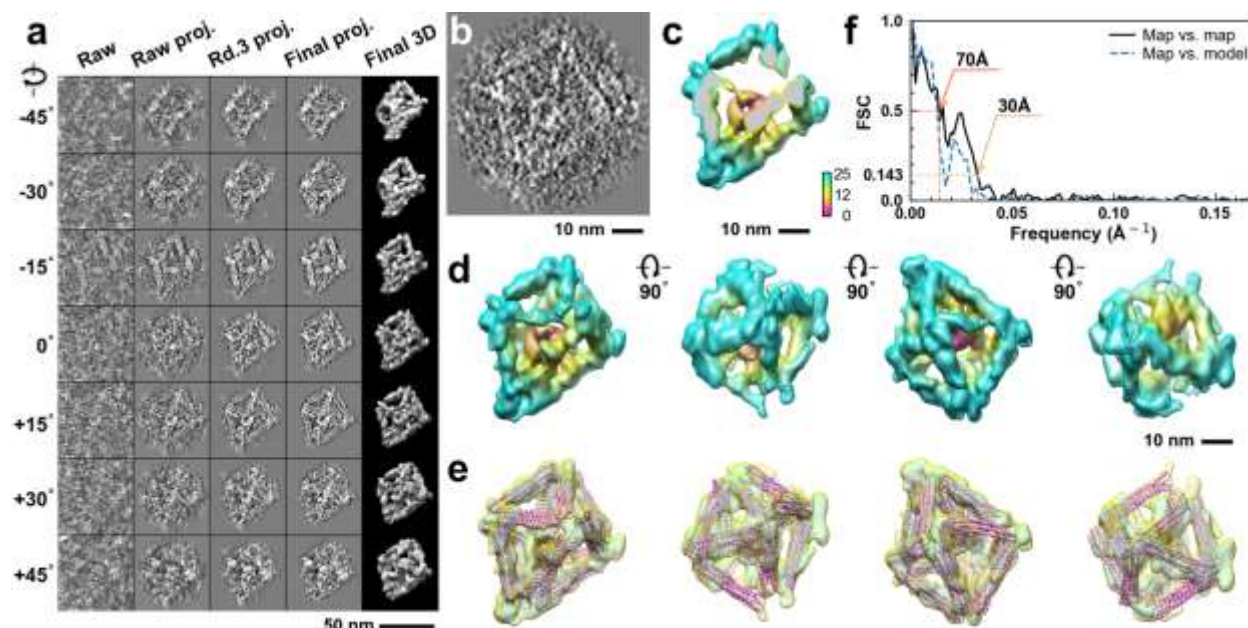

**Supplementary Fig. 108: IPET 3D reconstruction and model fitting of an individual unit-cell particle (Index: 100) within a 2D lattice with 100% ferritin loading.** **a**, Seven representative tilt images of a single unit-cell particle are shown in the first column (from left). The tilt images are aligned to a common center using IPET through iterative refinement. The projections of the raw, intermediate, and final 3D reconstruction at the corresponding angles are displayed in the subsequent four columns. **b**, A central cross-section (~23 nm thick) of the final reconstruction before masking is applied. **c**, 3D views of the central cross-section. **d**, Final 3D density map of this particle, viewed from four perpendicular directions. **e**, Final 3D reconstruction superimposed with the fitted model, viewed from four perpendicular directions. **f**, FSC analyses of the final map resolution using two methods: map-map FSC, where each map is reconstructed from one half of the images (even vs. odd tilt angle indices), and map-model FSC, where the model map is generated from the fitted model. Resolution assessments are provided based on tilt-based map-map and map-model FSC analyses at thresholds of FSC=0.5 and 0.143, respectively.

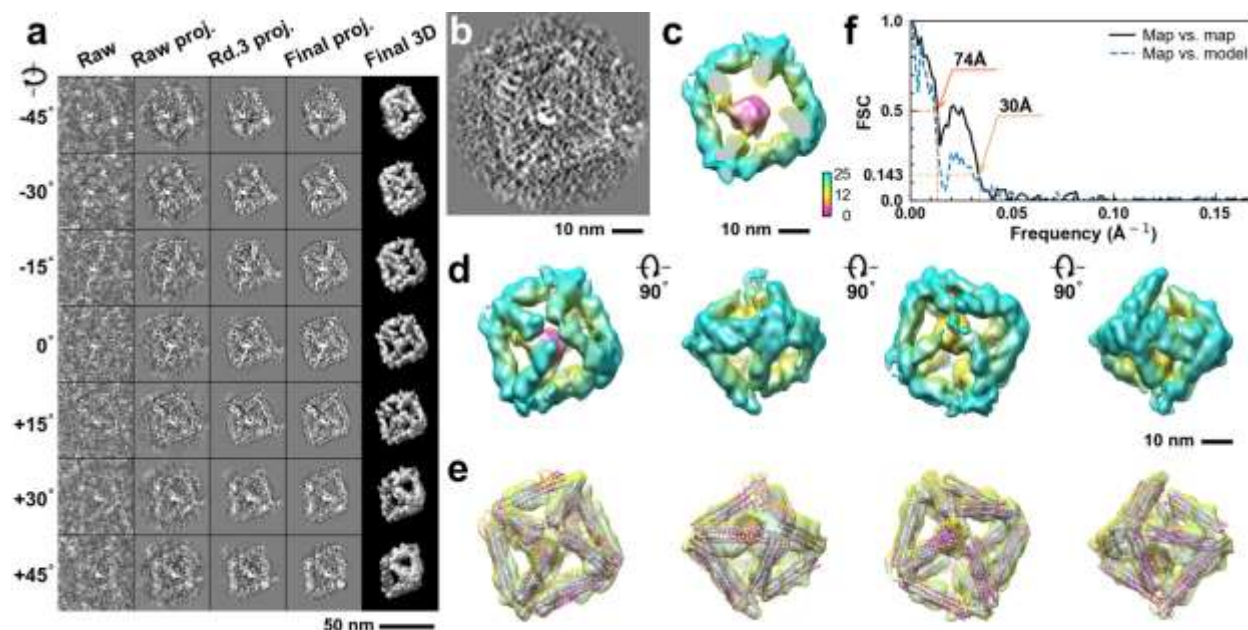

**Supplementary Fig. 109: IPET 3D reconstruction and model fitting of an individual unit-cell particle (Index: 101) within a 2D lattice with 100% ferritin loading.** **a**, Seven representative tilt images of a single unit-cell particle are shown in the first column (from left). The tilt images are aligned to a common center using IPET through iterative refinement. The projections of the raw, intermediate, and final 3D reconstruction at the corresponding angles are displayed in the subsequent four columns. **b**, A central cross-section (~23 nm thick) of the final reconstruction before masking is applied. **c**, 3D views of the central cross-section. **d**, Final 3D density map of this particle, viewed from four perpendicular directions. **e**, Final 3D reconstruction superimposed with the fitted model, viewed from four perpendicular directions. **f**, FSC analyses of the final map resolution using two methods: map-map FSC, where each map is reconstructed from one half of the images (even vs. odd tilt angle indices), and map-model FSC, where the model map is generated from the fitted model. Resolution assessments are provided based on tilt-based map-map and map-model FSC analyses at thresholds of FSC=0.5 and 0.143, respectively.



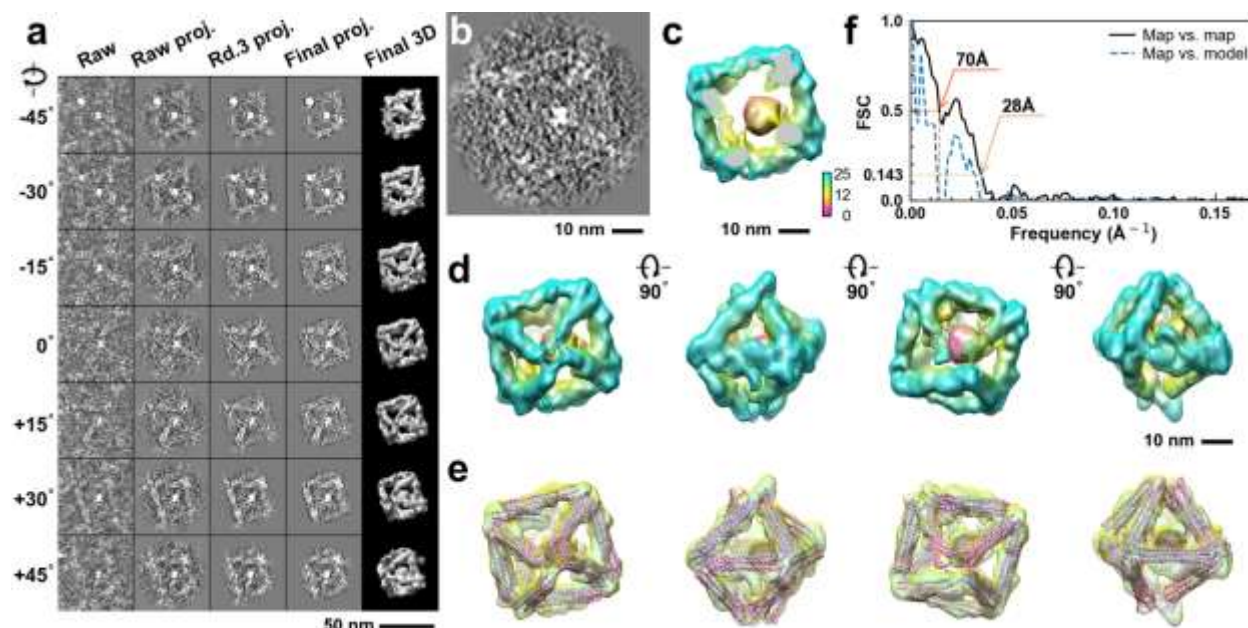

**Supplementary Fig. 110: IPET 3D reconstruction and model fitting of an individual unit-cell particle (Index: 102) within a 2D lattice with 100% ferritin loading.** **a**, Seven representative tilt images of a single unit-cell particle are shown in the first column (from left). The tilt images are aligned to a common center using IPET through iterative refinement. The projections of the raw, intermediate, and final 3D reconstruction at the corresponding angles are displayed in the subsequent four columns. **b**, A central cross-section (~23 nm thick) of the final reconstruction before masking is applied. **c**, 3D views of the central cross-section. **d**, Final 3D density map of this particle, viewed from four perpendicular directions. **e**, Final 3D reconstruction superimposed with the fitted model, viewed from four perpendicular directions. **f**, FSC analyses of the final map resolution using two methods: map-map FSC, where each map is reconstructed from one half of the images (even vs. odd tilt angle indices), and map-model FSC, where the model map is generated from the fitted model. Resolution assessments are provided based on tilt-based map-map and map-model FSC analyses at thresholds of FSC=0.5 and 0.143, respectively.

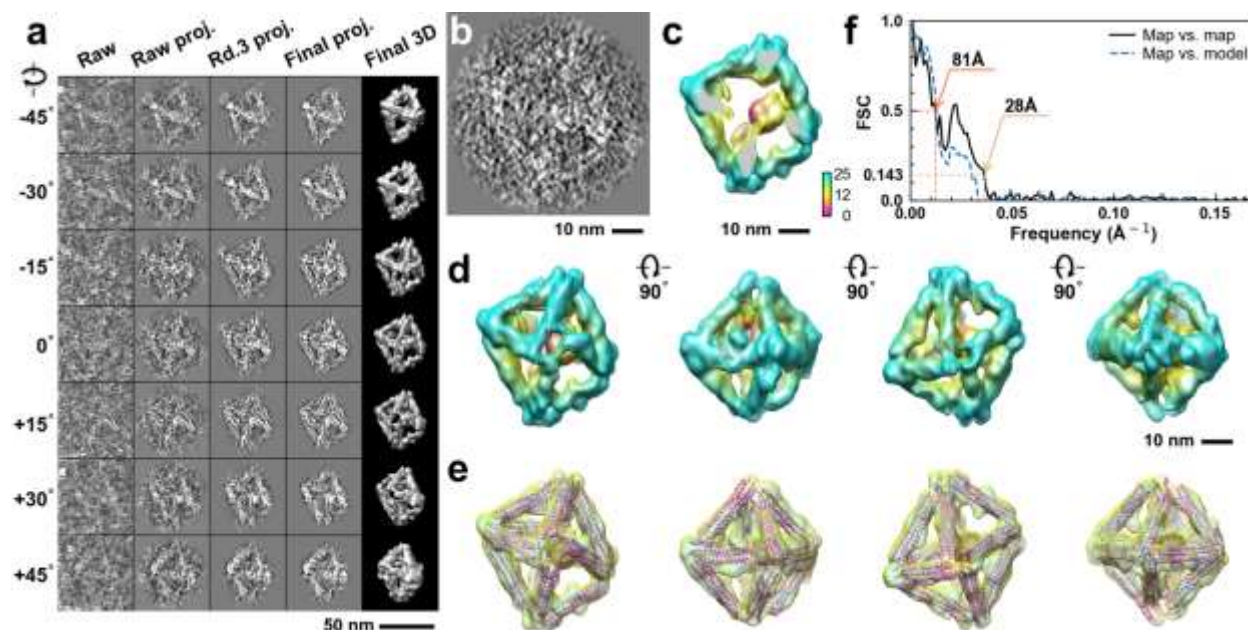

**Supplementary Fig. 111: IPET 3D reconstruction and model fitting of an individual unit-cell particle (Index: 103) within a 2D lattice with 100% ferritin loading.** **a**, Seven representative tilt images of a single unit-cell particle are shown in the first column (from left). The tilt images are aligned to a common center using IPET through iterative refinement. The projections of the raw, intermediate, and final 3D reconstruction at the corresponding angles are displayed in the subsequent four columns. **b**, A central cross-section (~23 nm thick) of the final reconstruction before masking is applied. **c**, 3D views of the central cross-section. **d**, Final 3D density map of this particle, viewed from four perpendicular directions. **e**, Final 3D reconstruction superimposed with the fitted model, viewed from four perpendicular directions. **f**, FSC analyses of the final map resolution using two methods: map-map FSC, where each map is reconstructed from one half of the images (even vs. odd tilt angle indices), and map-model FSC, where the model map is generated from the fitted model. Resolution assessments are provided based on tilt-based map-map and map-model FSC analyses at thresholds of FSC=0.5 and 0.143, respectively.

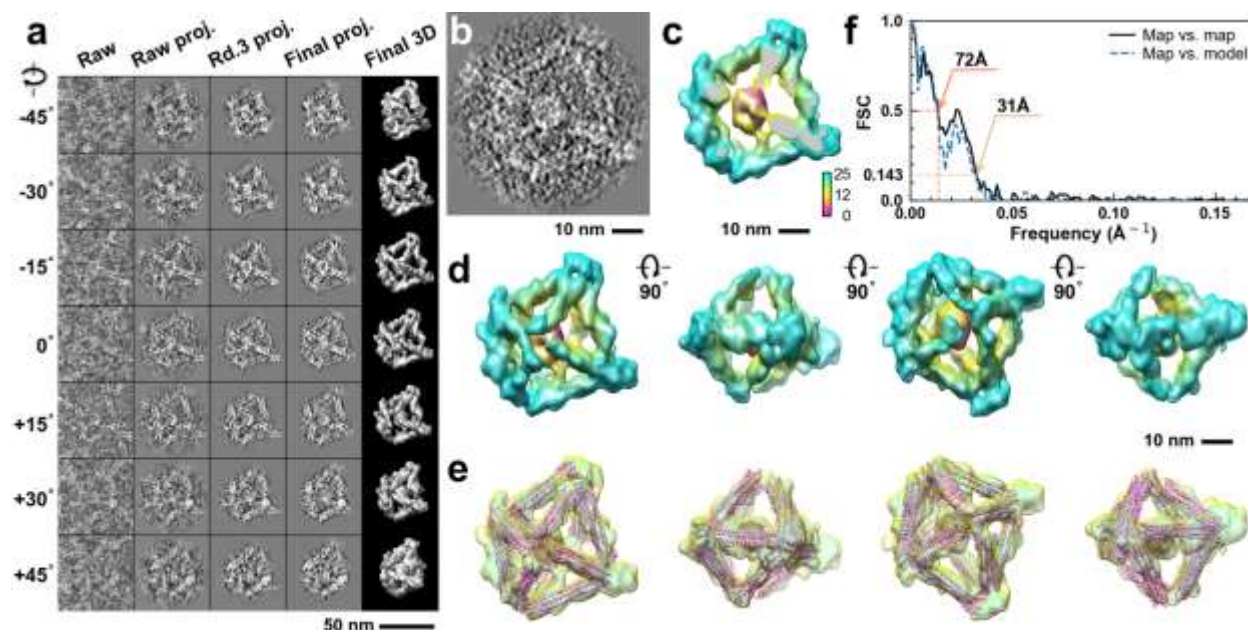

**Supplementary Fig. 112: IPET 3D reconstruction and model fitting of an individual unit-cell particle (Index: 104) within a 2D lattice with 100% ferritin loading.** **a**, Seven representative tilt images of a single unit-cell particle are shown in the first column (from left). The tilt images are aligned to a common center using IPET through iterative refinement. The projections of the raw, intermediate, and final 3D reconstruction at the corresponding angles are displayed in the subsequent four columns. **b**, A central cross-section (~23 nm thick) of the final reconstruction before masking is applied. **c**, 3D views of the central cross-section. **d**, Final 3D density map of this particle, viewed from four perpendicular directions. **e**, Final 3D reconstruction superimposed with the fitted model, viewed from four perpendicular directions. **f**, FSC analyses of the final map resolution using two methods: map-map FSC, where each map is reconstructed from one half of the images (even vs. odd tilt angle indices), and map-model FSC, where the model map is generated from the fitted model. Resolution assessments are provided based on tilt-based map-map and map-model FSC analyses at thresholds of FSC=0.5 and 0.143, respectively.

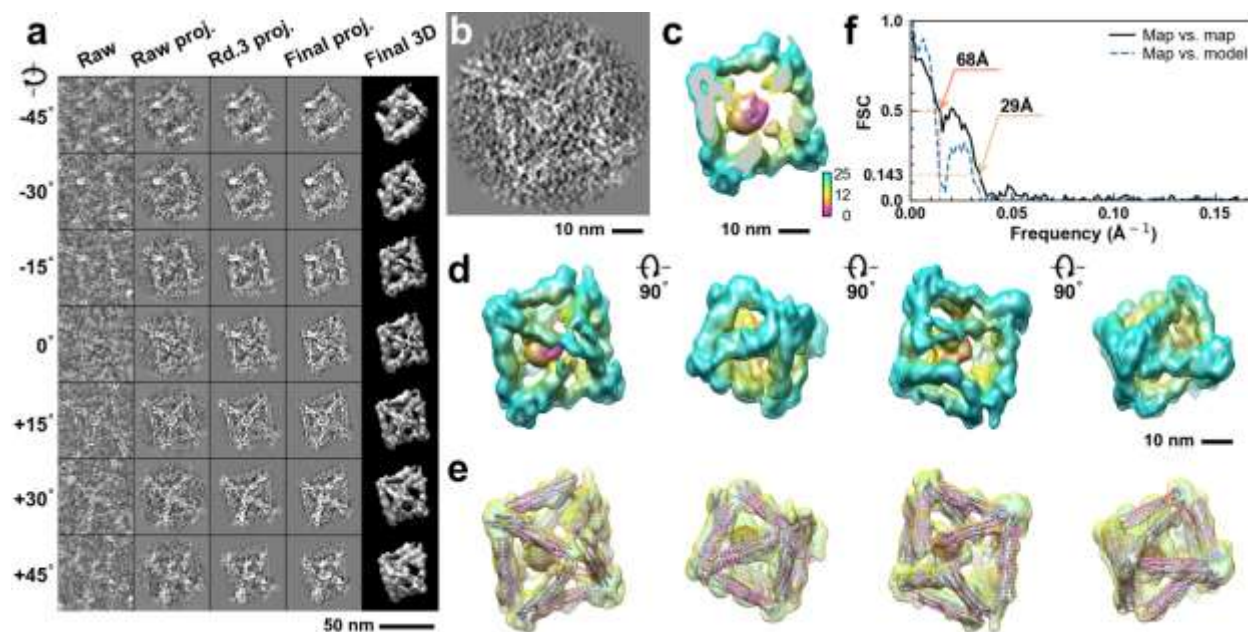

**Supplementary Fig. 113: IPET 3D reconstruction and model fitting of an individual unit-cell particle (Index: 105) within a 2D lattice with 100% ferritin loading.** **a**, Seven representative tilt images of a single unit-cell particle are shown in the first column (from left). The tilt images are aligned to a common center using IPET through iterative refinement. The projections of the raw, intermediate, and final 3D reconstruction at the corresponding angles are displayed in the subsequent four columns. **b**, A central cross-section (~23 nm thick) of the final reconstruction before masking is applied. **c**, 3D views of the central cross-section. **d**, Final 3D density map of this particle, viewed from four perpendicular directions. **e**, Final 3D reconstruction superimposed with the fitted model, viewed from four perpendicular directions. **f**, FSC analyses of the final map resolution using two methods: map-map FSC, where each map is reconstructed from one half of the images (even vs. odd tilt angle indices), and map-model FSC, where the model map is generated from the fitted model. Resolution assessments are provided based on tilt-based map-map and map-model FSC analyses at thresholds of FSC=0.5 and 0.143, respectively.



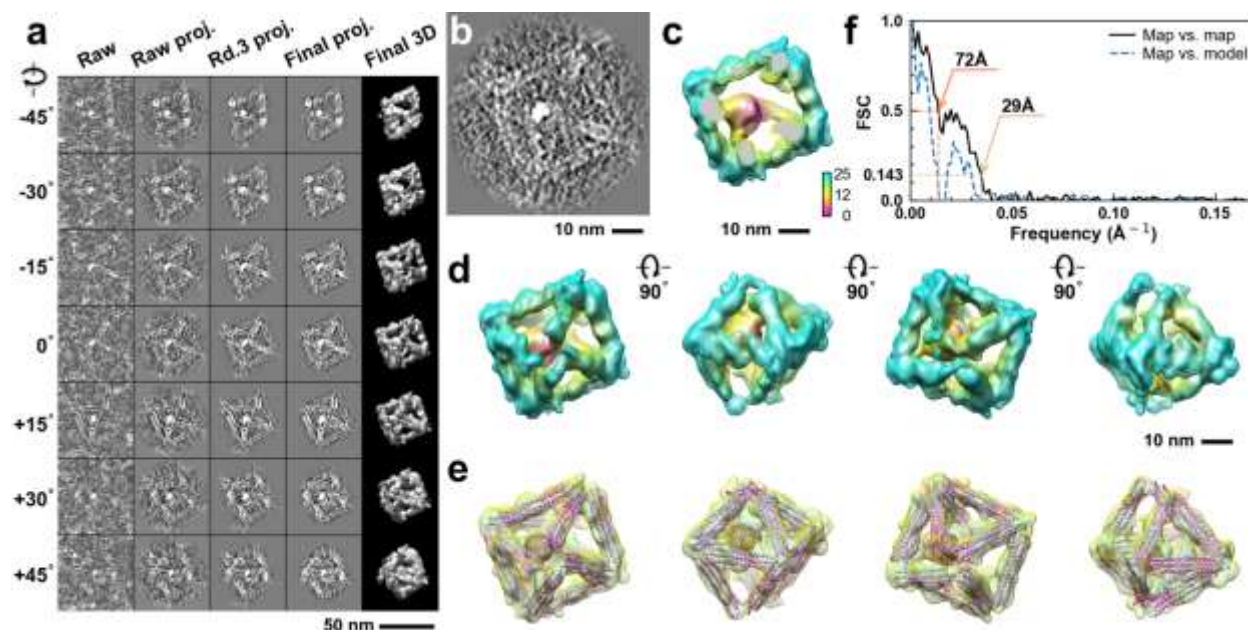

**Supplementary Fig. 114: IPET 3D reconstruction and model fitting of an individual unit-cell particle (Index: 106) within a 2D lattice with 100% ferritin loading.** **a**, Seven representative tilt images of a single unit-cell particle are shown in the first column (from left). The tilt images are aligned to a common center using IPET through iterative refinement. The projections of the raw, intermediate, and final 3D reconstruction at the corresponding angles are displayed in the subsequent four columns. **b**, A central cross-section (~23 nm thick) of the final reconstruction before masking is applied. **c**, 3D views of the central cross-section. **d**, Final 3D density map of this particle, viewed from four perpendicular directions. **e**, Final 3D reconstruction superimposed with the fitted model, viewed from four perpendicular directions. **f**, FSC analyses of the final map resolution using two methods: map-map FSC, where each map is reconstructed from one half of the images (even vs. odd tilt angle indices), and map-model FSC, where the model map is generated from the fitted model. Resolution assessments are provided based on tilt-based map-map and map-model FSC analyses at thresholds of FSC=0.5 and 0.143, respectively.

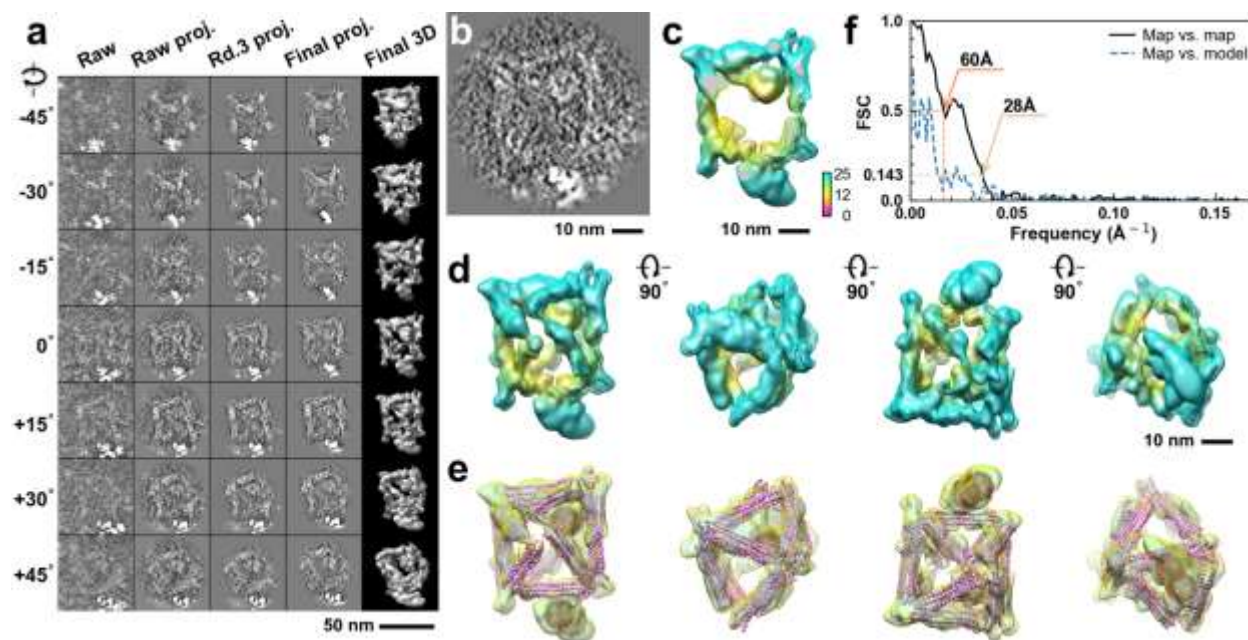

**Supplementary Fig. 115: IPET 3D reconstruction and model fitting of an individual unit-cell particle (Index: 107) within a 2D lattice with 100% ferritin loading.** **a**, Seven representative tilt images of a single unit-cell particle are shown in the first column (from left). The tilt images are aligned to a common center using IPET through iterative refinement. The projections of the raw, intermediate, and final 3D reconstruction at the corresponding angles are displayed in the subsequent four columns. **b**, A central cross-section (~23 nm thick) of the final reconstruction before masking is applied. **c**, 3D views of the central cross-section. **d**, Final 3D density map of this particle, viewed from four perpendicular directions. **e**, Final 3D reconstruction superimposed with the fitted model, viewed from four perpendicular directions. **f**, FSC analyses of the final map resolution using two methods: map-map FSC, where each map is reconstructed from one half of the images (even vs. odd tilt angle indices), and map-model FSC, where the model map is generated from the fitted model. Resolution assessments are provided based on tilt-based map-map and map-model FSC analyses at thresholds of FSC=0.5 and 0.143, respectively.

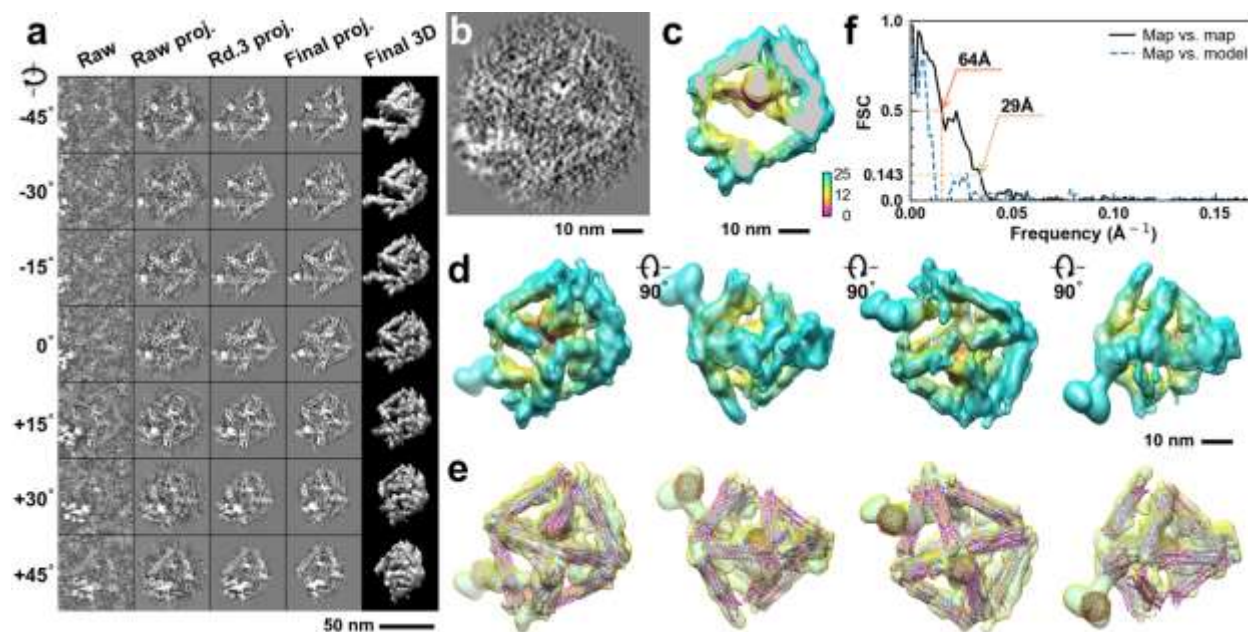

**Supplementary Fig. 116: IPET 3D reconstruction and model fitting of an individual unit-cell particle (Index: 108) within a 2D lattice with 100% ferritin loading.** **a**, Seven representative tilt images of a single unit-cell particle are shown in the first column (from left). The tilt images are aligned to a common center using IPET through iterative refinement. The projections of the raw, intermediate, and final 3D reconstruction at the corresponding angles are displayed in the subsequent four columns. **b**, A central cross-section (~23 nm thick) of the final reconstruction before masking is applied. **c**, 3D views of the central cross-section. **d**, Final 3D density map of this particle, viewed from four perpendicular directions. **e**, Final 3D reconstruction superimposed with the fitted model, viewed from four perpendicular directions. **f**, FSC analyses of the final map resolution using two methods: map-map FSC, where each map is reconstructed from one half of the images (even vs. odd tilt angle indices), and map-model FSC, where the model map is generated from the fitted model. Resolution assessments are provided based on tilt-based map-map and map-model FSC analyses at thresholds of FSC=0.5 and 0.143, respectively.

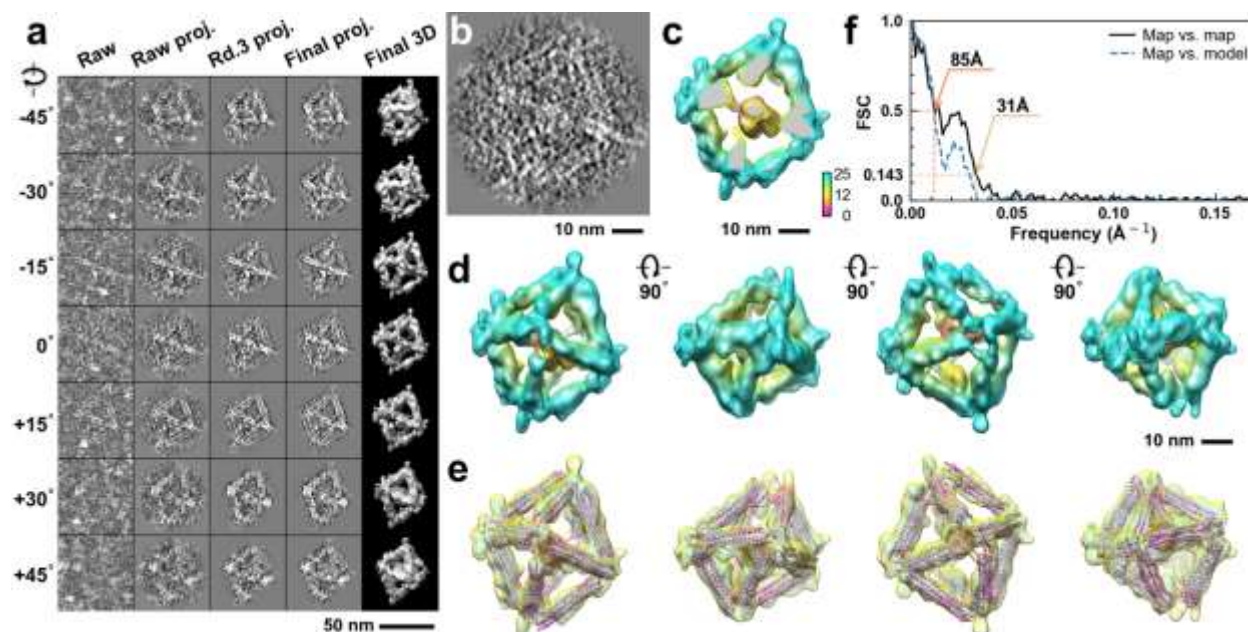

**Supplementary Fig. 117: IPET 3D reconstruction and model fitting of an individual unit-cell particle (Index: 109) within a 2D lattice with 100% ferritin loading.** **a**, Seven representative tilt images of a single unit-cell particle are shown in the first column (from left). The tilt images are aligned to a common center using IPET through iterative refinement. The projections of the raw, intermediate, and final 3D reconstruction at the corresponding angles are displayed in the subsequent four columns. **b**, A central cross-section (~23 nm thick) of the final reconstruction before masking is applied. **c**, 3D views of the central cross-section. **d**, Final 3D density map of this particle, viewed from four perpendicular directions. **e**, Final 3D reconstruction superimposed with the fitted model, viewed from four perpendicular directions. **f**, FSC analyses of the final map resolution using two methods: map-map FSC, where each map is reconstructed from one half of the images (even vs. odd tilt angle indices), and map-model FSC, where the model map is generated from the fitted model. Resolution assessments are provided based on tilt-based map-map and map-model FSC analyses at thresholds of FSC=0.5 and 0.143, respectively.



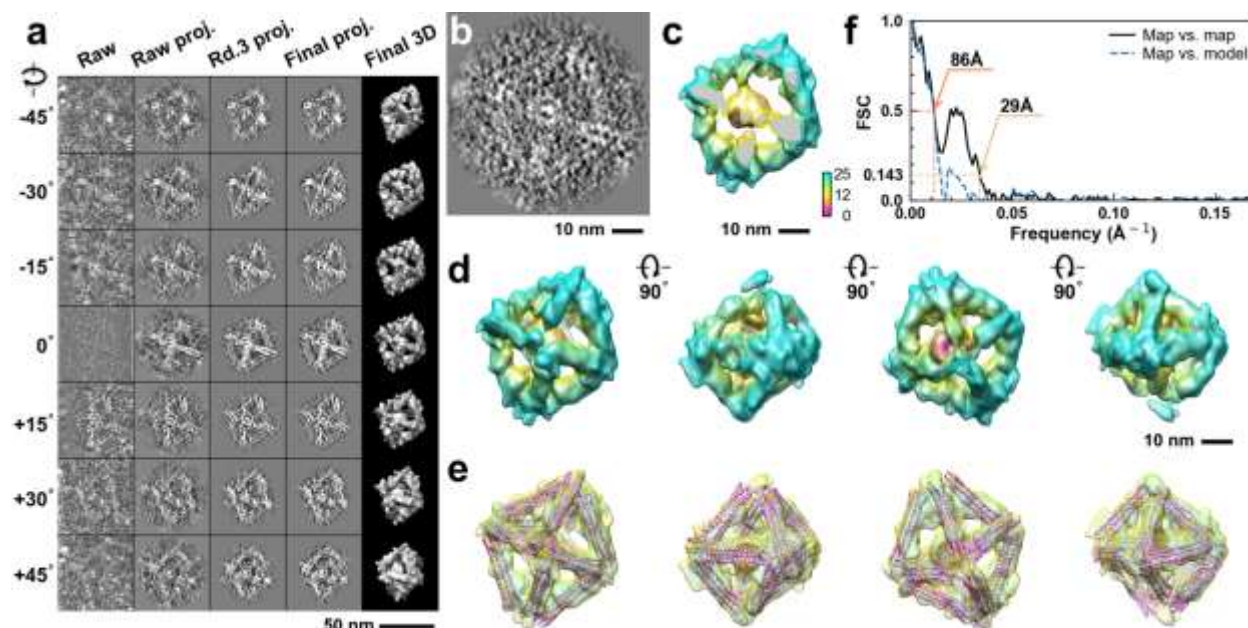

**Supplementary Fig. 118: IPET 3D reconstruction and model fitting of an individual unit-cell particle (Index: 110) within a 2D lattice with 100% ferritin loading.** **a**, Seven representative tilt images of a single unit-cell particle are shown in the first column (from left). The tilt images are aligned to a common center using IPET through iterative refinement. The projections of the raw, intermediate, and final 3D reconstruction at the corresponding angles are displayed in the subsequent four columns. **b**, A central cross-section (~23 nm thick) of the final reconstruction before masking is applied. **c**, 3D views of the central cross-section. **d**, Final 3D density map of this particle, viewed from four perpendicular directions. **e**, Final 3D reconstruction superimposed with the fitted model, viewed from four perpendicular directions. **f**, FSC analyses of the final map resolution using two methods: map-map FSC, where each map is reconstructed from one half of the images (even vs. odd tilt angle indices), and map-model FSC, where the model map is generated from the fitted model. Resolution assessments are provided based on tilt-based map-map and map-model FSC analyses at thresholds of FSC=0.5 and 0.143, respectively.

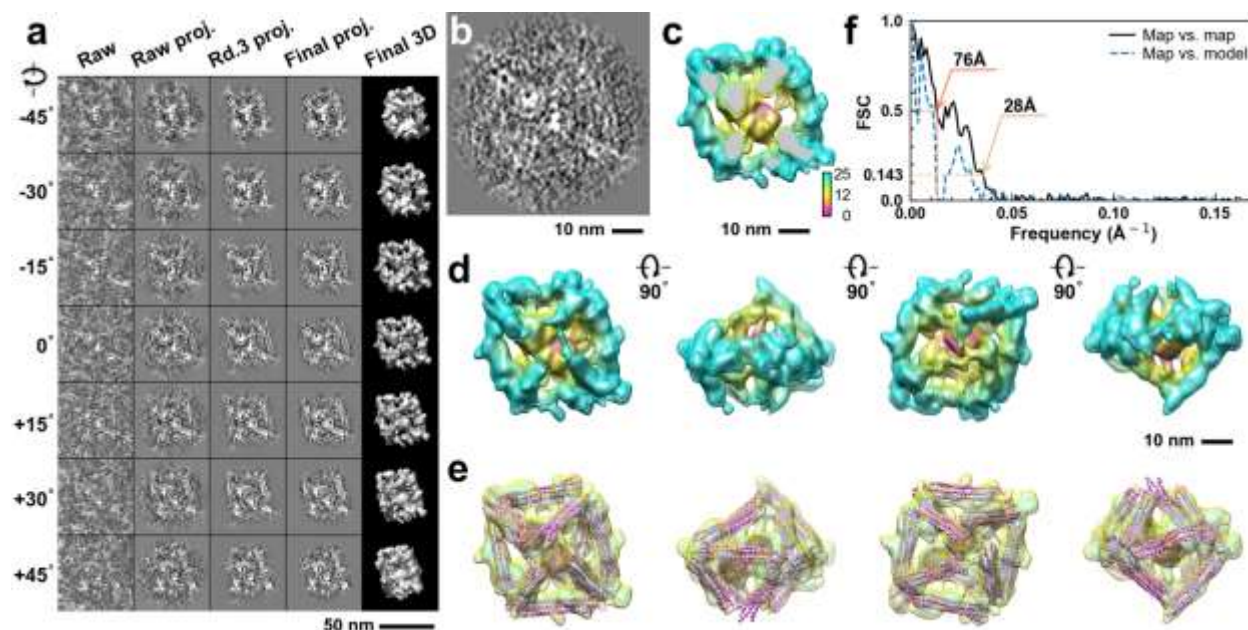

**Supplementary Fig. 119: IPET 3D reconstruction and model fitting of an individual unit-cell particle (Index: 111) within a 2D lattice with 100% ferritin loading.** **a**, Seven representative tilt images of a single unit-cell particle are shown in the first column (from left). The tilt images are aligned to a common center using IPET through iterative refinement. The projections of the raw, intermediate, and final 3D reconstruction at the corresponding angles are displayed in the subsequent four columns. **b**, A central cross-section (~23 nm thick) of the final reconstruction before masking is applied. **c**, 3D views of the central cross-section. **d**, Final 3D density map of this particle, viewed from four perpendicular directions. **e**, Final 3D reconstruction superimposed with the fitted model, viewed from four perpendicular directions. **f**, FSC analyses of the final map resolution using two methods: map-map FSC, where each map is reconstructed from one half of the images (even vs. odd tilt angle indices), and map-model FSC, where the model map is generated from the fitted model. Resolution assessments are provided based on tilt-based map-map and map-model FSC analyses at thresholds of FSC=0.5 and 0.143, respectively.

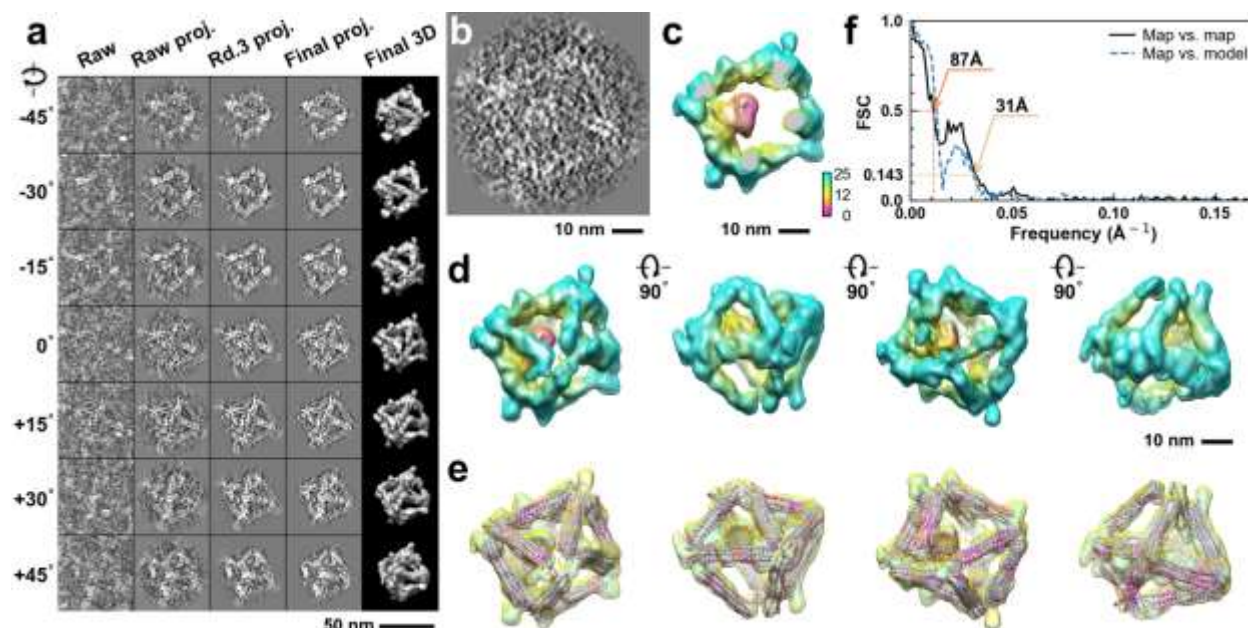

**Supplementary Fig. 120: IPET 3D reconstruction and model fitting of an individual unit-cell particle (Index: 112) within a 2D lattice with 100% ferritin loading.** **a**, Seven representative tilt images of a single unit-cell particle are shown in the first column (from left). The tilt images are aligned to a common center using IPET through iterative refinement. The projections of the raw, intermediate, and final 3D reconstruction at the corresponding angles are displayed in the subsequent four columns. **b**, A central cross-section (~23 nm thick) of the final reconstruction before masking is applied. **c**, 3D views of the central cross-section. **d**, Final 3D density map of this particle, viewed from four perpendicular directions. **e**, Final 3D reconstruction superimposed with the fitted model, viewed from four perpendicular directions. **f**, FSC analyses of the final map resolution using two methods: map-map FSC, where each map is reconstructed from one half of the images (even vs. odd tilt angle indices), and map-model FSC, where the model map is generated from the fitted model. Resolution assessments are provided based on tilt-based map-map and map-model FSC analyses at thresholds of FSC=0.5 and 0.143, respectively.

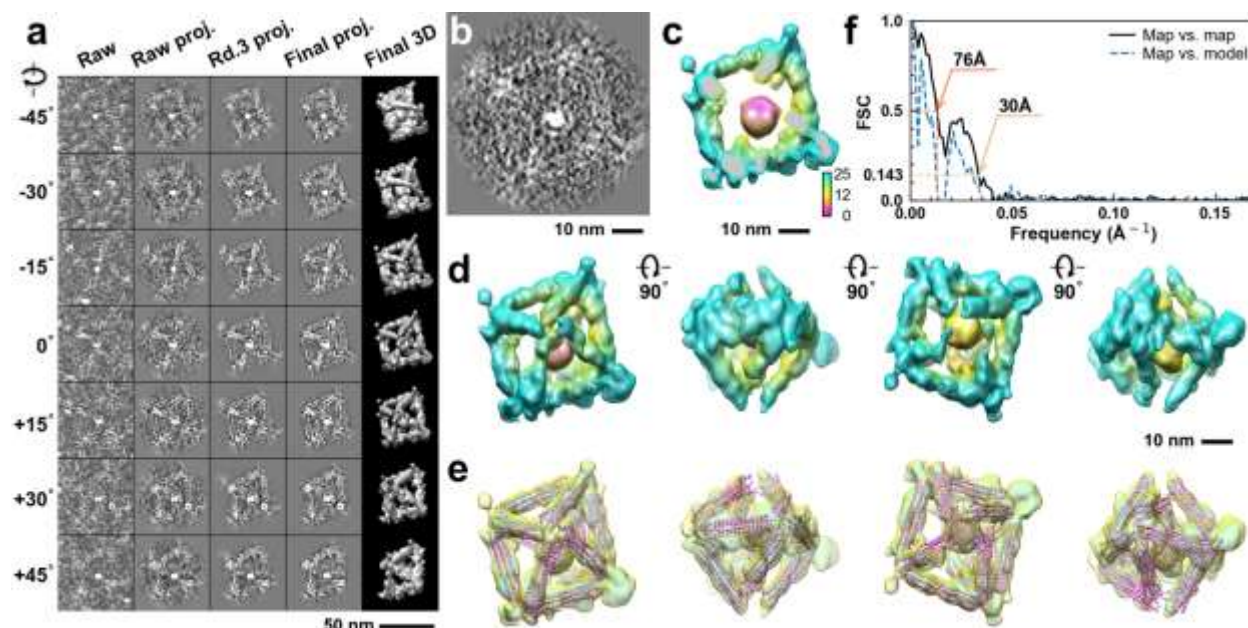

**Supplementary Fig. 121: IPET 3D reconstruction and model fitting of an individual unit-cell particle (Index: 113) within a 2D lattice with 100% ferritin loading.** **a**, Seven representative tilt images of a single unit-cell particle are shown in the first column (from left). The tilt images are aligned to a common center using IPET through iterative refinement. The projections of the raw, intermediate, and final 3D reconstruction at the corresponding angles are displayed in the subsequent four columns. **b**, A central cross-section (~23 nm thick) of the final reconstruction before masking is applied. **c**, 3D views of the central cross-section. **d**, Final 3D density map of this particle, viewed from four perpendicular directions. **e**, Final 3D reconstruction superimposed with the fitted model, viewed from four perpendicular directions. **f**, FSC analyses of the final map resolution using two methods: map-map FSC, where each map is reconstructed from one half of the images (even vs. odd tilt angle indices), and map-model FSC, where the model map is generated from the fitted model. Resolution assessments are provided based on tilt-based map-map and map-model FSC analyses at thresholds of FSC=0.5 and 0.143, respectively.



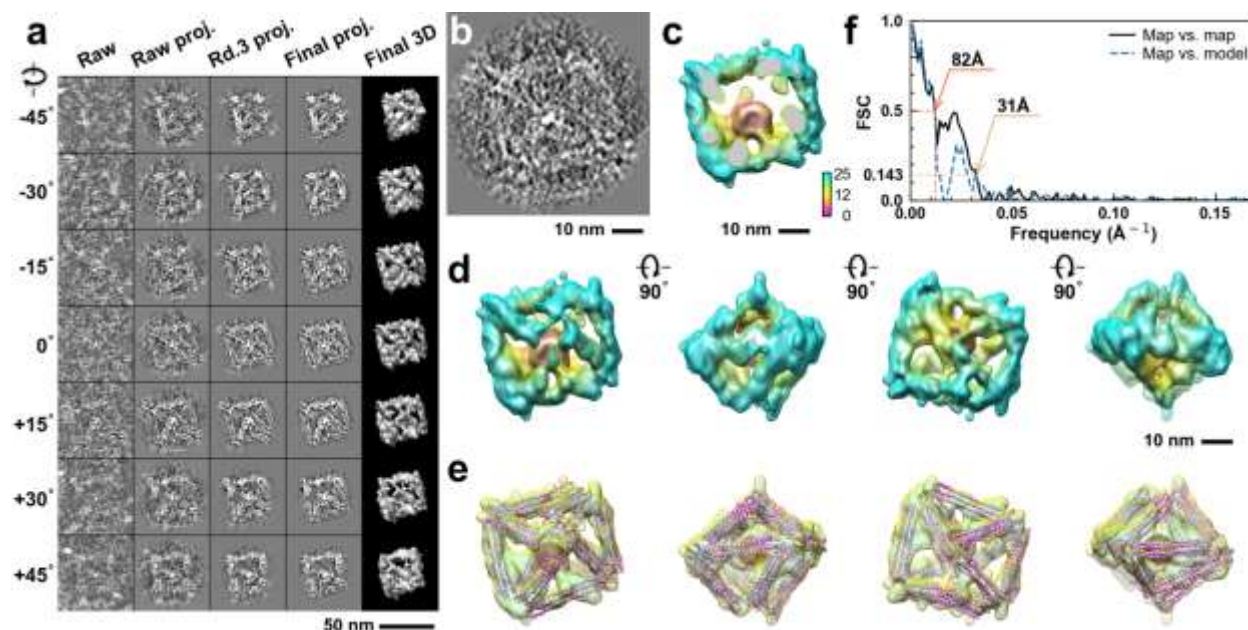

**Supplementary Fig. 122: IPET 3D reconstruction and model fitting of an individual unit-cell particle (Index: 114) within a 2D lattice with 100% ferritin loading.** **a**, Seven representative tilt images of a single unit-cell particle are shown in the first column (from left). The tilt images are aligned to a common center using IPET through iterative refinement. The projections of the raw, intermediate, and final 3D reconstruction at the corresponding angles are displayed in the subsequent four columns. **b**, A central cross-section (~23 nm thick) of the final reconstruction before masking is applied. **c**, 3D views of the central cross-section. **d**, Final 3D density map of this particle, viewed from four perpendicular directions. **e**, Final 3D reconstruction superimposed with the fitted model, viewed from four perpendicular directions. **f**, FSC analyses of the final map resolution using two methods: map-map FSC, where each map is reconstructed from one half of the images (even vs. odd tilt angle indices), and map-model FSC, where the model map is generated from the fitted model. Resolution assessments are provided based on tilt-based map-map and map-model FSC analyses at thresholds of FSC=0.5 and 0.143, respectively.

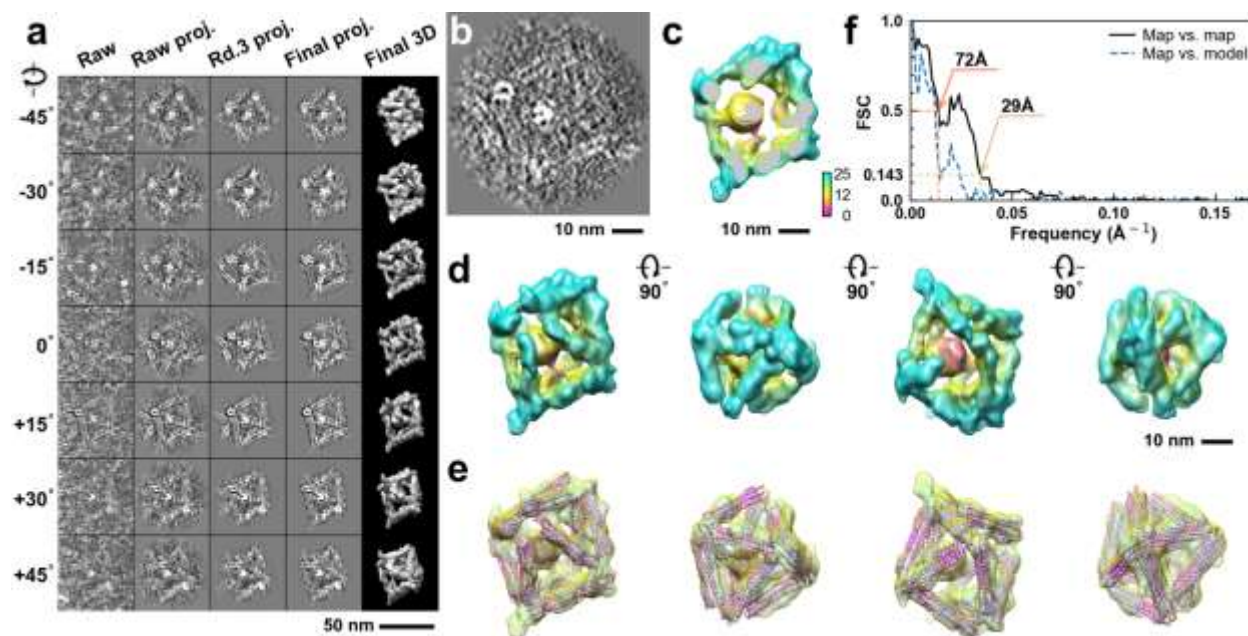

**Supplementary Fig. 123: IPET 3D reconstruction and model fitting of an individual unit-cell particle (Index: 115) within a 2D lattice with 100% ferritin loading.** **a**, Seven representative tilt images of a single unit-cell particle are shown in the first column (from left). The tilt images are aligned to a common center using IPET through iterative refinement. The projections of the raw, intermediate, and final 3D reconstruction at the corresponding angles are displayed in the subsequent four columns. **b**, A central cross-section (~23 nm thick) of the final reconstruction before masking is applied. **c**, 3D views of the central cross-section. **d**, Final 3D density map of this particle, viewed from four perpendicular directions. **e**, Final 3D reconstruction superimposed with the fitted model, viewed from four perpendicular directions. **f**, FSC analyses of the final map resolution using two methods: map-map FSC, where each map is reconstructed from one half of the images (even vs. odd tilt angle indices), and map-model FSC, where the model map is generated from the fitted model. Resolution assessments are provided based on tilt-based map-map and map-model FSC analyses at thresholds of FSC=0.5 and 0.143, respectively.

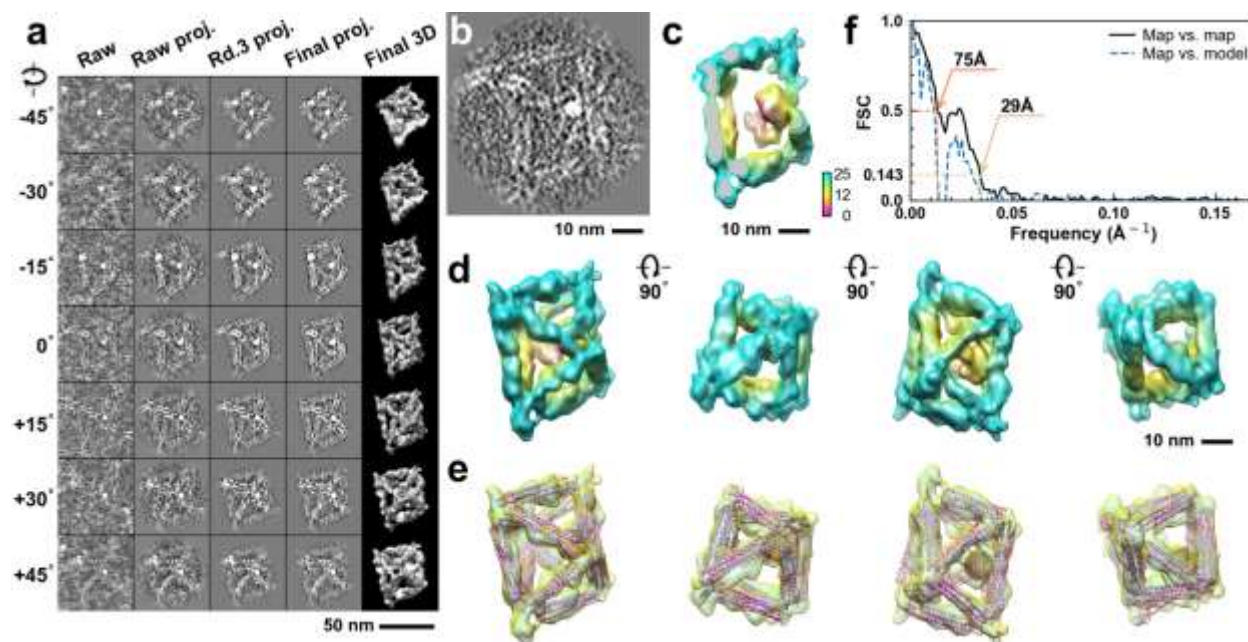

**Supplementary Fig. 124: IPET 3D reconstruction and model fitting of an individual unit-cell particle (Index: 116) within a 2D lattice with 100% ferritin loading.** **a**, Seven representative tilt images of a single unit-cell particle are shown in the first column (from left). The tilt images are aligned to a common center using IPET through iterative refinement. The projections of the raw, intermediate, and final 3D reconstruction at the corresponding angles are displayed in the subsequent four columns. **b**, A central cross-section (~23 nm thick) of the final reconstruction before masking is applied. **c**, 3D views of the central cross-section. **d**, Final 3D density map of this particle, viewed from four perpendicular directions. **e**, Final 3D reconstruction superimposed with the fitted model, viewed from four perpendicular directions. **f**, FSC analyses of the final map resolution using two methods: map-map FSC, where each map is reconstructed from one half of the images (even vs. odd tilt angle indices), and map-model FSC, where the model map is generated from the fitted model. Resolution assessments are provided based on tilt-based map-map and map-model FSC analyses at thresholds of FSC=0.5 and 0.143, respectively.

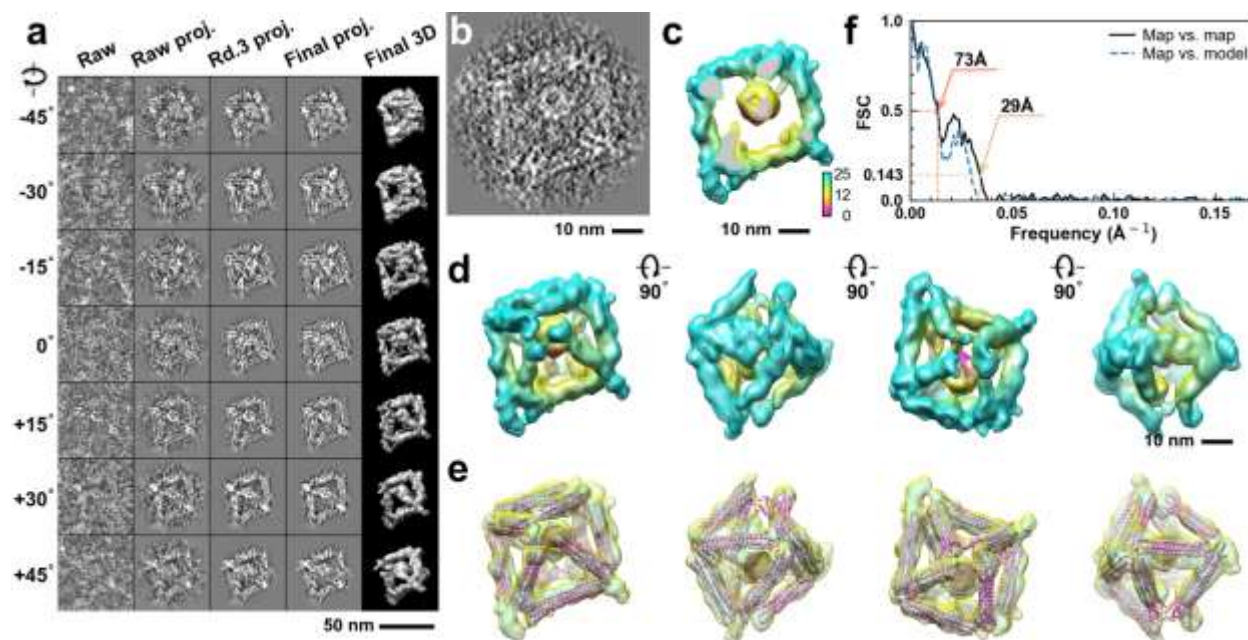

**Supplementary Fig. 125: IPET 3D reconstruction and model fitting of an individual unit-cell particle (Index: 117) within a 2D lattice with 100% ferritin loading.** **a**, Seven representative tilt images of a single unit-cell particle are shown in the first column (from left). The tilt images are aligned to a common center using IPET through iterative refinement. The projections of the raw, intermediate, and final 3D reconstruction at the corresponding angles are displayed in the subsequent four columns. **b**, A central cross-section (~23 nm thick) of the final reconstruction before masking is applied. **c**, 3D views of the central cross-section. **d**, Final 3D density map of this particle, viewed from four perpendicular directions. **e**, Final 3D reconstruction superimposed with the fitted model, viewed from four perpendicular directions. **f**, FSC analyses of the final map resolution using two methods: map-map FSC, where each map is reconstructed from one half of the images (even vs. odd tilt angle indices), and map-model FSC, where the model map is generated from the fitted model. Resolution assessments are provided based on tilt-based map-map and map-model FSC analyses at thresholds of FSC=0.5 and 0.143, respectively.



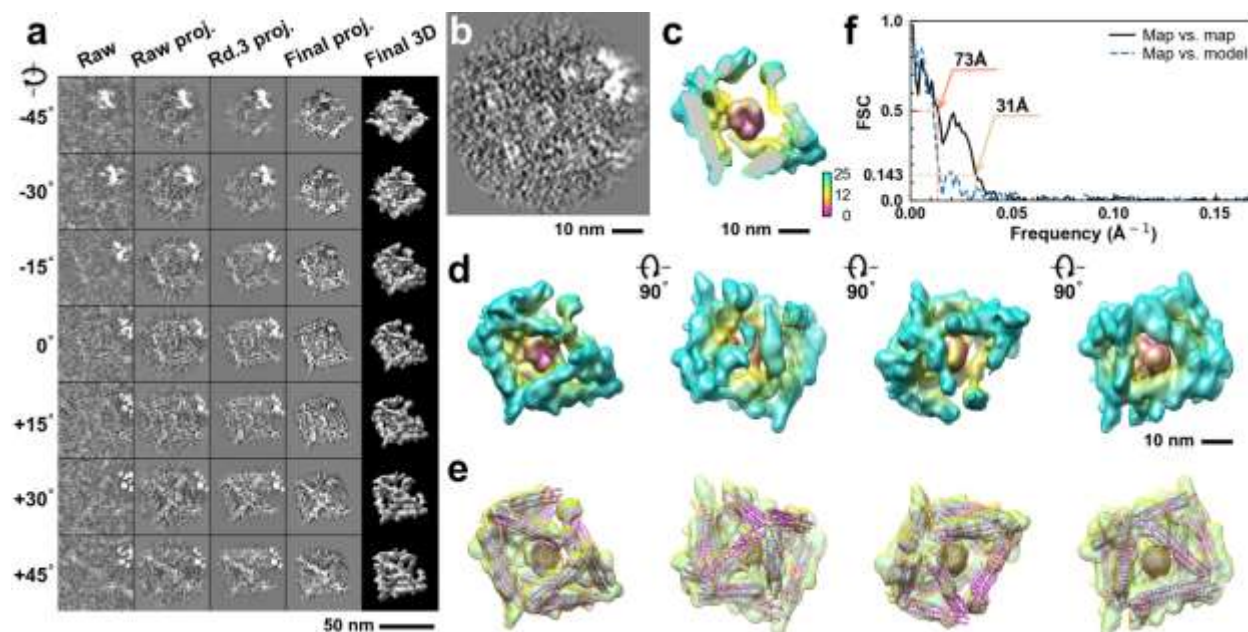

**Supplementary Fig. 126: IPET 3D reconstruction and model fitting of an individual unit-cell particle (Index: 118) within a 2D lattice with 100% ferritin loading.** **a**, Seven representative tilt images of a single unit-cell particle are shown in the first column (from left). The tilt images are aligned to a common center using IPET through iterative refinement. The projections of the raw, intermediate, and final 3D reconstruction at the corresponding angles are displayed in the subsequent four columns. **b**, A central cross-section (~23 nm thick) of the final reconstruction before masking is applied. **c**, 3D views of the central cross-section. **d**, Final 3D density map of this particle, viewed from four perpendicular directions. **e**, Final 3D reconstruction superimposed with the fitted model, viewed from four perpendicular directions. **f**, FSC analyses of the final map resolution using two methods: map-map FSC, where each map is reconstructed from one half of the images (even vs. odd tilt angle indices), and map-model FSC, where the model map is generated from the fitted model. Resolution assessments are provided based on tilt-based map-map and map-model FSC analyses at thresholds of FSC=0.5 and 0.143, respectively.

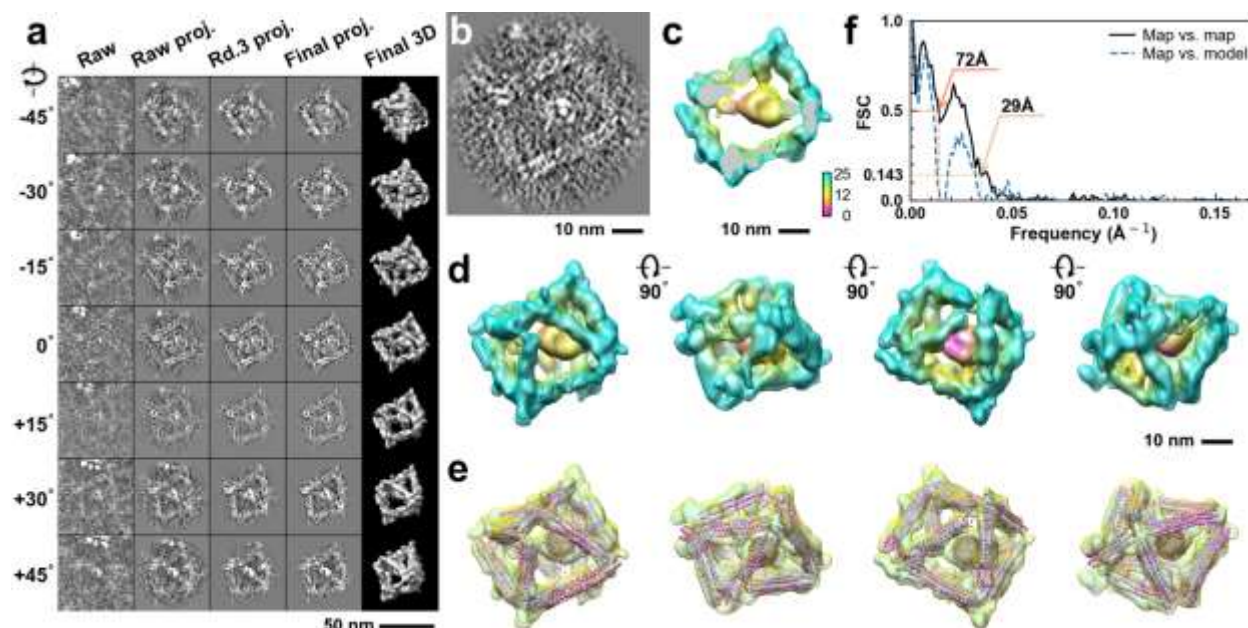

**Supplementary Fig. 127: IPET 3D reconstruction and model fitting of an individual unit-cell particle (Index: 119) within a 2D lattice with 100% ferritin loading.** **a**, Seven representative tilt images of a single unit-cell particle are shown in the first column (from left). The tilt images are aligned to a common center using IPET through iterative refinement. The projections of the raw, intermediate, and final 3D reconstruction at the corresponding angles are displayed in the subsequent four columns. **b**, A central cross-section (~23 nm thick) of the final reconstruction before masking is applied. **c**, 3D views of the central cross-section. **d**, Final 3D density map of this particle, viewed from four perpendicular directions. **e**, Final 3D reconstruction superimposed with the fitted model, viewed from four perpendicular directions. **f**, FSC analyses of the final map resolution using two methods: map-map FSC, where each map is reconstructed from one half of the images (even vs. odd tilt angle indices), and map-model FSC, where the model map is generated from the fitted model. Resolution assessments are provided based on tilt-based map-map and map-model FSC analyses at thresholds of FSC=0.5 and 0.143, respectively.

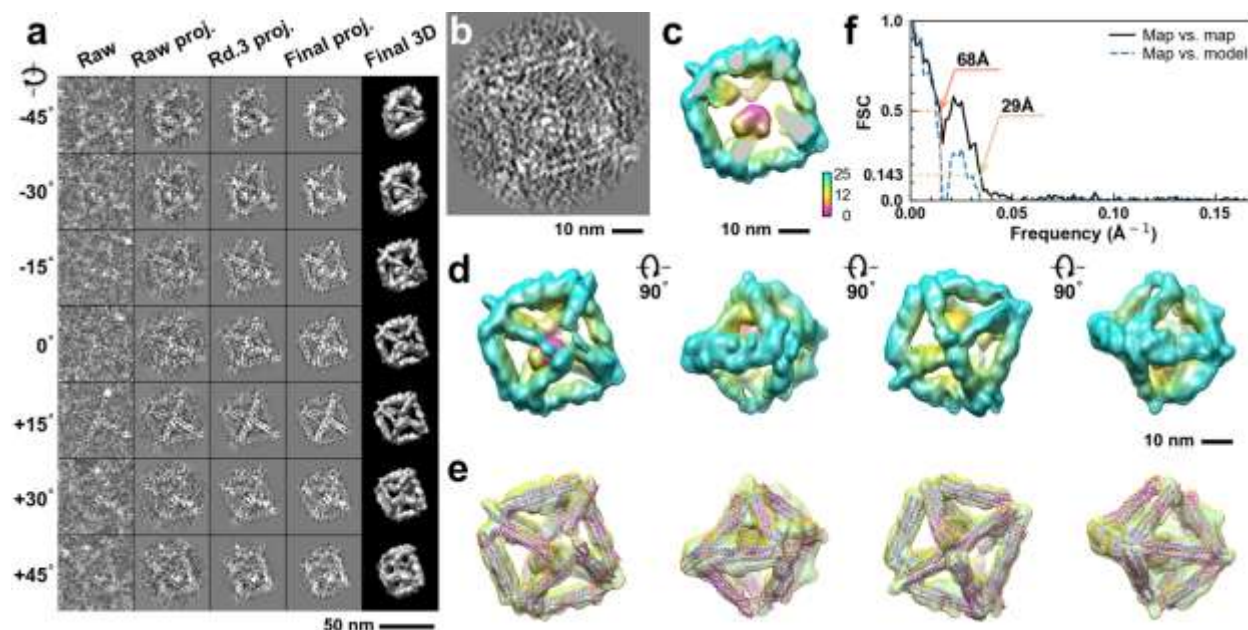

**Supplementary Fig. 128: IPET 3D reconstruction and model fitting of an individual unit-cell particle (Index: 120) within a 2D lattice with 100% ferritin loading.** **a**, Seven representative tilt images of a single unit-cell particle are shown in the first column (from left). The tilt images are aligned to a common center using IPET through iterative refinement. The projections of the raw, intermediate, and final 3D reconstruction at the corresponding angles are displayed in the subsequent four columns. **b**, A central cross-section (~23 nm thick) of the final reconstruction before masking is applied. **c**, 3D views of the central cross-section. **d**, Final 3D density map of this particle, viewed from four perpendicular directions. **e**, Final 3D reconstruction superimposed with the fitted model, viewed from four perpendicular directions. **f**, FSC analyses of the final map resolution using two methods: map-map FSC, where each map is reconstructed from one half of the images (even vs. odd tilt angle indices), and map-model FSC, where the model map is generated from the fitted model. Resolution assessments are provided based on tilt-based map-map and map-model FSC analyses at thresholds of FSC=0.5 and 0.143, respectively.

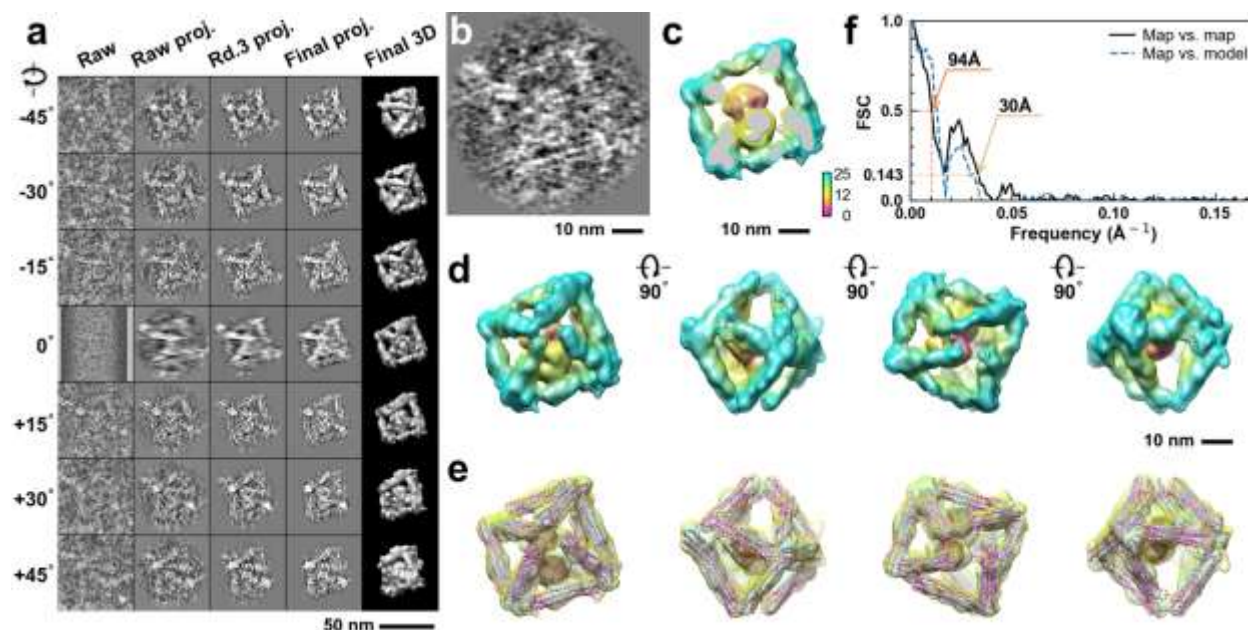

**Supplementary Fig. 129: IPET 3D reconstruction and model fitting of an individual unit-cell particle (Index: 121) within a 2D lattice with 100% ferritin loading.** **a**, Seven representative tilt images of a single unit-cell particle are shown in the first column (from left). The tilt images are aligned to a common center using IPET through iterative refinement. The projections of the raw, intermediate, and final 3D reconstruction at the corresponding angles are displayed in the subsequent four columns. **b**, A central cross-section (~23 nm thick) of the final reconstruction before masking is applied. **c**, 3D views of the central cross-section. **d**, Final 3D density map of this particle, viewed from four perpendicular directions. **e**, Final 3D reconstruction superimposed with the fitted model, viewed from four perpendicular directions. **f**, FSC analyses of the final map resolution using two methods: map-map FSC, where each map is reconstructed from one half of the images (even vs. odd tilt angle indices), and map-model FSC, where the model map is generated from the fitted model. Resolution assessments are provided based on tilt-based map-map and map-model FSC analyses at thresholds of FSC=0.5 and 0.143, respectively.



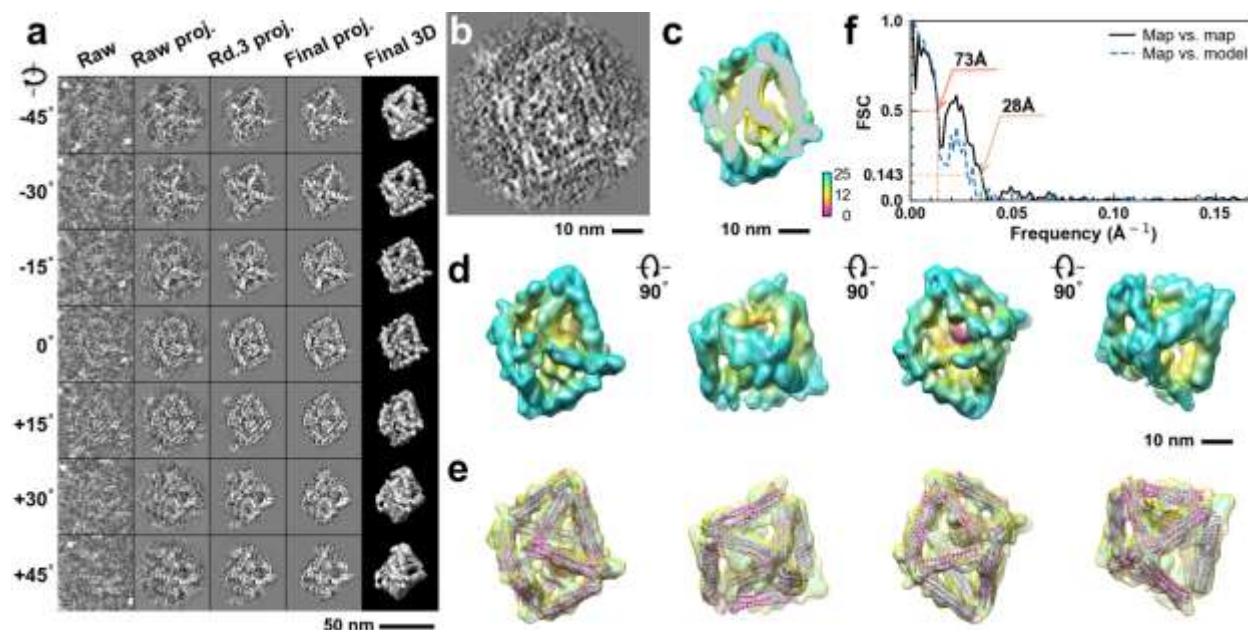

**Supplementary Fig. 130: IPET 3D reconstruction and model fitting of an individual unit-cell particle (Index: 122) within a 2D lattice with 100% ferritin loading.** **a**, Seven representative tilt images of a single unit-cell particle are shown in the first column (from left). The tilt images are aligned to a common center using IPET through iterative refinement. The projections of the raw, intermediate, and final 3D reconstruction at the corresponding angles are displayed in the subsequent four columns. **b**, A central cross-section (~23 nm thick) of the final reconstruction before masking is applied. **c**, 3D views of the central cross-section. **d**, Final 3D density map of this particle, viewed from four perpendicular directions. **e**, Final 3D reconstruction superimposed with the fitted model, viewed from four perpendicular directions. **f**, FSC analyses of the final map resolution using two methods: map-map FSC, where each map is reconstructed from one half of the images (even vs. odd tilt angle indices), and map-model FSC, where the model map is generated from the fitted model. Resolution assessments are provided based on tilt-based map-map and map-model FSC analyses at thresholds of FSC=0.5 and 0.143, respectively.

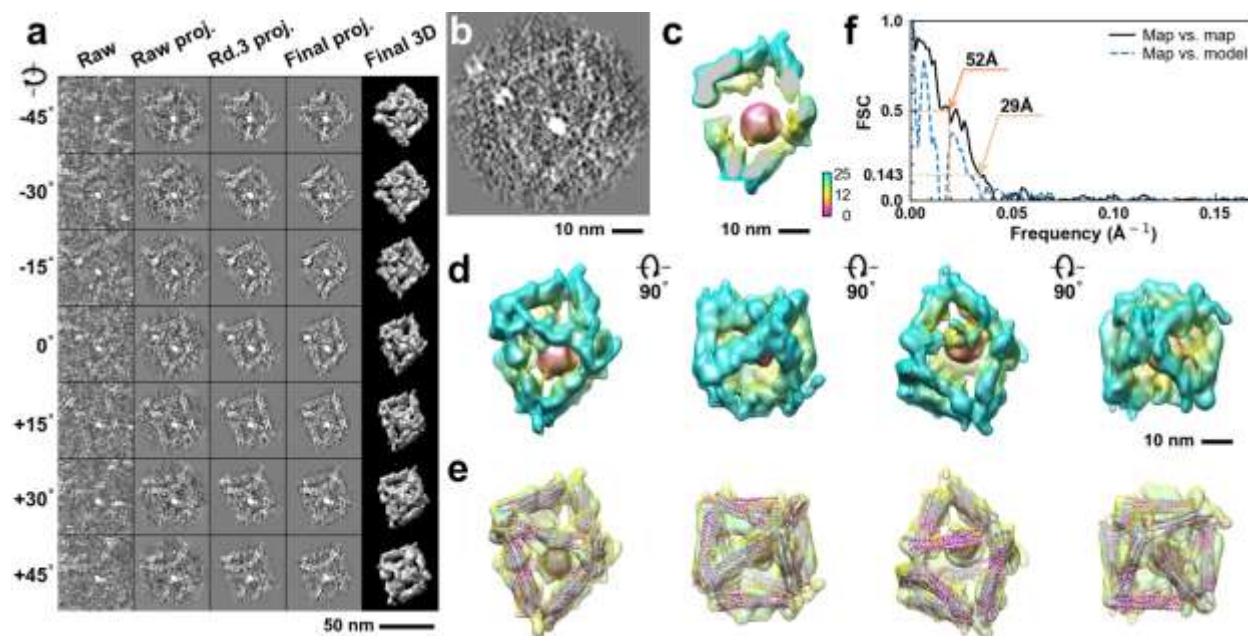

**Supplementary Fig. 131: IPET 3D reconstruction and model fitting of an individual unit-cell particle (Index: 123) within a 2D lattice with 100% ferritin loading.** **a**, Seven representative tilt images of a single unit-cell particle are shown in the first column (from left). The tilt images are aligned to a common center using IPET through iterative refinement. The projections of the raw, intermediate, and final 3D reconstruction at the corresponding angles are displayed in the subsequent four columns. **b**, A central cross-section (~23 nm thick) of the final reconstruction before masking is applied. **c**, 3D views of the central cross-section. **d**, Final 3D density map of this particle, viewed from four perpendicular directions. **e**, Final 3D reconstruction superimposed with the fitted model, viewed from four perpendicular directions. **f**, FSC analyses of the final map resolution using two methods: map-map FSC, where each map is reconstructed from one half of the images (even vs. odd tilt angle indices), and map-model FSC, where the model map is generated from the fitted model. Resolution assessments are provided based on tilt-based map-map and map-model FSC analyses at thresholds of FSC=0.5 and 0.143, respectively.

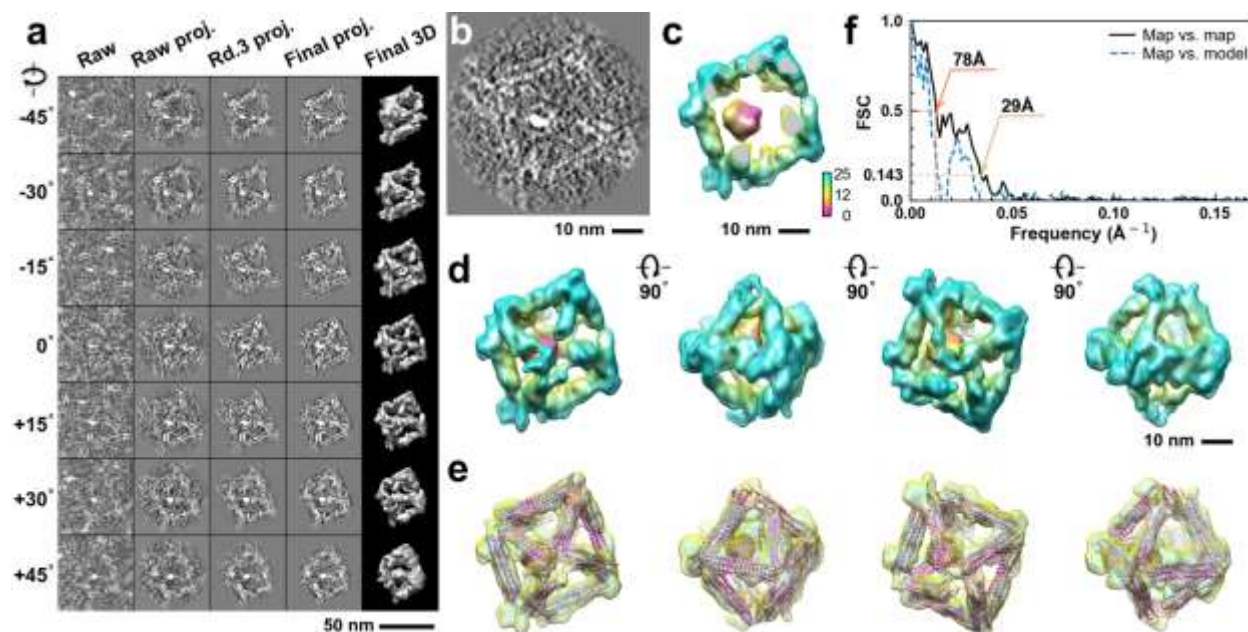

**Supplementary Fig. 132: IPET 3D reconstruction and model fitting of an individual unit-cell particle (Index: 124) within a 2D lattice with 100% ferritin loading.** **a**, Seven representative tilt images of a single unit-cell particle are shown in the first column (from left). The tilt images are aligned to a common center using IPET through iterative refinement. The projections of the raw, intermediate, and final 3D reconstruction at the corresponding angles are displayed in the subsequent four columns. **b**, A central cross-section (~23 nm thick) of the final reconstruction before masking is applied. **c**, 3D views of the central cross-section. **d**, Final 3D density map of this particle, viewed from four perpendicular directions. **e**, Final 3D reconstruction superimposed with the fitted model, viewed from four perpendicular directions. **f**, FSC analyses of the final map resolution using two methods: map-map FSC, where each map is reconstructed from one half of the images (even vs. odd tilt angle indices), and map-model FSC, where the model map is generated from the fitted model. Resolution assessments are provided based on tilt-based map-map and map-model FSC analyses at thresholds of FSC=0.5 and 0.143, respectively.

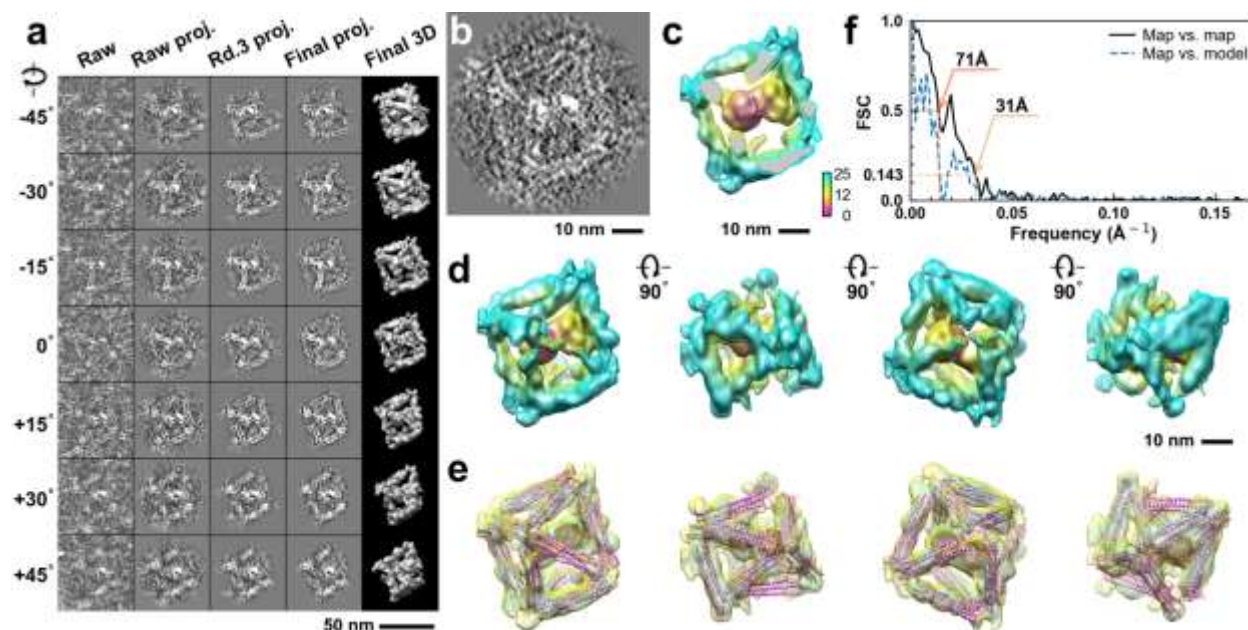

**Supplementary Fig. 133: IPET 3D reconstruction and model fitting of an individual unit-cell particle (Index: 125) within a 2D lattice with 100% ferritin loading.** **a**, Seven representative tilt images of a single unit-cell particle are shown in the first column (from left). The tilt images are aligned to a common center using IPET through iterative refinement. The projections of the raw, intermediate, and final 3D reconstruction at the corresponding angles are displayed in the subsequent four columns. **b**, A central cross-section (~23 nm thick) of the final reconstruction before masking is applied. **c**, 3D views of the central cross-section. **d**, Final 3D density map of this particle, viewed from four perpendicular directions. **e**, Final 3D reconstruction superimposed with the fitted model, viewed from four perpendicular directions. **f**, FSC analyses of the final map resolution using two methods: map-map FSC, where each map is reconstructed from one half of the images (even vs. odd tilt angle indices), and map-model FSC, where the model map is generated from the fitted model. Resolution assessments are provided based on tilt-based map-map and map-model FSC analyses at thresholds of FSC=0.5 and 0.143, respectively.



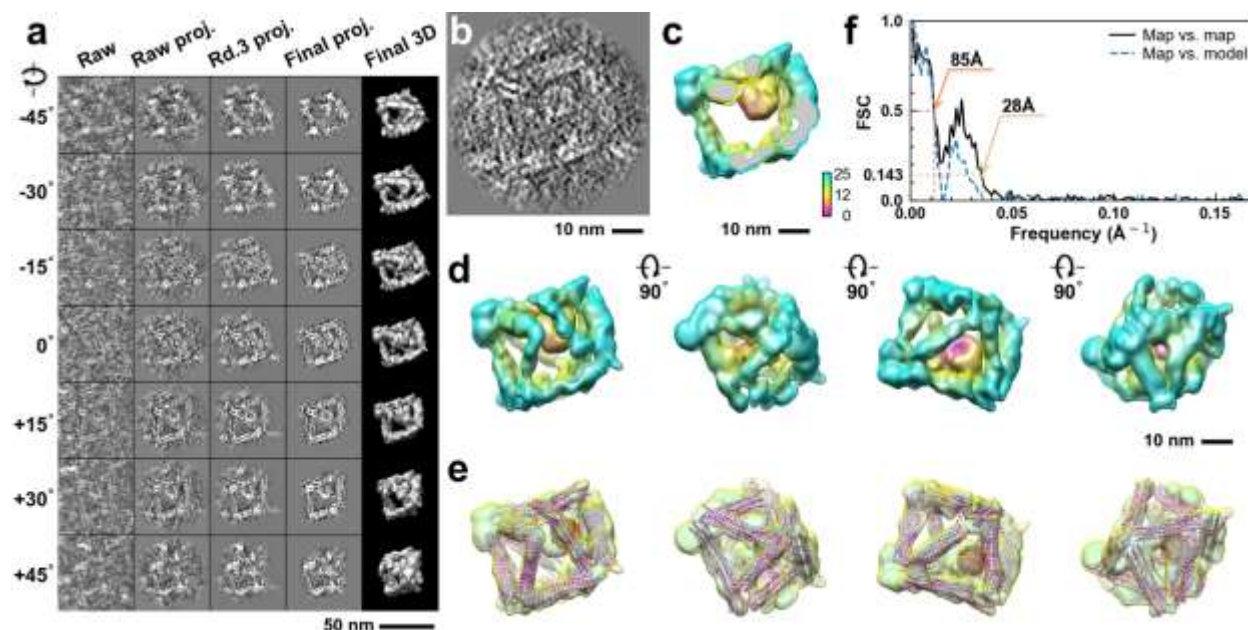

**Supplementary Fig. 134: IPET 3D reconstruction and model fitting of an individual unit-cell particle (Index: 126) within a 2D lattice with 100% ferritin loading.** **a**, Seven representative tilt images of a single unit-cell particle are shown in the first column (from left). The tilt images are aligned to a common center using IPET through iterative refinement. The projections of the raw, intermediate, and final 3D reconstruction at the corresponding angles are displayed in the subsequent four columns. **b**, A central cross-section (~23 nm thick) of the final reconstruction before masking is applied. **c**, 3D views of the central cross-section. **d**, Final 3D density map of this particle, viewed from four perpendicular directions. **e**, Final 3D reconstruction superimposed with the fitted model, viewed from four perpendicular directions. **f**, FSC analyses of the final map resolution using two methods: map-map FSC, where each map is reconstructed from one half of the images (even vs. odd tilt angle indices), and map-model FSC, where the model map is generated from the fitted model. Resolution assessments are provided based on tilt-based map-map and map-model FSC analyses at thresholds of FSC=0.5 and 0.143, respectively.

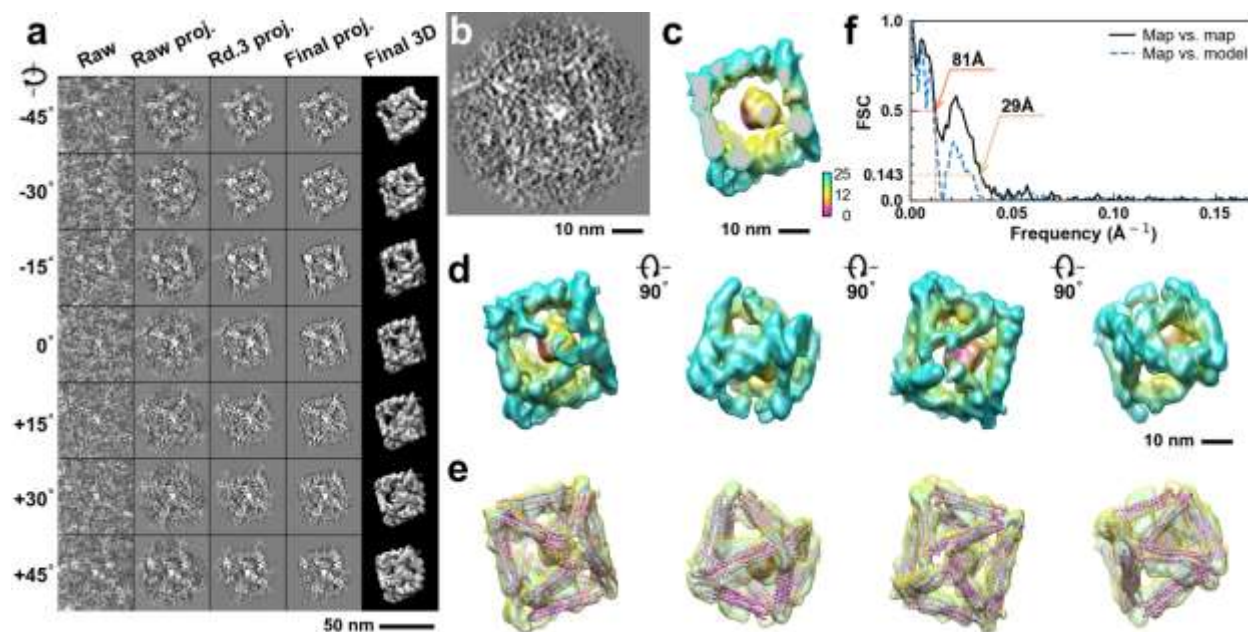

**Supplementary Fig. 135: IPET 3D reconstruction and model fitting of an individual unit-cell particle (Index: 127) within a 2D lattice with 100% ferritin loading.** **a**, Seven representative tilt images of a single unit-cell particle are shown in the first column (from left). The tilt images are aligned to a common center using IPET through iterative refinement. The projections of the raw, intermediate, and final 3D reconstruction at the corresponding angles are displayed in the subsequent four columns. **b**, A central cross-section (~23 nm thick) of the final reconstruction before masking is applied. **c**, 3D views of the central cross-section. **d**, Final 3D density map of this particle, viewed from four perpendicular directions. **e**, Final 3D reconstruction superimposed with the fitted model, viewed from four perpendicular directions. **f**, FSC analyses of the final map resolution using two methods: map-map FSC, where each map is reconstructed from one half of the images (even vs. odd tilt angle indices), and map-model FSC, where the model map is generated from the fitted model. Resolution assessments are provided based on tilt-based map-map and map-model FSC analyses at thresholds of FSC=0.5 and 0.143, respectively.

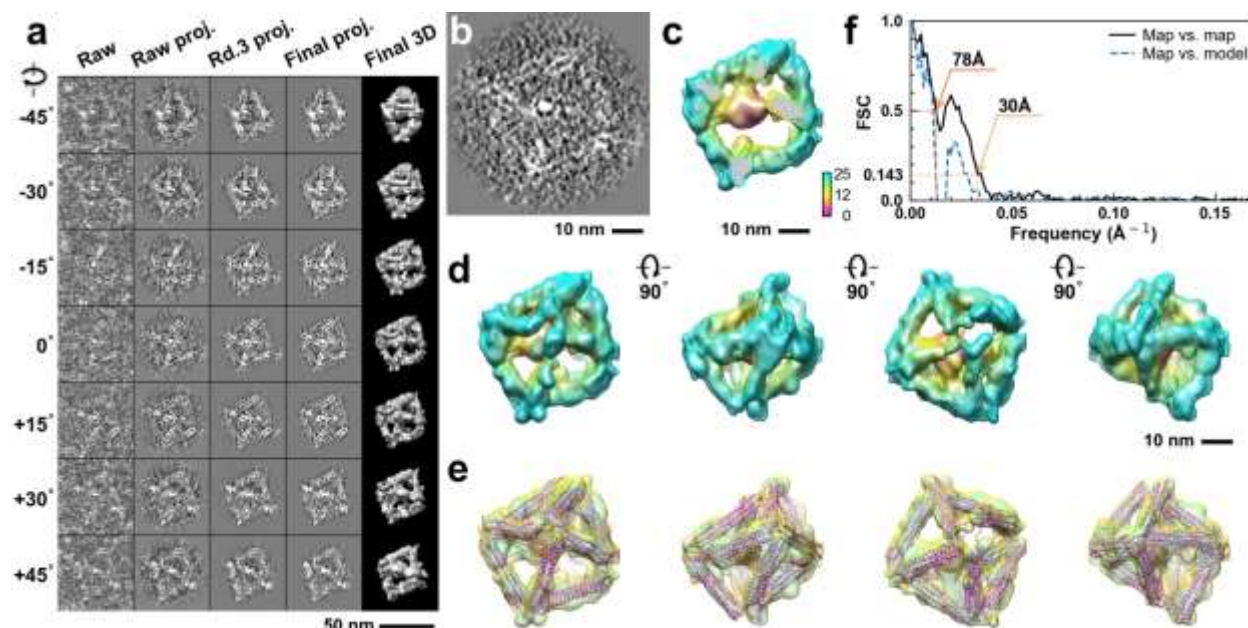

**Supplementary Fig. 136: IPET 3D reconstruction and model fitting of an individual unit-cell particle (Index: 128) within a 2D lattice with 100% ferritin loading.** **a**, Seven representative tilt images of a single unit-cell particle are shown in the first column (from left). The tilt images are aligned to a common center using IPET through iterative refinement. The projections of the raw, intermediate, and final 3D reconstruction at the corresponding angles are displayed in the subsequent four columns. **b**, A central cross-section (~23 nm thick) of the final reconstruction before masking is applied. **c**, 3D views of the central cross-section. **d**, Final 3D density map of this particle, viewed from four perpendicular directions. **e**, Final 3D reconstruction superimposed with the fitted model, viewed from four perpendicular directions. **f**, FSC analyses of the final map resolution using two methods: map-map FSC, where each map is reconstructed from one half of the images (even vs. odd tilt angle indices), and map-model FSC, where the model map is generated from the fitted model. Resolution assessments are provided based on tilt-based map-map and map-model FSC analyses at thresholds of FSC=0.5 and 0.143, respectively.

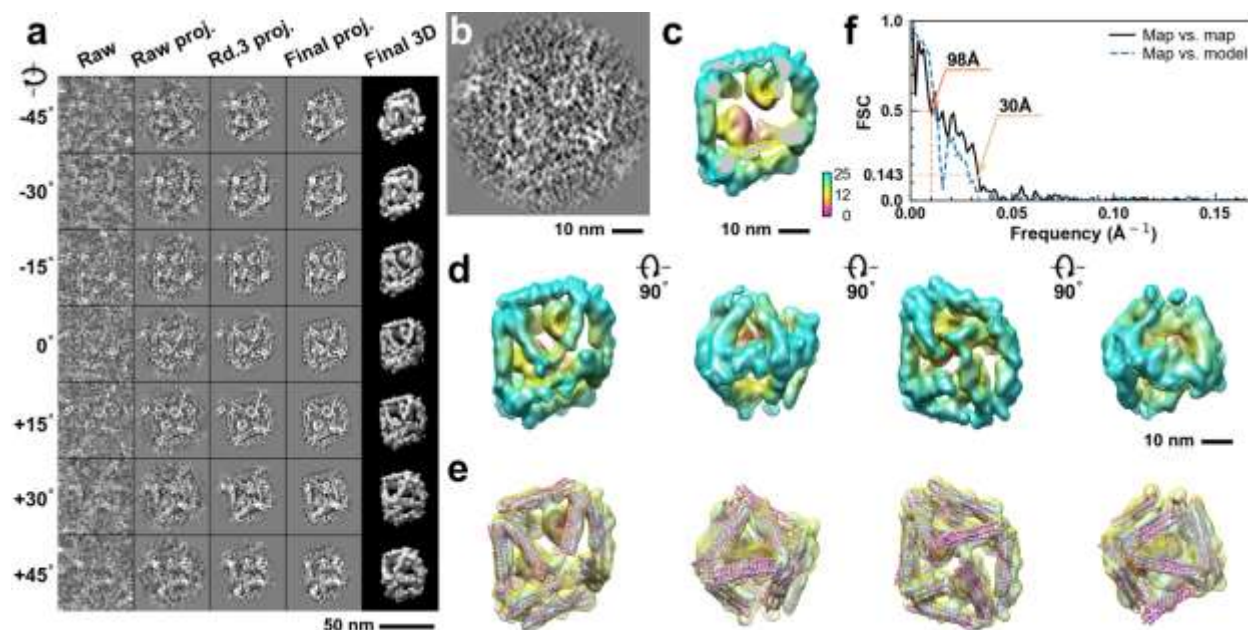

**Supplementary Fig. 137: IPET 3D reconstruction and model fitting of an individual unit-cell particle (Index: 129) within a 2D lattice with 100% ferritin loading.** **a**, Seven representative tilt images of a single unit-cell particle are shown in the first column (from left). The tilt images are aligned to a common center using IPET through iterative refinement. The projections of the raw, intermediate, and final 3D reconstruction at the corresponding angles are displayed in the subsequent four columns. **b**, A central cross-section (~23 nm thick) of the final reconstruction before masking is applied. **c**, 3D views of the central cross-section. **d**, Final 3D density map of this particle, viewed from four perpendicular directions. **e**, Final 3D reconstruction superimposed with the fitted model, viewed from four perpendicular directions. **f**, FSC analyses of the final map resolution using two methods: map-map FSC, where each map is reconstructed from one half of the images (even vs. odd tilt angle indices), and map-model FSC, where the model map is generated from the fitted model. Resolution assessments are provided based on tilt-based map-map and map-model FSC analyses at thresholds of FSC=0.5 and 0.143, respectively.



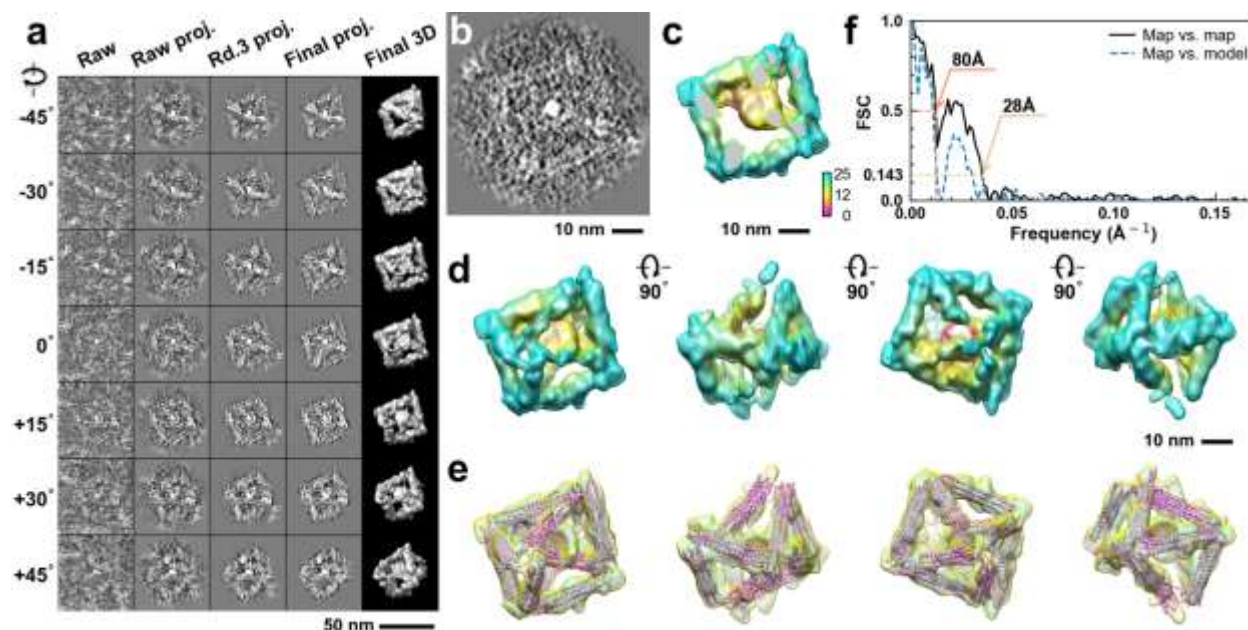

**Supplementary Fig. 138: IPET 3D reconstruction and model fitting of an individual unit-cell particle (Index: 130) within a 2D lattice with 100% ferritin loading.** **a**, Seven representative tilt images of a single unit-cell particle are shown in the first column (from left). The tilt images are aligned to a common center using IPET through iterative refinement. The projections of the raw, intermediate, and final 3D reconstruction at the corresponding angles are displayed in the subsequent four columns. **b**, A central cross-section (~23 nm thick) of the final reconstruction before masking is applied. **c**, 3D views of the central cross-section. **d**, Final 3D density map of this particle, viewed from four perpendicular directions. **e**, Final 3D reconstruction superimposed with the fitted model, viewed from four perpendicular directions. **f**, FSC analyses of the final map resolution using two methods: map-map FSC, where each map is reconstructed from one half of the images (even vs. odd tilt angle indices), and map-model FSC, where the model map is generated from the fitted model. Resolution assessments are provided based on tilt-based map-map and map-model FSC analyses at thresholds of FSC=0.5 and 0.143, respectively.

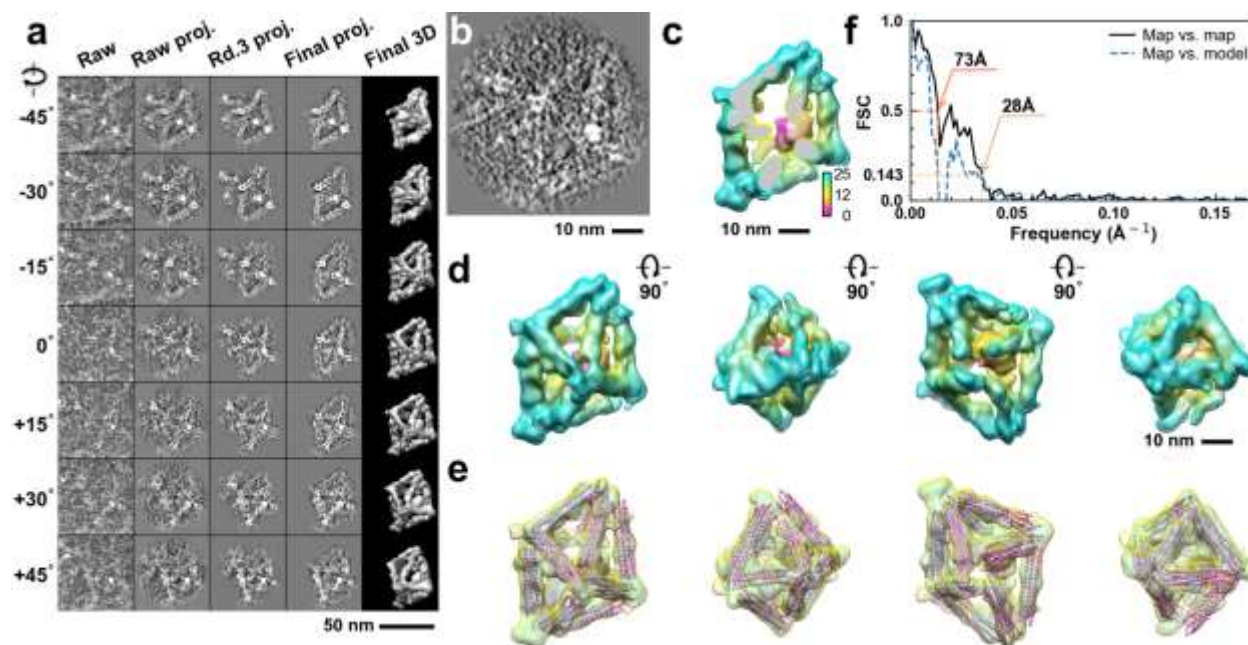

**Supplementary Fig. 139: IPET 3D reconstruction and model fitting of an individual unit-cell particle (Index: 131) within a 2D lattice with 100% ferritin loading.** **a**, Seven representative tilt images of a single unit-cell particle are shown in the first column (from left). The tilt images are aligned to a common center using IPET through iterative refinement. The projections of the raw, intermediate, and final 3D reconstruction at the corresponding angles are displayed in the subsequent four columns. **b**, A central cross-section (~23 nm thick) of the final reconstruction before masking is applied. **c**, 3D views of the central cross-section. **d**, Final 3D density map of this particle, viewed from four perpendicular directions. **e**, Final 3D reconstruction superimposed with the fitted model, viewed from four perpendicular directions. **f**, FSC analyses of the final map resolution using two methods: map-map FSC, where each map is reconstructed from one half of the images (even vs. odd tilt angle indices), and map-model FSC, where the model map is generated from the fitted model. Resolution assessments are provided based on tilt-based map-map and map-model FSC analyses at thresholds of FSC=0.5 and 0.143, respectively.

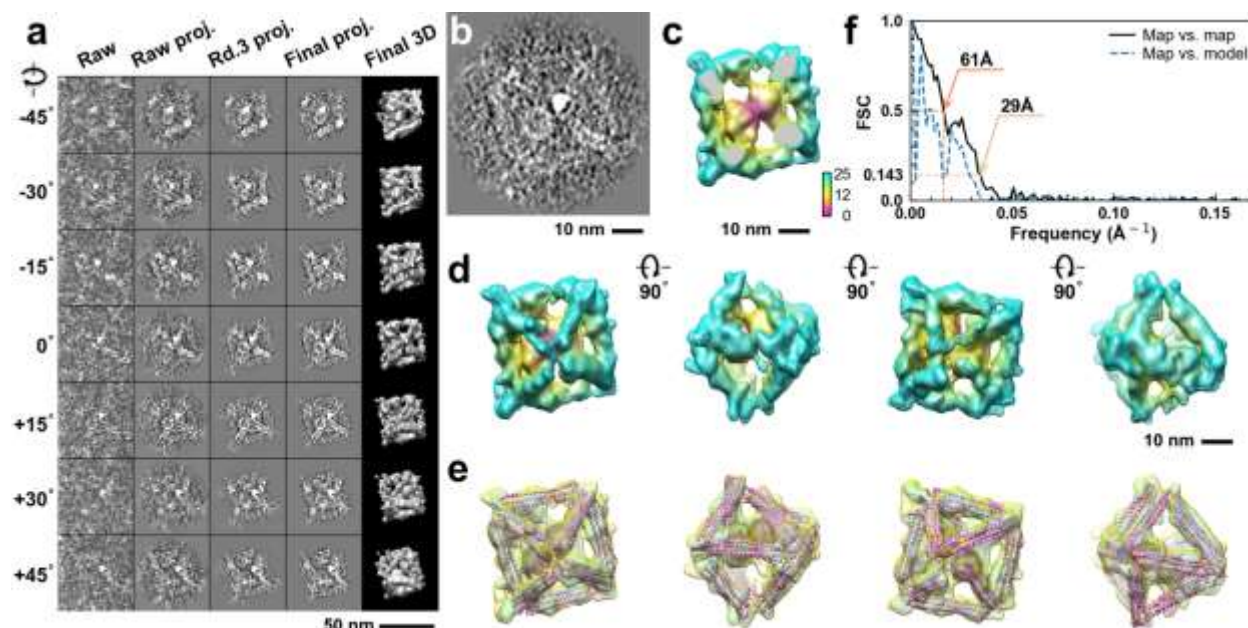

**Supplementary Fig. 140: IPET 3D reconstruction and model fitting of an individual unit-cell particle (Index: 132) within a 2D lattice with 100% ferritin loading.** **a**, Seven representative tilt images of a single unit-cell particle are shown in the first column (from left). The tilt images are aligned to a common center using IPET through iterative refinement. The projections of the raw, intermediate, and final 3D reconstruction at the corresponding angles are displayed in the subsequent four columns. **b**, A central cross-section (~23 nm thick) of the final reconstruction before masking is applied. **c**, 3D views of the central cross-section. **d**, Final 3D density map of this particle, viewed from four perpendicular directions. **e**, Final 3D reconstruction superimposed with the fitted model, viewed from four perpendicular directions. **f**, FSC analyses of the final map resolution using two methods: map-map FSC, where each map is reconstructed from one half of the images (even vs. odd tilt angle indices), and map-model FSC, where the model map is generated from the fitted model. Resolution assessments are provided based on tilt-based map-map and map-model FSC analyses at thresholds of FSC=0.5 and 0.143, respectively.

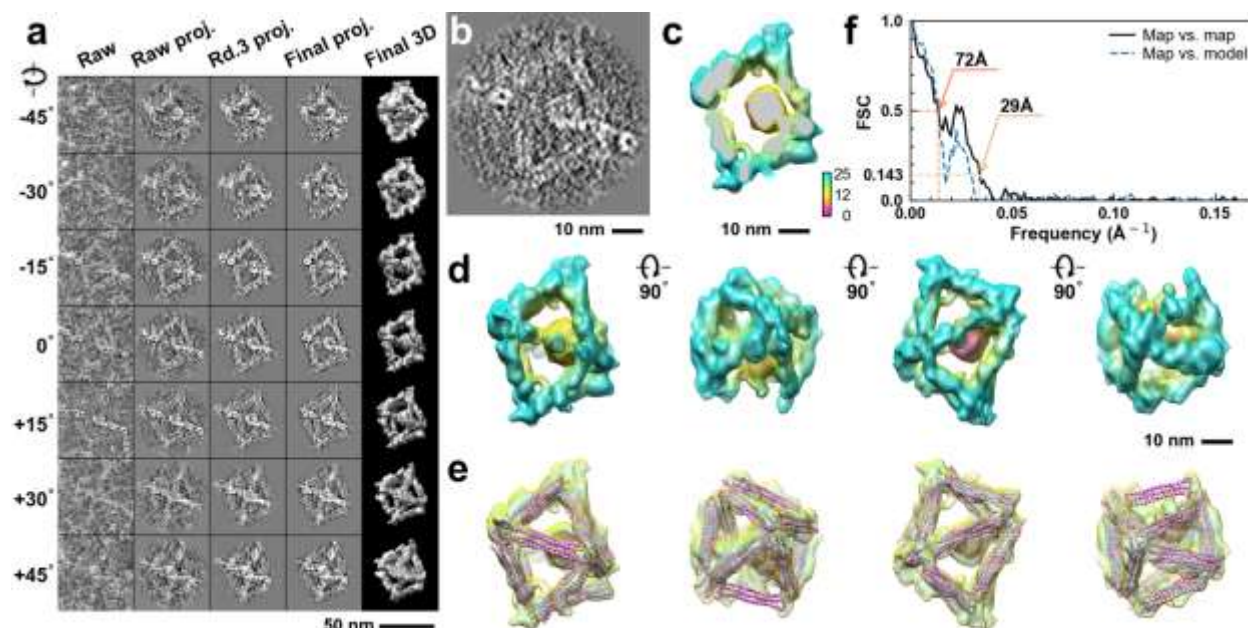

**Supplementary Fig. 141: IPET 3D reconstruction and model fitting of an individual unit-cell particle (Index: 133) within a 2D lattice with 100% ferritin loading.** **a**, Seven representative tilt images of a single unit-cell particle are shown in the first column (from left). The tilt images are aligned to a common center using IPET through iterative refinement. The projections of the raw, intermediate, and final 3D reconstruction at the corresponding angles are displayed in the subsequent four columns. **b**, A central cross-section (~23 nm thick) of the final reconstruction before masking is applied. **c**, 3D views of the central cross-section. **d**, Final 3D density map of this particle, viewed from four perpendicular directions. **e**, Final 3D reconstruction superimposed with the fitted model, viewed from four perpendicular directions. **f**, FSC analyses of the final map resolution using two methods: map-map FSC, where each map is reconstructed from one half of the images (even vs. odd tilt angle indices), and map-model FSC, where the model map is generated from the fitted model. Resolution assessments are provided based on tilt-based map-map and map-model FSC analyses at thresholds of FSC=0.5 and 0.143, respectively.



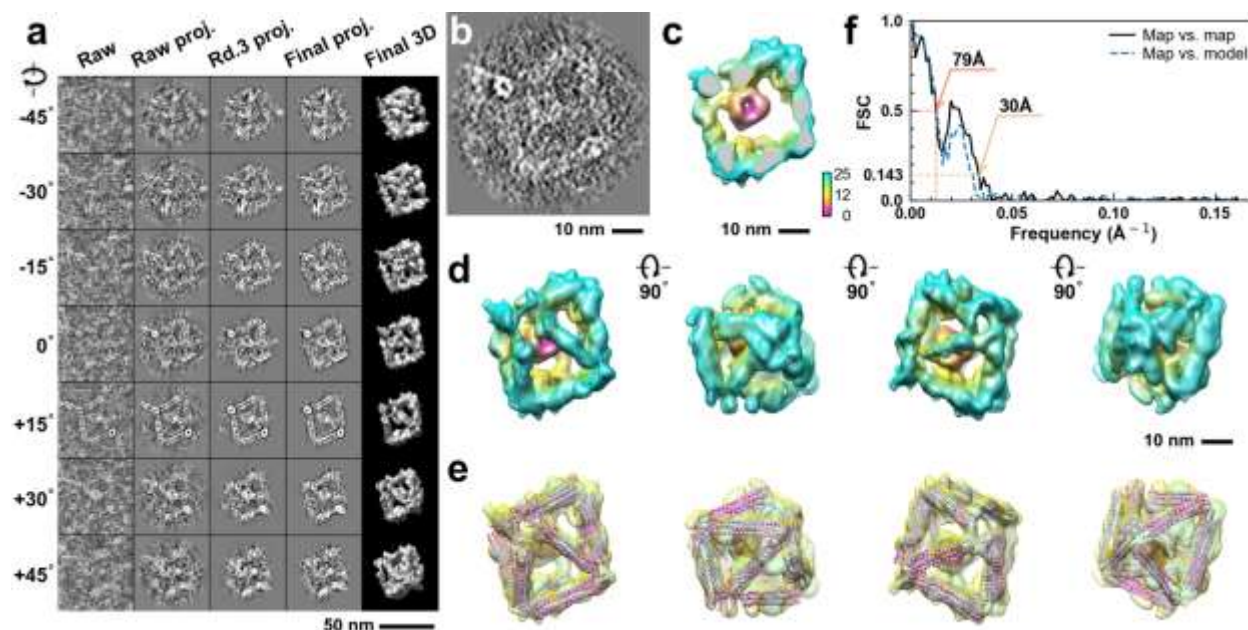

**Supplementary Fig. 142: IPET 3D reconstruction and model fitting of an individual unit-cell particle (Index: 134) within a 2D lattice with 100% ferritin loading.** **a**, Seven representative tilt images of a single unit-cell particle are shown in the first column (from left). The tilt images are aligned to a common center using IPET through iterative refinement. The projections of the raw, intermediate, and final 3D reconstruction at the corresponding angles are displayed in the subsequent four columns. **b**, A central cross-section (~23 nm thick) of the final reconstruction before masking is applied. **c**, 3D views of the central cross-section. **d**, Final 3D density map of this particle, viewed from four perpendicular directions. **e**, Final 3D reconstruction superimposed with the fitted model, viewed from four perpendicular directions. **f**, FSC analyses of the final map resolution using two methods: map-map FSC, where each map is reconstructed from one half of the images (even vs. odd tilt angle indices), and map-model FSC, where the model map is generated from the fitted model. Resolution assessments are provided based on tilt-based map-map and map-model FSC analyses at thresholds of FSC=0.5 and 0.143, respectively.

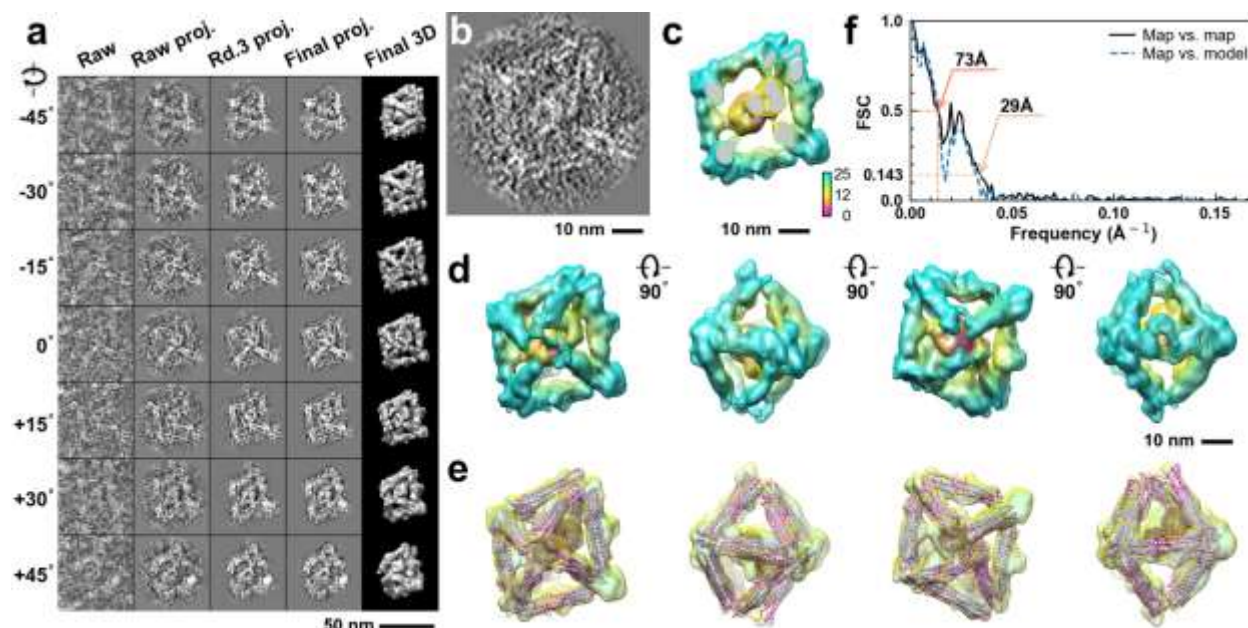

**Supplementary Fig. 143: IPET 3D reconstruction and model fitting of an individual unit-cell particle (Index: 135) within a 2D lattice with 100% ferritin loading.** **a**, Seven representative tilt images of a single unit-cell particle are shown in the first column (from left). The tilt images are aligned to a common center using IPET through iterative refinement. The projections of the raw, intermediate, and final 3D reconstruction at the corresponding angles are displayed in the subsequent four columns. **b**, A central cross-section (~23 nm thick) of the final reconstruction before masking is applied. **c**, 3D views of the central cross-section. **d**, Final 3D density map of this particle, viewed from four perpendicular directions. **e**, Final 3D reconstruction superimposed with the fitted model, viewed from four perpendicular directions. **f**, FSC analyses of the final map resolution using two methods: map-map FSC, where each map is reconstructed from one half of the images (even vs. odd tilt angle indices), and map-model FSC, where the model map is generated from the fitted model. Resolution assessments are provided based on tilt-based map-map and map-model FSC analyses at thresholds of FSC=0.5 and 0.143, respectively.

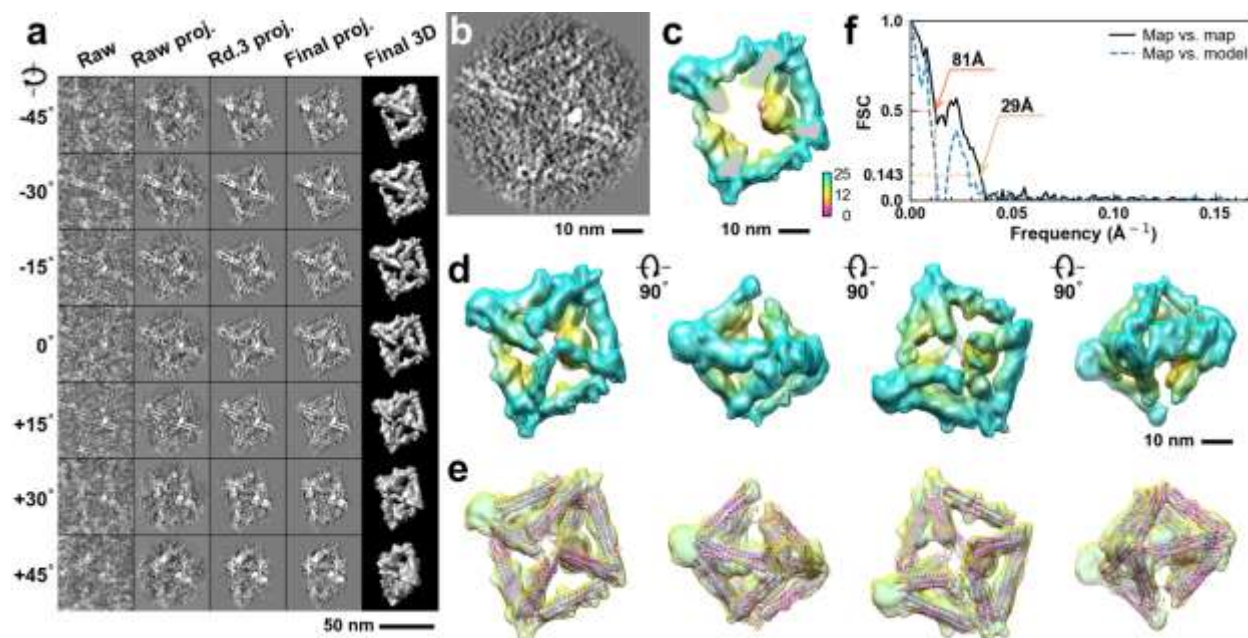

**Supplementary Fig. 144: IPET 3D reconstruction and model fitting of an individual unit-cell particle (Index: 136) within a 2D lattice with 100% ferritin loading.** **a**, Seven representative tilt images of a single unit-cell particle are shown in the first column (from left). The tilt images are aligned to a common center using IPET through iterative refinement. The projections of the raw, intermediate, and final 3D reconstruction at the corresponding angles are displayed in the subsequent four columns. **b**, A central cross-section (~23 nm thick) of the final reconstruction before masking is applied. **c**, 3D views of the central cross-section. **d**, Final 3D density map of this particle, viewed from four perpendicular directions. **e**, Final 3D reconstruction superimposed with the fitted model, viewed from four perpendicular directions. **f**, FSC analyses of the final map resolution using two methods: map-map FSC, where each map is reconstructed from one half of the images (even vs. odd tilt angle indices), and map-model FSC, where the model map is generated from the fitted model. Resolution assessments are provided based on tilt-based map-map and map-model FSC analyses at thresholds of FSC=0.5 and 0.143, respectively.

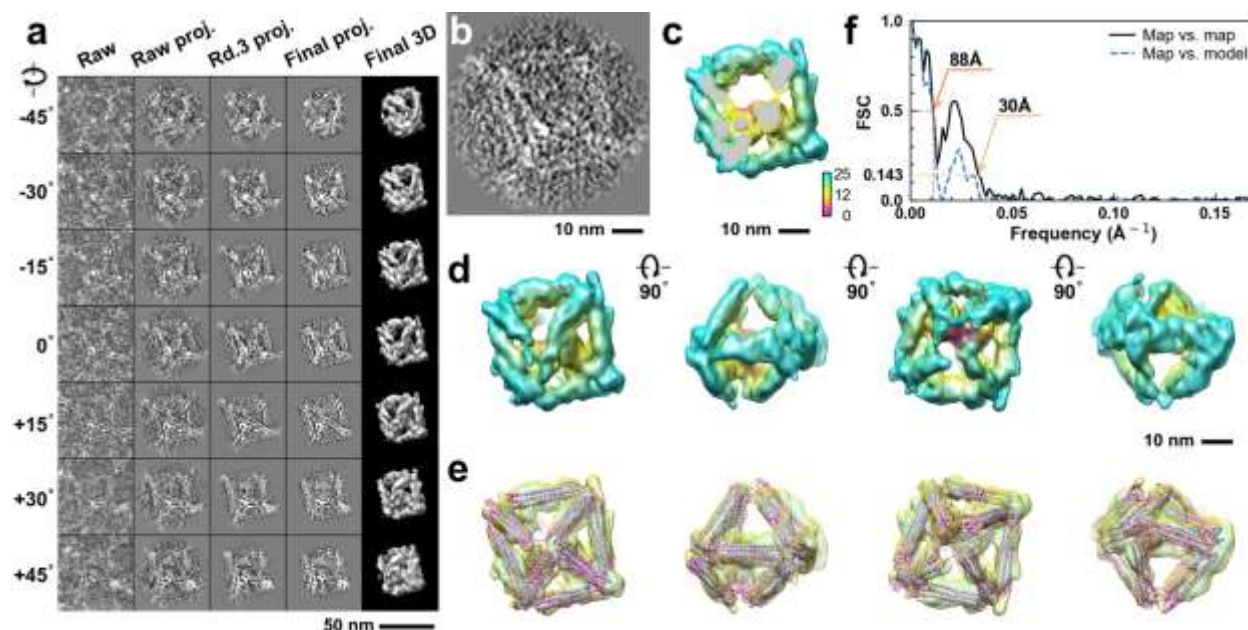

**Supplementary Fig. 145: IPET 3D reconstruction and model fitting of an individual unit-cell particle (Index: 137) within a 2D lattice with 100% ferritin loading.** **a**, Seven representative tilt images of a single unit-cell particle are shown in the first column (from left). The tilt images are aligned to a common center using IPET through iterative refinement. The projections of the raw, intermediate, and final 3D reconstruction at the corresponding angles are displayed in the subsequent four columns. **b**, A central cross-section (~23 nm thick) of the final reconstruction before masking is applied. **c**, 3D views of the central cross-section. **d**, Final 3D density map of this particle, viewed from four perpendicular directions. **e**, Final 3D reconstruction superimposed with the fitted model, viewed from four perpendicular directions. **f**, FSC analyses of the final map resolution using two methods: map-map FSC, where each map is reconstructed from one half of the images (even vs. odd tilt angle indices), and map-model FSC, where the model map is generated from the fitted model. Resolution assessments are provided based on tilt-based map-map and map-model FSC analyses at thresholds of FSC=0.5 and 0.143, respectively.



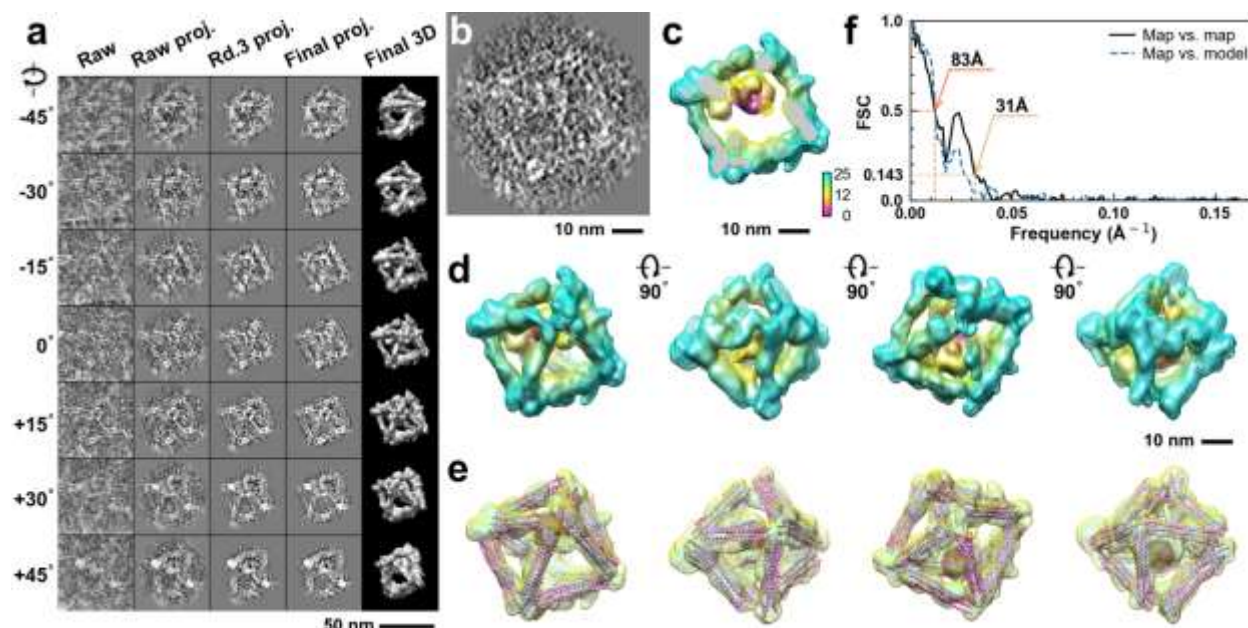

**Supplementary Fig. 146: IPET 3D reconstruction and model fitting of an individual unit-cell particle (Index: 138) within a 2D lattice with 100% ferritin loading.** **a**, Seven representative tilt images of a single unit-cell particle are shown in the first column (from left). The tilt images are aligned to a common center using IPET through iterative refinement. The projections of the raw, intermediate, and final 3D reconstruction at the corresponding angles are displayed in the subsequent four columns. **b**, A central cross-section (~23 nm thick) of the final reconstruction before masking is applied. **c**, 3D views of the central cross-section. **d**, Final 3D density map of this particle, viewed from four perpendicular directions. **e**, Final 3D reconstruction superimposed with the fitted model, viewed from four perpendicular directions. **f**, FSC analyses of the final map resolution using two methods: map-map FSC, where each map is reconstructed from one half of the images (even vs. odd tilt angle indices), and map-model FSC, where the model map is generated from the fitted model. Resolution assessments are provided based on tilt-based map-map and map-model FSC analyses at thresholds of FSC=0.5 and 0.143, respectively.

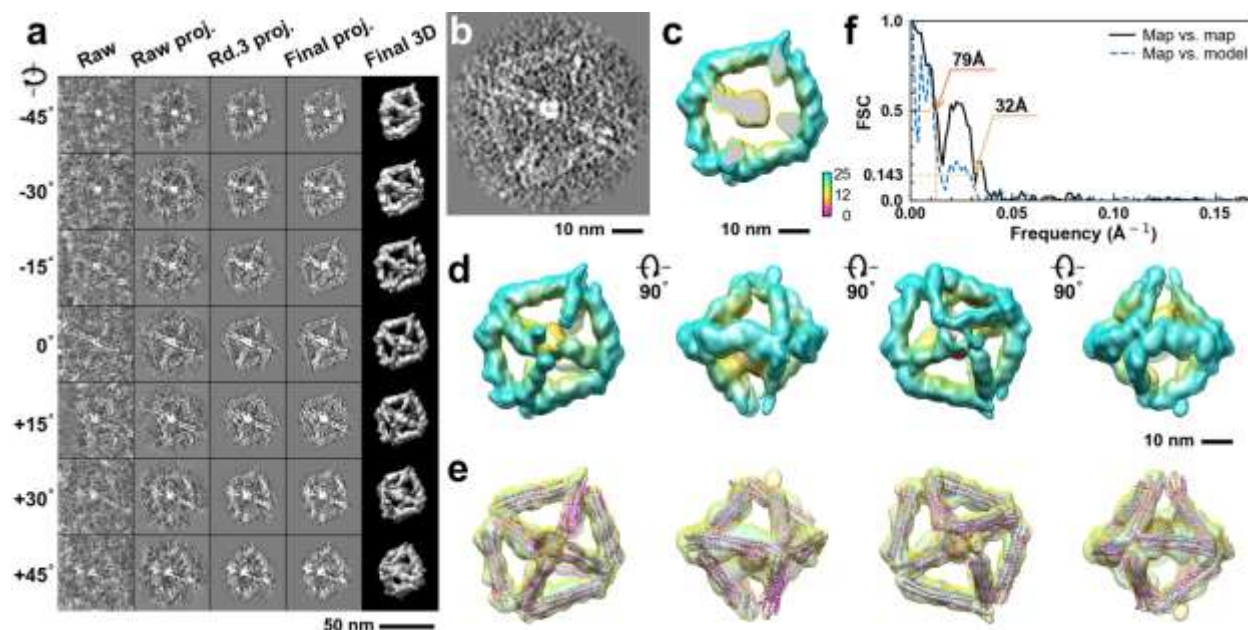

**Supplementary Fig. 147: IPET 3D reconstruction and model fitting of an individual unit-cell particle (Index: 139) within a 2D lattice with 100% ferritin loading.** **a**, Seven representative tilt images of a single unit-cell particle are shown in the first column (from left). The tilt images are aligned to a common center using IPET through iterative refinement. The projections of the raw, intermediate, and final 3D reconstruction at the corresponding angles are displayed in the subsequent four columns. **b**, A central cross-section (~23 nm thick) of the final reconstruction before masking is applied. **c**, 3D views of the central cross-section. **d**, Final 3D density map of this particle, viewed from four perpendicular directions. **e**, Final 3D reconstruction superimposed with the fitted model, viewed from four perpendicular directions. **f**, FSC analyses of the final map resolution using two methods: map-map FSC, where each map is reconstructed from one half of the images (even vs. odd tilt angle indices), and map-model FSC, where the model map is generated from the fitted model. Resolution assessments are provided based on tilt-based map-map and map-model FSC analyses at thresholds of FSC=0.5 and 0.143, respectively.

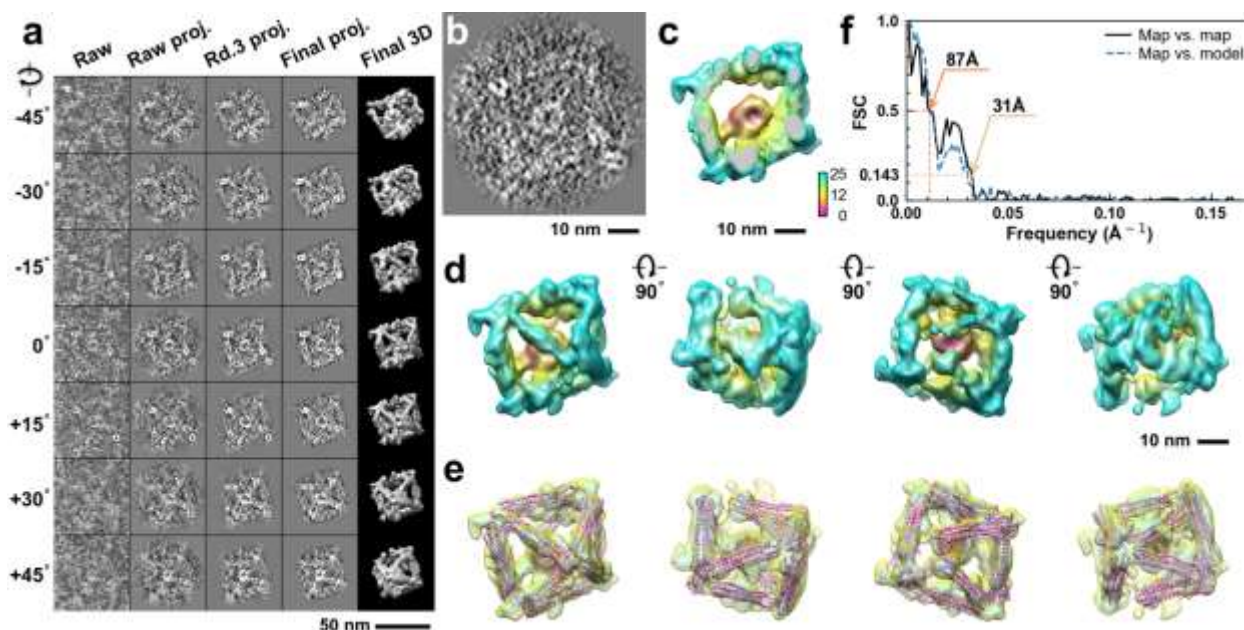

**Supplementary Fig. 148: IPET 3D reconstruction and model fitting of an individual unit-cell particle (Index: 140) within a 2D lattice with 100% ferritin loading.** **a**, Seven representative tilt images of a single unit-cell particle are shown in the first column (from left). The tilt images are aligned to a common center using IPET through iterative refinement. The projections of the raw, intermediate, and final 3D reconstruction at the corresponding angles are displayed in the subsequent four columns. **b**, A central cross-section (~23 nm thick) of the final reconstruction before masking is applied. **c**, 3D views of the central cross-section. **d**, Final 3D density map of this particle, viewed from four perpendicular directions. **e**, Final 3D reconstruction superimposed with the fitted model, viewed from four perpendicular directions. **f**, FSC analyses of the final map resolution using two methods: map-map FSC, where each map is reconstructed from one half of the images (even vs. odd tilt angle indices), and map-model FSC, where the model map is generated from the fitted model. Resolution assessments are provided based on tilt-based map-map and map-model FSC analyses at thresholds of FSC=0.5 and 0.143, respectively.

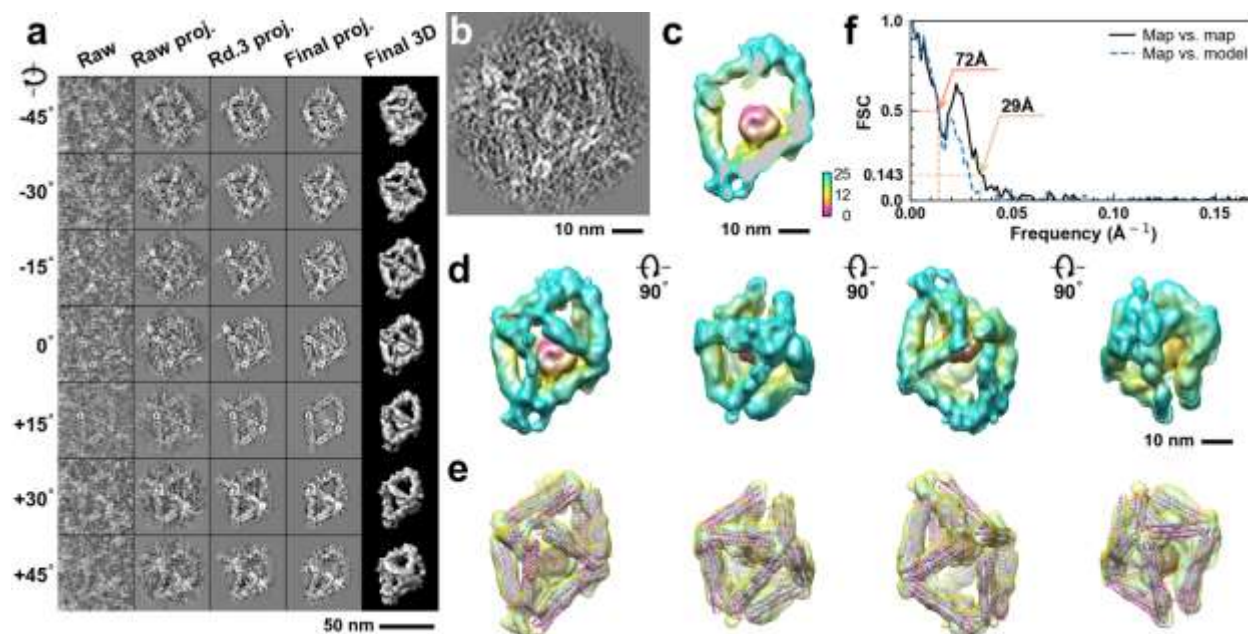

**Supplementary Fig. 149: IPET 3D reconstruction and model fitting of an individual unit-cell particle (Index: 141) within a 2D lattice with 100% ferritin loading.** **a**, Seven representative tilt images of a single unit-cell particle are shown in the first column (from left). The tilt images are aligned to a common center using IPET through iterative refinement. The projections of the raw, intermediate, and final 3D reconstruction at the corresponding angles are displayed in the subsequent four columns. **b**, A central cross-section (~23 nm thick) of the final reconstruction before masking is applied. **c**, 3D views of the central cross-section. **d**, Final 3D density map of this particle, viewed from four perpendicular directions. **e**, Final 3D reconstruction superimposed with the fitted model, viewed from four perpendicular directions. **f**, FSC analyses of the final map resolution using two methods: map-map FSC, where each map is reconstructed from one half of the images (even vs. odd tilt angle indices), and map-model FSC, where the model map is generated from the fitted model. Resolution assessments are provided based on tilt-based map-map and map-model FSC analyses at thresholds of FSC=0.5 and 0.143, respectively.



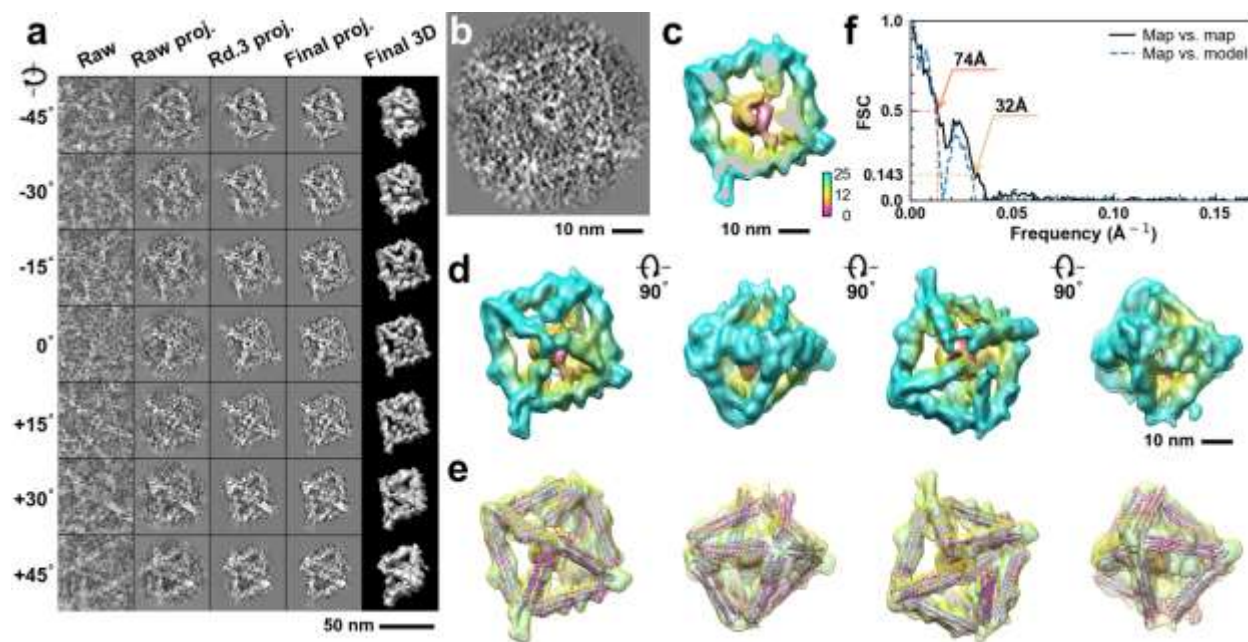

**Supplementary Fig. 150: IPET 3D reconstruction and model fitting of an individual unit-cell particle (Index: 142) within a 2D lattice with 100% ferritin loading.** **a**, Seven representative tilt images of a single unit-cell particle are shown in the first column (from left). The tilt images are aligned to a common center using IPET through iterative refinement. The projections of the raw, intermediate, and final 3D reconstruction at the corresponding angles are displayed in the subsequent four columns. **b**, A central cross-section (~23 nm thick) of the final reconstruction before masking is applied. **c**, 3D views of the central cross-section. **d**, Final 3D density map of this particle, viewed from four perpendicular directions. **e**, Final 3D reconstruction superimposed with the fitted model, viewed from four perpendicular directions. **f**, FSC analyses of the final map resolution using two methods: map-map FSC, where each map is reconstructed from one half of the images (even vs. odd tilt angle indices), and map-model FSC, where the model map is generated from the fitted model. Resolution assessments are provided based on tilt-based map-map and map-model FSC analyses at thresholds of FSC=0.5 and 0.143, respectively.

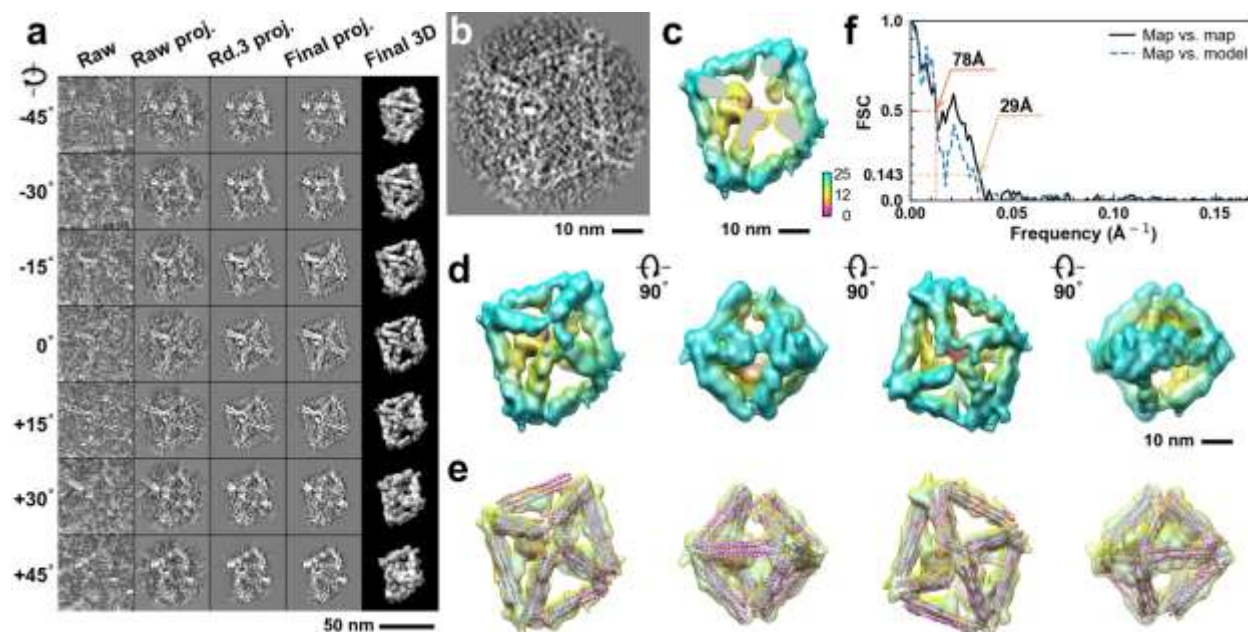

**Supplementary Fig. 151: IPET 3D reconstruction and model fitting of an individual unit-cell particle (Index: 143) within a 2D lattice with 100% ferritin loading.** **a**, Seven representative tilt images of a single unit-cell particle are shown in the first column (from left). The tilt images are aligned to a common center using IPET through iterative refinement. The projections of the raw, intermediate, and final 3D reconstruction at the corresponding angles are displayed in the subsequent four columns. **b**, A central cross-section (~23 nm thick) of the final reconstruction before masking is applied. **c**, 3D views of the central cross-section. **d**, Final 3D density map of this particle, viewed from four perpendicular directions. **e**, Final 3D reconstruction superimposed with the fitted model, viewed from four perpendicular directions. **f**, FSC analyses of the final map resolution using two methods: map-map FSC, where each map is reconstructed from one half of the images (even vs. odd tilt angle indices), and map-model FSC, where the model map is generated from the fitted model. Resolution assessments are provided based on tilt-based map-map and map-model FSC analyses at thresholds of FSC=0.5 and 0.143, respectively.

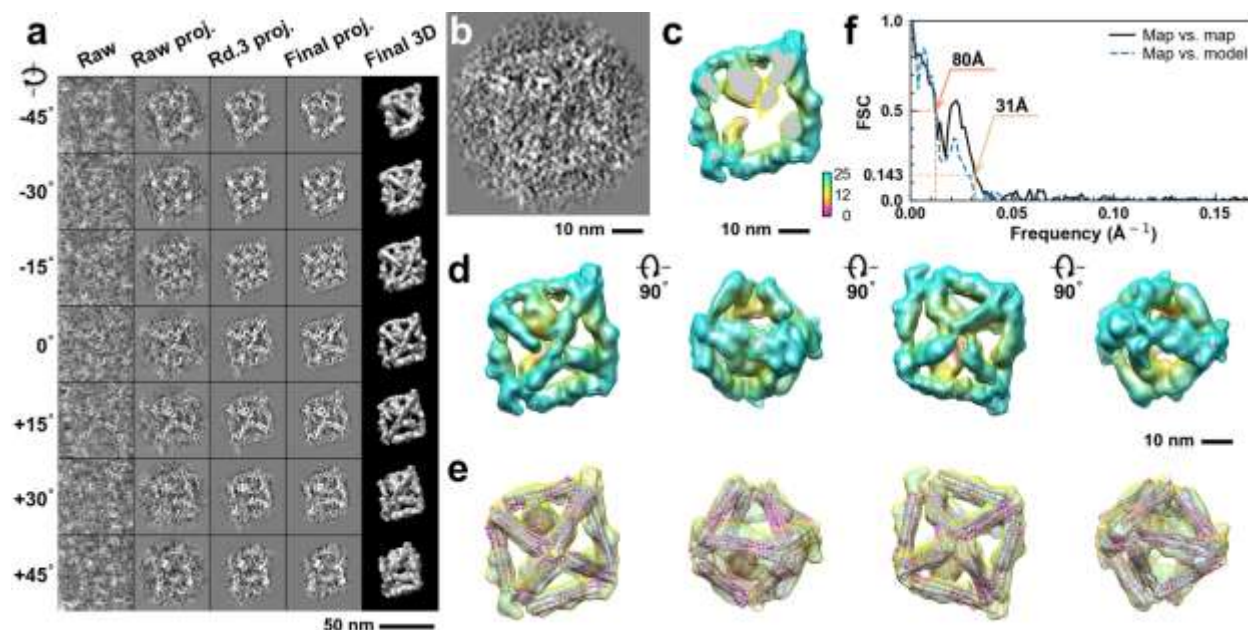

**Supplementary Fig. 152: IPET 3D reconstruction and model fitting of an individual unit-cell particle (Index: 144) within a 2D lattice with 100% ferritin loading.** **a**, Seven representative tilt images of a single unit-cell particle are shown in the first column (from left). The tilt images are aligned to a common center using IPET through iterative refinement. The projections of the raw, intermediate, and final 3D reconstruction at the corresponding angles are displayed in the subsequent four columns. **b**, A central cross-section (~23 nm thick) of the final reconstruction before masking is applied. **c**, 3D views of the central cross-section. **d**, Final 3D density map of this particle, viewed from four perpendicular directions. **e**, Final 3D reconstruction superimposed with the fitted model, viewed from four perpendicular directions. **f**, FSC analyses of the final map resolution using two methods: map-map FSC, where each map is reconstructed from one half of the images (even vs. odd tilt angle indices), and map-model FSC, where the model map is generated from the fitted model. Resolution assessments are provided based on tilt-based map-map and map-model FSC analyses at thresholds of FSC=0.5 and 0.143, respectively.

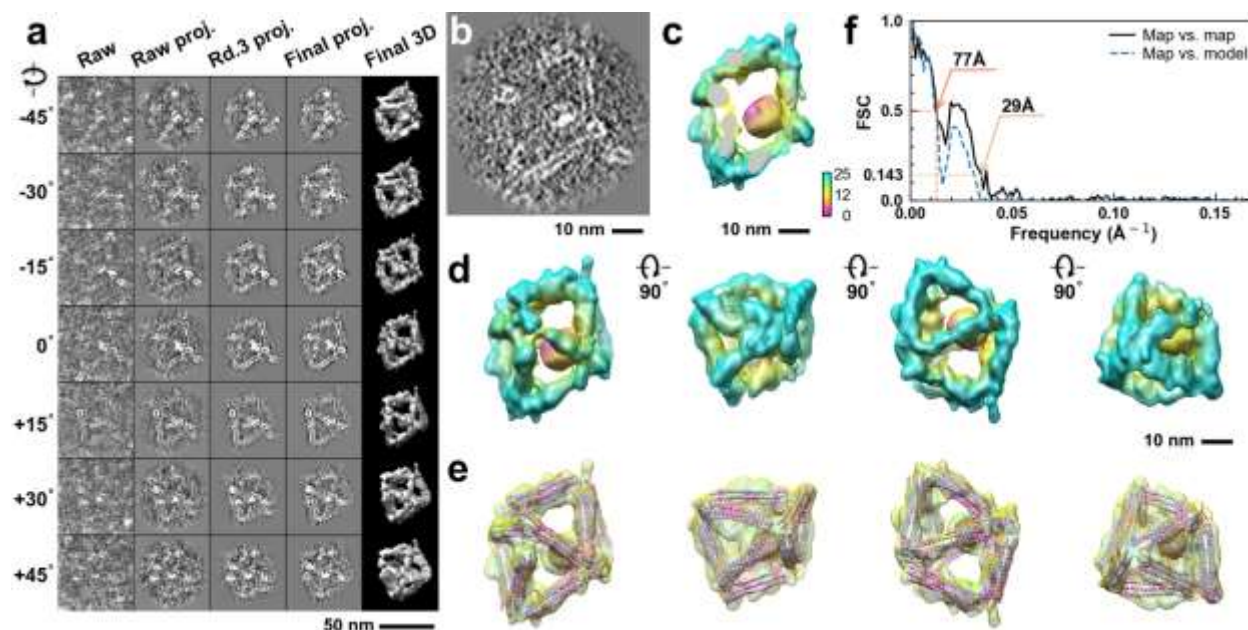

**Supplementary Fig. 153: IPET 3D reconstruction and model fitting of an individual unit-cell particle (Index: 145) within a 2D lattice with 100% ferritin loading.** **a**, Seven representative tilt images of a single unit-cell particle are shown in the first column (from left). The tilt images are aligned to a common center using IPET through iterative refinement. The projections of the raw, intermediate, and final 3D reconstruction at the corresponding angles are displayed in the subsequent four columns. **b**, A central cross-section (~23 nm thick) of the final reconstruction before masking is applied. **c**, 3D views of the central cross-section. **d**, Final 3D density map of this particle, viewed from four perpendicular directions. **e**, Final 3D reconstruction superimposed with the fitted model, viewed from four perpendicular directions. **f**, FSC analyses of the final map resolution using two methods: map-map FSC, where each map is reconstructed from one half of the images (even vs. odd tilt angle indices), and map-model FSC, where the model map is generated from the fitted model. Resolution assessments are provided based on tilt-based map-map and map-model FSC analyses at thresholds of FSC=0.5 and 0.143, respectively.



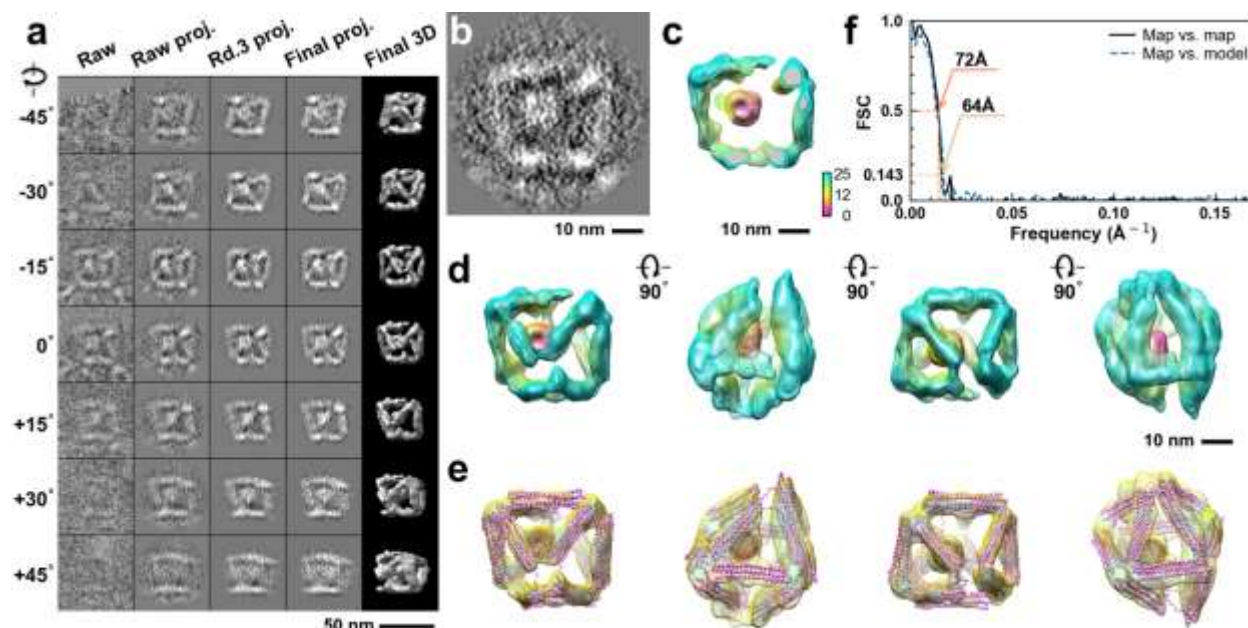

**Supplementary Fig. 154: IPET 3D reconstruction and model fitting of an individual unit-cell particle (Index: 146) within a 2D lattice with 70% ferritin loading.** **a**, Seven representative tilt images of a single unit-cell particle are shown in the first column (from left). The tilt images are aligned to a common center using IPET through iterative refinement. The projections of the raw, intermediate, and final 3D reconstruction at the corresponding angles are displayed in the subsequent four columns. **b**, A central cross-section (~23 nm thick) of the final reconstruction before masking is applied. **c**, 3D views of the central cross-section. **d**, Final 3D density map of this particle, viewed from four perpendicular directions. **e**, Final 3D reconstruction superimposed with the fitted model, viewed from four perpendicular directions. **f**, FSC analyses of the final map resolution using two methods: map-map FSC, where each map is reconstructed from one half of the images (even vs. odd tilt angle indices), and map-model FSC, where the model map is generated from the fitted model. Resolution assessments are provided based on tilt-based map-map and map-model FSC analyses at thresholds of FSC=0.5 and 0.143, respectively.

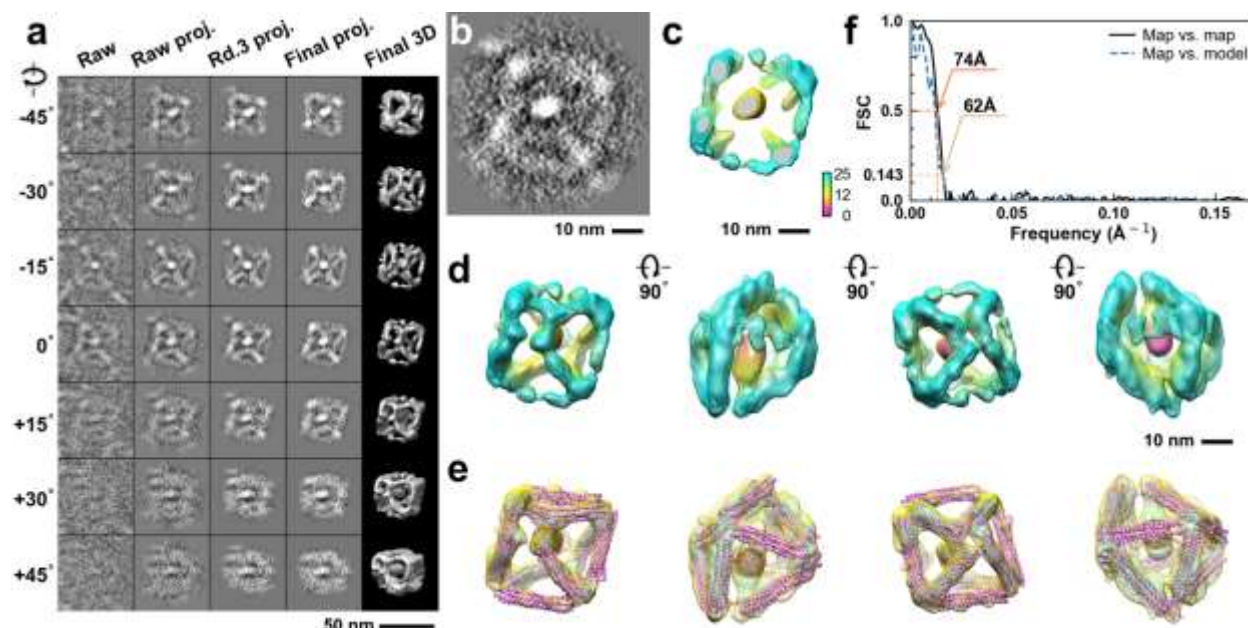

**Supplementary Fig. 155: IPET 3D reconstruction and model fitting of an individual unit-cell particle (Index: 147) within a 2D lattice with 70% ferritin loading.** **a**, Seven representative tilt images of a single unit-cell particle are shown in the first column (from left). The tilt images are aligned to a common center using IPET through iterative refinement. The projections of the raw, intermediate, and final 3D reconstruction at the corresponding angles are displayed in the subsequent four columns. **b**, A central cross-section (~23 nm thick) of the final reconstruction before masking is applied. **c**, 3D views of the central cross-section. **d**, Final 3D density map of this particle, viewed from four perpendicular directions. **e**, Final 3D reconstruction superimposed with the fitted model, viewed from four perpendicular directions. **f**, FSC analyses of the final map resolution using two methods: map-map FSC, where each map is reconstructed from one half of the images (even vs. odd tilt angle indices), and map-model FSC, where the model map is generated from the fitted model. Resolution assessments are provided based on tilt-based map-map and map-model FSC analyses at thresholds of FSC=0.5 and 0.143, respectively.

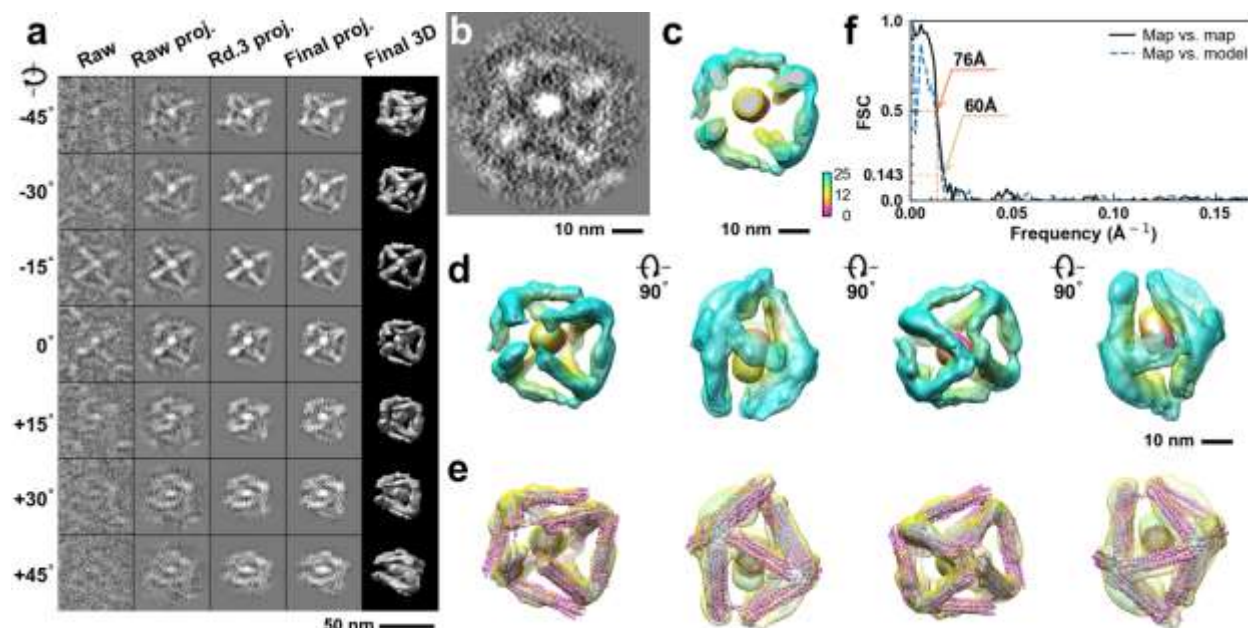

**Supplementary Fig. 156: IPET 3D reconstruction and model fitting of an individual unit-cell particle (Index: 148) within a 2D lattice with 70% ferritin loading.** **a**, Seven representative tilt images of a single unit-cell particle are shown in the first column (from left). The tilt images are aligned to a common center using IPET through iterative refinement. The projections of the raw, intermediate, and final 3D reconstruction at the corresponding angles are displayed in the subsequent four columns. **b**, A central cross-section (~23 nm thick) of the final reconstruction before masking is applied. **c**, 3D views of the central cross-section. **d**, Final 3D density map of this particle, viewed from four perpendicular directions. **e**, Final 3D reconstruction superimposed with the fitted model, viewed from four perpendicular directions. **f**, FSC analyses of the final map resolution using two methods: map-map FSC, where each map is reconstructed from one half of the images (even vs. odd tilt angle indices), and map-model FSC, where the model map is generated from the fitted model. Resolution assessments are provided based on tilt-based map-map and map-model FSC analyses at thresholds of FSC=0.5 and 0.143, respectively.

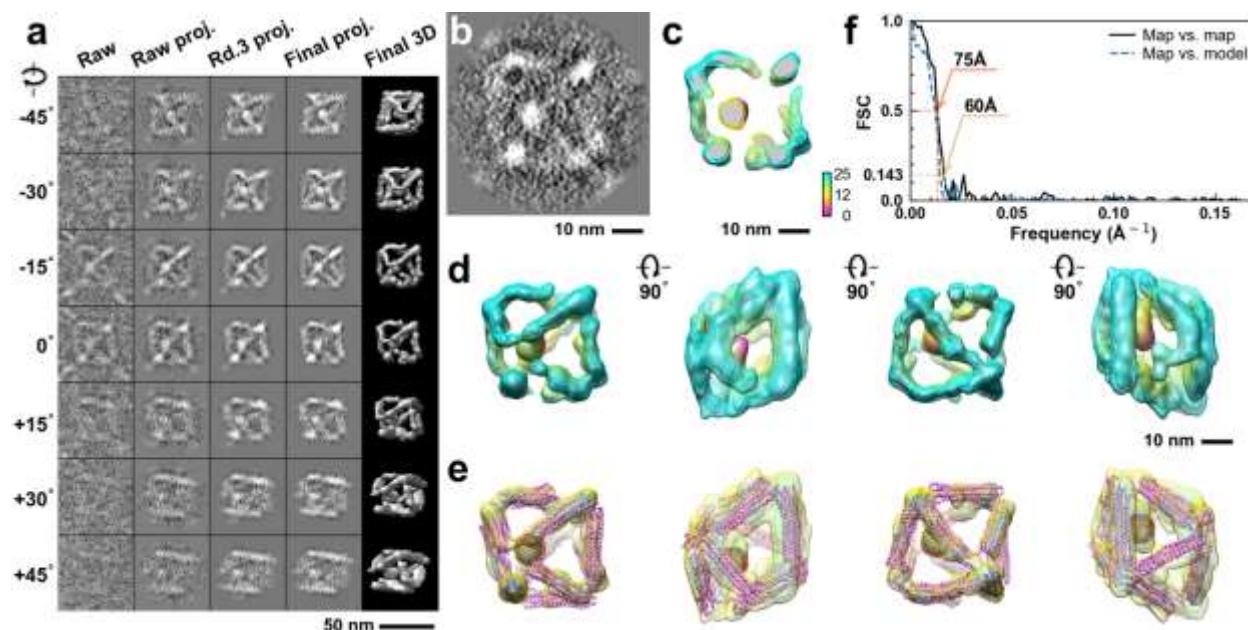

**Supplementary Fig. 157: IPET 3D reconstruction and model fitting of an individual unit-cell particle (Index: 149) within a 2D lattice with 70% ferritin loading.** **a**, Seven representative tilt images of a single unit-cell particle are shown in the first column (from left). The tilt images are aligned to a common center using IPET through iterative refinement. The projections of the raw, intermediate, and final 3D reconstruction at the corresponding angles are displayed in the subsequent four columns. **b**, A central cross-section (~23 nm thick) of the final reconstruction before masking is applied. **c**, 3D views of the central cross-section. **d**, Final 3D density map of this particle, viewed from four perpendicular directions. **e**, Final 3D reconstruction superimposed with the fitted model, viewed from four perpendicular directions. **f**, FSC analyses of the final map resolution using two methods: map-map FSC, where each map is reconstructed from one half of the images (even vs. odd tilt angle indices), and map-model FSC, where the model map is generated from the fitted model. Resolution assessments are provided based on tilt-based map-map and map-model FSC analyses at thresholds of FSC=0.5 and 0.143, respectively.



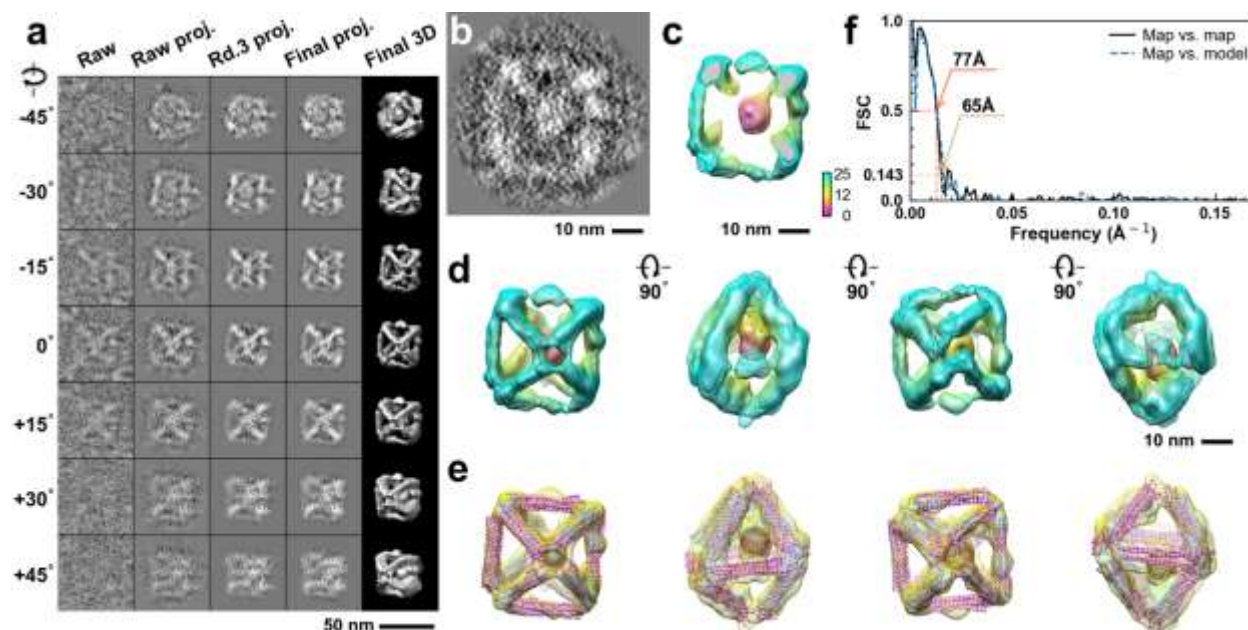

**Supplementary Fig. 158: IPET 3D reconstruction and model fitting of an individual unit-cell particle (Index: 150) within a 2D lattice with 70% ferritin loading.** **a**, Seven representative tilt images of a single unit-cell particle are shown in the first column (from left). The tilt images are aligned to a common center using IPET through iterative refinement. The projections of the raw, intermediate, and final 3D reconstruction at the corresponding angles are displayed in the subsequent four columns. **b**, A central cross-section (~23 nm thick) of the final reconstruction before masking is applied. **c**, 3D views of the central cross-section. **d**, Final 3D density map of this particle, viewed from four perpendicular directions. **e**, Final 3D reconstruction superimposed with the fitted model, viewed from four perpendicular directions. **f**, FSC analyses of the final map resolution using two methods: map-map FSC, where each map is reconstructed from one half of the images (even vs. odd tilt angle indices), and map-model FSC, where the model map is generated from the fitted model. Resolution assessments are provided based on tilt-based map-map and map-model FSC analyses at thresholds of FSC=0.5 and 0.143, respectively.

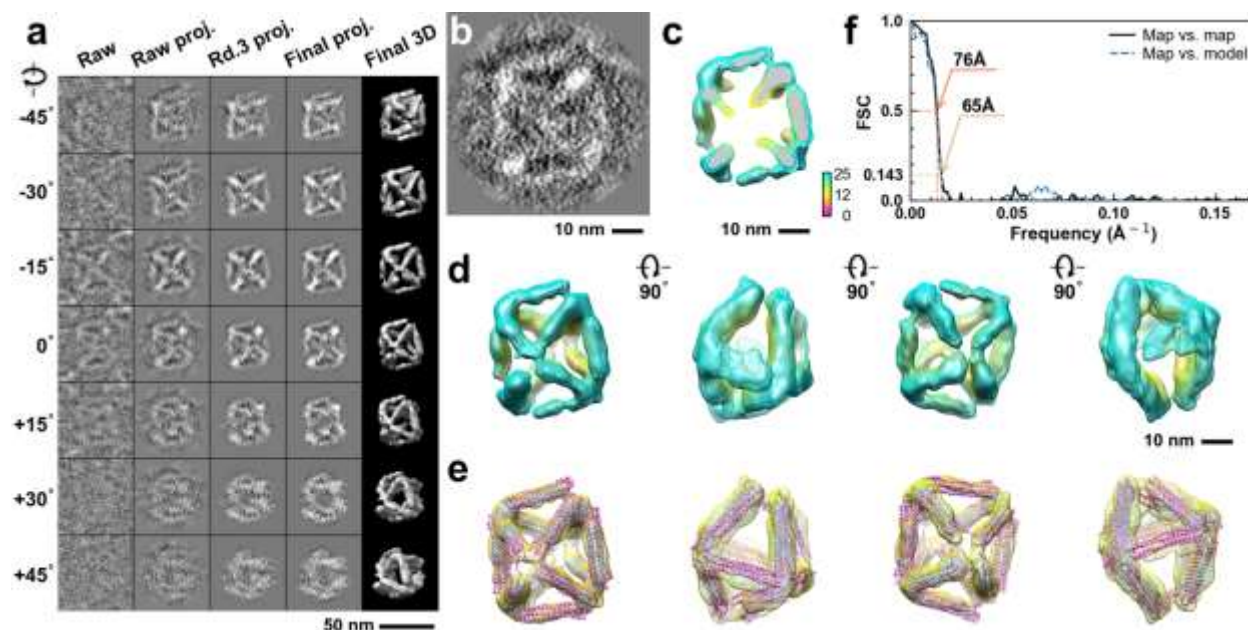

**Supplementary Fig. 159: IPET 3D reconstruction and model fitting of an individual unit-cell particle (Index: 151) within a 2D lattice with 70% ferritin loading.** **a**, Seven representative tilt images of a single unit-cell particle are shown in the first column (from left). The tilt images are aligned to a common center using IPET through iterative refinement. The projections of the raw, intermediate, and final 3D reconstruction at the corresponding angles are displayed in the subsequent four columns. **b**, A central cross-section (~23 nm thick) of the final reconstruction before masking is applied. **c**, 3D views of the central cross-section. **d**, Final 3D density map of this particle, viewed from four perpendicular directions. **e**, Final 3D reconstruction superimposed with the fitted model, viewed from four perpendicular directions. **f**, FSC analyses of the final map resolution using two methods: map-map FSC, where each map is reconstructed from one half of the images (even vs. odd tilt angle indices), and map-model FSC, where the model map is generated from the fitted model. Resolution assessments are provided based on tilt-based map-map and map-model FSC analyses at thresholds of FSC=0.5 and 0.143, respectively.

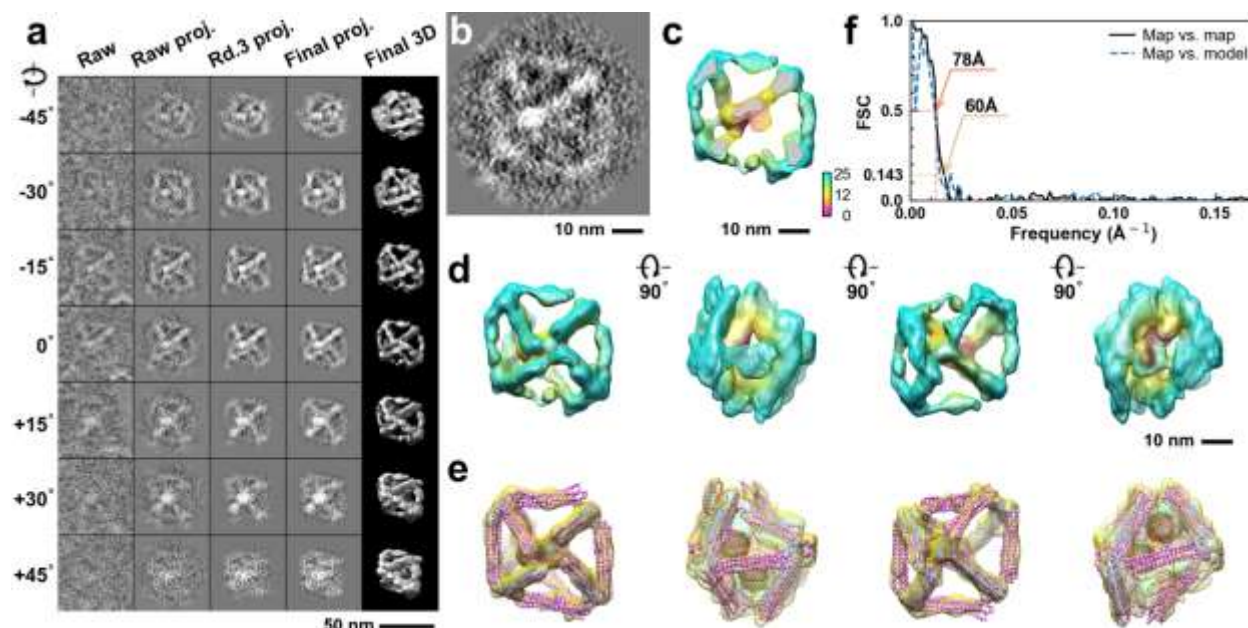

**Supplementary Fig. 160: IPET 3D reconstruction and model fitting of an individual unit-cell particle (Index: 152) within a 2D lattice with 70% ferritin loading.** **a**, Seven representative tilt images of a single unit-cell particle are shown in the first column (from left). The tilt images are aligned to a common center using IPET through iterative refinement. The projections of the raw, intermediate, and final 3D reconstruction at the corresponding angles are displayed in the subsequent four columns. **b**, A central cross-section (~23 nm thick) of the final reconstruction before masking is applied. **c**, 3D views of the central cross-section. **d**, Final 3D density map of this particle, viewed from four perpendicular directions. **e**, Final 3D reconstruction superimposed with the fitted model, viewed from four perpendicular directions. **f**, FSC analyses of the final map resolution using two methods: map-map FSC, where each map is reconstructed from one half of the images (even vs. odd tilt angle indices), and map-model FSC, where the model map is generated from the fitted model. Resolution assessments are provided based on tilt-based map-map and map-model FSC analyses at thresholds of FSC=0.5 and 0.143, respectively.

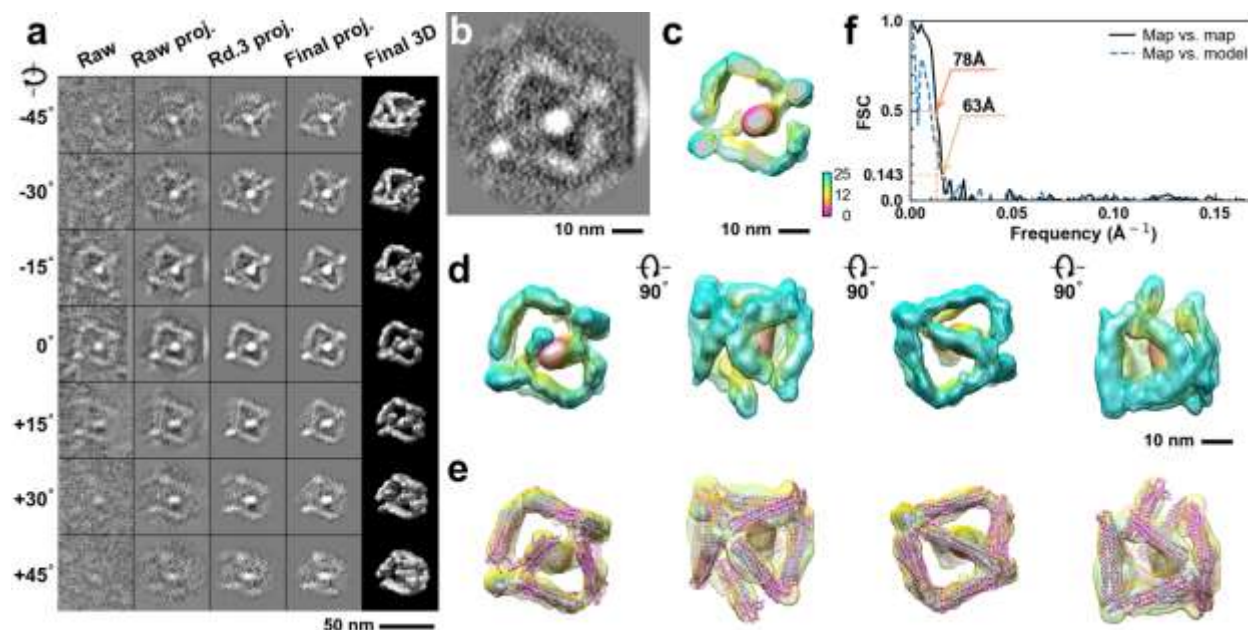

**Supplementary Fig. 161: IPET 3D reconstruction and model fitting of an individual unit-cell particle (Index: 153) within a 2D lattice with 70% ferritin loading.** **a**, Seven representative tilt images of a single unit-cell particle are shown in the first column (from left). The tilt images are aligned to a common center using IPET through iterative refinement. The projections of the raw, intermediate, and final 3D reconstruction at the corresponding angles are displayed in the subsequent four columns. **b**, A central cross-section (~23 nm thick) of the final reconstruction before masking is applied. **c**, 3D views of the central cross-section. **d**, Final 3D density map of this particle, viewed from four perpendicular directions. **e**, Final 3D reconstruction superimposed with the fitted model, viewed from four perpendicular directions. **f**, FSC analyses of the final map resolution using two methods: map-map FSC, where each map is reconstructed from one half of the images (even vs. odd tilt angle indices), and map-model FSC, where the model map is generated from the fitted model. Resolution assessments are provided based on tilt-based map-map and map-model FSC analyses at thresholds of FSC=0.5 and 0.143, respectively.



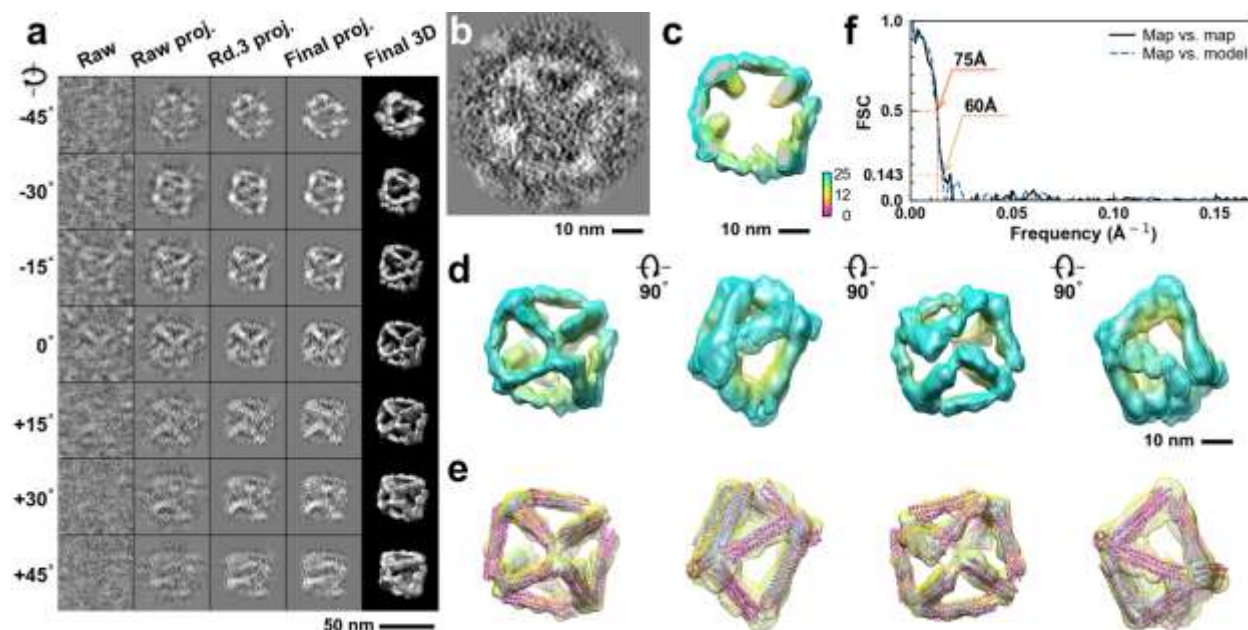

**Supplementary Fig. 162: IPET 3D reconstruction and model fitting of an individual unit-cell particle (Index: 154) within a 2D lattice with 70% ferritin loading.** **a**, Seven representative tilt images of a single unit-cell particle are shown in the first column (from left). The tilt images are aligned to a common center using IPET through iterative refinement. The projections of the raw, intermediate, and final 3D reconstruction at the corresponding angles are displayed in the subsequent four columns. **b**, A central cross-section (~23 nm thick) of the final reconstruction before masking is applied. **c**, 3D views of the central cross-section. **d**, Final 3D density map of this particle, viewed from four perpendicular directions. **e**, Final 3D reconstruction superimposed with the fitted model, viewed from four perpendicular directions. **f**, FSC analyses of the final map resolution using two methods: map-map FSC, where each map is reconstructed from one half of the images (even vs. odd tilt angle indices), and map-model FSC, where the model map is generated from the fitted model. Resolution assessments are provided based on tilt-based map-map and map-model FSC analyses at thresholds of FSC=0.5 and 0.143, respectively.

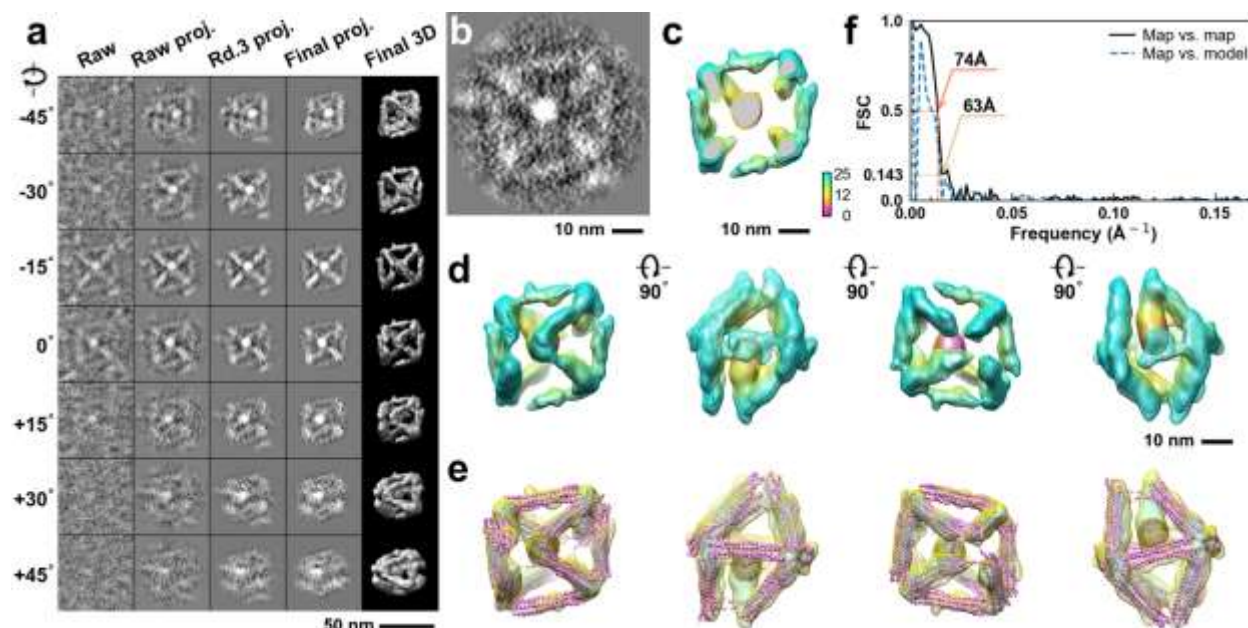

**Supplementary Fig. 163: IPET 3D reconstruction and model fitting of an individual unit-cell particle (Index: 155) within a 2D lattice with 70% ferritin loading.** **a**, Seven representative tilt images of a single unit-cell particle are shown in the first column (from left). The tilt images are aligned to a common center using IPET through iterative refinement. The projections of the raw, intermediate, and final 3D reconstruction at the corresponding angles are displayed in the subsequent four columns. **b**, A central cross-section (~23 nm thick) of the final reconstruction before masking is applied. **c**, 3D views of the central cross-section. **d**, Final 3D density map of this particle, viewed from four perpendicular directions. **e**, Final 3D reconstruction superimposed with the fitted model, viewed from four perpendicular directions. **f**, FSC analyses of the final map resolution using two methods: map-map FSC, where each map is reconstructed from one half of the images (even vs. odd tilt angle indices), and map-model FSC, where the model map is generated from the fitted model. Resolution assessments are provided based on tilt-based map-map and map-model FSC analyses at thresholds of FSC=0.5 and 0.143, respectively.

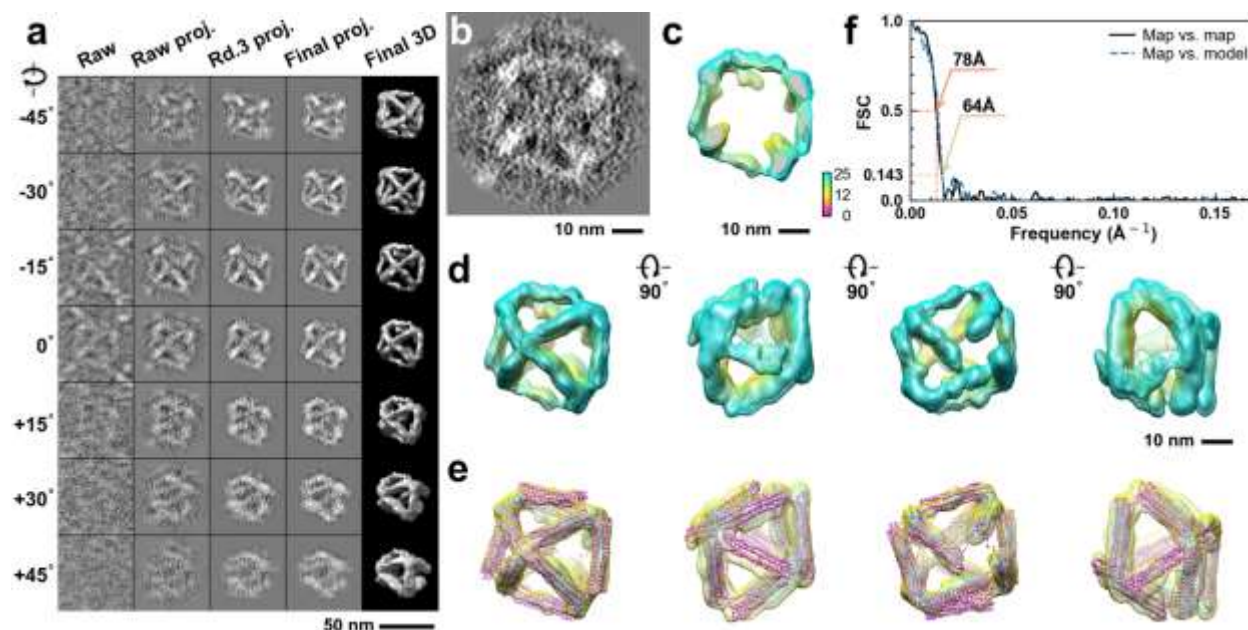

**Supplementary Fig. 164: IPET 3D reconstruction and model fitting of an individual unit-cell particle (Index: 156) within a 2D lattice with 70% ferritin loading.** **a**, Seven representative tilt images of a single unit-cell particle are shown in the first column (from left). The tilt images are aligned to a common center using IPET through iterative refinement. The projections of the raw, intermediate, and final 3D reconstruction at the corresponding angles are displayed in the subsequent four columns. **b**, A central cross-section (~23 nm thick) of the final reconstruction before masking is applied. **c**, 3D views of the central cross-section. **d**, Final 3D density map of this particle, viewed from four perpendicular directions. **e**, Final 3D reconstruction superimposed with the fitted model, viewed from four perpendicular directions. **f**, FSC analyses of the final map resolution using two methods: map-map FSC, where each map is reconstructed from one half of the images (even vs. odd tilt angle indices), and map-model FSC, where the model map is generated from the fitted model. Resolution assessments are provided based on tilt-based map-map and map-model FSC analyses at thresholds of FSC=0.5 and 0.143, respectively.

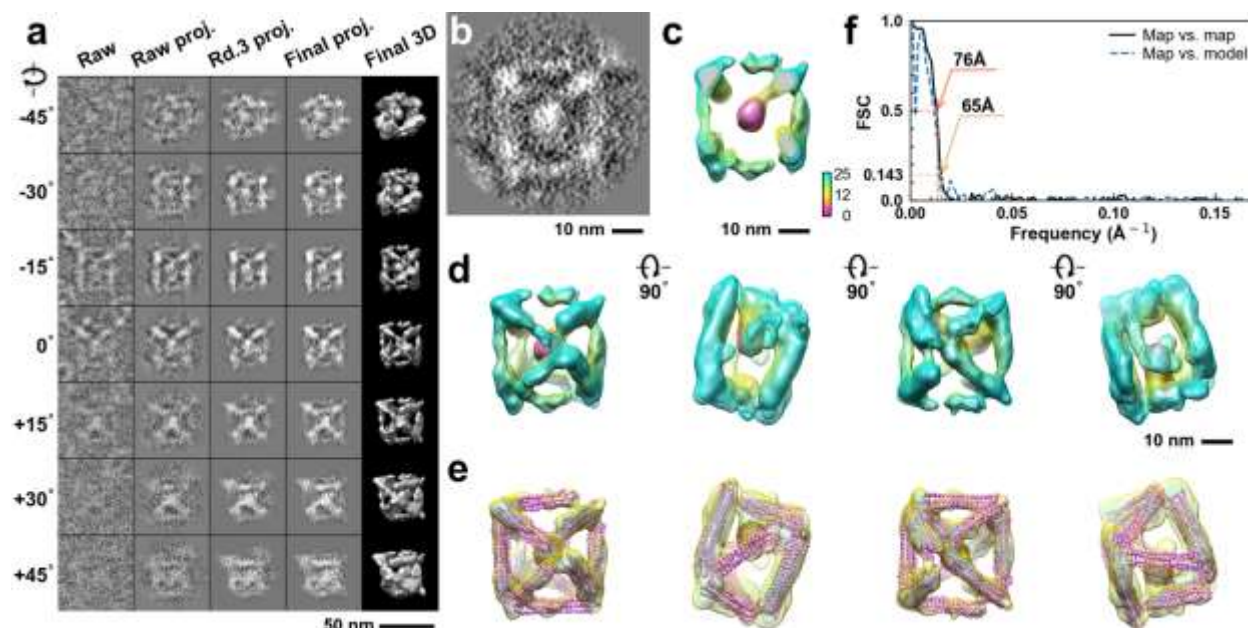

**Supplementary Fig. 165: IPET 3D reconstruction and model fitting of an individual unit-cell particle (Index: 157) within a 2D lattice with 70% ferritin loading.** **a**, Seven representative tilt images of a single unit-cell particle are shown in the first column (from left). The tilt images are aligned to a common center using IPET through iterative refinement. The projections of the raw, intermediate, and final 3D reconstruction at the corresponding angles are displayed in the subsequent four columns. **b**, A central cross-section (~23 nm thick) of the final reconstruction before masking is applied. **c**, 3D views of the central cross-section. **d**, Final 3D density map of this particle, viewed from four perpendicular directions. **e**, Final 3D reconstruction superimposed with the fitted model, viewed from four perpendicular directions. **f**, FSC analyses of the final map resolution using two methods: map-map FSC, where each map is reconstructed from one half of the images (even vs. odd tilt angle indices), and map-model FSC, where the model map is generated from the fitted model. Resolution assessments are provided based on tilt-based map-map and map-model FSC analyses at thresholds of FSC=0.5 and 0.143, respectively.



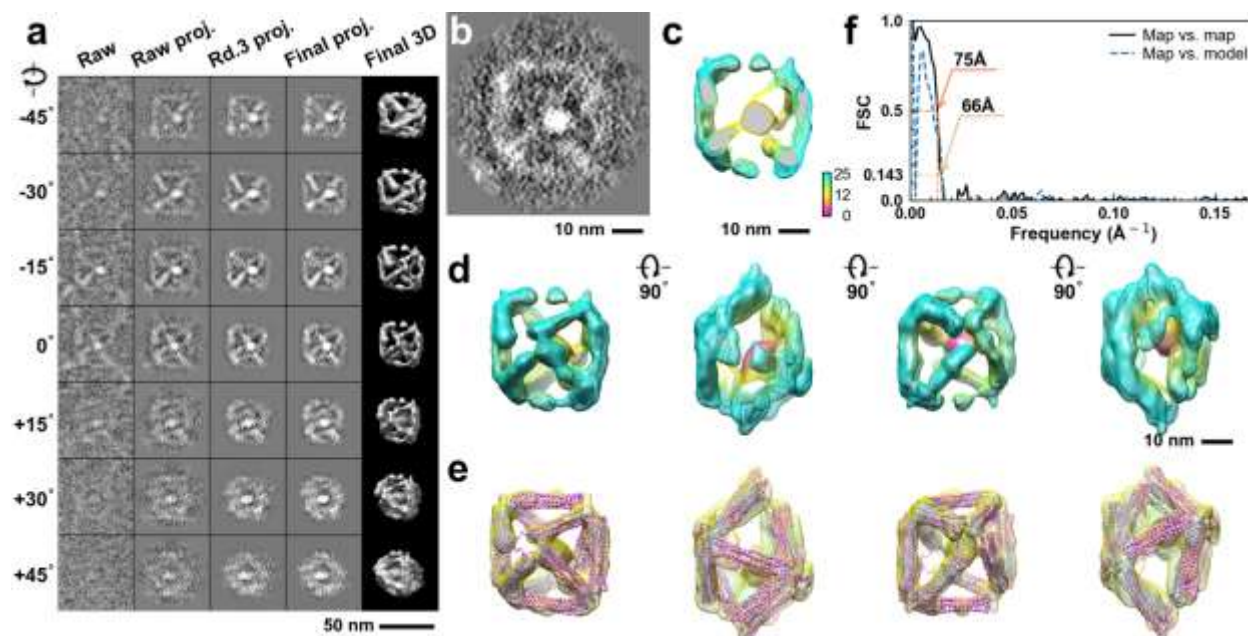

**Supplementary Fig. 166: IPET 3D reconstruction and model fitting of an individual unit-cell particle (Index: 158) within a 2D lattice with 70% ferritin loading.** **a**, Seven representative tilt images of a single unit-cell particle are shown in the first column (from left). The tilt images are aligned to a common center using IPET through iterative refinement. The projections of the raw, intermediate, and final 3D reconstruction at the corresponding angles are displayed in the subsequent four columns. **b**, A central cross-section (~23 nm thick) of the final reconstruction before masking is applied. **c**, 3D views of the central cross-section. **d**, Final 3D density map of this particle, viewed from four perpendicular directions. **e**, Final 3D reconstruction superimposed with the fitted model, viewed from four perpendicular directions. **f**, FSC analyses of the final map resolution using two methods: map-map FSC, where each map is reconstructed from one half of the images (even vs. odd tilt angle indices), and map-model FSC, where the model map is generated from the fitted model. Resolution assessments are provided based on tilt-based map-map and map-model FSC analyses at thresholds of FSC=0.5 and 0.143, respectively.

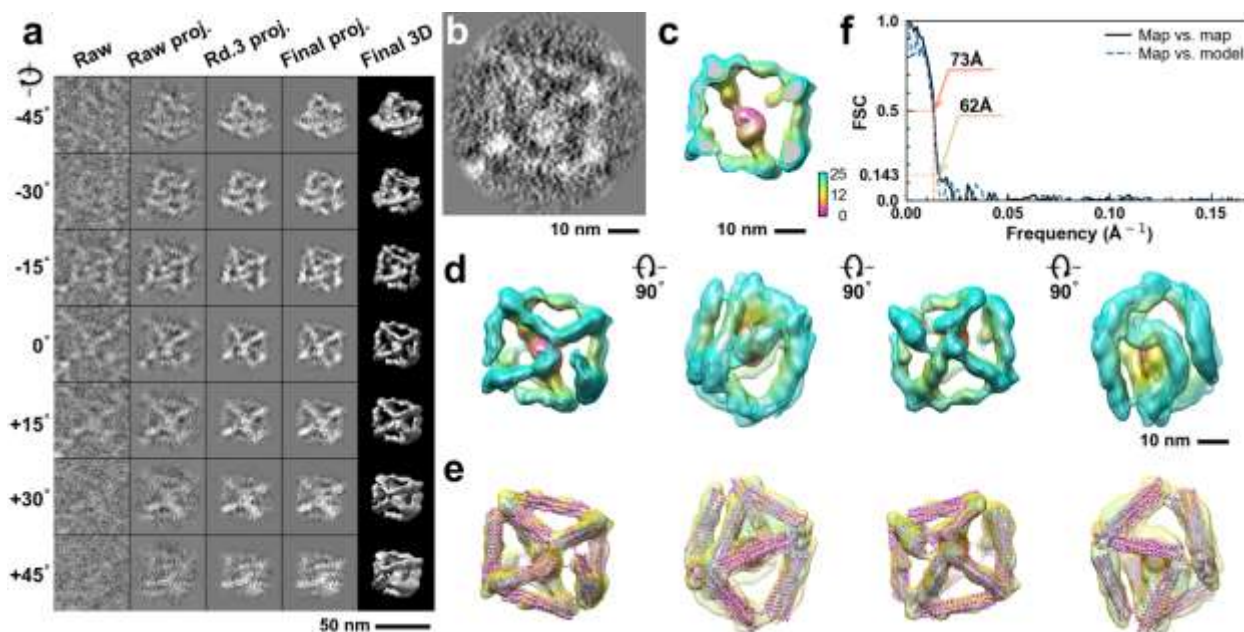

**Supplementary Fig. 167: IPET 3D reconstruction and model fitting of an individual unit-cell particle (Index: 159) within a 2D lattice with 70% ferritin loading.** **a**, Seven representative tilt images of a single unit-cell particle are shown in the first column (from left). The tilt images are aligned to a common center using IPET through iterative refinement. The projections of the raw, intermediate, and final 3D reconstruction at the corresponding angles are displayed in the subsequent four columns. **b**, A central cross-section (~23 nm thick) of the final reconstruction before masking is applied. **c**, 3D views of the central cross-section. **d**, Final 3D density map of this particle, viewed from four perpendicular directions. **e**, Final 3D reconstruction superimposed with the fitted model, viewed from four perpendicular directions. **f**, FSC analyses of the final map resolution using two methods: map-map FSC, where each map is reconstructed from one half of the images (even vs. odd tilt angle indices), and map-model FSC, where the model map is generated from the fitted model. Resolution assessments are provided based on tilt-based map-map and map-model FSC analyses at thresholds of FSC=0.5 and 0.143, respectively.

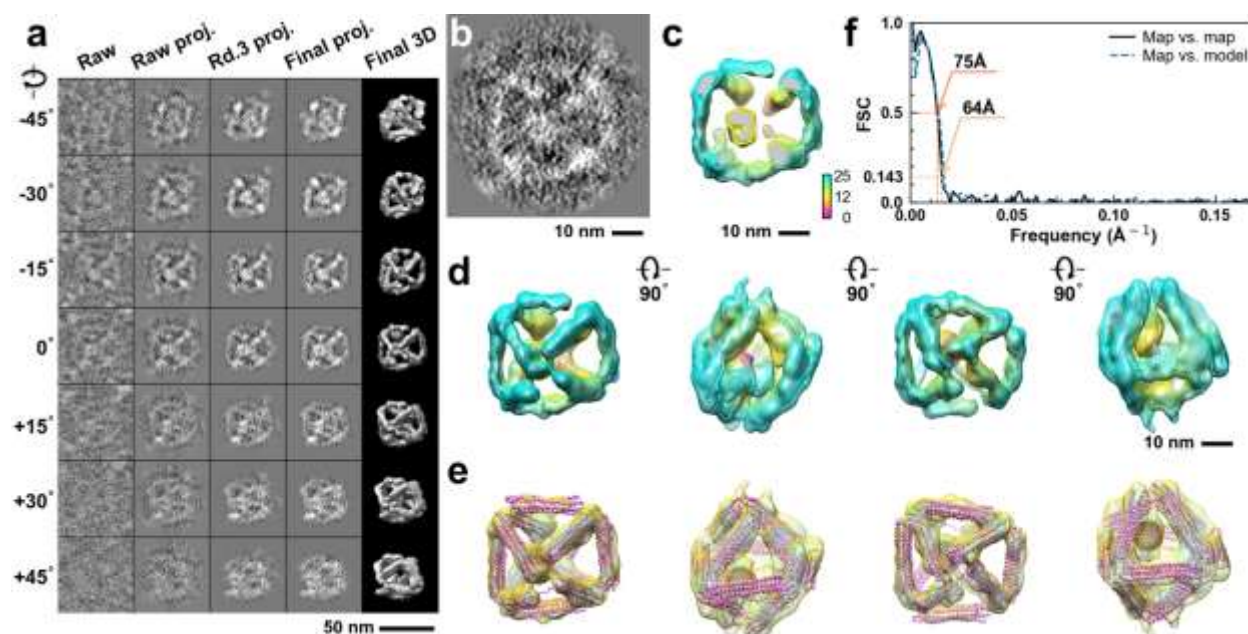

**Supplementary Fig. 168: IPET 3D reconstruction and model fitting of an individual unit-cell particle (Index: 160) within a 2D lattice with 70% ferritin loading.** **a**, Seven representative tilt images of a single unit-cell particle are shown in the first column (from left). The tilt images are aligned to a common center using IPET through iterative refinement. The projections of the raw, intermediate, and final 3D reconstruction at the corresponding angles are displayed in the subsequent four columns. **b**, A central cross-section (~23 nm thick) of the final reconstruction before masking is applied. **c**, 3D views of the central cross-section. **d**, Final 3D density map of this particle, viewed from four perpendicular directions. **e**, Final 3D reconstruction superimposed with the fitted model, viewed from four perpendicular directions. **f**, FSC analyses of the final map resolution using two methods: map-map FSC, where each map is reconstructed from one half of the images (even vs. odd tilt angle indices), and map-model FSC, where the model map is generated from the fitted model. Resolution assessments are provided based on tilt-based map-map and map-model FSC analyses at thresholds of FSC=0.5 and 0.143, respectively.

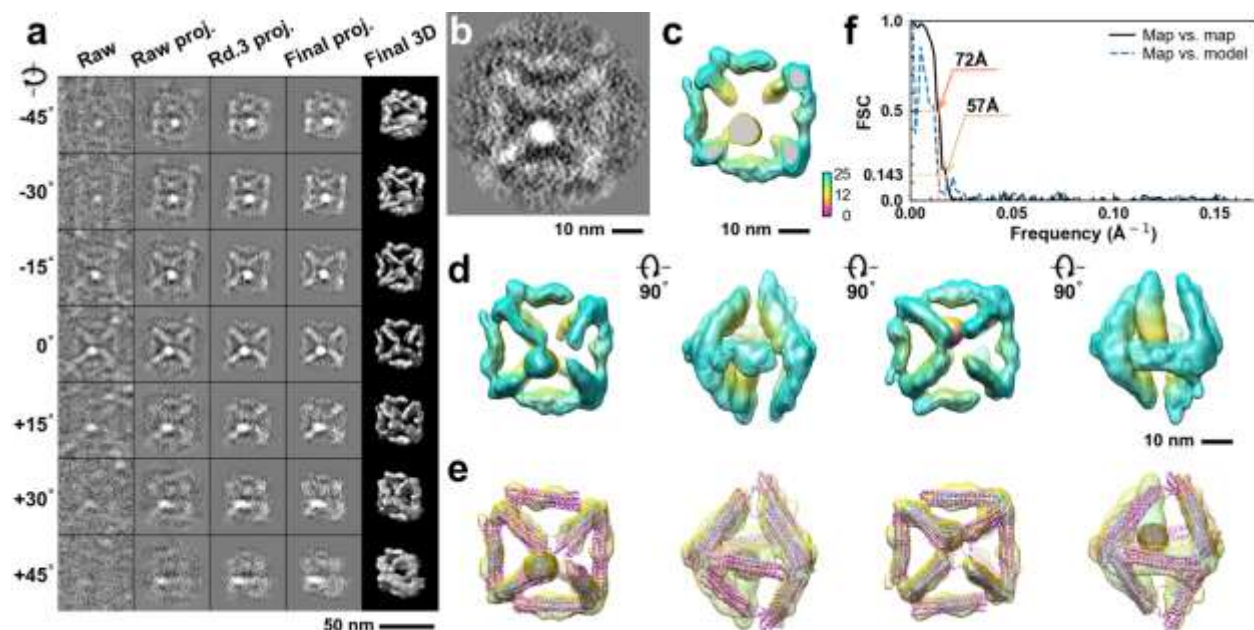

**Supplementary Fig. 169: IPET 3D reconstruction and model fitting of an individual unit-cell particle (Index: 161) within a 2D lattice with 70% ferritin loading.** **a**, Seven representative tilt images of a single unit-cell particle are shown in the first column (from left). The tilt images are aligned to a common center using IPET through iterative refinement. The projections of the raw, intermediate, and final 3D reconstruction at the corresponding angles are displayed in the subsequent four columns. **b**, A central cross-section (~23 nm thick) of the final reconstruction before masking is applied. **c**, 3D views of the central cross-section. **d**, Final 3D density map of this particle, viewed from four perpendicular directions. **e**, Final 3D reconstruction superimposed with the fitted model, viewed from four perpendicular directions. **f**, FSC analyses of the final map resolution using two methods: map-map FSC, where each map is reconstructed from one half of the images (even vs. odd tilt angle indices), and map-model FSC, where the model map is generated from the fitted model. Resolution assessments are provided based on tilt-based map-map and map-model FSC analyses at thresholds of FSC=0.5 and 0.143, respectively.



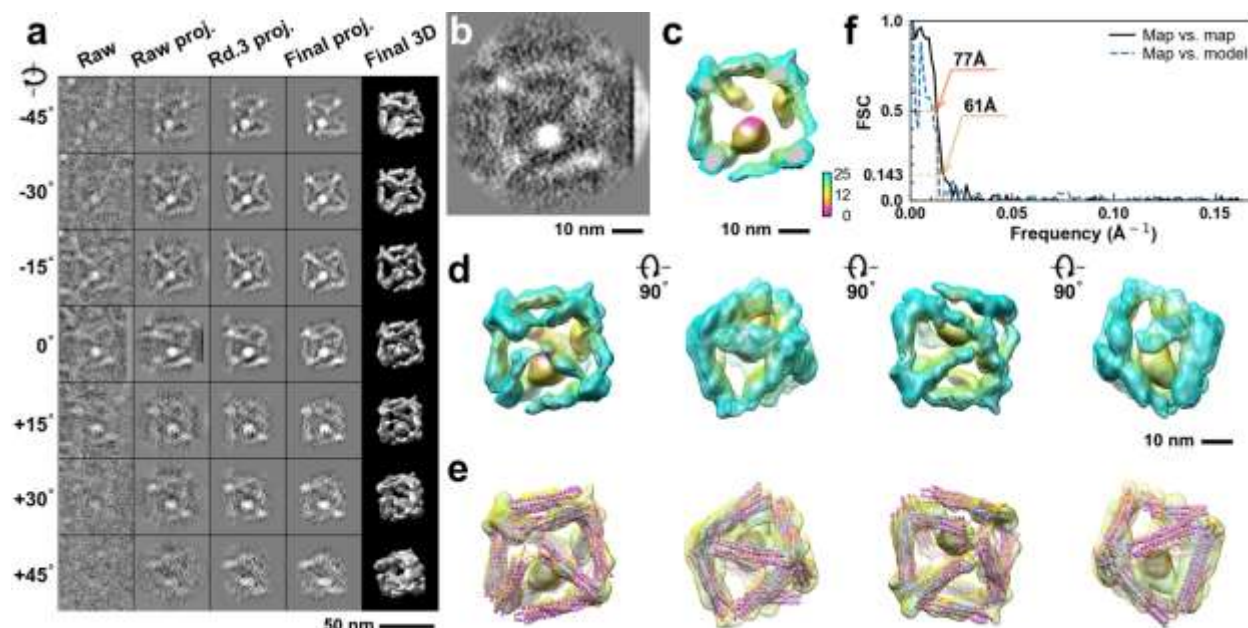

**Supplementary Fig. 170: IPET 3D reconstruction and model fitting of an individual unit-cell particle (Index: 162) within a 2D lattice with 70% ferritin loading.** **a**, Seven representative tilt images of a single unit-cell particle are shown in the first column (from left). The tilt images are aligned to a common center using IPET through iterative refinement. The projections of the raw, intermediate, and final 3D reconstruction at the corresponding angles are displayed in the subsequent four columns. **b**, A central cross-section (~23 nm thick) of the final reconstruction before masking is applied. **c**, 3D views of the central cross-section. **d**, Final 3D density map of this particle, viewed from four perpendicular directions. **e**, Final 3D reconstruction superimposed with the fitted model, viewed from four perpendicular directions. **f**, FSC analyses of the final map resolution using two methods: map-map FSC, where each map is reconstructed from one half of the images (even vs. odd tilt angle indices), and map-model FSC, where the model map is generated from the fitted model. Resolution assessments are provided based on tilt-based map-map and map-model FSC analyses at thresholds of FSC=0.5 and 0.143, respectively.

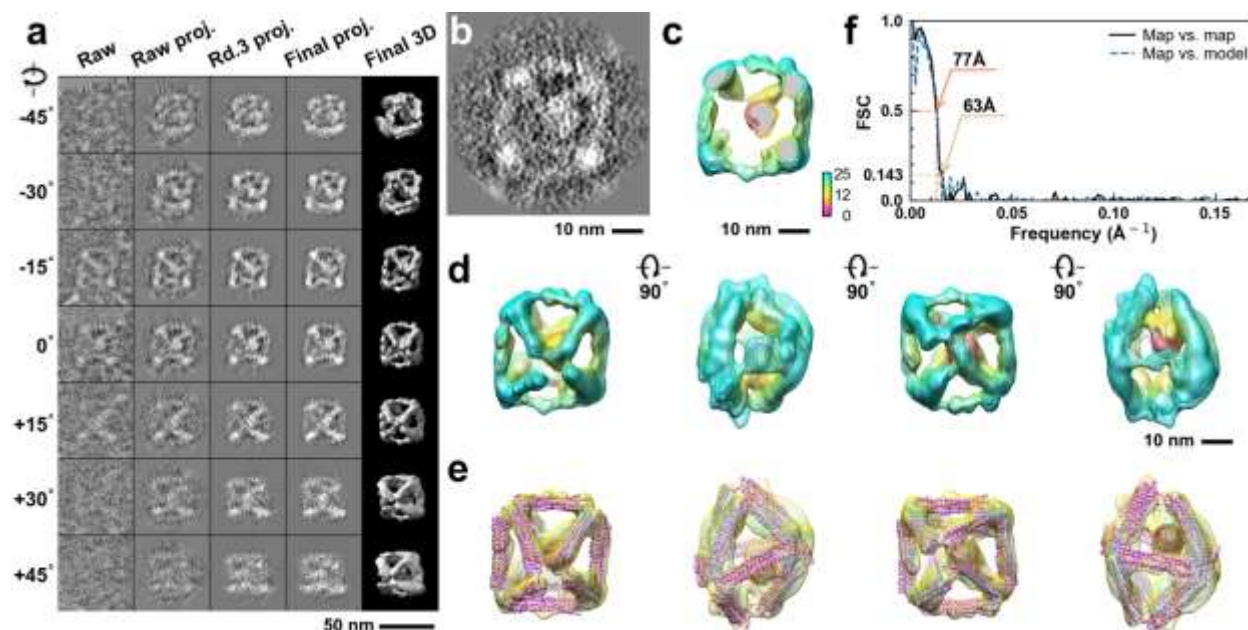

**Supplementary Fig. 171: IPET 3D reconstruction and model fitting of an individual unit-cell particle (Index: 163) within a 2D lattice with 70% ferritin loading.** **a**, Seven representative tilt images of a single unit-cell particle are shown in the first column (from left). The tilt images are aligned to a common center using IPET through iterative refinement. The projections of the raw, intermediate, and final 3D reconstruction at the corresponding angles are displayed in the subsequent four columns. **b**, A central cross-section (~23 nm thick) of the final reconstruction before masking is applied. **c**, 3D views of the central cross-section. **d**, Final 3D density map of this particle, viewed from four perpendicular directions. **e**, Final 3D reconstruction superimposed with the fitted model, viewed from four perpendicular directions. **f**, FSC analyses of the final map resolution using two methods: map-map FSC, where each map is reconstructed from one half of the images (even vs. odd tilt angle indices), and map-model FSC, where the model map is generated from the fitted model. Resolution assessments are provided based on tilt-based map-map and map-model FSC analyses at thresholds of FSC=0.5 and 0.143, respectively.

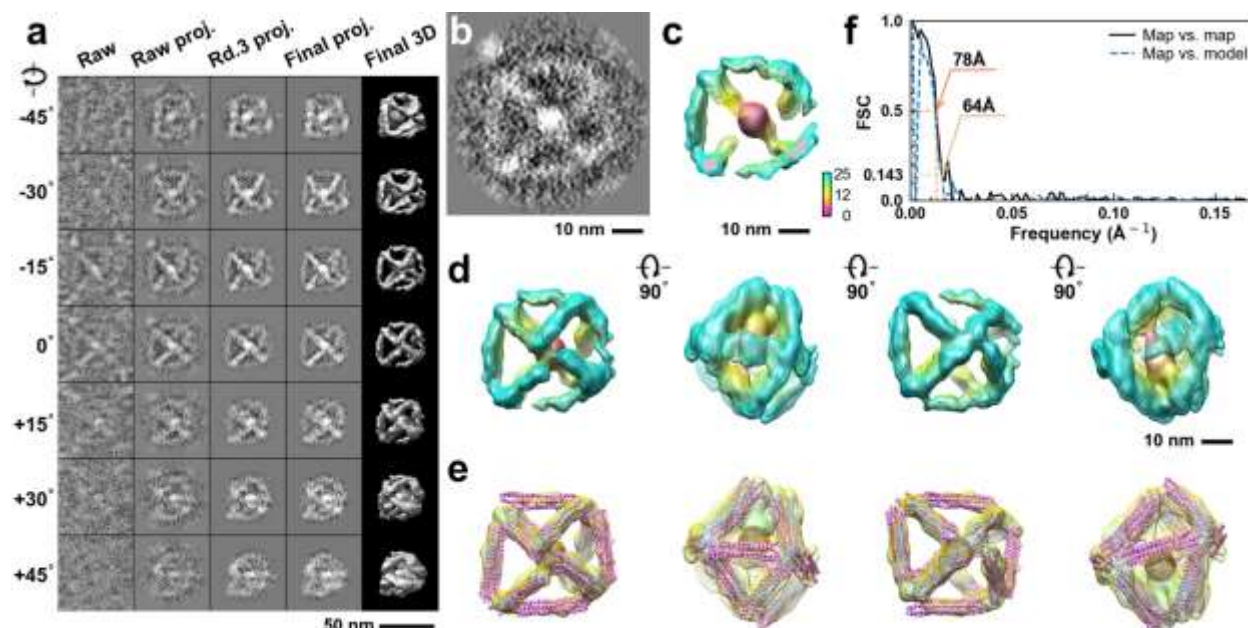

**Supplementary Fig. 172: IPET 3D reconstruction and model fitting of an individual unit-cell particle (Index: 164) within a 2D lattice with 70% ferritin loading.** **a**, Seven representative tilt images of a single unit-cell particle are shown in the first column (from left). The tilt images are aligned to a common center using IPET through iterative refinement. The projections of the raw, intermediate, and final 3D reconstruction at the corresponding angles are displayed in the subsequent four columns. **b**, A central cross-section (~23 nm thick) of the final reconstruction before masking is applied. **c**, 3D views of the central cross-section. **d**, Final 3D density map of this particle, viewed from four perpendicular directions. **e**, Final 3D reconstruction superimposed with the fitted model, viewed from four perpendicular directions. **f**, FSC analyses of the final map resolution using two methods: map-map FSC, where each map is reconstructed from one half of the images (even vs. odd tilt angle indices), and map-model FSC, where the model map is generated from the fitted model. Resolution assessments are provided based on tilt-based map-map and map-model FSC analyses at thresholds of FSC=0.5 and 0.143, respectively.

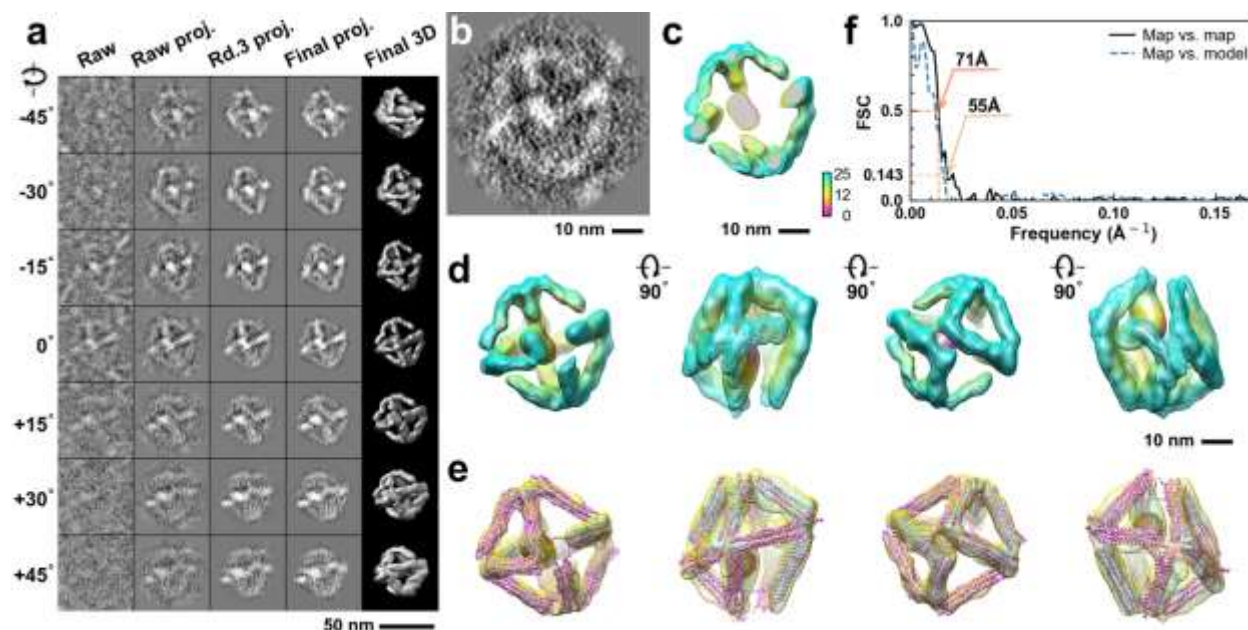

**Supplementary Fig. 173: IPET 3D reconstruction and model fitting of an individual unit-cell particle (Index: 165) within a 2D lattice with 70% ferritin loading.** **a**, Seven representative tilt images of a single unit-cell particle are shown in the first column (from left). The tilt images are aligned to a common center using IPET through iterative refinement. The projections of the raw, intermediate, and final 3D reconstruction at the corresponding angles are displayed in the subsequent four columns. **b**, A central cross-section (~23 nm thick) of the final reconstruction before masking is applied. **c**, 3D views of the central cross-section. **d**, Final 3D density map of this particle, viewed from four perpendicular directions. **e**, Final 3D reconstruction superimposed with the fitted model, viewed from four perpendicular directions. **f**, FSC analyses of the final map resolution using two methods: map-map FSC, where each map is reconstructed from one half of the images (even vs. odd tilt angle indices), and map-model FSC, where the model map is generated from the fitted model. Resolution assessments are provided based on tilt-based map-map and map-model FSC analyses at thresholds of FSC=0.5 and 0.143, respectively.



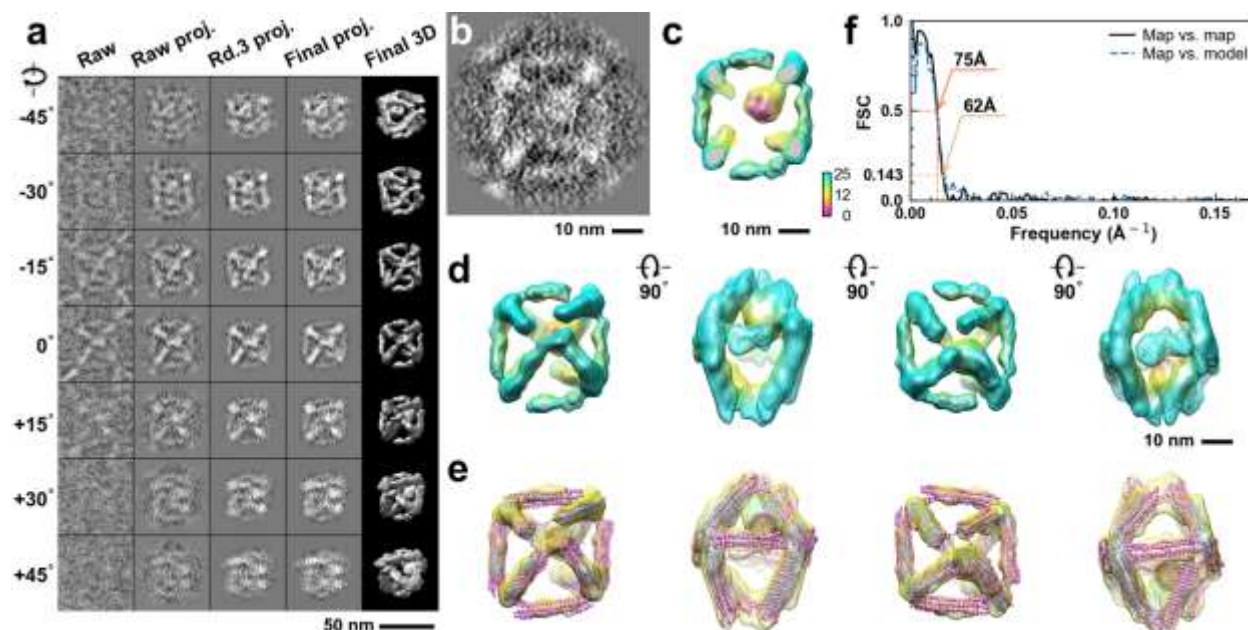

**Supplementary Fig. 174: IPET 3D reconstruction and model fitting of an individual unit-cell particle (Index: 166) within a 2D lattice with 70% ferritin loading.** **a**, Seven representative tilt images of a single unit-cell particle are shown in the first column (from left). The tilt images are aligned to a common center using IPET through iterative refinement. The projections of the raw, intermediate, and final 3D reconstruction at the corresponding angles are displayed in the subsequent four columns. **b**, A central cross-section (~23 nm thick) of the final reconstruction before masking is applied. **c**, 3D views of the central cross-section. **d**, Final 3D density map of this particle, viewed from four perpendicular directions. **e**, Final 3D reconstruction superimposed with the fitted model, viewed from four perpendicular directions. **f**, FSC analyses of the final map resolution using two methods: map-map FSC, where each map is reconstructed from one half of the images (even vs. odd tilt angle indices), and map-model FSC, where the model map is generated from the fitted model. Resolution assessments are provided based on tilt-based map-map and map-model FSC analyses at thresholds of FSC=0.5 and 0.143, respectively.

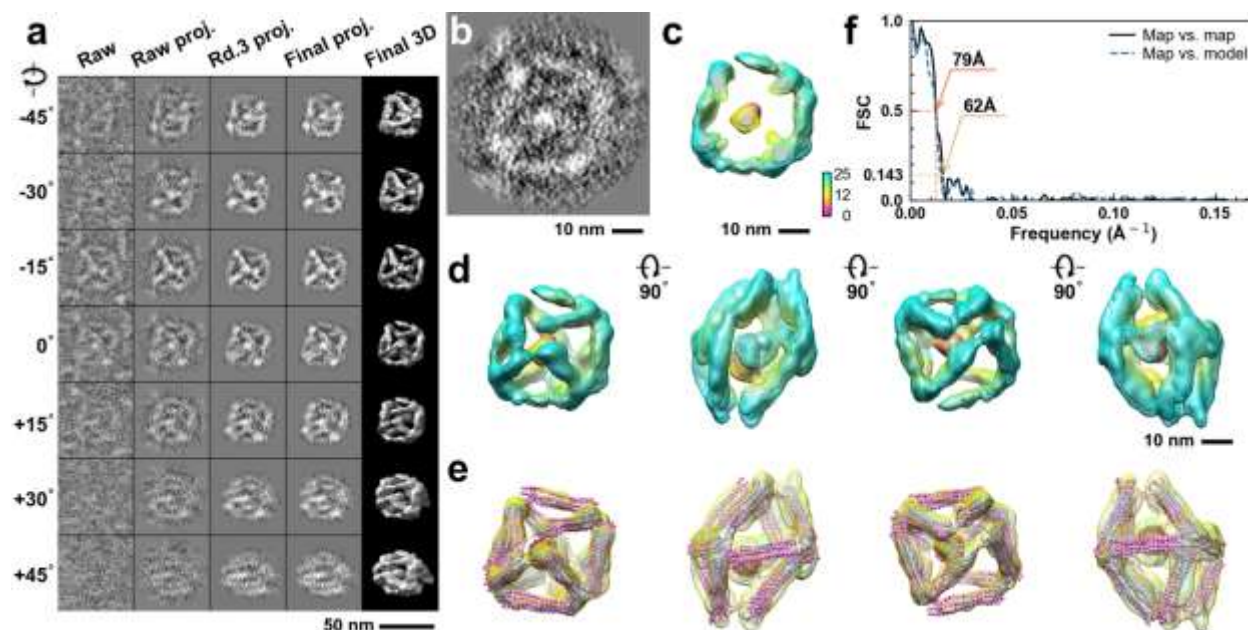

**Supplementary Fig. 175: IPET 3D reconstruction and model fitting of an individual unit-cell particle (Index: 167) within a 2D lattice with 70% ferritin loading.** **a**, Seven representative tilt images of a single unit-cell particle are shown in the first column (from left). The tilt images are aligned to a common center using IPET through iterative refinement. The projections of the raw, intermediate, and final 3D reconstruction at the corresponding angles are displayed in the subsequent four columns. **b**, A central cross-section (~23 nm thick) of the final reconstruction before masking is applied. **c**, 3D views of the central cross-section. **d**, Final 3D density map of this particle, viewed from four perpendicular directions. **e**, Final 3D reconstruction superimposed with the fitted model, viewed from four perpendicular directions. **f**, FSC analyses of the final map resolution using two methods: map-map FSC, where each map is reconstructed from one half of the images (even vs. odd tilt angle indices), and map-model FSC, where the model map is generated from the fitted model. Resolution assessments are provided based on tilt-based map-map and map-model FSC analyses at thresholds of FSC=0.5 and 0.143, respectively.

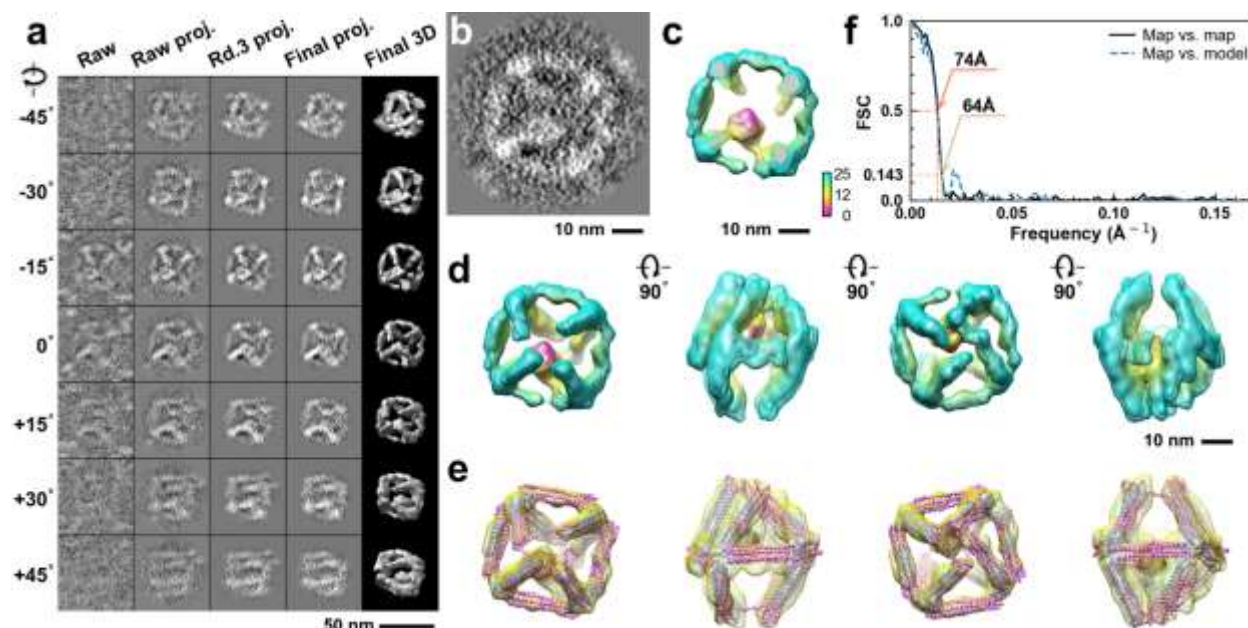

**Supplementary Fig. 176: IPET 3D reconstruction and model fitting of an individual unit-cell particle (Index: 168) within a 2D lattice with 70% ferritin loading.** **a**, Seven representative tilt images of a single unit-cell particle are shown in the first column (from left). The tilt images are aligned to a common center using IPET through iterative refinement. The projections of the raw, intermediate, and final 3D reconstruction at the corresponding angles are displayed in the subsequent four columns. **b**, A central cross-section (~23 nm thick) of the final reconstruction before masking is applied. **c**, 3D views of the central cross-section. **d**, Final 3D density map of this particle, viewed from four perpendicular directions. **e**, Final 3D reconstruction superimposed with the fitted model, viewed from four perpendicular directions. **f**, FSC analyses of the final map resolution using two methods: map-map FSC, where each map is reconstructed from one half of the images (even vs. odd tilt angle indices), and map-model FSC, where the model map is generated from the fitted model. Resolution assessments are provided based on tilt-based map-map and map-model FSC analyses at thresholds of FSC=0.5 and 0.143, respectively.

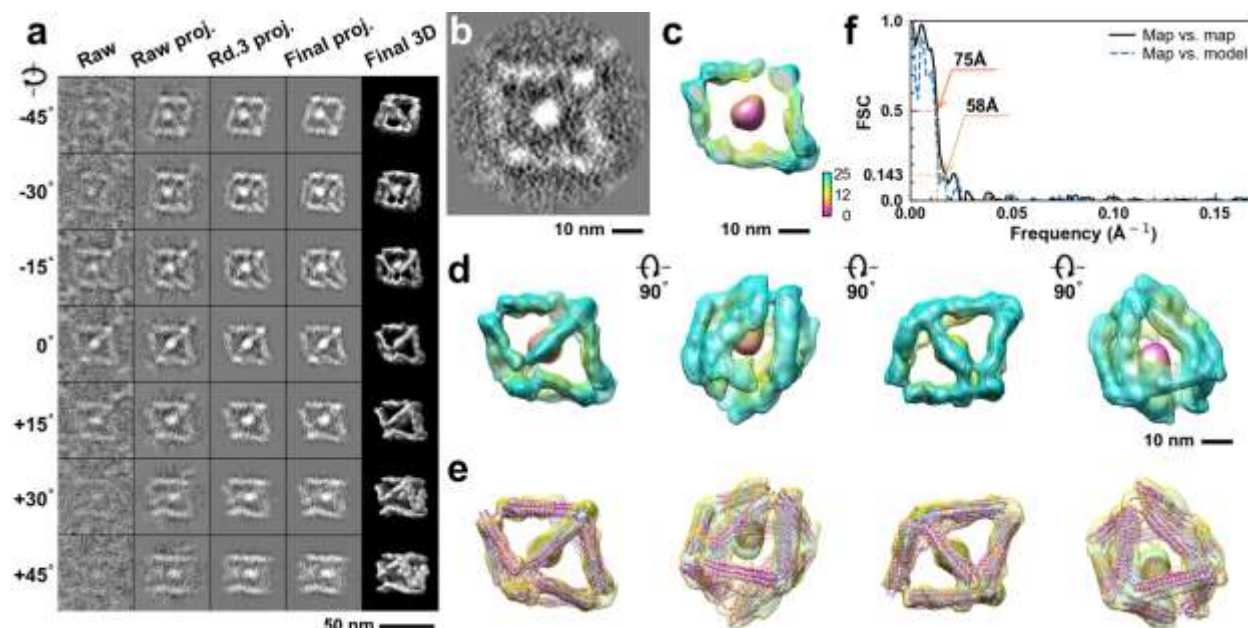

**Supplementary Fig. 177: IPET 3D reconstruction and model fitting of an individual unit-cell particle (Index: 169) within a 2D lattice with 70% ferritin loading.** **a**, Seven representative tilt images of a single unit-cell particle are shown in the first column (from left). The tilt images are aligned to a common center using IPET through iterative refinement. The projections of the raw, intermediate, and final 3D reconstruction at the corresponding angles are displayed in the subsequent four columns. **b**, A central cross-section (~23 nm thick) of the final reconstruction before masking is applied. **c**, 3D views of the central cross-section. **d**, Final 3D density map of this particle, viewed from four perpendicular directions. **e**, Final 3D reconstruction superimposed with the fitted model, viewed from four perpendicular directions. **f**, FSC analyses of the final map resolution using two methods: map-map FSC, where each map is reconstructed from one half of the images (even vs. odd tilt angle indices), and map-model FSC, where the model map is generated from the fitted model. Resolution assessments are provided based on tilt-based map-map and map-model FSC analyses at thresholds of FSC=0.5 and 0.143, respectively.



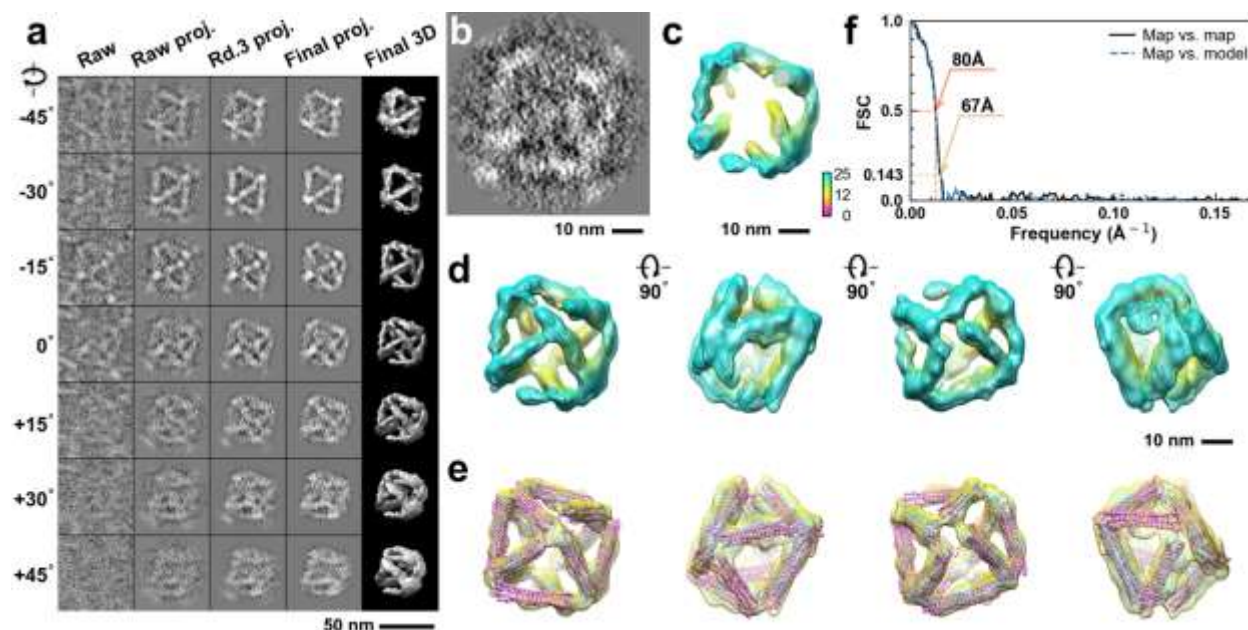

**Supplementary Fig. 178: IPET 3D reconstruction and model fitting of an individual unit-cell particle (Index: 170) within a 2D lattice with 70% ferritin loading.** **a**, Seven representative tilt images of a single unit-cell particle are shown in the first column (from left). The tilt images are aligned to a common center using IPET through iterative refinement. The projections of the raw, intermediate, and final 3D reconstruction at the corresponding angles are displayed in the subsequent four columns. **b**, A central cross-section (~23 nm thick) of the final reconstruction before masking is applied. **c**, 3D views of the central cross-section. **d**, Final 3D density map of this particle, viewed from four perpendicular directions. **e**, Final 3D reconstruction superimposed with the fitted model, viewed from four perpendicular directions. **f**, FSC analyses of the final map resolution using two methods: map-map FSC, where each map is reconstructed from one half of the images (even vs. odd tilt angle indices), and map-model FSC, where the model map is generated from the fitted model. Resolution assessments are provided based on tilt-based map-map and map-model FSC analyses at thresholds of FSC=0.5 and 0.143, respectively.

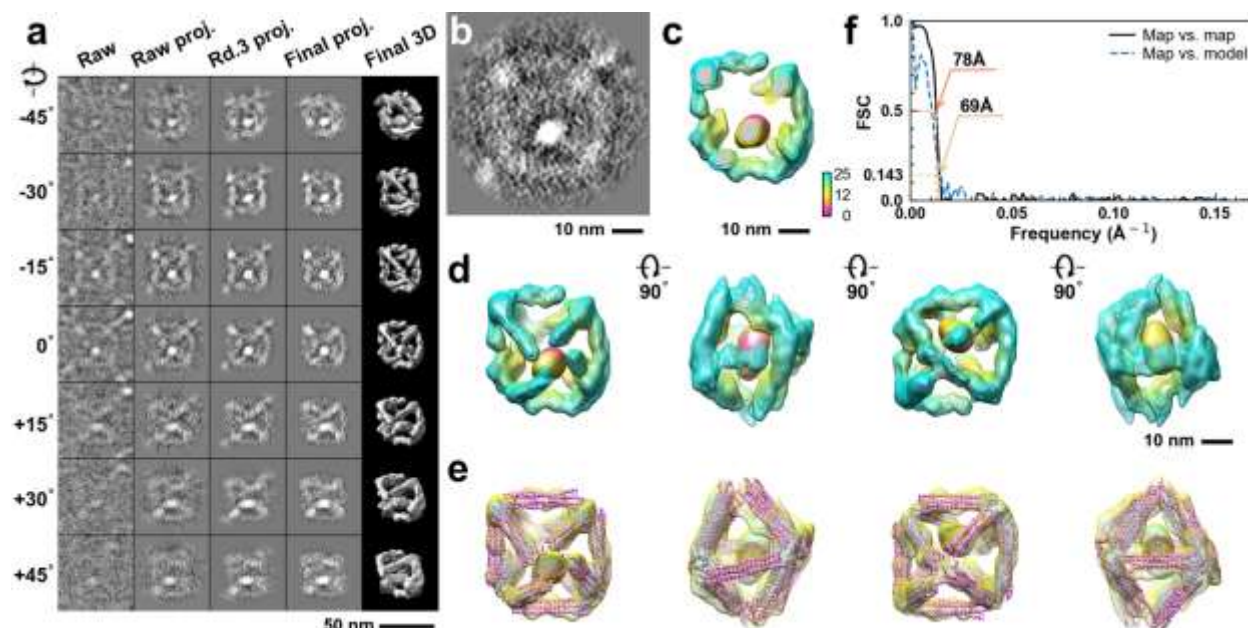

**Supplementary Fig. 179: IPET 3D reconstruction and model fitting of an individual unit-cell particle (Index: 171) within a 2D lattice with 70% ferritin loading.** **a**, Seven representative tilt images of a single unit-cell particle are shown in the first column (from left). The tilt images are aligned to a common center using IPET through iterative refinement. The projections of the raw, intermediate, and final 3D reconstruction at the corresponding angles are displayed in the subsequent four columns. **b**, A central cross-section (~23 nm thick) of the final reconstruction before masking is applied. **c**, 3D views of the central cross-section. **d**, Final 3D density map of this particle, viewed from four perpendicular directions. **e**, Final 3D reconstruction superimposed with the fitted model, viewed from four perpendicular directions. **f**, FSC analyses of the final map resolution using two methods: map-map FSC, where each map is reconstructed from one half of the images (even vs. odd tilt angle indices), and map-model FSC, where the model map is generated from the fitted model. Resolution assessments are provided based on tilt-based map-map and map-model FSC analyses at thresholds of FSC=0.5 and 0.143, respectively.

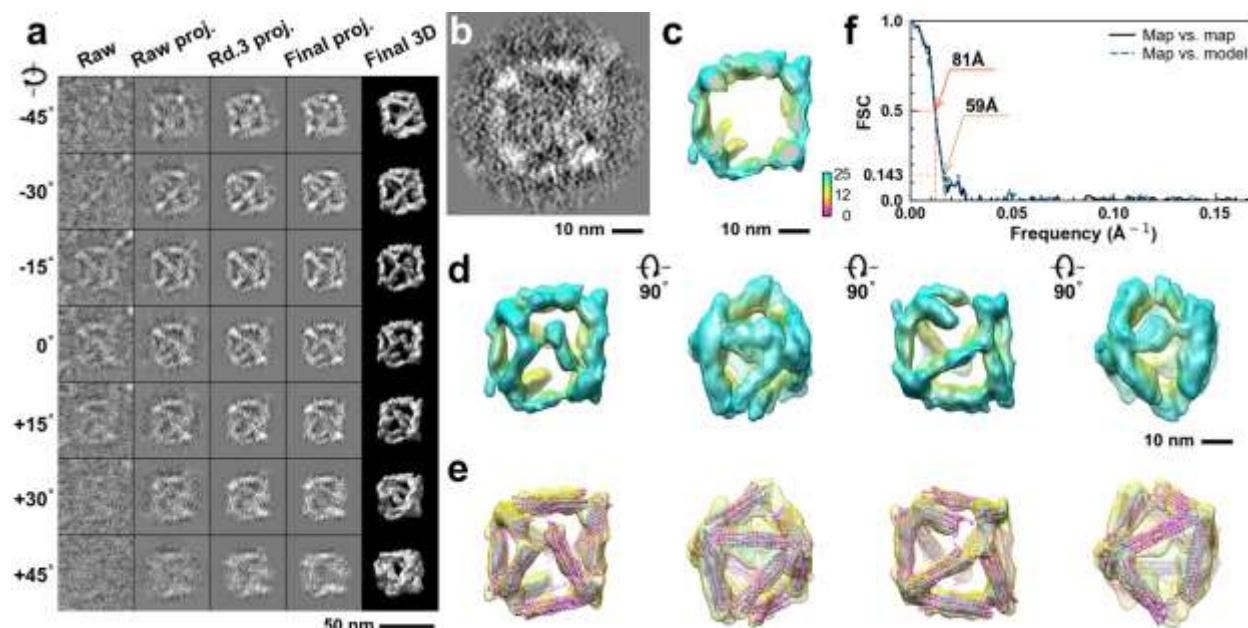

**Supplementary Fig. 180: IPET 3D reconstruction and model fitting of an individual unit-cell particle (Index: 172) within a 2D lattice with 70% ferritin loading.** **a**, Seven representative tilt images of a single unit-cell particle are shown in the first column (from left). The tilt images are aligned to a common center using IPET through iterative refinement. The projections of the raw, intermediate, and final 3D reconstruction at the corresponding angles are displayed in the subsequent four columns. **b**, A central cross-section (~23 nm thick) of the final reconstruction before masking is applied. **c**, 3D views of the central cross-section. **d**, Final 3D density map of this particle, viewed from four perpendicular directions. **e**, Final 3D reconstruction superimposed with the fitted model, viewed from four perpendicular directions. **f**, FSC analyses of the final map resolution using two methods: map-map FSC, where each map is reconstructed from one half of the images (even vs. odd tilt angle indices), and map-model FSC, where the model map is generated from the fitted model. Resolution assessments are provided based on tilt-based map-map and map-model FSC analyses at thresholds of FSC=0.5 and 0.143, respectively.

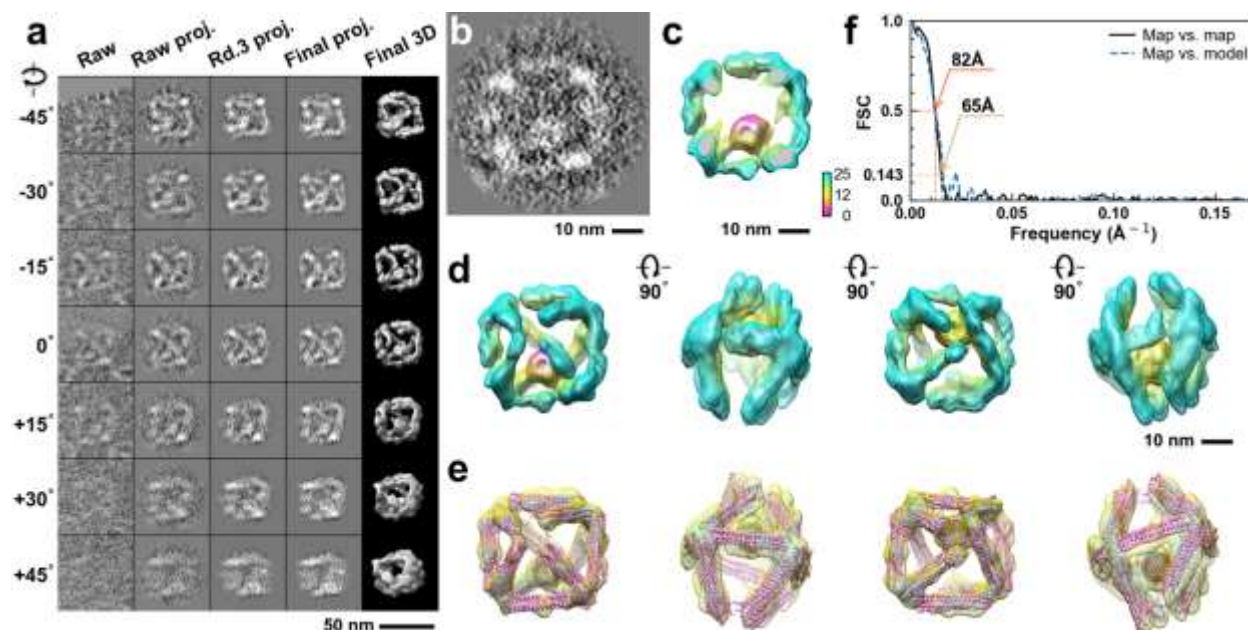

**Supplementary Fig. 181: IPET 3D reconstruction and model fitting of an individual unit-cell particle (Index: 173) within a 2D lattice with 70% ferritin loading.** **a**, Seven representative tilt images of a single unit-cell particle are shown in the first column (from left). The tilt images are aligned to a common center using IPET through iterative refinement. The projections of the raw, intermediate, and final 3D reconstruction at the corresponding angles are displayed in the subsequent four columns. **b**, A central cross-section (~23 nm thick) of the final reconstruction before masking is applied. **c**, 3D views of the central cross-section. **d**, Final 3D density map of this particle, viewed from four perpendicular directions. **e**, Final 3D reconstruction superimposed with the fitted model, viewed from four perpendicular directions. **f**, FSC analyses of the final map resolution using two methods: map-map FSC, where each map is reconstructed from one half of the images (even vs. odd tilt angle indices), and map-model FSC, where the model map is generated from the fitted model. Resolution assessments are provided based on tilt-based map-map and map-model FSC analyses at thresholds of FSC=0.5 and 0.143, respectively.



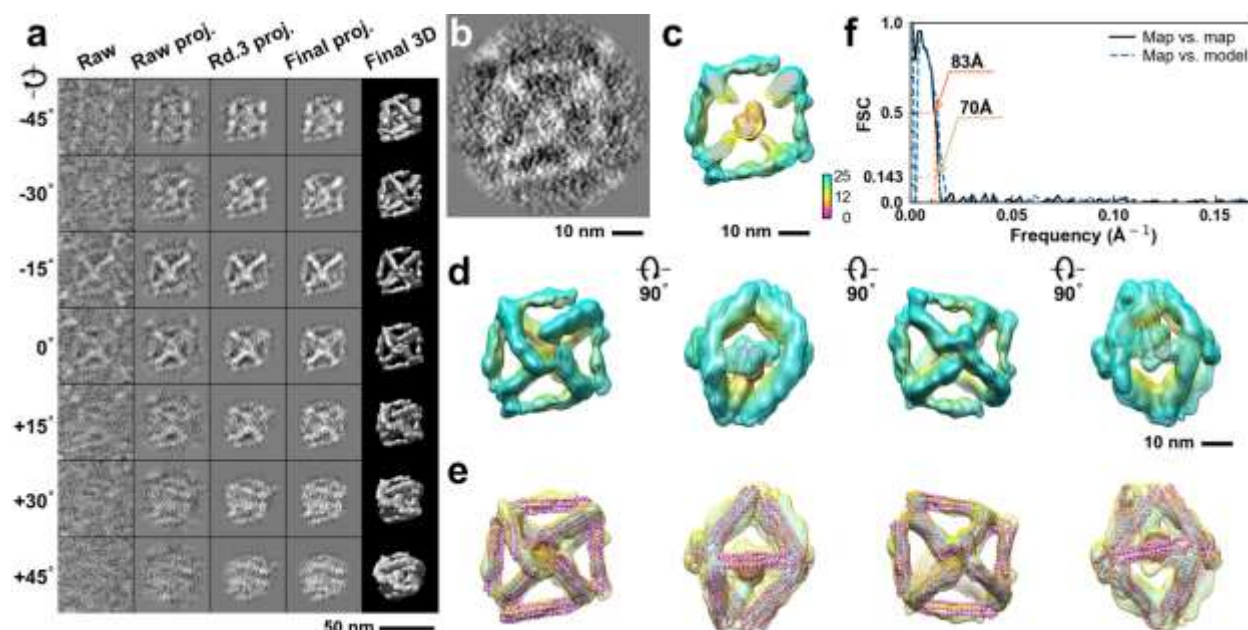

**Supplementary Fig. 182: IPET 3D reconstruction and model fitting of an individual unit-cell particle (Index: 174) within a 2D lattice with 70% ferritin loading.** **a**, Seven representative tilt images of a single unit-cell particle are shown in the first column (from left). The tilt images are aligned to a common center using IPET through iterative refinement. The projections of the raw, intermediate, and final 3D reconstruction at the corresponding angles are displayed in the subsequent four columns. **b**, A central cross-section (~23 nm thick) of the final reconstruction before masking is applied. **c**, 3D views of the central cross-section. **d**, Final 3D density map of this particle, viewed from four perpendicular directions. **e**, Final 3D reconstruction superimposed with the fitted model, viewed from four perpendicular directions. **f**, FSC analyses of the final map resolution using two methods: map-map FSC, where each map is reconstructed from one half of the images (even vs. odd tilt angle indices), and map-model FSC, where the model map is generated from the fitted model. Resolution assessments are provided based on tilt-based map-map and map-model FSC analyses at thresholds of FSC=0.5 and 0.143, respectively.

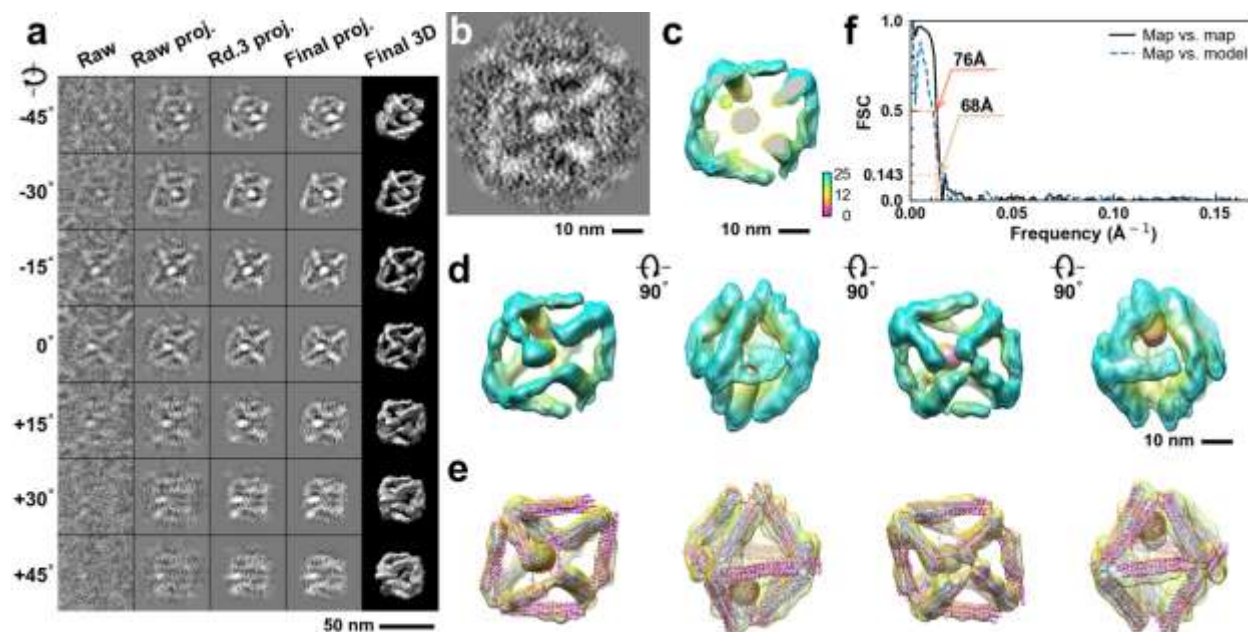

**Supplementary Fig. 183: IPET 3D reconstruction and model fitting of an individual unit-cell particle (Index: 175) within a 2D lattice with 70% ferritin loading.** **a**, Seven representative tilt images of a single unit-cell particle are shown in the first column (from left). The tilt images are aligned to a common center using IPET through iterative refinement. The projections of the raw, intermediate, and final 3D reconstruction at the corresponding angles are displayed in the subsequent four columns. **b**, A central cross-section (~23 nm thick) of the final reconstruction before masking is applied. **c**, 3D views of the central cross-section. **d**, Final 3D density map of this particle, viewed from four perpendicular directions. **e**, Final 3D reconstruction superimposed with the fitted model, viewed from four perpendicular directions. **f**, FSC analyses of the final map resolution using two methods: map-map FSC, where each map is reconstructed from one half of the images (even vs. odd tilt angle indices), and map-model FSC, where the model map is generated from the fitted model. Resolution assessments are provided based on tilt-based map-map and map-model FSC analyses at thresholds of FSC=0.5 and 0.143, respectively.

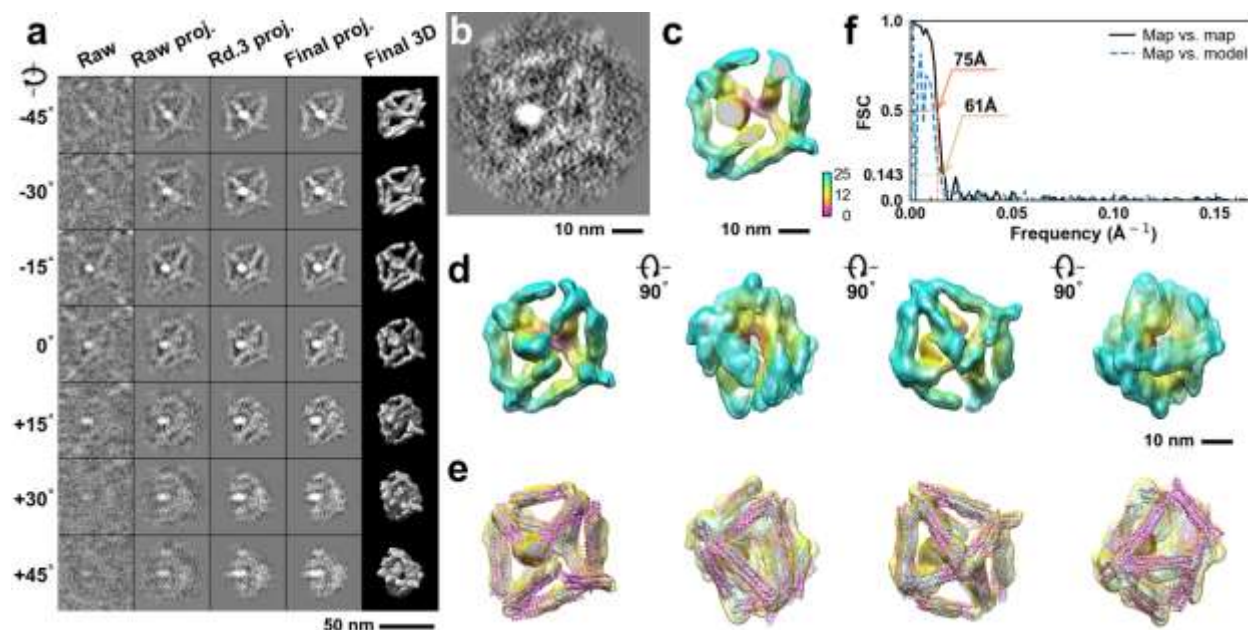

**Supplementary Fig. 184: IPET 3D reconstruction and model fitting of an individual unit-cell particle (Index: 176) within a 2D lattice with 70% ferritin loading.** **a**, Seven representative tilt images of a single unit-cell particle are shown in the first column (from left). The tilt images are aligned to a common center using IPET through iterative refinement. The projections of the raw, intermediate, and final 3D reconstruction at the corresponding angles are displayed in the subsequent four columns. **b**, A central cross-section (~23 nm thick) of the final reconstruction before masking is applied. **c**, 3D views of the central cross-section. **d**, Final 3D density map of this particle, viewed from four perpendicular directions. **e**, Final 3D reconstruction superimposed with the fitted model, viewed from four perpendicular directions. **f**, FSC analyses of the final map resolution using two methods: map-map FSC, where each map is reconstructed from one half of the images (even vs. odd tilt angle indices), and map-model FSC, where the model map is generated from the fitted model. Resolution assessments are provided based on tilt-based map-map and map-model FSC analyses at thresholds of FSC=0.5 and 0.143, respectively.

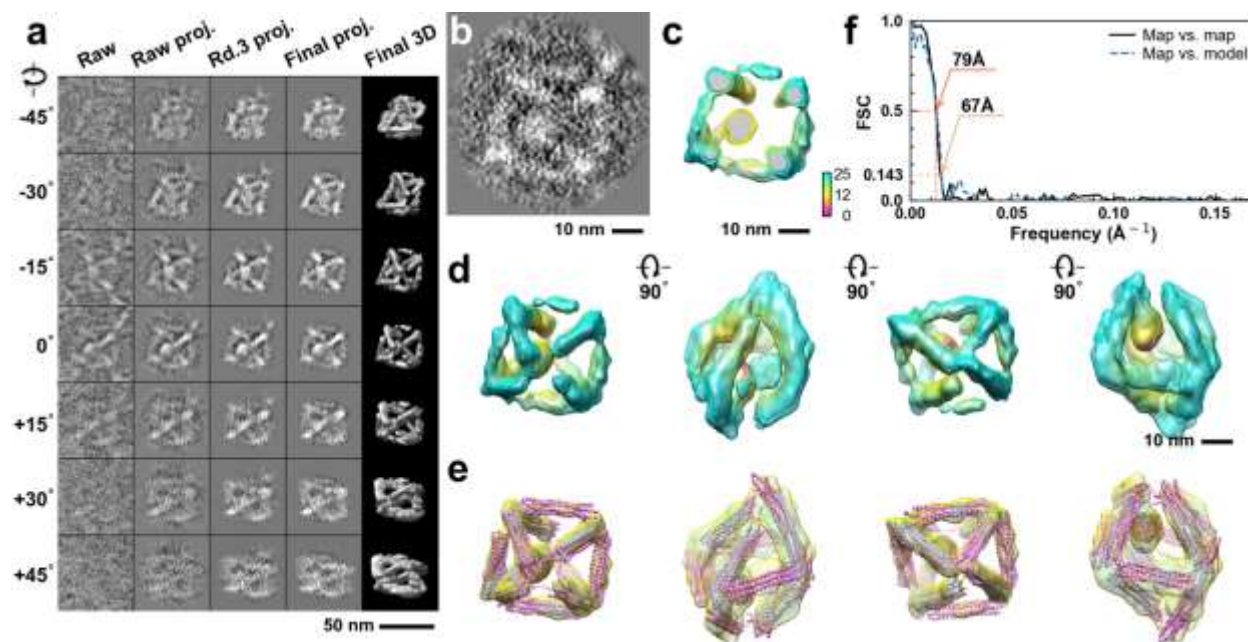

**Supplementary Fig. 185: IPET 3D reconstruction and model fitting of an individual unit-cell particle (Index: 177) within a 2D lattice with 70% ferritin loading.** **a**, Seven representative tilt images of a single unit-cell particle are shown in the first column (from left). The tilt images are aligned to a common center using IPET through iterative refinement. The projections of the raw, intermediate, and final 3D reconstruction at the corresponding angles are displayed in the subsequent four columns. **b**, A central cross-section (~23 nm thick) of the final reconstruction before masking is applied. **c**, 3D views of the central cross-section. **d**, Final 3D density map of this particle, viewed from four perpendicular directions. **e**, Final 3D reconstruction superimposed with the fitted model, viewed from four perpendicular directions. **f**, FSC analyses of the final map resolution using two methods: map-map FSC, where each map is reconstructed from one half of the images (even vs. odd tilt angle indices), and map-model FSC, where the model map is generated from the fitted model. Resolution assessments are provided based on tilt-based map-map and map-model FSC analyses at thresholds of FSC=0.5 and 0.143, respectively.



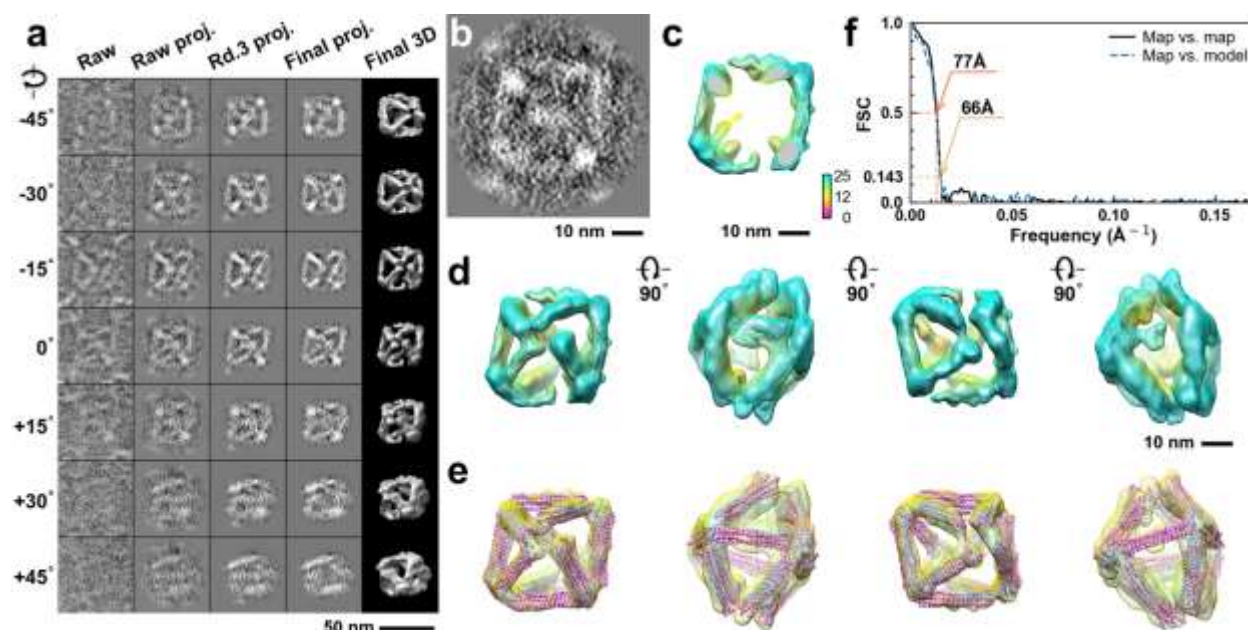

**Supplementary Fig. 186: IPET 3D reconstruction and model fitting of an individual unit-cell particle (Index: 178) within a 2D lattice with 70% ferritin loading.** **a**, Seven representative tilt images of a single unit-cell particle are shown in the first column (from left). The tilt images are aligned to a common center using IPET through iterative refinement. The projections of the raw, intermediate, and final 3D reconstruction at the corresponding angles are displayed in the subsequent four columns. **b**, A central cross-section (~23 nm thick) of the final reconstruction before masking is applied. **c**, 3D views of the central cross-section. **d**, Final 3D density map of this particle, viewed from four perpendicular directions. **e**, Final 3D reconstruction superimposed with the fitted model, viewed from four perpendicular directions. **f**, FSC analyses of the final map resolution using two methods: map-map FSC, where each map is reconstructed from one half of the images (even vs. odd tilt angle indices), and map-model FSC, where the model map is generated from the fitted model. Resolution assessments are provided based on tilt-based map-map and map-model FSC analyses at thresholds of FSC=0.5 and 0.143, respectively.

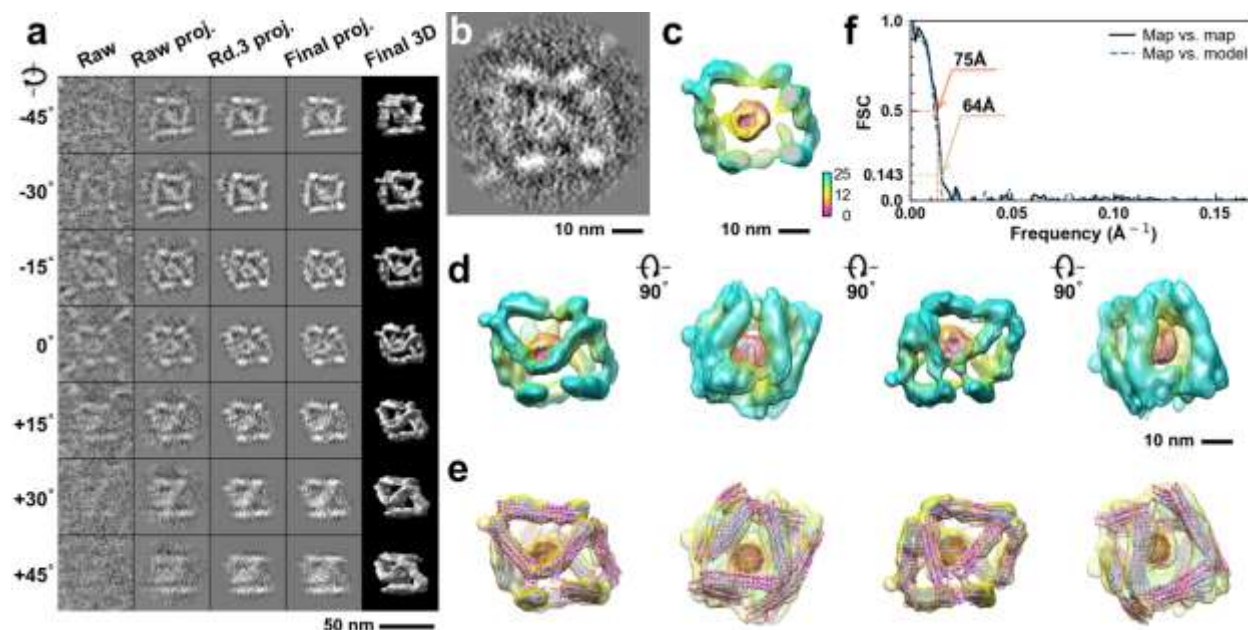

**Supplementary Fig. 187: IPET 3D reconstruction and model fitting of an individual unit-cell particle (Index: 179) within a 2D lattice with 70% ferritin loading.** **a**, Seven representative tilt images of a single unit-cell particle are shown in the first column (from left). The tilt images are aligned to a common center using IPET through iterative refinement. The projections of the raw, intermediate, and final 3D reconstruction at the corresponding angles are displayed in the subsequent four columns. **b**, A central cross-section (~23 nm thick) of the final reconstruction before masking is applied. **c**, 3D views of the central cross-section. **d**, Final 3D density map of this particle, viewed from four perpendicular directions. **e**, Final 3D reconstruction superimposed with the fitted model, viewed from four perpendicular directions. **f**, FSC analyses of the final map resolution using two methods: map-map FSC, where each map is reconstructed from one half of the images (even vs. odd tilt angle indices), and map-model FSC, where the model map is generated from the fitted model. Resolution assessments are provided based on tilt-based map-map and map-model FSC analyses at thresholds of FSC=0.5 and 0.143, respectively.

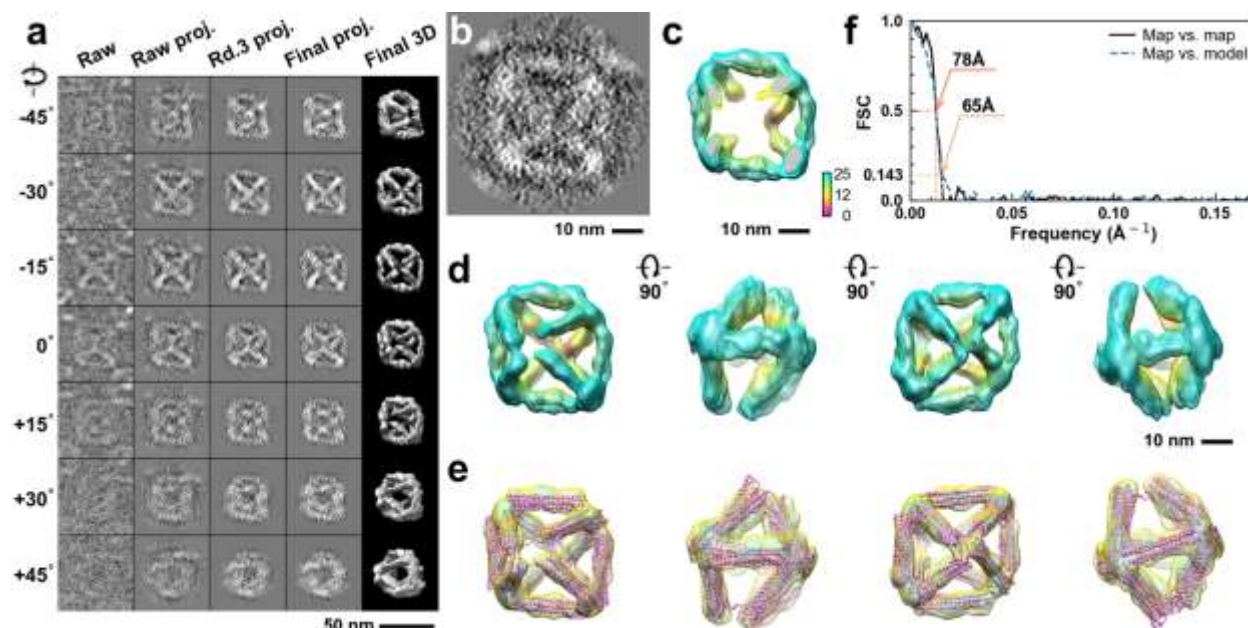

**Supplementary Fig. 188: IPET 3D reconstruction and model fitting of an individual unit-cell particle (Index: 180) within a 2D lattice with 70% ferritin loading.** **a**, Seven representative tilt images of a single unit-cell particle are shown in the first column (from left). The tilt images are aligned to a common center using IPET through iterative refinement. The projections of the raw, intermediate, and final 3D reconstruction at the corresponding angles are displayed in the subsequent four columns. **b**, A central cross-section (~23 nm thick) of the final reconstruction before masking is applied. **c**, 3D views of the central cross-section. **d**, Final 3D density map of this particle, viewed from four perpendicular directions. **e**, Final 3D reconstruction superimposed with the fitted model, viewed from four perpendicular directions. **f**, FSC analyses of the final map resolution using two methods: map-map FSC, where each map is reconstructed from one half of the images (even vs. odd tilt angle indices), and map-model FSC, where the model map is generated from the fitted model. Resolution assessments are provided based on tilt-based map-map and map-model FSC analyses at thresholds of FSC=0.5 and 0.143, respectively.

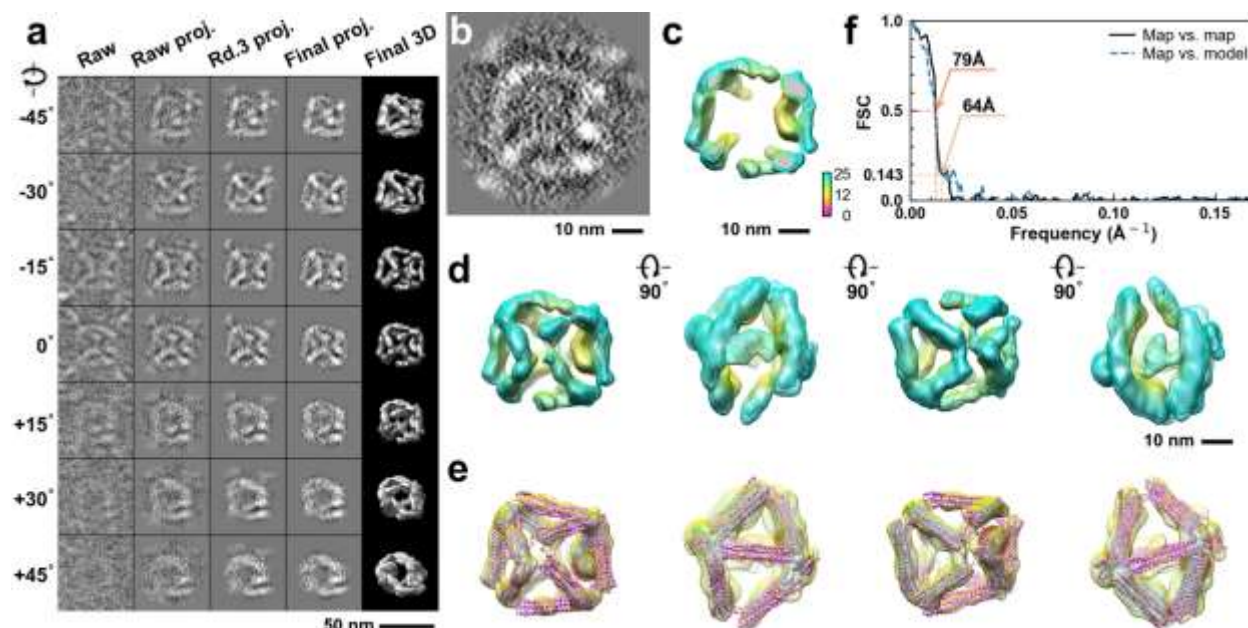

**Supplementary Fig. 189: IPET 3D reconstruction and model fitting of an individual unit-cell particle (Index: 181) within a 2D lattice with 70% ferritin loading.** **a**, Seven representative tilt images of a single unit-cell particle are shown in the first column (from left). The tilt images are aligned to a common center using IPET through iterative refinement. The projections of the raw, intermediate, and final 3D reconstruction at the corresponding angles are displayed in the subsequent four columns. **b**, A central cross-section (~23 nm thick) of the final reconstruction before masking is applied. **c**, 3D views of the central cross-section. **d**, Final 3D density map of this particle, viewed from four perpendicular directions. **e**, Final 3D reconstruction superimposed with the fitted model, viewed from four perpendicular directions. **f**, FSC analyses of the final map resolution using two methods: map-map FSC, where each map is reconstructed from one half of the images (even vs. odd tilt angle indices), and map-model FSC, where the model map is generated from the fitted model. Resolution assessments are provided based on tilt-based map-map and map-model FSC analyses at thresholds of FSC=0.5 and 0.143, respectively.



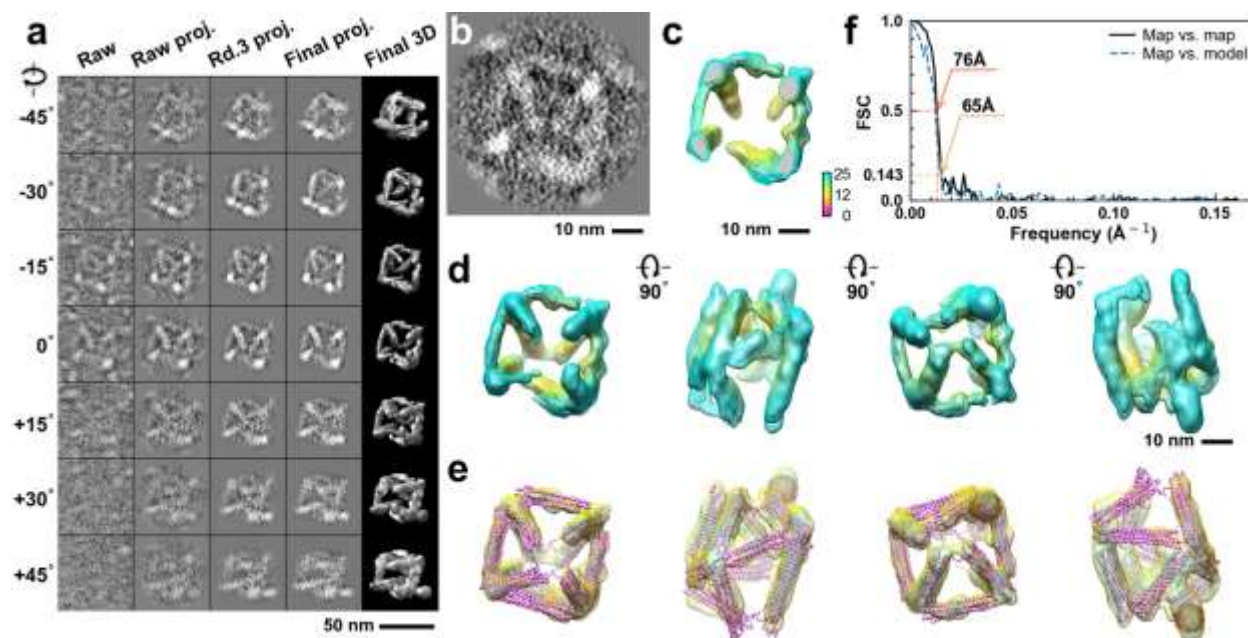

**Supplementary Fig. 190: IPET 3D reconstruction and model fitting of an individual unit-cell particle (Index: 182) within a 2D lattice with 70% ferritin loading.** **a**, Seven representative tilt images of a single unit-cell particle are shown in the first column (from left). The tilt images are aligned to a common center using IPET through iterative refinement. The projections of the raw, intermediate, and final 3D reconstruction at the corresponding angles are displayed in the subsequent four columns. **b**, A central cross-section (~23 nm thick) of the final reconstruction before masking is applied. **c**, 3D views of the central cross-section. **d**, Final 3D density map of this particle, viewed from four perpendicular directions. **e**, Final 3D reconstruction superimposed with the fitted model, viewed from four perpendicular directions. **f**, FSC analyses of the final map resolution using two methods: map-map FSC, where each map is reconstructed from one half of the images (even vs. odd tilt angle indices), and map-model FSC, where the model map is generated from the fitted model. Resolution assessments are provided based on tilt-based map-map and map-model FSC analyses at thresholds of FSC=0.5 and 0.143, respectively.

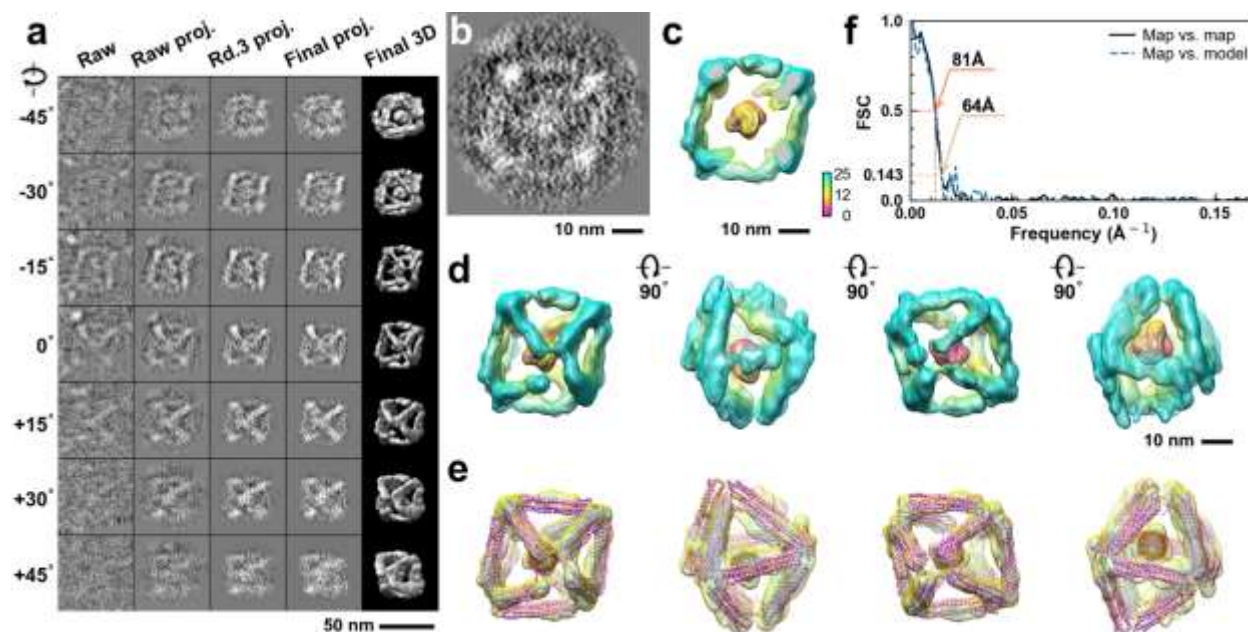

**Supplementary Fig. 191: IPET 3D reconstruction and model fitting of an individual unit-cell particle (Index: 183) within a 2D lattice with 70% ferritin loading.** **a**, Seven representative tilt images of a single unit-cell particle are shown in the first column (from left). The tilt images are aligned to a common center using IPET through iterative refinement. The projections of the raw, intermediate, and final 3D reconstruction at the corresponding angles are displayed in the subsequent four columns. **b**, A central cross-section (~23 nm thick) of the final reconstruction before masking is applied. **c**, 3D views of the central cross-section. **d**, Final 3D density map of this particle, viewed from four perpendicular directions. **e**, Final 3D reconstruction superimposed with the fitted model, viewed from four perpendicular directions. **f**, FSC analyses of the final map resolution using two methods: map-map FSC, where each map is reconstructed from one half of the images (even vs. odd tilt angle indices), and map-model FSC, where the model map is generated from the fitted model. Resolution assessments are provided based on tilt-based map-map and map-model FSC analyses at thresholds of FSC=0.5 and 0.143, respectively.

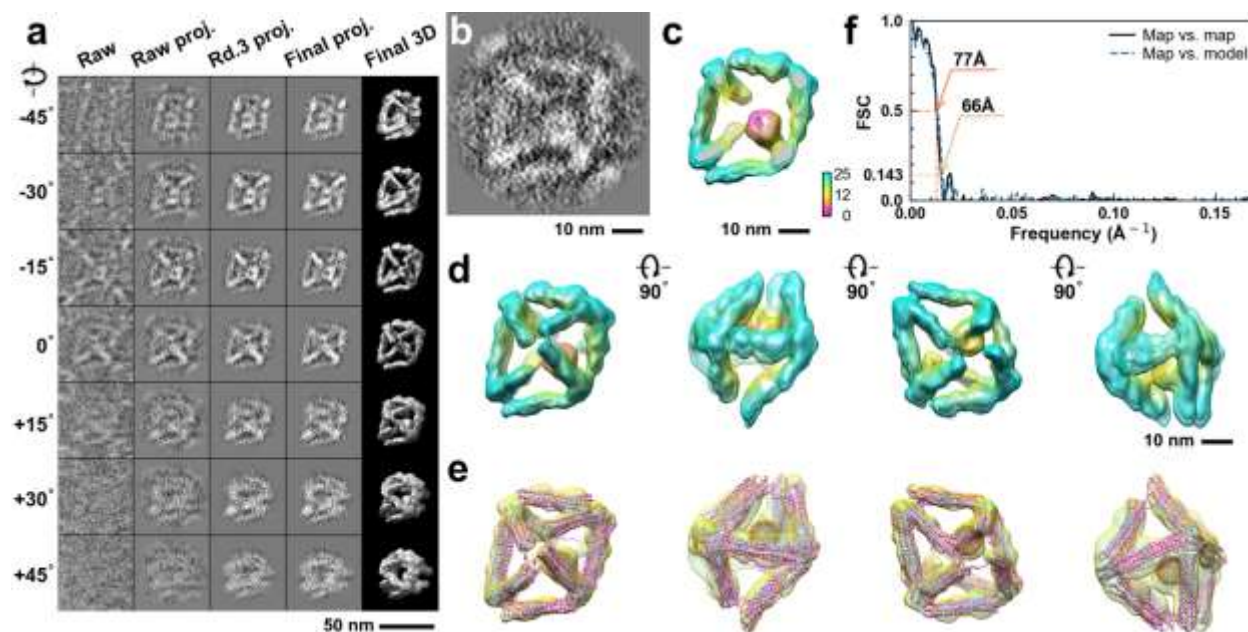

**Supplementary Fig. 192: IPET 3D reconstruction and model fitting of an individual unit-cell particle (Index: 184) within a 2D lattice with 70% ferritin loading.** **a**, Seven representative tilt images of a single unit-cell particle are shown in the first column (from left). The tilt images are aligned to a common center using IPET through iterative refinement. The projections of the raw, intermediate, and final 3D reconstruction at the corresponding angles are displayed in the subsequent four columns. **b**, A central cross-section (~23 nm thick) of the final reconstruction before masking is applied. **c**, 3D views of the central cross-section. **d**, Final 3D density map of this particle, viewed from four perpendicular directions. **e**, Final 3D reconstruction superimposed with the fitted model, viewed from four perpendicular directions. **f**, FSC analyses of the final map resolution using two methods: map-map FSC, where each map is reconstructed from one half of the images (even vs. odd tilt angle indices), and map-model FSC, where the model map is generated from the fitted model. Resolution assessments are provided based on tilt-based map-map and map-model FSC analyses at thresholds of FSC=0.5 and 0.143, respectively.

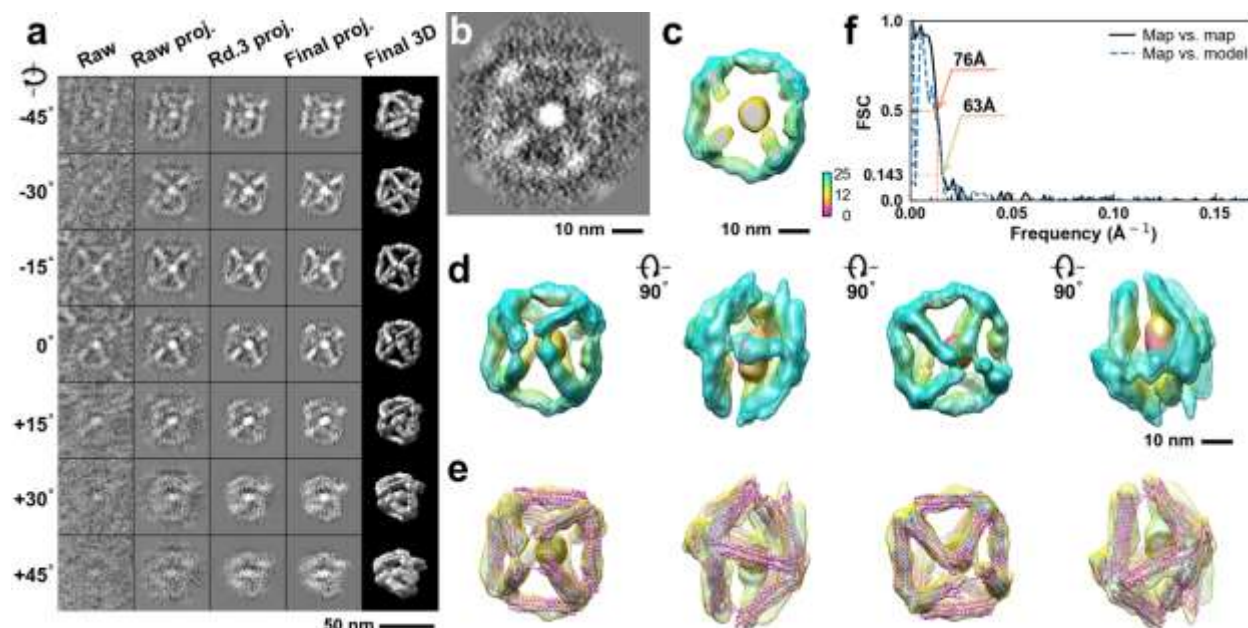

**Supplementary Fig. 193: IPET 3D reconstruction and model fitting of an individual unit-cell particle (Index: 185) within a 2D lattice with 70% ferritin loading.** **a**, Seven representative tilt images of a single unit-cell particle are shown in the first column (from left). The tilt images are aligned to a common center using IPET through iterative refinement. The projections of the raw, intermediate, and final 3D reconstruction at the corresponding angles are displayed in the subsequent four columns. **b**, A central cross-section (~23 nm thick) of the final reconstruction before masking is applied. **c**, 3D views of the central cross-section. **d**, Final 3D density map of this particle, viewed from four perpendicular directions. **e**, Final 3D reconstruction superimposed with the fitted model, viewed from four perpendicular directions. **f**, FSC analyses of the final map resolution using two methods: map-map FSC, where each map is reconstructed from one half of the images (even vs. odd tilt angle indices), and map-model FSC, where the model map is generated from the fitted model. Resolution assessments are provided based on tilt-based map-map and map-model FSC analyses at thresholds of FSC=0.5 and 0.143, respectively.



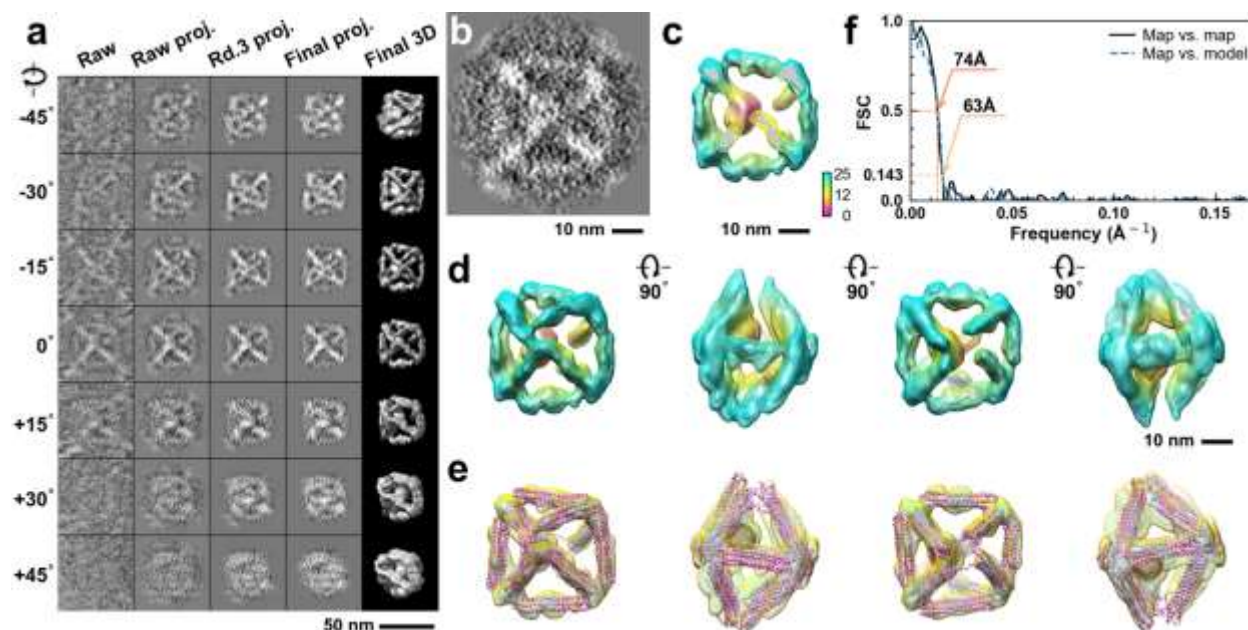

**Supplementary Fig. 194: IPET 3D reconstruction and model fitting of an individual unit-cell particle (Index: 186) within a 2D lattice with 70% ferritin loading.** **a**, Seven representative tilt images of a single unit-cell particle are shown in the first column (from left). The tilt images are aligned to a common center using IPET through iterative refinement. The projections of the raw, intermediate, and final 3D reconstruction at the corresponding angles are displayed in the subsequent four columns. **b**, A central cross-section (~23 nm thick) of the final reconstruction before masking is applied. **c**, 3D views of the central cross-section. **d**, Final 3D density map of this particle, viewed from four perpendicular directions. **e**, Final 3D reconstruction superimposed with the fitted model, viewed from four perpendicular directions. **f**, FSC analyses of the final map resolution using two methods: map-map FSC, where each map is reconstructed from one half of the images (even vs. odd tilt angle indices), and map-model FSC, where the model map is generated from the fitted model. Resolution assessments are provided based on tilt-based map-map and map-model FSC analyses at thresholds of FSC=0.5 and 0.143, respectively.

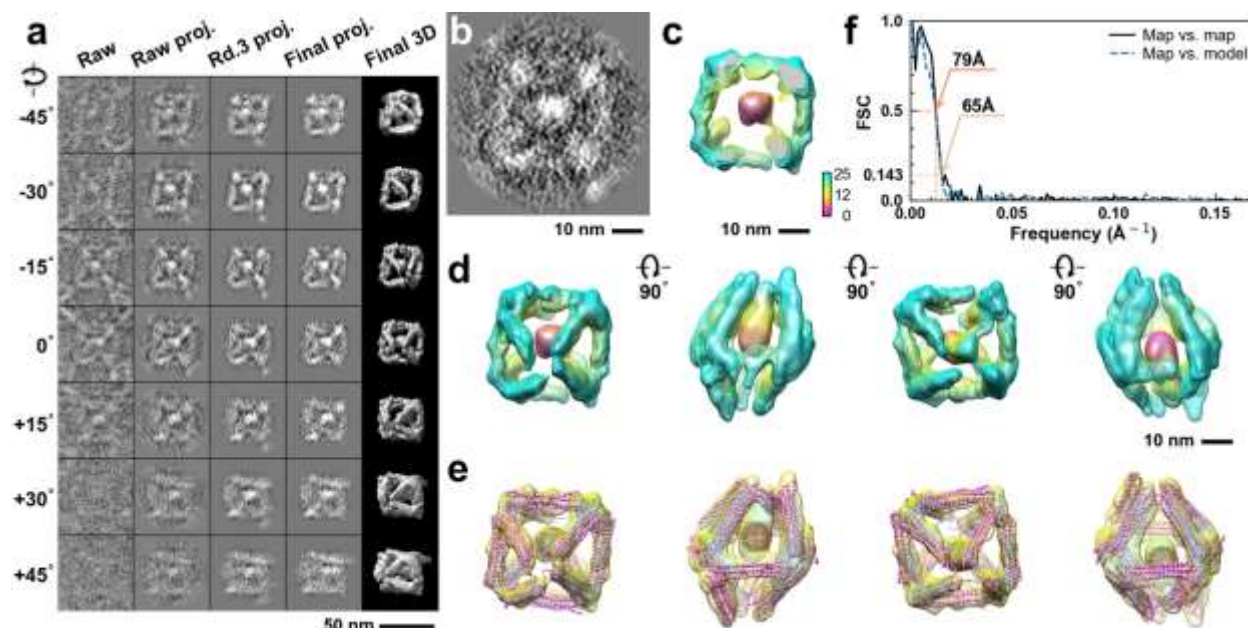

**Supplementary Fig. 195: IPET 3D reconstruction and model fitting of an individual unit-cell particle (Index: 187) within a 2D lattice with 70% ferritin loading.** **a**, Seven representative tilt images of a single unit-cell particle are shown in the first column (from left). The tilt images are aligned to a common center using IPET through iterative refinement. The projections of the raw, intermediate, and final 3D reconstruction at the corresponding angles are displayed in the subsequent four columns. **b**, A central cross-section (~23 nm thick) of the final reconstruction before masking is applied. **c**, 3D views of the central cross-section. **d**, Final 3D density map of this particle, viewed from four perpendicular directions. **e**, Final 3D reconstruction superimposed with the fitted model, viewed from four perpendicular directions. **f**, FSC analyses of the final map resolution using two methods: map-map FSC, where each map is reconstructed from one half of the images (even vs. odd tilt angle indices), and map-model FSC, where the model map is generated from the fitted model. Resolution assessments are provided based on tilt-based map-map and map-model FSC analyses at thresholds of FSC=0.5 and 0.143, respectively.

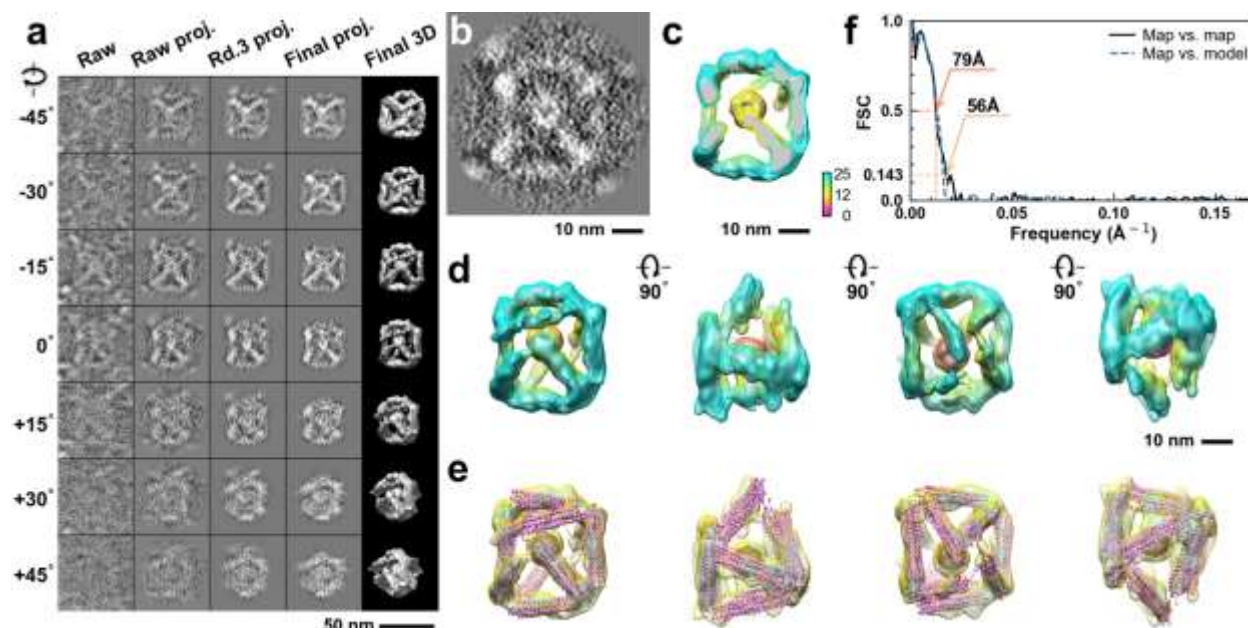

**Supplementary Fig. 196: IPET 3D reconstruction and model fitting of an individual unit-cell particle (Index: 188) within a 2D lattice with 70% ferritin loading.** **a**, Seven representative tilt images of a single unit-cell particle are shown in the first column (from left). The tilt images are aligned to a common center using IPET through iterative refinement. The projections of the raw, intermediate, and final 3D reconstruction at the corresponding angles are displayed in the subsequent four columns. **b**, A central cross-section (~23 nm thick) of the final reconstruction before masking is applied. **c**, 3D views of the central cross-section. **d**, Final 3D density map of this particle, viewed from four perpendicular directions. **e**, Final 3D reconstruction superimposed with the fitted model, viewed from four perpendicular directions. **f**, FSC analyses of the final map resolution using two methods: map-map FSC, where each map is reconstructed from one half of the images (even vs. odd tilt angle indices), and map-model FSC, where the model map is generated from the fitted model. Resolution assessments are provided based on tilt-based map-map and map-model FSC analyses at thresholds of FSC=0.5 and 0.143, respectively.

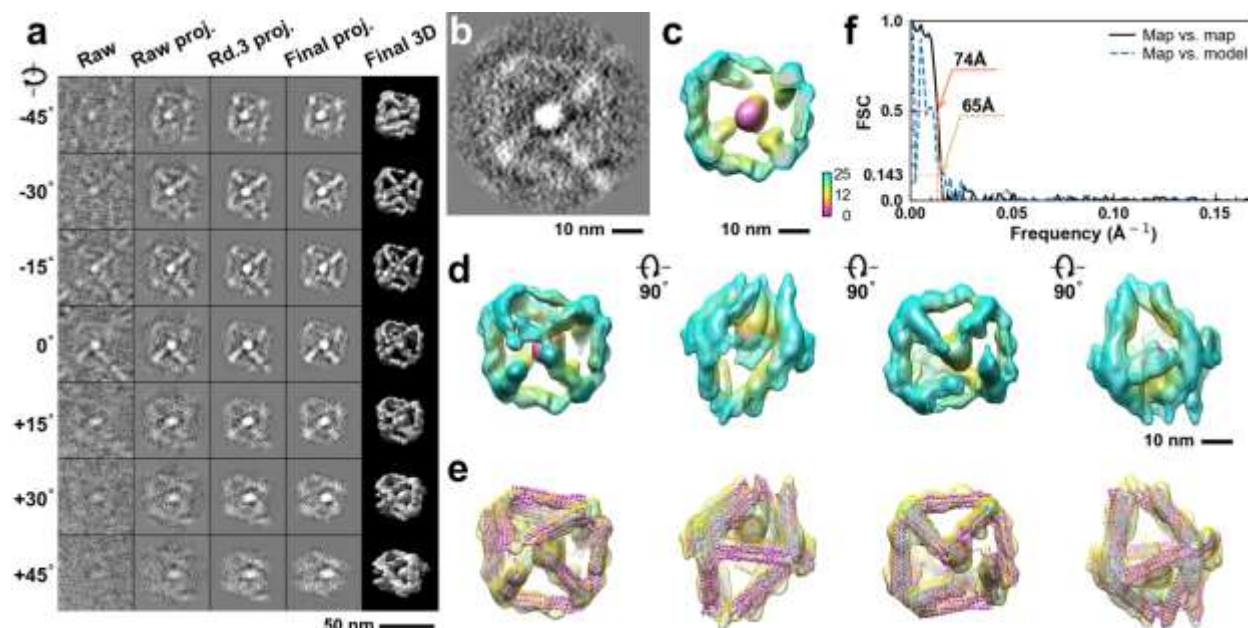

**Supplementary Fig. 197: IPET 3D reconstruction and model fitting of an individual unit-cell particle (Index: 189) within a 2D lattice with 70% ferritin loading.** **a**, Seven representative tilt images of a single unit-cell particle are shown in the first column (from left). The tilt images are aligned to a common center using IPET through iterative refinement. The projections of the raw, intermediate, and final 3D reconstruction at the corresponding angles are displayed in the subsequent four columns. **b**, A central cross-section (~23 nm thick) of the final reconstruction before masking is applied. **c**, 3D views of the central cross-section. **d**, Final 3D density map of this particle, viewed from four perpendicular directions. **e**, Final 3D reconstruction superimposed with the fitted model, viewed from four perpendicular directions. **f**, FSC analyses of the final map resolution using two methods: map-map FSC, where each map is reconstructed from one half of the images (even vs. odd tilt angle indices), and map-model FSC, where the model map is generated from the fitted model. Resolution assessments are provided based on tilt-based map-map and map-model FSC analyses at thresholds of FSC=0.5 and 0.143, respectively.



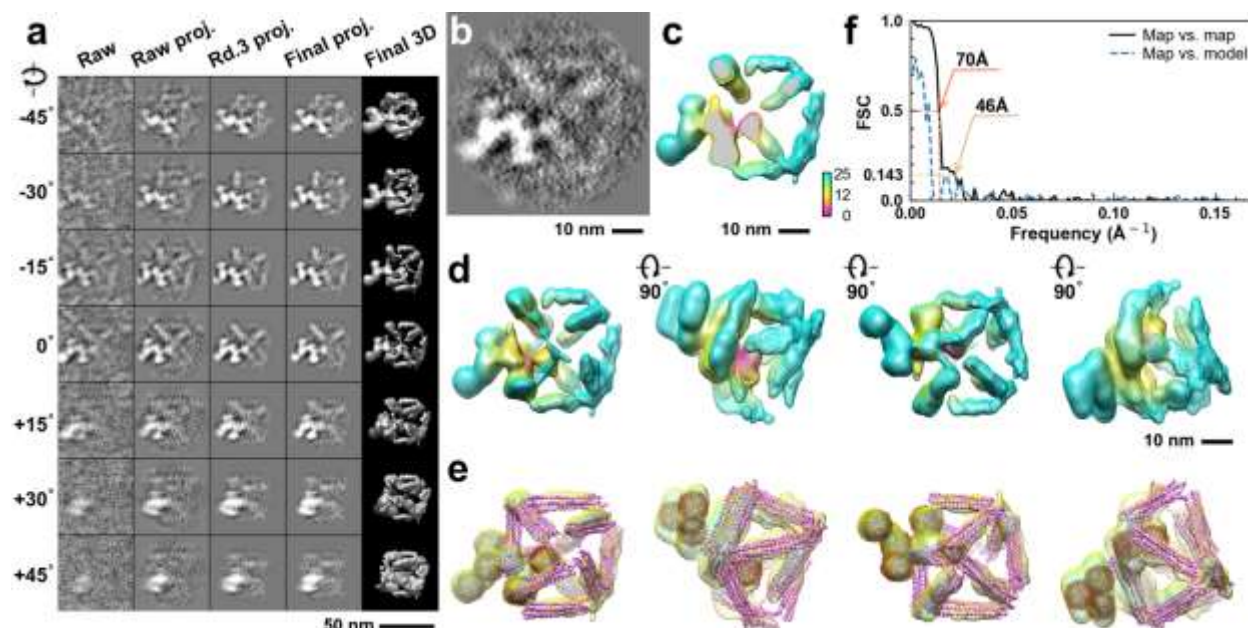

**Supplementary Fig. 198: IPET 3D reconstruction and model fitting of an individual unit-cell particle (Index: 190) within a 2D lattice with 70% ferritin loading.** **a**, Seven representative tilt images of a single unit-cell particle are shown in the first column (from left). The tilt images are aligned to a common center using IPET through iterative refinement. The projections of the raw, intermediate, and final 3D reconstruction at the corresponding angles are displayed in the subsequent four columns. **b**, A central cross-section (~23 nm thick) of the final reconstruction before masking is applied. **c**, 3D views of the central cross-section. **d**, Final 3D density map of this particle, viewed from four perpendicular directions. **e**, Final 3D reconstruction superimposed with the fitted model, viewed from four perpendicular directions. **f**, FSC analyses of the final map resolution using two methods: map-map FSC, where each map is reconstructed from one half of the images (even vs. odd tilt angle indices), and map-model FSC, where the model map is generated from the fitted model. Resolution assessments are provided based on tilt-based map-map and map-model FSC analyses at thresholds of FSC=0.5 and 0.143, respectively.

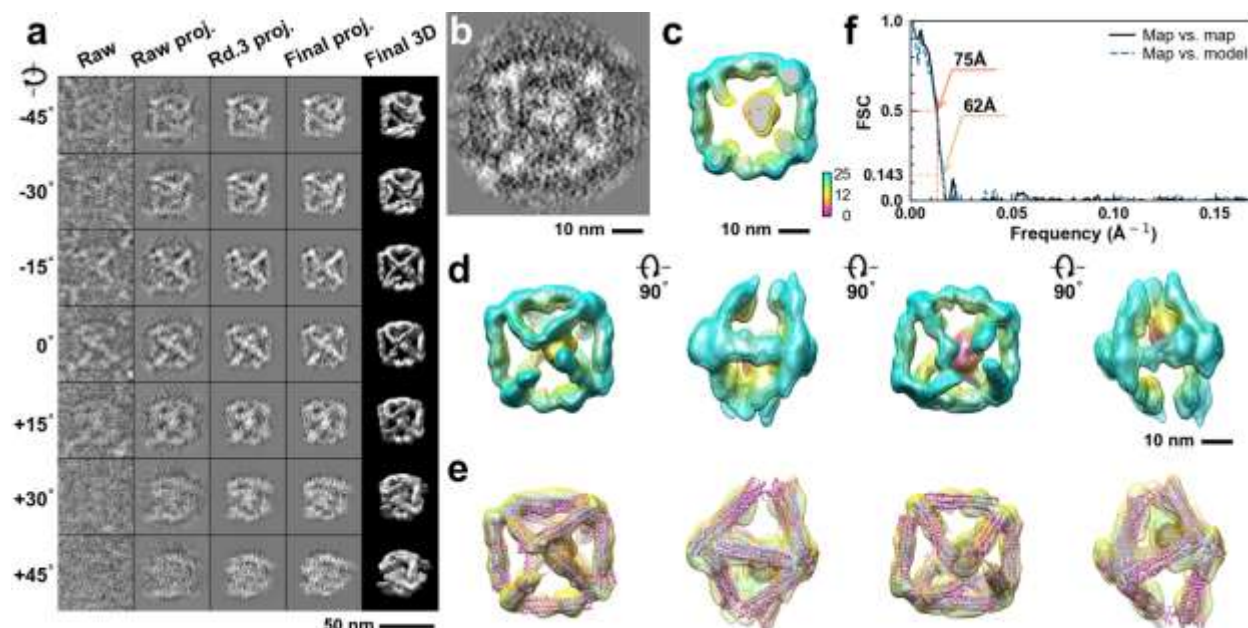

**Supplementary Fig. 199: IPET 3D reconstruction and model fitting of an individual unit-cell particle (Index: 191) within a 2D lattice with 70% ferritin loading.** **a**, Seven representative tilt images of a single unit-cell particle are shown in the first column (from left). The tilt images are aligned to a common center using IPET through iterative refinement. The projections of the raw, intermediate, and final 3D reconstruction at the corresponding angles are displayed in the subsequent four columns. **b**, A central cross-section (~23 nm thick) of the final reconstruction before masking is applied. **c**, 3D views of the central cross-section. **d**, Final 3D density map of this particle, viewed from four perpendicular directions. **e**, Final 3D reconstruction superimposed with the fitted model, viewed from four perpendicular directions. **f**, FSC analyses of the final map resolution using two methods: map-map FSC, where each map is reconstructed from one half of the images (even vs. odd tilt angle indices), and map-model FSC, where the model map is generated from the fitted model. Resolution assessments are provided based on tilt-based map-map and map-model FSC analyses at thresholds of FSC=0.5 and 0.143, respectively.

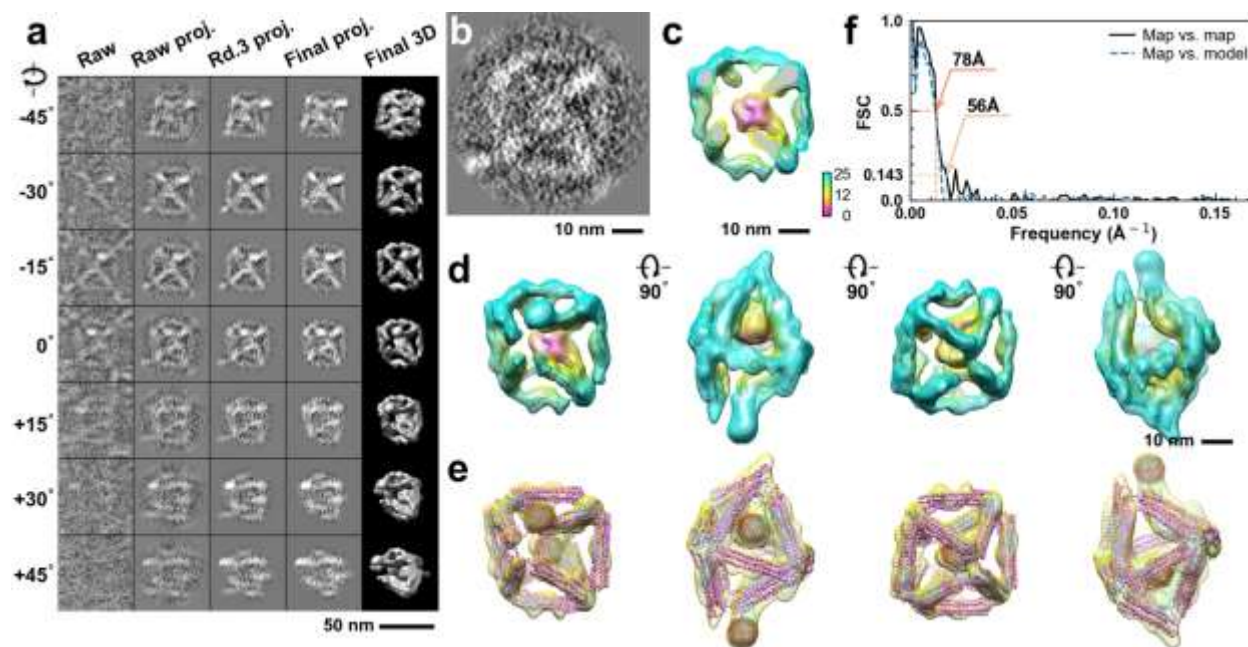

**Supplementary Fig. 200: IPET 3D reconstruction and model fitting of an individual unit-cell particle (Index: 192) within a 2D lattice with 70% ferritin loading.** **a**, Seven representative tilt images of a single unit-cell particle are shown in the first column (from left). The tilt images are aligned to a common center using IPET through iterative refinement. The projections of the raw, intermediate, and final 3D reconstruction at the corresponding angles are displayed in the subsequent four columns. **b**, A central cross-section (~23 nm thick) of the final reconstruction before masking is applied. **c**, 3D views of the central cross-section. **d**, Final 3D density map of this particle, viewed from four perpendicular directions. **e**, Final 3D reconstruction superimposed with the fitted model, viewed from four perpendicular directions. **f**, FSC analyses of the final map resolution using two methods: map-map FSC, where each map is reconstructed from one half of the images (even vs. odd tilt angle indices), and map-model FSC, where the model map is generated from the fitted model. Resolution assessments are provided based on tilt-based map-map and map-model FSC analyses at thresholds of FSC=0.5 and 0.143, respectively.

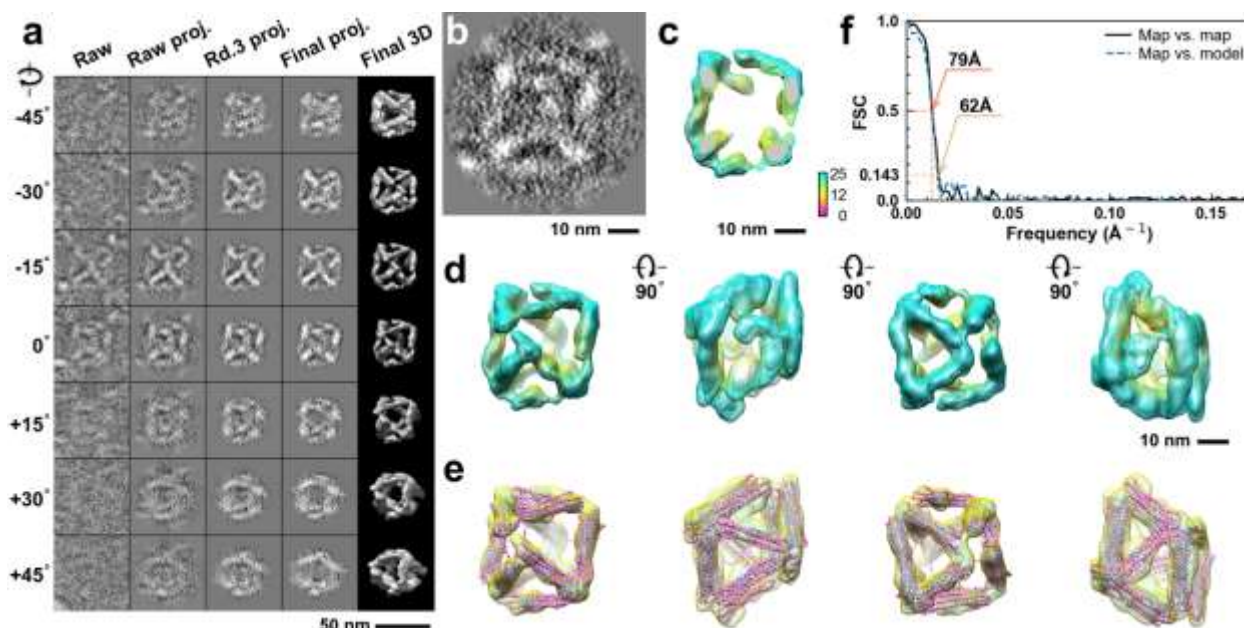

**Supplementary Fig. 201: IPET 3D reconstruction and model fitting of an individual unit-cell particle (Index: 193) within a 2D lattice with 70% ferritin loading.** **a**, Seven representative tilt images of a single unit-cell particle are shown in the first column (from left). The tilt images are aligned to a common center using IPET through iterative refinement. The projections of the raw, intermediate, and final 3D reconstruction at the corresponding angles are displayed in the subsequent four columns. **b**, A central cross-section (~23 nm thick) of the final reconstruction before masking is applied. **c**, 3D views of the central cross-section. **d**, Final 3D density map of this particle, viewed from four perpendicular directions. **e**, Final 3D reconstruction superimposed with the fitted model, viewed from four perpendicular directions. **f**, FSC analyses of the final map resolution using two methods: map-map FSC, where each map is reconstructed from one half of the images (even vs. odd tilt angle indices), and map-model FSC, where the model map is generated from the fitted model. Resolution assessments are provided based on tilt-based map-map and map-model FSC analyses at thresholds of FSC=0.5 and 0.143, respectively.



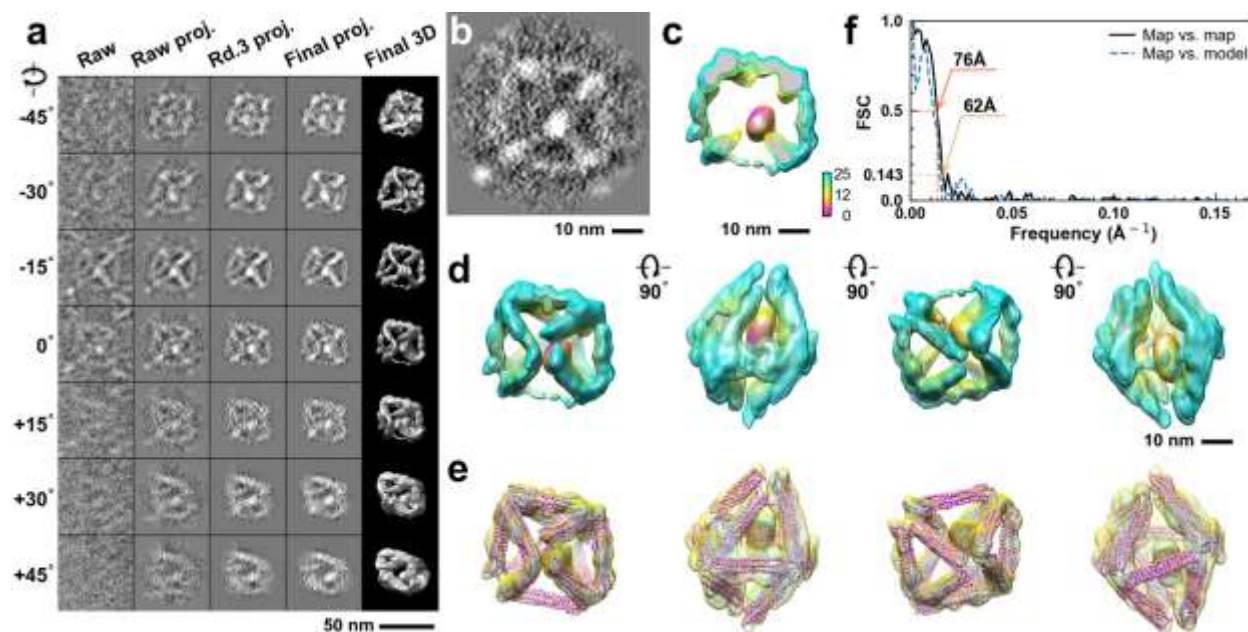

**Supplementary Fig. 202: IPET 3D reconstruction and model fitting of an individual unit-cell particle (Index: 194) within a 2D lattice with 70% ferritin loading.** **a**, Seven representative tilt images of a single unit-cell particle are shown in the first column (from left). The tilt images are aligned to a common center using IPET through iterative refinement. The projections of the raw, intermediate, and final 3D reconstruction at the corresponding angles are displayed in the subsequent four columns. **b**, A central cross-section (~23 nm thick) of the final reconstruction before masking is applied. **c**, 3D views of the central cross-section. **d**, Final 3D density map of this particle, viewed from four perpendicular directions. **e**, Final 3D reconstruction superimposed with the fitted model, viewed from four perpendicular directions. **f**, FSC analyses of the final map resolution using two methods: map-map FSC, where each map is reconstructed from one half of the images (even vs. odd tilt angle indices), and map-model FSC, where the model map is generated from the fitted model. Resolution assessments are provided based on tilt-based map-map and map-model FSC analyses at thresholds of FSC=0.5 and 0.143, respectively.

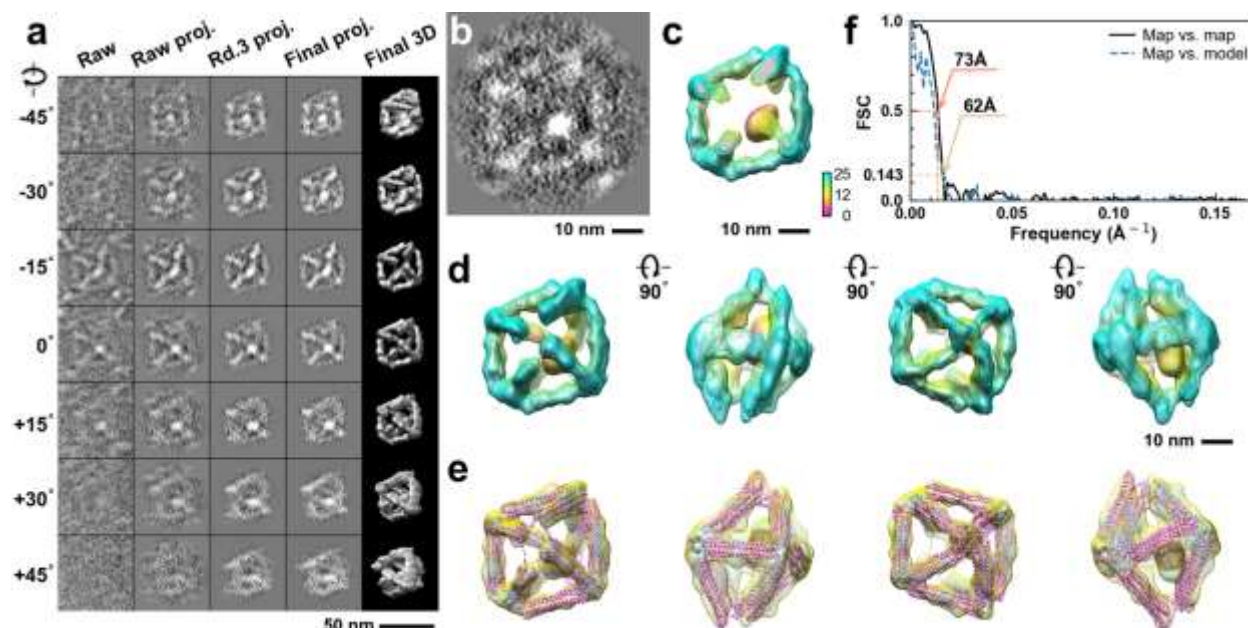

**Supplementary Fig. 203: IPET 3D reconstruction and model fitting of an individual unit-cell particle (Index: 195) within a 2D lattice with 70% ferritin loading.** **a**, Seven representative tilt images of a single unit-cell particle are shown in the first column (from left). The tilt images are aligned to a common center using IPET through iterative refinement. The projections of the raw, intermediate, and final 3D reconstruction at the corresponding angles are displayed in the subsequent four columns. **b**, A central cross-section (~23 nm thick) of the final reconstruction before masking is applied. **c**, 3D views of the central cross-section. **d**, Final 3D density map of this particle, viewed from four perpendicular directions. **e**, Final 3D reconstruction superimposed with the fitted model, viewed from four perpendicular directions. **f**, FSC analyses of the final map resolution using two methods: map-map FSC, where each map is reconstructed from one half of the images (even vs. odd tilt angle indices), and map-model FSC, where the model map is generated from the fitted model. Resolution assessments are provided based on tilt-based map-map and map-model FSC analyses at thresholds of FSC=0.5 and 0.143, respectively.

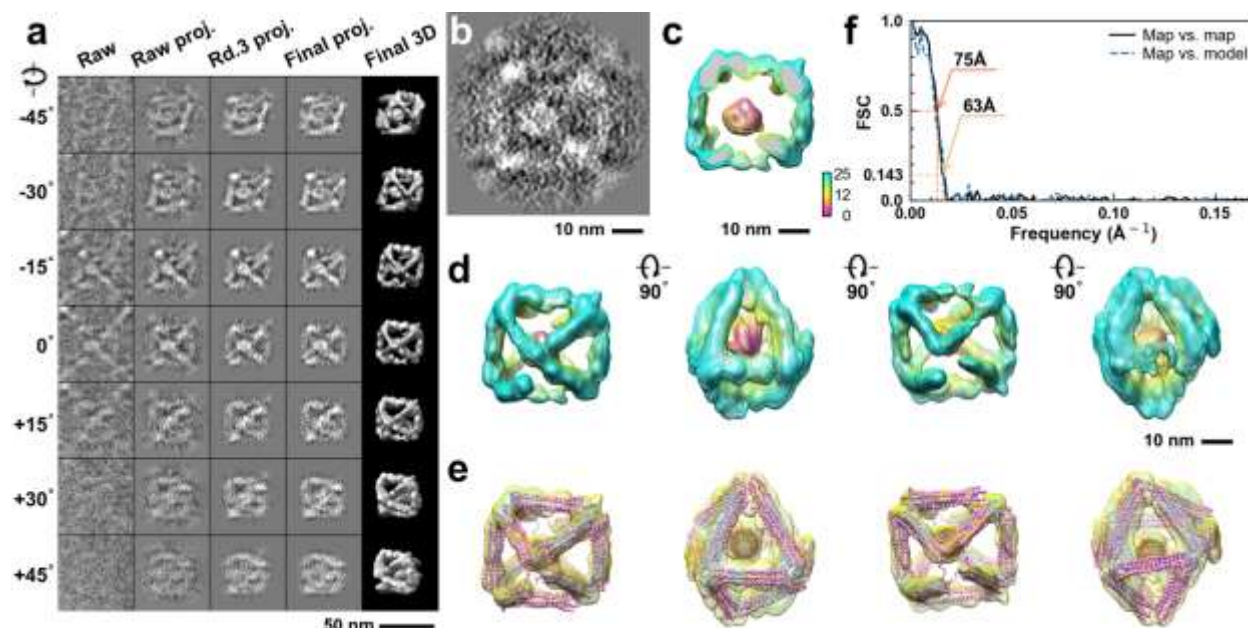

**Supplementary Fig. 204: IPET 3D reconstruction and model fitting of an individual unit-cell particle (Index: 196) within a 2D lattice with 70% ferritin loading.** **a**, Seven representative tilt images of a single unit-cell particle are shown in the first column (from left). The tilt images are aligned to a common center using IPET through iterative refinement. The projections of the raw, intermediate, and final 3D reconstruction at the corresponding angles are displayed in the subsequent four columns. **b**, A central cross-section (~23 nm thick) of the final reconstruction before masking is applied. **c**, 3D views of the central cross-section. **d**, Final 3D density map of this particle, viewed from four perpendicular directions. **e**, Final 3D reconstruction superimposed with the fitted model, viewed from four perpendicular directions. **f**, FSC analyses of the final map resolution using two methods: map-map FSC, where each map is reconstructed from one half of the images (even vs. odd tilt angle indices), and map-model FSC, where the model map is generated from the fitted model. Resolution assessments are provided based on tilt-based map-map and map-model FSC analyses at thresholds of FSC=0.5 and 0.143, respectively.

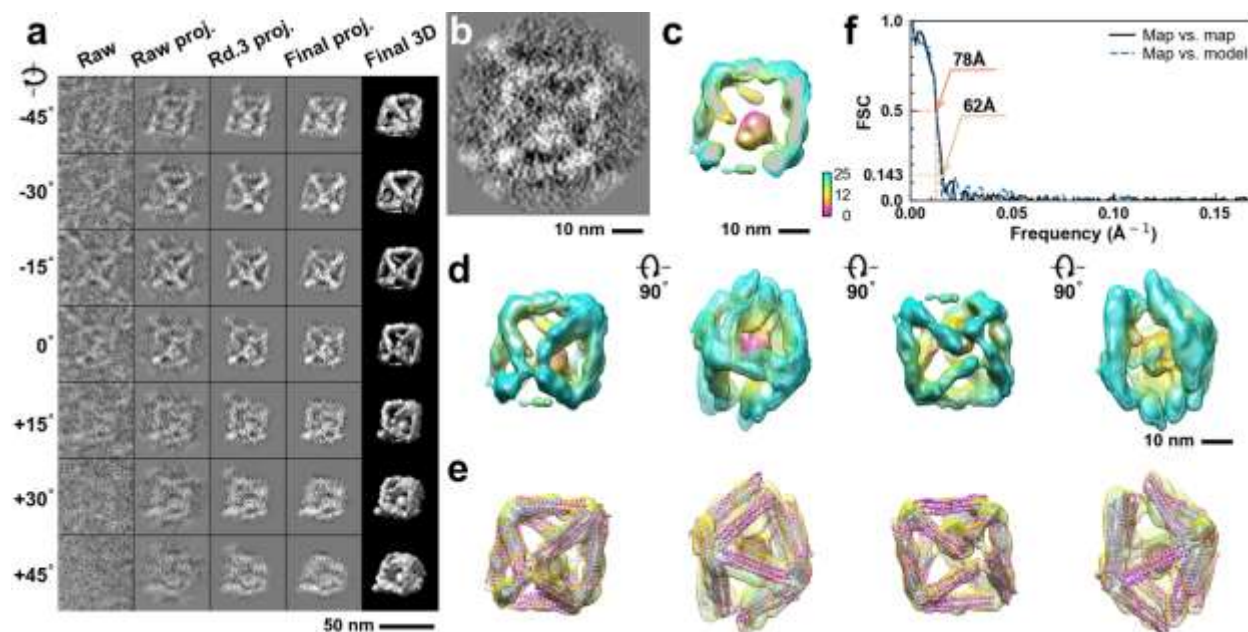

**Supplementary Fig. 205: IPET 3D reconstruction and model fitting of an individual unit-cell particle (Index: 197) within a 2D lattice with 70% ferritin loading.** **a**, Seven representative tilt images of a single unit-cell particle are shown in the first column (from left). The tilt images are aligned to a common center using IPET through iterative refinement. The projections of the raw, intermediate, and final 3D reconstruction at the corresponding angles are displayed in the subsequent four columns. **b**, A central cross-section (~23 nm thick) of the final reconstruction before masking is applied. **c**, 3D views of the central cross-section. **d**, Final 3D density map of this particle, viewed from four perpendicular directions. **e**, Final 3D reconstruction superimposed with the fitted model, viewed from four perpendicular directions. **f**, FSC analyses of the final map resolution using two methods: map-map FSC, where each map is reconstructed from one half of the images (even vs. odd tilt angle indices), and map-model FSC, where the model map is generated from the fitted model. Resolution assessments are provided based on tilt-based map-map and map-model FSC analyses at thresholds of FSC=0.5 and 0.143, respectively.



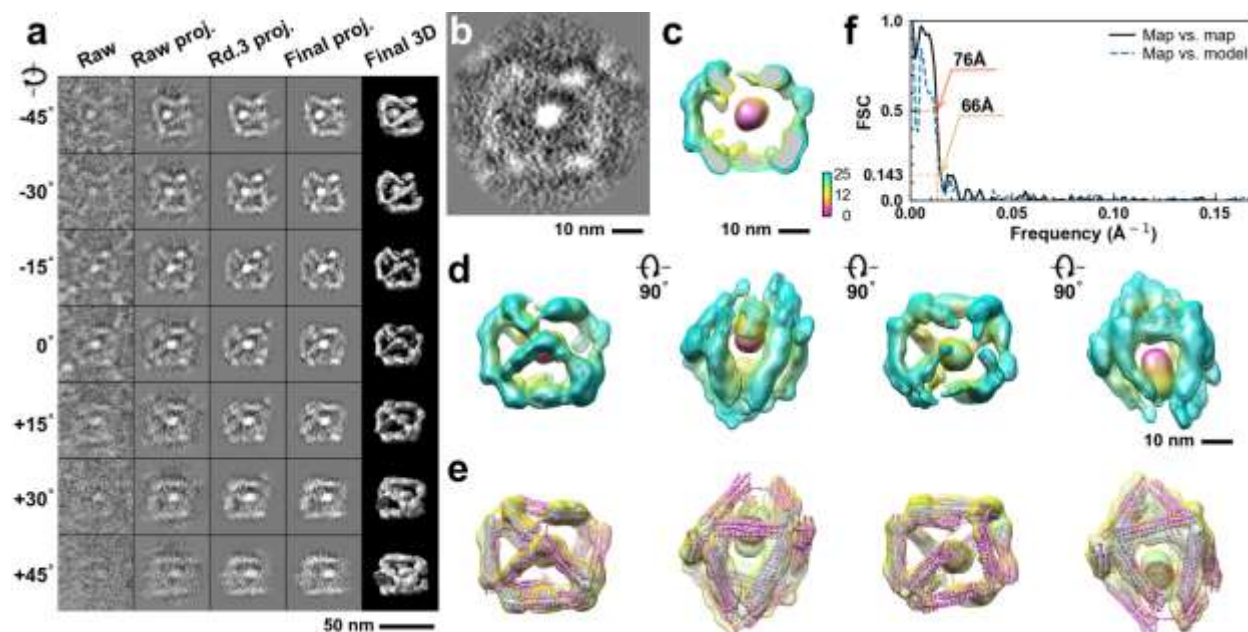

**Supplementary Fig. 206: IPET 3D reconstruction and model fitting of an individual unit-cell particle (Index: 198) within a 2D lattice with 70% ferritin loading.** **a**, Seven representative tilt images of a single unit-cell particle are shown in the first column (from left). The tilt images are aligned to a common center using IPET through iterative refinement. The projections of the raw, intermediate, and final 3D reconstruction at the corresponding angles are displayed in the subsequent four columns. **b**, A central cross-section (~23 nm thick) of the final reconstruction before masking is applied. **c**, 3D views of the central cross-section. **d**, Final 3D density map of this particle, viewed from four perpendicular directions. **e**, Final 3D reconstruction superimposed with the fitted model, viewed from four perpendicular directions. **f**, FSC analyses of the final map resolution using two methods: map-map FSC, where each map is reconstructed from one half of the images (even vs. odd tilt angle indices), and map-model FSC, where the model map is generated from the fitted model. Resolution assessments are provided based on tilt-based map-map and map-model FSC analyses at thresholds of FSC=0.5 and 0.143, respectively.

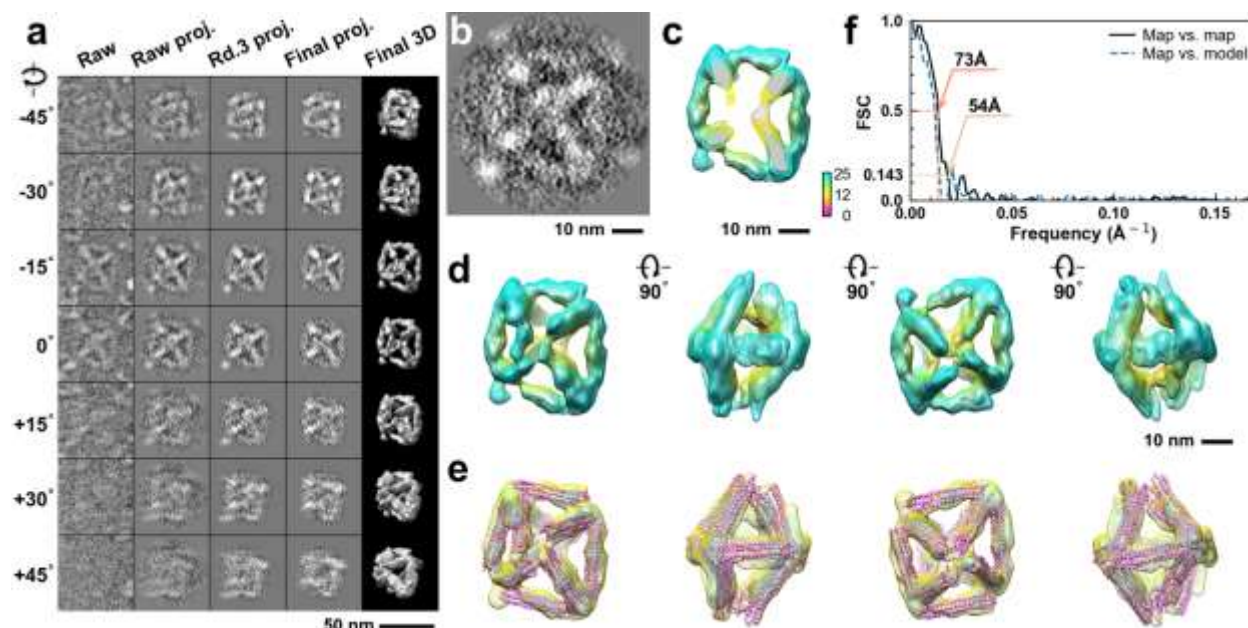

**Supplementary Fig. 207: IPET 3D reconstruction and model fitting of an individual unit-cell particle (Index: 199) within a 2D lattice with 70% ferritin loading.** **a**, Seven representative tilt images of a single unit-cell particle are shown in the first column (from left). The tilt images are aligned to a common center using IPET through iterative refinement. The projections of the raw, intermediate, and final 3D reconstruction at the corresponding angles are displayed in the subsequent four columns. **b**, A central cross-section (~23 nm thick) of the final reconstruction before masking is applied. **c**, 3D views of the central cross-section. **d**, Final 3D density map of this particle, viewed from four perpendicular directions. **e**, Final 3D reconstruction superimposed with the fitted model, viewed from four perpendicular directions. **f**, FSC analyses of the final map resolution using two methods: map-map FSC, where each map is reconstructed from one half of the images (even vs. odd tilt angle indices), and map-model FSC, where the model map is generated from the fitted model. Resolution assessments are provided based on tilt-based map-map and map-model FSC analyses at thresholds of FSC=0.5 and 0.143, respectively.

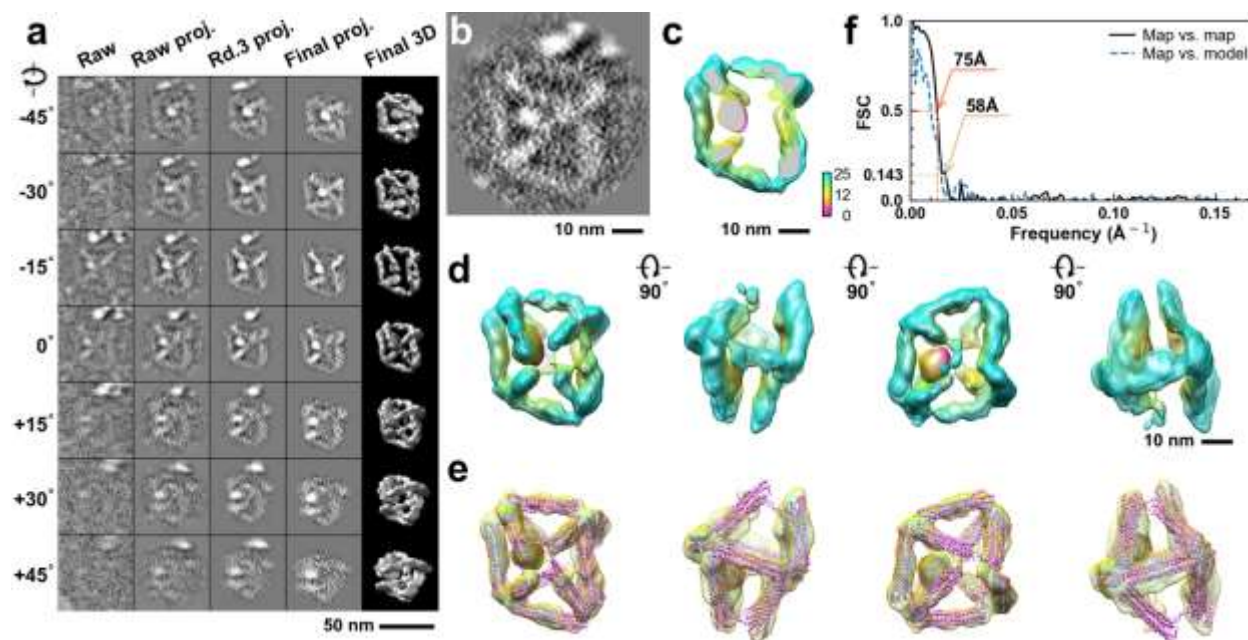

**Supplementary Fig. 208: IPET 3D reconstruction and model fitting of an individual unit-cell particle (Index: 200) within a 2D lattice with 70% ferritin loading.** **a**, Seven representative tilt images of a single unit-cell particle are shown in the first column (from left). The tilt images are aligned to a common center using IPET through iterative refinement. The projections of the raw, intermediate, and final 3D reconstruction at the corresponding angles are displayed in the subsequent four columns. **b**, A central cross-section (~23 nm thick) of the final reconstruction before masking is applied. **c**, 3D views of the central cross-section. **d**, Final 3D density map of this particle, viewed from four perpendicular directions. **e**, Final 3D reconstruction superimposed with the fitted model, viewed from four perpendicular directions. **f**, FSC analyses of the final map resolution using two methods: map-map FSC, where each map is reconstructed from one half of the images (even vs. odd tilt angle indices), and map-model FSC, where the model map is generated from the fitted model. Resolution assessments are provided based on tilt-based map-map and map-model FSC analyses at thresholds of FSC=0.5 and 0.143, respectively.

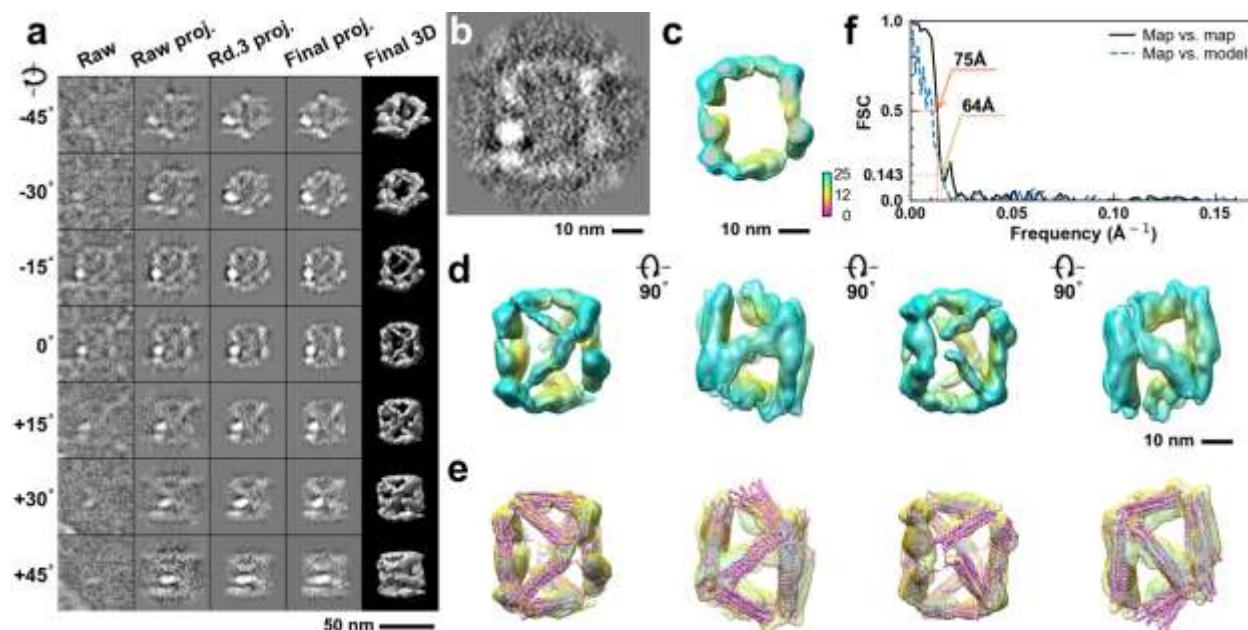

**Supplementary Fig. 209: IPET 3D reconstruction and model fitting of an individual unit-cell particle (Index: 201) within a 2D lattice with 70% ferritin loading.** **a**, Seven representative tilt images of a single unit-cell particle are shown in the first column (from left). The tilt images are aligned to a common center using IPET through iterative refinement. The projections of the raw, intermediate, and final 3D reconstruction at the corresponding angles are displayed in the subsequent four columns. **b**, A central cross-section (~23 nm thick) of the final reconstruction before masking is applied. **c**, 3D views of the central cross-section. **d**, Final 3D density map of this particle, viewed from four perpendicular directions. **e**, Final 3D reconstruction superimposed with the fitted model, viewed from four perpendicular directions. **f**, FSC analyses of the final map resolution using two methods: map-map FSC, where each map is reconstructed from one half of the images (even vs. odd tilt angle indices), and map-model FSC, where the model map is generated from the fitted model. Resolution assessments are provided based on tilt-based map-map and map-model FSC analyses at thresholds of FSC=0.5 and 0.143, respectively.



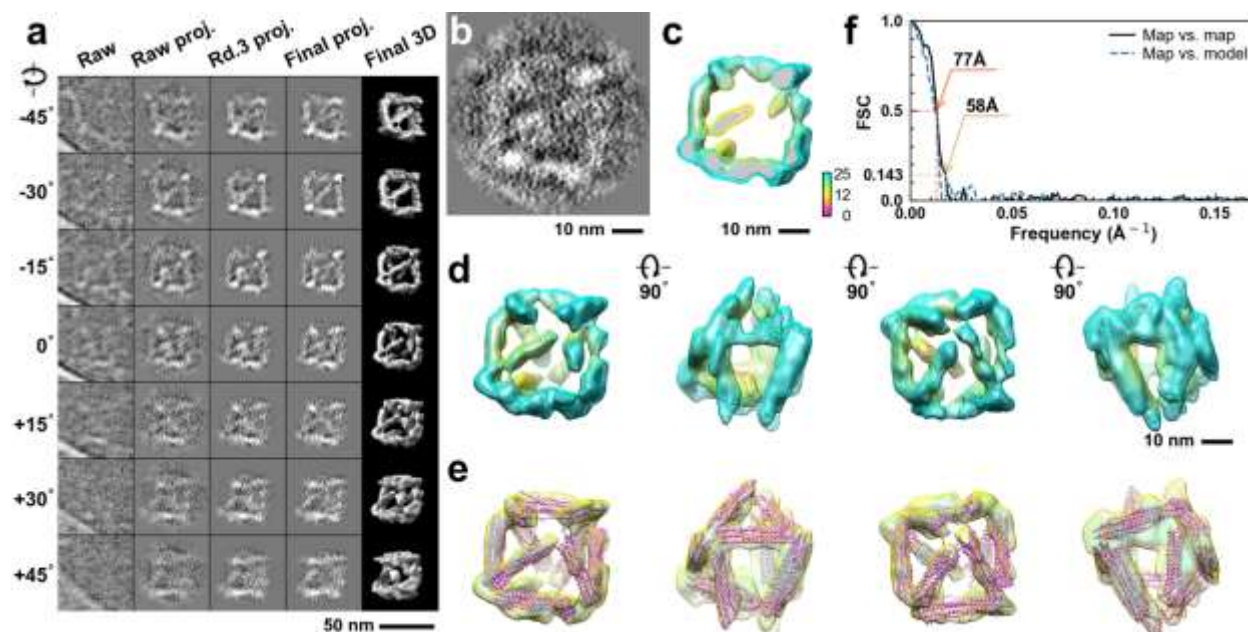

**Supplementary Fig. 210: IPET 3D reconstruction and model fitting of an individual unit-cell particle (Index: 202) within a 2D lattice with 70% ferritin loading.** **a**, Seven representative tilt images of a single unit-cell particle are shown in the first column (from left). The tilt images are aligned to a common center using IPET through iterative refinement. The projections of the raw, intermediate, and final 3D reconstruction at the corresponding angles are displayed in the subsequent four columns. **b**, A central cross-section (~23 nm thick) of the final reconstruction before masking is applied. **c**, 3D views of the central cross-section. **d**, Final 3D density map of this particle, viewed from four perpendicular directions. **e**, Final 3D reconstruction superimposed with the fitted model, viewed from four perpendicular directions. **f**, FSC analyses of the final map resolution using two methods: map-map FSC, where each map is reconstructed from one half of the images (even vs. odd tilt angle indices), and map-model FSC, where the model map is generated from the fitted model. Resolution assessments are provided based on tilt-based map-map and map-model FSC analyses at thresholds of FSC=0.5 and 0.143, respectively.

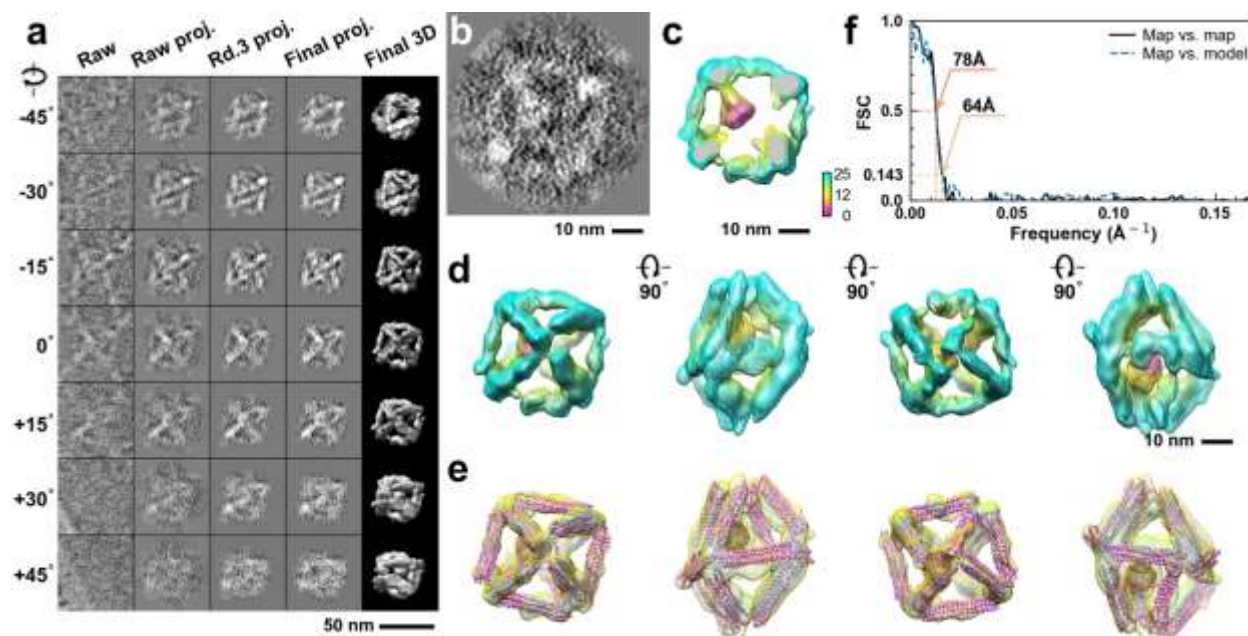

**Supplementary Fig. 211: IPET 3D reconstruction and model fitting of an individual unit-cell particle (Index: 203) within a 2D lattice with 70% ferritin loading.** **a**, Seven representative tilt images of a single unit-cell particle are shown in the first column (from left). The tilt images are aligned to a common center using IPET through iterative refinement. The projections of the raw, intermediate, and final 3D reconstruction at the corresponding angles are displayed in the subsequent four columns. **b**, A central cross-section (~23 nm thick) of the final reconstruction before masking is applied. **c**, 3D views of the central cross-section. **d**, Final 3D density map of this particle, viewed from four perpendicular directions. **e**, Final 3D reconstruction superimposed with the fitted model, viewed from four perpendicular directions. **f**, FSC analyses of the final map resolution using two methods: map-map FSC, where each map is reconstructed from one half of the images (even vs. odd tilt angle indices), and map-model FSC, where the model map is generated from the fitted model. Resolution assessments are provided based on tilt-based map-map and map-model FSC analyses at thresholds of FSC=0.5 and 0.143, respectively.

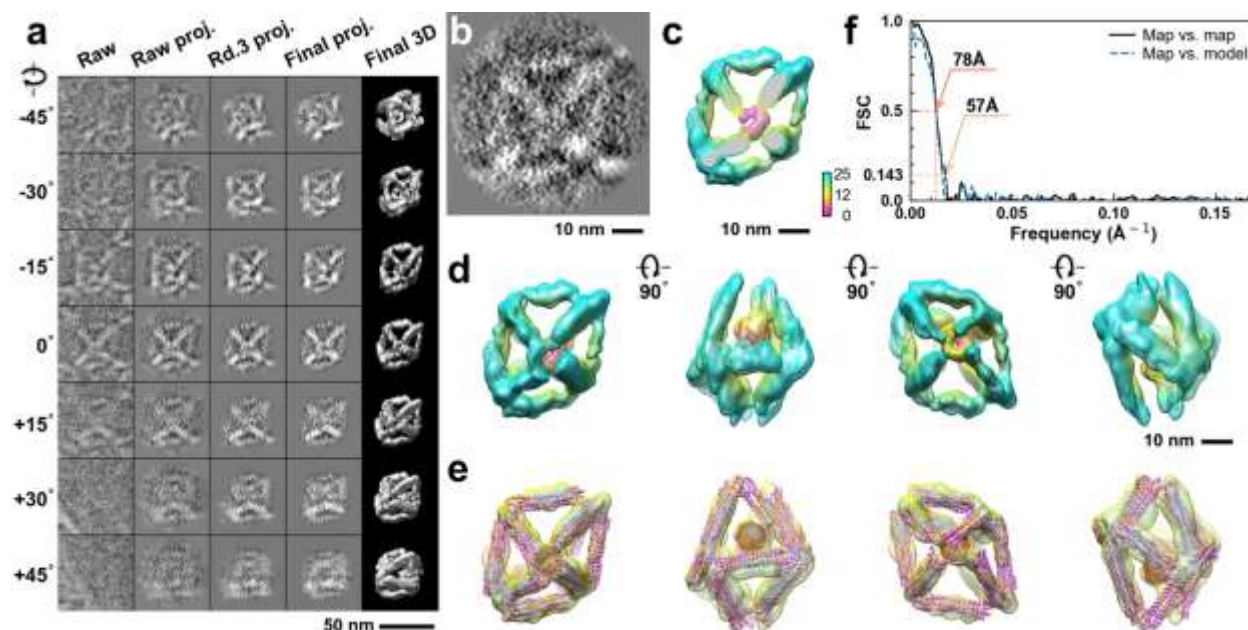

**Supplementary Fig. 212: IPET 3D reconstruction and model fitting of an individual unit-cell particle (Index: 204) within a 2D lattice with 70% ferritin loading.** **a**, Seven representative tilt images of a single unit-cell particle are shown in the first column (from left). The tilt images are aligned to a common center using IPET through iterative refinement. The projections of the raw, intermediate, and final 3D reconstruction at the corresponding angles are displayed in the subsequent four columns. **b**, A central cross-section (~23 nm thick) of the final reconstruction before masking is applied. **c**, 3D views of the central cross-section. **d**, Final 3D density map of this particle, viewed from four perpendicular directions. **e**, Final 3D reconstruction superimposed with the fitted model, viewed from four perpendicular directions. **f**, FSC analyses of the final map resolution using two methods: map-map FSC, where each map is reconstructed from one half of the images (even vs. odd tilt angle indices), and map-model FSC, where the model map is generated from the fitted model. Resolution assessments are provided based on tilt-based map-map and map-model FSC analyses at thresholds of FSC=0.5 and 0.143, respectively.

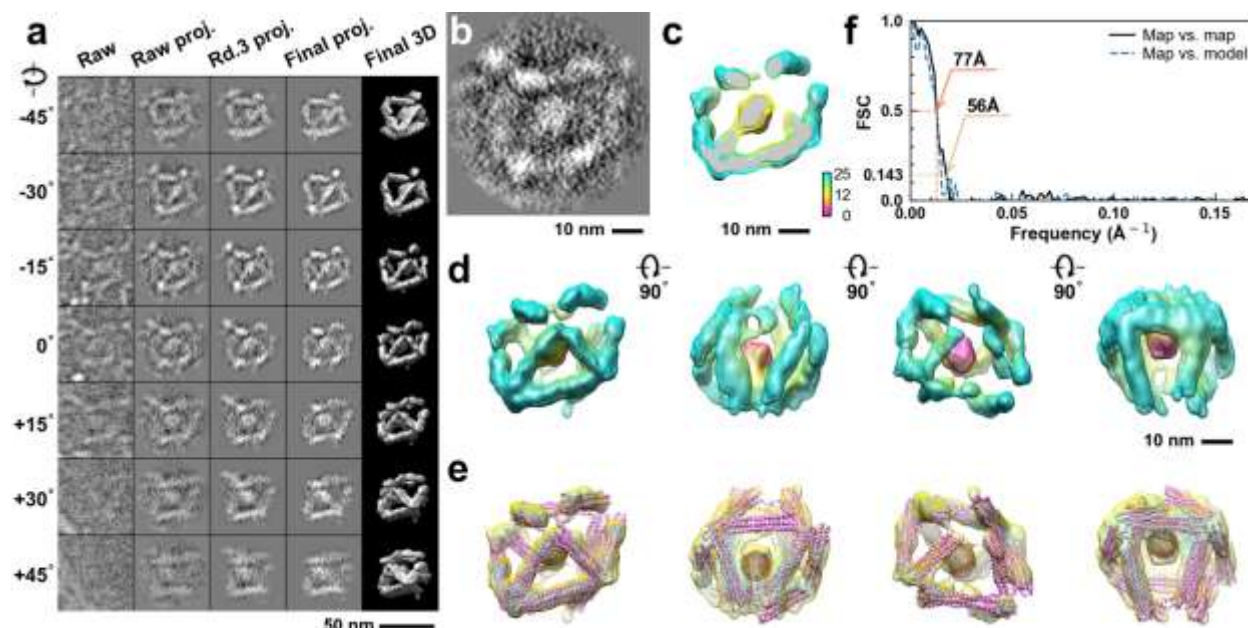

**Supplementary Fig. 213: IPET 3D reconstruction and model fitting of an individual unit-cell particle (Index: 205) within a 2D lattice with 70% ferritin loading.** **a**, Seven representative tilt images of a single unit-cell particle are shown in the first column (from left). The tilt images are aligned to a common center using IPET through iterative refinement. The projections of the raw, intermediate, and final 3D reconstruction at the corresponding angles are displayed in the subsequent four columns. **b**, A central cross-section (~23 nm thick) of the final reconstruction before masking is applied. **c**, 3D views of the central cross-section. **d**, Final 3D density map of this particle, viewed from four perpendicular directions. **e**, Final 3D reconstruction superimposed with the fitted model, viewed from four perpendicular directions. **f**, FSC analyses of the final map resolution using two methods: map-map FSC, where each map is reconstructed from one half of the images (even vs. odd tilt angle indices), and map-model FSC, where the model map is generated from the fitted model. Resolution assessments are provided based on tilt-based map-map and map-model FSC analyses at thresholds of FSC=0.5 and 0.143, respectively.



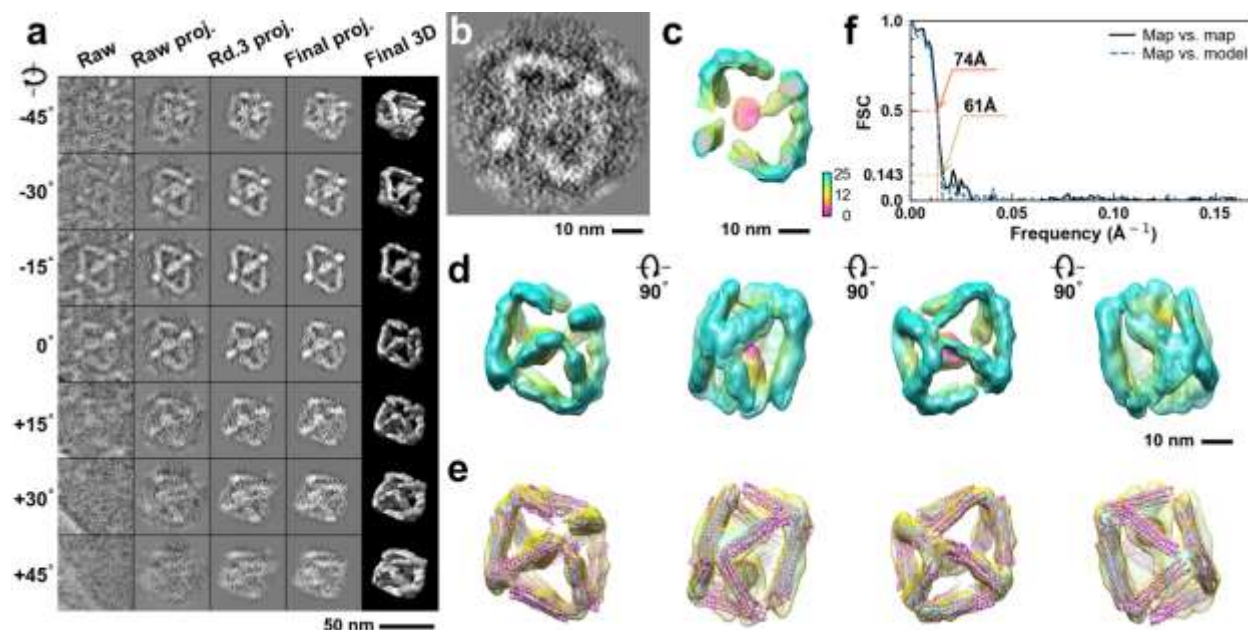

**Supplementary Fig. 214: IPET 3D reconstruction and model fitting of an individual unit-cell particle (Index: 206) within a 2D lattice with 70% ferritin loading.** **a**, Seven representative tilt images of a single unit-cell particle are shown in the first column (from left). The tilt images are aligned to a common center using IPET through iterative refinement. The projections of the raw, intermediate, and final 3D reconstruction at the corresponding angles are displayed in the subsequent four columns. **b**, A central cross-section (~23 nm thick) of the final reconstruction before masking is applied. **c**, 3D views of the central cross-section. **d**, Final 3D density map of this particle, viewed from four perpendicular directions. **e**, Final 3D reconstruction superimposed with the fitted model, viewed from four perpendicular directions. **f**, FSC analyses of the final map resolution using two methods: map-map FSC, where each map is reconstructed from one half of the images (even vs. odd tilt angle indices), and map-model FSC, where the model map is generated from the fitted model. Resolution assessments are provided based on tilt-based map-map and map-model FSC analyses at thresholds of FSC=0.5 and 0.143, respectively.

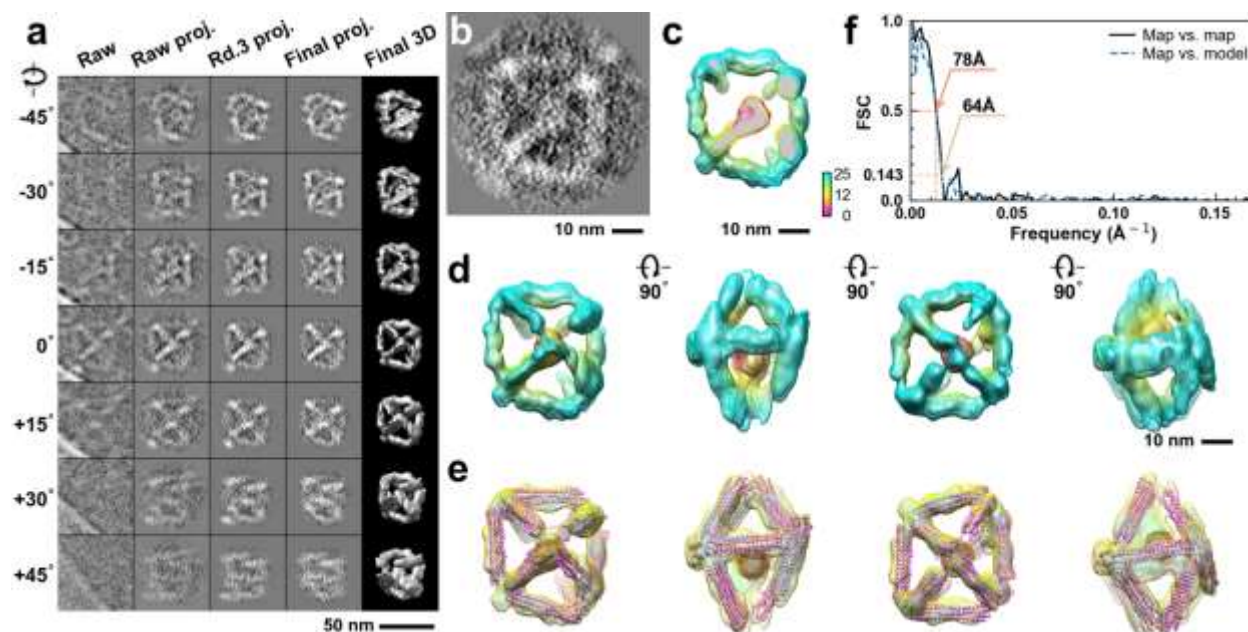

**Supplementary Fig. 215: IPET 3D reconstruction and model fitting of an individual unit-cell particle (Index: 207) within a 2D lattice with 70% ferritin loading.** **a**, Seven representative tilt images of a single unit-cell particle are shown in the first column (from left). The tilt images are aligned to a common center using IPET through iterative refinement. The projections of the raw, intermediate, and final 3D reconstruction at the corresponding angles are displayed in the subsequent four columns. **b**, A central cross-section (~23 nm thick) of the final reconstruction before masking is applied. **c**, 3D views of the central cross-section. **d**, Final 3D density map of this particle, viewed from four perpendicular directions. **e**, Final 3D reconstruction superimposed with the fitted model, viewed from four perpendicular directions. **f**, FSC analyses of the final map resolution using two methods: map-map FSC, where each map is reconstructed from one half of the images (even vs. odd tilt angle indices), and map-model FSC, where the model map is generated from the fitted model. Resolution assessments are provided based on tilt-based map-map and map-model FSC analyses at thresholds of FSC=0.5 and 0.143, respectively.

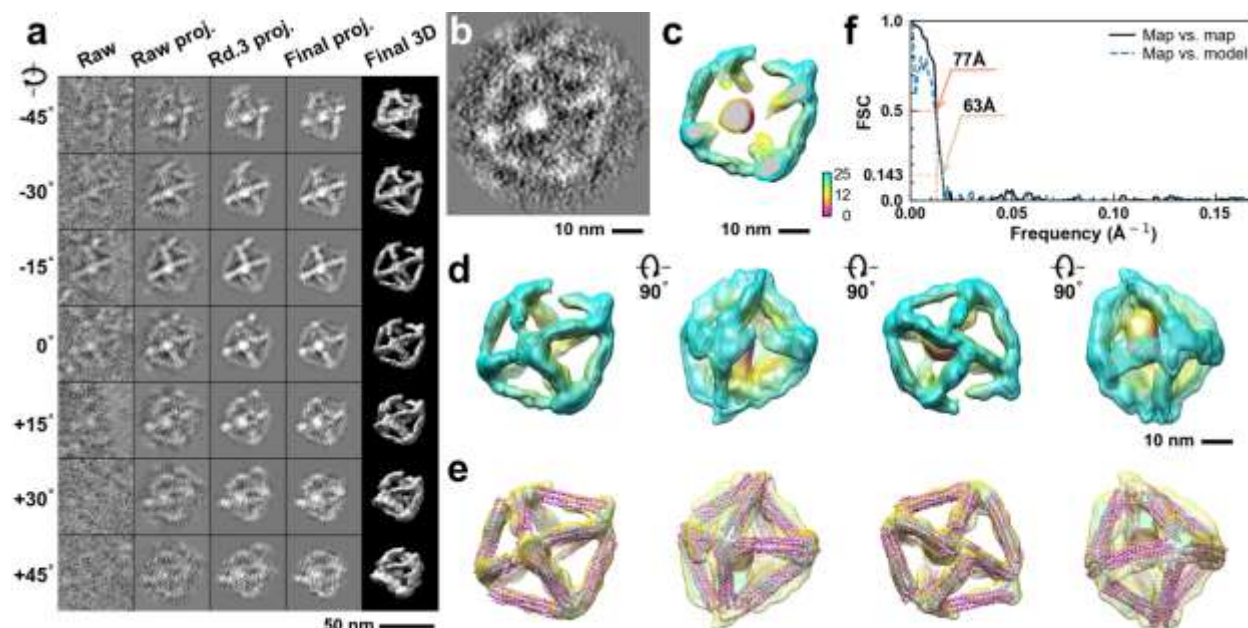

**Supplementary Fig. 216: IPET 3D reconstruction and model fitting of an individual unit-cell particle (Index: 208) within a 2D lattice with 70% ferritin loading.** **a**, Seven representative tilt images of a single unit-cell particle are shown in the first column (from left). The tilt images are aligned to a common center using IPET through iterative refinement. The projections of the raw, intermediate, and final 3D reconstruction at the corresponding angles are displayed in the subsequent four columns. **b**, A central cross-section (~23 nm thick) of the final reconstruction before masking is applied. **c**, 3D views of the central cross-section. **d**, Final 3D density map of this particle, viewed from four perpendicular directions. **e**, Final 3D reconstruction superimposed with the fitted model, viewed from four perpendicular directions. **f**, FSC analyses of the final map resolution using two methods: map-map FSC, where each map is reconstructed from one half of the images (even vs. odd tilt angle indices), and map-model FSC, where the model map is generated from the fitted model. Resolution assessments are provided based on tilt-based map-map and map-model FSC analyses at thresholds of FSC=0.5 and 0.143, respectively.

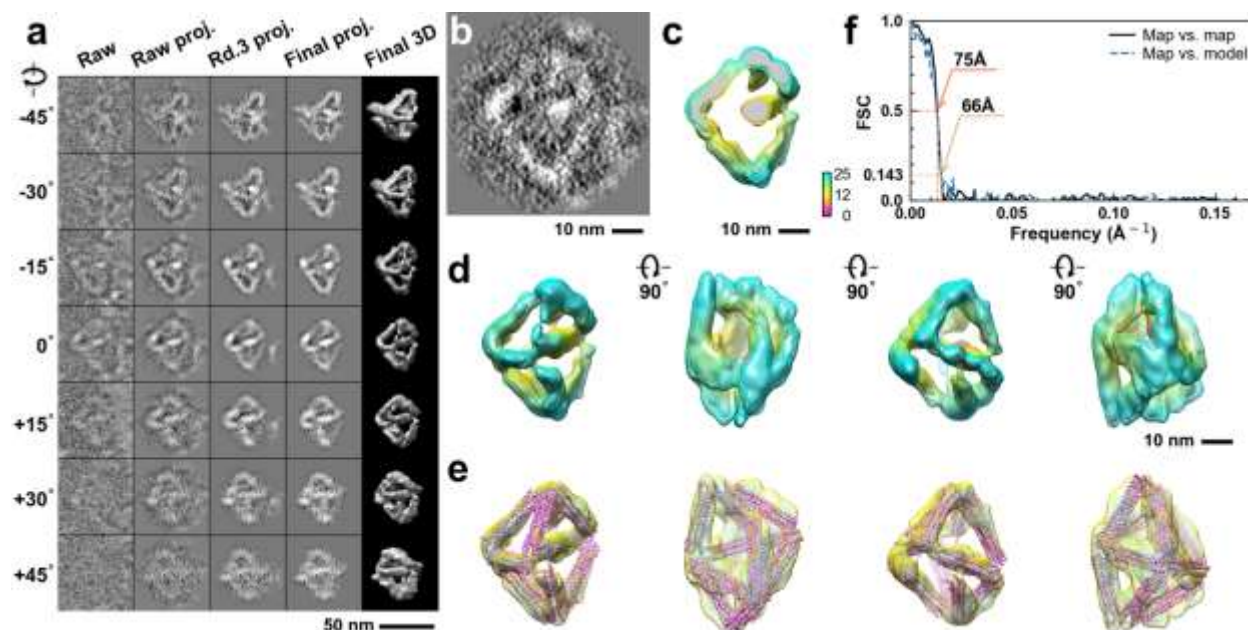

**Supplementary Fig. 217: IPET 3D reconstruction and model fitting of an individual unit-cell particle (Index: 209) within a 2D lattice with 70% ferritin loading.** **a**, Seven representative tilt images of a single unit-cell particle are shown in the first column (from left). The tilt images are aligned to a common center using IPET through iterative refinement. The projections of the raw, intermediate, and final 3D reconstruction at the corresponding angles are displayed in the subsequent four columns. **b**, A central cross-section (~23 nm thick) of the final reconstruction before masking is applied. **c**, 3D views of the central cross-section. **d**, Final 3D density map of this particle, viewed from four perpendicular directions. **e**, Final 3D reconstruction superimposed with the fitted model, viewed from four perpendicular directions. **f**, FSC analyses of the final map resolution using two methods: map-map FSC, where each map is reconstructed from one half of the images (even vs. odd tilt angle indices), and map-model FSC, where the model map is generated from the fitted model. Resolution assessments are provided based on tilt-based map-map and map-model FSC analyses at thresholds of FSC=0.5 and 0.143, respectively.



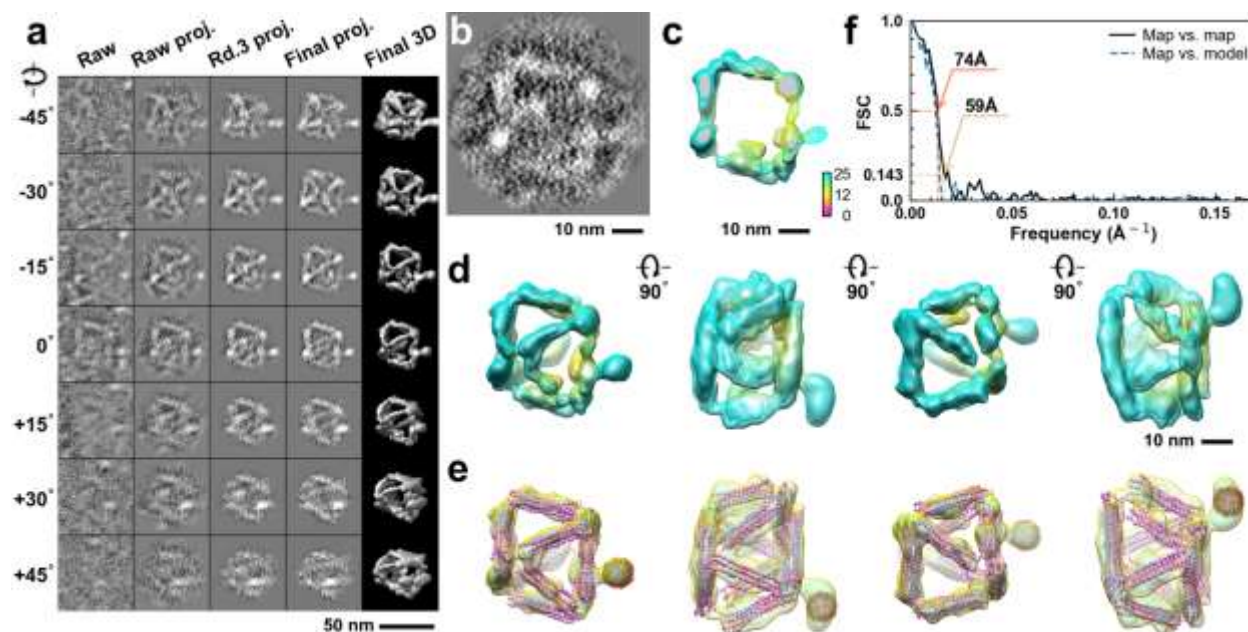

**Supplementary Fig. 218: IPET 3D reconstruction and model fitting of an individual unit-cell particle (Index: 210) within a 2D lattice with 70% ferritin loading.** **a**, Seven representative tilt images of a single unit-cell particle are shown in the first column (from left). The tilt images are aligned to a common center using IPET through iterative refinement. The projections of the raw, intermediate, and final 3D reconstruction at the corresponding angles are displayed in the subsequent four columns. **b**, A central cross-section (~23 nm thick) of the final reconstruction before masking is applied. **c**, 3D views of the central cross-section. **d**, Final 3D density map of this particle, viewed from four perpendicular directions. **e**, Final 3D reconstruction superimposed with the fitted model, viewed from four perpendicular directions. **f**, FSC analyses of the final map resolution using two methods: map-map FSC, where each map is reconstructed from one half of the images (even vs. odd tilt angle indices), and map-model FSC, where the model map is generated from the fitted model. Resolution assessments are provided based on tilt-based map-map and map-model FSC analyses at thresholds of FSC=0.5 and 0.143, respectively.

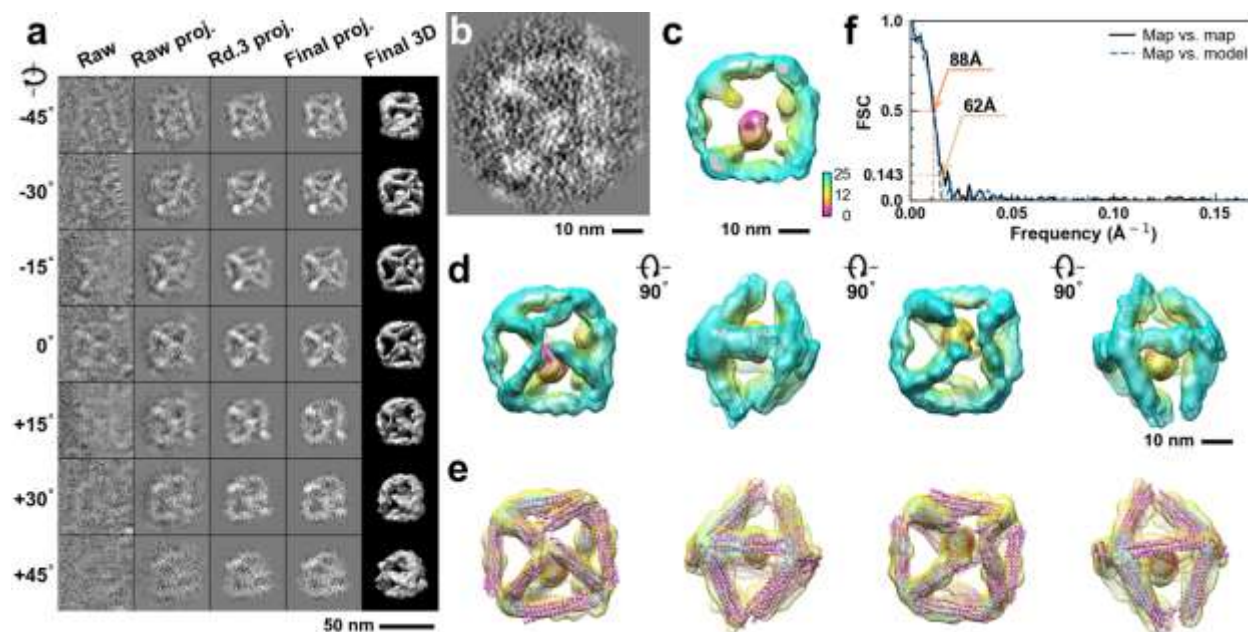

**Supplementary Fig. 219: IPET 3D reconstruction and model fitting of an individual unit-cell particle (Index: 211) within a 2D lattice with 70% ferritin loading.** **a**, Seven representative tilt images of a single unit-cell particle are shown in the first column (from left). The tilt images are aligned to a common center using IPET through iterative refinement. The projections of the raw, intermediate, and final 3D reconstruction at the corresponding angles are displayed in the subsequent four columns. **b**, A central cross-section (~23 nm thick) of the final reconstruction before masking is applied. **c**, 3D views of the central cross-section. **d**, Final 3D density map of this particle, viewed from four perpendicular directions. **e**, Final 3D reconstruction superimposed with the fitted model, viewed from four perpendicular directions. **f**, FSC analyses of the final map resolution using two methods: map-map FSC, where each map is reconstructed from one half of the images (even vs. odd tilt angle indices), and map-model FSC, where the model map is generated from the fitted model. Resolution assessments are provided based on tilt-based map-map and map-model FSC analyses at thresholds of FSC=0.5 and 0.143, respectively.

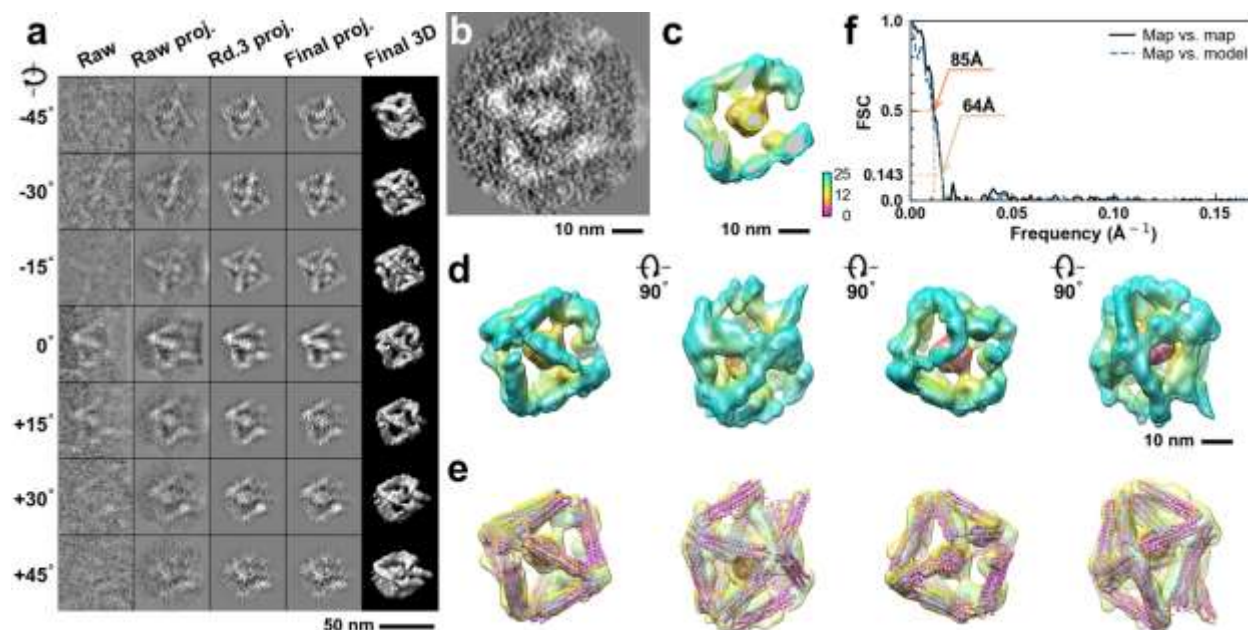

**Supplementary Fig. 220: IPET 3D reconstruction and model fitting of an individual unit-cell particle (Index: 212) within a 2D lattice with 70% ferritin loading.** **a**, Seven representative tilt images of a single unit-cell particle are shown in the first column (from left). The tilt images are aligned to a common center using IPET through iterative refinement. The projections of the raw, intermediate, and final 3D reconstruction at the corresponding angles are displayed in the subsequent four columns. **b**, A central cross-section (~23 nm thick) of the final reconstruction before masking is applied. **c**, 3D views of the central cross-section. **d**, Final 3D density map of this particle, viewed from four perpendicular directions. **e**, Final 3D reconstruction superimposed with the fitted model, viewed from four perpendicular directions. **f**, FSC analyses of the final map resolution using two methods: map-map FSC, where each map is reconstructed from one half of the images (even vs. odd tilt angle indices), and map-model FSC, where the model map is generated from the fitted model. Resolution assessments are provided based on tilt-based map-map and map-model FSC analyses at thresholds of FSC=0.5 and 0.143, respectively.

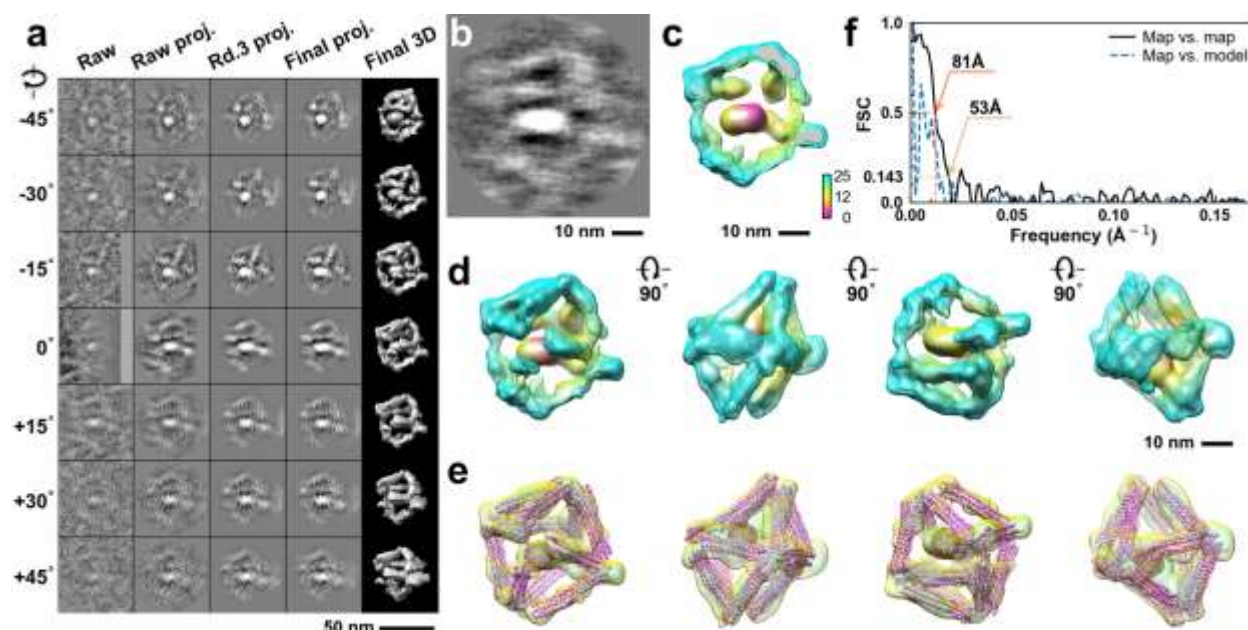

**Supplementary Fig. 221: IPET 3D reconstruction and model fitting of an individual unit-cell particle (Index: 213) within a 2D lattice with 70% ferritin loading.** **a**, Seven representative tilt images of a single unit-cell particle are shown in the first column (from left). The tilt images are aligned to a common center using IPET through iterative refinement. The projections of the raw, intermediate, and final 3D reconstruction at the corresponding angles are displayed in the subsequent four columns. **b**, A central cross-section (~23 nm thick) of the final reconstruction before masking is applied. **c**, 3D views of the central cross-section. **d**, Final 3D density map of this particle, viewed from four perpendicular directions. **e**, Final 3D reconstruction superimposed with the fitted model, viewed from four perpendicular directions. **f**, FSC analyses of the final map resolution using two methods: map-map FSC, where each map is reconstructed from one half of the images (even vs. odd tilt angle indices), and map-model FSC, where the model map is generated from the fitted model. Resolution assessments are provided based on tilt-based map-map and map-model FSC analyses at thresholds of FSC=0.5 and 0.143, respectively.



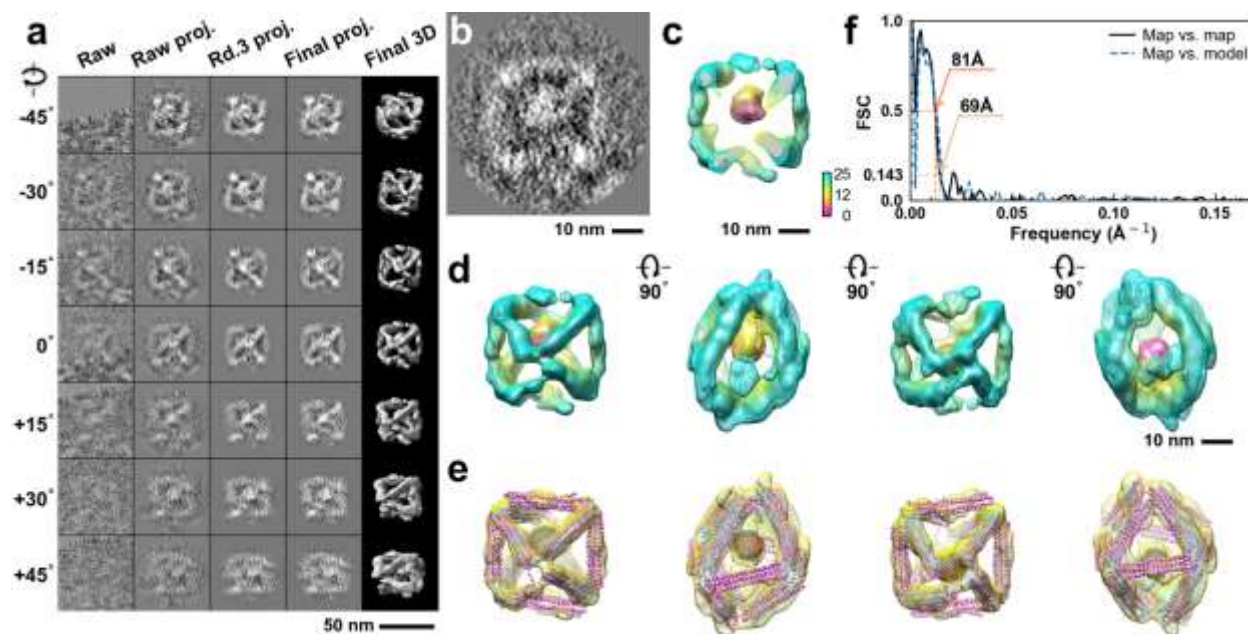

**Supplementary Fig. 222: IPET 3D reconstruction and model fitting of an individual unit-cell particle (Index: 214) within a 2D lattice with 70% ferritin loading.** **a**, Seven representative tilt images of a single unit-cell particle are shown in the first column (from left). The tilt images are aligned to a common center using IPET through iterative refinement. The projections of the raw, intermediate, and final 3D reconstruction at the corresponding angles are displayed in the subsequent four columns. **b**, A central cross-section (~23 nm thick) of the final reconstruction before masking is applied. **c**, 3D views of the central cross-section. **d**, Final 3D density map of this particle, viewed from four perpendicular directions. **e**, Final 3D reconstruction superimposed with the fitted model, viewed from four perpendicular directions. **f**, FSC analyses of the final map resolution using two methods: map-map FSC, where each map is reconstructed from one half of the images (even vs. odd tilt angle indices), and map-model FSC, where the model map is generated from the fitted model. Resolution assessments are provided based on tilt-based map-map and map-model FSC analyses at thresholds of FSC=0.5 and 0.143, respectively.

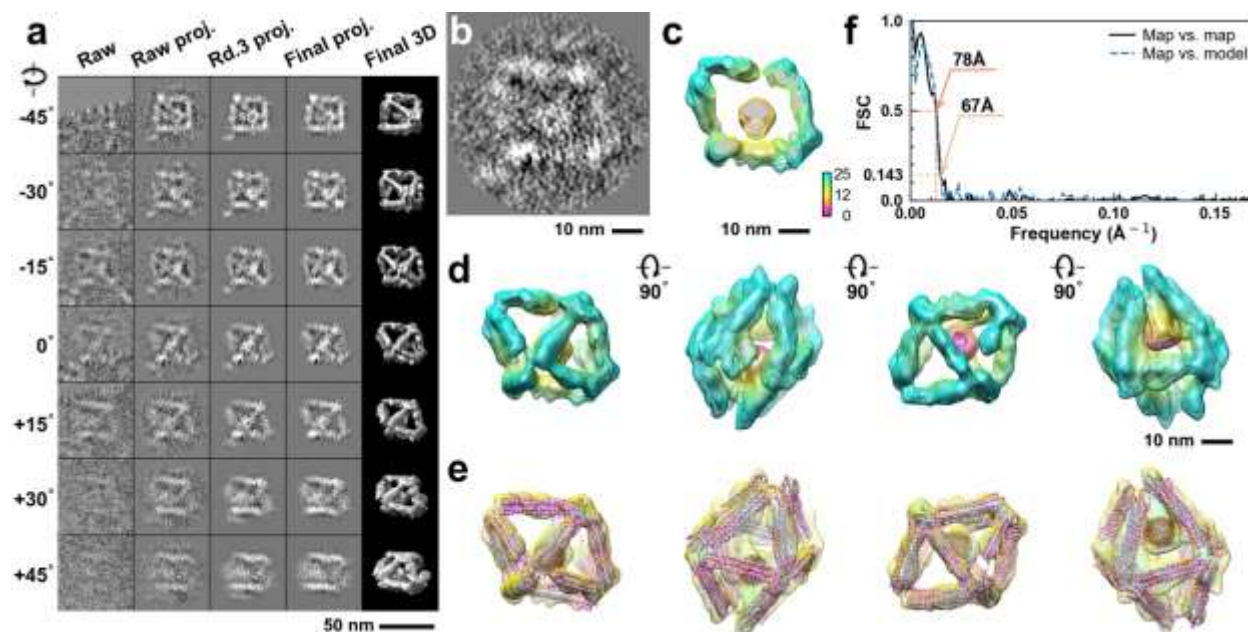

**Supplementary Fig. 223: IPET 3D reconstruction and model fitting of an individual unit-cell particle (Index: 215) within a 2D lattice with 70% ferritin loading.** **a**, Seven representative tilt images of a single unit-cell particle are shown in the first column (from left). The tilt images are aligned to a common center using IPET through iterative refinement. The projections of the raw, intermediate, and final 3D reconstruction at the corresponding angles are displayed in the subsequent four columns. **b**, A central cross-section (~23 nm thick) of the final reconstruction before masking is applied. **c**, 3D views of the central cross-section. **d**, Final 3D density map of this particle, viewed from four perpendicular directions. **e**, Final 3D reconstruction superimposed with the fitted model, viewed from four perpendicular directions. **f**, FSC analyses of the final map resolution using two methods: map-map FSC, where each map is reconstructed from one half of the images (even vs. odd tilt angle indices), and map-model FSC, where the model map is generated from the fitted model. Resolution assessments are provided based on tilt-based map-map and map-model FSC analyses at thresholds of FSC=0.5 and 0.143, respectively.

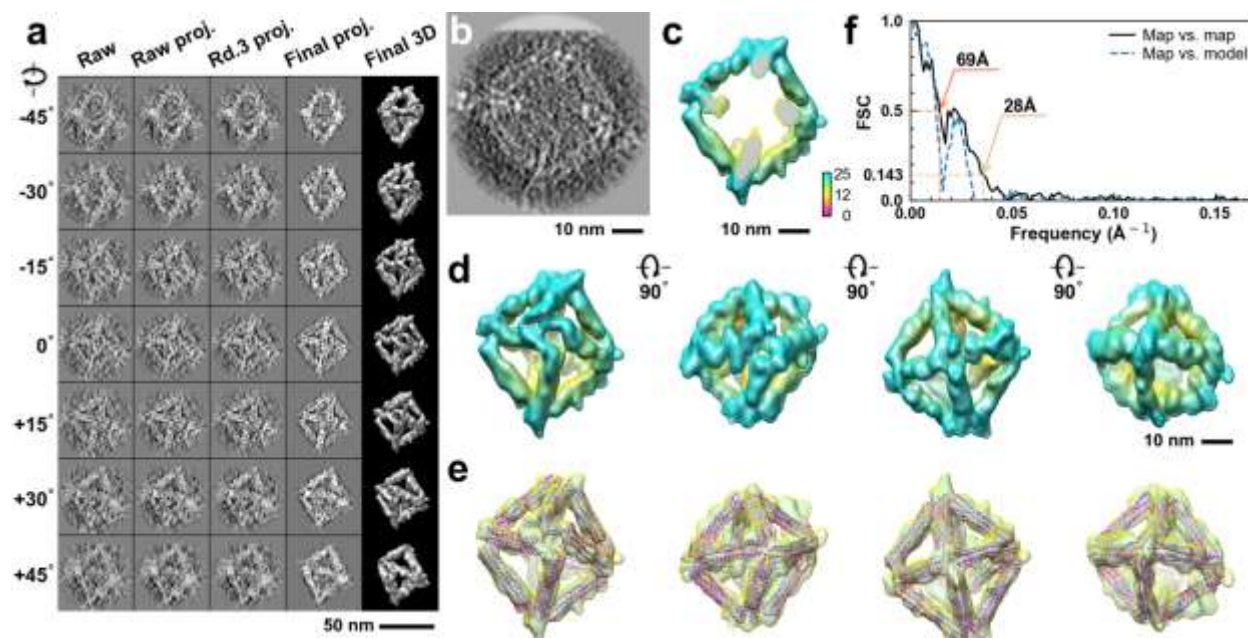

**Supplementary Fig. 224: IPET 3D reconstruction and model fitting of an individual unit-cell particle (Index: 216) within a 2D lattice with 0% ferritin loading.** **a**, Seven representative tilt images of a single unit-cell particle are shown in the first column (from left). The tilt images are aligned to a common center using IPET through iterative refinement. The projections of the raw, intermediate, and final 3D reconstruction at the corresponding angles are displayed in the subsequent four columns. **b**, A central cross-section (~23 nm thick) of the final reconstruction before masking is applied. **c**, 3D views of the central cross-section. **d**, Final 3D density map of this particle, viewed from four perpendicular directions. **e**, Final 3D reconstruction superimposed with the fitted model, viewed from four perpendicular directions. **f**, FSC analyses of the final map resolution using two methods: map-map FSC, where each map is reconstructed from one half of the images (even vs. odd tilt angle indices), and map-model FSC, where the model map is generated from the fitted model. Resolution assessments are provided based on tilt-based map-map and map-model FSC analyses at thresholds of FSC=0.5 and 0.143, respectively.

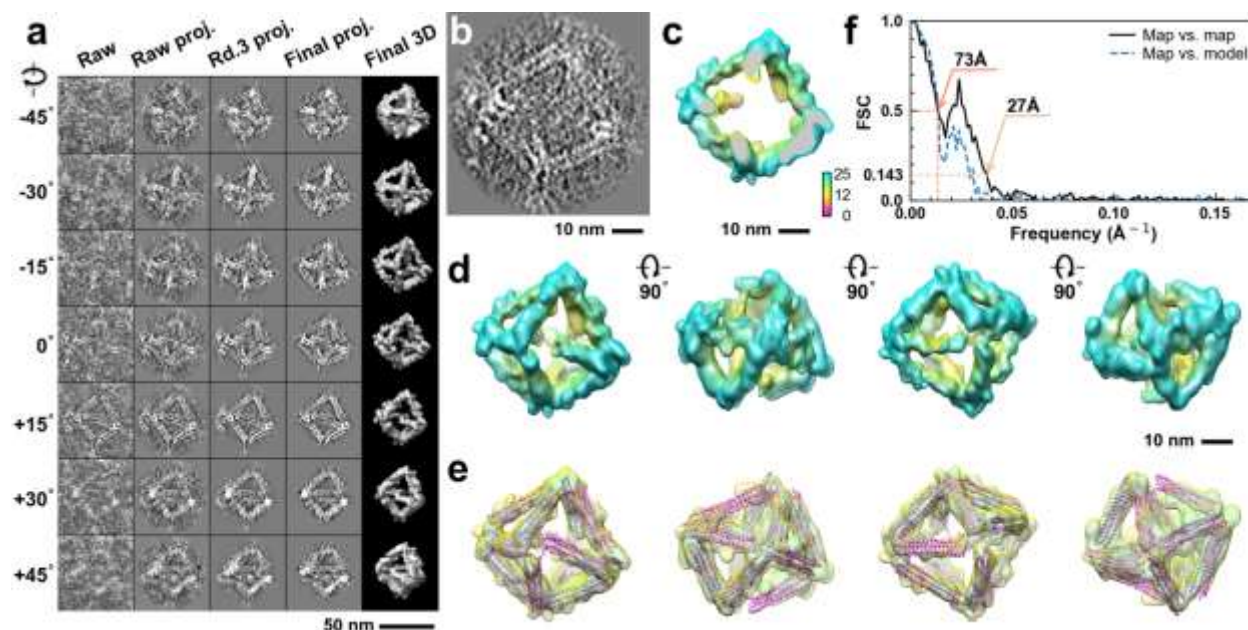

**Supplementary Fig. 225: IPET 3D reconstruction and model fitting of an individual unit-cell particle (Index: 217) within a 2D lattice with 0% ferritin loading.** **a**, Seven representative tilt images of a single unit-cell particle are shown in the first column (from left). The tilt images are aligned to a common center using IPET through iterative refinement. The projections of the raw, intermediate, and final 3D reconstruction at the corresponding angles are displayed in the subsequent four columns. **b**, A central cross-section (~23 nm thick) of the final reconstruction before masking is applied. **c**, 3D views of the central cross-section. **d**, Final 3D density map of this particle, viewed from four perpendicular directions. **e**, Final 3D reconstruction superimposed with the fitted model, viewed from four perpendicular directions. **f**, FSC analyses of the final map resolution using two methods: map-map FSC, where each map is reconstructed from one half of the images (even vs. odd tilt angle indices), and map-model FSC, where the model map is generated from the fitted model. Resolution assessments are provided based on tilt-based map-map and map-model FSC analyses at thresholds of FSC=0.5 and 0.143, respectively.



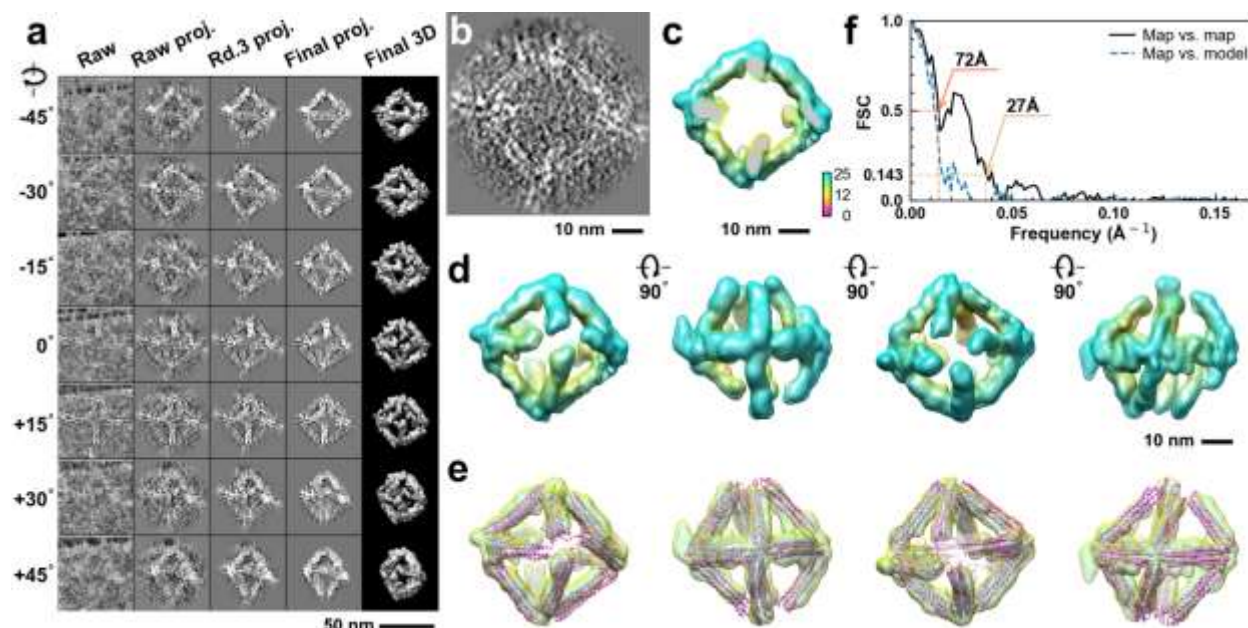

**Supplementary Fig. 226: IPET 3D reconstruction and model fitting of an individual unit-cell particle (Index: 218) within a 2D lattice with 0% ferritin loading.** **a**, Seven representative tilt images of a single unit-cell particle are shown in the first column (from left). The tilt images are aligned to a common center using IPET through iterative refinement. The projections of the raw, intermediate, and final 3D reconstruction at the corresponding angles are displayed in the subsequent four columns. **b**, A central cross-section (~23 nm thick) of the final reconstruction before masking is applied. **c**, 3D views of the central cross-section. **d**, Final 3D density map of this particle, viewed from four perpendicular directions. **e**, Final 3D reconstruction superimposed with the fitted model, viewed from four perpendicular directions. **f**, FSC analyses of the final map resolution using two methods: map-map FSC, where each map is reconstructed from one half of the images (even vs. odd tilt angle indices), and map-model FSC, where the model map is generated from the fitted model. Resolution assessments are provided based on tilt-based map-map and map-model FSC analyses at thresholds of FSC=0.5 and 0.143, respectively.

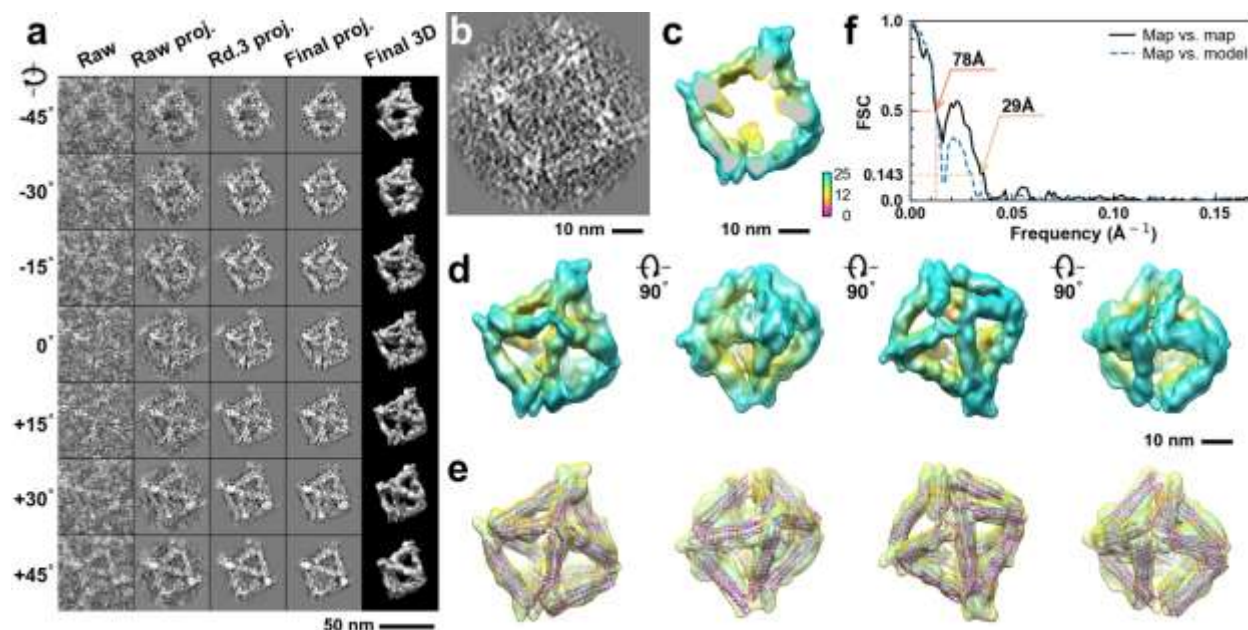

**Supplementary Fig. 227: IPET 3D reconstruction and model fitting of an individual unit-cell particle (Index: 219) within a 2D lattice with 0% ferritin loading.** **a**, Seven representative tilt images of a single unit-cell particle are shown in the first column (from left). The tilt images are aligned to a common center using IPET through iterative refinement. The projections of the raw, intermediate, and final 3D reconstruction at the corresponding angles are displayed in the subsequent four columns. **b**, A central cross-section (~23 nm thick) of the final reconstruction before masking is applied. **c**, 3D views of the central cross-section. **d**, Final 3D density map of this particle, viewed from four perpendicular directions. **e**, Final 3D reconstruction superimposed with the fitted model, viewed from four perpendicular directions. **f**, FSC analyses of the final map resolution using two methods: map-map FSC, where each map is reconstructed from one half of the images (even vs. odd tilt angle indices), and map-model FSC, where the model map is generated from the fitted model. Resolution assessments are provided based on tilt-based map-map and map-model FSC analyses at thresholds of FSC=0.5 and 0.143, respectively.

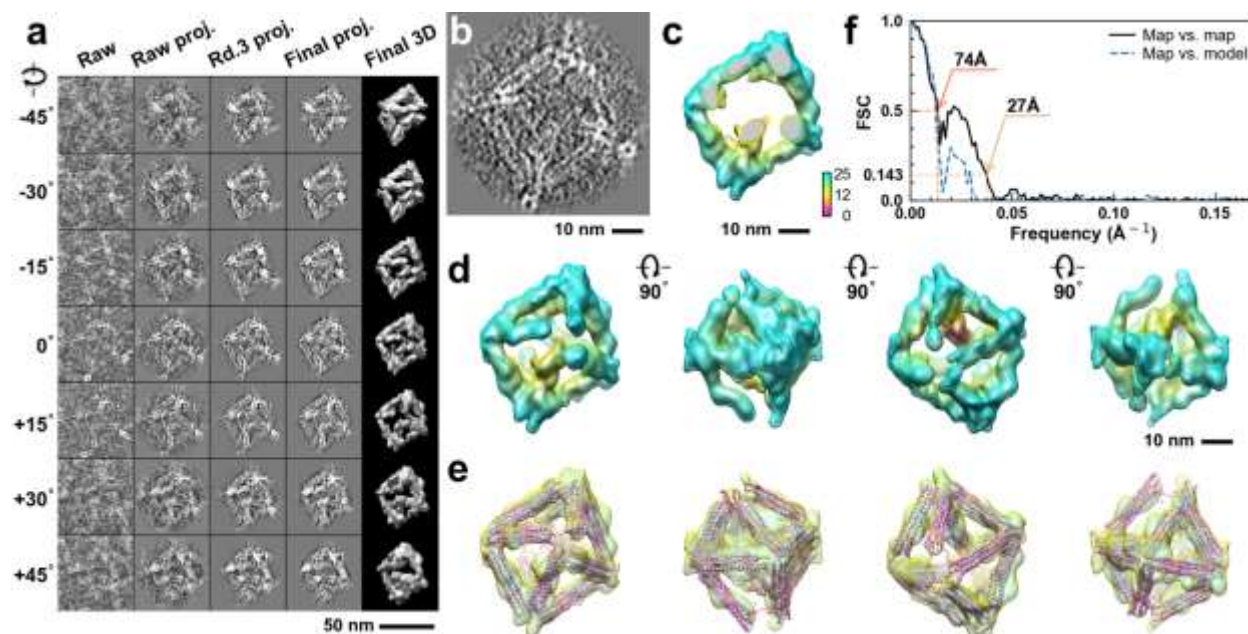

**Supplementary Fig. 228: IPET 3D reconstruction and model fitting of an individual unit-cell particle (Index: 220) within a 2D lattice with 0% ferritin loading.** **a**, Seven representative tilt images of a single unit-cell particle are shown in the first column (from left). The tilt images are aligned to a common center using IPET through iterative refinement. The projections of the raw, intermediate, and final 3D reconstruction at the corresponding angles are displayed in the subsequent four columns. **b**, A central cross-section (~23 nm thick) of the final reconstruction before masking is applied. **c**, 3D views of the central cross-section. **d**, Final 3D density map of this particle, viewed from four perpendicular directions. **e**, Final 3D reconstruction superimposed with the fitted model, viewed from four perpendicular directions. **f**, FSC analyses of the final map resolution using two methods: map-map FSC, where each map is reconstructed from one half of the images (even vs. odd tilt angle indices), and map-model FSC, where the model map is generated from the fitted model. Resolution assessments are provided based on tilt-based map-map and map-model FSC analyses at thresholds of FSC=0.5 and 0.143, respectively.

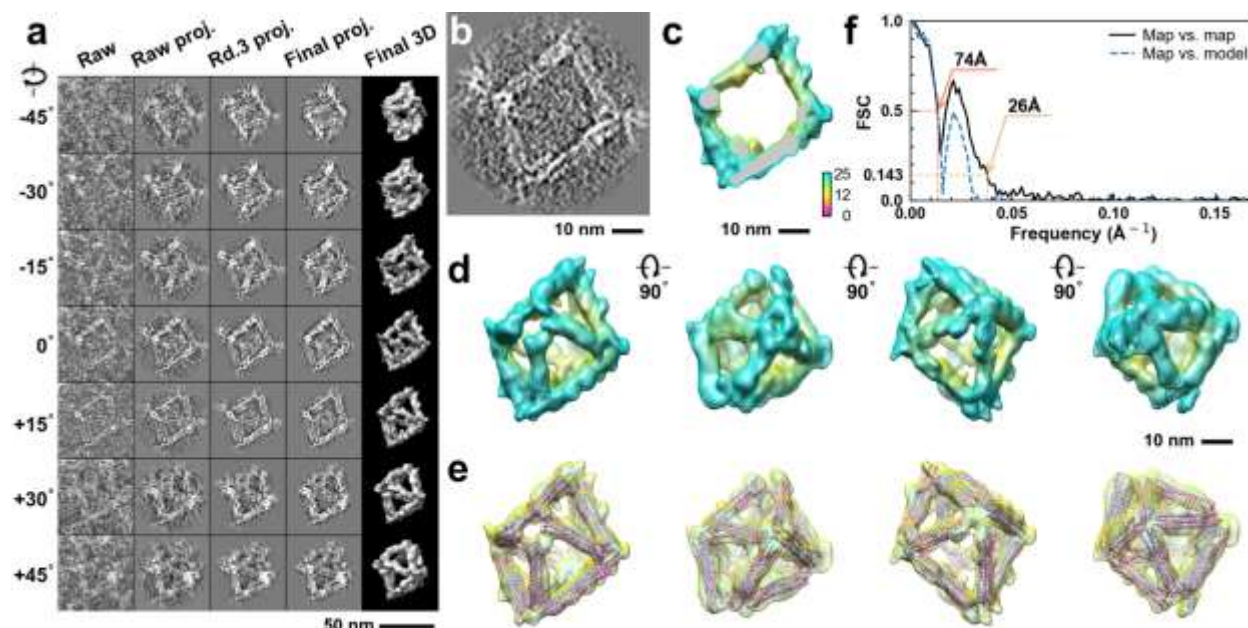

**Supplementary Fig. 229: IPET 3D reconstruction and model fitting of an individual unit-cell particle (Index: 221) within a 2D lattice with 0% ferritin loading.** **a**, Seven representative tilt images of a single unit-cell particle are shown in the first column (from left). The tilt images are aligned to a common center using IPET through iterative refinement. The projections of the raw, intermediate, and final 3D reconstruction at the corresponding angles are displayed in the subsequent four columns. **b**, A central cross-section (~23 nm thick) of the final reconstruction before masking is applied. **c**, 3D views of the central cross-section. **d**, Final 3D density map of this particle, viewed from four perpendicular directions. **e**, Final 3D reconstruction superimposed with the fitted model, viewed from four perpendicular directions. **f**, FSC analyses of the final map resolution using two methods: map-map FSC, where each map is reconstructed from one half of the images (even vs. odd tilt angle indices), and map-model FSC, where the model map is generated from the fitted model. Resolution assessments are provided based on tilt-based map-map and map-model FSC analyses at thresholds of FSC=0.5 and 0.143, respectively.



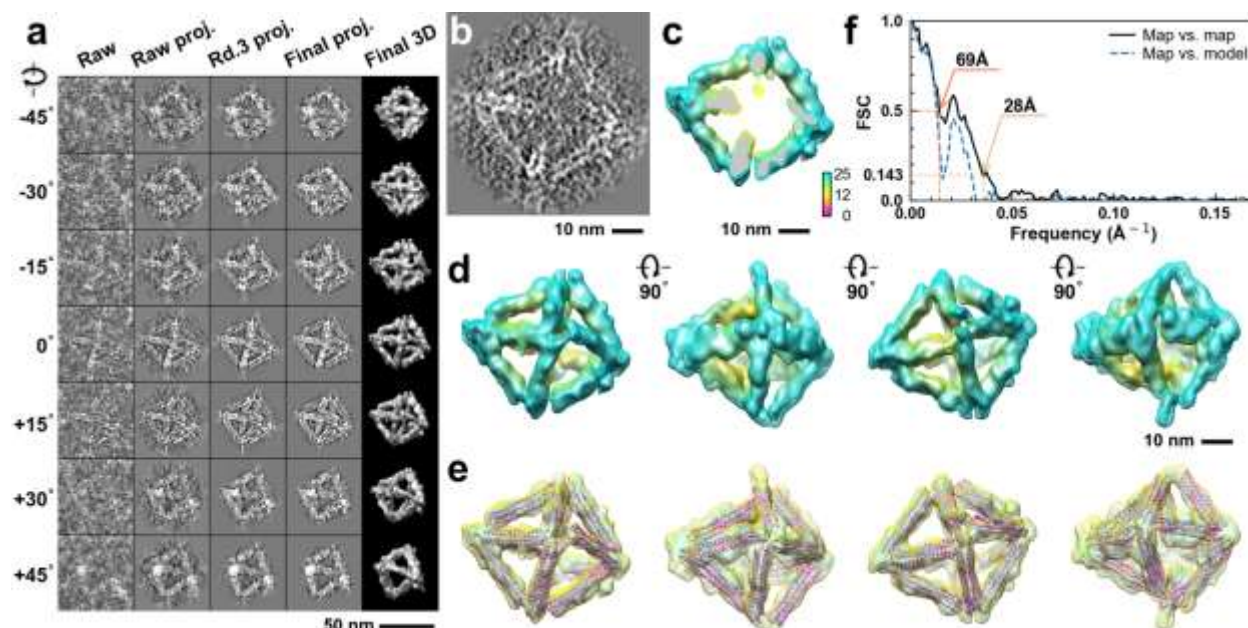

**Supplementary Fig. 230: IPET 3D reconstruction and model fitting of an individual unit-cell particle (Index: 222) within a 2D lattice with 0% ferritin loading.** **a**, Seven representative tilt images of a single unit-cell particle are shown in the first column (from left). The tilt images are aligned to a common center using IPET through iterative refinement. The projections of the raw, intermediate, and final 3D reconstruction at the corresponding angles are displayed in the subsequent four columns. **b**, A central cross-section (~23 nm thick) of the final reconstruction before masking is applied. **c**, 3D views of the central cross-section. **d**, Final 3D density map of this particle, viewed from four perpendicular directions. **e**, Final 3D reconstruction superimposed with the fitted model, viewed from four perpendicular directions. **f**, FSC analyses of the final map resolution using two methods: map-map FSC, where each map is reconstructed from one half of the images (even vs. odd tilt angle indices), and map-model FSC, where the model map is generated from the fitted model. Resolution assessments are provided based on tilt-based map-map and map-model FSC analyses at thresholds of FSC=0.5 and 0.143, respectively.

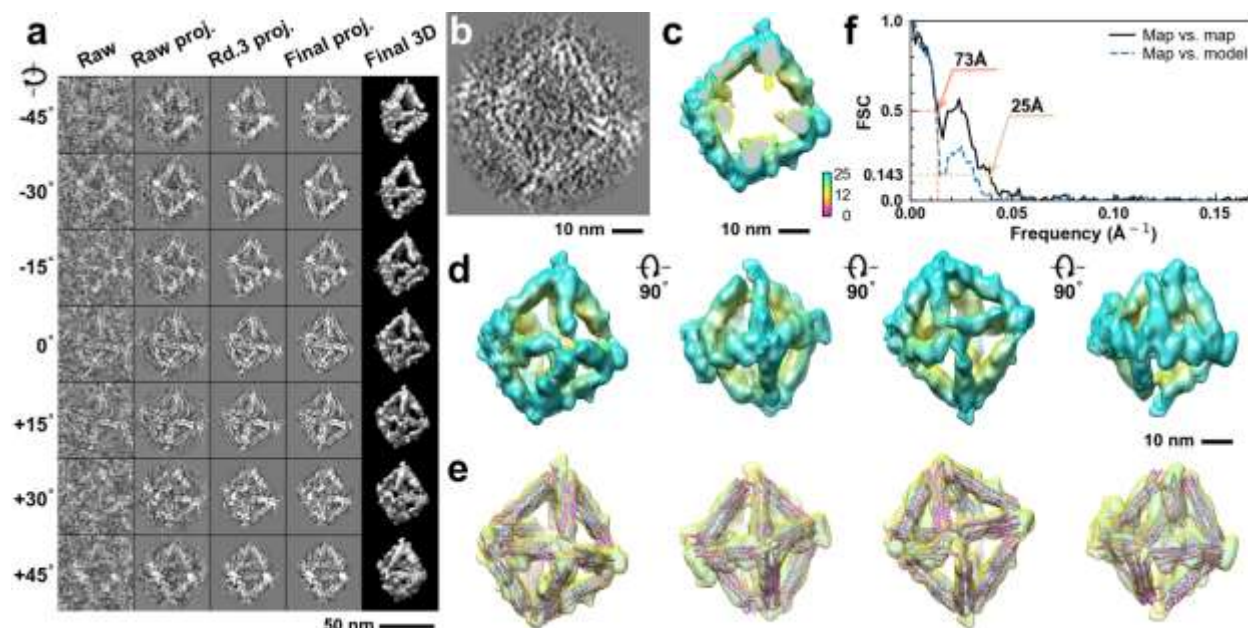

**Supplementary Fig. 231: IPET 3D reconstruction and model fitting of an individual unit-cell particle (Index: 223) within a 2D lattice with 0% ferritin loading.** **a**, Seven representative tilt images of a single unit-cell particle are shown in the first column (from left). The tilt images are aligned to a common center using IPET through iterative refinement. The projections of the raw, intermediate, and final 3D reconstruction at the corresponding angles are displayed in the subsequent four columns. **b**, A central cross-section (~23 nm thick) of the final reconstruction before masking is applied. **c**, 3D views of the central cross-section. **d**, Final 3D density map of this particle, viewed from four perpendicular directions. **e**, Final 3D reconstruction superimposed with the fitted model, viewed from four perpendicular directions. **f**, FSC analyses of the final map resolution using two methods: map-map FSC, where each map is reconstructed from one half of the images (even vs. odd tilt angle indices), and map-model FSC, where the model map is generated from the fitted model. Resolution assessments are provided based on tilt-based map-map and map-model FSC analyses at thresholds of FSC=0.5 and 0.143, respectively.

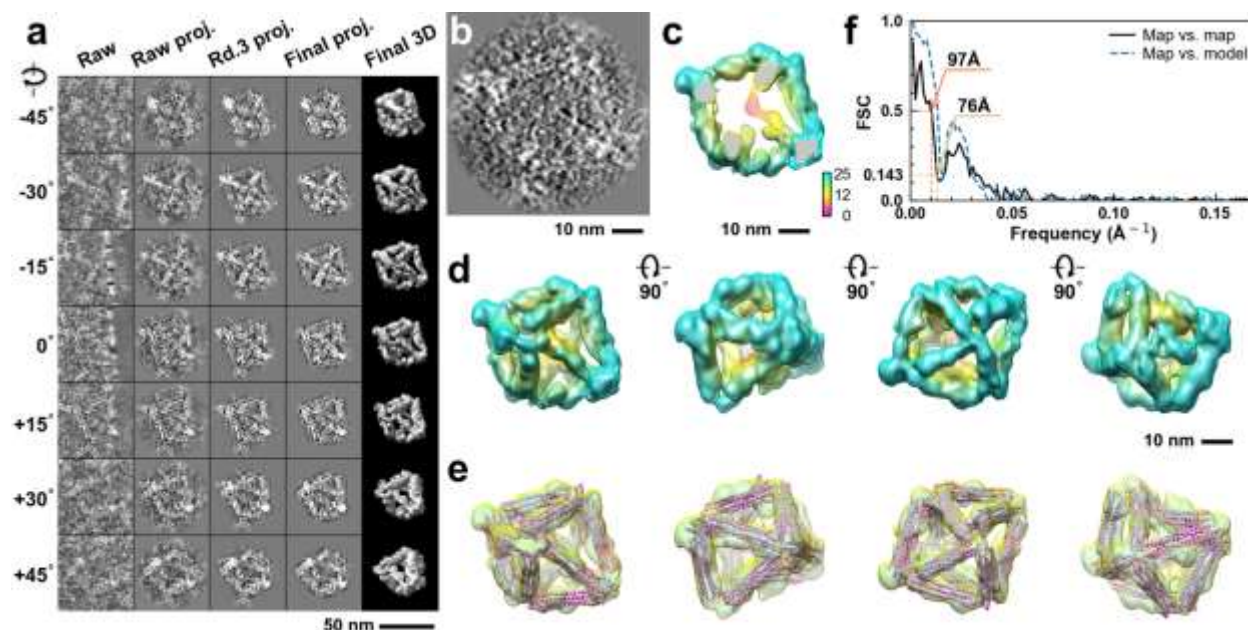

**Supplementary Fig. 232: IPET 3D reconstruction and model fitting of an individual unit-cell particle (Index: 224) within a 2D lattice with 0% ferritin loading.** **a**, Seven representative tilt images of a single unit-cell particle are shown in the first column (from left). The tilt images are aligned to a common center using IPET through iterative refinement. The projections of the raw, intermediate, and final 3D reconstruction at the corresponding angles are displayed in the subsequent four columns. **b**, A central cross-section (~23 nm thick) of the final reconstruction before masking is applied. **c**, 3D views of the central cross-section. **d**, Final 3D density map of this particle, viewed from four perpendicular directions. **e**, Final 3D reconstruction superimposed with the fitted model, viewed from four perpendicular directions. **f**, FSC analyses of the final map resolution using two methods: map-map FSC, where each map is reconstructed from one half of the images (even vs. odd tilt angle indices), and map-model FSC, where the model map is generated from the fitted model. Resolution assessments are provided based on tilt-based map-map and map-model FSC analyses at thresholds of FSC=0.5 and 0.143, respectively.

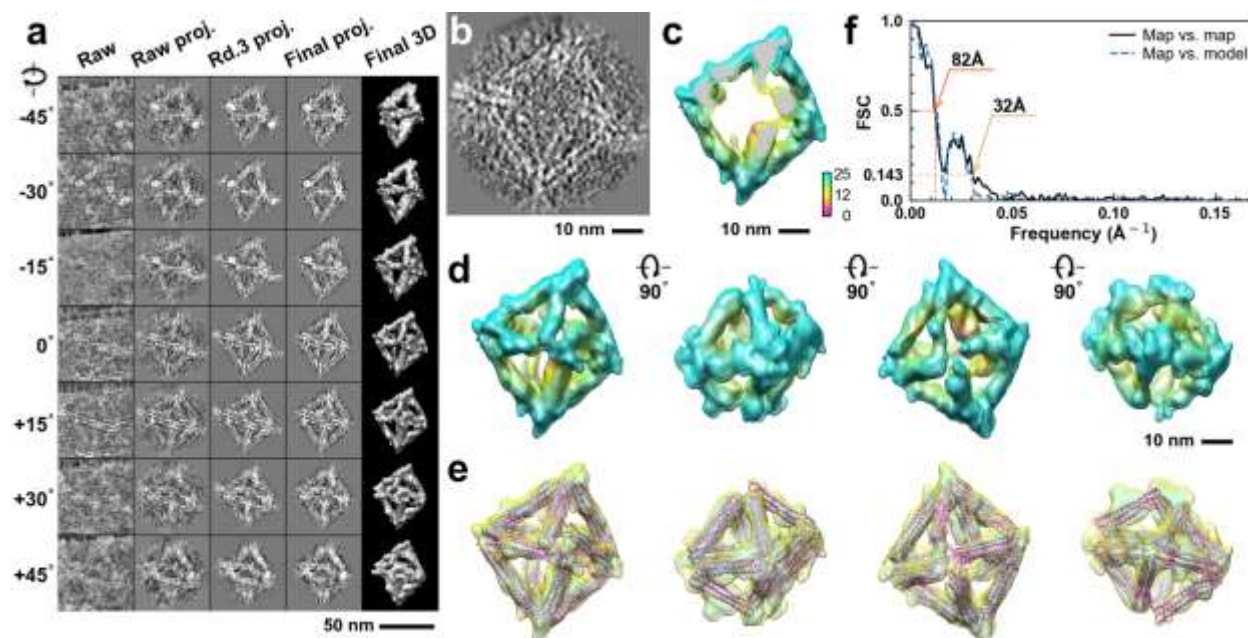

**Supplementary Fig. 233: IPET 3D reconstruction and model fitting of an individual unit-cell particle (Index: 225) within a 2D lattice with 0% ferritin loading.** **a**, Seven representative tilt images of a single unit-cell particle are shown in the first column (from left). The tilt images are aligned to a common center using IPET through iterative refinement. The projections of the raw, intermediate, and final 3D reconstruction at the corresponding angles are displayed in the subsequent four columns. **b**, A central cross-section (~23 nm thick) of the final reconstruction before masking is applied. **c**, 3D views of the central cross-section. **d**, Final 3D density map of this particle, viewed from four perpendicular directions. **e**, Final 3D reconstruction superimposed with the fitted model, viewed from four perpendicular directions. **f**, FSC analyses of the final map resolution using two methods: map-map FSC, where each map is reconstructed from one half of the images (even vs. odd tilt angle indices), and map-model FSC, where the model map is generated from the fitted model. Resolution assessments are provided based on tilt-based map-map and map-model FSC analyses at thresholds of FSC=0.5 and 0.143, respectively.



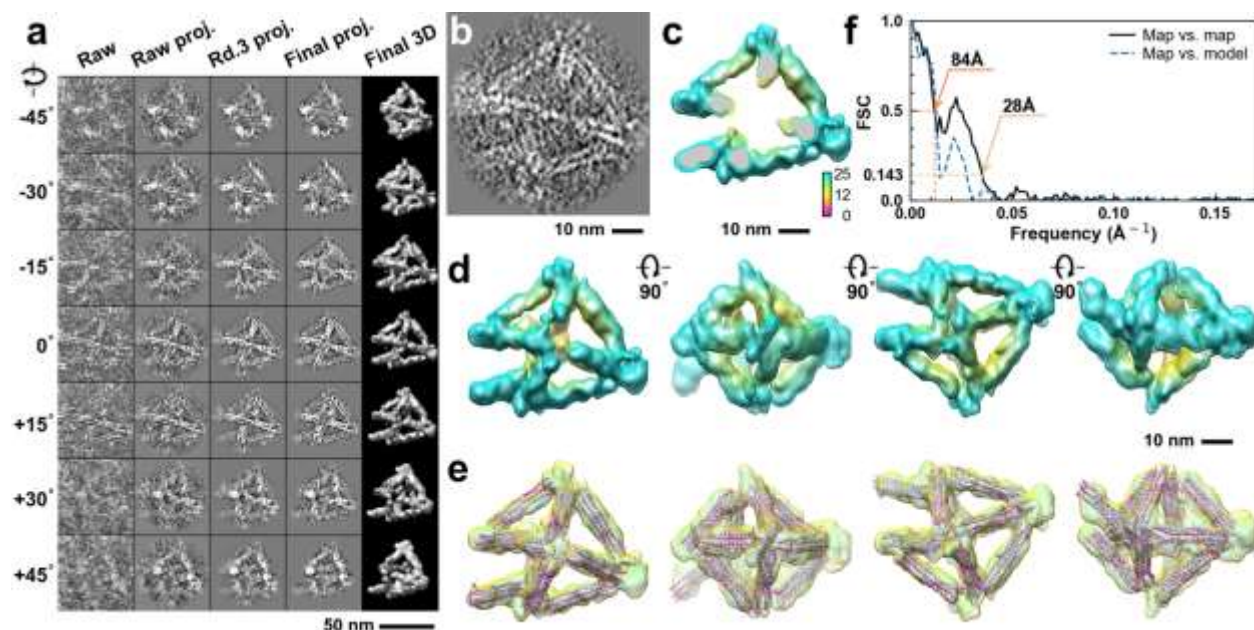

**Supplementary Fig. 234: IPET 3D reconstruction and model fitting of an individual unit-cell particle (Index: 226) within a 2D lattice with 0% ferritin loading.** **a**, Seven representative tilt images of a single unit-cell particle are shown in the first column (from left). The tilt images are aligned to a common center using IPET through iterative refinement. The projections of the raw, intermediate, and final 3D reconstruction at the corresponding angles are displayed in the subsequent four columns. **b**, A central cross-section (~23 nm thick) of the final reconstruction before masking is applied. **c**, 3D views of the central cross-section. **d**, Final 3D density map of this particle, viewed from four perpendicular directions. **e**, Final 3D reconstruction superimposed with the fitted model, viewed from four perpendicular directions. **f**, FSC analyses of the final map resolution using two methods: map-map FSC, where each map is reconstructed from one half of the images (even vs. odd tilt angle indices), and map-model FSC, where the model map is generated from the fitted model. Resolution assessments are provided based on tilt-based map-map and map-model FSC analyses at thresholds of FSC=0.5 and 0.143, respectively.

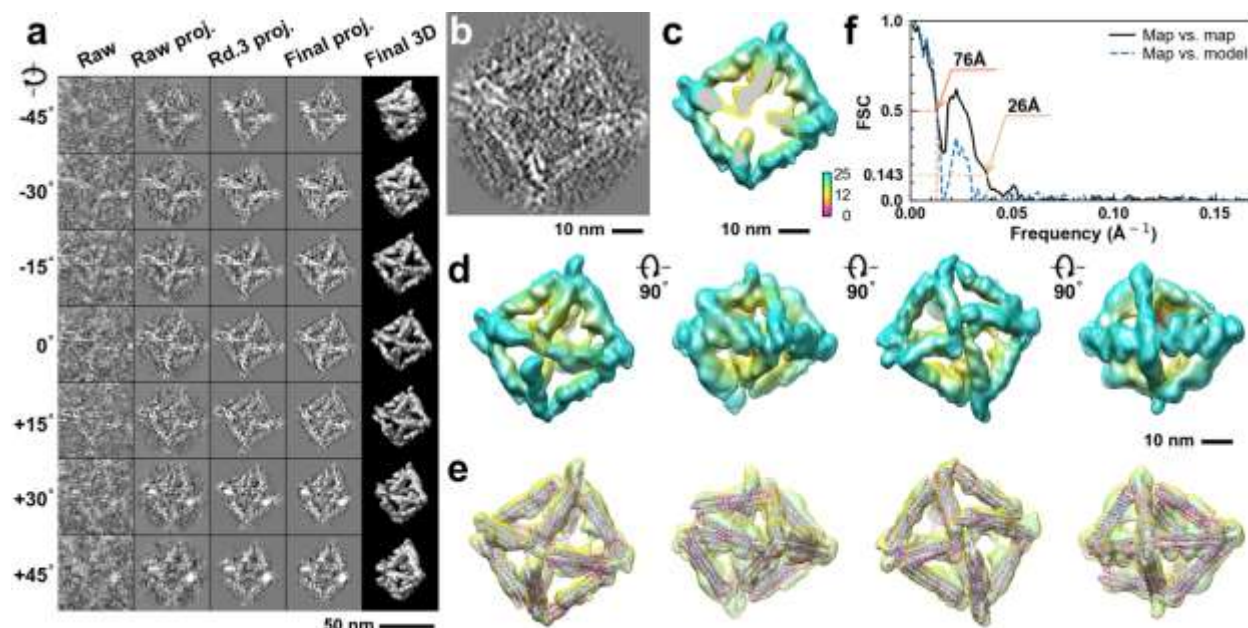

**Supplementary Fig. 235: IPET 3D reconstruction and model fitting of an individual unit-cell particle (Index: 227) within a 2D lattice with 0% ferritin loading.** **a**, Seven representative tilt images of a single unit-cell particle are shown in the first column (from left). The tilt images are aligned to a common center using IPET through iterative refinement. The projections of the raw, intermediate, and final 3D reconstruction at the corresponding angles are displayed in the subsequent four columns. **b**, A central cross-section (~23 nm thick) of the final reconstruction before masking is applied. **c**, 3D views of the central cross-section. **d**, Final 3D density map of this particle, viewed from four perpendicular directions. **e**, Final 3D reconstruction superimposed with the fitted model, viewed from four perpendicular directions. **f**, FSC analyses of the final map resolution using two methods: map-map FSC, where each map is reconstructed from one half of the images (even vs. odd tilt angle indices), and map-model FSC, where the model map is generated from the fitted model. Resolution assessments are provided based on tilt-based map-map and map-model FSC analyses at thresholds of FSC=0.5 and 0.143, respectively.

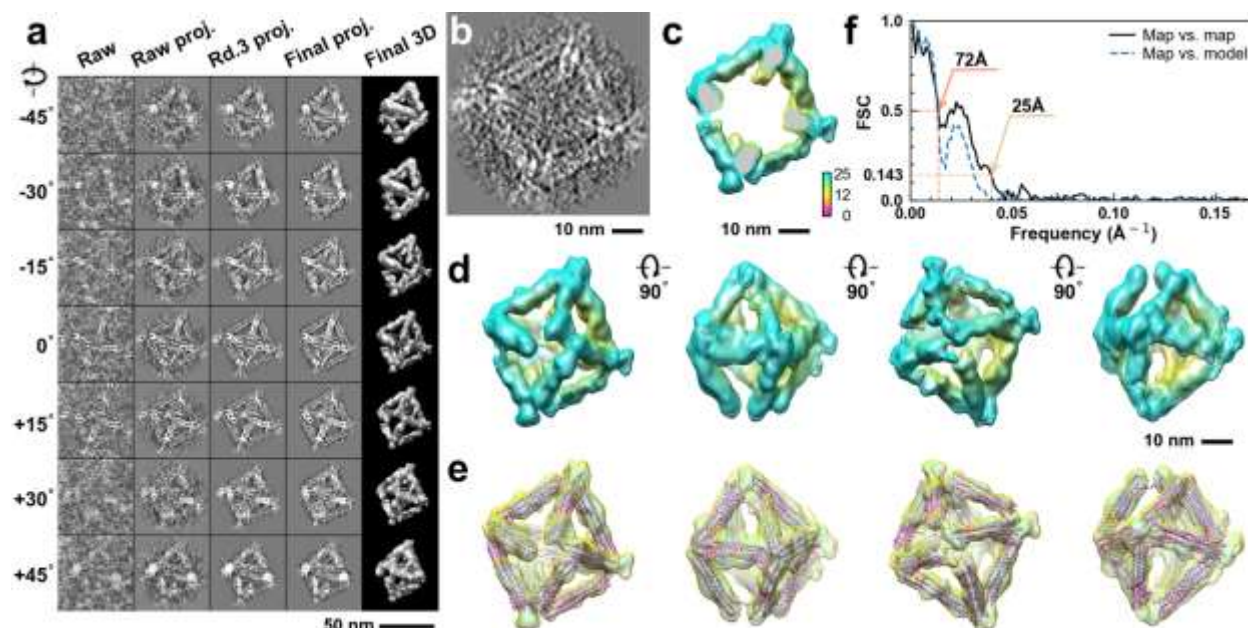

**Supplementary Fig. 236: IPET 3D reconstruction and model fitting of an individual unit-cell particle (Index: 228) within a 2D lattice with 0% ferritin loading.** **a**, Seven representative tilt images of a single unit-cell particle are shown in the first column (from left). The tilt images are aligned to a common center using IPET through iterative refinement. The projections of the raw, intermediate, and final 3D reconstruction at the corresponding angles are displayed in the subsequent four columns. **b**, A central cross-section (~23 nm thick) of the final reconstruction before masking is applied. **c**, 3D views of the central cross-section. **d**, Final 3D density map of this particle, viewed from four perpendicular directions. **e**, Final 3D reconstruction superimposed with the fitted model, viewed from four perpendicular directions. **f**, FSC analyses of the final map resolution using two methods: map-map FSC, where each map is reconstructed from one half of the images (even vs. odd tilt angle indices), and map-model FSC, where the model map is generated from the fitted model. Resolution assessments are provided based on tilt-based map-map and map-model FSC analyses at thresholds of FSC=0.5 and 0.143, respectively.

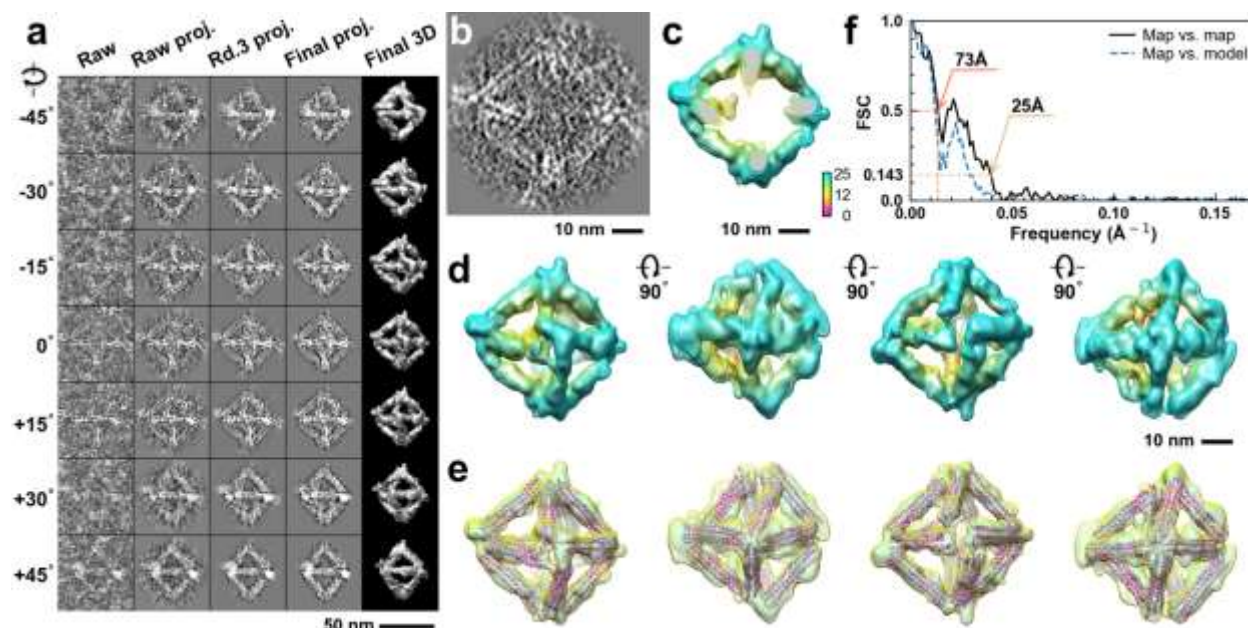

**Supplementary Fig. 237: IPET 3D reconstruction and model fitting of an individual unit-cell particle (Index: 229) within a 2D lattice with 0% ferritin loading.** **a**, Seven representative tilt images of a single unit-cell particle are shown in the first column (from left). The tilt images are aligned to a common center using IPET through iterative refinement. The projections of the raw, intermediate, and final 3D reconstruction at the corresponding angles are displayed in the subsequent four columns. **b**, A central cross-section (~23 nm thick) of the final reconstruction before masking is applied. **c**, 3D views of the central cross-section. **d**, Final 3D density map of this particle, viewed from four perpendicular directions. **e**, Final 3D reconstruction superimposed with the fitted model, viewed from four perpendicular directions. **f**, FSC analyses of the final map resolution using two methods: map-map FSC, where each map is reconstructed from one half of the images (even vs. odd tilt angle indices), and map-model FSC, where the model map is generated from the fitted model. Resolution assessments are provided based on tilt-based map-map and map-model FSC analyses at thresholds of FSC=0.5 and 0.143, respectively.



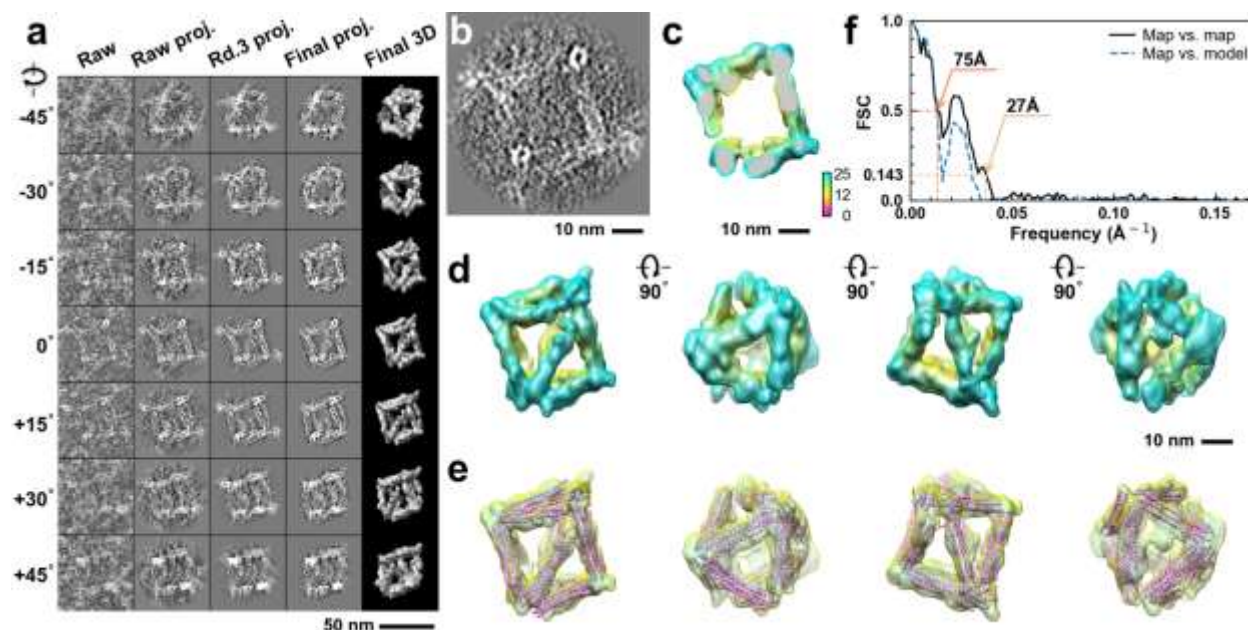

**Supplementary Fig. 238: IPET 3D reconstruction and model fitting of an individual unit-cell particle (Index: 230) within a 2D lattice with 0% ferritin loading.** **a**, Seven representative tilt images of a single unit-cell particle are shown in the first column (from left). The tilt images are aligned to a common center using IPET through iterative refinement. The projections of the raw, intermediate, and final 3D reconstruction at the corresponding angles are displayed in the subsequent four columns. **b**, A central cross-section (~23 nm thick) of the final reconstruction before masking is applied. **c**, 3D views of the central cross-section. **d**, Final 3D density map of this particle, viewed from four perpendicular directions. **e**, Final 3D reconstruction superimposed with the fitted model, viewed from four perpendicular directions. **f**, FSC analyses of the final map resolution using two methods: map-map FSC, where each map is reconstructed from one half of the images (even vs. odd tilt angle indices), and map-model FSC, where the model map is generated from the fitted model. Resolution assessments are provided based on tilt-based map-map and map-model FSC analyses at thresholds of FSC=0.5 and 0.143, respectively.

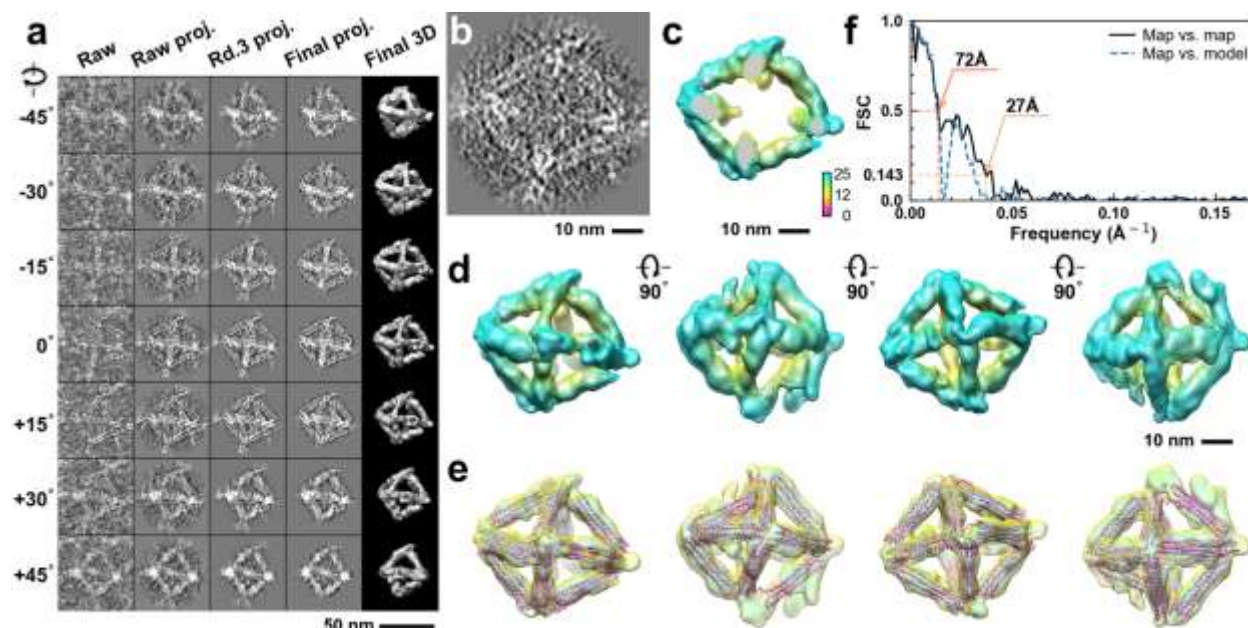

**Supplementary Fig. 239: IPET 3D reconstruction and model fitting of an individual unit-cell particle (Index: 231) within a 2D lattice with 0% ferritin loading.** **a**, Seven representative tilt images of a single unit-cell particle are shown in the first column (from left). The tilt images are aligned to a common center using IPET through iterative refinement. The projections of the raw, intermediate, and final 3D reconstruction at the corresponding angles are displayed in the subsequent four columns. **b**, A central cross-section (~23 nm thick) of the final reconstruction before masking is applied. **c**, 3D views of the central cross-section. **d**, Final 3D density map of this particle, viewed from four perpendicular directions. **e**, Final 3D reconstruction superimposed with the fitted model, viewed from four perpendicular directions. **f**, FSC analyses of the final map resolution using two methods: map-map FSC, where each map is reconstructed from one half of the images (even vs. odd tilt angle indices), and map-model FSC, where the model map is generated from the fitted model. Resolution assessments are provided based on tilt-based map-map and map-model FSC analyses at thresholds of FSC=0.5 and 0.143, respectively.

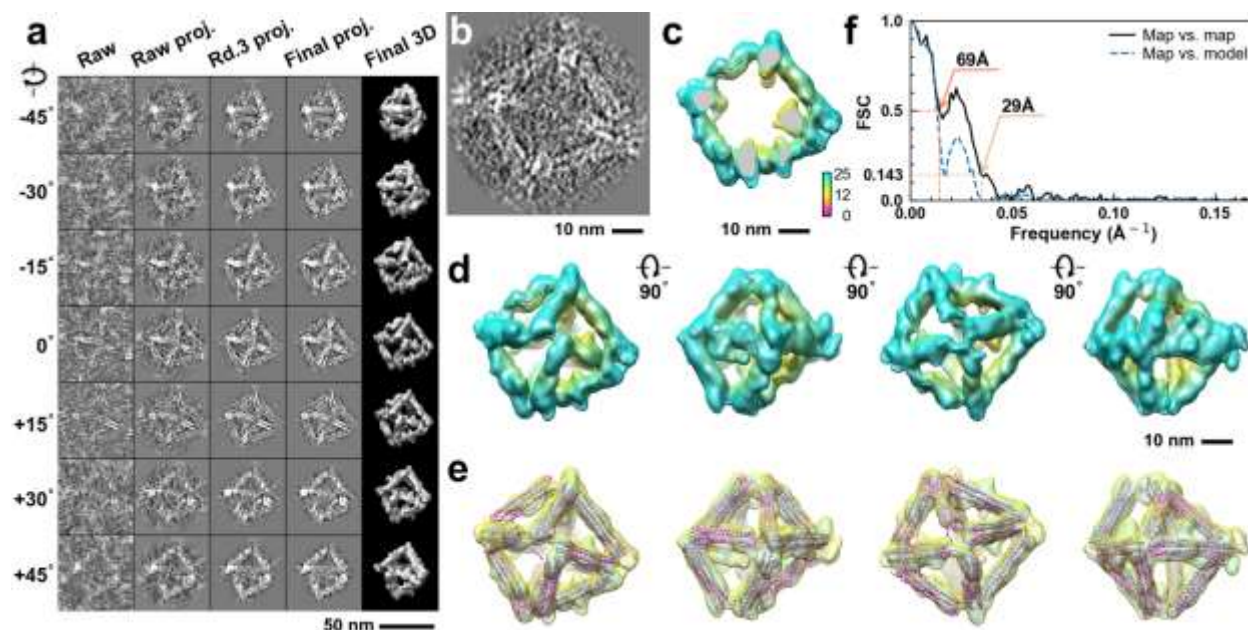

**Supplementary Fig. 240: IPET 3D reconstruction and model fitting of an individual unit-cell particle (Index: 232) within a 2D lattice with 0% ferritin loading.** **a**, Seven representative tilt images of a single unit-cell particle are shown in the first column (from left). The tilt images are aligned to a common center using IPET through iterative refinement. The projections of the raw, intermediate, and final 3D reconstruction at the corresponding angles are displayed in the subsequent four columns. **b**, A central cross-section (~23 nm thick) of the final reconstruction before masking is applied. **c**, 3D views of the central cross-section. **d**, Final 3D density map of this particle, viewed from four perpendicular directions. **e**, Final 3D reconstruction superimposed with the fitted model, viewed from four perpendicular directions. **f**, FSC analyses of the final map resolution using two methods: map-map FSC, where each map is reconstructed from one half of the images (even vs. odd tilt angle indices), and map-model FSC, where the model map is generated from the fitted model. Resolution assessments are provided based on tilt-based map-map and map-model FSC analyses at thresholds of FSC=0.5 and 0.143, respectively.

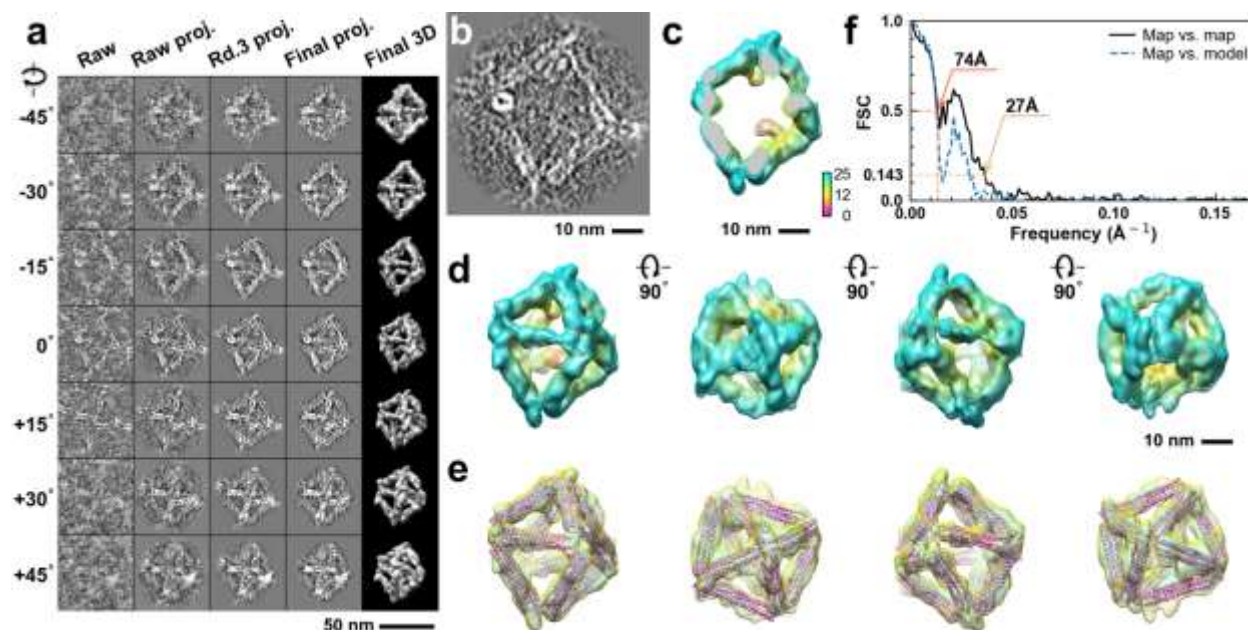

**Supplementary Fig. 241: IPET 3D reconstruction and model fitting of an individual unit-cell particle (Index: 233) within a 2D lattice with 0% ferritin loading.** **a**, Seven representative tilt images of a single unit-cell particle are shown in the first column (from left). The tilt images are aligned to a common center using IPET through iterative refinement. The projections of the raw, intermediate, and final 3D reconstruction at the corresponding angles are displayed in the subsequent four columns. **b**, A central cross-section (~23 nm thick) of the final reconstruction before masking is applied. **c**, 3D views of the central cross-section. **d**, Final 3D density map of this particle, viewed from four perpendicular directions. **e**, Final 3D reconstruction superimposed with the fitted model, viewed from four perpendicular directions. **f**, FSC analyses of the final map resolution using two methods: map-map FSC, where each map is reconstructed from one half of the images (even vs. odd tilt angle indices), and map-model FSC, where the model map is generated from the fitted model. Resolution assessments are provided based on tilt-based map-map and map-model FSC analyses at thresholds of FSC=0.5 and 0.143, respectively.



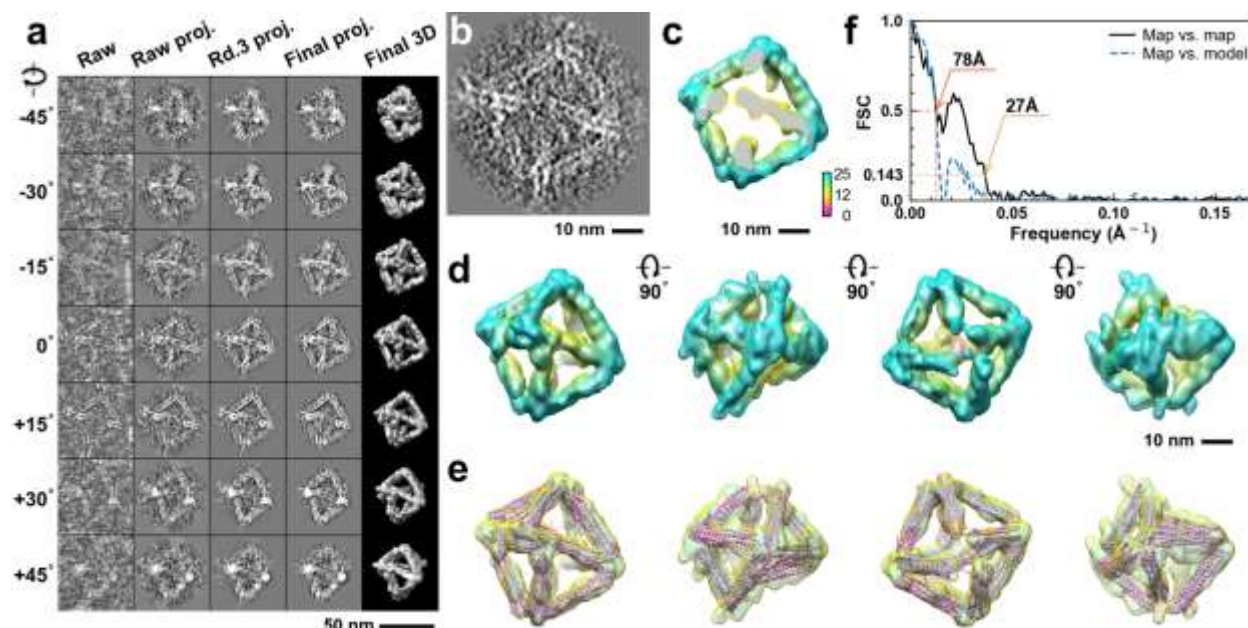

**Supplementary Fig. 242: IPET 3D reconstruction and model fitting of an individual unit-cell particle (Index: 234) within a 2D lattice with 0% ferritin loading.** **a**, Seven representative tilt images of a single unit-cell particle are shown in the first column (from left). The tilt images are aligned to a common center using IPET through iterative refinement. The projections of the raw, intermediate, and final 3D reconstruction at the corresponding angles are displayed in the subsequent four columns. **b**, A central cross-section (~23 nm thick) of the final reconstruction before masking is applied. **c**, 3D views of the central cross-section. **d**, Final 3D density map of this particle, viewed from four perpendicular directions. **e**, Final 3D reconstruction superimposed with the fitted model, viewed from four perpendicular directions. **f**, FSC analyses of the final map resolution using two methods: map-map FSC, where each map is reconstructed from one half of the images (even vs. odd tilt angle indices), and map-model FSC, where the model map is generated from the fitted model. Resolution assessments are provided based on tilt-based map-map and map-model FSC analyses at thresholds of FSC=0.5 and 0.143, respectively.

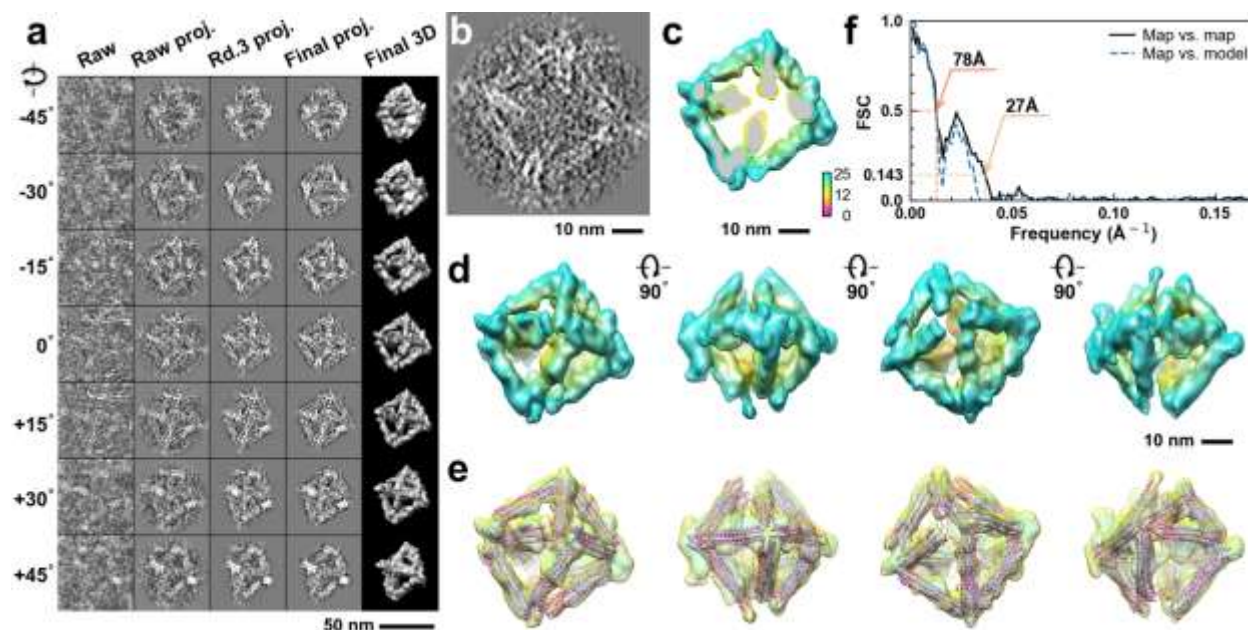

**Supplementary Fig. 243: IPET 3D reconstruction and model fitting of an individual unit-cell particle (Index: 235) within a 2D lattice with 0% ferritin loading.** **a**, Seven representative tilt images of a single unit-cell particle are shown in the first column (from left). The tilt images are aligned to a common center using IPET through iterative refinement. The projections of the raw, intermediate, and final 3D reconstruction at the corresponding angles are displayed in the subsequent four columns. **b**, A central cross-section (~23 nm thick) of the final reconstruction before masking is applied. **c**, 3D views of the central cross-section. **d**, Final 3D density map of this particle, viewed from four perpendicular directions. **e**, Final 3D reconstruction superimposed with the fitted model, viewed from four perpendicular directions. **f**, FSC analyses of the final map resolution using two methods: map-map FSC, where each map is reconstructed from one half of the images (even vs. odd tilt angle indices), and map-model FSC, where the model map is generated from the fitted model. Resolution assessments are provided based on tilt-based map-map and map-model FSC analyses at thresholds of FSC=0.5 and 0.143, respectively.

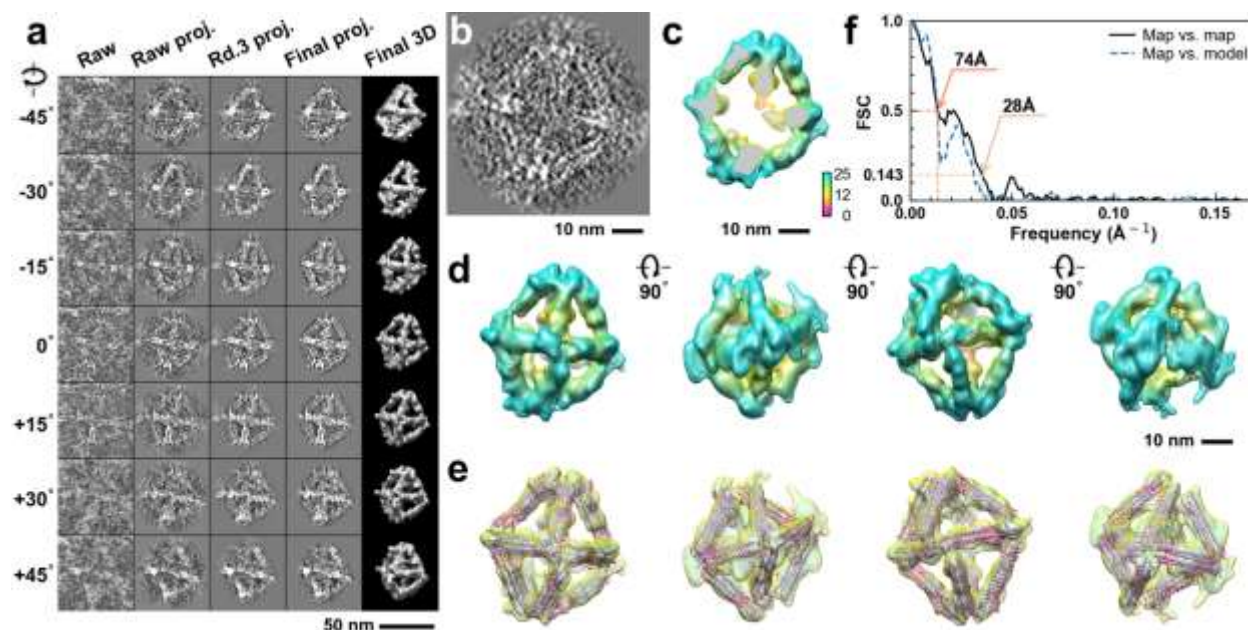

**Supplementary Fig. 244: IPET 3D reconstruction and model fitting of an individual unit-cell particle (Index: 236) within a 2D lattice with 0% ferritin loading.** **a**, Seven representative tilt images of a single unit-cell particle are shown in the first column (from left). The tilt images are aligned to a common center using IPET through iterative refinement. The projections of the raw, intermediate, and final 3D reconstruction at the corresponding angles are displayed in the subsequent four columns. **b**, A central cross-section (~23 nm thick) of the final reconstruction before masking is applied. **c**, 3D views of the central cross-section. **d**, Final 3D density map of this particle, viewed from four perpendicular directions. **e**, Final 3D reconstruction superimposed with the fitted model, viewed from four perpendicular directions. **f**, FSC analyses of the final map resolution using two methods: map-map FSC, where each map is reconstructed from one half of the images (even vs. odd tilt angle indices), and map-model FSC, where the model map is generated from the fitted model. Resolution assessments are provided based on tilt-based map-map and map-model FSC analyses at thresholds of FSC=0.5 and 0.143, respectively.

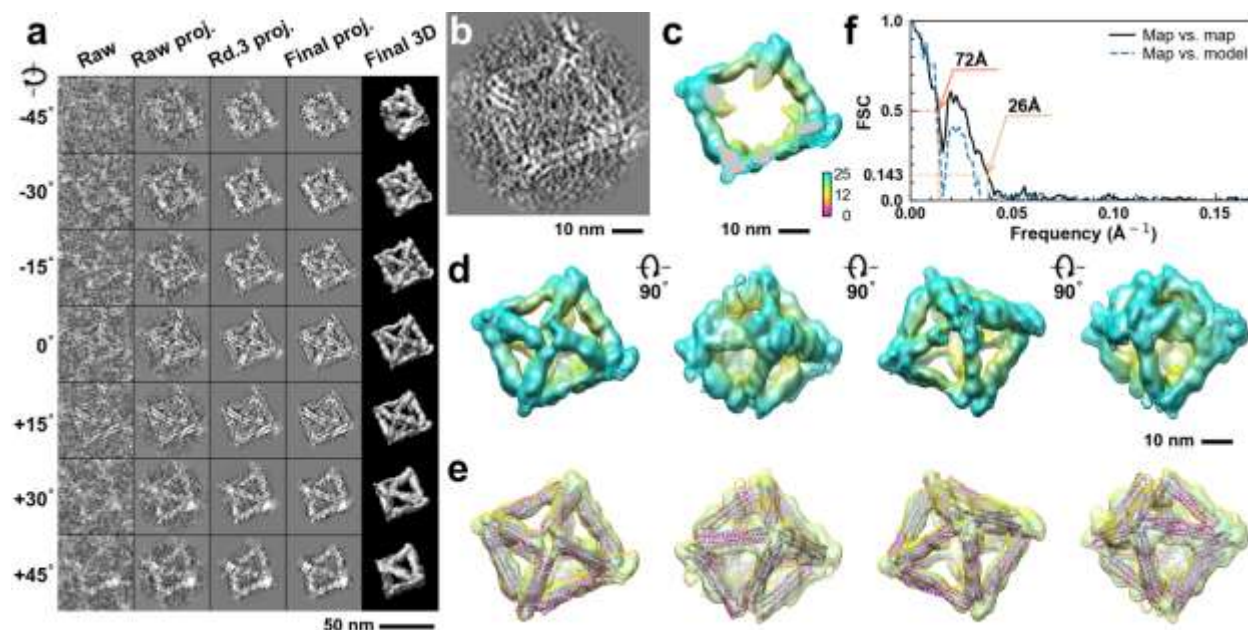

**Supplementary Fig. 245: IPET 3D reconstruction and model fitting of an individual unit-cell particle (Index: 237) within a 2D lattice with 0% ferritin loading.** **a**, Seven representative tilt images of a single unit-cell particle are shown in the first column (from left). The tilt images are aligned to a common center using IPET through iterative refinement. The projections of the raw, intermediate, and final 3D reconstruction at the corresponding angles are displayed in the subsequent four columns. **b**, A central cross-section (~23 nm thick) of the final reconstruction before masking is applied. **c**, 3D views of the central cross-section. **d**, Final 3D density map of this particle, viewed from four perpendicular directions. **e**, Final 3D reconstruction superimposed with the fitted model, viewed from four perpendicular directions. **f**, FSC analyses of the final map resolution using two methods: map-map FSC, where each map is reconstructed from one half of the images (even vs. odd tilt angle indices), and map-model FSC, where the model map is generated from the fitted model. Resolution assessments are provided based on tilt-based map-map and map-model FSC analyses at thresholds of FSC=0.5 and 0.143, respectively.



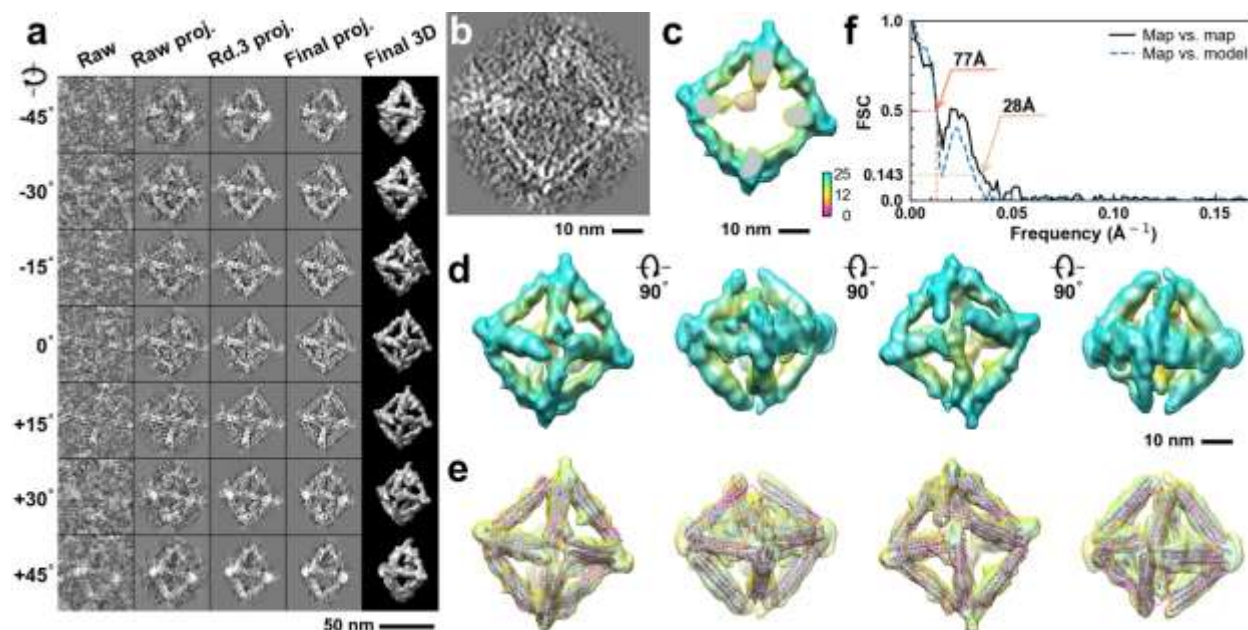

**Supplementary Fig. 246: IPET 3D reconstruction and model fitting of an individual unit-cell particle (Index: 238) within a 2D lattice with 0% ferritin loading.** **a**, Seven representative tilt images of a single unit-cell particle are shown in the first column (from left). The tilt images are aligned to a common center using IPET through iterative refinement. The projections of the raw, intermediate, and final 3D reconstruction at the corresponding angles are displayed in the subsequent four columns. **b**, A central cross-section (~23 nm thick) of the final reconstruction before masking is applied. **c**, 3D views of the central cross-section. **d**, Final 3D density map of this particle, viewed from four perpendicular directions. **e**, Final 3D reconstruction superimposed with the fitted model, viewed from four perpendicular directions. **f**, FSC analyses of the final map resolution using two methods: map-map FSC, where each map is reconstructed from one half of the images (even vs. odd tilt angle indices), and map-model FSC, where the model map is generated from the fitted model. Resolution assessments are provided based on tilt-based map-map and map-model FSC analyses at thresholds of FSC=0.5 and 0.143, respectively.

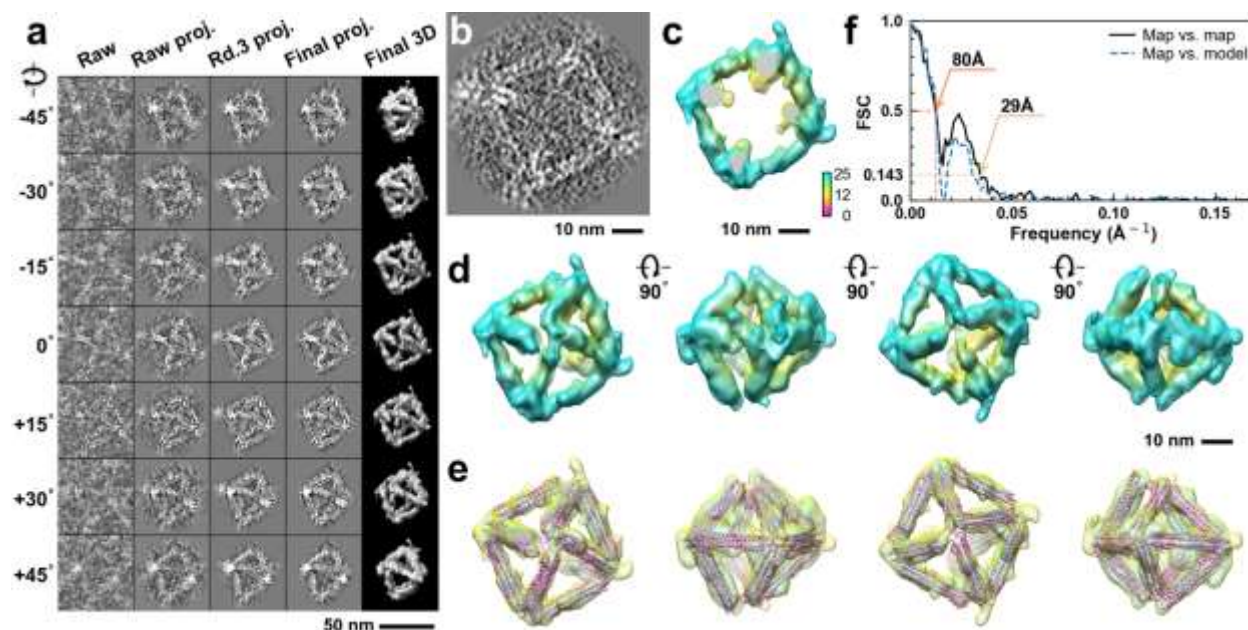

**Supplementary Fig. 247: IPET 3D reconstruction and model fitting of an individual unit-cell particle (Index: 239) within a 2D lattice with 0% ferritin loading.** **a**, Seven representative tilt images of a single unit-cell particle are shown in the first column (from left). The tilt images are aligned to a common center using IPET through iterative refinement. The projections of the raw, intermediate, and final 3D reconstruction at the corresponding angles are displayed in the subsequent four columns. **b**, A central cross-section (~23 nm thick) of the final reconstruction before masking is applied. **c**, 3D views of the central cross-section. **d**, Final 3D density map of this particle, viewed from four perpendicular directions. **e**, Final 3D reconstruction superimposed with the fitted model, viewed from four perpendicular directions. **f**, FSC analyses of the final map resolution using two methods: map-map FSC, where each map is reconstructed from one half of the images (even vs. odd tilt angle indices), and map-model FSC, where the model map is generated from the fitted model. Resolution assessments are provided based on tilt-based map-map and map-model FSC analyses at thresholds of FSC=0.5 and 0.143, respectively.

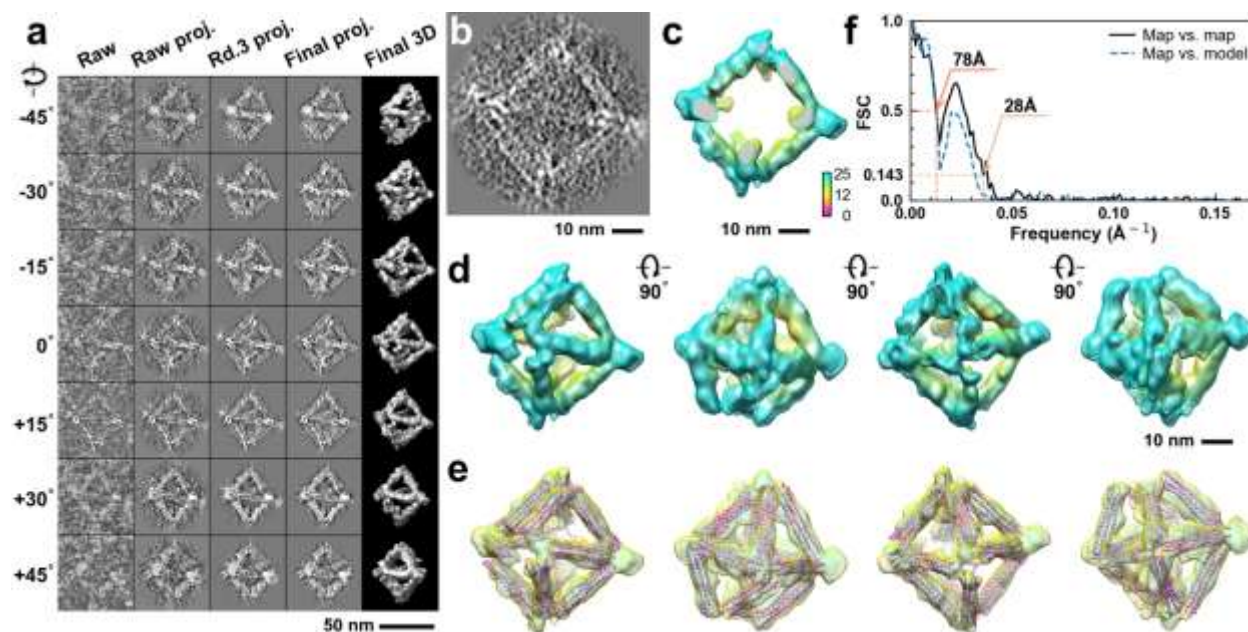

**Supplementary Fig. 248: IPET 3D reconstruction and model fitting of an individual unit-cell particle (Index: 240) within a 2D lattice with 0% ferritin loading.** **a**, Seven representative tilt images of a single unit-cell particle are shown in the first column (from left). The tilt images are aligned to a common center using IPET through iterative refinement. The projections of the raw, intermediate, and final 3D reconstruction at the corresponding angles are displayed in the subsequent four columns. **b**, A central cross-section (~23 nm thick) of the final reconstruction before masking is applied. **c**, 3D views of the central cross-section. **d**, Final 3D density map of this particle, viewed from four perpendicular directions. **e**, Final 3D reconstruction superimposed with the fitted model, viewed from four perpendicular directions. **f**, FSC analyses of the final map resolution using two methods: map-map FSC, where each map is reconstructed from one half of the images (even vs. odd tilt angle indices), and map-model FSC, where the model map is generated from the fitted model. Resolution assessments are provided based on tilt-based map-map and map-model FSC analyses at thresholds of FSC=0.5 and 0.143, respectively.

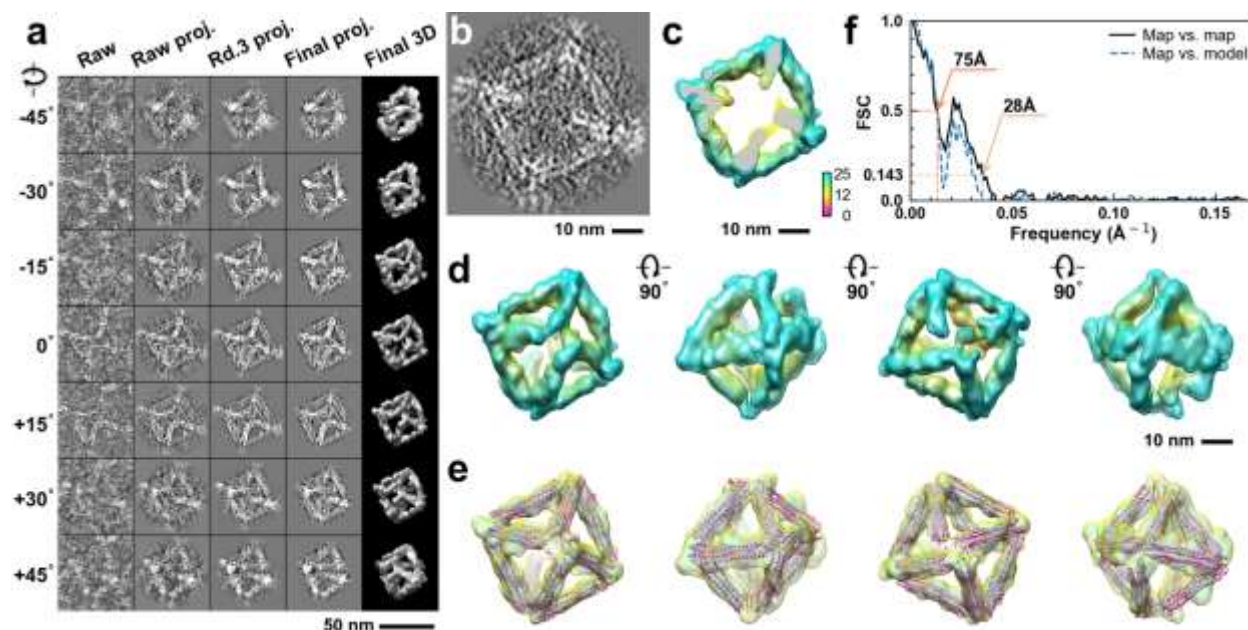

**Supplementary Fig. 249: IPET 3D reconstruction and model fitting of an individual unit-cell particle (Index: 241) within a 2D lattice with 0% ferritin loading.** **a**, Seven representative tilt images of a single unit-cell particle are shown in the first column (from left). The tilt images are aligned to a common center using IPET through iterative refinement. The projections of the raw, intermediate, and final 3D reconstruction at the corresponding angles are displayed in the subsequent four columns. **b**, A central cross-section (~23 nm thick) of the final reconstruction before masking is applied. **c**, 3D views of the central cross-section. **d**, Final 3D density map of this particle, viewed from four perpendicular directions. **e**, Final 3D reconstruction superimposed with the fitted model, viewed from four perpendicular directions. **f**, FSC analyses of the final map resolution using two methods: map-map FSC, where each map is reconstructed from one half of the images (even vs. odd tilt angle indices), and map-model FSC, where the model map is generated from the fitted model. Resolution assessments are provided based on tilt-based map-map and map-model FSC analyses at thresholds of FSC=0.5 and 0.143, respectively.



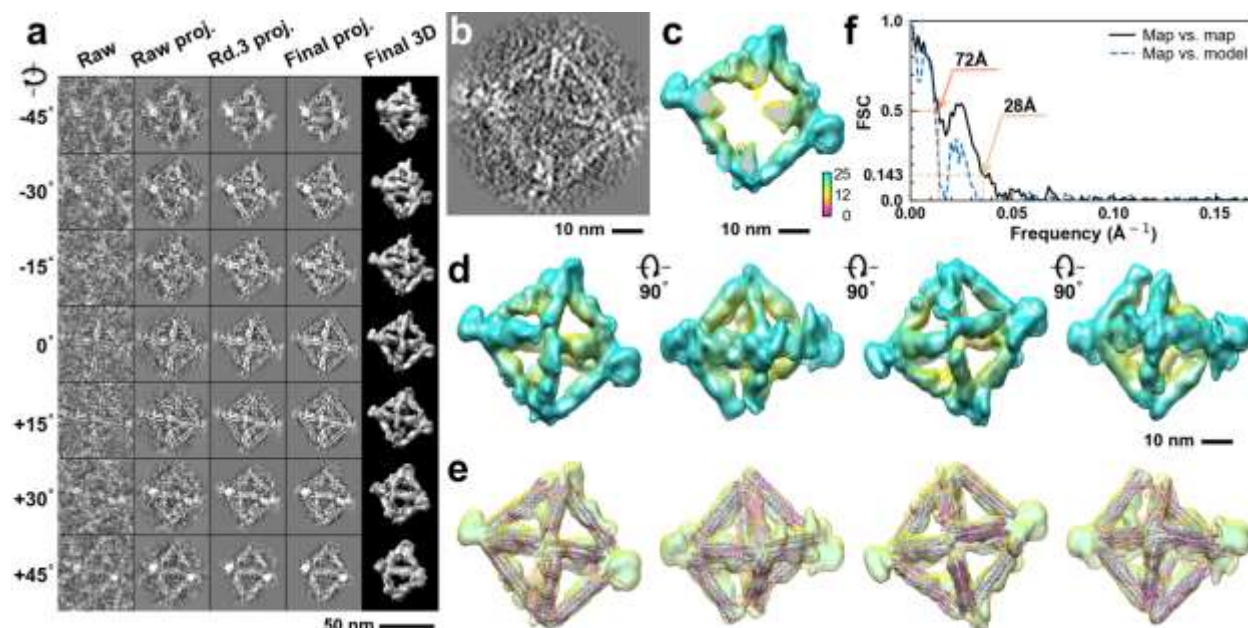

**Supplementary Fig. 250: IPET 3D reconstruction and model fitting of an individual unit-cell particle (Index: 242) within a 2D lattice with 0% ferritin loading.** **a**, Seven representative tilt images of a single unit-cell particle are shown in the first column (from left). The tilt images are aligned to a common center using IPET through iterative refinement. The projections of the raw, intermediate, and final 3D reconstruction at the corresponding angles are displayed in the subsequent four columns. **b**, A central cross-section (~23 nm thick) of the final reconstruction before masking is applied. **c**, 3D views of the central cross-section. **d**, Final 3D density map of this particle, viewed from four perpendicular directions. **e**, Final 3D reconstruction superimposed with the fitted model, viewed from four perpendicular directions. **f**, FSC analyses of the final map resolution using two methods: map-map FSC, where each map is reconstructed from one half of the images (even vs. odd tilt angle indices), and map-model FSC, where the model map is generated from the fitted model. Resolution assessments are provided based on tilt-based map-map and map-model FSC analyses at thresholds of FSC=0.5 and 0.143, respectively.

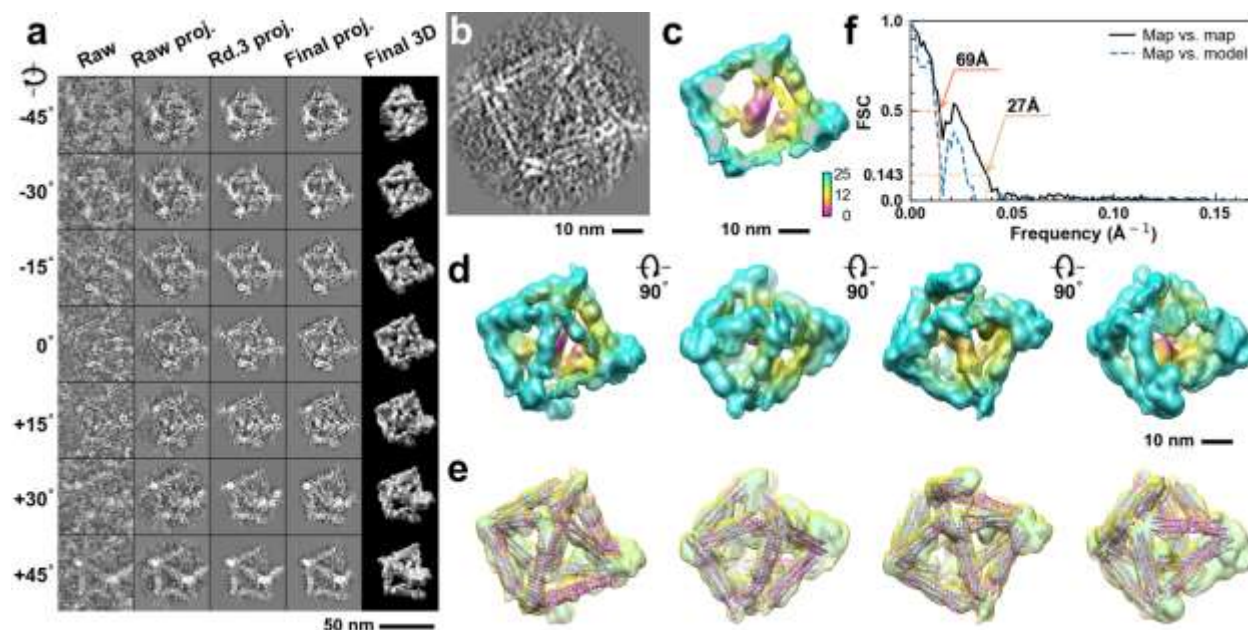

**Supplementary Fig. 251: IPET 3D reconstruction and model fitting of an individual unit-cell particle (Index: 243) within a 2D lattice with 0% ferritin loading.** **a**, Seven representative tilt images of a single unit-cell particle are shown in the first column (from left). The tilt images are aligned to a common center using IPET through iterative refinement. The projections of the raw, intermediate, and final 3D reconstruction at the corresponding angles are displayed in the subsequent four columns. **b**, A central cross-section (~23 nm thick) of the final reconstruction before masking is applied. **c**, 3D views of the central cross-section. **d**, Final 3D density map of this particle, viewed from four perpendicular directions. **e**, Final 3D reconstruction superimposed with the fitted model, viewed from four perpendicular directions. **f**, FSC analyses of the final map resolution using two methods: map-map FSC, where each map is reconstructed from one half of the images (even vs. odd tilt angle indices), and map-model FSC, where the model map is generated from the fitted model. Resolution assessments are provided based on tilt-based map-map and map-model FSC analyses at thresholds of FSC=0.5 and 0.143, respectively.

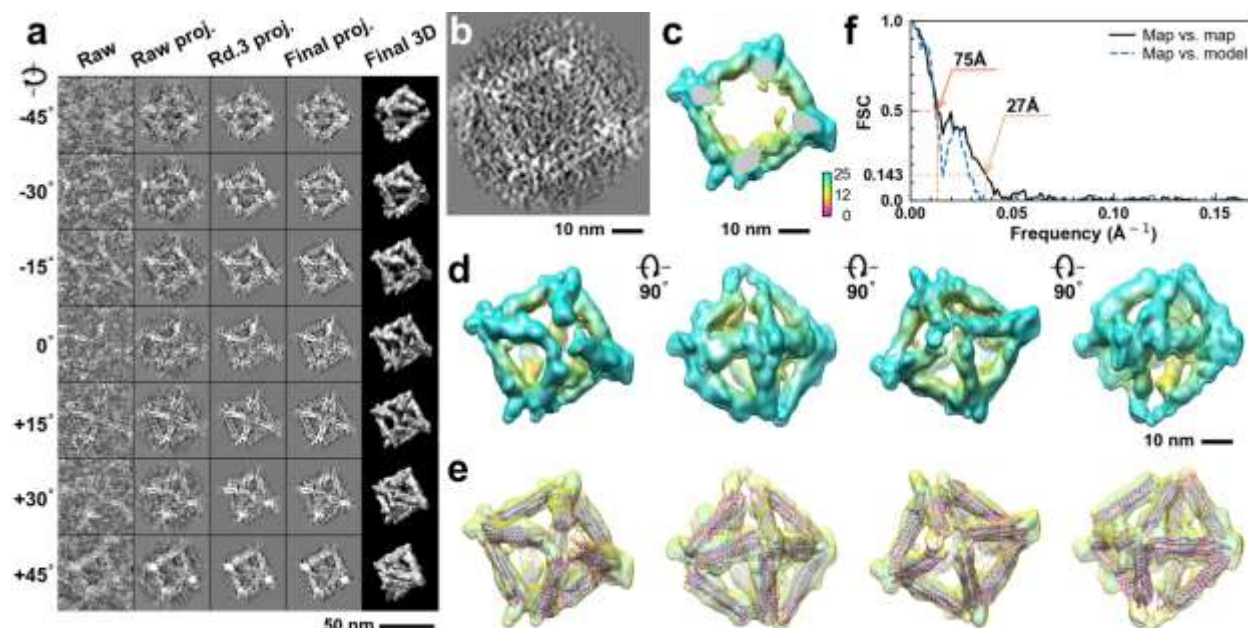

**Supplementary Fig. 252: IPET 3D reconstruction and model fitting of an individual unit-cell particle (Index: 244) within a 2D lattice with 0% ferritin loading.** **a**, Seven representative tilt images of a single unit-cell particle are shown in the first column (from left). The tilt images are aligned to a common center using IPET through iterative refinement. The projections of the raw, intermediate, and final 3D reconstruction at the corresponding angles are displayed in the subsequent four columns. **b**, A central cross-section (~23 nm thick) of the final reconstruction before masking is applied. **c**, 3D views of the central cross-section. **d**, Final 3D density map of this particle, viewed from four perpendicular directions. **e**, Final 3D reconstruction superimposed with the fitted model, viewed from four perpendicular directions. **f**, FSC analyses of the final map resolution using two methods: map-map FSC, where each map is reconstructed from one half of the images (even vs. odd tilt angle indices), and map-model FSC, where the model map is generated from the fitted model. Resolution assessments are provided based on tilt-based map-map and map-model FSC analyses at thresholds of FSC=0.5 and 0.143, respectively.

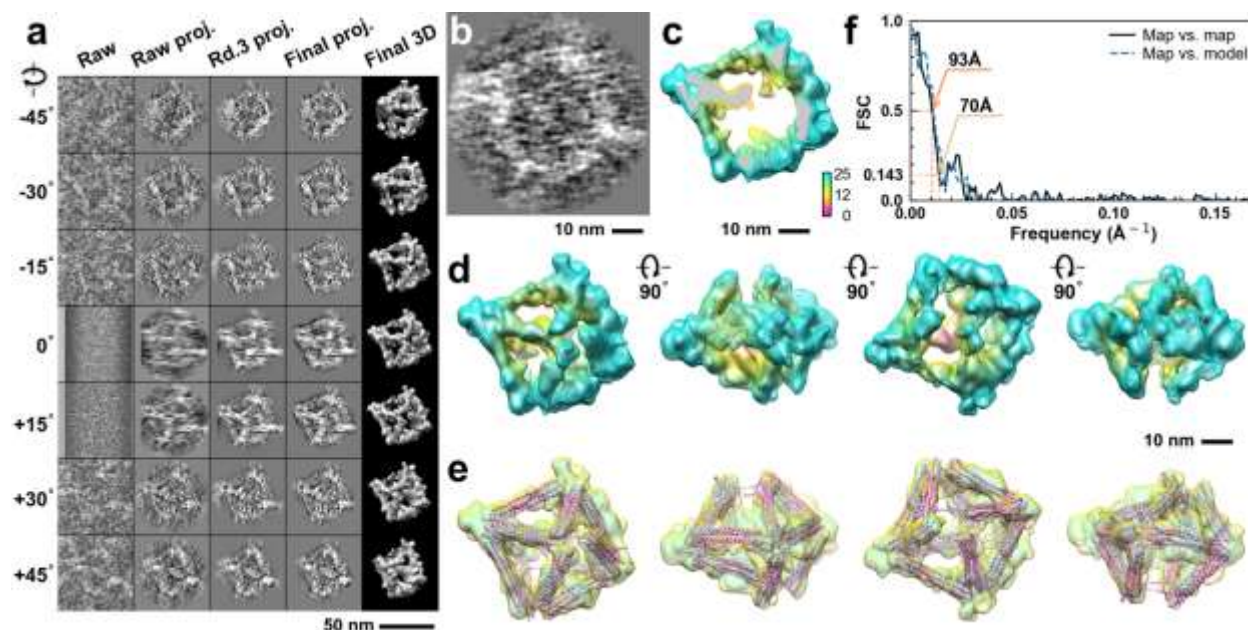

**Supplementary Fig. 253: IPET 3D reconstruction and model fitting of an individual unit-cell particle (Index: 245) within a 2D lattice with 0% ferritin loading.** **a**, Seven representative tilt images of a single unit-cell particle are shown in the first column (from left). The tilt images are aligned to a common center using IPET through iterative refinement. The projections of the raw, intermediate, and final 3D reconstruction at the corresponding angles are displayed in the subsequent four columns. **b**, A central cross-section (~23 nm thick) of the final reconstruction before masking is applied. **c**, 3D views of the central cross-section. **d**, Final 3D density map of this particle, viewed from four perpendicular directions. **e**, Final 3D reconstruction superimposed with the fitted model, viewed from four perpendicular directions. **f**, FSC analyses of the final map resolution using two methods: map-map FSC, where each map is reconstructed from one half of the images (even vs. odd tilt angle indices), and map-model FSC, where the model map is generated from the fitted model. Resolution assessments are provided based on tilt-based map-map and map-model FSC analyses at thresholds of FSC=0.5 and 0.143, respectively.



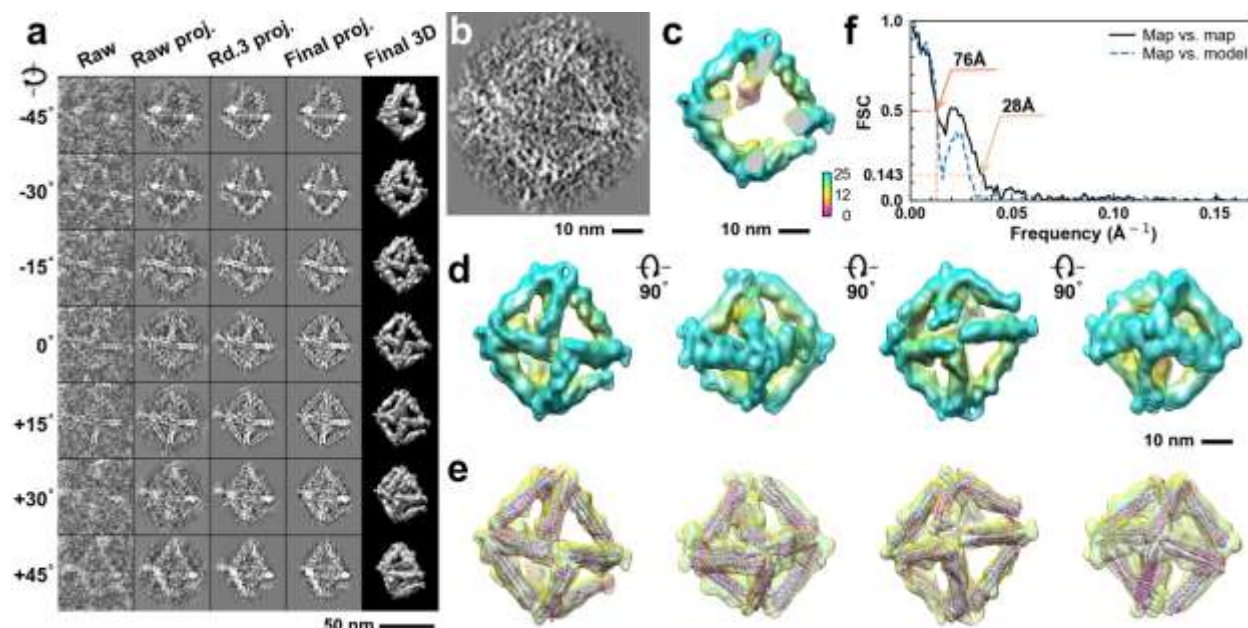

**Supplementary Fig. 254: IPET 3D reconstruction and model fitting of an individual unit-cell particle (Index: 246) within a 2D lattice with 0% ferritin loading.** **a**, Seven representative tilt images of a single unit-cell particle are shown in the first column (from left). The tilt images are aligned to a common center using IPET through iterative refinement. The projections of the raw, intermediate, and final 3D reconstruction at the corresponding angles are displayed in the subsequent four columns. **b**, A central cross-section (~23 nm thick) of the final reconstruction before masking is applied. **c**, 3D views of the central cross-section. **d**, Final 3D density map of this particle, viewed from four perpendicular directions. **e**, Final 3D reconstruction superimposed with the fitted model, viewed from four perpendicular directions. **f**, FSC analyses of the final map resolution using two methods: map-map FSC, where each map is reconstructed from one half of the images (even vs. odd tilt angle indices), and map-model FSC, where the model map is generated from the fitted model. Resolution assessments are provided based on tilt-based map-map and map-model FSC analyses at thresholds of FSC=0.5 and 0.143, respectively.

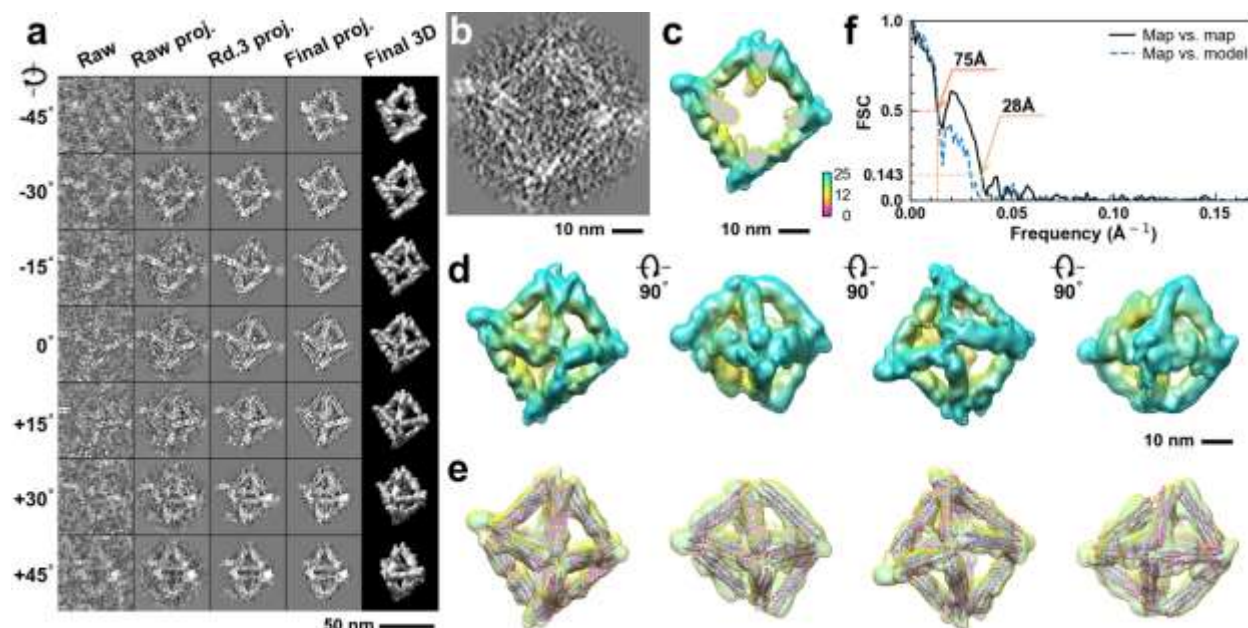

**Supplementary Fig. 255: IPET 3D reconstruction and model fitting of an individual unit-cell particle (Index: 247) within a 2D lattice with 0% ferritin loading.** **a**, Seven representative tilt images of a single unit-cell particle are shown in the first column (from left). The tilt images are aligned to a common center using IPET through iterative refinement. The projections of the raw, intermediate, and final 3D reconstruction at the corresponding angles are displayed in the subsequent four columns. **b**, A central cross-section (~23 nm thick) of the final reconstruction before masking is applied. **c**, 3D views of the central cross-section. **d**, Final 3D density map of this particle, viewed from four perpendicular directions. **e**, Final 3D reconstruction superimposed with the fitted model, viewed from four perpendicular directions. **f**, FSC analyses of the final map resolution using two methods: map-map FSC, where each map is reconstructed from one half of the images (even vs. odd tilt angle indices), and map-model FSC, where the model map is generated from the fitted model. Resolution assessments are provided based on tilt-based map-map and map-model FSC analyses at thresholds of FSC=0.5 and 0.143, respectively.

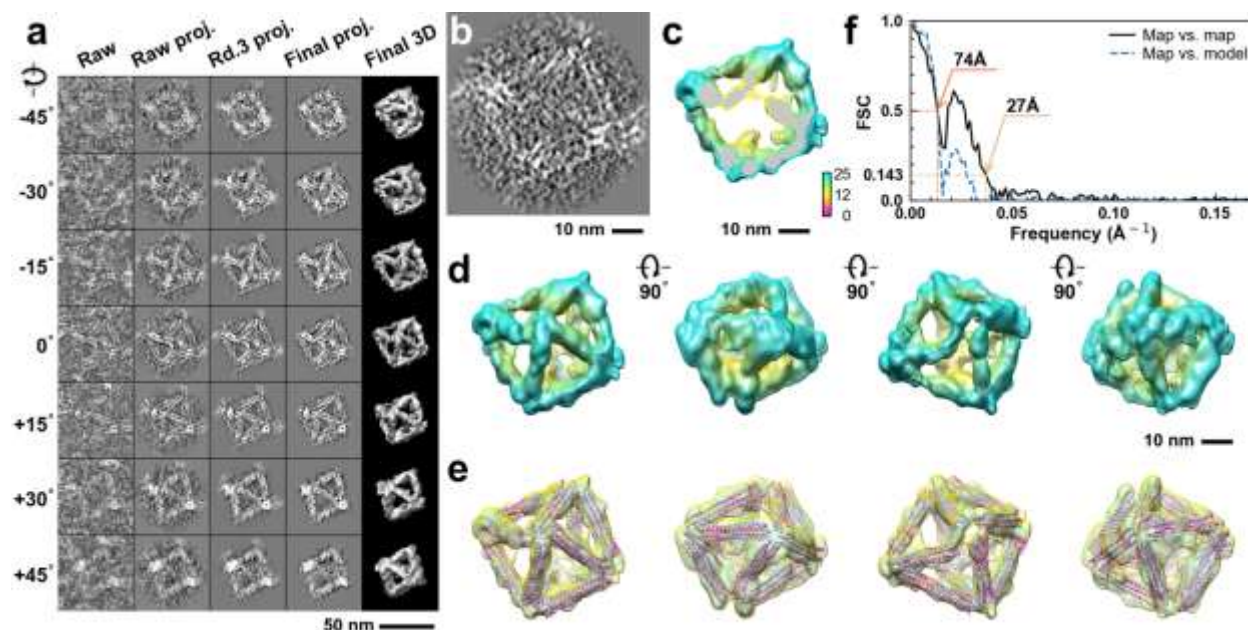

**Supplementary Fig. 256: IPET 3D reconstruction and model fitting of an individual unit-cell particle (Index: 248) within a 2D lattice with 0% ferritin loading.** **a**, Seven representative tilt images of a single unit-cell particle are shown in the first column (from left). The tilt images are aligned to a common center using IPET through iterative refinement. The projections of the raw, intermediate, and final 3D reconstruction at the corresponding angles are displayed in the subsequent four columns. **b**, A central cross-section (~23 nm thick) of the final reconstruction before masking is applied. **c**, 3D views of the central cross-section. **d**, Final 3D density map of this particle, viewed from four perpendicular directions. **e**, Final 3D reconstruction superimposed with the fitted model, viewed from four perpendicular directions. **f**, FSC analyses of the final map resolution using two methods: map-map FSC, where each map is reconstructed from one half of the images (even vs. odd tilt angle indices), and map-model FSC, where the model map is generated from the fitted model. Resolution assessments are provided based on tilt-based map-map and map-model FSC analyses at thresholds of FSC=0.5 and 0.143, respectively.

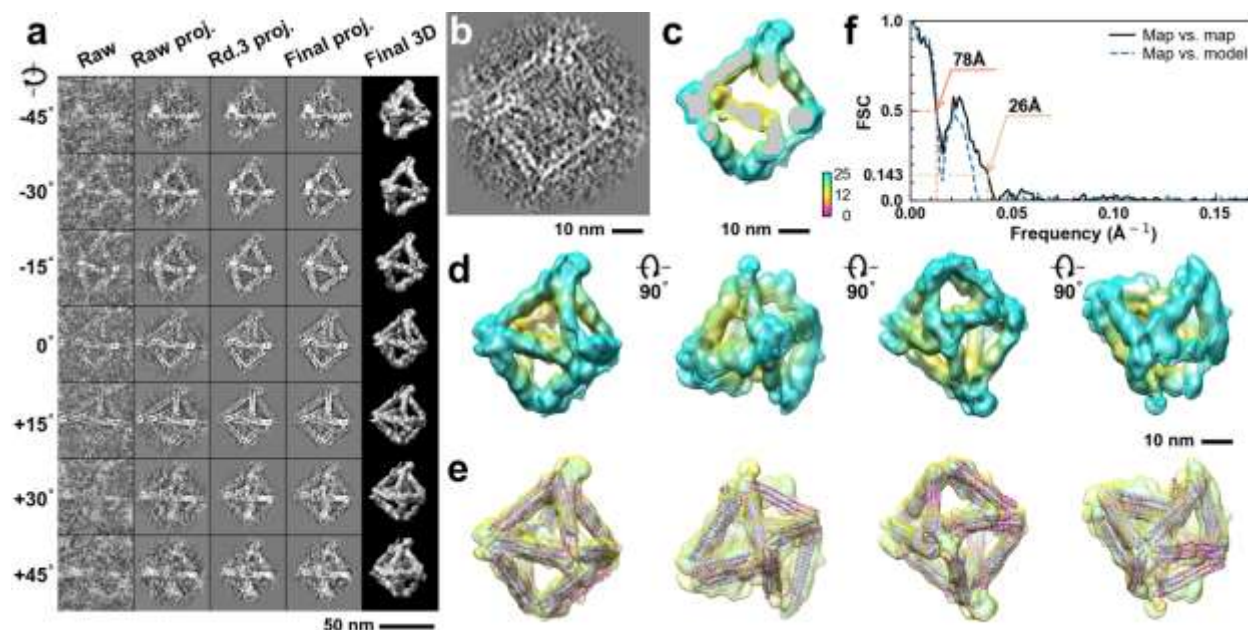

**Supplementary Fig. 257: IPET 3D reconstruction and model fitting of an individual unit-cell particle (Index: 249) within a 2D lattice with 0% ferritin loading.** **a**, Seven representative tilt images of a single unit-cell particle are shown in the first column (from left). The tilt images are aligned to a common center using IPET through iterative refinement. The projections of the raw, intermediate, and final 3D reconstruction at the corresponding angles are displayed in the subsequent four columns. **b**, A central cross-section (~23 nm thick) of the final reconstruction before masking is applied. **c**, 3D views of the central cross-section. **d**, Final 3D density map of this particle, viewed from four perpendicular directions. **e**, Final 3D reconstruction superimposed with the fitted model, viewed from four perpendicular directions. **f**, FSC analyses of the final map resolution using two methods: map-map FSC, where each map is reconstructed from one half of the images (even vs. odd tilt angle indices), and map-model FSC, where the model map is generated from the fitted model. Resolution assessments are provided based on tilt-based map-map and map-model FSC analyses at thresholds of FSC=0.5 and 0.143, respectively.



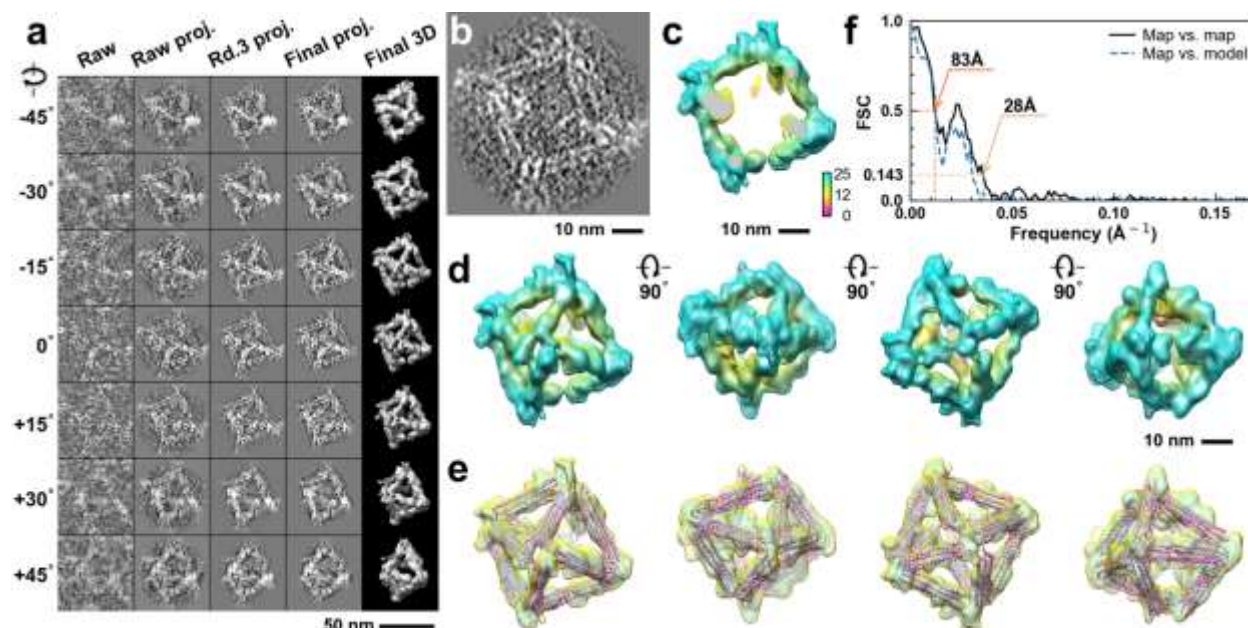

**Supplementary Fig. 258: IPET 3D reconstruction and model fitting of an individual unit-cell particle (Index: 250) within a 2D lattice with 0% ferritin loading.** **a**, Seven representative tilt images of a single unit-cell particle are shown in the first column (from left). The tilt images are aligned to a common center using IPET through iterative refinement. The projections of the raw, intermediate, and final 3D reconstruction at the corresponding angles are displayed in the subsequent four columns. **b**, A central cross-section (~23 nm thick) of the final reconstruction before masking is applied. **c**, 3D views of the central cross-section. **d**, Final 3D density map of this particle, viewed from four perpendicular directions. **e**, Final 3D reconstruction superimposed with the fitted model, viewed from four perpendicular directions. **f**, FSC analyses of the final map resolution using two methods: map-map FSC, where each map is reconstructed from one half of the images (even vs. odd tilt angle indices), and map-model FSC, where the model map is generated from the fitted model. Resolution assessments are provided based on tilt-based map-map and map-model FSC analyses at thresholds of FSC=0.5 and 0.143, respectively.

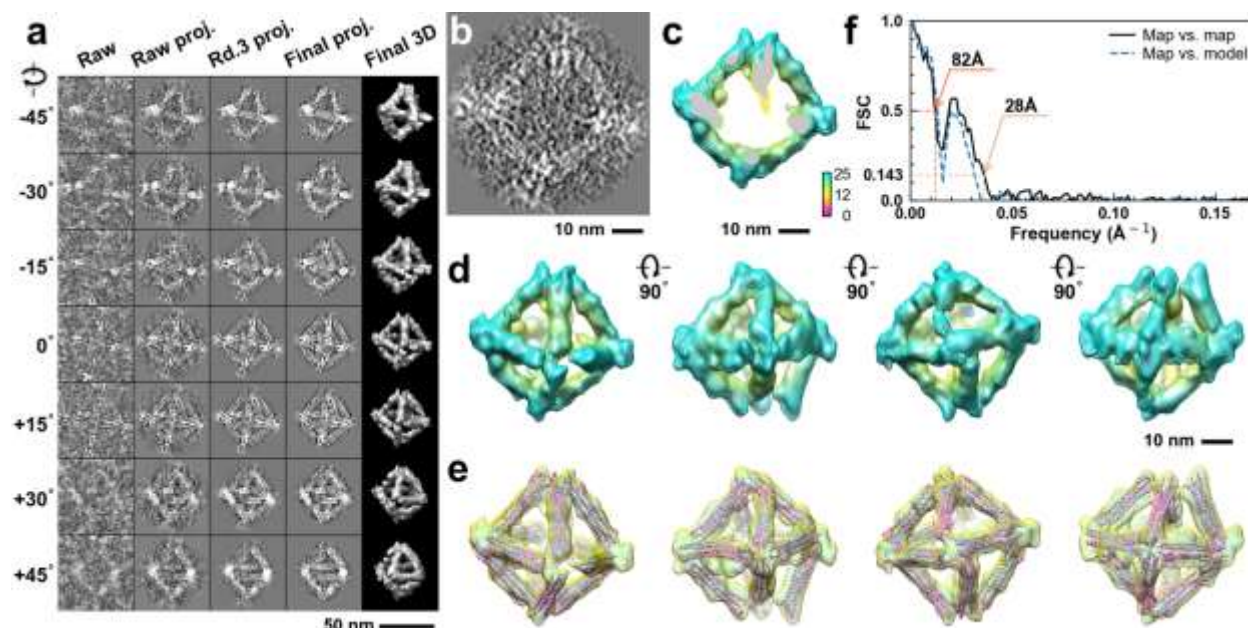

**Supplementary Fig. 259: IPET 3D reconstruction and model fitting of an individual unit-cell particle (Index: 251) within a 2D lattice with 0% ferritin loading.** **a**, Seven representative tilt images of a single unit-cell particle are shown in the first column (from left). The tilt images are aligned to a common center using IPET through iterative refinement. The projections of the raw, intermediate, and final 3D reconstruction at the corresponding angles are displayed in the subsequent four columns. **b**, A central cross-section (~23 nm thick) of the final reconstruction before masking is applied. **c**, 3D views of the central cross-section. **d**, Final 3D density map of this particle, viewed from four perpendicular directions. **e**, Final 3D reconstruction superimposed with the fitted model, viewed from four perpendicular directions. **f**, FSC analyses of the final map resolution using two methods: map-map FSC, where each map is reconstructed from one half of the images (even vs. odd tilt angle indices), and map-model FSC, where the model map is generated from the fitted model. Resolution assessments are provided based on tilt-based map-map and map-model FSC analyses at thresholds of FSC=0.5 and 0.143, respectively.

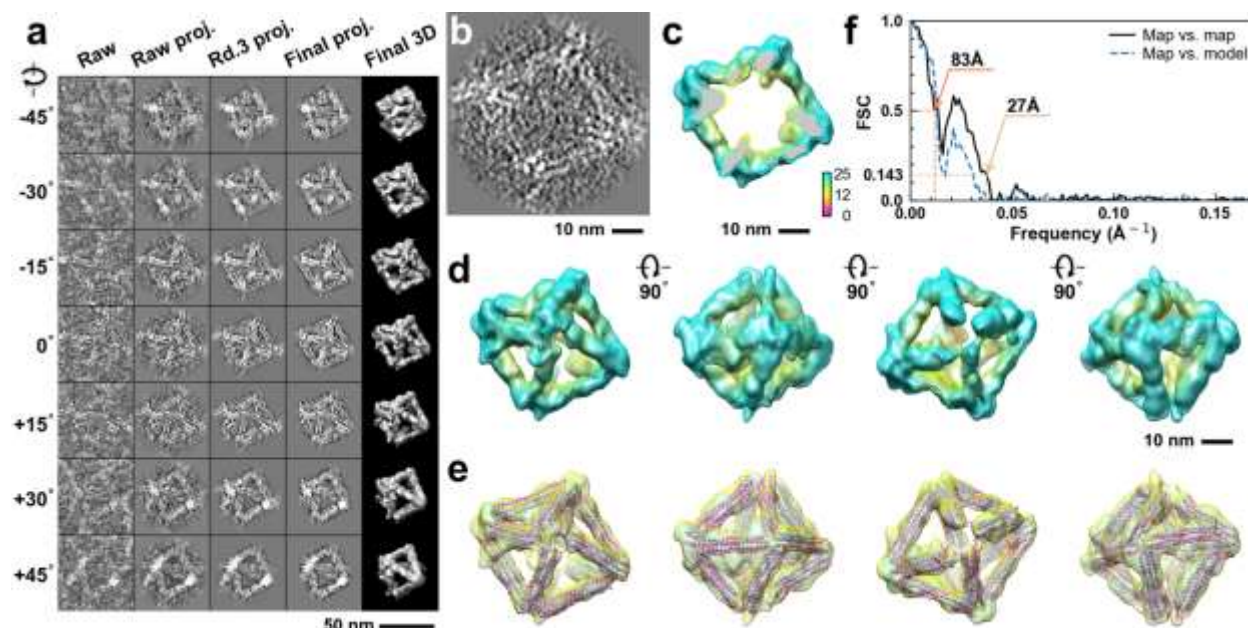

**Supplementary Fig. 260: IPET 3D reconstruction and model fitting of an individual unit-cell particle (Index: 252) within a 2D lattice with 0% ferritin loading.** **a**, Seven representative tilt images of a single unit-cell particle are shown in the first column (from left). The tilt images are aligned to a common center using IPET through iterative refinement. The projections of the raw, intermediate, and final 3D reconstruction at the corresponding angles are displayed in the subsequent four columns. **b**, A central cross-section (~23 nm thick) of the final reconstruction before masking is applied. **c**, 3D views of the central cross-section. **d**, Final 3D density map of this particle, viewed from four perpendicular directions. **e**, Final 3D reconstruction superimposed with the fitted model, viewed from four perpendicular directions. **f**, FSC analyses of the final map resolution using two methods: map-map FSC, where each map is reconstructed from one half of the images (even vs. odd tilt angle indices), and map-model FSC, where the model map is generated from the fitted model. Resolution assessments are provided based on tilt-based map-map and map-model FSC analyses at thresholds of FSC=0.5 and 0.143, respectively.

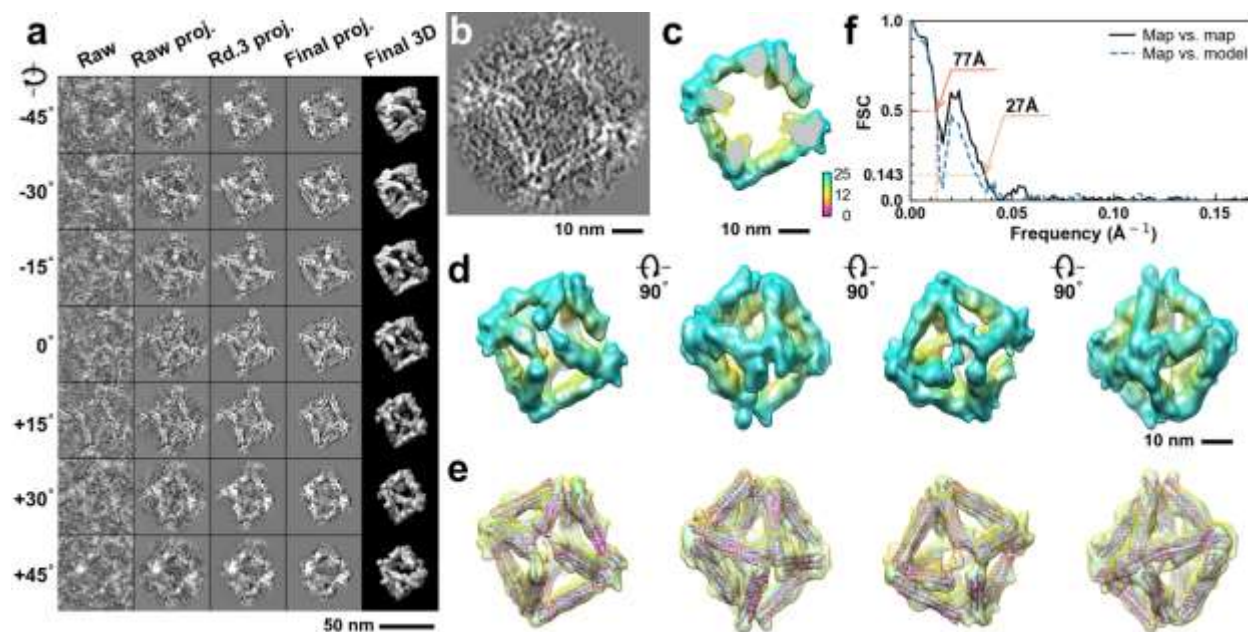

**Supplementary Fig. 261: IPET 3D reconstruction and model fitting of an individual unit-cell particle (Index: 253) within a 2D lattice with 0% ferritin loading.** **a**, Seven representative tilt images of a single unit-cell particle are shown in the first column (from left). The tilt images are aligned to a common center using IPET through iterative refinement. The projections of the raw, intermediate, and final 3D reconstruction at the corresponding angles are displayed in the subsequent four columns. **b**, A central cross-section (~23 nm thick) of the final reconstruction before masking is applied. **c**, 3D views of the central cross-section. **d**, Final 3D density map of this particle, viewed from four perpendicular directions. **e**, Final 3D reconstruction superimposed with the fitted model, viewed from four perpendicular directions. **f**, FSC analyses of the final map resolution using two methods: map-map FSC, where each map is reconstructed from one half of the images (even vs. odd tilt angle indices), and map-model FSC, where the model map is generated from the fitted model. Resolution assessments are provided based on tilt-based map-map and map-model FSC analyses at thresholds of FSC=0.5 and 0.143, respectively.



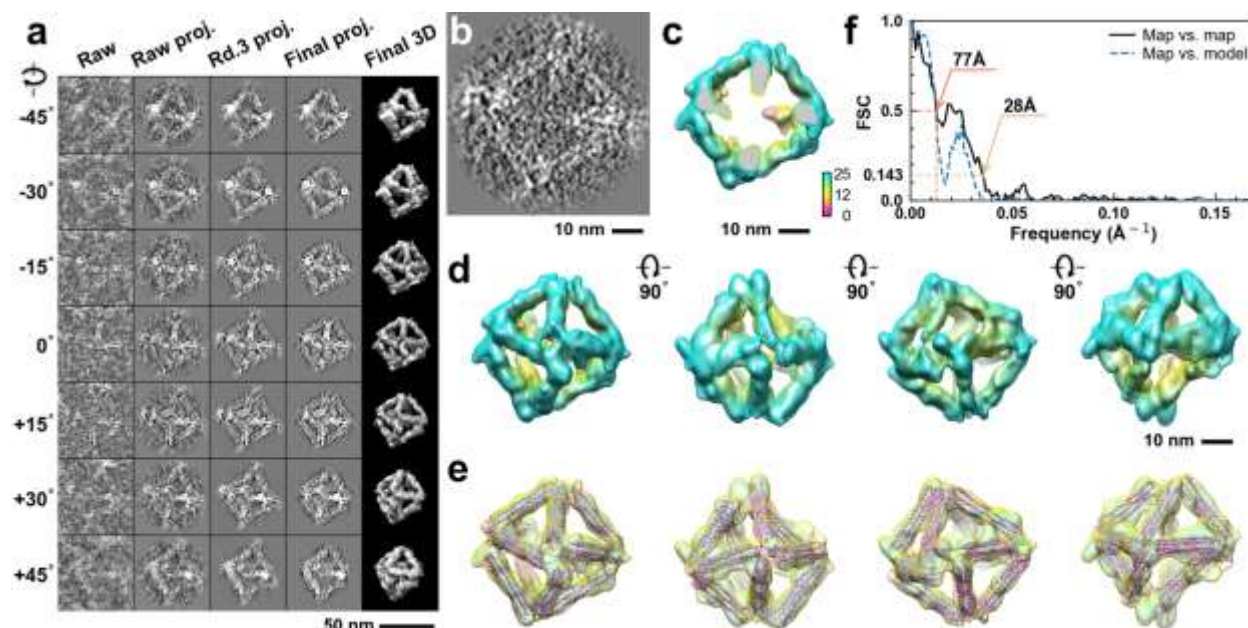

**Supplementary Fig. 262: IPET 3D reconstruction and model fitting of an individual unit-cell particle (Index: 254) within a 2D lattice with 0% ferritin loading.** **a**, Seven representative tilt images of a single unit-cell particle are shown in the first column (from left). The tilt images are aligned to a common center using IPET through iterative refinement. The projections of the raw, intermediate, and final 3D reconstruction at the corresponding angles are displayed in the subsequent four columns. **b**, A central cross-section (~23 nm thick) of the final reconstruction before masking is applied. **c**, 3D views of the central cross-section. **d**, Final 3D density map of this particle, viewed from four perpendicular directions. **e**, Final 3D reconstruction superimposed with the fitted model, viewed from four perpendicular directions. **f**, FSC analyses of the final map resolution using two methods: map-map FSC, where each map is reconstructed from one half of the images (even vs. odd tilt angle indices), and map-model FSC, where the model map is generated from the fitted model. Resolution assessments are provided based on tilt-based map-map and map-model FSC analyses at thresholds of FSC=0.5 and 0.143, respectively.

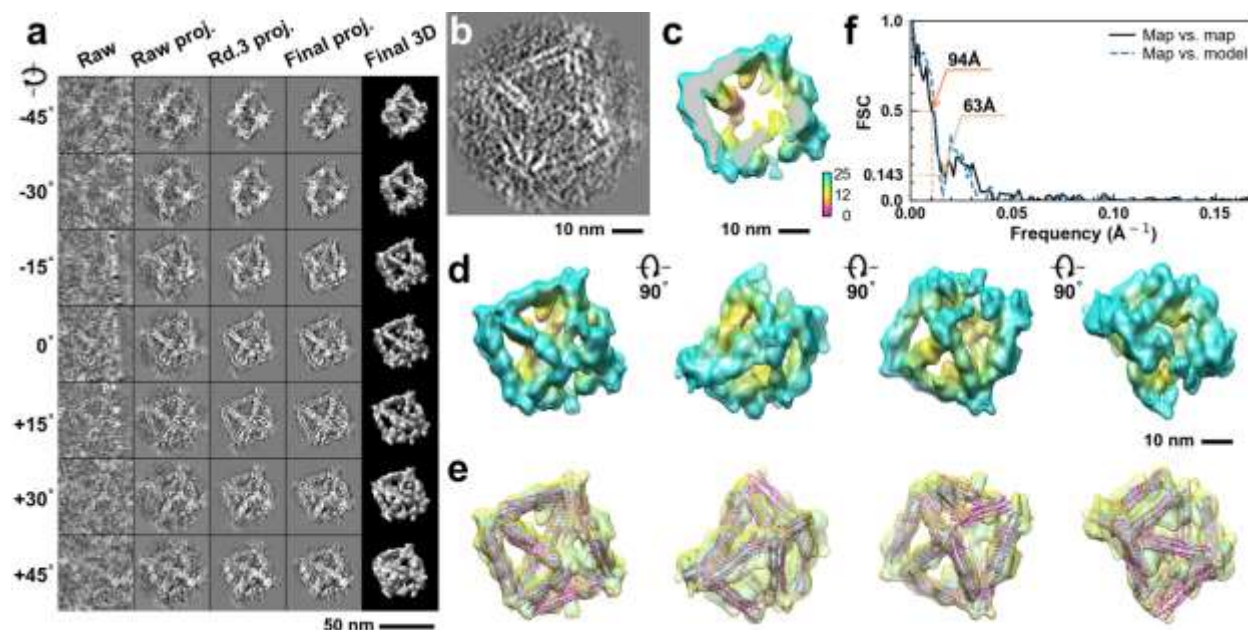

**Supplementary Fig. 263: IPET 3D reconstruction and model fitting of an individual unit-cell particle (Index: 255) within a 2D lattice with 0% ferritin loading.** **a**, Seven representative tilt images of a single unit-cell particle are shown in the first column (from left). The tilt images are aligned to a common center using IPET through iterative refinement. The projections of the raw, intermediate, and final 3D reconstruction at the corresponding angles are displayed in the subsequent four columns. **b**, A central cross-section (~23 nm thick) of the final reconstruction before masking is applied. **c**, 3D views of the central cross-section. **d**, Final 3D density map of this particle, viewed from four perpendicular directions. **e**, Final 3D reconstruction superimposed with the fitted model, viewed from four perpendicular directions. **f**, FSC analyses of the final map resolution using two methods: map-map FSC, where each map is reconstructed from one half of the images (even vs. odd tilt angle indices), and map-model FSC, where the model map is generated from the fitted model. Resolution assessments are provided based on tilt-based map-map and map-model FSC analyses at thresholds of FSC=0.5 and 0.143, respectively.

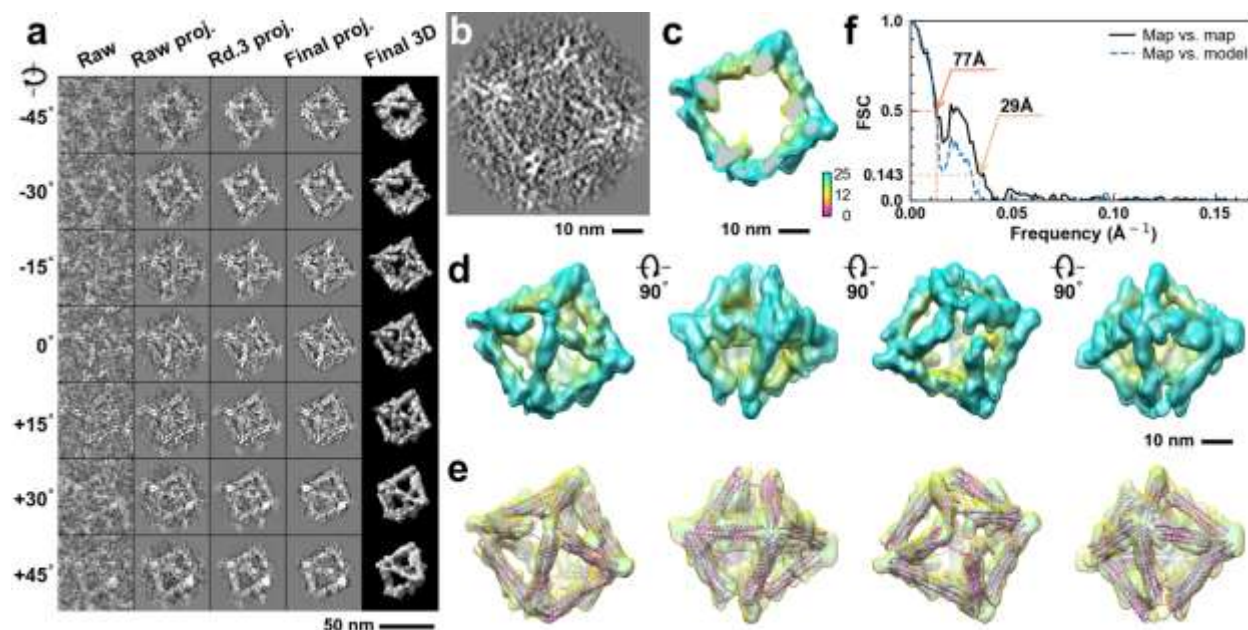

**Supplementary Fig. 264: IPET 3D reconstruction and model fitting of an individual unit-cell particle (Index: 256) within a 2D lattice with 0% ferritin loading.** **a**, Seven representative tilt images of a single unit-cell particle are shown in the first column (from left). The tilt images are aligned to a common center using IPET through iterative refinement. The projections of the raw, intermediate, and final 3D reconstruction at the corresponding angles are displayed in the subsequent four columns. **b**, A central cross-section (~23 nm thick) of the final reconstruction before masking is applied. **c**, 3D views of the central cross-section. **d**, Final 3D density map of this particle, viewed from four perpendicular directions. **e**, Final 3D reconstruction superimposed with the fitted model, viewed from four perpendicular directions. **f**, FSC analyses of the final map resolution using two methods: map-map FSC, where each map is reconstructed from one half of the images (even vs. odd tilt angle indices), and map-model FSC, where the model map is generated from the fitted model. Resolution assessments are provided based on tilt-based map-map and map-model FSC analyses at thresholds of FSC=0.5 and 0.143, respectively.

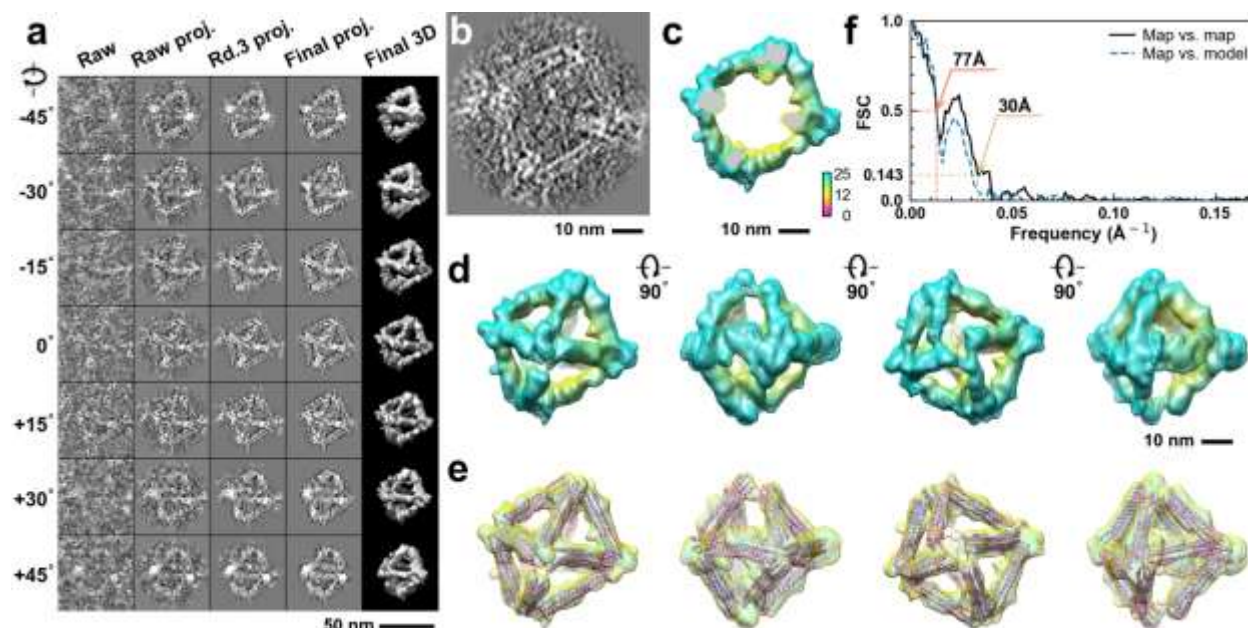

**Supplementary Fig. 265: IPET 3D reconstruction and model fitting of an individual unit-cell particle (Index: 257) within a 2D lattice with 0% ferritin loading.** **a**, Seven representative tilt images of a single unit-cell particle are shown in the first column (from left). The tilt images are aligned to a common center using IPET through iterative refinement. The projections of the raw, intermediate, and final 3D reconstruction at the corresponding angles are displayed in the subsequent four columns. **b**, A central cross-section (~23 nm thick) of the final reconstruction before masking is applied. **c**, 3D views of the central cross-section. **d**, Final 3D density map of this particle, viewed from four perpendicular directions. **e**, Final 3D reconstruction superimposed with the fitted model, viewed from four perpendicular directions. **f**, FSC analyses of the final map resolution using two methods: map-map FSC, where each map is reconstructed from one half of the images (even vs. odd tilt angle indices), and map-model FSC, where the model map is generated from the fitted model. Resolution assessments are provided based on tilt-based map-map and map-model FSC analyses at thresholds of FSC=0.5 and 0.143, respectively.



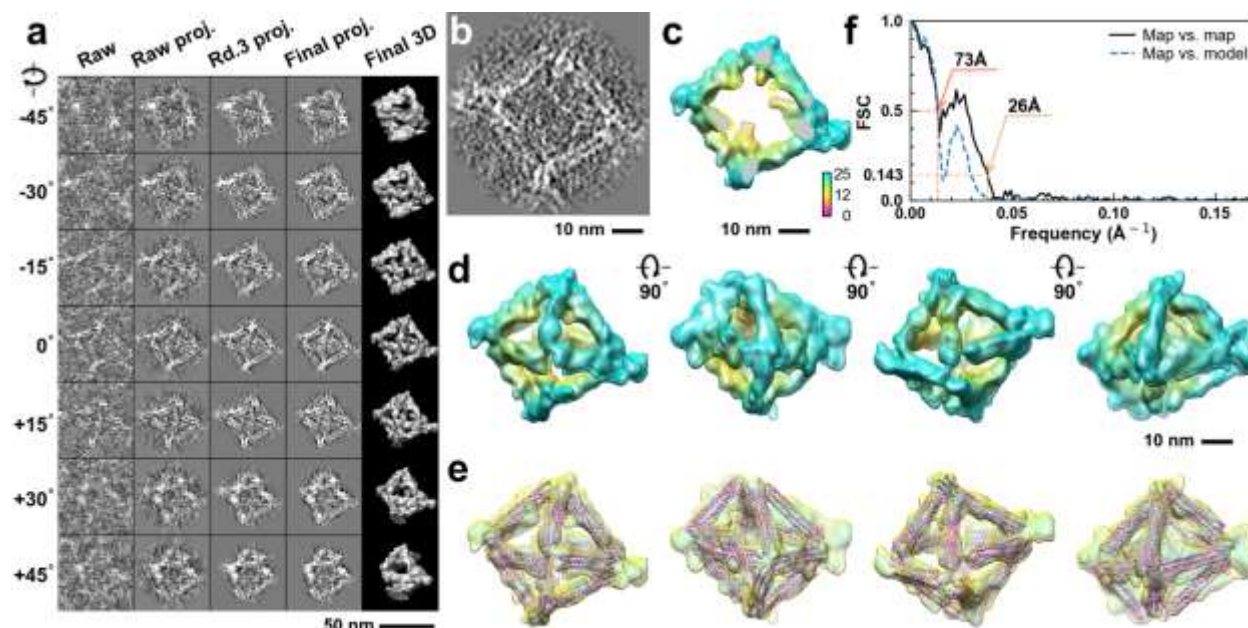

**Supplementary Fig. 266: IPET 3D reconstruction and model fitting of an individual unit-cell particle (Index: 258) within a 2D lattice with 0% ferritin loading.** **a**, Seven representative tilt images of a single unit-cell particle are shown in the first column (from left). The tilt images are aligned to a common center using IPET through iterative refinement. The projections of the raw, intermediate, and final 3D reconstruction at the corresponding angles are displayed in the subsequent four columns. **b**, A central cross-section (~23 nm thick) of the final reconstruction before masking is applied. **c**, 3D views of the central cross-section. **d**, Final 3D density map of this particle, viewed from four perpendicular directions. **e**, Final 3D reconstruction superimposed with the fitted model, viewed from four perpendicular directions. **f**, FSC analyses of the final map resolution using two methods: map-map FSC, where each map is reconstructed from one half of the images (even vs. odd tilt angle indices), and map-model FSC, where the model map is generated from the fitted model. Resolution assessments are provided based on tilt-based map-map and map-model FSC analyses at thresholds of FSC=0.5 and 0.143, respectively.

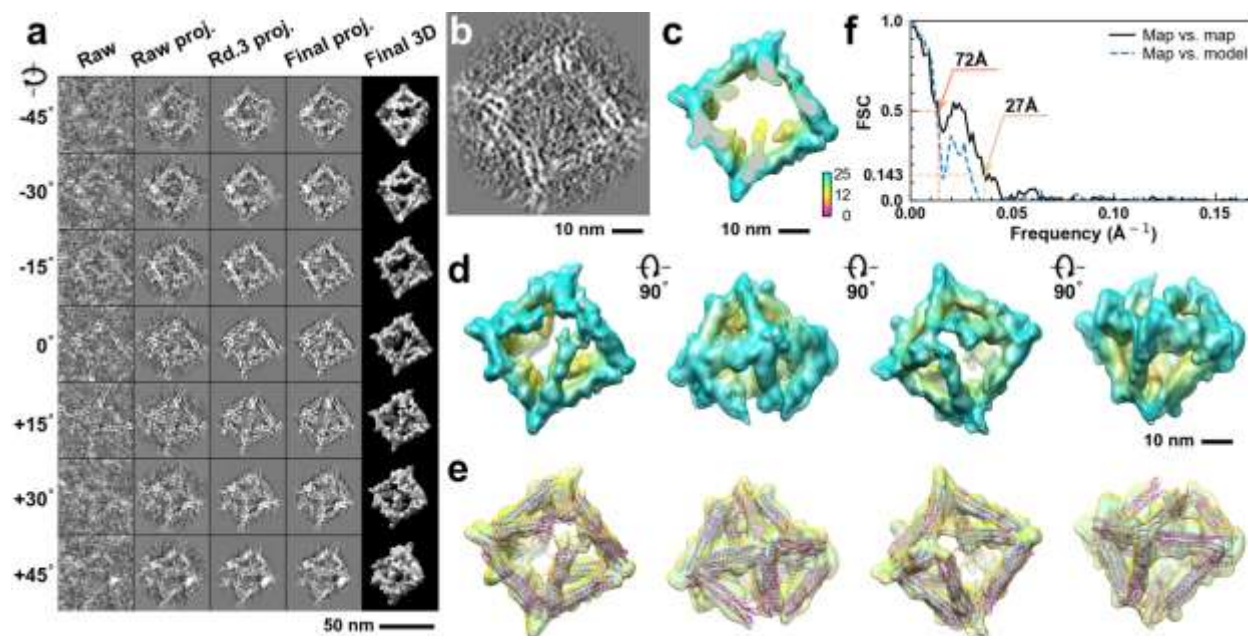

**Supplementary Fig. 267: IPET 3D reconstruction and model fitting of an individual unit-cell particle (Index: 259) within a 2D lattice with 0% ferritin loading.** **a**, Seven representative tilt images of a single unit-cell particle are shown in the first column (from left). The tilt images are aligned to a common center using IPET through iterative refinement. The projections of the raw, intermediate, and final 3D reconstruction at the corresponding angles are displayed in the subsequent four columns. **b**, A central cross-section (~23 nm thick) of the final reconstruction before masking is applied. **c**, 3D views of the central cross-section. **d**, Final 3D density map of this particle, viewed from four perpendicular directions. **e**, Final 3D reconstruction superimposed with the fitted model, viewed from four perpendicular directions. **f**, FSC analyses of the final map resolution using two methods: map-map FSC, where each map is reconstructed from one half of the images (even vs. odd tilt angle indices), and map-model FSC, where the model map is generated from the fitted model. Resolution assessments are provided based on tilt-based map-map and map-model FSC analyses at thresholds of FSC=0.5 and 0.143, respectively.

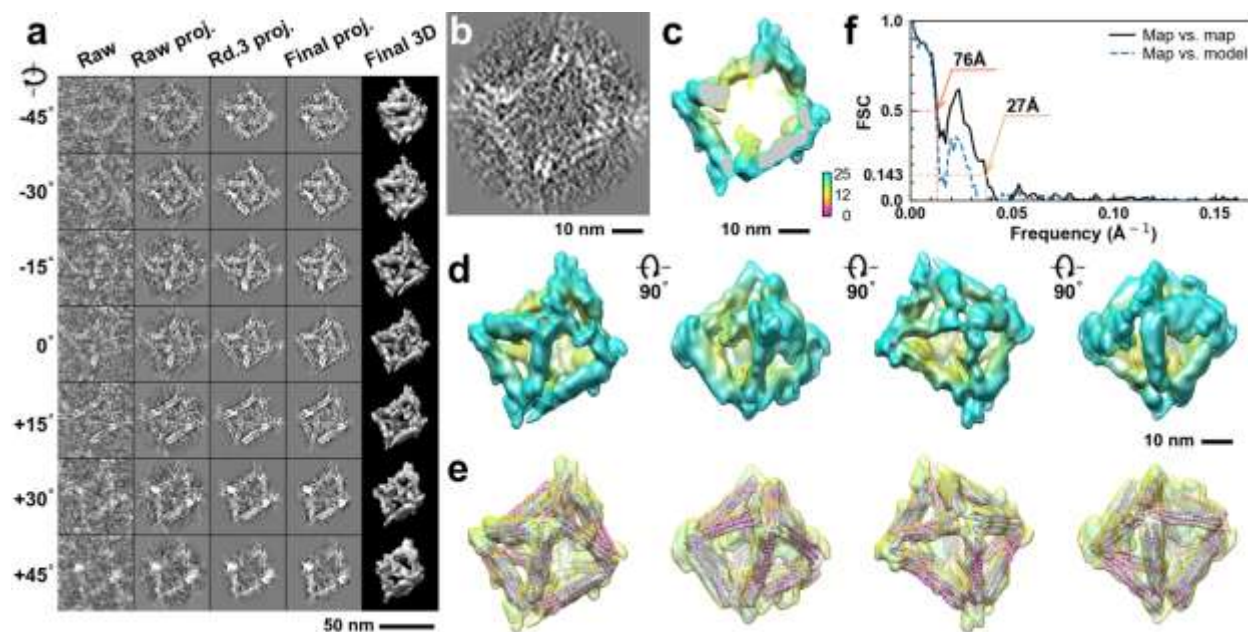

**Supplementary Fig. 268: IPET 3D reconstruction and model fitting of an individual unit-cell particle (Index: 260) within a 2D lattice with 0% ferritin loading.** **a**, Seven representative tilt images of a single unit-cell particle are shown in the first column (from left). The tilt images are aligned to a common center using IPET through iterative refinement. The projections of the raw, intermediate, and final 3D reconstruction at the corresponding angles are displayed in the subsequent four columns. **b**, A central cross-section (~23 nm thick) of the final reconstruction before masking is applied. **c**, 3D views of the central cross-section. **d**, Final 3D density map of this particle, viewed from four perpendicular directions. **e**, Final 3D reconstruction superimposed with the fitted model, viewed from four perpendicular directions. **f**, FSC analyses of the final map resolution using two methods: map-map FSC, where each map is reconstructed from one half of the images (even vs. odd tilt angle indices), and map-model FSC, where the model map is generated from the fitted model. Resolution assessments are provided based on tilt-based map-map and map-model FSC analyses at thresholds of FSC=0.5 and 0.143, respectively.

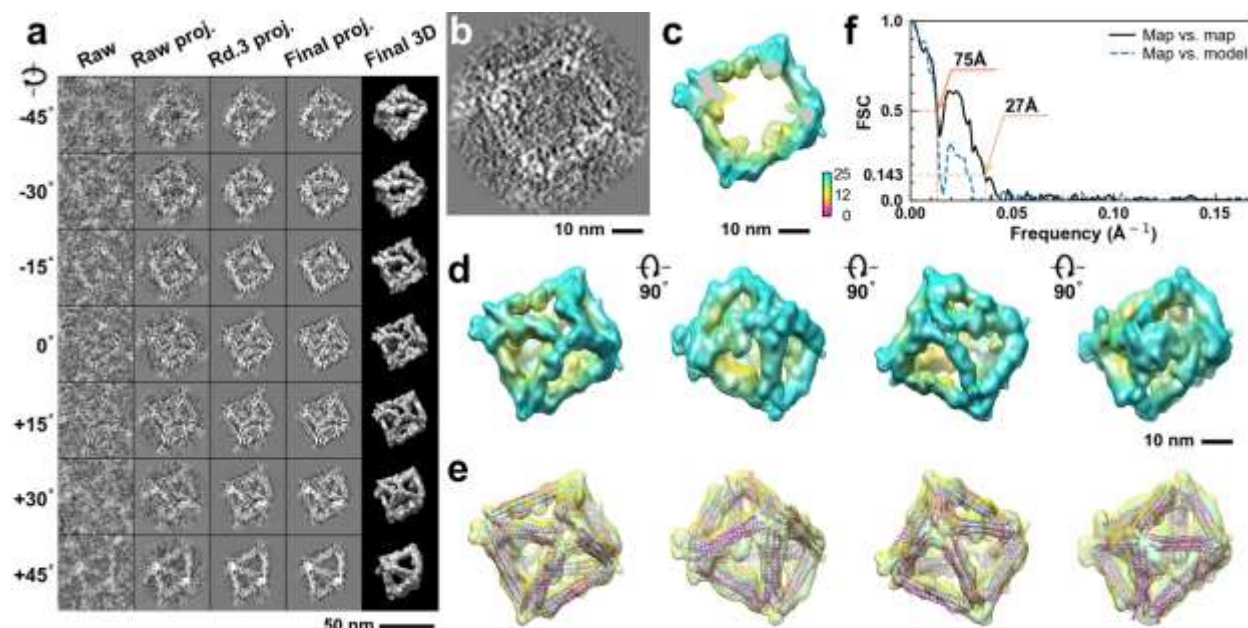

**Supplementary Fig. 269: IPET 3D reconstruction and model fitting of an individual unit-cell particle (Index: 261) within a 2D lattice with 0% ferritin loading.** **a**, Seven representative tilt images of a single unit-cell particle are shown in the first column (from left). The tilt images are aligned to a common center using IPET through iterative refinement. The projections of the raw, intermediate, and final 3D reconstruction at the corresponding angles are displayed in the subsequent four columns. **b**, A central cross-section (~23 nm thick) of the final reconstruction before masking is applied. **c**, 3D views of the central cross-section. **d**, Final 3D density map of this particle, viewed from four perpendicular directions. **e**, Final 3D reconstruction superimposed with the fitted model, viewed from four perpendicular directions. **f**, FSC analyses of the final map resolution using two methods: map-map FSC, where each map is reconstructed from one half of the images (even vs. odd tilt angle indices), and map-model FSC, where the model map is generated from the fitted model. Resolution assessments are provided based on tilt-based map-map and map-model FSC analyses at thresholds of FSC=0.5 and 0.143, respectively.



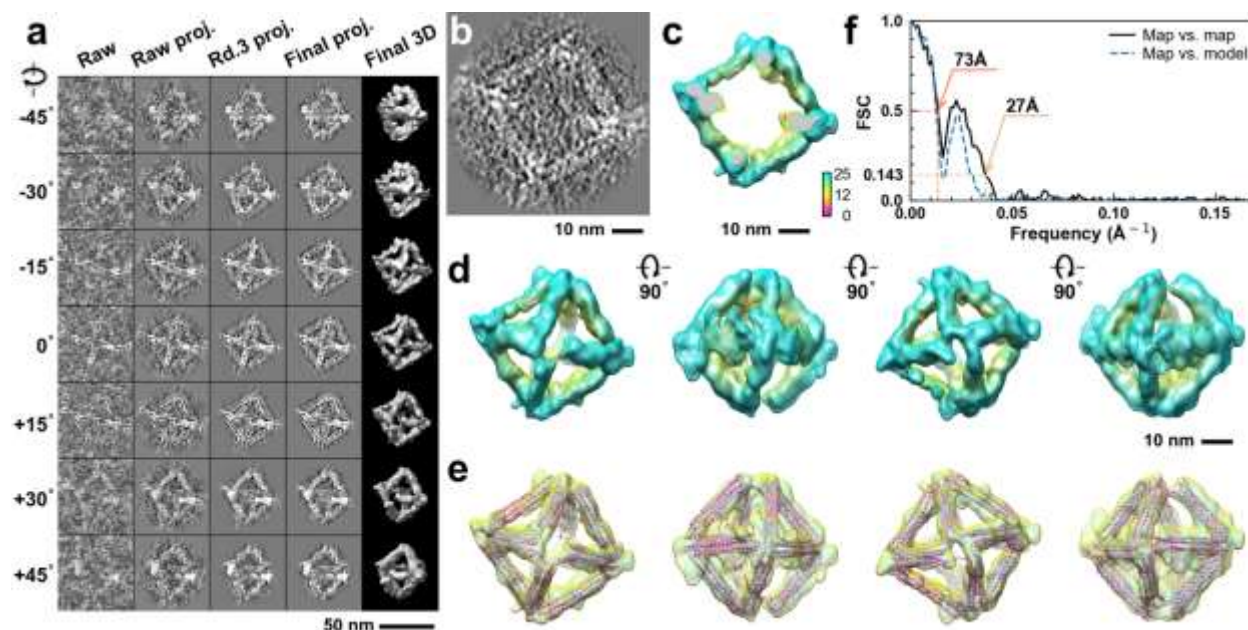

**Supplementary Fig. 270: IPET 3D reconstruction and model fitting of an individual unit-cell particle (Index: 262) within a 2D lattice with 0% ferritin loading.** **a**, Seven representative tilt images of a single unit-cell particle are shown in the first column (from left). The tilt images are aligned to a common center using IPET through iterative refinement. The projections of the raw, intermediate, and final 3D reconstruction at the corresponding angles are displayed in the subsequent four columns. **b**, A central cross-section (~23 nm thick) of the final reconstruction before masking is applied. **c**, 3D views of the central cross-section. **d**, Final 3D density map of this particle, viewed from four perpendicular directions. **e**, Final 3D reconstruction superimposed with the fitted model, viewed from four perpendicular directions. **f**, FSC analyses of the final map resolution using two methods: map-map FSC, where each map is reconstructed from one half of the images (even vs. odd tilt angle indices), and map-model FSC, where the model map is generated from the fitted model. Resolution assessments are provided based on tilt-based map-map and map-model FSC analyses at thresholds of FSC=0.5 and 0.143, respectively.

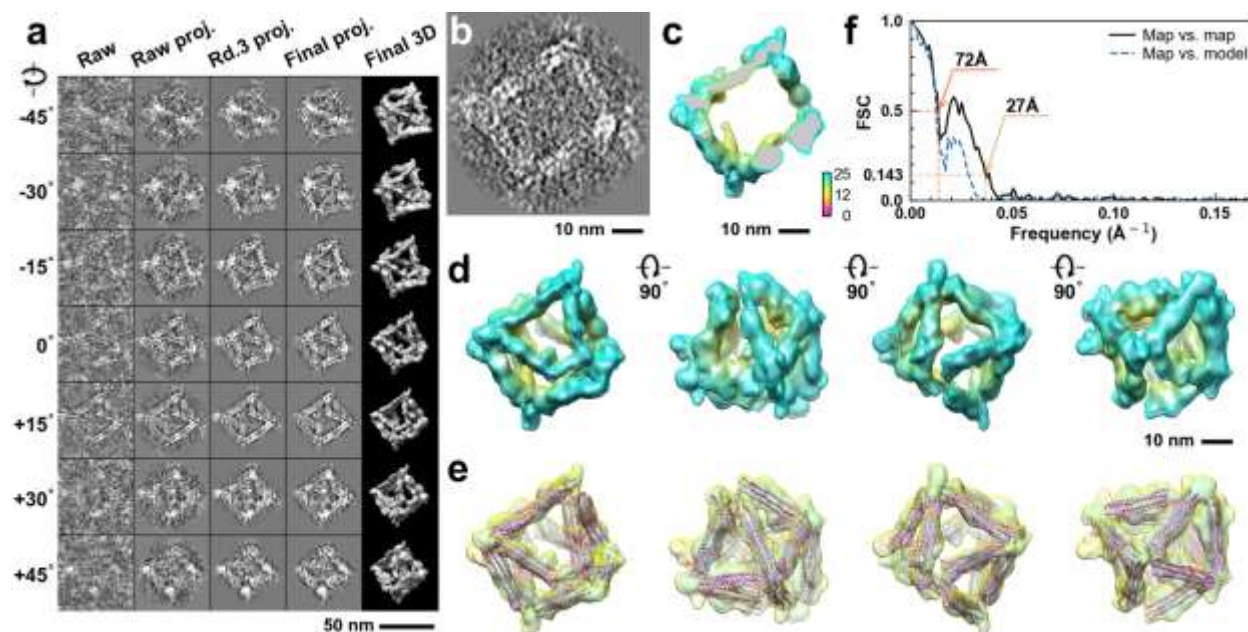

**Supplementary Fig. 271: IPET 3D reconstruction and model fitting of an individual unit-cell particle (Index: 263) within a 2D lattice with 0% ferritin loading.** **a**, Seven representative tilt images of a single unit-cell particle are shown in the first column (from left). The tilt images are aligned to a common center using IPET through iterative refinement. The projections of the raw, intermediate, and final 3D reconstruction at the corresponding angles are displayed in the subsequent four columns. **b**, A central cross-section (~23 nm thick) of the final reconstruction before masking is applied. **c**, 3D views of the central cross-section. **d**, Final 3D density map of this particle, viewed from four perpendicular directions. **e**, Final 3D reconstruction superimposed with the fitted model, viewed from four perpendicular directions. **f**, FSC analyses of the final map resolution using two methods: map-map FSC, where each map is reconstructed from one half of the images (even vs. odd tilt angle indices), and map-model FSC, where the model map is generated from the fitted model. Resolution assessments are provided based on tilt-based map-map and map-model FSC analyses at thresholds of FSC=0.5 and 0.143, respectively.

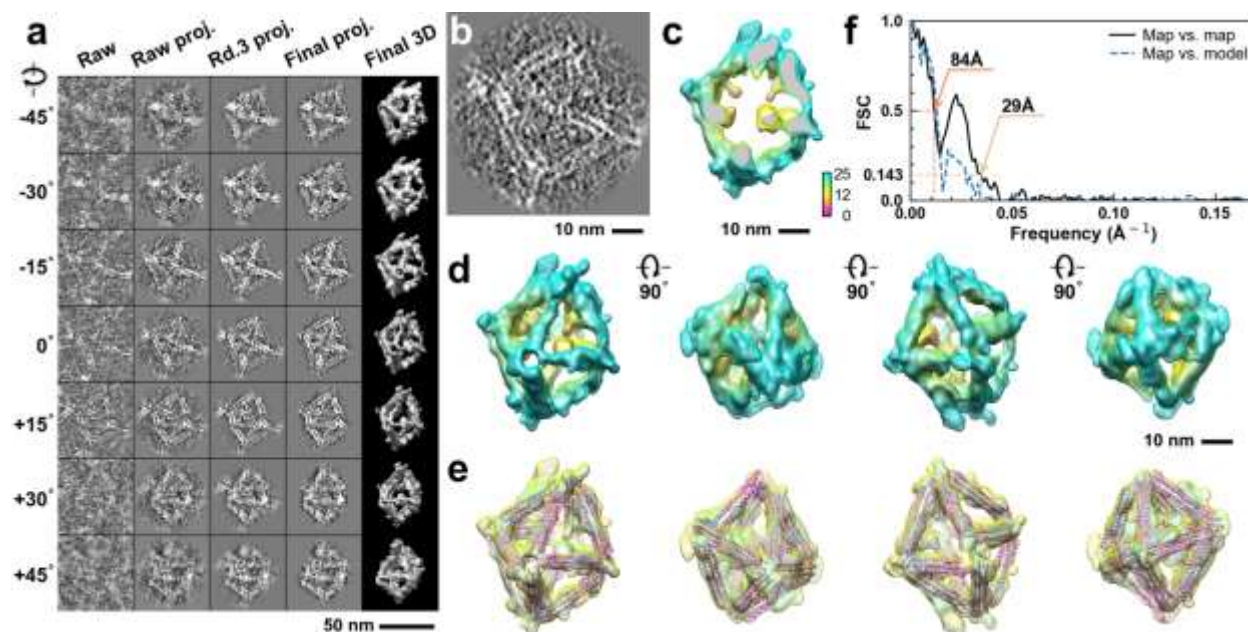

**Supplementary Fig. 272: IPET 3D reconstruction and model fitting of an individual unit-cell particle (Index: 264) within a 2D lattice with 0% ferritin loading.** **a**, Seven representative tilt images of a single unit-cell particle are shown in the first column (from left). The tilt images are aligned to a common center using IPET through iterative refinement. The projections of the raw, intermediate, and final 3D reconstruction at the corresponding angles are displayed in the subsequent four columns. **b**, A central cross-section (~23 nm thick) of the final reconstruction before masking is applied. **c**, 3D views of the central cross-section. **d**, Final 3D density map of this particle, viewed from four perpendicular directions. **e**, Final 3D reconstruction superimposed with the fitted model, viewed from four perpendicular directions. **f**, FSC analyses of the final map resolution using two methods: map-map FSC, where each map is reconstructed from one half of the images (even vs. odd tilt angle indices), and map-model FSC, where the model map is generated from the fitted model. Resolution assessments are provided based on tilt-based map-map and map-model FSC analyses at thresholds of FSC=0.5 and 0.143, respectively.

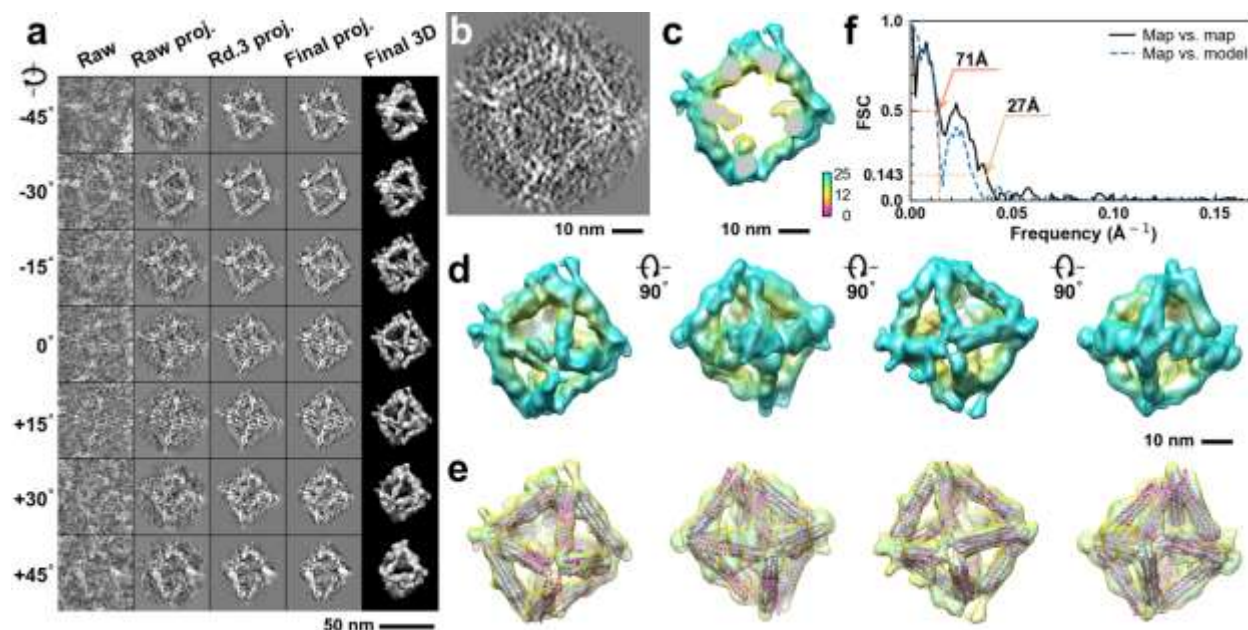

**Supplementary Fig. 273: IPET 3D reconstruction and model fitting of an individual unit-cell particle (Index: 265) within a 2D lattice with 0% ferritin loading.** **a**, Seven representative tilt images of a single unit-cell particle are shown in the first column (from left). The tilt images are aligned to a common center using IPET through iterative refinement. The projections of the raw, intermediate, and final 3D reconstruction at the corresponding angles are displayed in the subsequent four columns. **b**, A central cross-section (~23 nm thick) of the final reconstruction before masking is applied. **c**, 3D views of the central cross-section. **d**, Final 3D density map of this particle, viewed from four perpendicular directions. **e**, Final 3D reconstruction superimposed with the fitted model, viewed from four perpendicular directions. **f**, FSC analyses of the final map resolution using two methods: map-map FSC, where each map is reconstructed from one half of the images (even vs. odd tilt angle indices), and map-model FSC, where the model map is generated from the fitted model. Resolution assessments are provided based on tilt-based map-map and map-model FSC analyses at thresholds of FSC=0.5 and 0.143, respectively.



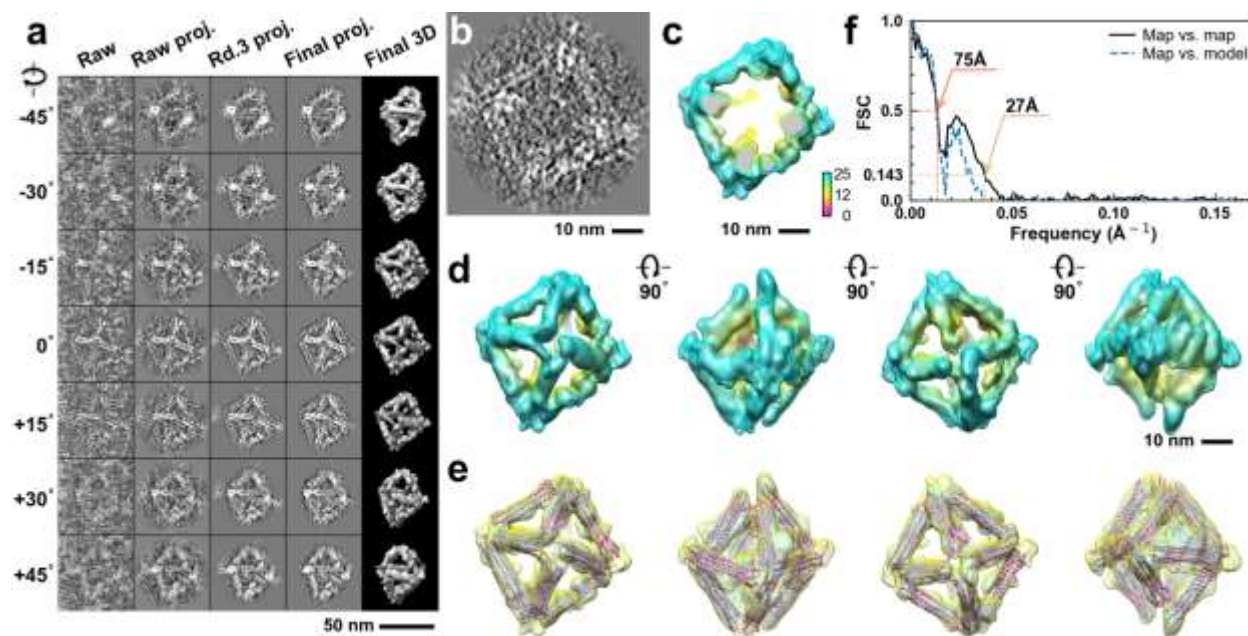

**Supplementary Fig. 274: IPET 3D reconstruction and model fitting of an individual unit-cell particle (Index: 266) within a 2D lattice with 0% ferritin loading.** **a**, Seven representative tilt images of a single unit-cell particle are shown in the first column (from left). The tilt images are aligned to a common center using IPET through iterative refinement. The projections of the raw, intermediate, and final 3D reconstruction at the corresponding angles are displayed in the subsequent four columns. **b**, A central cross-section (~23 nm thick) of the final reconstruction before masking is applied. **c**, 3D views of the central cross-section. **d**, Final 3D density map of this particle, viewed from four perpendicular directions. **e**, Final 3D reconstruction superimposed with the fitted model, viewed from four perpendicular directions. **f**, FSC analyses of the final map resolution using two methods: map-map FSC, where each map is reconstructed from one half of the images (even vs. odd tilt angle indices), and map-model FSC, where the model map is generated from the fitted model. Resolution assessments are provided based on tilt-based map-map and map-model FSC analyses at thresholds of FSC=0.5 and 0.143, respectively.

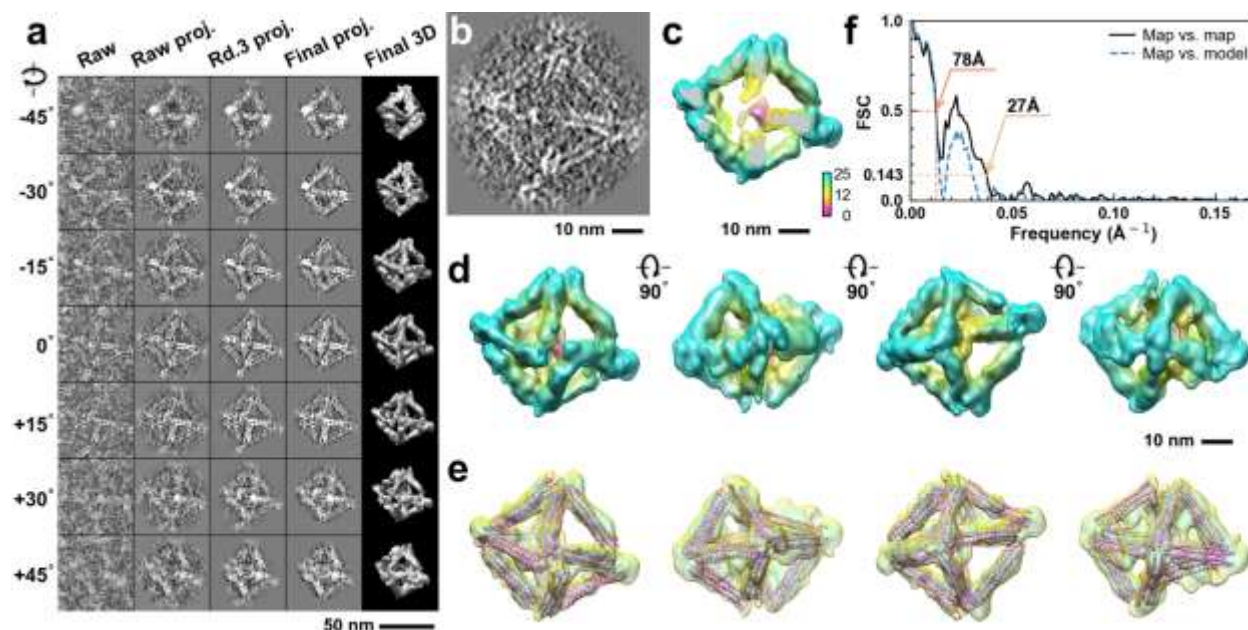

**Supplementary Fig. 275: IPET 3D reconstruction and model fitting of an individual unit-cell particle (Index: 267) within a 2D lattice with 0% ferritin loading.** **a**, Seven representative tilt images of a single unit-cell particle are shown in the first column (from left). The tilt images are aligned to a common center using IPET through iterative refinement. The projections of the raw, intermediate, and final 3D reconstruction at the corresponding angles are displayed in the subsequent four columns. **b**, A central cross-section (~23 nm thick) of the final reconstruction before masking is applied. **c**, 3D views of the central cross-section. **d**, Final 3D density map of this particle, viewed from four perpendicular directions. **e**, Final 3D reconstruction superimposed with the fitted model, viewed from four perpendicular directions. **f**, FSC analyses of the final map resolution using two methods: map-map FSC, where each map is reconstructed from one half of the images (even vs. odd tilt angle indices), and map-model FSC, where the model map is generated from the fitted model. Resolution assessments are provided based on tilt-based map-map and map-model FSC analyses at thresholds of FSC=0.5 and 0.143, respectively.

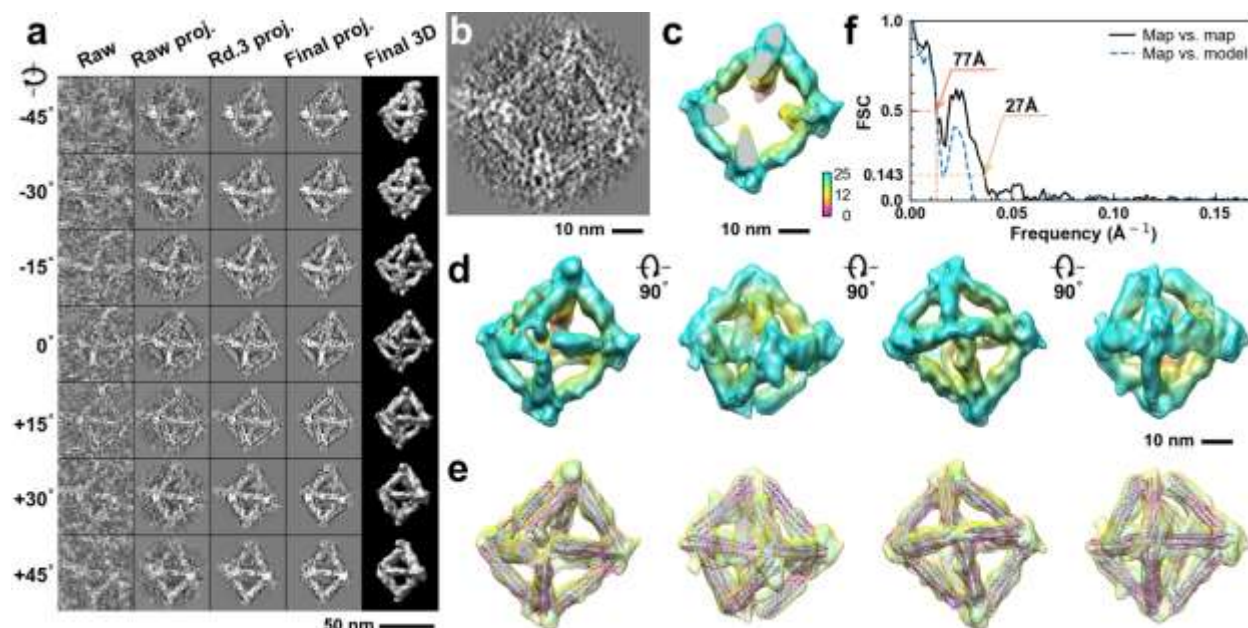

**Supplementary Fig. 276: IPET 3D reconstruction and model fitting of an individual unit-cell particle (Index: 268) within a 2D lattice with 0% ferritin loading.** **a**, Seven representative tilt images of a single unit-cell particle are shown in the first column (from left). The tilt images are aligned to a common center using IPET through iterative refinement. The projections of the raw, intermediate, and final 3D reconstruction at the corresponding angles are displayed in the subsequent four columns. **b**, A central cross-section (~23 nm thick) of the final reconstruction before masking is applied. **c**, 3D views of the central cross-section. **d**, Final 3D density map of this particle, viewed from four perpendicular directions. **e**, Final 3D reconstruction superimposed with the fitted model, viewed from four perpendicular directions. **f**, FSC analyses of the final map resolution using two methods: map-map FSC, where each map is reconstructed from one half of the images (even vs. odd tilt angle indices), and map-model FSC, where the model map is generated from the fitted model. Resolution assessments are provided based on tilt-based map-map and map-model FSC analyses at thresholds of FSC=0.5 and 0.143, respectively.

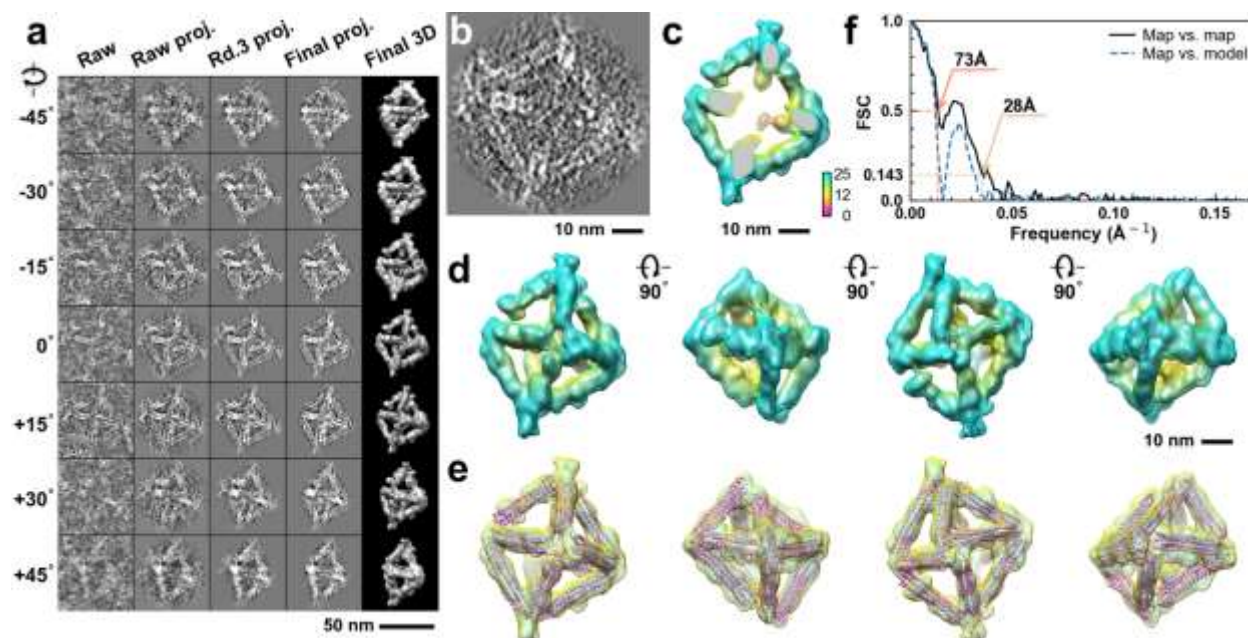

**Supplementary Fig. 277: IPET 3D reconstruction and model fitting of an individual unit-cell particle (Index: 269) within a 2D lattice with 0% ferritin loading.** **a**, Seven representative tilt images of a single unit-cell particle are shown in the first column (from left). The tilt images are aligned to a common center using IPET through iterative refinement. The projections of the raw, intermediate, and final 3D reconstruction at the corresponding angles are displayed in the subsequent four columns. **b**, A central cross-section (~23 nm thick) of the final reconstruction before masking is applied. **c**, 3D views of the central cross-section. **d**, Final 3D density map of this particle, viewed from four perpendicular directions. **e**, Final 3D reconstruction superimposed with the fitted model, viewed from four perpendicular directions. **f**, FSC analyses of the final map resolution using two methods: map-map FSC, where each map is reconstructed from one half of the images (even vs. odd tilt angle indices), and map-model FSC, where the model map is generated from the fitted model. Resolution assessments are provided based on tilt-based map-map and map-model FSC analyses at thresholds of FSC=0.5 and 0.143, respectively.



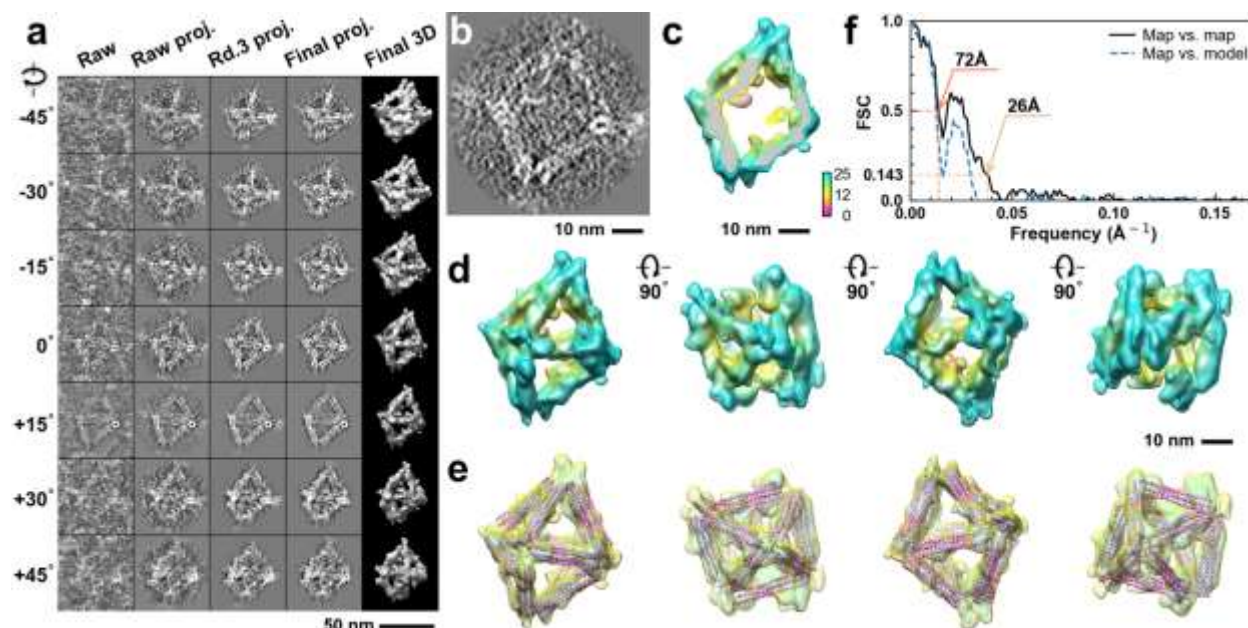

**Supplementary Fig. 278: IPET 3D reconstruction and model fitting of an individual unit-cell particle (Index: 270) within a 2D lattice with 0% ferritin loading.** **a**, Seven representative tilt images of a single unit-cell particle are shown in the first column (from left). The tilt images are aligned to a common center using IPET through iterative refinement. The projections of the raw, intermediate, and final 3D reconstruction at the corresponding angles are displayed in the subsequent four columns. **b**, A central cross-section (~23 nm thick) of the final reconstruction before masking is applied. **c**, 3D views of the central cross-section. **d**, Final 3D density map of this particle, viewed from four perpendicular directions. **e**, Final 3D reconstruction superimposed with the fitted model, viewed from four perpendicular directions. **f**, FSC analyses of the final map resolution using two methods: map-map FSC, where each map is reconstructed from one half of the images (even vs. odd tilt angle indices), and map-model FSC, where the model map is generated from the fitted model. Resolution assessments are provided based on tilt-based map-map and map-model FSC analyses at thresholds of FSC=0.5 and 0.143, respectively.

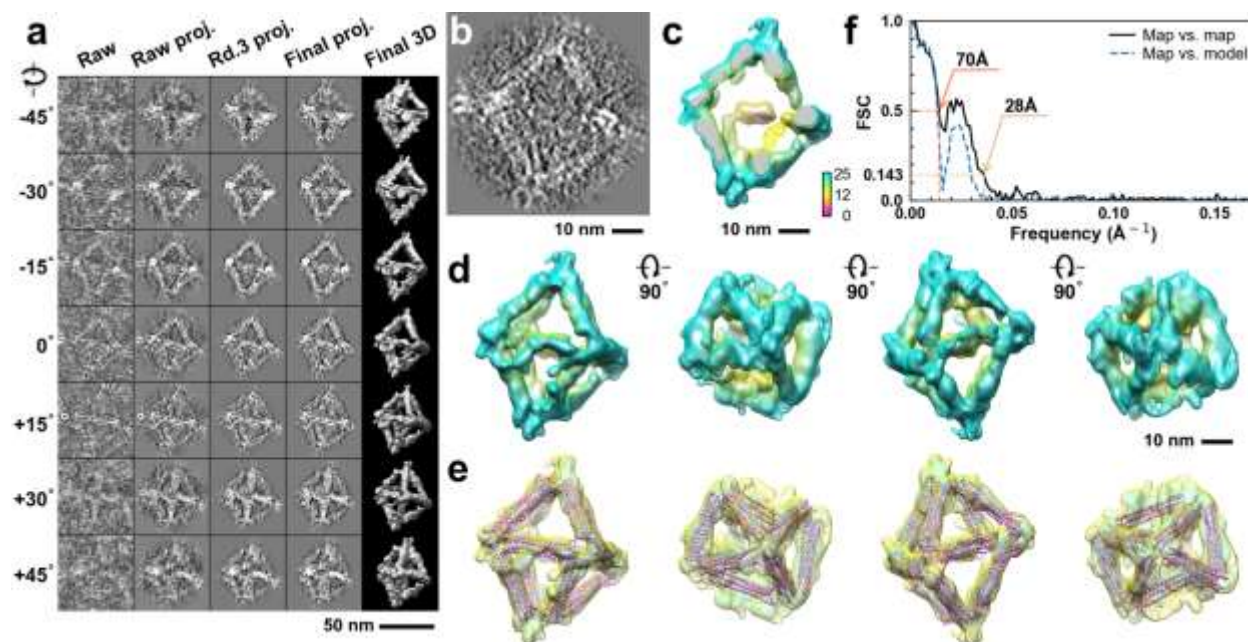

**Supplementary Fig. 279: IPET 3D reconstruction and model fitting of an individual unit-cell particle (Index: 271) within a 2D lattice with 0% ferritin loading.** **a**, Seven representative tilt images of a single unit-cell particle are shown in the first column (from left). The tilt images are aligned to a common center using IPET through iterative refinement. The projections of the raw, intermediate, and final 3D reconstruction at the corresponding angles are displayed in the subsequent four columns. **b**, A central cross-section (~23 nm thick) of the final reconstruction before masking is applied. **c**, 3D views of the central cross-section. **d**, Final 3D density map of this particle, viewed from four perpendicular directions. **e**, Final 3D reconstruction superimposed with the fitted model, viewed from four perpendicular directions. **f**, FSC analyses of the final map resolution using two methods: map-map FSC, where each map is reconstructed from one half of the images (even vs. odd tilt angle indices), and map-model FSC, where the model map is generated from the fitted model. Resolution assessments are provided based on tilt-based map-map and map-model FSC analyses at thresholds of FSC=0.5 and 0.143, respectively.

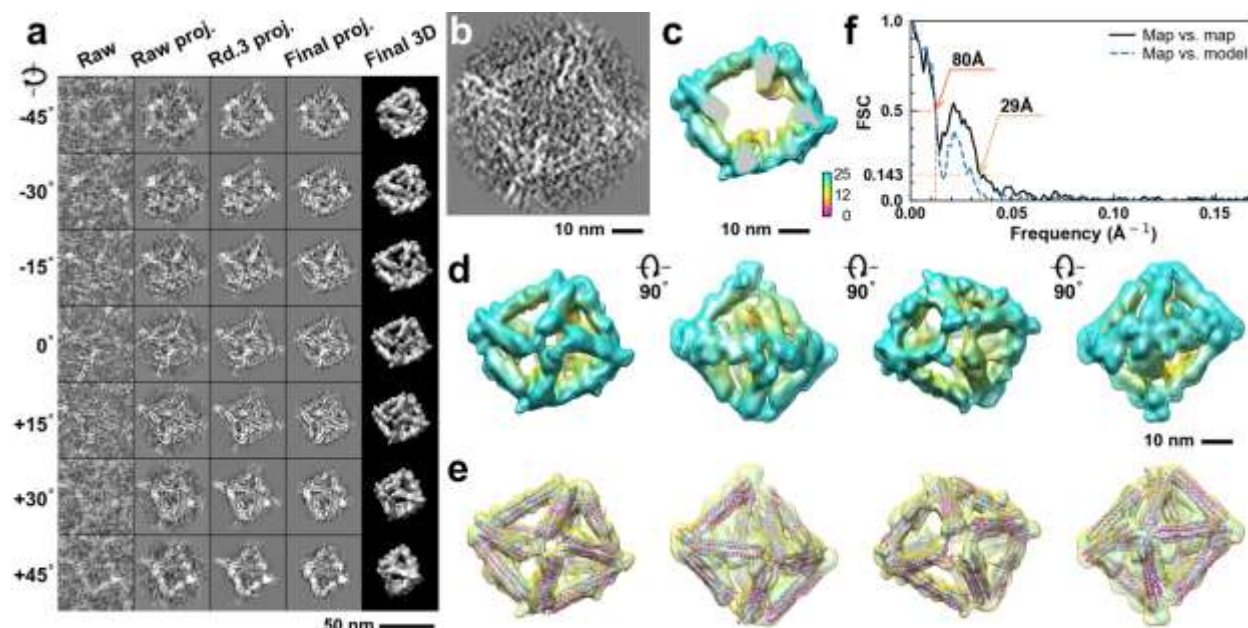

**Supplementary Fig. 280: IPET 3D reconstruction and model fitting of an individual unit-cell particle (Index: 272) within a 2D lattice with 0% ferritin loading.** **a**, Seven representative tilt images of a single unit-cell particle are shown in the first column (from left). The tilt images are aligned to a common center using IPET through iterative refinement. The projections of the raw, intermediate, and final 3D reconstruction at the corresponding angles are displayed in the subsequent four columns. **b**, A central cross-section (~23 nm thick) of the final reconstruction before masking is applied. **c**, 3D views of the central cross-section. **d**, Final 3D density map of this particle, viewed from four perpendicular directions. **e**, Final 3D reconstruction superimposed with the fitted model, viewed from four perpendicular directions. **f**, FSC analyses of the final map resolution using two methods: map-map FSC, where each map is reconstructed from one half of the images (even vs. odd tilt angle indices), and map-model FSC, where the model map is generated from the fitted model. Resolution assessments are provided based on tilt-based map-map and map-model FSC analyses at thresholds of FSC=0.5 and 0.143, respectively.

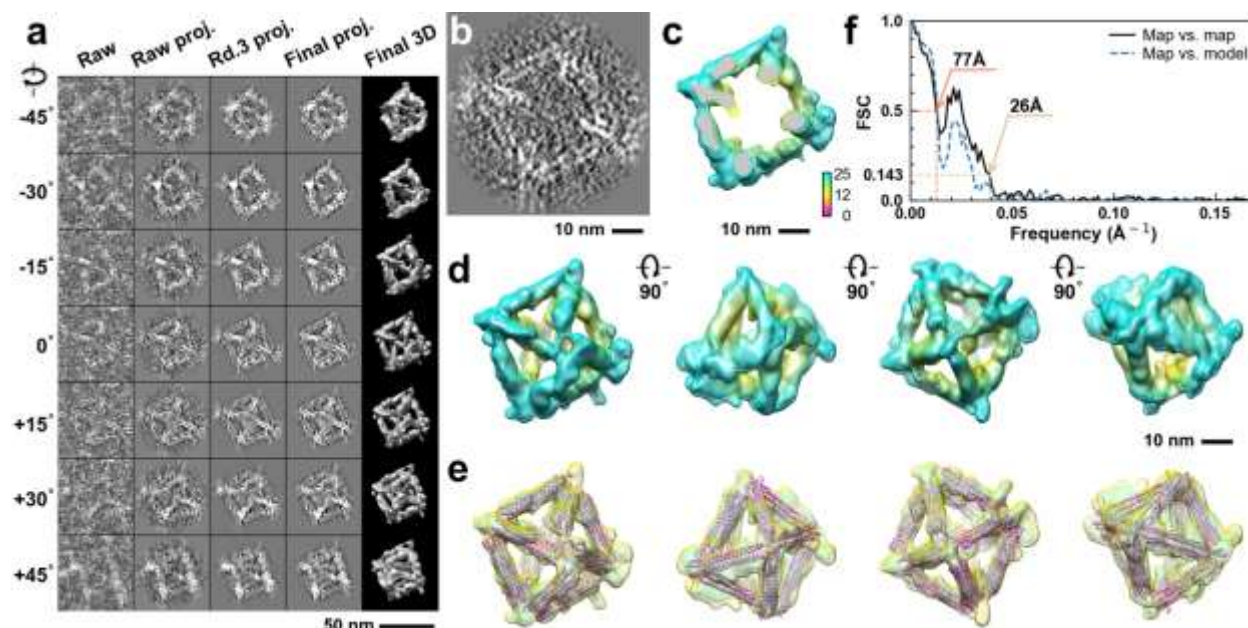

**Supplementary Fig. 281: IPET 3D reconstruction and model fitting of an individual unit-cell particle (Index: 273) within a 2D lattice with 0% ferritin loading.** **a**, Seven representative tilt images of a single unit-cell particle are shown in the first column (from left). The tilt images are aligned to a common center using IPET through iterative refinement. The projections of the raw, intermediate, and final 3D reconstruction at the corresponding angles are displayed in the subsequent four columns. **b**, A central cross-section (~23 nm thick) of the final reconstruction before masking is applied. **c**, 3D views of the central cross-section. **d**, Final 3D density map of this particle, viewed from four perpendicular directions. **e**, Final 3D reconstruction superimposed with the fitted model, viewed from four perpendicular directions. **f**, FSC analyses of the final map resolution using two methods: map-map FSC, where each map is reconstructed from one half of the images (even vs. odd tilt angle indices), and map-model FSC, where the model map is generated from the fitted model. Resolution assessments are provided based on tilt-based map-map and map-model FSC analyses at thresholds of FSC=0.5 and 0.143, respectively.



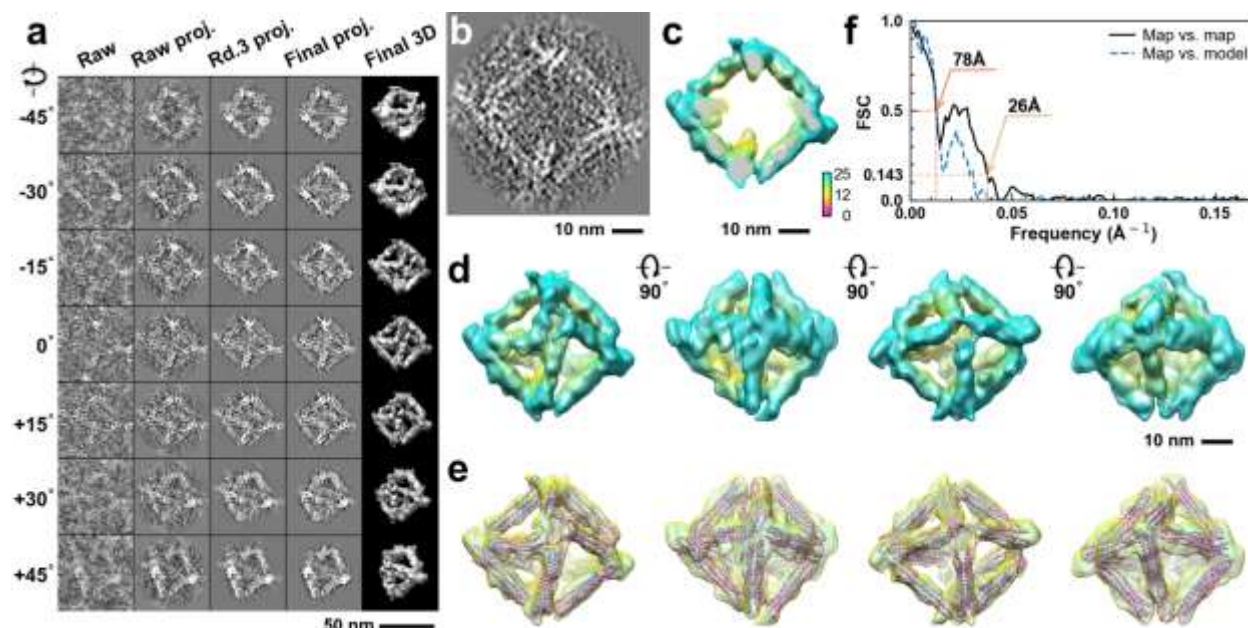

**Supplementary Fig. 282: IPET 3D reconstruction and model fitting of an individual unit-cell particle (Index: 274) within a 2D lattice with 0% ferritin loading.** **a**, Seven representative tilt images of a single unit-cell particle are shown in the first column (from left). The tilt images are aligned to a common center using IPET through iterative refinement. The projections of the raw, intermediate, and final 3D reconstruction at the corresponding angles are displayed in the subsequent four columns. **b**, A central cross-section (~23 nm thick) of the final reconstruction before masking is applied. **c**, 3D views of the central cross-section. **d**, Final 3D density map of this particle, viewed from four perpendicular directions. **e**, Final 3D reconstruction superimposed with the fitted model, viewed from four perpendicular directions. **f**, FSC analyses of the final map resolution using two methods: map-map FSC, where each map is reconstructed from one half of the images (even vs. odd tilt angle indices), and map-model FSC, where the model map is generated from the fitted model. Resolution assessments are provided based on tilt-based map-map and map-model FSC analyses at thresholds of FSC=0.5 and 0.143, respectively.

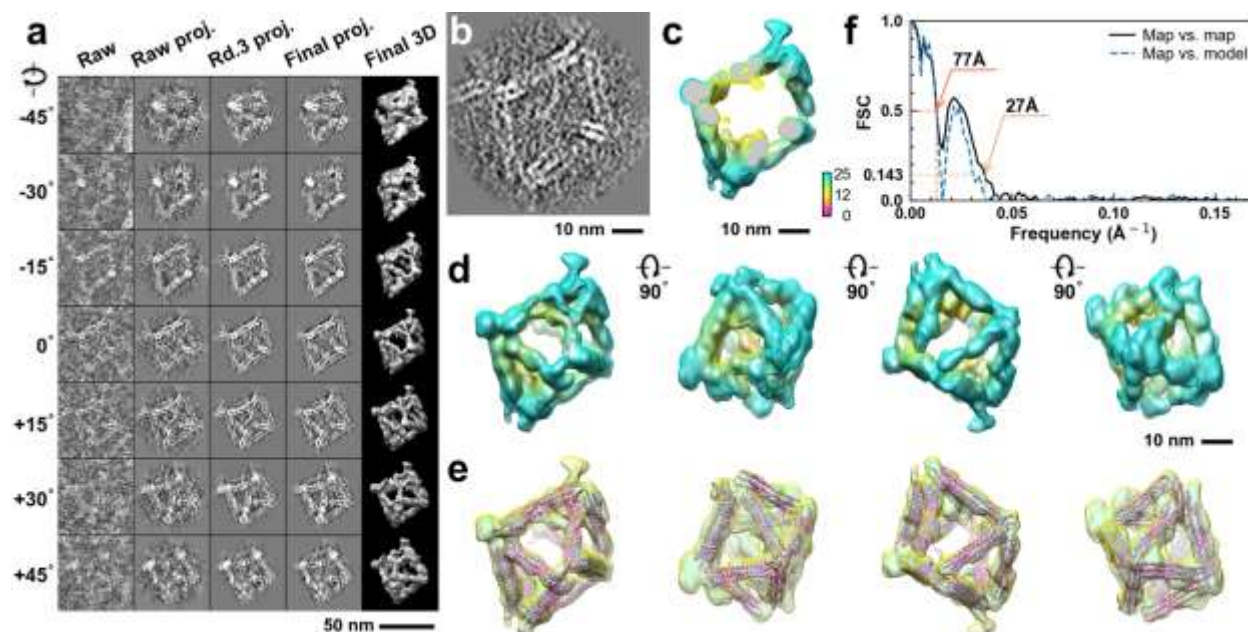

**Supplementary Fig. 283: IPET 3D reconstruction and model fitting of an individual unit-cell particle (Index: 275) within a 2D lattice with 0% ferritin loading.** **a**, Seven representative tilt images of a single unit-cell particle are shown in the first column (from left). The tilt images are aligned to a common center using IPET through iterative refinement. The projections of the raw, intermediate, and final 3D reconstruction at the corresponding angles are displayed in the subsequent four columns. **b**, A central cross-section (~23 nm thick) of the final reconstruction before masking is applied. **c**, 3D views of the central cross-section. **d**, Final 3D density map of this particle, viewed from four perpendicular directions. **e**, Final 3D reconstruction superimposed with the fitted model, viewed from four perpendicular directions. **f**, FSC analyses of the final map resolution using two methods: map-map FSC, where each map is reconstructed from one half of the images (even vs. odd tilt angle indices), and map-model FSC, where the model map is generated from the fitted model. Resolution assessments are provided based on tilt-based map-map and map-model FSC analyses at thresholds of FSC=0.5 and 0.143, respectively.

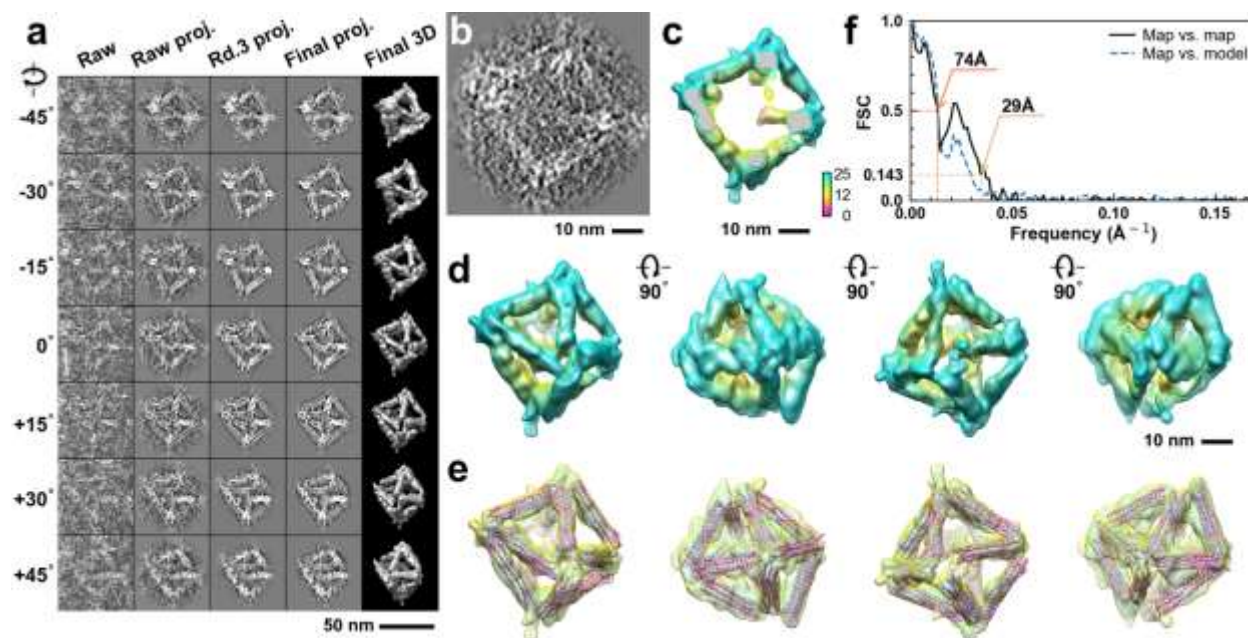

**Supplementary Fig. 284: IPET 3D reconstruction and model fitting of an individual unit-cell particle (Index: 276) within a 2D lattice with 0% ferritin loading.** **a**, Seven representative tilt images of a single unit-cell particle are shown in the first column (from left). The tilt images are aligned to a common center using IPET through iterative refinement. The projections of the raw, intermediate, and final 3D reconstruction at the corresponding angles are displayed in the subsequent four columns. **b**, A central cross-section (~23 nm thick) of the final reconstruction before masking is applied. **c**, 3D views of the central cross-section. **d**, Final 3D density map of this particle, viewed from four perpendicular directions. **e**, Final 3D reconstruction superimposed with the fitted model, viewed from four perpendicular directions. **f**, FSC analyses of the final map resolution using two methods: map-map FSC, where each map is reconstructed from one half of the images (even vs. odd tilt angle indices), and map-model FSC, where the model map is generated from the fitted model. Resolution assessments are provided based on tilt-based map-map and map-model FSC analyses at thresholds of FSC=0.5 and 0.143, respectively.

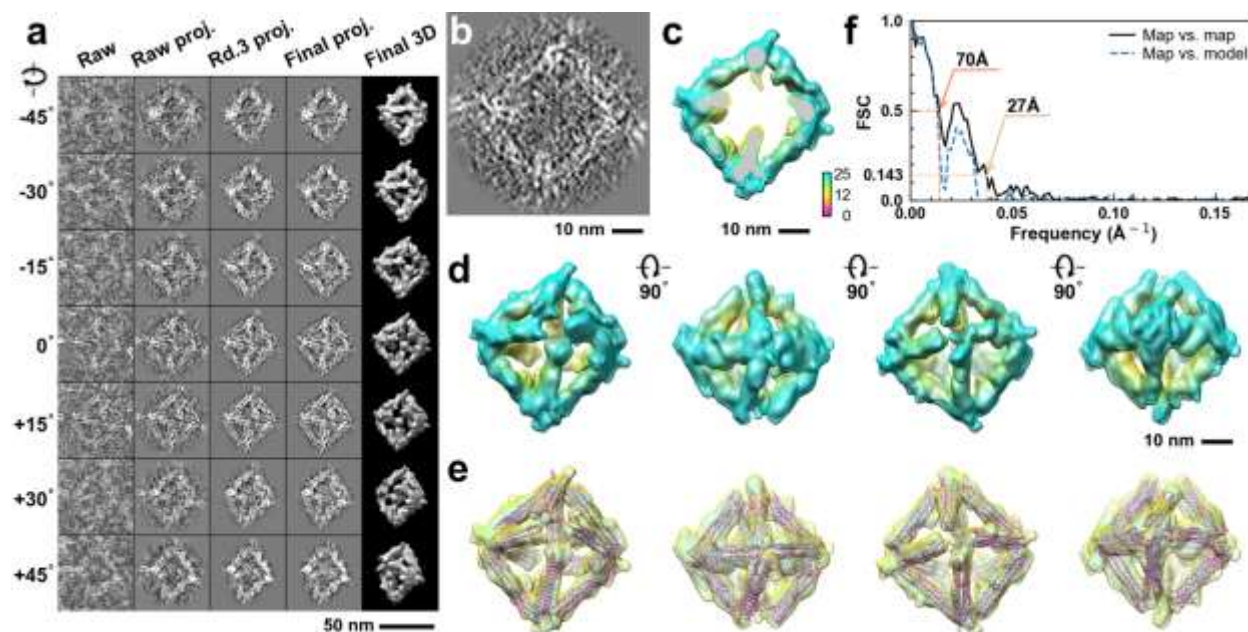

**Supplementary Fig. 285: IPET 3D reconstruction and model fitting of an individual unit-cell particle (Index: 277) within a 2D lattice with 0% ferritin loading.** **a**, Seven representative tilt images of a single unit-cell particle are shown in the first column (from left). The tilt images are aligned to a common center using IPET through iterative refinement. The projections of the raw, intermediate, and final 3D reconstruction at the corresponding angles are displayed in the subsequent four columns. **b**, A central cross-section (~23 nm thick) of the final reconstruction before masking is applied. **c**, 3D views of the central cross-section. **d**, Final 3D density map of this particle, viewed from four perpendicular directions. **e**, Final 3D reconstruction superimposed with the fitted model, viewed from four perpendicular directions. **f**, FSC analyses of the final map resolution using two methods: map-map FSC, where each map is reconstructed from one half of the images (even vs. odd tilt angle indices), and map-model FSC, where the model map is generated from the fitted model. Resolution assessments are provided based on tilt-based map-map and map-model FSC analyses at thresholds of FSC=0.5 and 0.143, respectively.



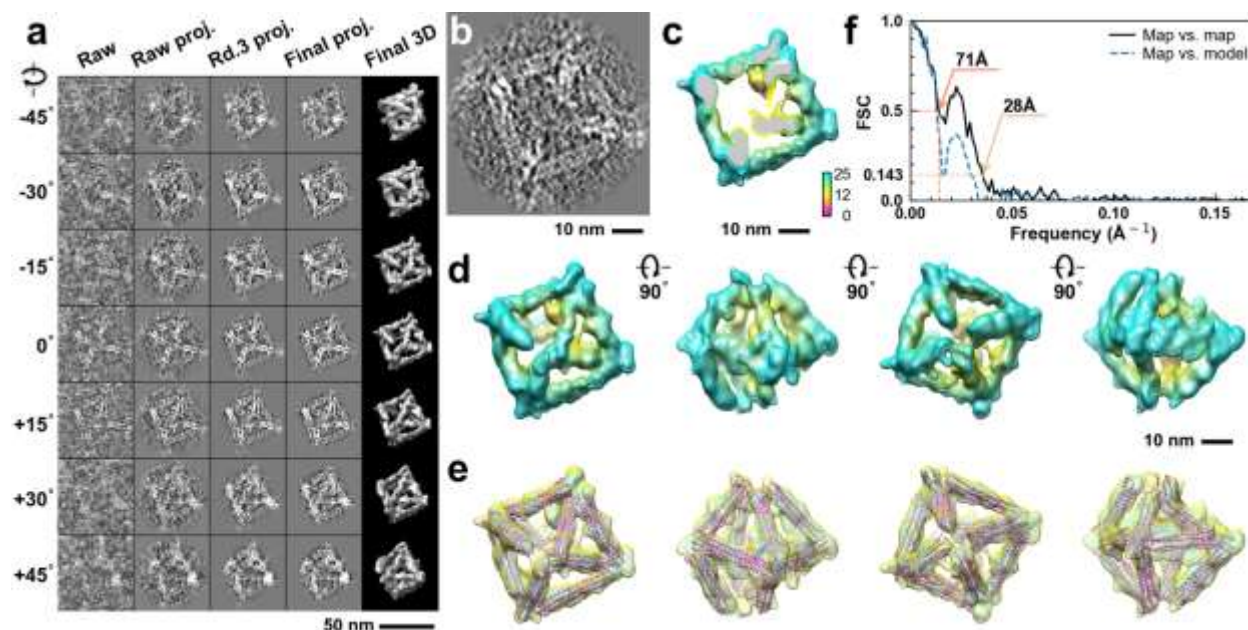

**Supplementary Fig. 286: IPET 3D reconstruction and model fitting of an individual unit-cell particle (Index: 278) within a 2D lattice with 0% ferritin loading.** **a**, Seven representative tilt images of a single unit-cell particle are shown in the first column (from left). The tilt images are aligned to a common center using IPET through iterative refinement. The projections of the raw, intermediate, and final 3D reconstruction at the corresponding angles are displayed in the subsequent four columns. **b**, A central cross-section (~23 nm thick) of the final reconstruction before masking is applied. **c**, 3D views of the central cross-section. **d**, Final 3D density map of this particle, viewed from four perpendicular directions. **e**, Final 3D reconstruction superimposed with the fitted model, viewed from four perpendicular directions. **f**, FSC analyses of the final map resolution using two methods: map-map FSC, where each map is reconstructed from one half of the images (even vs. odd tilt angle indices), and map-model FSC, where the model map is generated from the fitted model. Resolution assessments are provided based on tilt-based map-map and map-model FSC analyses at thresholds of FSC=0.5 and 0.143, respectively.

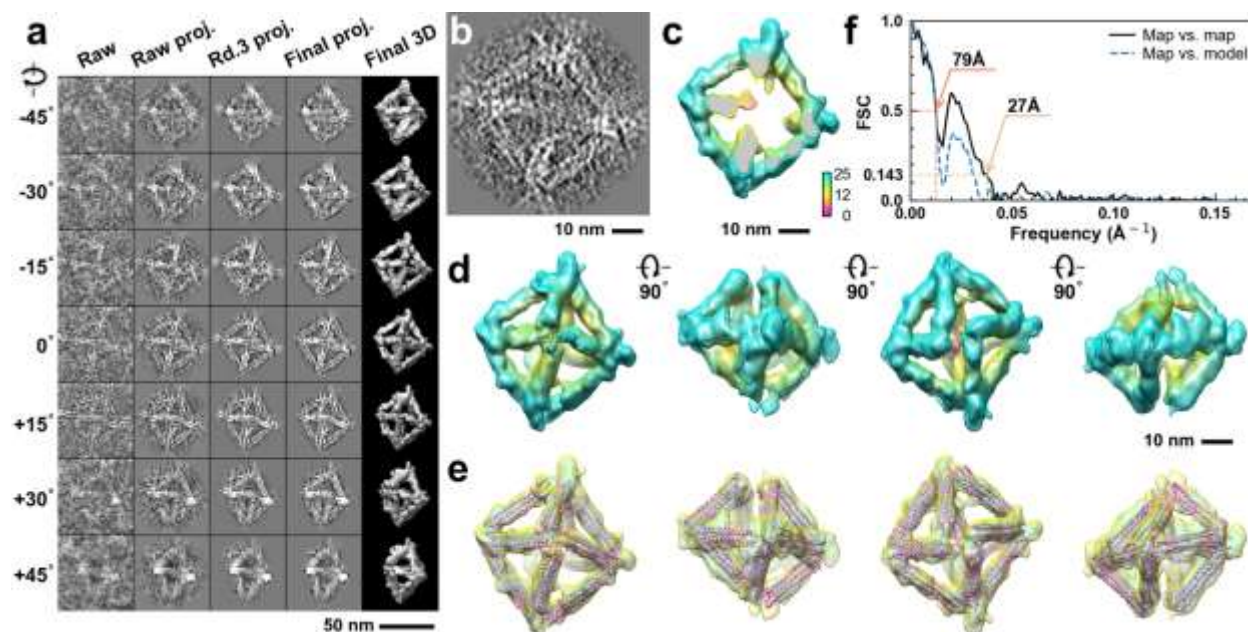

**Supplementary Fig. 287: IPET 3D reconstruction and model fitting of an individual unit-cell particle (Index: 279) within a 2D lattice with 0% ferritin loading.** **a**, Seven representative tilt images of a single unit-cell particle are shown in the first column (from left). The tilt images are aligned to a common center using IPET through iterative refinement. The projections of the raw, intermediate, and final 3D reconstruction at the corresponding angles are displayed in the subsequent four columns. **b**, A central cross-section (~23 nm thick) of the final reconstruction before masking is applied. **c**, 3D views of the central cross-section. **d**, Final 3D density map of this particle, viewed from four perpendicular directions. **e**, Final 3D reconstruction superimposed with the fitted model, viewed from four perpendicular directions. **f**, FSC analyses of the final map resolution using two methods: map-map FSC, where each map is reconstructed from one half of the images (even vs. odd tilt angle indices), and map-model FSC, where the model map is generated from the fitted model. Resolution assessments are provided based on tilt-based map-map and map-model FSC analyses at thresholds of FSC=0.5 and 0.143, respectively.

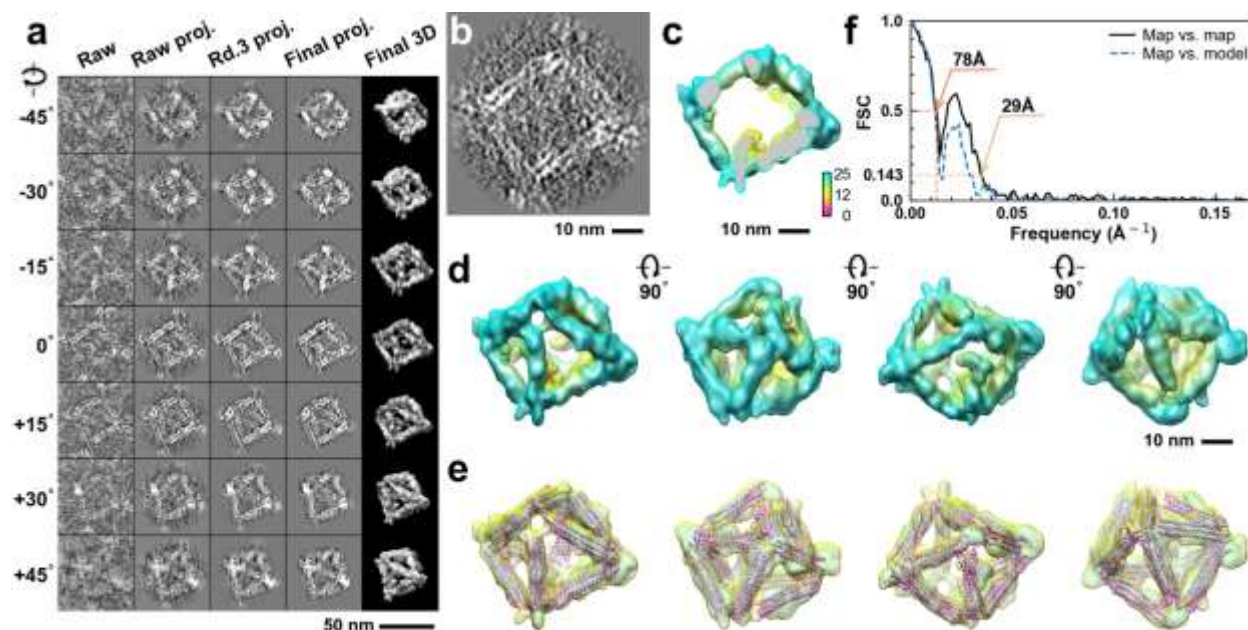

**Supplementary Fig. 288: IPET 3D reconstruction and model fitting of an individual unit-cell particle (Index: 280) within a 2D lattice with 0% ferritin loading.** **a**, Seven representative tilt images of a single unit-cell particle are shown in the first column (from left). The tilt images are aligned to a common center using IPET through iterative refinement. The projections of the raw, intermediate, and final 3D reconstruction at the corresponding angles are displayed in the subsequent four columns. **b**, A central cross-section (~23 nm thick) of the final reconstruction before masking is applied. **c**, 3D views of the central cross-section. **d**, Final 3D density map of this particle, viewed from four perpendicular directions. **e**, Final 3D reconstruction superimposed with the fitted model, viewed from four perpendicular directions. **f**, FSC analyses of the final map resolution using two methods: map-map FSC, where each map is reconstructed from one half of the images (even vs. odd tilt angle indices), and map-model FSC, where the model map is generated from the fitted model. Resolution assessments are provided based on tilt-based map-map and map-model FSC analyses at thresholds of FSC=0.5 and 0.143, respectively.

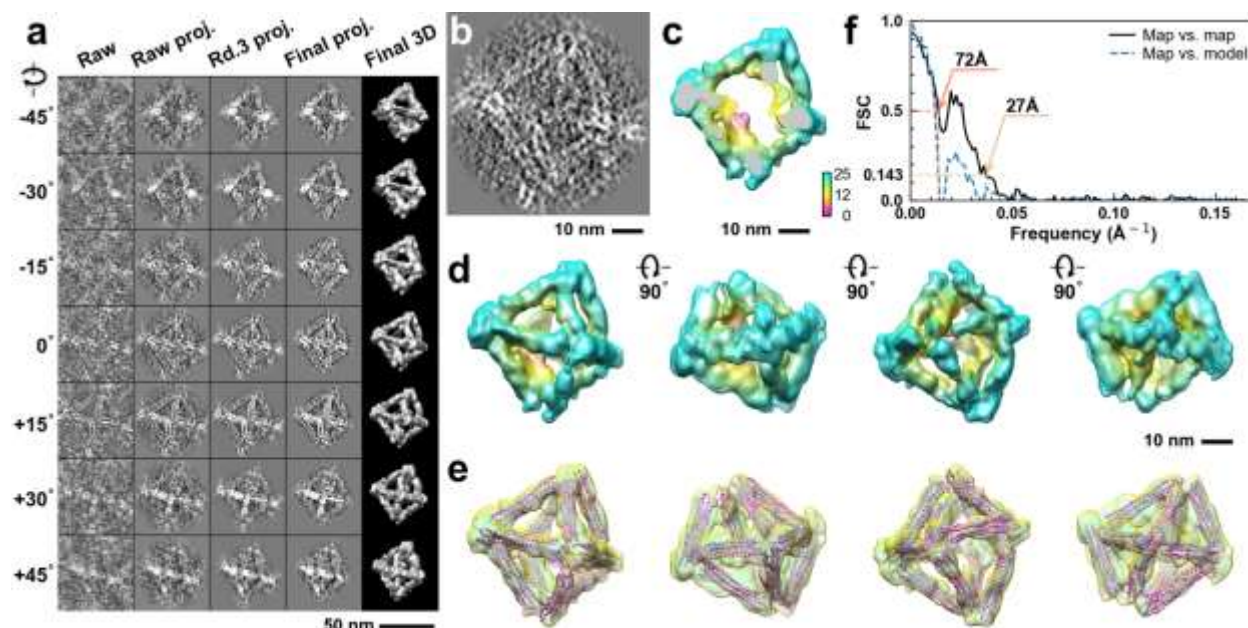

**Supplementary Fig. 289: IPET 3D reconstruction and model fitting of an individual unit-cell particle (Index: 281) within a 2D lattice with 0% ferritin loading.** **a**, Seven representative tilt images of a single unit-cell particle are shown in the first column (from left). The tilt images are aligned to a common center using IPET through iterative refinement. The projections of the raw, intermediate, and final 3D reconstruction at the corresponding angles are displayed in the subsequent four columns. **b**, A central cross-section (~23 nm thick) of the final reconstruction before masking is applied. **c**, 3D views of the central cross-section. **d**, Final 3D density map of this particle, viewed from four perpendicular directions. **e**, Final 3D reconstruction superimposed with the fitted model, viewed from four perpendicular directions. **f**, FSC analyses of the final map resolution using two methods: map-map FSC, where each map is reconstructed from one half of the images (even vs. odd tilt angle indices), and map-model FSC, where the model map is generated from the fitted model. Resolution assessments are provided based on tilt-based map-map and map-model FSC analyses at thresholds of FSC=0.5 and 0.143, respectively.



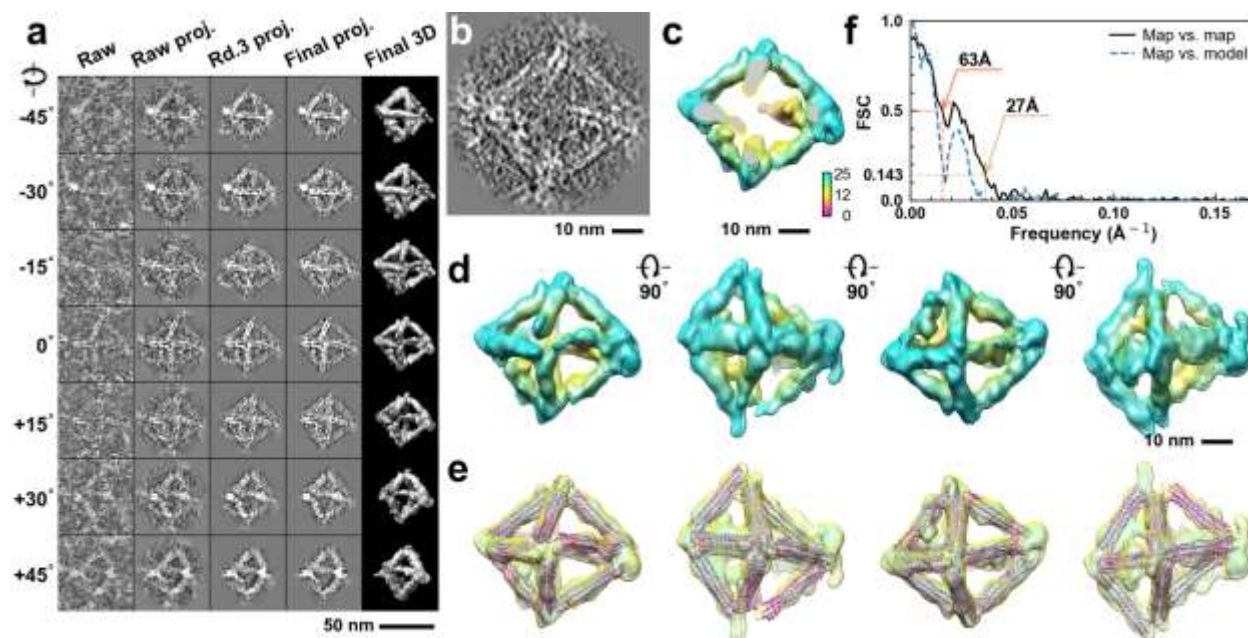

**Supplementary Fig. 290: IPET 3D reconstruction and model fitting of an individual unit-cell particle (Index: 282) within a 2D lattice with 0% ferritin loading.** **a**, Seven representative tilt images of a single unit-cell particle are shown in the first column (from left). The tilt images are aligned to a common center using IPET through iterative refinement. The projections of the raw, intermediate, and final 3D reconstruction at the corresponding angles are displayed in the subsequent four columns. **b**, A central cross-section (~23 nm thick) of the final reconstruction before masking is applied. **c**, 3D views of the central cross-section. **d**, Final 3D density map of this particle, viewed from four perpendicular directions. **e**, Final 3D reconstruction superimposed with the fitted model, viewed from four perpendicular directions. **f**, FSC analyses of the final map resolution using two methods: map-map FSC, where each map is reconstructed from one half of the images (even vs. odd tilt angle indices), and map-model FSC, where the model map is generated from the fitted model. Resolution assessments are provided based on tilt-based map-map and map-model FSC analyses at thresholds of FSC=0.5 and 0.143, respectively.

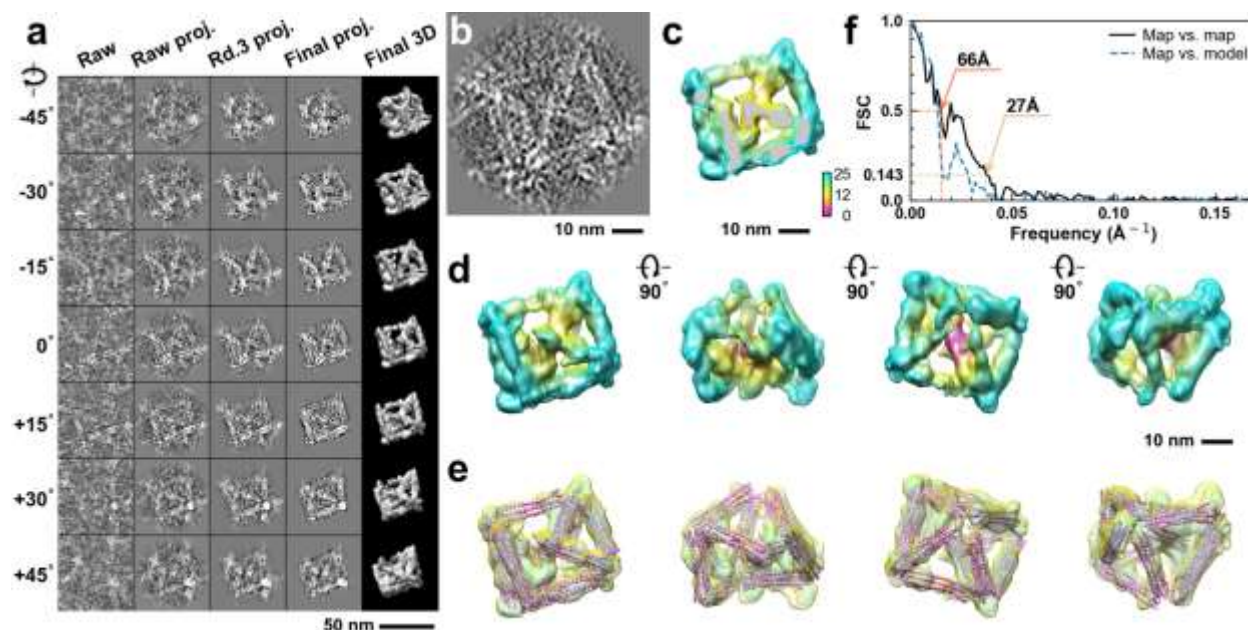

**Supplementary Fig. 291: IPET 3D reconstruction and model fitting of an individual unit-cell particle (Index: 283) within a 2D lattice with 0% ferritin loading.** **a**, Seven representative tilt images of a single unit-cell particle are shown in the first column (from left). The tilt images are aligned to a common center using IPET through iterative refinement. The projections of the raw, intermediate, and final 3D reconstruction at the corresponding angles are displayed in the subsequent four columns. **b**, A central cross-section (~23 nm thick) of the final reconstruction before masking is applied. **c**, 3D views of the central cross-section. **d**, Final 3D density map of this particle, viewed from four perpendicular directions. **e**, Final 3D reconstruction superimposed with the fitted model, viewed from four perpendicular directions. **f**, FSC analyses of the final map resolution using two methods: map-map FSC, where each map is reconstructed from one half of the images (even vs. odd tilt angle indices), and map-model FSC, where the model map is generated from the fitted model. Resolution assessments are provided based on tilt-based map-map and map-model FSC analyses at thresholds of FSC=0.5 and 0.143, respectively.

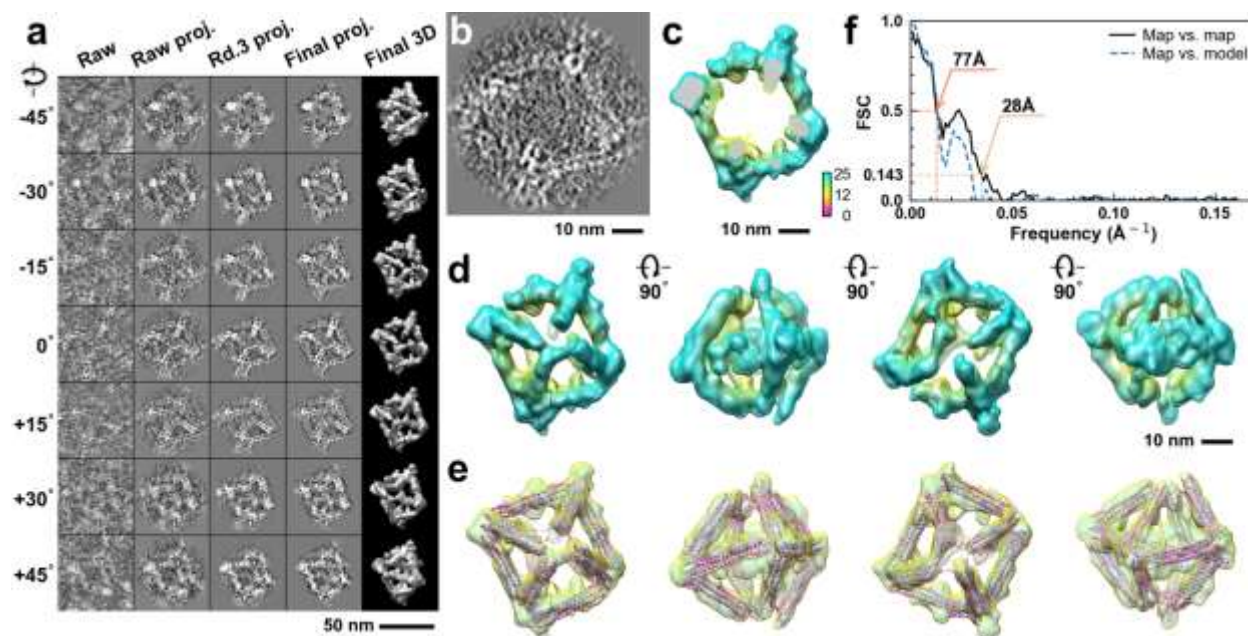

**Supplementary Fig. 292: IPET 3D reconstruction and model fitting of an individual unit-cell particle (Index: 284) within a 2D lattice with 0% ferritin loading.** **a**, Seven representative tilt images of a single unit-cell particle are shown in the first column (from left). The tilt images are aligned to a common center using IPET through iterative refinement. The projections of the raw, intermediate, and final 3D reconstruction at the corresponding angles are displayed in the subsequent four columns. **b**, A central cross-section (~23 nm thick) of the final reconstruction before masking is applied. **c**, 3D views of the central cross-section. **d**, Final 3D density map of this particle, viewed from four perpendicular directions. **e**, Final 3D reconstruction superimposed with the fitted model, viewed from four perpendicular directions. **f**, FSC analyses of the final map resolution using two methods: map-map FSC, where each map is reconstructed from one half of the images (even vs. odd tilt angle indices), and map-model FSC, where the model map is generated from the fitted model. Resolution assessments are provided based on tilt-based map-map and map-model FSC analyses at thresholds of FSC=0.5 and 0.143, respectively.

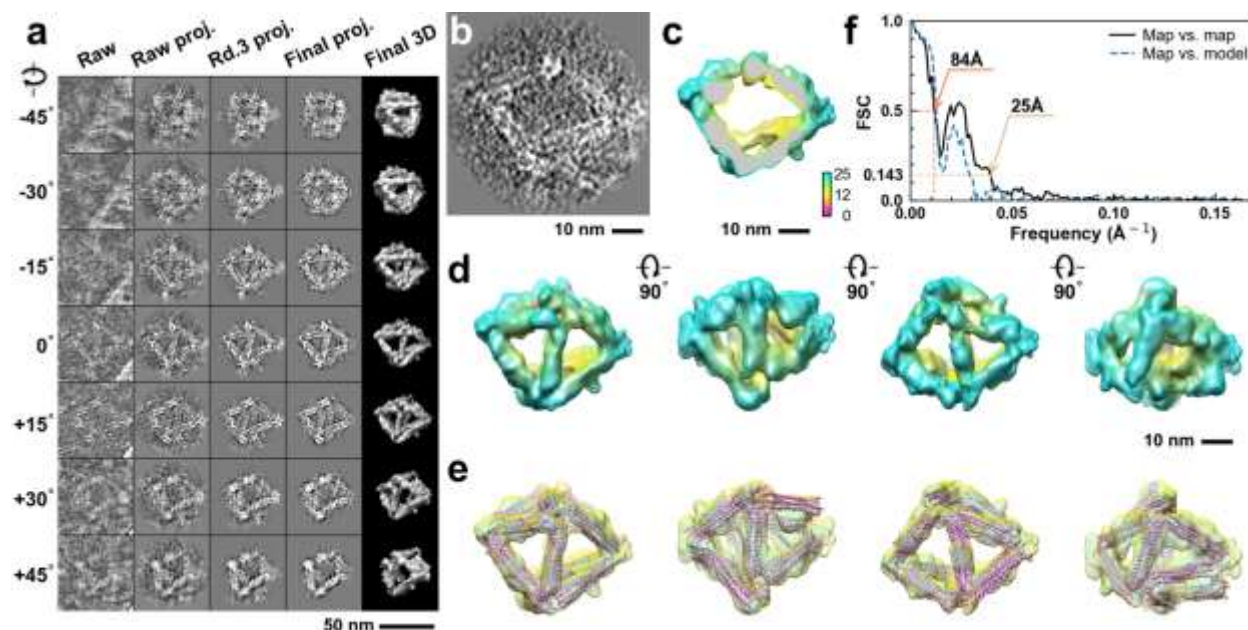

**Supplementary Fig. 293: IPET 3D reconstruction and model fitting of an individual unit-cell particle (Index: 285) within a 2D lattice with 0% ferritin loading.** **a**, Seven representative tilt images of a single unit-cell particle are shown in the first column (from left). The tilt images are aligned to a common center using IPET through iterative refinement. The projections of the raw, intermediate, and final 3D reconstruction at the corresponding angles are displayed in the subsequent four columns. **b**, A central cross-section (~23 nm thick) of the final reconstruction before masking is applied. **c**, 3D views of the central cross-section. **d**, Final 3D density map of this particle, viewed from four perpendicular directions. **e**, Final 3D reconstruction superimposed with the fitted model, viewed from four perpendicular directions. **f**, FSC analyses of the final map resolution using two methods: map-map FSC, where each map is reconstructed from one half of the images (even vs. odd tilt angle indices), and map-model FSC, where the model map is generated from the fitted model. Resolution assessments are provided based on tilt-based map-map and map-model FSC analyses at thresholds of FSC=0.5 and 0.143, respectively.



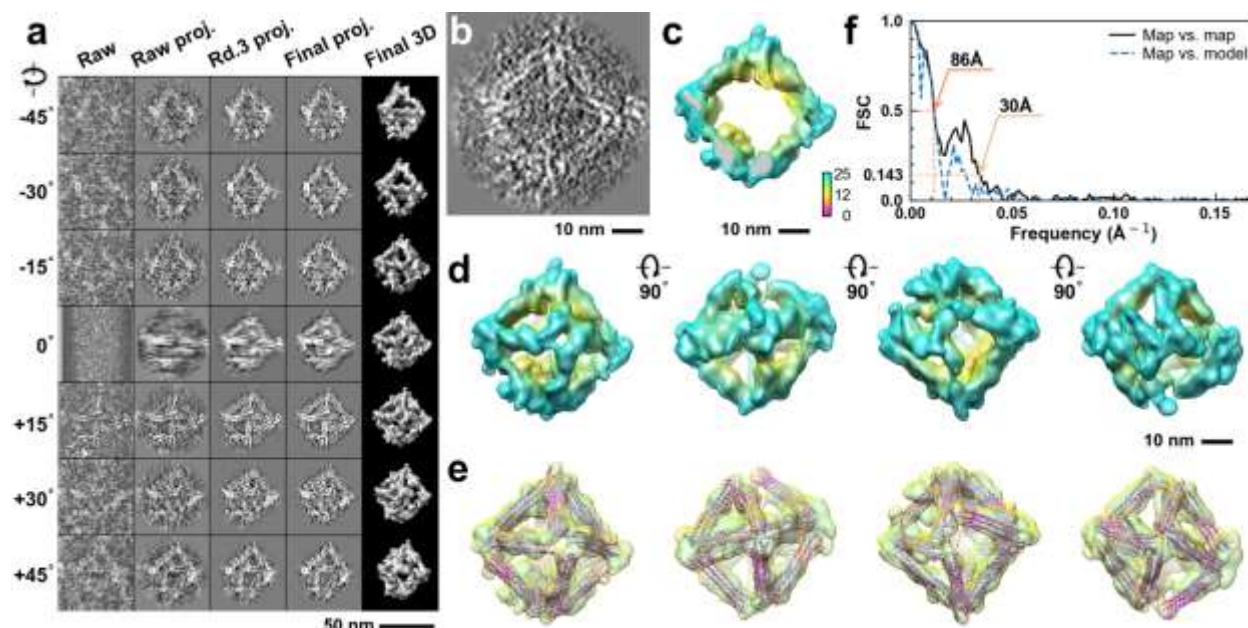

**Supplementary Fig. 294: IPET 3D reconstruction and model fitting of an individual unit-cell particle (Index: 286) within a 2D lattice with 0% ferritin loading.** **a**, Seven representative tilt images of a single unit-cell particle are shown in the first column (from left). The tilt images are aligned to a common center using IPET through iterative refinement. The projections of the raw, intermediate, and final 3D reconstruction at the corresponding angles are displayed in the subsequent four columns. **b**, A central cross-section (~23 nm thick) of the final reconstruction before masking is applied. **c**, 3D views of the central cross-section. **d**, Final 3D density map of this particle, viewed from four perpendicular directions. **e**, Final 3D reconstruction superimposed with the fitted model, viewed from four perpendicular directions. **f**, FSC analyses of the final map resolution using two methods: map-map FSC, where each map is reconstructed from one half of the images (even vs. odd tilt angle indices), and map-model FSC, where the model map is generated from the fitted model. Resolution assessments are provided based on tilt-based map-map and map-model FSC analyses at thresholds of FSC=0.5 and 0.143, respectively.

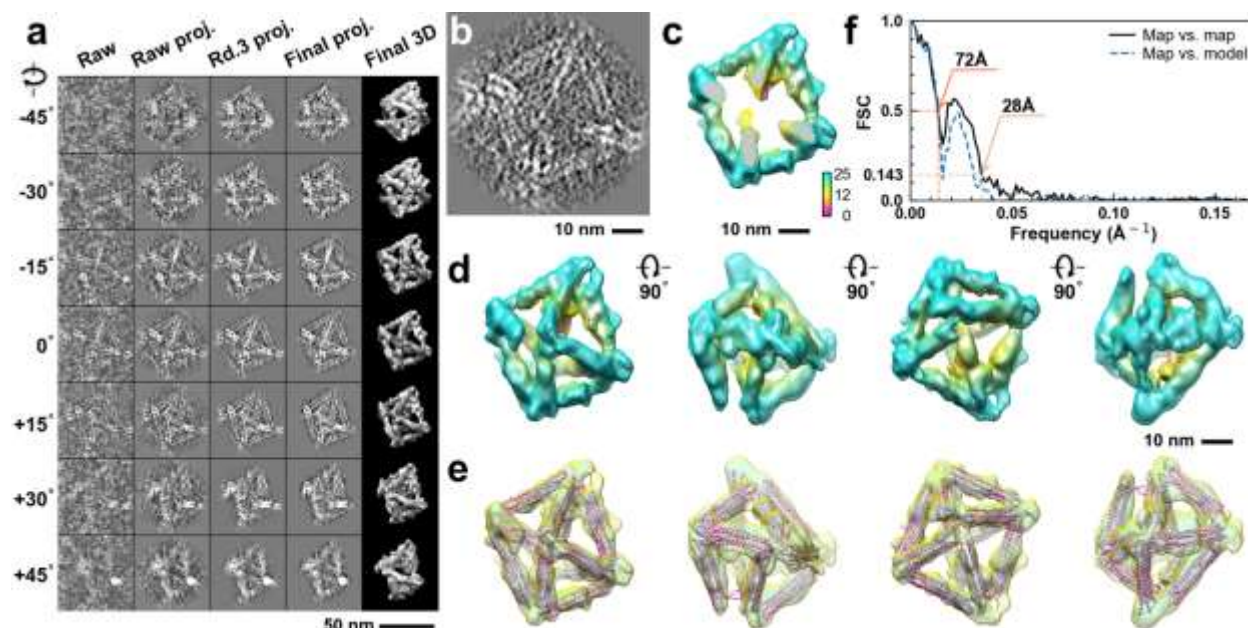

**Supplementary Fig. 295: IPET 3D reconstruction and model fitting of an individual unit-cell particle (Index: 287) within a 2D lattice with 0% ferritin loading.** **a**, Seven representative tilt images of a single unit-cell particle are shown in the first column (from left). The tilt images are aligned to a common center using IPET through iterative refinement. The projections of the raw, intermediate, and final 3D reconstruction at the corresponding angles are displayed in the subsequent four columns. **b**, A central cross-section (~23 nm thick) of the final reconstruction before masking is applied. **c**, 3D views of the central cross-section. **d**, Final 3D density map of this particle, viewed from four perpendicular directions. **e**, Final 3D reconstruction superimposed with the fitted model, viewed from four perpendicular directions. **f**, FSC analyses of the final map resolution using two methods: map-map FSC, where each map is reconstructed from one half of the images (even vs. odd tilt angle indices), and map-model FSC, where the model map is generated from the fitted model. Resolution assessments are provided based on tilt-based map-map and map-model FSC analyses at thresholds of FSC=0.5 and 0.143, respectively.

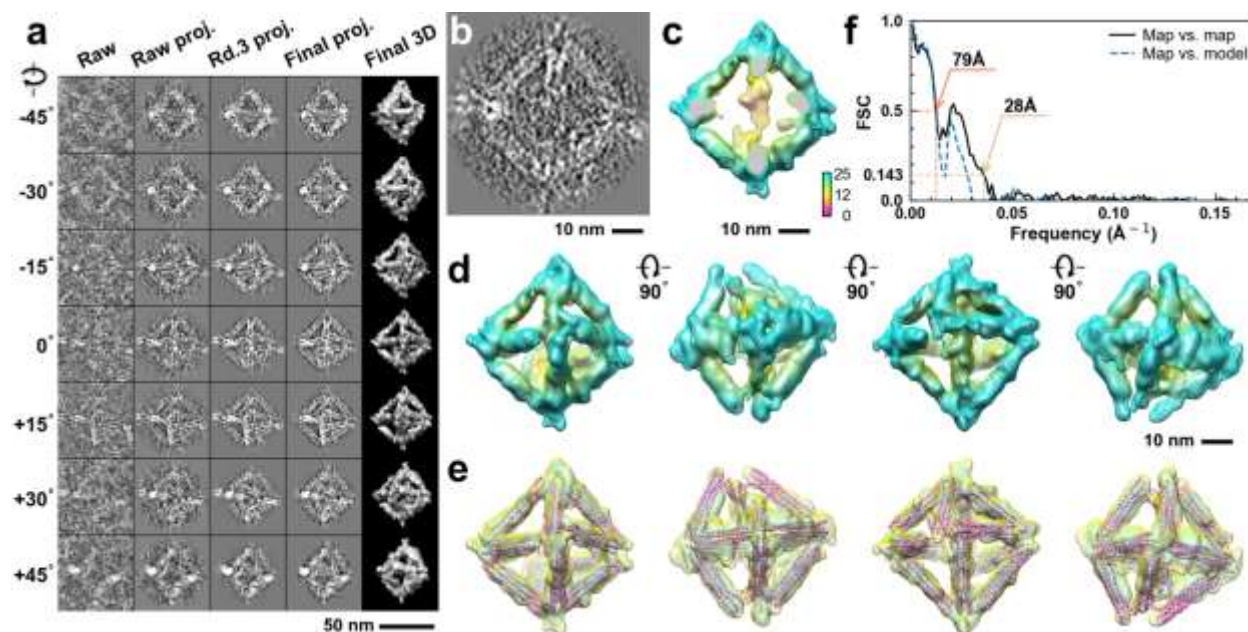

**Supplementary Fig. 296: IPET 3D reconstruction and model fitting of an individual unit-cell particle (Index: 288) within a 2D lattice with 0% ferritin loading.** **a**, Seven representative tilt images of a single unit-cell particle are shown in the first column (from left). The tilt images are aligned to a common center using IPET through iterative refinement. The projections of the raw, intermediate, and final 3D reconstruction at the corresponding angles are displayed in the subsequent four columns. **b**, A central cross-section (~23 nm thick) of the final reconstruction before masking is applied. **c**, 3D views of the central cross-section. **d**, Final 3D density map of this particle, viewed from four perpendicular directions. **e**, Final 3D reconstruction superimposed with the fitted model, viewed from four perpendicular directions. **f**, FSC analyses of the final map resolution using two methods: map-map FSC, where each map is reconstructed from one half of the images (even vs. odd tilt angle indices), and map-model FSC, where the model map is generated from the fitted model. Resolution assessments are provided based on tilt-based map-map and map-model FSC analyses at thresholds of FSC=0.5 and 0.143, respectively.

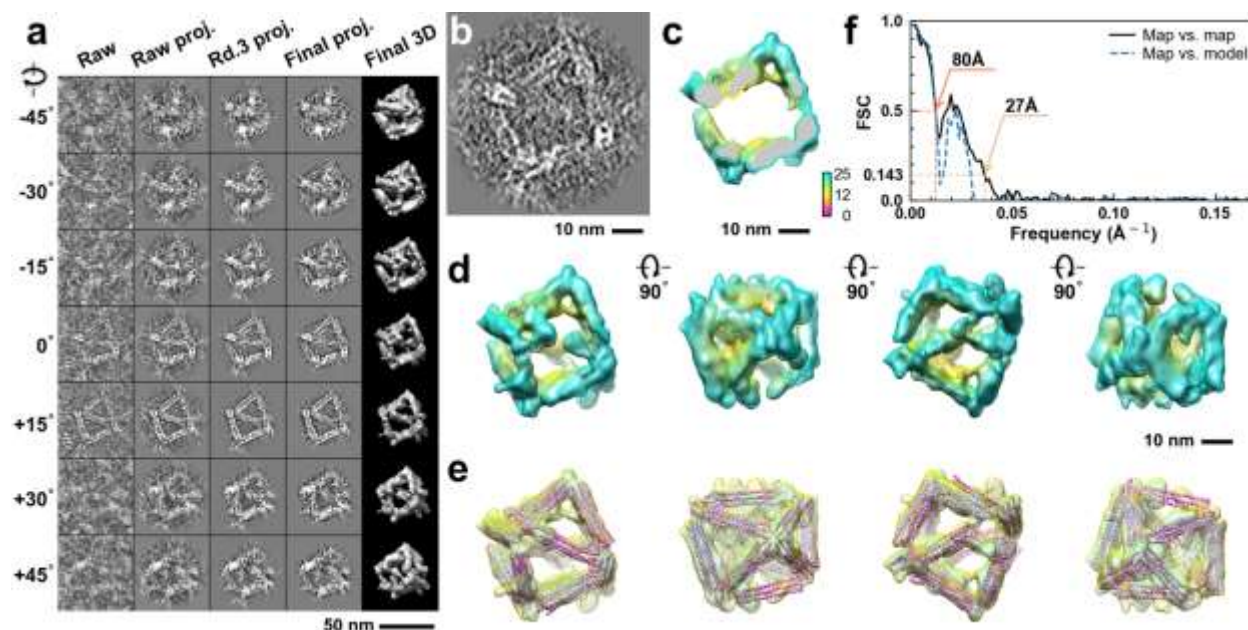

**Supplementary Fig. 297: IPET 3D reconstruction and model fitting of an individual unit-cell particle (Index: 289) within a 2D lattice with 0% ferritin loading.** **a**, Seven representative tilt images of a single unit-cell particle are shown in the first column (from left). The tilt images are aligned to a common center using IPET through iterative refinement. The projections of the raw, intermediate, and final 3D reconstruction at the corresponding angles are displayed in the subsequent four columns. **b**, A central cross-section (~23 nm thick) of the final reconstruction before masking is applied. **c**, 3D views of the central cross-section. **d**, Final 3D density map of this particle, viewed from four perpendicular directions. **e**, Final 3D reconstruction superimposed with the fitted model, viewed from four perpendicular directions. **f**, FSC analyses of the final map resolution using two methods: map-map FSC, where each map is reconstructed from one half of the images (even vs. odd tilt angle indices), and map-model FSC, where the model map is generated from the fitted model. Resolution assessments are provided based on tilt-based map-map and map-model FSC analyses at thresholds of FSC=0.5 and 0.143, respectively.



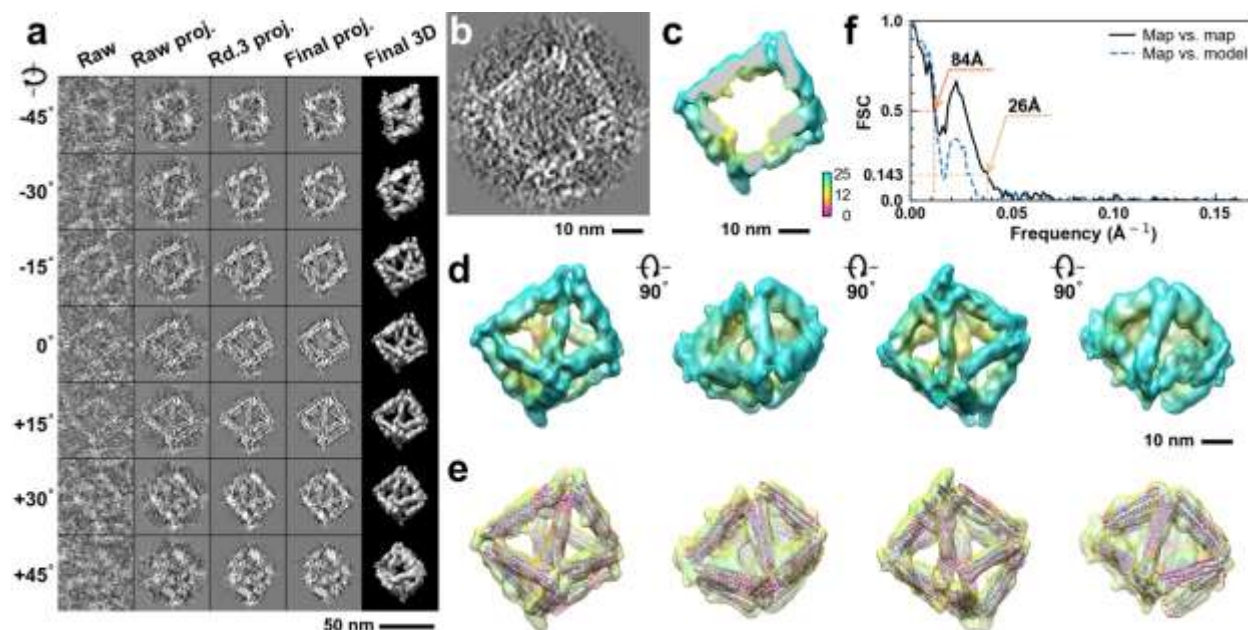

**Supplementary Fig. 298: IPET 3D reconstruction and model fitting of an individual unit-cell particle (Index: 290) within a 2D lattice with 0% ferritin loading.** **a**, Seven representative tilt images of a single unit-cell particle are shown in the first column (from left). The tilt images are aligned to a common center using IPET through iterative refinement. The projections of the raw, intermediate, and final 3D reconstruction at the corresponding angles are displayed in the subsequent four columns. **b**, A central cross-section (~23 nm thick) of the final reconstruction before masking is applied. **c**, 3D views of the central cross-section. **d**, Final 3D density map of this particle, viewed from four perpendicular directions. **e**, Final 3D reconstruction superimposed with the fitted model, viewed from four perpendicular directions. **f**, FSC analyses of the final map resolution using two methods: map-map FSC, where each map is reconstructed from one half of the images (even vs. odd tilt angle indices), and map-model FSC, where the model map is generated from the fitted model. Resolution assessments are provided based on tilt-based map-map and map-model FSC analyses at thresholds of FSC=0.5 and 0.143, respectively.

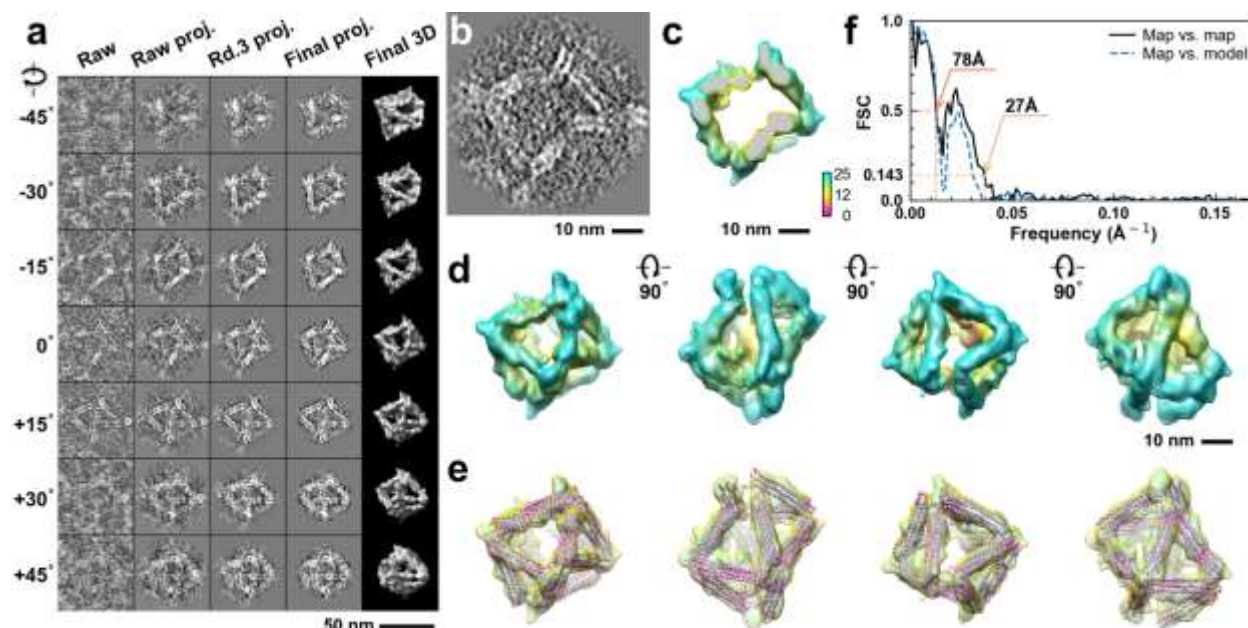

**Supplementary Fig. 299: IPET 3D reconstruction and model fitting of an individual unit-cell particle (Index: 291) within a 2D lattice with 0% ferritin loading.** **a**, Seven representative tilt images of a single unit-cell particle are shown in the first column (from left). The tilt images are aligned to a common center using IPET through iterative refinement. The projections of the raw, intermediate, and final 3D reconstruction at the corresponding angles are displayed in the subsequent four columns. **b**, A central cross-section (~23 nm thick) of the final reconstruction before masking is applied. **c**, 3D views of the central cross-section. **d**, Final 3D density map of this particle, viewed from four perpendicular directions. **e**, Final 3D reconstruction superimposed with the fitted model, viewed from four perpendicular directions. **f**, FSC analyses of the final map resolution using two methods: map-map FSC, where each map is reconstructed from one half of the images (even vs. odd tilt angle indices), and map-model FSC, where the model map is generated from the fitted model. Resolution assessments are provided based on tilt-based map-map and map-model FSC analyses at thresholds of FSC=0.5 and 0.143, respectively.

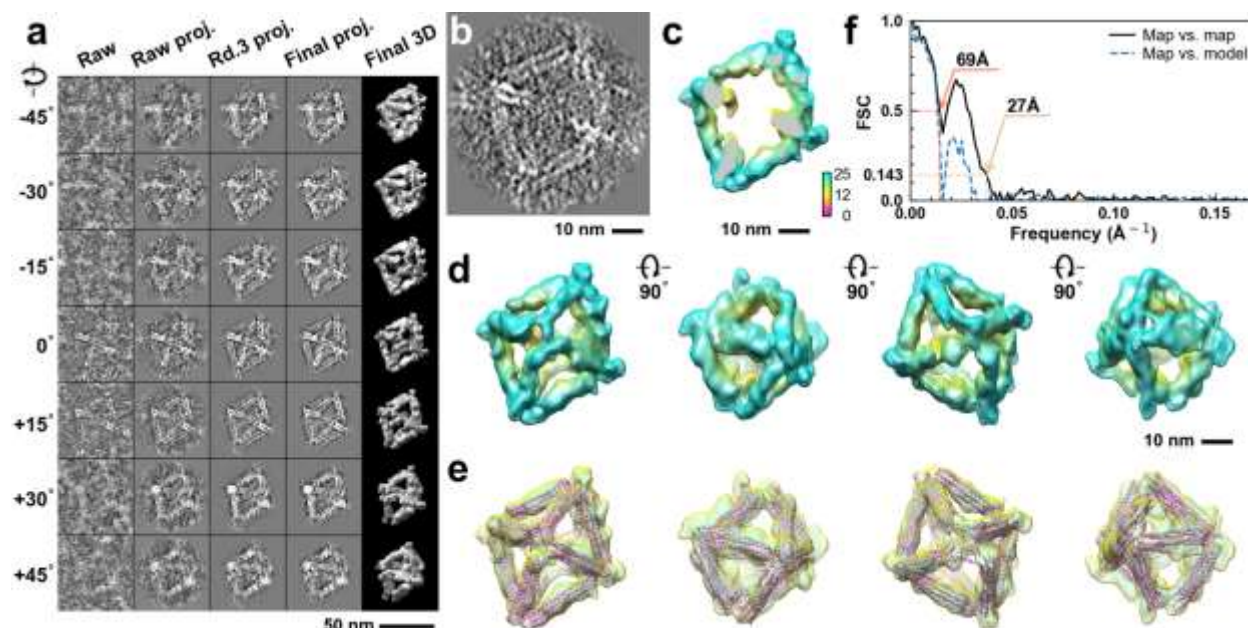

**Supplementary Fig. 300: IPET 3D reconstruction and model fitting of an individual unit-cell particle (Index: 292) within a 2D lattice with 0% ferritin loading.** **a**, Seven representative tilt images of a single unit-cell particle are shown in the first column (from left). The tilt images are aligned to a common center using IPET through iterative refinement. The projections of the raw, intermediate, and final 3D reconstruction at the corresponding angles are displayed in the subsequent four columns. **b**, A central cross-section (~23 nm thick) of the final reconstruction before masking is applied. **c**, 3D views of the central cross-section. **d**, Final 3D density map of this particle, viewed from four perpendicular directions. **e**, Final 3D reconstruction superimposed with the fitted model, viewed from four perpendicular directions. **f**, FSC analyses of the final map resolution using two methods: map-map FSC, where each map is reconstructed from one half of the images (even vs. odd tilt angle indices), and map-model FSC, where the model map is generated from the fitted model. Resolution assessments are provided based on tilt-based map-map and map-model FSC analyses at thresholds of FSC=0.5 and 0.143, respectively.

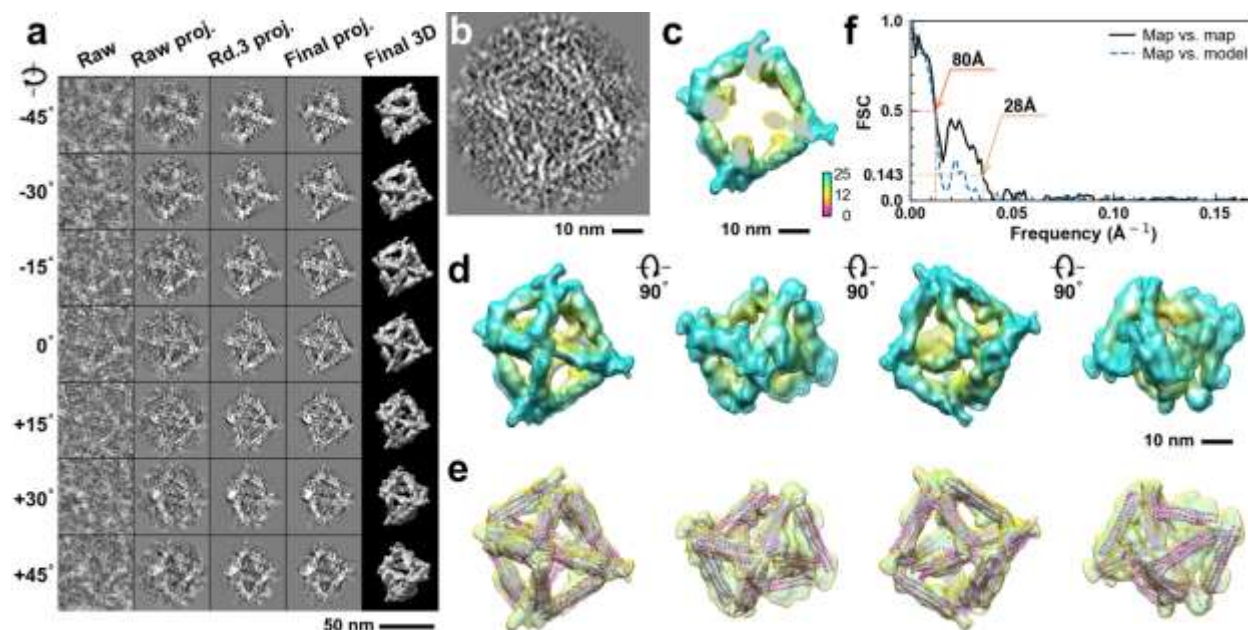

**Supplementary Fig. 301: IPET 3D reconstruction and model fitting of an individual unit-cell particle (Index: 293) within a 2D lattice with 0% ferritin loading.** **a**, Seven representative tilt images of a single unit-cell particle are shown in the first column (from left). The tilt images are aligned to a common center using IPET through iterative refinement. The projections of the raw, intermediate, and final 3D reconstruction at the corresponding angles are displayed in the subsequent four columns. **b**, A central cross-section (~23 nm thick) of the final reconstruction before masking is applied. **c**, 3D views of the central cross-section. **d**, Final 3D density map of this particle, viewed from four perpendicular directions. **e**, Final 3D reconstruction superimposed with the fitted model, viewed from four perpendicular directions. **f**, FSC analyses of the final map resolution using two methods: map-map FSC, where each map is reconstructed from one half of the images (even vs. odd tilt angle indices), and map-model FSC, where the model map is generated from the fitted model. Resolution assessments are provided based on tilt-based map-map and map-model FSC analyses at thresholds of FSC=0.5 and 0.143, respectively.



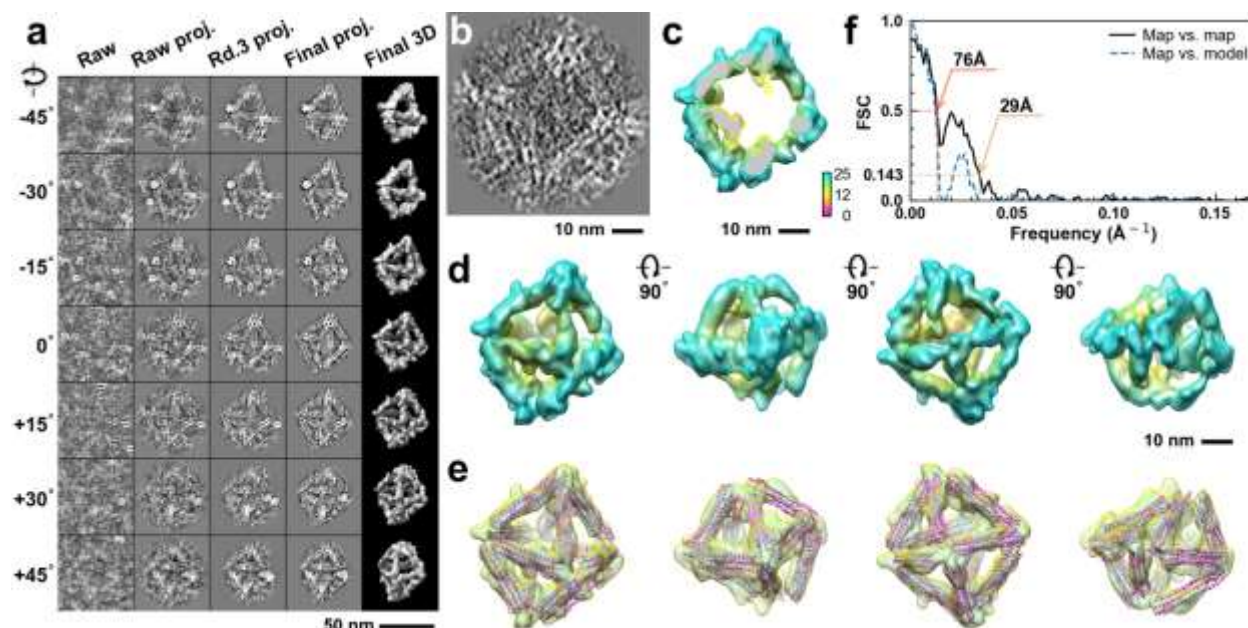

**Supplementary Fig. 302: IPET 3D reconstruction and model fitting of an individual unit-cell particle (Index: 294) within a 2D lattice with 0% ferritin loading.** **a**, Seven representative tilt images of a single unit-cell particle are shown in the first column (from left). The tilt images are aligned to a common center using IPET through iterative refinement. The projections of the raw, intermediate, and final 3D reconstruction at the corresponding angles are displayed in the subsequent four columns. **b**, A central cross-section (~23 nm thick) of the final reconstruction before masking is applied. **c**, 3D views of the central cross-section. **d**, Final 3D density map of this particle, viewed from four perpendicular directions. **e**, Final 3D reconstruction superimposed with the fitted model, viewed from four perpendicular directions. **f**, FSC analyses of the final map resolution using two methods: map-map FSC, where each map is reconstructed from one half of the images (even vs. odd tilt angle indices), and map-model FSC, where the model map is generated from the fitted model. Resolution assessments are provided based on tilt-based map-map and map-model FSC analyses at thresholds of FSC=0.5 and 0.143, respectively.

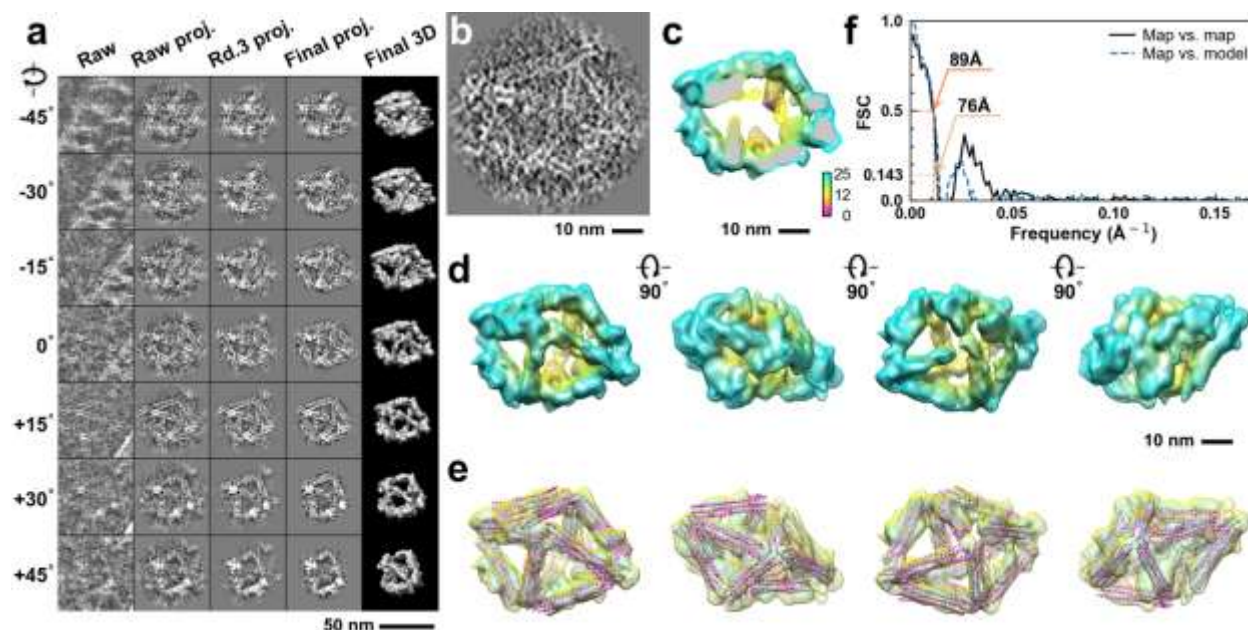

**Supplementary Fig. 303: IPET 3D reconstruction and model fitting of an individual unit-cell particle (Index: 295) within a 2D lattice with 0% ferritin loading.** **a**, Seven representative tilt images of a single unit-cell particle are shown in the first column (from left). The tilt images are aligned to a common center using IPET through iterative refinement. The projections of the raw, intermediate, and final 3D reconstruction at the corresponding angles are displayed in the subsequent four columns. **b**, A central cross-section (~23 nm thick) of the final reconstruction before masking is applied. **c**, 3D views of the central cross-section. **d**, Final 3D density map of this particle, viewed from four perpendicular directions. **e**, Final 3D reconstruction superimposed with the fitted model, viewed from four perpendicular directions. **f**, FSC analyses of the final map resolution using two methods: map-map FSC, where each map is reconstructed from one half of the images (even vs. odd tilt angle indices), and map-model FSC, where the model map is generated from the fitted model. Resolution assessments are provided based on tilt-based map-map and map-model FSC analyses at thresholds of FSC=0.5 and 0.143, respectively.

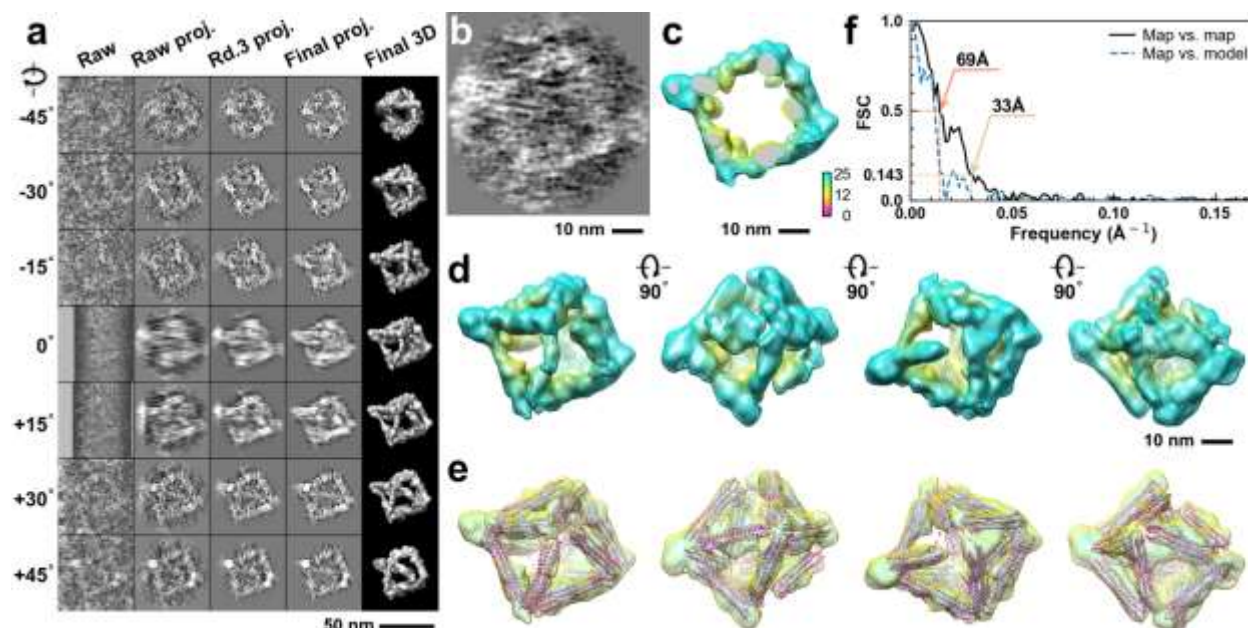

**Supplementary Fig. 304: IPET 3D reconstruction and model fitting of an individual unit-cell particle (Index: 296) within a 2D lattice with 0% ferritin loading.** **a**, Seven representative tilt images of a single unit-cell particle are shown in the first column (from left). The tilt images are aligned to a common center using IPET through iterative refinement. The projections of the raw, intermediate, and final 3D reconstruction at the corresponding angles are displayed in the subsequent four columns. **b**, A central cross-section (~23 nm thick) of the final reconstruction before masking is applied. **c**, 3D views of the central cross-section. **d**, Final 3D density map of this particle, viewed from four perpendicular directions. **e**, Final 3D reconstruction superimposed with the fitted model, viewed from four perpendicular directions. **f**, FSC analyses of the final map resolution using two methods: map-map FSC, where each map is reconstructed from one half of the images (even vs. odd tilt angle indices), and map-model FSC, where the model map is generated from the fitted model. Resolution assessments are provided based on tilt-based map-map and map-model FSC analyses at thresholds of FSC=0.5 and 0.143, respectively.

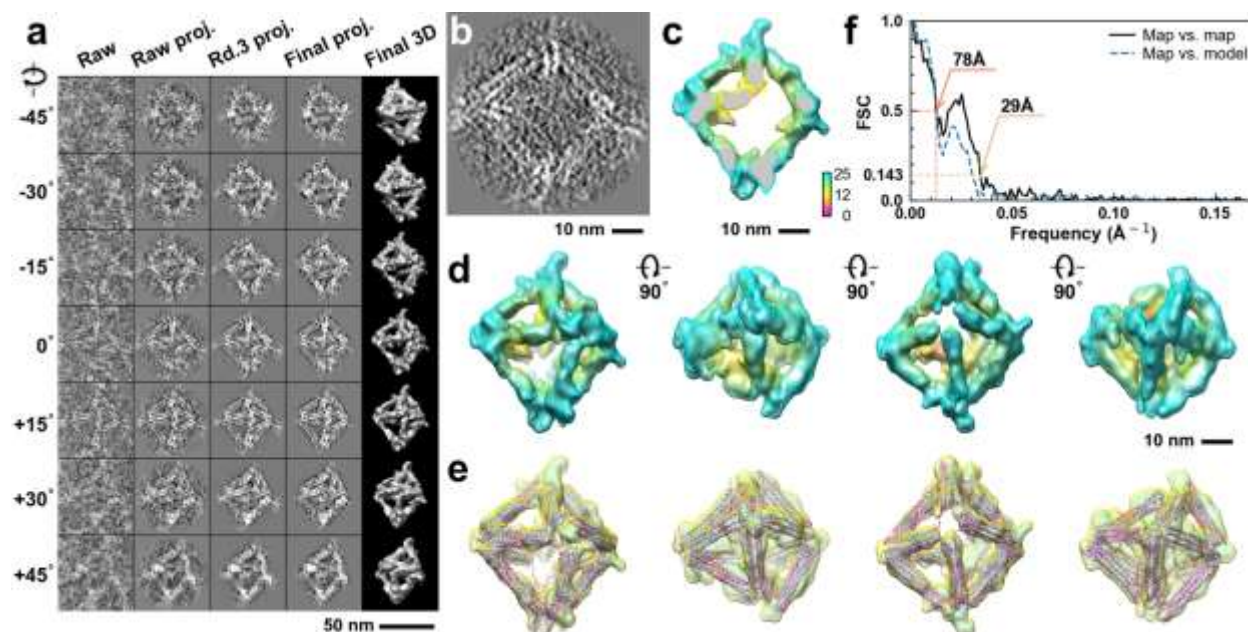

**Supplementary Fig. 305: IPET 3D reconstruction and model fitting of an individual unit-cell particle (Index: 297) within a 2D lattice with 0% ferritin loading.** **a**, Seven representative tilt images of a single unit-cell particle are shown in the first column (from left). The tilt images are aligned to a common center using IPET through iterative refinement. The projections of the raw, intermediate, and final 3D reconstruction at the corresponding angles are displayed in the subsequent four columns. **b**, A central cross-section (~23 nm thick) of the final reconstruction before masking is applied. **c**, 3D views of the central cross-section. **d**, Final 3D density map of this particle, viewed from four perpendicular directions. **e**, Final 3D reconstruction superimposed with the fitted model, viewed from four perpendicular directions. **f**, FSC analyses of the final map resolution using two methods: map-map FSC, where each map is reconstructed from one half of the images (even vs. odd tilt angle indices), and map-model FSC, where the model map is generated from the fitted model. Resolution assessments are provided based on tilt-based map-map and map-model FSC analyses at thresholds of FSC=0.5 and 0.143, respectively.



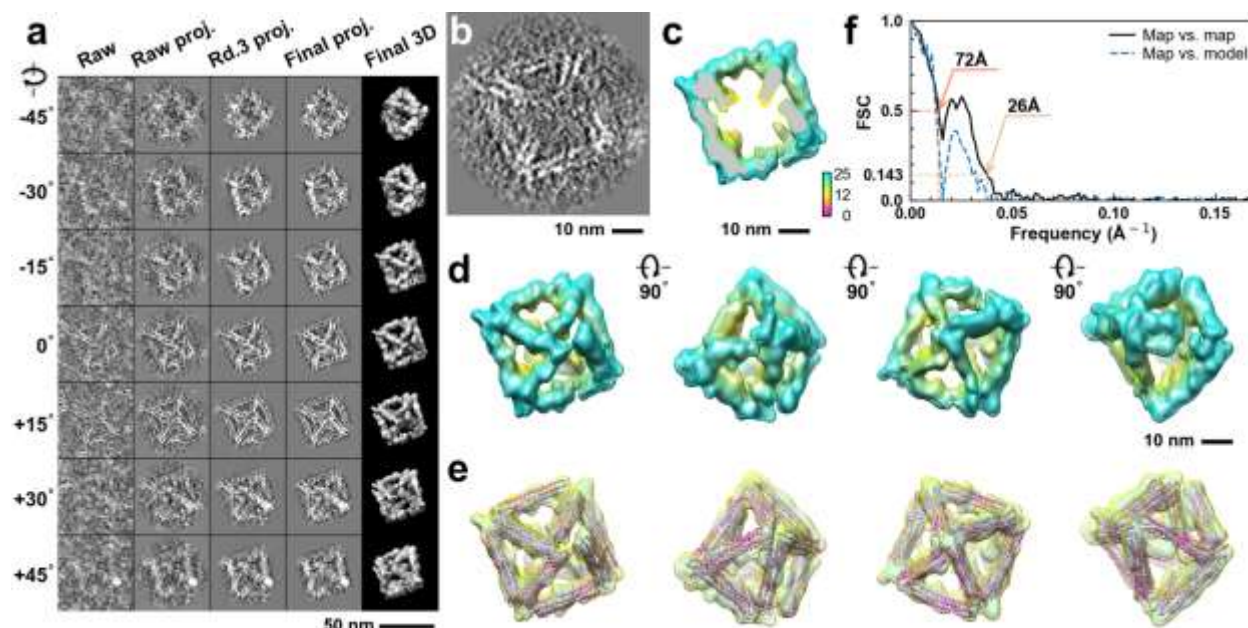

**Supplementary Fig. 306: IPET 3D reconstruction and model fitting of an individual unit-cell particle (Index: 298) within a 2D lattice with 0% ferritin loading.** **a**, Seven representative tilt images of a single unit-cell particle are shown in the first column (from left). The tilt images are aligned to a common center using IPET through iterative refinement. The projections of the raw, intermediate, and final 3D reconstruction at the corresponding angles are displayed in the subsequent four columns. **b**, A central cross-section (~23 nm thick) of the final reconstruction before masking is applied. **c**, 3D views of the central cross-section. **d**, Final 3D density map of this particle, viewed from four perpendicular directions. **e**, Final 3D reconstruction superimposed with the fitted model, viewed from four perpendicular directions. **f**, FSC analyses of the final map resolution using two methods: map-map FSC, where each map is reconstructed from one half of the images (even vs. odd tilt angle indices), and map-model FSC, where the model map is generated from the fitted model. Resolution assessments are provided based on tilt-based map-map and map-model FSC analyses at thresholds of FSC=0.5 and 0.143, respectively.

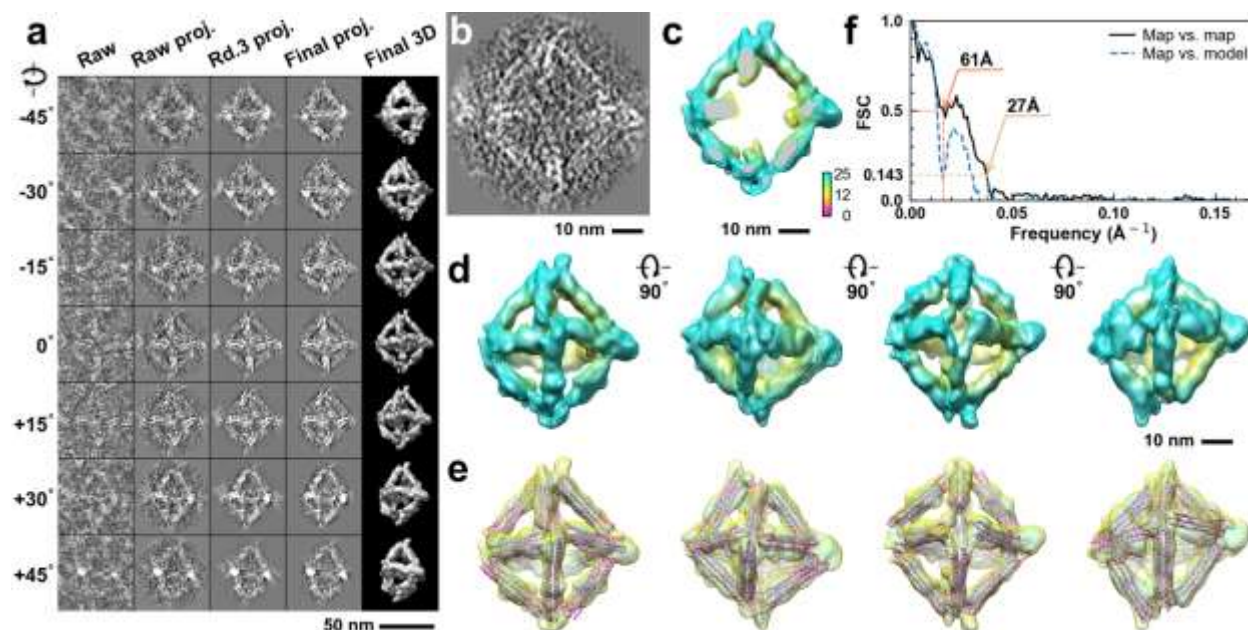

**Supplementary Fig. 307: IPET 3D reconstruction and model fitting of an individual unit-cell particle (Index: 299) within a 2D lattice with 0% ferritin loading.** **a**, Seven representative tilt images of a single unit-cell particle are shown in the first column (from left). The tilt images are aligned to a common center using IPET through iterative refinement. The projections of the raw, intermediate, and final 3D reconstruction at the corresponding angles are displayed in the subsequent four columns. **b**, A central cross-section (~23 nm thick) of the final reconstruction before masking is applied. **c**, 3D views of the central cross-section. **d**, Final 3D density map of this particle, viewed from four perpendicular directions. **e**, Final 3D reconstruction superimposed with the fitted model, viewed from four perpendicular directions. **f**, FSC analyses of the final map resolution using two methods: map-map FSC, where each map is reconstructed from one half of the images (even vs. odd tilt angle indices), and map-model FSC, where the model map is generated from the fitted model. Resolution assessments are provided based on tilt-based map-map and map-model FSC analyses at thresholds of FSC=0.5 and 0.143, respectively.

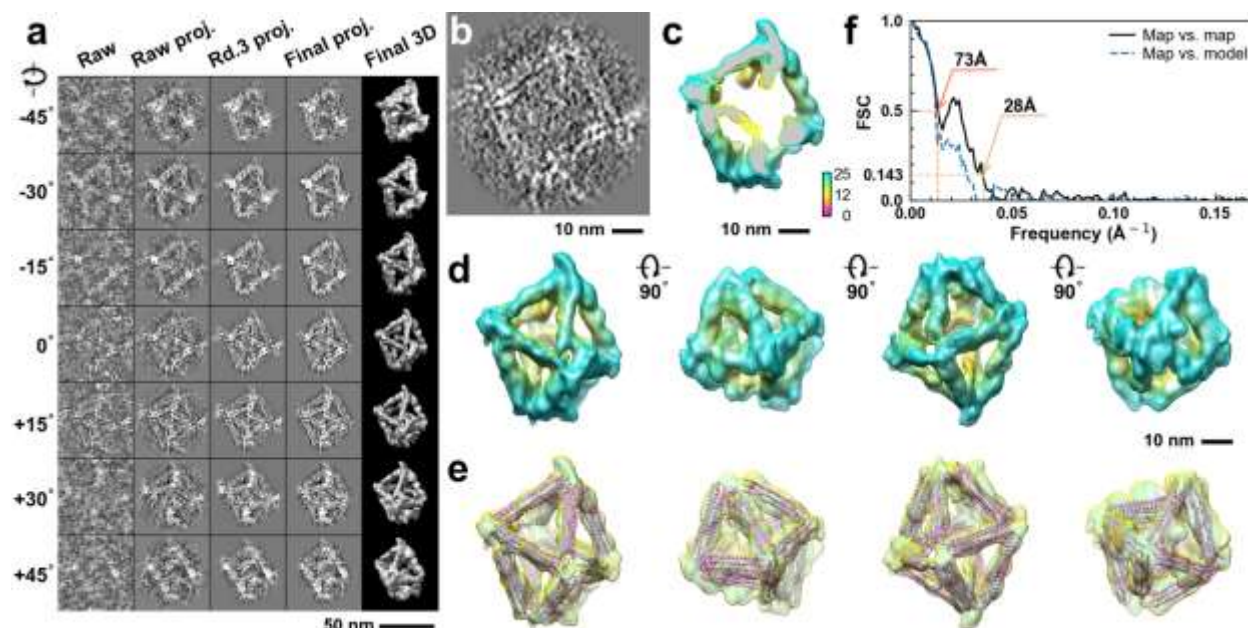

**Supplementary Fig. 308: IPET 3D reconstruction and model fitting of an individual unit-cell particle (Index: 300) within a 2D lattice with 0% ferritin loading.** **a**, Seven representative tilt images of a single unit-cell particle are shown in the first column (from left). The tilt images are aligned to a common center using IPET through iterative refinement. The projections of the raw, intermediate, and final 3D reconstruction at the corresponding angles are displayed in the subsequent four columns. **b**, A central cross-section (~23 nm thick) of the final reconstruction before masking is applied. **c**, 3D views of the central cross-section. **d**, Final 3D density map of this particle, viewed from four perpendicular directions. **e**, Final 3D reconstruction superimposed with the fitted model, viewed from four perpendicular directions. **f**, FSC analyses of the final map resolution using two methods: map-map FSC, where each map is reconstructed from one half of the images (even vs. odd tilt angle indices), and map-model FSC, where the model map is generated from the fitted model. Resolution assessments are provided based on tilt-based map-map and map-model FSC analyses at thresholds of FSC=0.5 and 0.143, respectively.

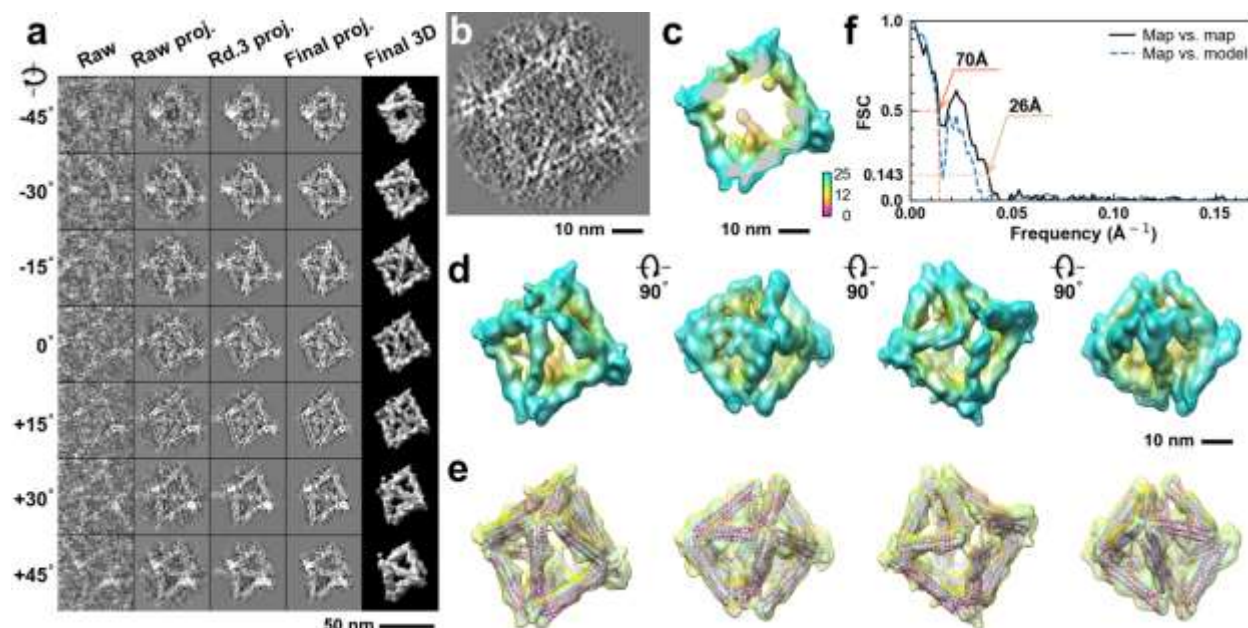

**Supplementary Fig. 309: IPET 3D reconstruction and model fitting of an individual unit-cell particle (Index: 301) within a 2D lattice with 0% ferritin loading.** **a**, Seven representative tilt images of a single unit-cell particle are shown in the first column (from left). The tilt images are aligned to a common center using IPET through iterative refinement. The projections of the raw, intermediate, and final 3D reconstruction at the corresponding angles are displayed in the subsequent four columns. **b**, A central cross-section (~23 nm thick) of the final reconstruction before masking is applied. **c**, 3D views of the central cross-section. **d**, Final 3D density map of this particle, viewed from four perpendicular directions. **e**, Final 3D reconstruction superimposed with the fitted model, viewed from four perpendicular directions. **f**, FSC analyses of the final map resolution using two methods: map-map FSC, where each map is reconstructed from one half of the images (even vs. odd tilt angle indices), and map-model FSC, where the model map is generated from the fitted model. Resolution assessments are provided based on tilt-based map-map and map-model FSC analyses at thresholds of FSC=0.5 and 0.143, respectively.



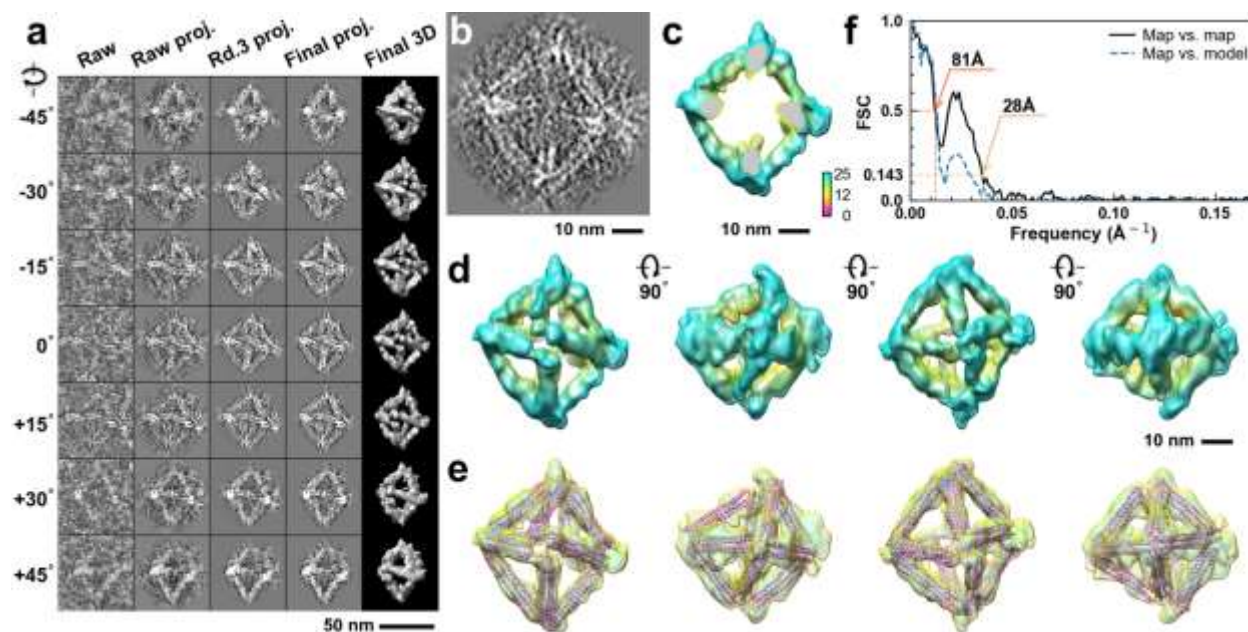

**Supplementary Fig. 310: IPET 3D reconstruction and model fitting of an individual unit-cell particle (Index: 302) within a 2D lattice with 0% ferritin loading.** **a**, Seven representative tilt images of a single unit-cell particle are shown in the first column (from left). The tilt images are aligned to a common center using IPET through iterative refinement. The projections of the raw, intermediate, and final 3D reconstruction at the corresponding angles are displayed in the subsequent four columns. **b**, A central cross-section (~23 nm thick) of the final reconstruction before masking is applied. **c**, 3D views of the central cross-section. **d**, Final 3D density map of this particle, viewed from four perpendicular directions. **e**, Final 3D reconstruction superimposed with the fitted model, viewed from four perpendicular directions. **f**, FSC analyses of the final map resolution using two methods: map-map FSC, where each map is reconstructed from one half of the images (even vs. odd tilt angle indices), and map-model FSC, where the model map is generated from the fitted model. Resolution assessments are provided based on tilt-based map-map and map-model FSC analyses at thresholds of FSC=0.5 and 0.143, respectively.

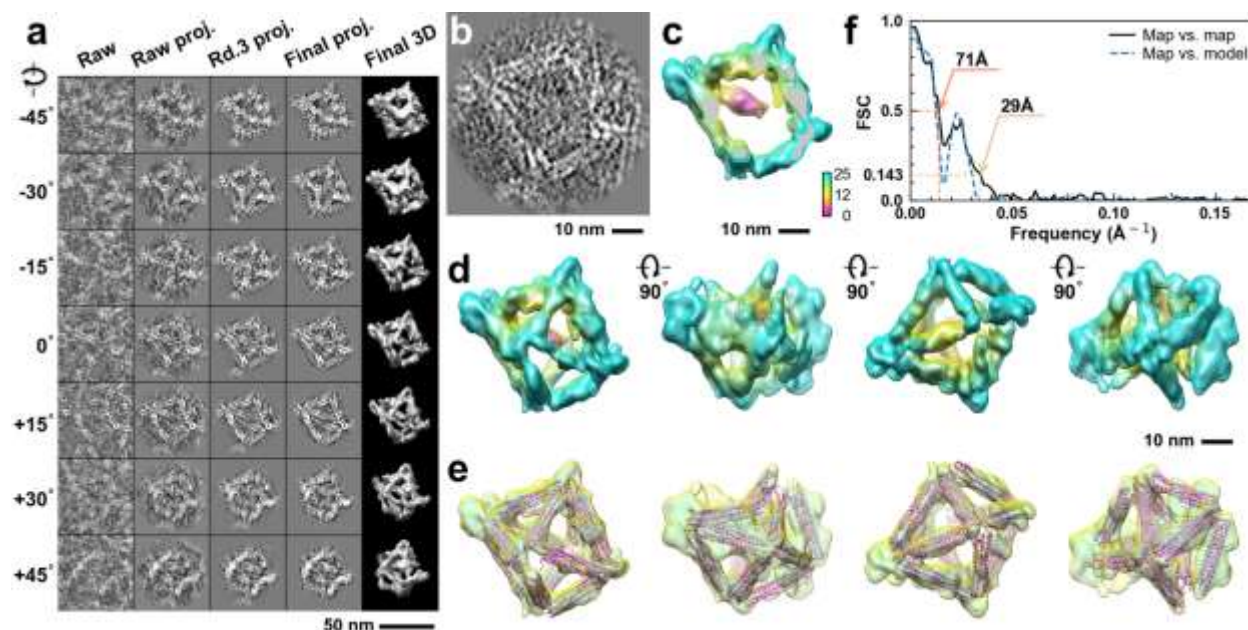

**Supplementary Fig. 311: IPET 3D reconstruction and model fitting of an individual unit-cell particle (Index: 303) within a 2D lattice with 0% ferritin loading.** **a**, Seven representative tilt images of a single unit-cell particle are shown in the first column (from left). The tilt images are aligned to a common center using IPET through iterative refinement. The projections of the raw, intermediate, and final 3D reconstruction at the corresponding angles are displayed in the subsequent four columns. **b**, A central cross-section (~23 nm thick) of the final reconstruction before masking is applied. **c**, 3D views of the central cross-section. **d**, Final 3D density map of this particle, viewed from four perpendicular directions. **e**, Final 3D reconstruction superimposed with the fitted model, viewed from four perpendicular directions. **f**, FSC analyses of the final map resolution using two methods: map-map FSC, where each map is reconstructed from one half of the images (even vs. odd tilt angle indices), and map-model FSC, where the model map is generated from the fitted model. Resolution assessments are provided based on tilt-based map-map and map-model FSC analyses at thresholds of FSC=0.5 and 0.143, respectively.

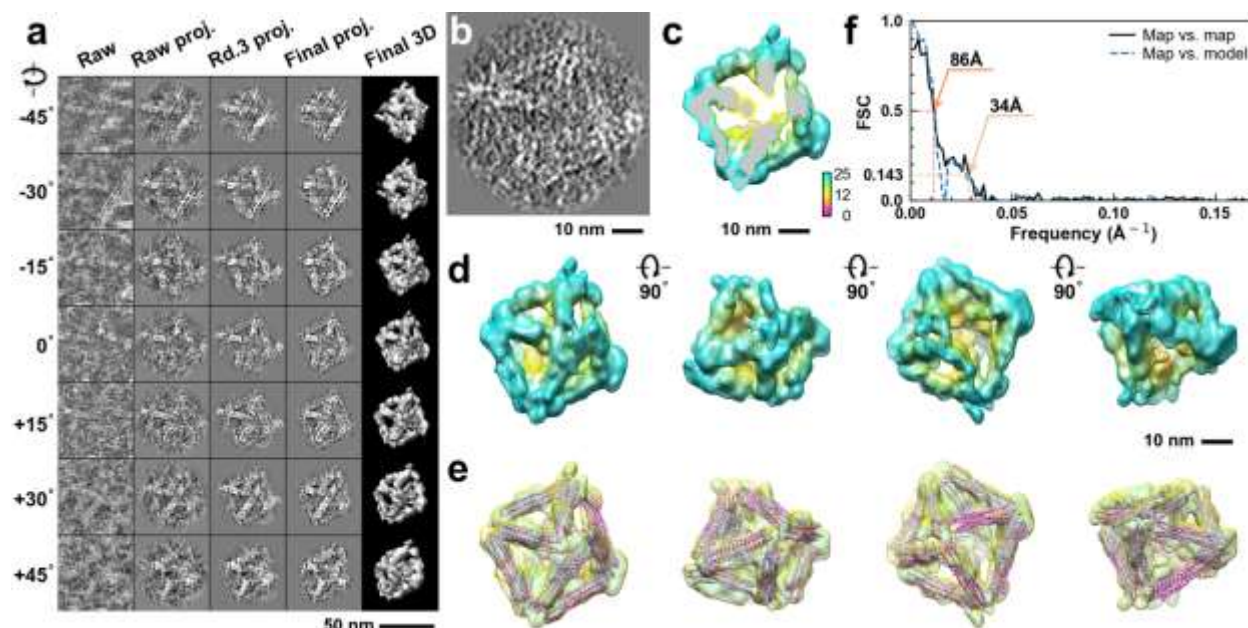

**Supplementary Fig. 312: IPET 3D reconstruction and model fitting of an individual unit-cell particle (Index: 304) within a 2D lattice with 0% ferritin loading.** **a**, Seven representative tilt images of a single unit-cell particle are shown in the first column (from left). The tilt images are aligned to a common center using IPET through iterative refinement. The projections of the raw, intermediate, and final 3D reconstruction at the corresponding angles are displayed in the subsequent four columns. **b**, A central cross-section (~23 nm thick) of the final reconstruction before masking is applied. **c**, 3D views of the central cross-section. **d**, Final 3D density map of this particle, viewed from four perpendicular directions. **e**, Final 3D reconstruction superimposed with the fitted model, viewed from four perpendicular directions. **f**, FSC analyses of the final map resolution using two methods: map-map FSC, where each map is reconstructed from one half of the images (even vs. odd tilt angle indices), and map-model FSC, where the model map is generated from the fitted model. Resolution assessments are provided based on tilt-based map-map and map-model FSC analyses at thresholds of FSC=0.5 and 0.143, respectively.

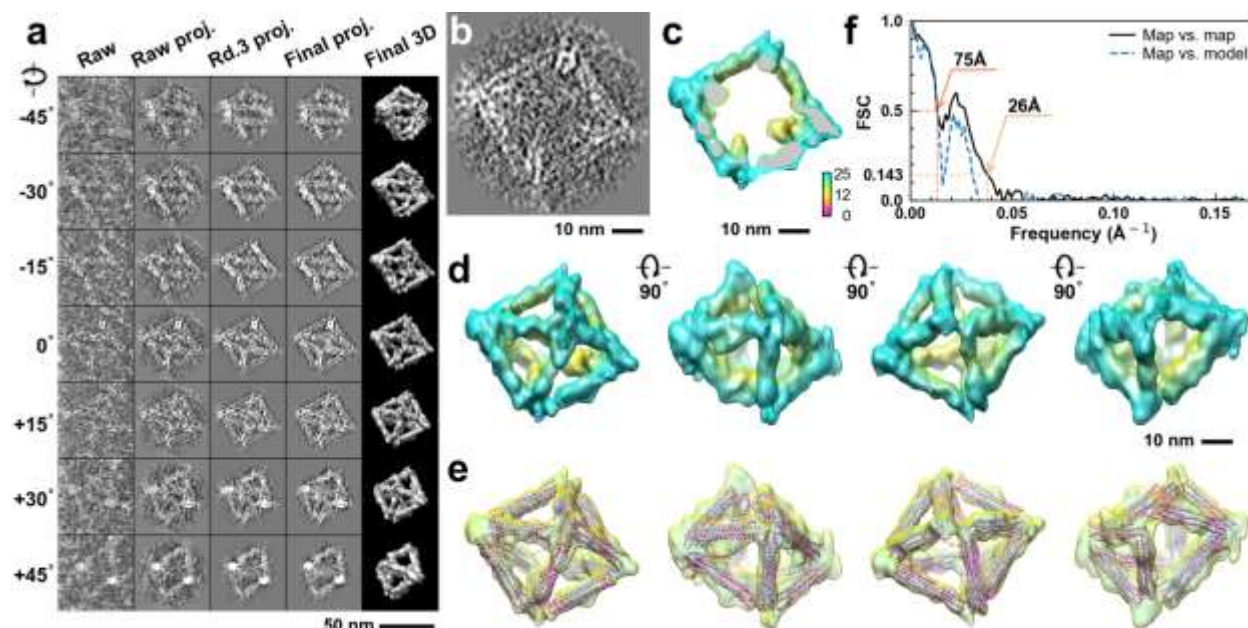

**Supplementary Fig. 313: IPET 3D reconstruction and model fitting of an individual unit-cell particle (Index: 305) within a 2D lattice with 0% ferritin loading.** **a**, Seven representative tilt images of a single unit-cell particle are shown in the first column (from left). The tilt images are aligned to a common center using IPET through iterative refinement. The projections of the raw, intermediate, and final 3D reconstruction at the corresponding angles are displayed in the subsequent four columns. **b**, A central cross-section (~23 nm thick) of the final reconstruction before masking is applied. **c**, 3D views of the central cross-section. **d**, Final 3D density map of this particle, viewed from four perpendicular directions. **e**, Final 3D reconstruction superimposed with the fitted model, viewed from four perpendicular directions. **f**, FSC analyses of the final map resolution using two methods: map-map FSC, where each map is reconstructed from one half of the images (even vs. odd tilt angle indices), and map-model FSC, where the model map is generated from the fitted model. Resolution assessments are provided based on tilt-based map-map and map-model FSC analyses at thresholds of FSC=0.5 and 0.143, respectively.



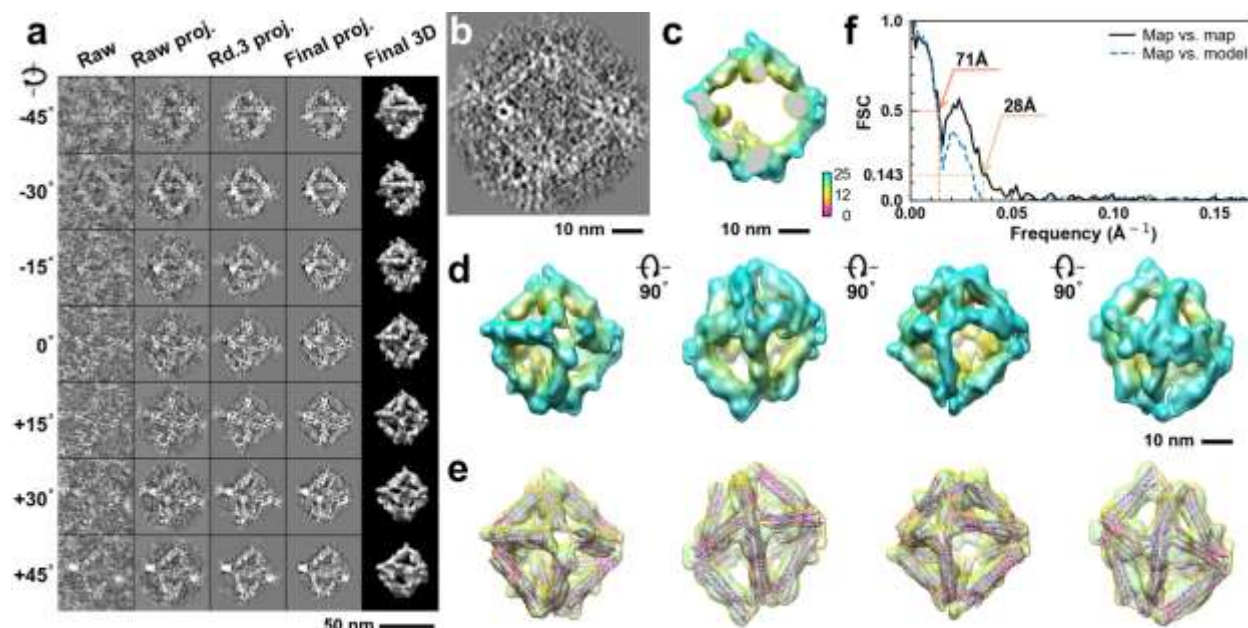

**Supplementary Fig. 314: IPET 3D reconstruction and model fitting of an individual unit-cell particle (Index: 306) within a 2D lattice with 0% ferritin loading.** **a**, Seven representative tilt images of a single unit-cell particle are shown in the first column (from left). The tilt images are aligned to a common center using IPET through iterative refinement. The projections of the raw, intermediate, and final 3D reconstruction at the corresponding angles are displayed in the subsequent four columns. **b**, A central cross-section (~23 nm thick) of the final reconstruction before masking is applied. **c**, 3D views of the central cross-section. **d**, Final 3D density map of this particle, viewed from four perpendicular directions. **e**, Final 3D reconstruction superimposed with the fitted model, viewed from four perpendicular directions. **f**, FSC analyses of the final map resolution using two methods: map-map FSC, where each map is reconstructed from one half of the images (even vs. odd tilt angle indices), and map-model FSC, where the model map is generated from the fitted model. Resolution assessments are provided based on tilt-based map-map and map-model FSC analyses at thresholds of FSC=0.5 and 0.143, respectively.

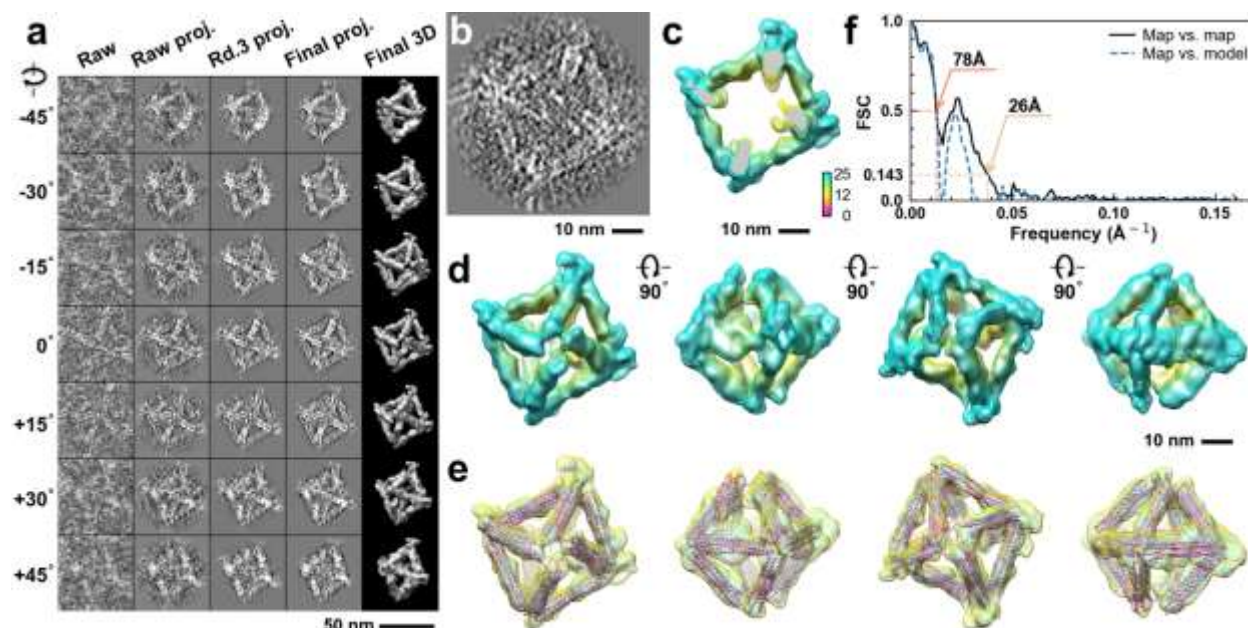

**Supplementary Fig. 315: IPET 3D reconstruction and model fitting of an individual unit-cell particle (Index: 307) within a 2D lattice with 0% ferritin loading.** **a**, Seven representative tilt images of a single unit-cell particle are shown in the first column (from left). The tilt images are aligned to a common center using IPET through iterative refinement. The projections of the raw, intermediate, and final 3D reconstruction at the corresponding angles are displayed in the subsequent four columns. **b**, A central cross-section (~23 nm thick) of the final reconstruction before masking is applied. **c**, 3D views of the central cross-section. **d**, Final 3D density map of this particle, viewed from four perpendicular directions. **e**, Final 3D reconstruction superimposed with the fitted model, viewed from four perpendicular directions. **f**, FSC analyses of the final map resolution using two methods: map-map FSC, where each map is reconstructed from one half of the images (even vs. odd tilt angle indices), and map-model FSC, where the model map is generated from the fitted model. Resolution assessments are provided based on tilt-based map-map and map-model FSC analyses at thresholds of FSC=0.5 and 0.143, respectively.

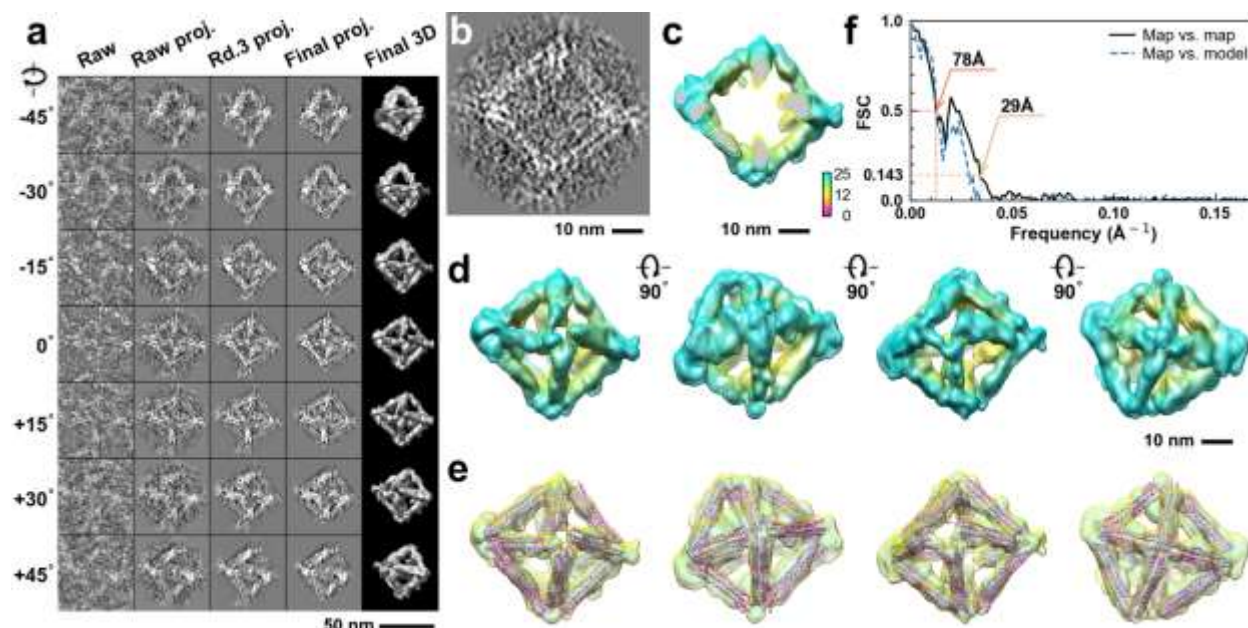

**Supplementary Fig. 316: IPET 3D reconstruction and model fitting of an individual unit-cell particle (Index: 308) within a 2D lattice with 0% ferritin loading.** **a**, Seven representative tilt images of a single unit-cell particle are shown in the first column (from left). The tilt images are aligned to a common center using IPET through iterative refinement. The projections of the raw, intermediate, and final 3D reconstruction at the corresponding angles are displayed in the subsequent four columns. **b**, A central cross-section (~23 nm thick) of the final reconstruction before masking is applied. **c**, 3D views of the central cross-section. **d**, Final 3D density map of this particle, viewed from four perpendicular directions. **e**, Final 3D reconstruction superimposed with the fitted model, viewed from four perpendicular directions. **f**, FSC analyses of the final map resolution using two methods: map-map FSC, where each map is reconstructed from one half of the images (even vs. odd tilt angle indices), and map-model FSC, where the model map is generated from the fitted model. Resolution assessments are provided based on tilt-based map-map and map-model FSC analyses at thresholds of FSC=0.5 and 0.143, respectively.

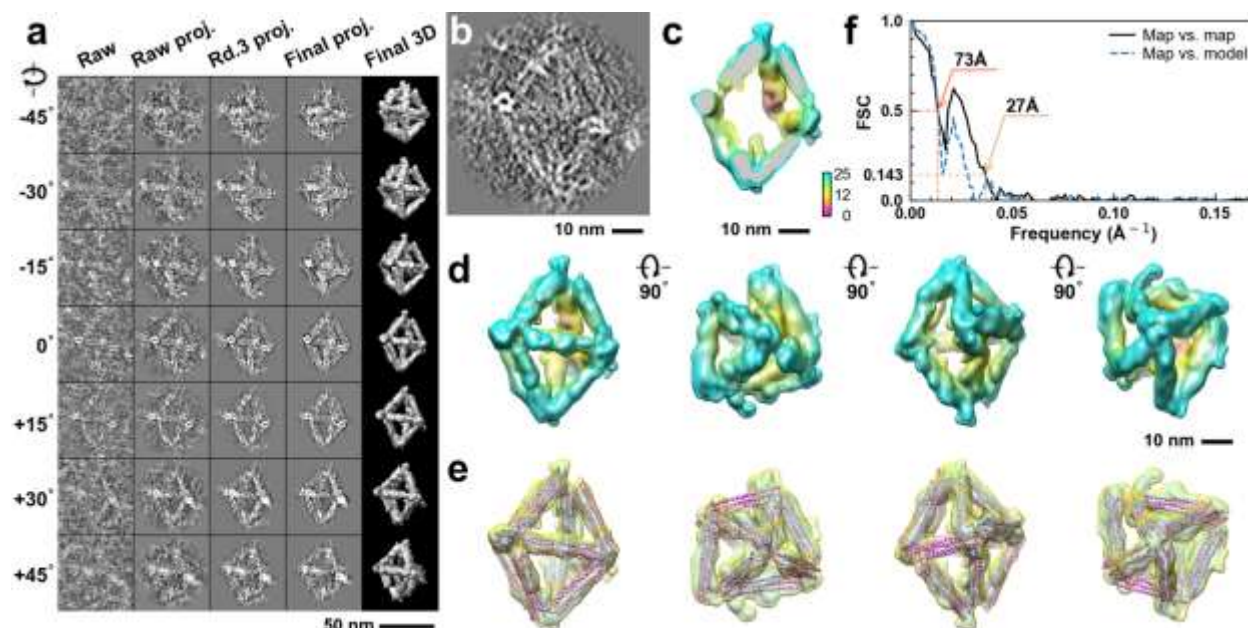

**Supplementary Fig. 317: IPET 3D reconstruction and model fitting of an individual unit-cell particle (Index: 309) within a 2D lattice with 0% ferritin loading.** **a**, Seven representative tilt images of a single unit-cell particle are shown in the first column (from left). The tilt images are aligned to a common center using IPET through iterative refinement. The projections of the raw, intermediate, and final 3D reconstruction at the corresponding angles are displayed in the subsequent four columns. **b**, A central cross-section (~23 nm thick) of the final reconstruction before masking is applied. **c**, 3D views of the central cross-section. **d**, Final 3D density map of this particle, viewed from four perpendicular directions. **e**, Final 3D reconstruction superimposed with the fitted model, viewed from four perpendicular directions. **f**, FSC analyses of the final map resolution using two methods: map-map FSC, where each map is reconstructed from one half of the images (even vs. odd tilt angle indices), and map-model FSC, where the model map is generated from the fitted model. Resolution assessments are provided based on tilt-based map-map and map-model FSC analyses at thresholds of FSC=0.5 and 0.143, respectively.



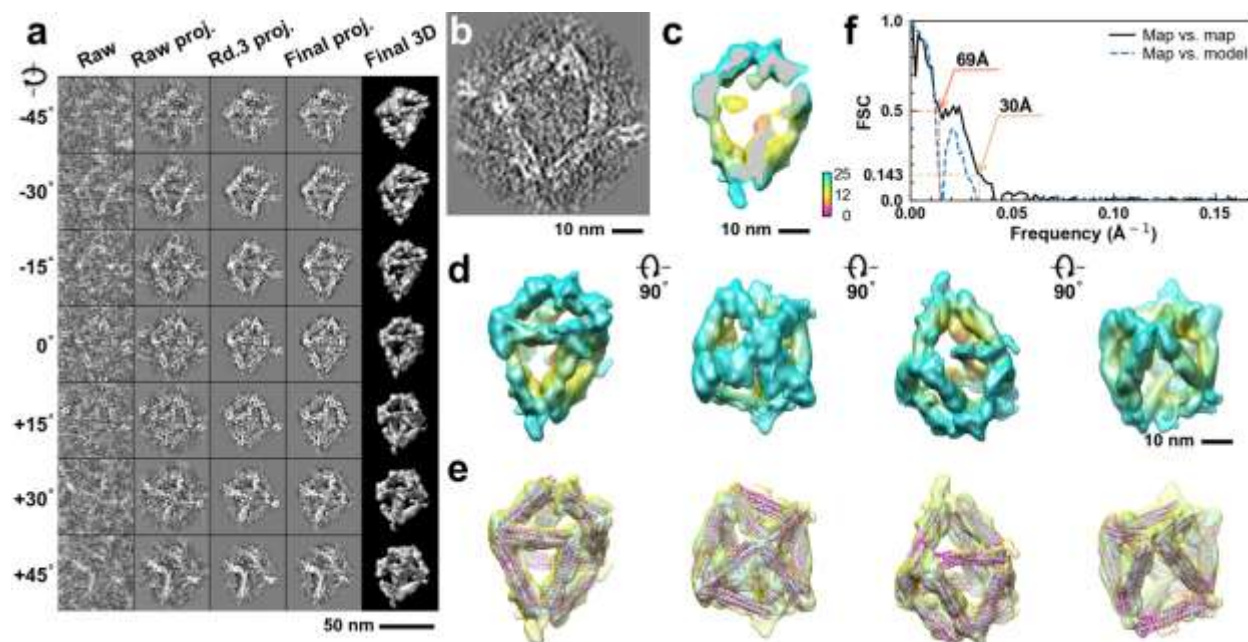

**Supplementary Fig. 318: IPET 3D reconstruction and model fitting of an individual unit-cell particle (Index: 310) within a 2D lattice with 0% ferritin loading.** **a**, Seven representative tilt images of a single unit-cell particle are shown in the first column (from left). The tilt images are aligned to a common center using IPET through iterative refinement. The projections of the raw, intermediate, and final 3D reconstruction at the corresponding angles are displayed in the subsequent four columns. **b**, A central cross-section (~23 nm thick) of the final reconstruction before masking is applied. **c**, 3D views of the central cross-section. **d**, Final 3D density map of this particle, viewed from four perpendicular directions. **e**, Final 3D reconstruction superimposed with the fitted model, viewed from four perpendicular directions. **f**, FSC analyses of the final map resolution using two methods: map-map FSC, where each map is reconstructed from one half of the images (even vs. odd tilt angle indices), and map-model FSC, where the model map is generated from the fitted model. Resolution assessments are provided based on tilt-based map-map and map-model FSC analyses at thresholds of FSC=0.5 and 0.143, respectively.

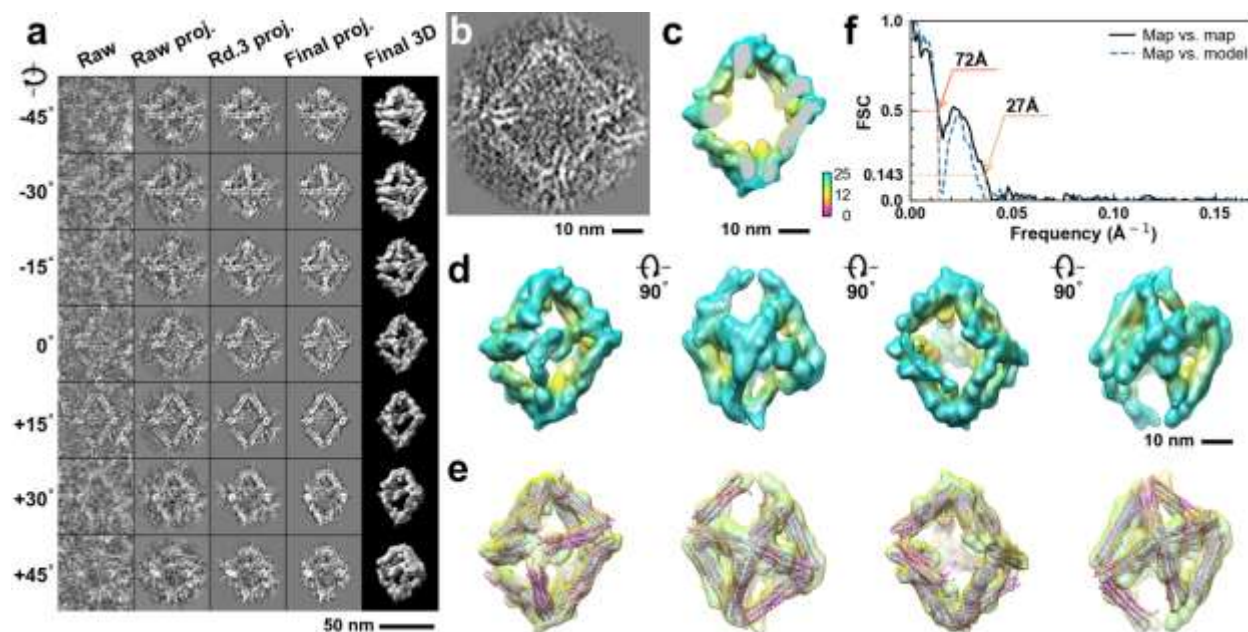

**Supplementary Fig. 319: IPET 3D reconstruction and model fitting of an individual unit-cell particle (Index: 311) within a 2D lattice with 0% ferritin loading.** **a**, Seven representative tilt images of a single unit-cell particle are shown in the first column (from left). The tilt images are aligned to a common center using IPET through iterative refinement. The projections of the raw, intermediate, and final 3D reconstruction at the corresponding angles are displayed in the subsequent four columns. **b**, A central cross-section (~23 nm thick) of the final reconstruction before masking is applied. **c**, 3D views of the central cross-section. **d**, Final 3D density map of this particle, viewed from four perpendicular directions. **e**, Final 3D reconstruction superimposed with the fitted model, viewed from four perpendicular directions. **f**, FSC analyses of the final map resolution using two methods: map-map FSC, where each map is reconstructed from one half of the images (even vs. odd tilt angle indices), and map-model FSC, where the model map is generated from the fitted model. Resolution assessments are provided based on tilt-based map-map and map-model FSC analyses at thresholds of FSC=0.5 and 0.143, respectively.

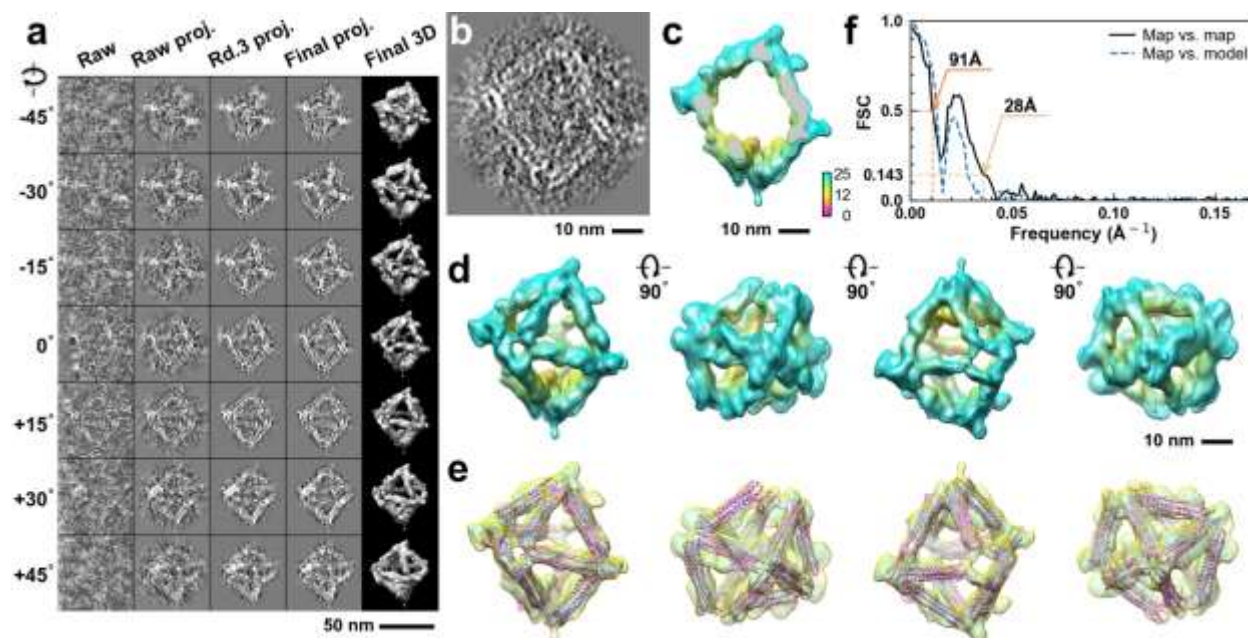

**Supplementary Fig. 320: IPET 3D reconstruction and model fitting of an individual unit-cell particle (Index: 312) within a 2D lattice with 0% ferritin loading.** **a**, Seven representative tilt images of a single unit-cell particle are shown in the first column (from left). The tilt images are aligned to a common center using IPET through iterative refinement. The projections of the raw, intermediate, and final 3D reconstruction at the corresponding angles are displayed in the subsequent four columns. **b**, A central cross-section (~23 nm thick) of the final reconstruction before masking is applied. **c**, 3D views of the central cross-section. **d**, Final 3D density map of this particle, viewed from four perpendicular directions. **e**, Final 3D reconstruction superimposed with the fitted model, viewed from four perpendicular directions. **f**, FSC analyses of the final map resolution using two methods: map-map FSC, where each map is reconstructed from one half of the images (even vs. odd tilt angle indices), and map-model FSC, where the model map is generated from the fitted model. Resolution assessments are provided based on tilt-based map-map and map-model FSC analyses at thresholds of FSC=0.5 and 0.143, respectively.

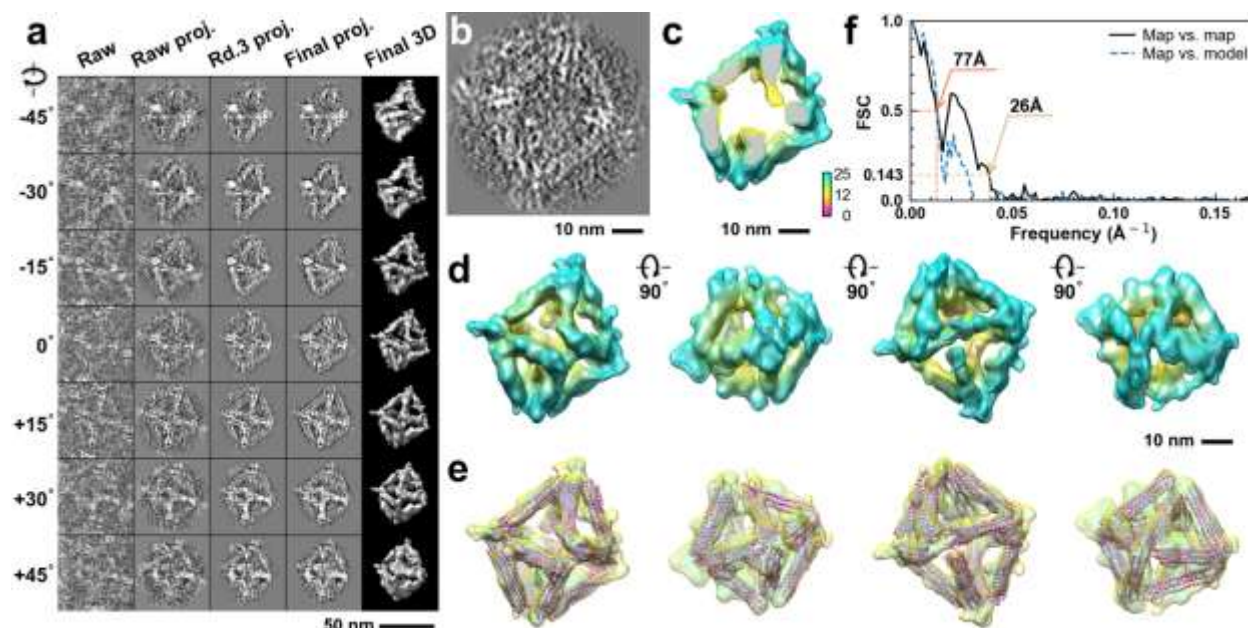

**Supplementary Fig. 321: IPET 3D reconstruction and model fitting of an individual unit-cell particle (Index: 313) within a 2D lattice with 0% ferritin loading.** **a**, Seven representative tilt images of a single unit-cell particle are shown in the first column (from left). The tilt images are aligned to a common center using IPET through iterative refinement. The projections of the raw, intermediate, and final 3D reconstruction at the corresponding angles are displayed in the subsequent four columns. **b**, A central cross-section (~23 nm thick) of the final reconstruction before masking is applied. **c**, 3D views of the central cross-section. **d**, Final 3D density map of this particle, viewed from four perpendicular directions. **e**, Final 3D reconstruction superimposed with the fitted model, viewed from four perpendicular directions. **f**, FSC analyses of the final map resolution using two methods: map-map FSC, where each map is reconstructed from one half of the images (even vs. odd tilt angle indices), and map-model FSC, where the model map is generated from the fitted model. Resolution assessments are provided based on tilt-based map-map and map-model FSC analyses at thresholds of FSC=0.5 and 0.143, respectively.



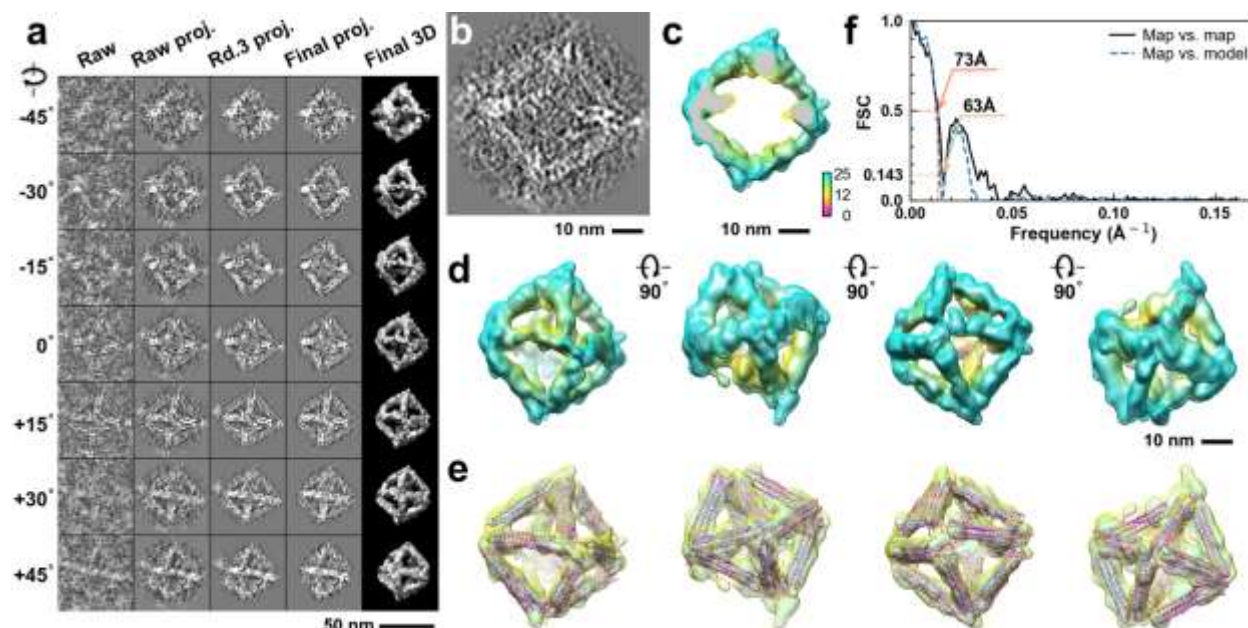

**Supplementary Fig. 322: IPET 3D reconstruction and model fitting of an individual unit-cell particle (Index: 314) within a 2D lattice with 0% ferritin loading.** **a**, Seven representative tilt images of a single unit-cell particle are shown in the first column (from left). The tilt images are aligned to a common center using IPET through iterative refinement. The projections of the raw, intermediate, and final 3D reconstruction at the corresponding angles are displayed in the subsequent four columns. **b**, A central cross-section (~23 nm thick) of the final reconstruction before masking is applied. **c**, 3D views of the central cross-section. **d**, Final 3D density map of this particle, viewed from four perpendicular directions. **e**, Final 3D reconstruction superimposed with the fitted model, viewed from four perpendicular directions. **f**, FSC analyses of the final map resolution using two methods: map-map FSC, where each map is reconstructed from one half of the images (even vs. odd tilt angle indices), and map-model FSC, where the model map is generated from the fitted model. Resolution assessments are provided based on tilt-based map-map and map-model FSC analyses at thresholds of FSC=0.5 and 0.143, respectively.

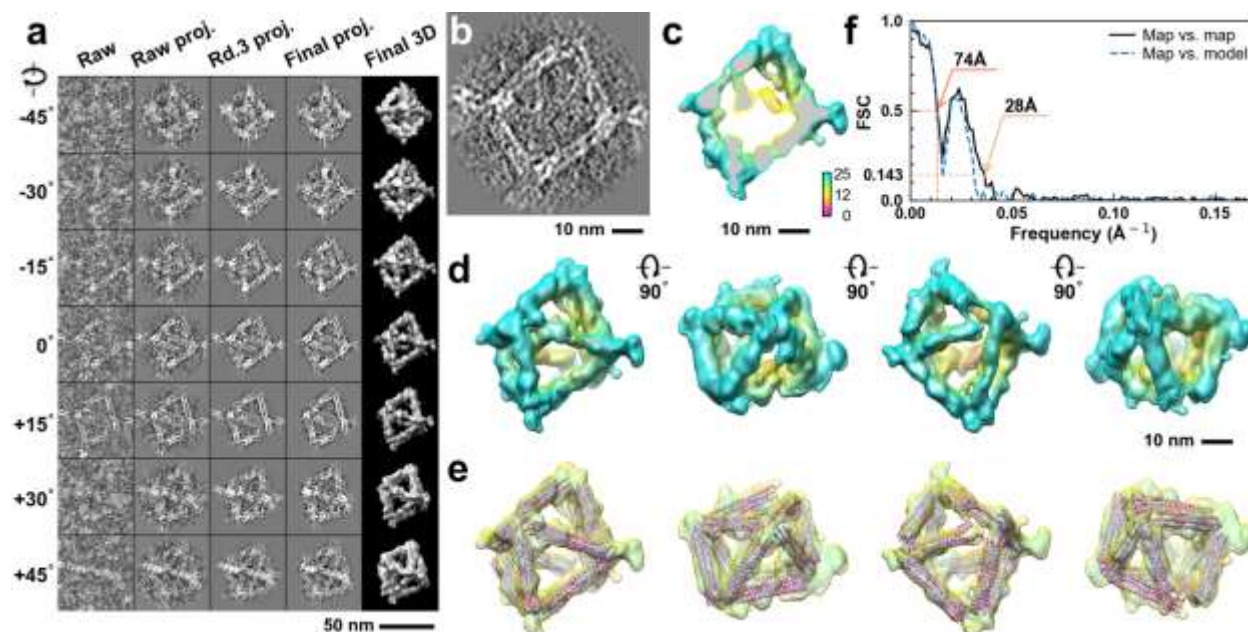

**Supplementary Fig. 323: IPET 3D reconstruction and model fitting of an individual unit-cell particle (Index: 315) within a 2D lattice with 0% ferritin loading.** **a**, Seven representative tilt images of a single unit-cell particle are shown in the first column (from left). The tilt images are aligned to a common center using IPET through iterative refinement. The projections of the raw, intermediate, and final 3D reconstruction at the corresponding angles are displayed in the subsequent four columns. **b**, A central cross-section (~23 nm thick) of the final reconstruction before masking is applied. **c**, 3D views of the central cross-section. **d**, Final 3D density map of this particle, viewed from four perpendicular directions. **e**, Final 3D reconstruction superimposed with the fitted model, viewed from four perpendicular directions. **f**, FSC analyses of the final map resolution using two methods: map-map FSC, where each map is reconstructed from one half of the images (even vs. odd tilt angle indices), and map-model FSC, where the model map is generated from the fitted model. Resolution assessments are provided based on tilt-based map-map and map-model FSC analyses at thresholds of FSC=0.5 and 0.143, respectively.

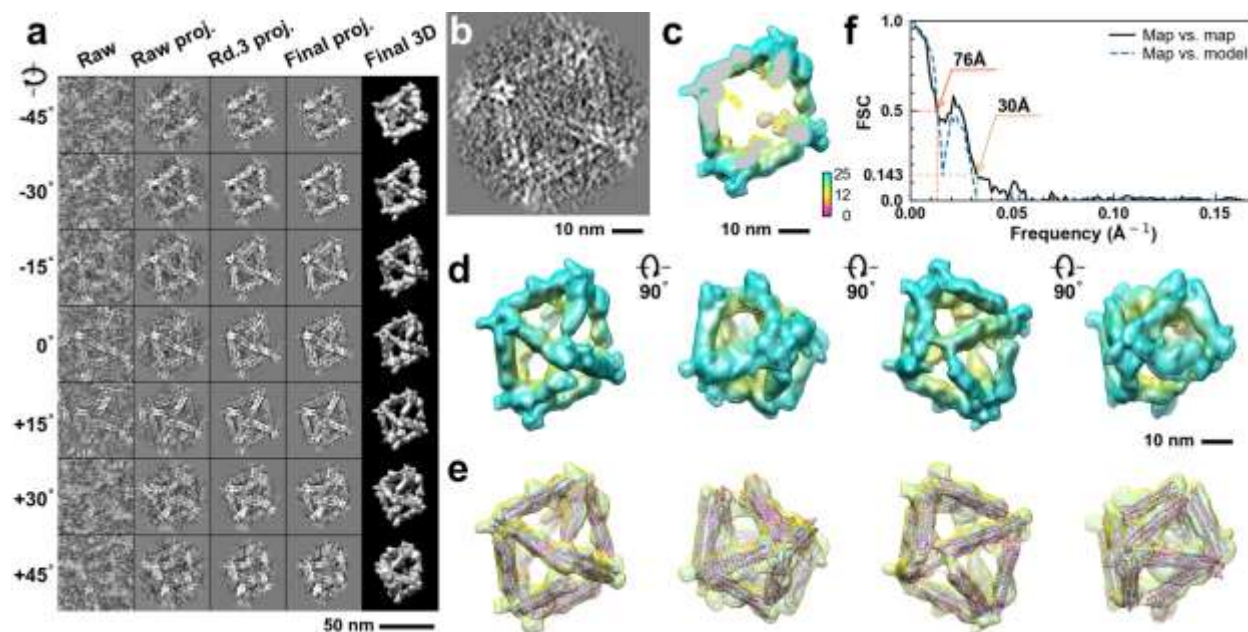

**Supplementary Fig. 324: IPET 3D reconstruction and model fitting of an individual unit-cell particle (Index: 316) within a 2D lattice with 0% ferritin loading.** **a**, Seven representative tilt images of a single unit-cell particle are shown in the first column (from left). The tilt images are aligned to a common center using IPET through iterative refinement. The projections of the raw, intermediate, and final 3D reconstruction at the corresponding angles are displayed in the subsequent four columns. **b**, A central cross-section (~23 nm thick) of the final reconstruction before masking is applied. **c**, 3D views of the central cross-section. **d**, Final 3D density map of this particle, viewed from four perpendicular directions. **e**, Final 3D reconstruction superimposed with the fitted model, viewed from four perpendicular directions. **f**, FSC analyses of the final map resolution using two methods: map-map FSC, where each map is reconstructed from one half of the images (even vs. odd tilt angle indices), and map-model FSC, where the model map is generated from the fitted model. Resolution assessments are provided based on tilt-based map-map and map-model FSC analyses at thresholds of FSC=0.5 and 0.143, respectively.

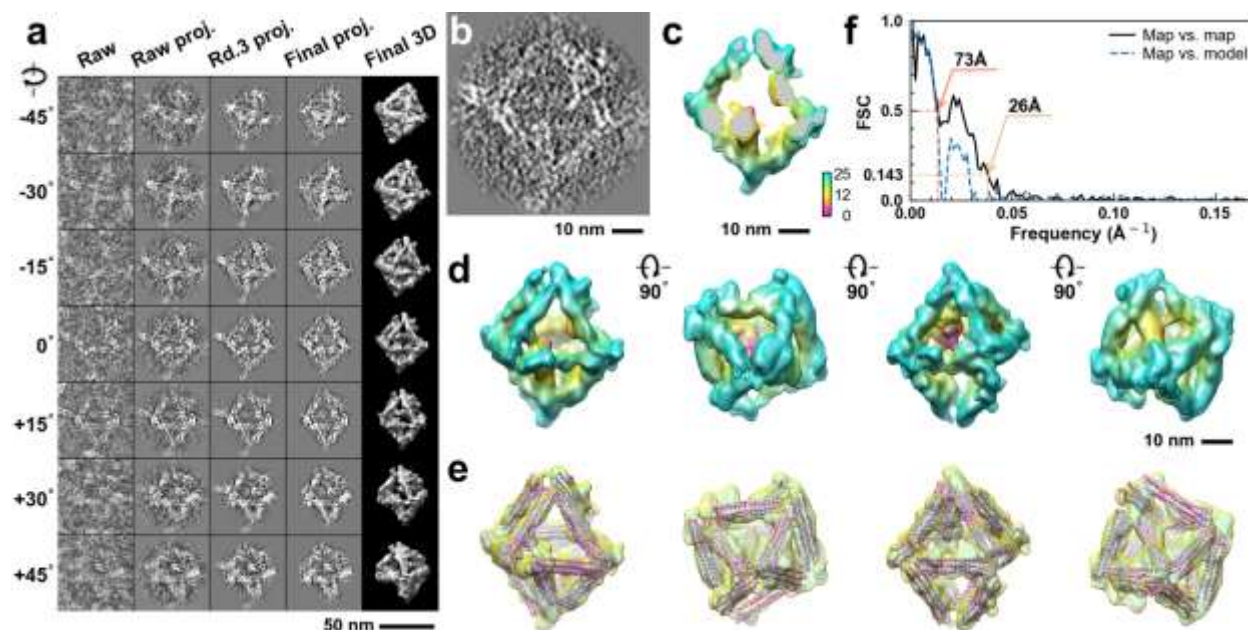

**Supplementary Fig. 325: IPET 3D reconstruction and model fitting of an individual unit-cell particle (Index: 317) within a 2D lattice with 0% ferritin loading.** **a**, Seven representative tilt images of a single unit-cell particle are shown in the first column (from left). The tilt images are aligned to a common center using IPET through iterative refinement. The projections of the raw, intermediate, and final 3D reconstruction at the corresponding angles are displayed in the subsequent four columns. **b**, A central cross-section (~23 nm thick) of the final reconstruction before masking is applied. **c**, 3D views of the central cross-section. **d**, Final 3D density map of this particle, viewed from four perpendicular directions. **e**, Final 3D reconstruction superimposed with the fitted model, viewed from four perpendicular directions. **f**, FSC analyses of the final map resolution using two methods: map-map FSC, where each map is reconstructed from one half of the images (even vs. odd tilt angle indices), and map-model FSC, where the model map is generated from the fitted model. Resolution assessments are provided based on tilt-based map-map and map-model FSC analyses at thresholds of FSC=0.5 and 0.143, respectively.



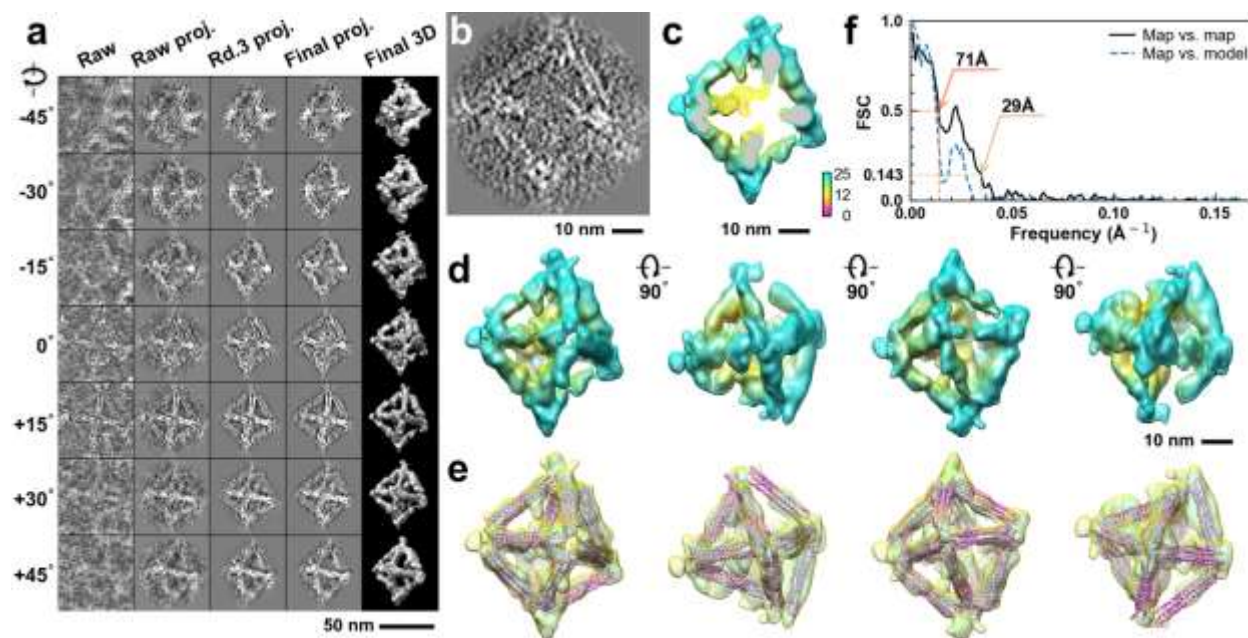

**Supplementary Fig. 326: IPET 3D reconstruction and model fitting of an individual unit-cell particle (Index: 318) within a 2D lattice with 0% ferritin loading.** **a**, Seven representative tilt images of a single unit-cell particle are shown in the first column (from left). The tilt images are aligned to a common center using IPET through iterative refinement. The projections of the raw, intermediate, and final 3D reconstruction at the corresponding angles are displayed in the subsequent four columns. **b**, A central cross-section (~23 nm thick) of the final reconstruction before masking is applied. **c**, 3D views of the central cross-section. **d**, Final 3D density map of this particle, viewed from four perpendicular directions. **e**, Final 3D reconstruction superimposed with the fitted model, viewed from four perpendicular directions. **f**, FSC analyses of the final map resolution using two methods: map-map FSC, where each map is reconstructed from one half of the images (even vs. odd tilt angle indices), and map-model FSC, where the model map is generated from the fitted model. Resolution assessments are provided based on tilt-based map-map and map-model FSC analyses at thresholds of FSC=0.5 and 0.143, respectively.

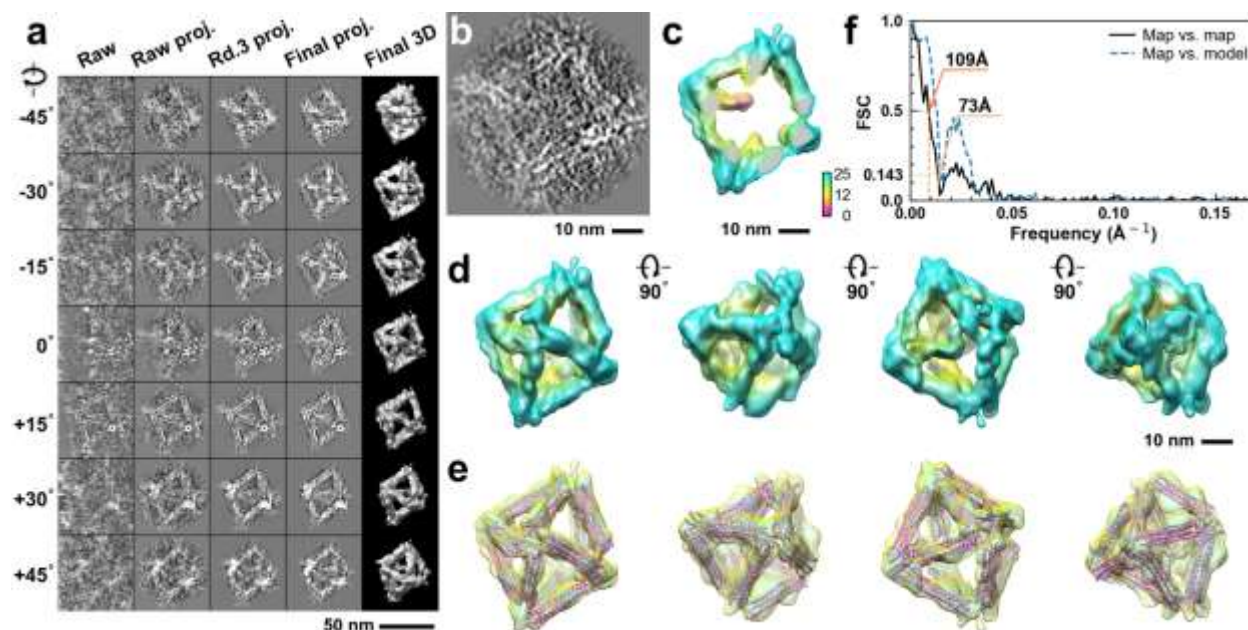

**Supplementary Fig. 327: IPET 3D reconstruction and model fitting of an individual unit-cell particle (Index: 319) within a 2D lattice with 0% ferritin loading.** **a**, Seven representative tilt images of a single unit-cell particle are shown in the first column (from left). The tilt images are aligned to a common center using IPET through iterative refinement. The projections of the raw, intermediate, and final 3D reconstruction at the corresponding angles are displayed in the subsequent four columns. **b**, A central cross-section (~23 nm thick) of the final reconstruction before masking is applied. **c**, 3D views of the central cross-section. **d**, Final 3D density map of this particle, viewed from four perpendicular directions. **e**, Final 3D reconstruction superimposed with the fitted model, viewed from four perpendicular directions. **f**, FSC analyses of the final map resolution using two methods: map-map FSC, where each map is reconstructed from one half of the images (even vs. odd tilt angle indices), and map-model FSC, where the model map is generated from the fitted model. Resolution assessments are provided based on tilt-based map-map and map-model FSC analyses at thresholds of FSC=0.5 and 0.143, respectively.

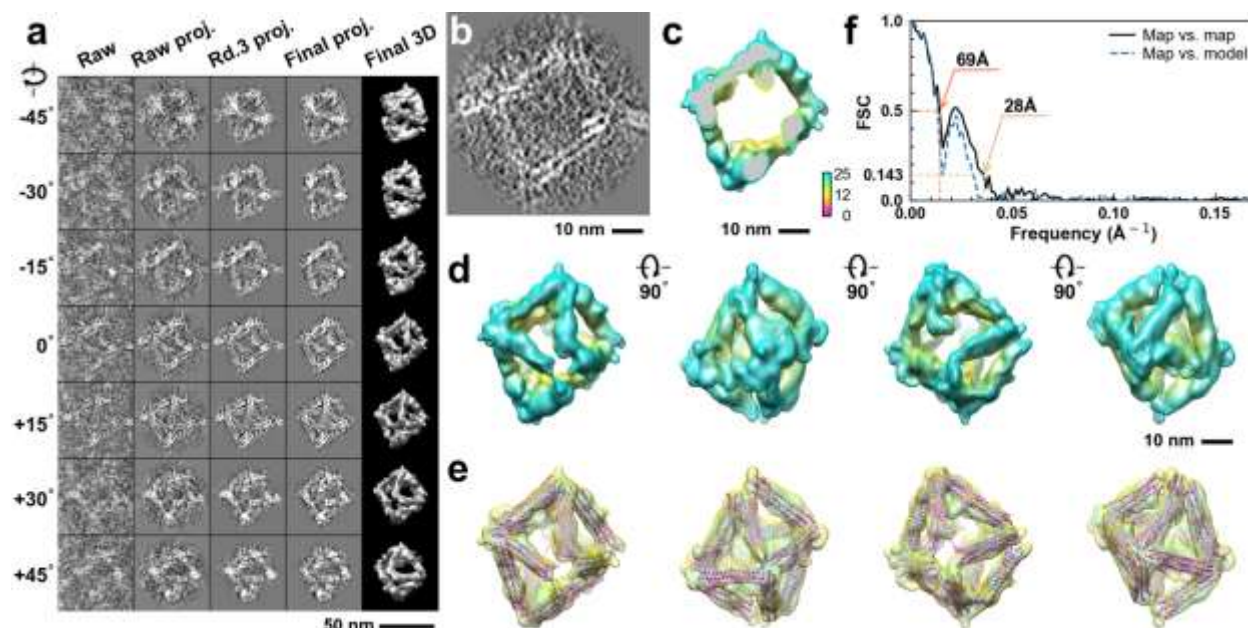

**Supplementary Fig. 328: IPET 3D reconstruction and model fitting of an individual unit-cell particle (Index: 320) within a 2D lattice with 0% ferritin loading.** **a**, Seven representative tilt images of a single unit-cell particle are shown in the first column (from left). The tilt images are aligned to a common center using IPET through iterative refinement. The projections of the raw, intermediate, and final 3D reconstruction at the corresponding angles are displayed in the subsequent four columns. **b**, A central cross-section (~23 nm thick) of the final reconstruction before masking is applied. **c**, 3D views of the central cross-section. **d**, Final 3D density map of this particle, viewed from four perpendicular directions. **e**, Final 3D reconstruction superimposed with the fitted model, viewed from four perpendicular directions. **f**, FSC analyses of the final map resolution using two methods: map-map FSC, where each map is reconstructed from one half of the images (even vs. odd tilt angle indices), and map-model FSC, where the model map is generated from the fitted model. Resolution assessments are provided based on tilt-based map-map and map-model FSC analyses at thresholds of FSC=0.5 and 0.143, respectively.

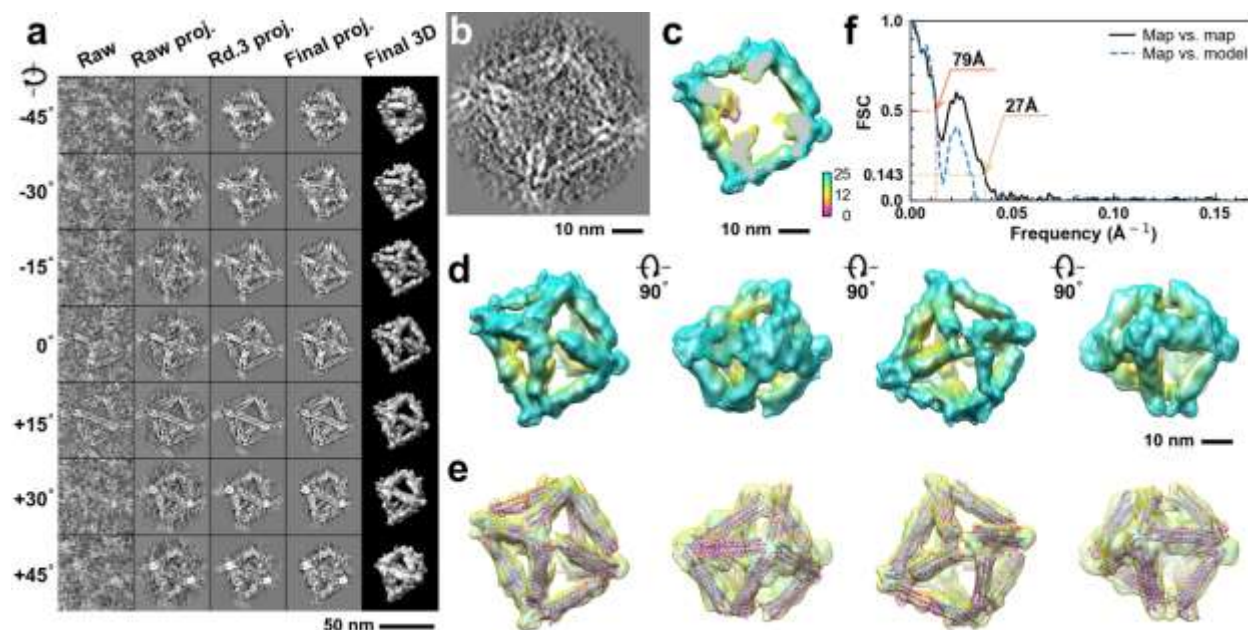

**Supplementary Fig. 329: IPET 3D reconstruction and model fitting of an individual unit-cell particle (Index: 321) within a 2D lattice with 0% ferritin loading.** **a**, Seven representative tilt images of a single unit-cell particle are shown in the first column (from left). The tilt images are aligned to a common center using IPET through iterative refinement. The projections of the raw, intermediate, and final 3D reconstruction at the corresponding angles are displayed in the subsequent four columns. **b**, A central cross-section (~23 nm thick) of the final reconstruction before masking is applied. **c**, 3D views of the central cross-section. **d**, Final 3D density map of this particle, viewed from four perpendicular directions. **e**, Final 3D reconstruction superimposed with the fitted model, viewed from four perpendicular directions. **f**, FSC analyses of the final map resolution using two methods: map-map FSC, where each map is reconstructed from one half of the images (even vs. odd tilt angle indices), and map-model FSC, where the model map is generated from the fitted model. Resolution assessments are provided based on tilt-based map-map and map-model FSC analyses at thresholds of FSC=0.5 and 0.143, respectively.



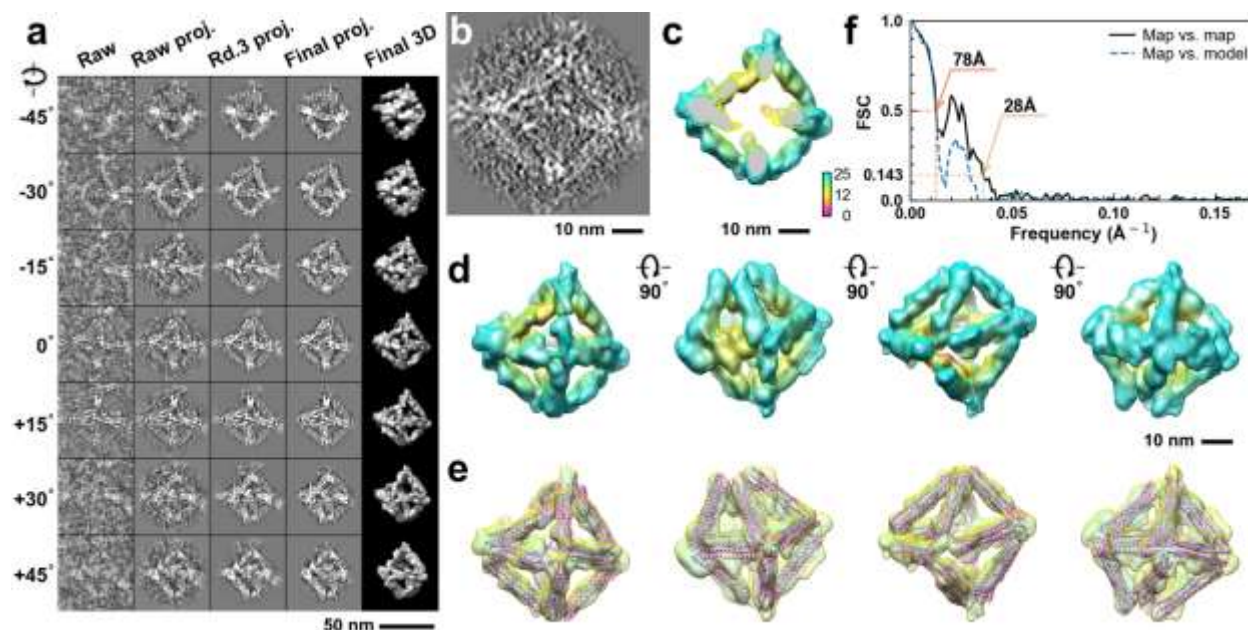

**Supplementary Fig. 330: IPET 3D reconstruction and model fitting of an individual unit-cell particle (Index: 322) within a 2D lattice with 0% ferritin loading.** **a**, Seven representative tilt images of a single unit-cell particle are shown in the first column (from left). The tilt images are aligned to a common center using IPET through iterative refinement. The projections of the raw, intermediate, and final 3D reconstruction at the corresponding angles are displayed in the subsequent four columns. **b**, A central cross-section (~23 nm thick) of the final reconstruction before masking is applied. **c**, 3D views of the central cross-section. **d**, Final 3D density map of this particle, viewed from four perpendicular directions. **e**, Final 3D reconstruction superimposed with the fitted model, viewed from four perpendicular directions. **f**, FSC analyses of the final map resolution using two methods: map-map FSC, where each map is reconstructed from one half of the images (even vs. odd tilt angle indices), and map-model FSC, where the model map is generated from the fitted model. Resolution assessments are provided based on tilt-based map-map and map-model FSC analyses at thresholds of FSC=0.5 and 0.143, respectively.

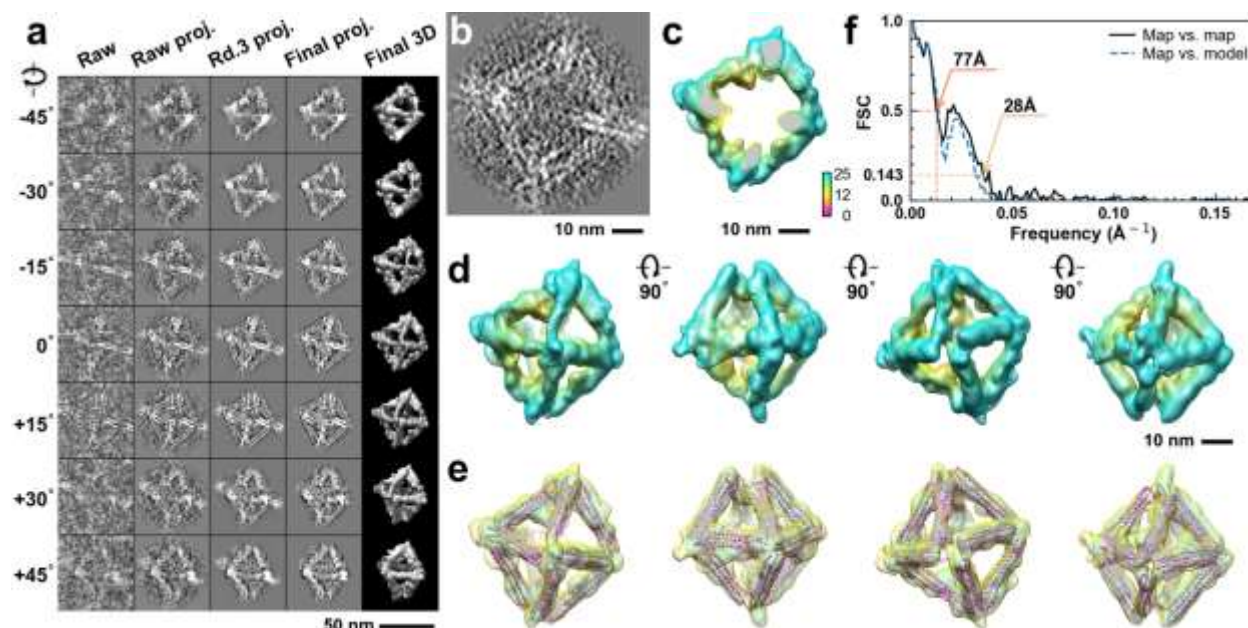

**Supplementary Fig. 331: IPET 3D reconstruction and model fitting of an individual unit-cell particle (Index: 323) within a 2D lattice with 0% ferritin loading.** **a**, Seven representative tilt images of a single unit-cell particle are shown in the first column (from left). The tilt images are aligned to a common center using IPET through iterative refinement. The projections of the raw, intermediate, and final 3D reconstruction at the corresponding angles are displayed in the subsequent four columns. **b**, A central cross-section (~23 nm thick) of the final reconstruction before masking is applied. **c**, 3D views of the central cross-section. **d**, Final 3D density map of this particle, viewed from four perpendicular directions. **e**, Final 3D reconstruction superimposed with the fitted model, viewed from four perpendicular directions. **f**, FSC analyses of the final map resolution using two methods: map-map FSC, where each map is reconstructed from one half of the images (even vs. odd tilt angle indices), and map-model FSC, where the model map is generated from the fitted model. Resolution assessments are provided based on tilt-based map-map and map-model FSC analyses at thresholds of FSC=0.5 and 0.143, respectively.

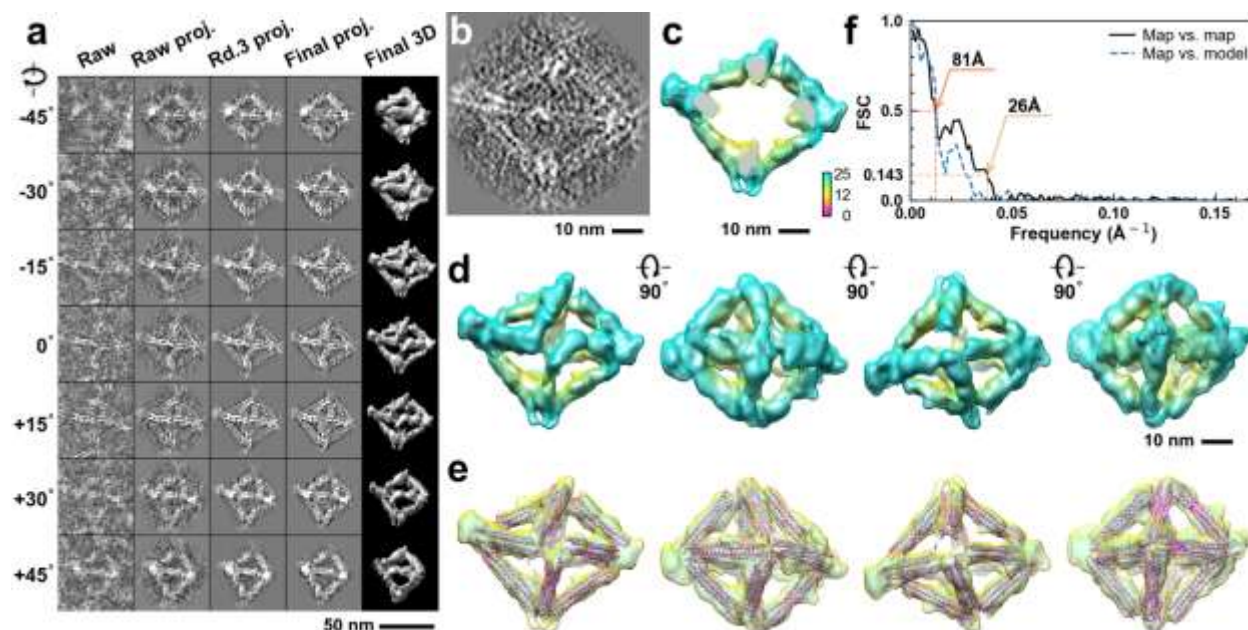

**Supplementary Fig. 332: IPET 3D reconstruction and model fitting of an individual unit-cell particle (Index: 324) within a 2D lattice with 0% ferritin loading.** **a**, Seven representative tilt images of a single unit-cell particle are shown in the first column (from left). The tilt images are aligned to a common center using IPET through iterative refinement. The projections of the raw, intermediate, and final 3D reconstruction at the corresponding angles are displayed in the subsequent four columns. **b**, A central cross-section (~23 nm thick) of the final reconstruction before masking is applied. **c**, 3D views of the central cross-section. **d**, Final 3D density map of this particle, viewed from four perpendicular directions. **e**, Final 3D reconstruction superimposed with the fitted model, viewed from four perpendicular directions. **f**, FSC analyses of the final map resolution using two methods: map-map FSC, where each map is reconstructed from one half of the images (even vs. odd tilt angle indices), and map-model FSC, where the model map is generated from the fitted model. Resolution assessments are provided based on tilt-based map-map and map-model FSC analyses at thresholds of FSC=0.5 and 0.143, respectively.

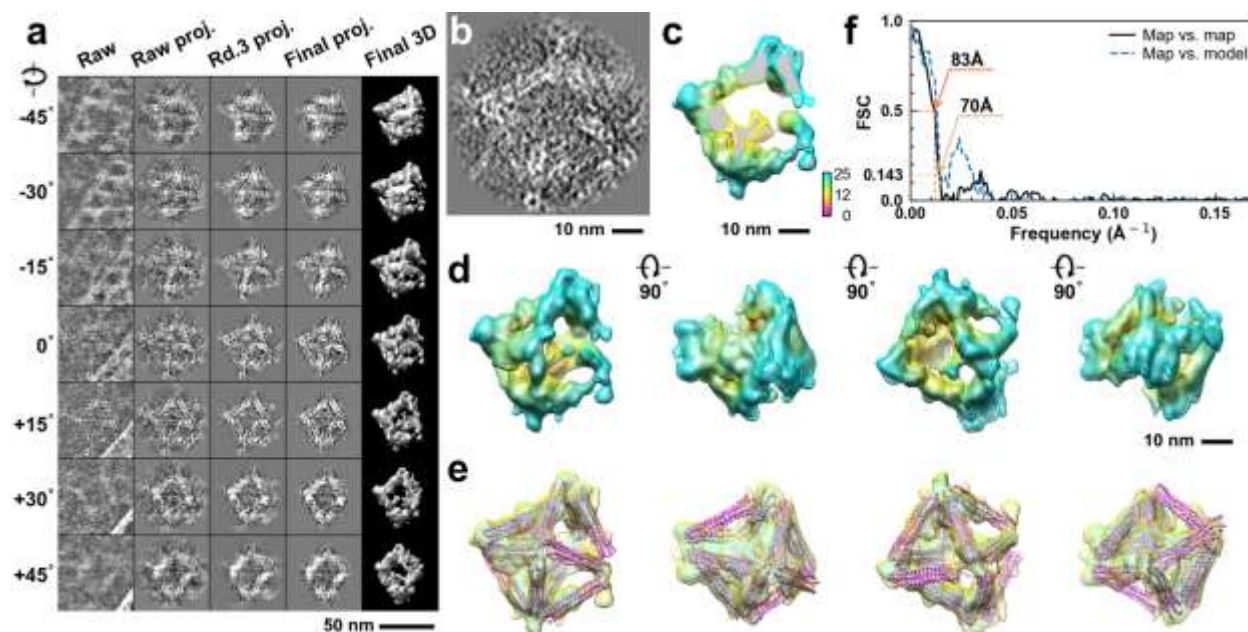

**Supplementary Fig. 333: IPET 3D reconstruction and model fitting of an individual unit-cell particle (Index: 325) within a 2D lattice with 0% ferritin loading.** **a**, Seven representative tilt images of a single unit-cell particle are shown in the first column (from left). The tilt images are aligned to a common center using IPET through iterative refinement. The projections of the raw, intermediate, and final 3D reconstruction at the corresponding angles are displayed in the subsequent four columns. **b**, A central cross-section (~23 nm thick) of the final reconstruction before masking is applied. **c**, 3D views of the central cross-section. **d**, Final 3D density map of this particle, viewed from four perpendicular directions. **e**, Final 3D reconstruction superimposed with the fitted model, viewed from four perpendicular directions. **f**, FSC analyses of the final map resolution using two methods: map-map FSC, where each map is reconstructed from one half of the images (even vs. odd tilt angle indices), and map-model FSC, where the model map is generated from the fitted model. Resolution assessments are provided based on tilt-based map-map and map-model FSC analyses at thresholds of FSC=0.5 and 0.143, respectively.



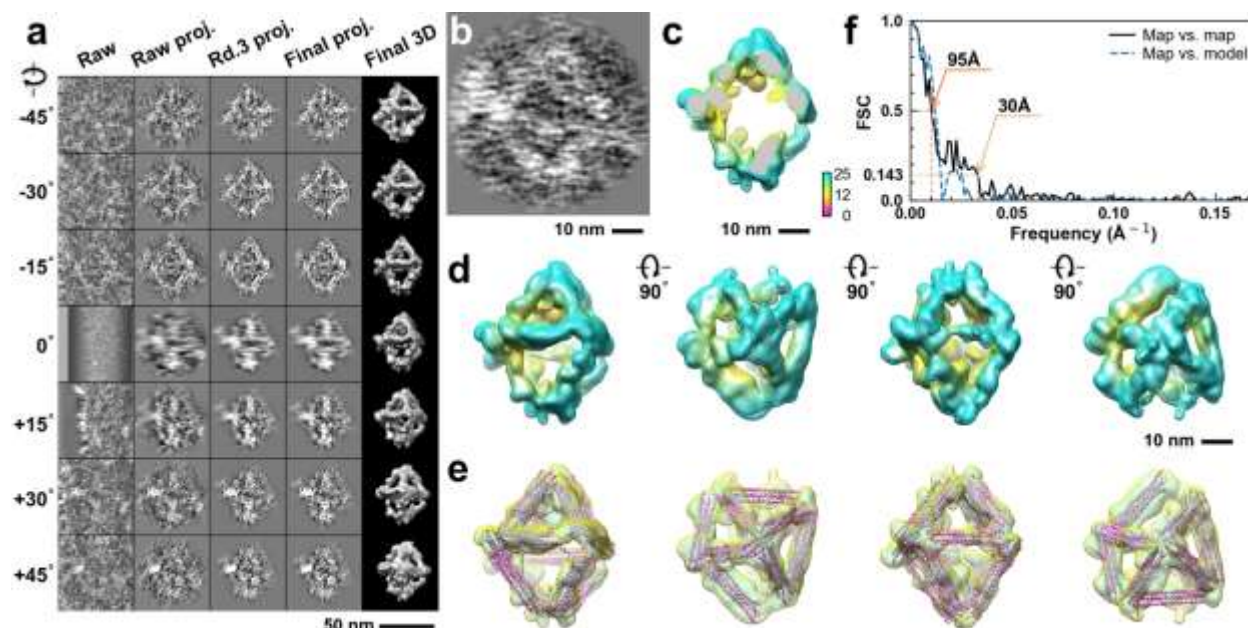

**Supplementary Fig. 334: IPET 3D reconstruction and model fitting of an individual unit-cell particle (Index: 326) within a 2D lattice with 0% ferritin loading.** **a**, Seven representative tilt images of a single unit-cell particle are shown in the first column (from left). The tilt images are aligned to a common center using IPET through iterative refinement. The projections of the raw, intermediate, and final 3D reconstruction at the corresponding angles are displayed in the subsequent four columns. **b**, A central cross-section (~23 nm thick) of the final reconstruction before masking is applied. **c**, 3D views of the central cross-section. **d**, Final 3D density map of this particle, viewed from four perpendicular directions. **e**, Final 3D reconstruction superimposed with the fitted model, viewed from four perpendicular directions. **f**, FSC analyses of the final map resolution using two methods: map-map FSC, where each map is reconstructed from one half of the images (even vs. odd tilt angle indices), and map-model FSC, where the model map is generated from the fitted model. Resolution assessments are provided based on tilt-based map-map and map-model FSC analyses at thresholds of FSC=0.5 and 0.143, respectively.

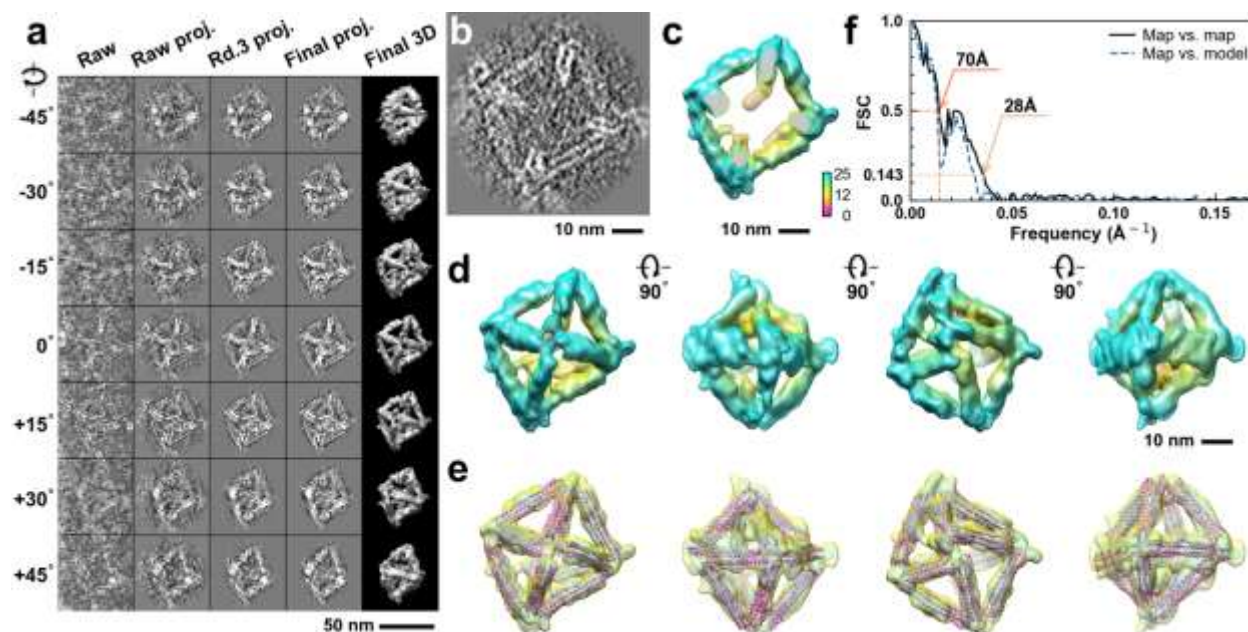

**Supplementary Fig. 335: IPET 3D reconstruction and model fitting of an individual unit-cell particle (Index: 327) within a 2D lattice with 0% ferritin loading.** **a**, Seven representative tilt images of a single unit-cell particle are shown in the first column (from left). The tilt images are aligned to a common center using IPET through iterative refinement. The projections of the raw, intermediate, and final 3D reconstruction at the corresponding angles are displayed in the subsequent four columns. **b**, A central cross-section (~23 nm thick) of the final reconstruction before masking is applied. **c**, 3D views of the central cross-section. **d**, Final 3D density map of this particle, viewed from four perpendicular directions. **e**, Final 3D reconstruction superimposed with the fitted model, viewed from four perpendicular directions. **f**, FSC analyses of the final map resolution using two methods: map-map FSC, where each map is reconstructed from one half of the images (even vs. odd tilt angle indices), and map-model FSC, where the model map is generated from the fitted model. Resolution assessments are provided based on tilt-based map-map and map-model FSC analyses at thresholds of FSC=0.5 and 0.143, respectively.

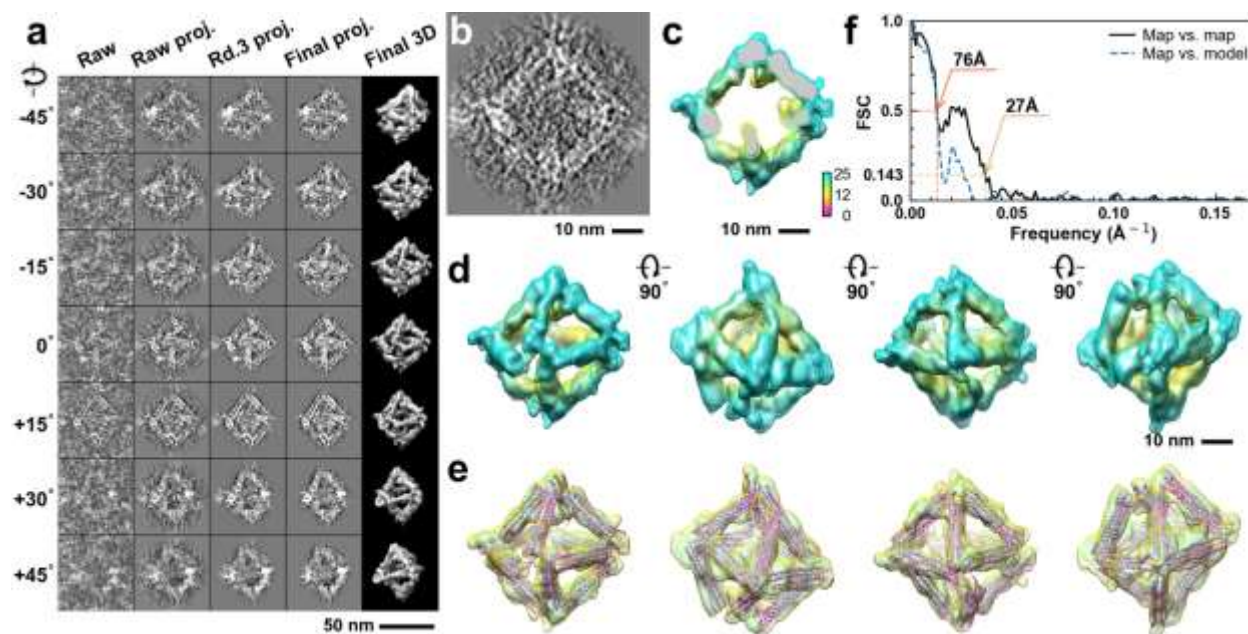

**Supplementary Fig. 336: IPET 3D reconstruction and model fitting of an individual unit-cell particle (Index: 328) within a 2D lattice with 0% ferritin loading.** **a**, Seven representative tilt images of a single unit-cell particle are shown in the first column (from left). The tilt images are aligned to a common center using IPET through iterative refinement. The projections of the raw, intermediate, and final 3D reconstruction at the corresponding angles are displayed in the subsequent four columns. **b**, A central cross-section (~23 nm thick) of the final reconstruction before masking is applied. **c**, 3D views of the central cross-section. **d**, Final 3D density map of this particle, viewed from four perpendicular directions. **e**, Final 3D reconstruction superimposed with the fitted model, viewed from four perpendicular directions. **f**, FSC analyses of the final map resolution using two methods: map-map FSC, where each map is reconstructed from one half of the images (even vs. odd tilt angle indices), and map-model FSC, where the model map is generated from the fitted model. Resolution assessments are provided based on tilt-based map-map and map-model FSC analyses at thresholds of FSC=0.5 and 0.143, respectively.

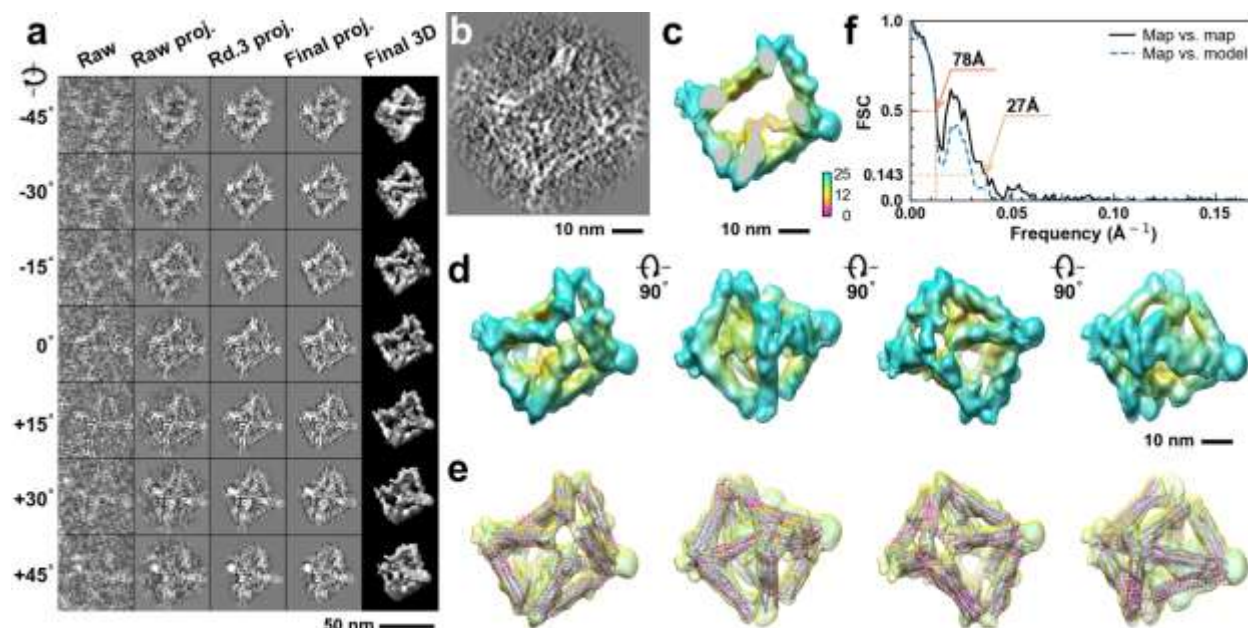

**Supplementary Fig. 337: IPET 3D reconstruction and model fitting of an individual unit-cell particle (Index: 329) within a 2D lattice with 0% ferritin loading.** **a**, Seven representative tilt images of a single unit-cell particle are shown in the first column (from left). The tilt images are aligned to a common center using IPET through iterative refinement. The projections of the raw, intermediate, and final 3D reconstruction at the corresponding angles are displayed in the subsequent four columns. **b**, A central cross-section (~23 nm thick) of the final reconstruction before masking is applied. **c**, 3D views of the central cross-section. **d**, Final 3D density map of this particle, viewed from four perpendicular directions. **e**, Final 3D reconstruction superimposed with the fitted model, viewed from four perpendicular directions. **f**, FSC analyses of the final map resolution using two methods: map-map FSC, where each map is reconstructed from one half of the images (even vs. odd tilt angle indices), and map-model FSC, where the model map is generated from the fitted model. Resolution assessments are provided based on tilt-based map-map and map-model FSC analyses at thresholds of FSC=0.5 and 0.143, respectively.



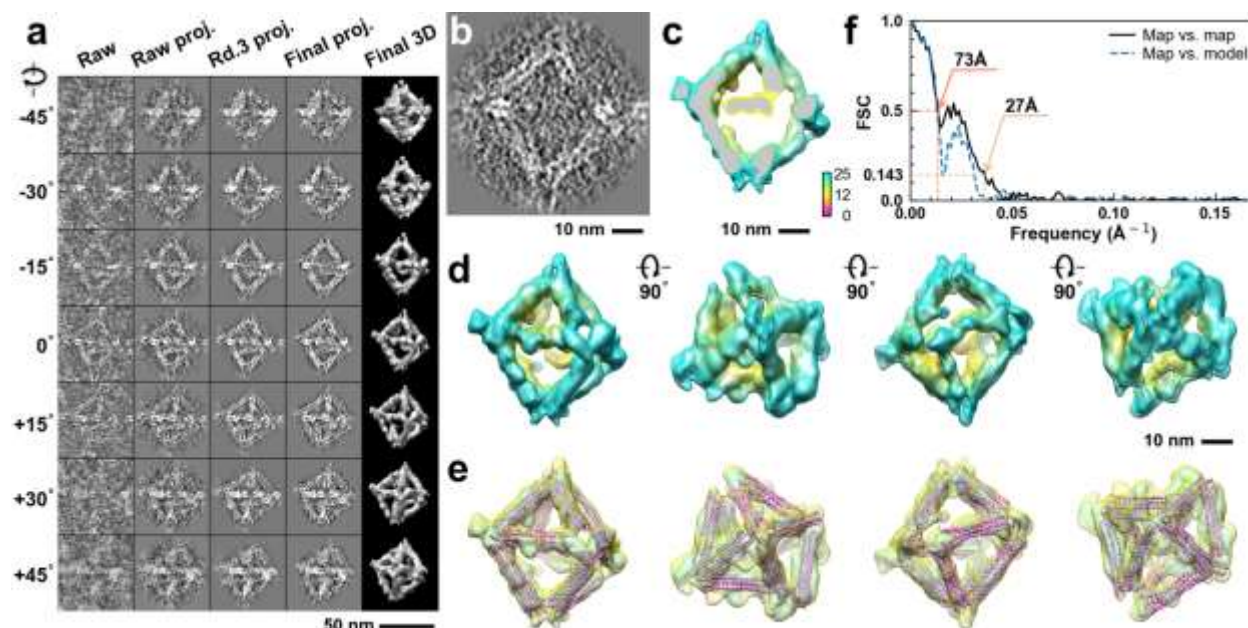

**Supplementary Fig. 338: IPET 3D reconstruction and model fitting of an individual unit-cell particle (Index: 330) within a 2D lattice with 0% ferritin loading.** **a**, Seven representative tilt images of a single unit-cell particle are shown in the first column (from left). The tilt images are aligned to a common center using IPET through iterative refinement. The projections of the raw, intermediate, and final 3D reconstruction at the corresponding angles are displayed in the subsequent four columns. **b**, A central cross-section (~23 nm thick) of the final reconstruction before masking is applied. **c**, 3D views of the central cross-section. **d**, Final 3D density map of this particle, viewed from four perpendicular directions. **e**, Final 3D reconstruction superimposed with the fitted model, viewed from four perpendicular directions. **f**, FSC analyses of the final map resolution using two methods: map-map FSC, where each map is reconstructed from one half of the images (even vs. odd tilt angle indices), and map-model FSC, where the model map is generated from the fitted model. Resolution assessments are provided based on tilt-based map-map and map-model FSC analyses at thresholds of FSC=0.5 and 0.143, respectively.

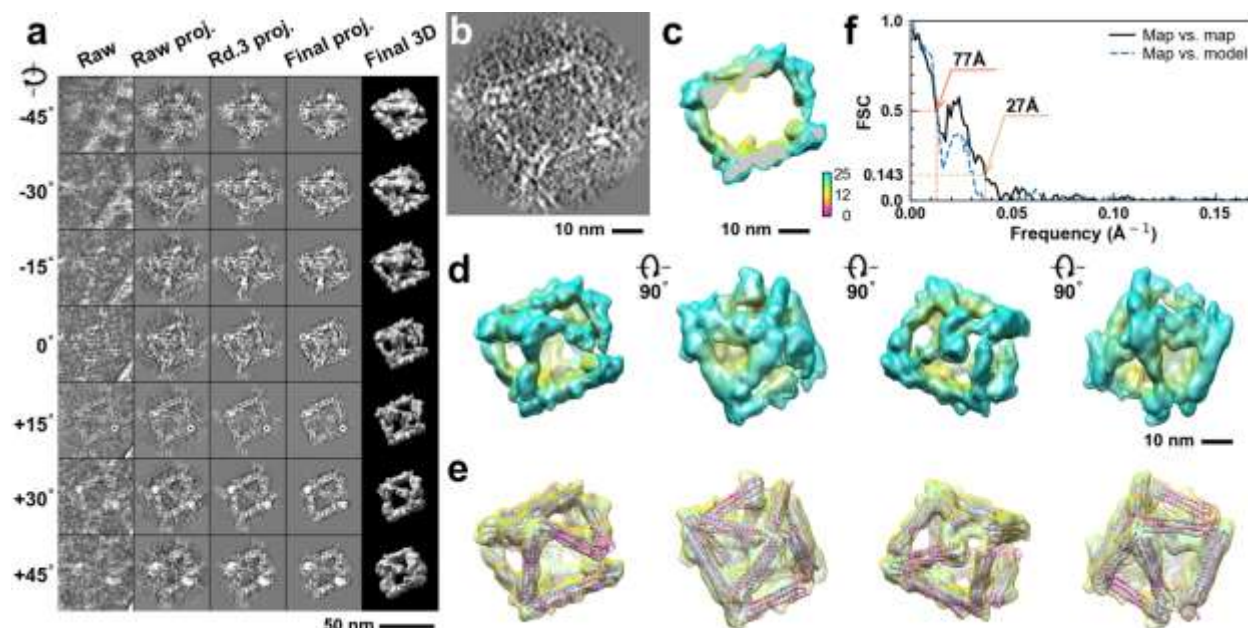

**Supplementary Fig. 339: IPET 3D reconstruction and model fitting of an individual unit-cell particle (Index: 331) within a 2D lattice with 0% ferritin loading.** **a**, Seven representative tilt images of a single unit-cell particle are shown in the first column (from left). The tilt images are aligned to a common center using IPET through iterative refinement. The projections of the raw, intermediate, and final 3D reconstruction at the corresponding angles are displayed in the subsequent four columns. **b**, A central cross-section (~23 nm thick) of the final reconstruction before masking is applied. **c**, 3D views of the central cross-section. **d**, Final 3D density map of this particle, viewed from four perpendicular directions. **e**, Final 3D reconstruction superimposed with the fitted model, viewed from four perpendicular directions. **f**, FSC analyses of the final map resolution using two methods: map-map FSC, where each map is reconstructed from one half of the images (even vs. odd tilt angle indices), and map-model FSC, where the model map is generated from the fitted model. Resolution assessments are provided based on tilt-based map-map and map-model FSC analyses at thresholds of FSC=0.5 and 0.143, respectively.

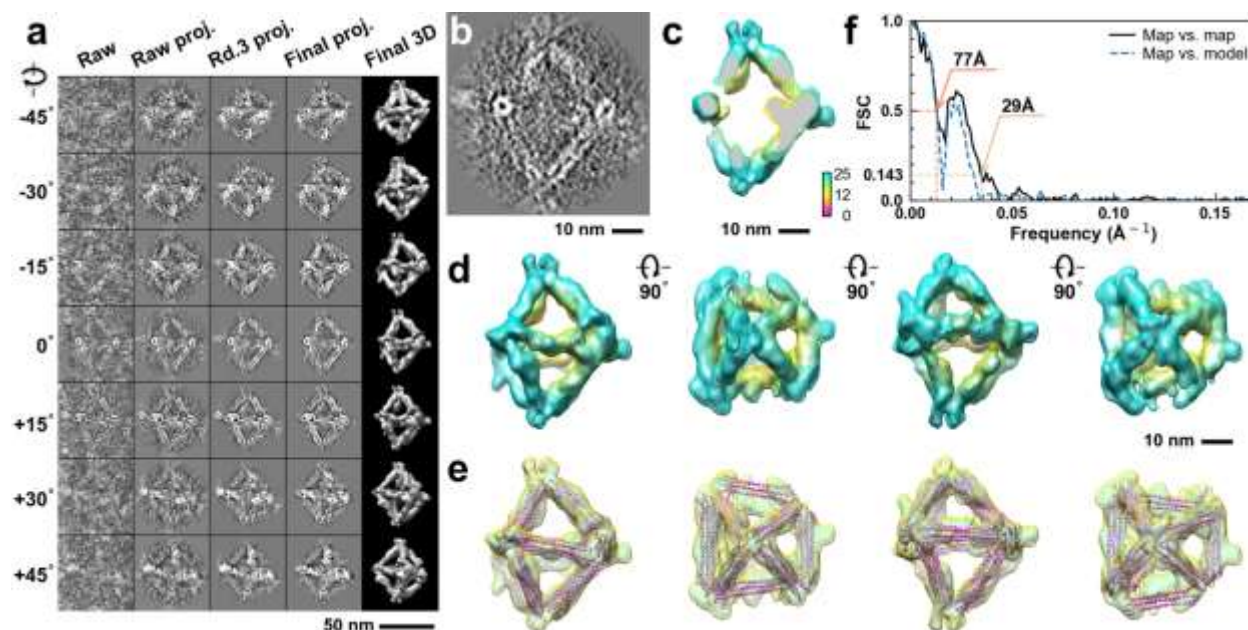

**Supplementary Fig. 340: IPET 3D reconstruction and model fitting of an individual unit-cell particle (Index: 332) within a 2D lattice with 0% ferritin loading.** **a**, Seven representative tilt images of a single unit-cell particle are shown in the first column (from left). The tilt images are aligned to a common center using IPET through iterative refinement. The projections of the raw, intermediate, and final 3D reconstruction at the corresponding angles are displayed in the subsequent four columns. **b**, A central cross-section (~23 nm thick) of the final reconstruction before masking is applied. **c**, 3D views of the central cross-section. **d**, Final 3D density map of this particle, viewed from four perpendicular directions. **e**, Final 3D reconstruction superimposed with the fitted model, viewed from four perpendicular directions. **f**, FSC analyses of the final map resolution using two methods: map-map FSC, where each map is reconstructed from one half of the images (even vs. odd tilt angle indices), and map-model FSC, where the model map is generated from the fitted model. Resolution assessments are provided based on tilt-based map-map and map-model FSC analyses at thresholds of FSC=0.5 and 0.143, respectively.

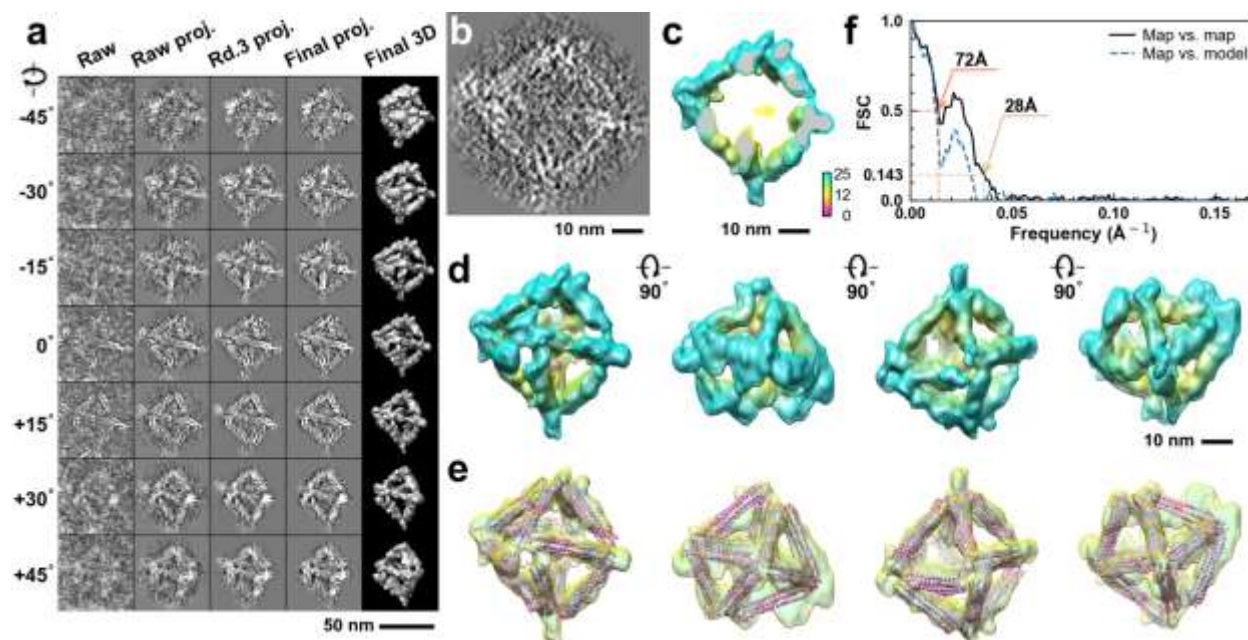

**Supplementary Fig. 341: IPET 3D reconstruction and model fitting of an individual unit-cell particle (Index: 333) within a 2D lattice with 0% ferritin loading.** **a**, Seven representative tilt images of a single unit-cell particle are shown in the first column (from left). The tilt images are aligned to a common center using IPET through iterative refinement. The projections of the raw, intermediate, and final 3D reconstruction at the corresponding angles are displayed in the subsequent four columns. **b**, A central cross-section (~23 nm thick) of the final reconstruction before masking is applied. **c**, 3D views of the central cross-section. **d**, Final 3D density map of this particle, viewed from four perpendicular directions. **e**, Final 3D reconstruction superimposed with the fitted model, viewed from four perpendicular directions. **f**, FSC analyses of the final map resolution using two methods: map-map FSC, where each map is reconstructed from one half of the images (even vs. odd tilt angle indices), and map-model FSC, where the model map is generated from the fitted model. Resolution assessments are provided based on tilt-based map-map and map-model FSC analyses at thresholds of FSC=0.5 and 0.143, respectively.



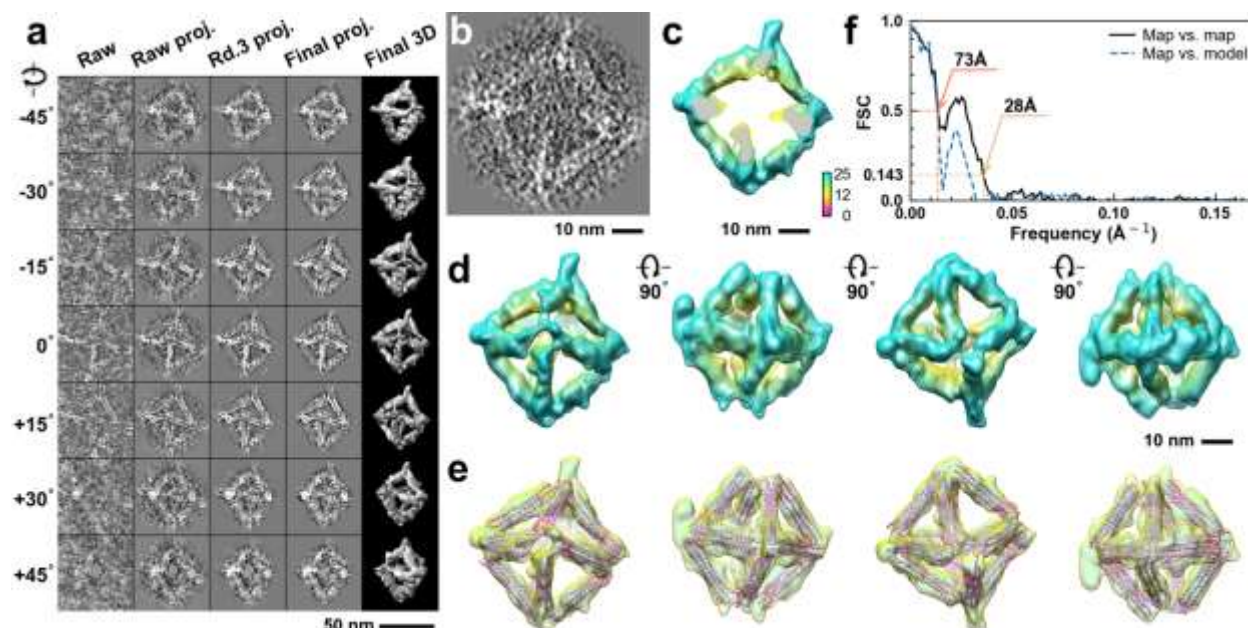

**Supplementary Fig. 342: IPET 3D reconstruction and model fitting of an individual unit-cell particle (Index: 334) within a 2D lattice with 0% ferritin loading.** **a**, Seven representative tilt images of a single unit-cell particle are shown in the first column (from left). The tilt images are aligned to a common center using IPET through iterative refinement. The projections of the raw, intermediate, and final 3D reconstruction at the corresponding angles are displayed in the subsequent four columns. **b**, A central cross-section (~23 nm thick) of the final reconstruction before masking is applied. **c**, 3D views of the central cross-section. **d**, Final 3D density map of this particle, viewed from four perpendicular directions. **e**, Final 3D reconstruction superimposed with the fitted model, viewed from four perpendicular directions. **f**, FSC analyses of the final map resolution using two methods: map-map FSC, where each map is reconstructed from one half of the images (even vs. odd tilt angle indices), and map-model FSC, where the model map is generated from the fitted model. Resolution assessments are provided based on tilt-based map-map and map-model FSC analyses at thresholds of FSC=0.5 and 0.143, respectively.

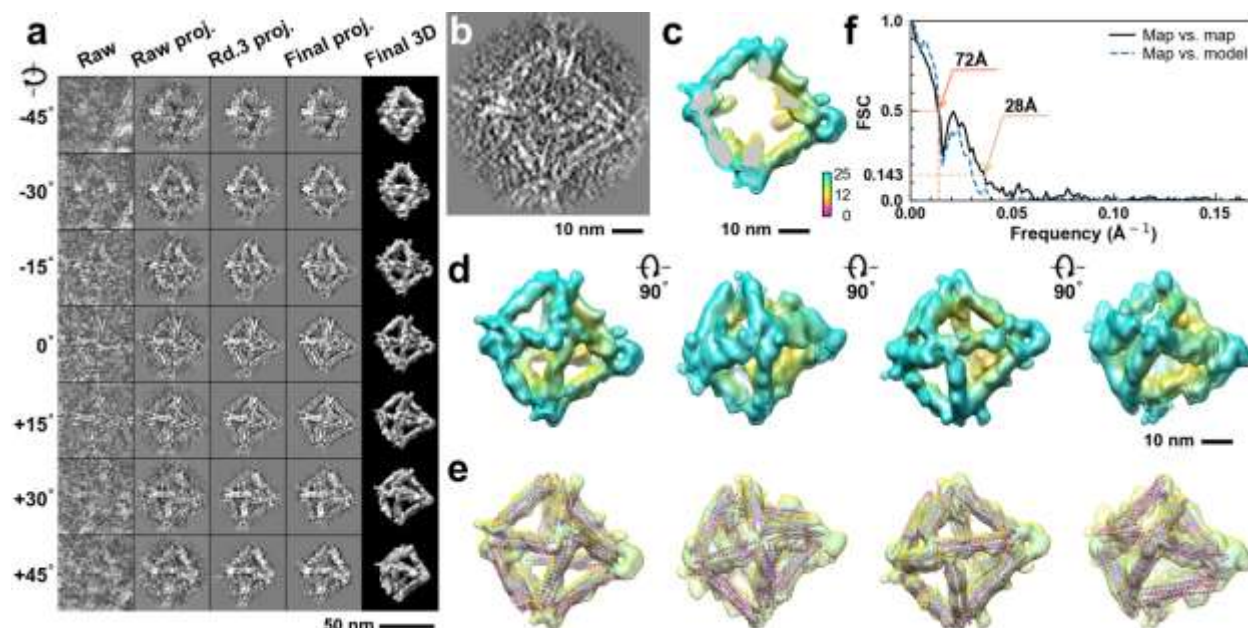

**Supplementary Fig. 343: IPET 3D reconstruction and model fitting of an individual unit-cell particle (Index: 335) within a 2D lattice with 0% ferritin loading.** **a**, Seven representative tilt images of a single unit-cell particle are shown in the first column (from left). The tilt images are aligned to a common center using IPET through iterative refinement. The projections of the raw, intermediate, and final 3D reconstruction at the corresponding angles are displayed in the subsequent four columns. **b**, A central cross-section (~23 nm thick) of the final reconstruction before masking is applied. **c**, 3D views of the central cross-section. **d**, Final 3D density map of this particle, viewed from four perpendicular directions. **e**, Final 3D reconstruction superimposed with the fitted model, viewed from four perpendicular directions. **f**, FSC analyses of the final map resolution using two methods: map-map FSC, where each map is reconstructed from one half of the images (even vs. odd tilt angle indices), and map-model FSC, where the model map is generated from the fitted model. Resolution assessments are provided based on tilt-based map-map and map-model FSC analyses at thresholds of FSC=0.5 and 0.143, respectively.

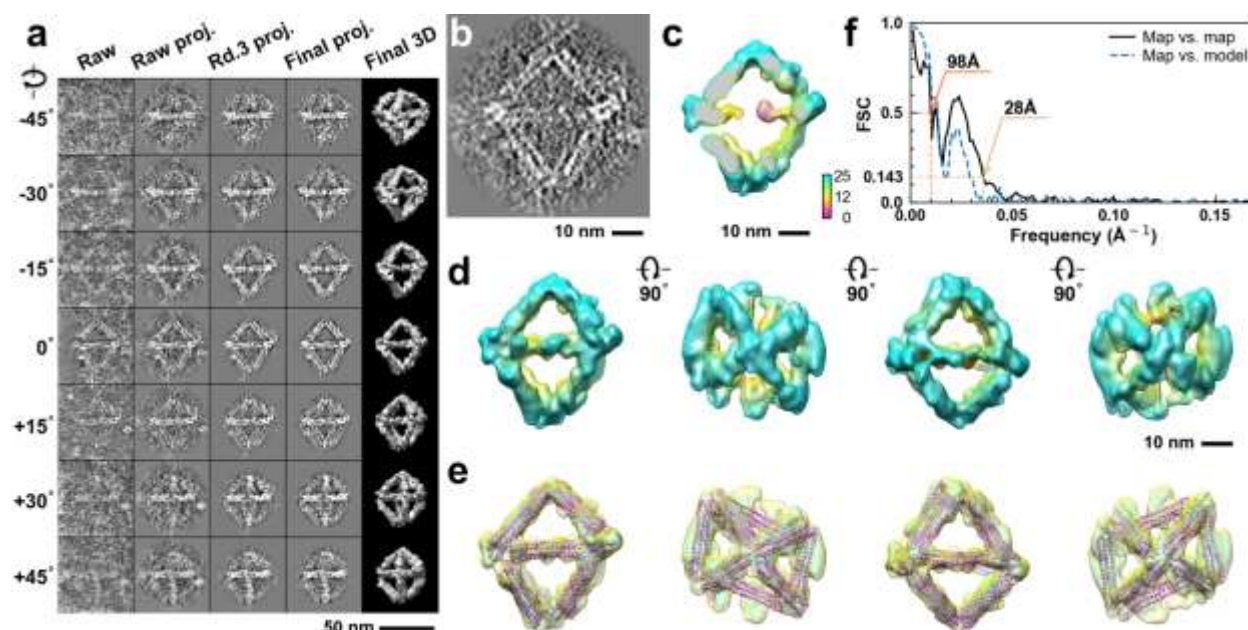

**Supplementary Fig. 344: IPET 3D reconstruction and model fitting of an individual unit-cell particle (Index: 336) within a 2D lattice with 0% ferritin loading.** **a**, Seven representative tilt images of a single unit-cell particle are shown in the first column (from left). The tilt images are aligned to a common center using IPET through iterative refinement. The projections of the raw, intermediate, and final 3D reconstruction at the corresponding angles are displayed in the subsequent four columns. **b**, A central cross-section (~23 nm thick) of the final reconstruction before masking is applied. **c**, 3D views of the central cross-section. **d**, Final 3D density map of this particle, viewed from four perpendicular directions. **e**, Final 3D reconstruction superimposed with the fitted model, viewed from four perpendicular directions. **f**, FSC analyses of the final map resolution using two methods: map-map FSC, where each map is reconstructed from one half of the images (even vs. odd tilt angle indices), and map-model FSC, where the model map is generated from the fitted model. Resolution assessments are provided based on tilt-based map-map and map-model FSC analyses at thresholds of FSC=0.5 and 0.143, respectively.

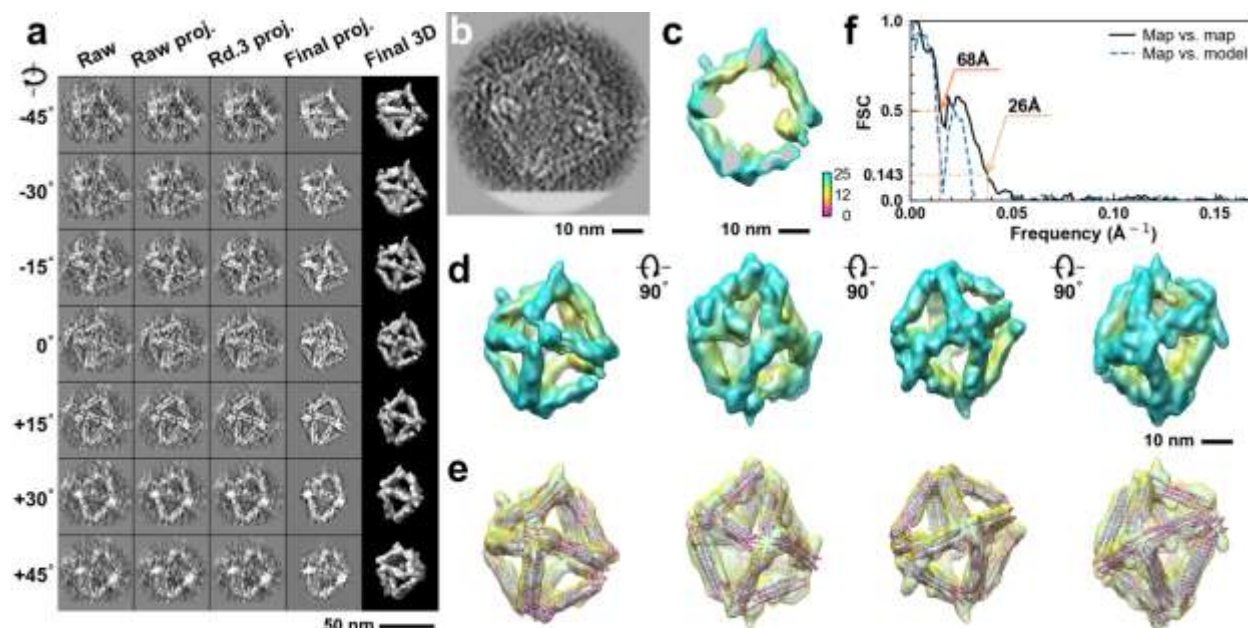

**Supplementary Fig. 345: IPET 3D reconstruction and model fitting of an individual unit-cell particle (Index: 337) within a 2D lattice with 0% ferritin loading.** **a**, Seven representative tilt images of a single unit-cell particle are shown in the first column (from left). The tilt images are aligned to a common center using IPET through iterative refinement. The projections of the raw, intermediate, and final 3D reconstruction at the corresponding angles are displayed in the subsequent four columns. **b**, A central cross-section (~23 nm thick) of the final reconstruction before masking is applied. **c**, 3D views of the central cross-section. **d**, Final 3D density map of this particle, viewed from four perpendicular directions. **e**, Final 3D reconstruction superimposed with the fitted model, viewed from four perpendicular directions. **f**, FSC analyses of the final map resolution using two methods: map-map FSC, where each map is reconstructed from one half of the images (even vs. odd tilt angle indices), and map-model FSC, where the model map is generated from the fitted model. Resolution assessments are provided based on tilt-based map-map and map-model FSC analyses at thresholds of FSC=0.5 and 0.143, respectively.
